# Supplementary material for: Novel insights from a multiomics dissection of the Hayflick limit
Source: eLife. 2022 Feb 4;11:e70283. doi: 10.7554/eLife.70283 (PMC8933007; doi:10.7554/eLife.70283)
Supplement: Figure 1—source data 1. [file elife-70283-fig1-data1.xlsx]

## Sheet: RS time course sample manifest
				BATCH A					BATCH B
	PDL20	PDL25	PDL29	PDL33	PDL37	PDL20	PDL25	PDL45	PDL52
bulk RNA seq	X	X	X	X	X	X	X	X	X
scRNA seq		X	X	X	X	X	X
proteomics	X	X	X	X	X	X	X
metabalomics		X	X	X	X	X	X
ATAC	X	X	X	X	X	X	X
	TP1	TP2	TP3	TP4	TP5	TP6	TP7
bulk RNA seq	X	X		X	X	X	X
scRNA seq		X					X
proteomics	X	X		X	X	X	X
metabolomics		X		X	X	X	X
ATAC	X	X		X	X	X	X

## Sheet: RS ATAC QC stats
Sample Name	reads_mapped-duplicates removed	Dups	Aligned	%mito reads	TSS enrichment score	strain
PDL20_TP1_omni_A_S4_R1_001	77.4	0.318	0.959	0.812816	60.3217	hTERT
PDL20_TP1_omni_B_S5_R1_001.flagtat	78.8	0.391	0.961	0.680846	59.2503	hTERT
PDL20_TP1_omni_C_S6_R1_001.flagtat	75.9	0.319	0.961	0.74612	50.4248	hTERT
PDL25_TP2_omni_A_S16_R1_001.flagtat	76	0.223	0.961	0.481441	56.6263	hTERT
PDL25_TP2_omni_B_S17_R1_001.flagtat	82.9	0.328	0.964	0.487636	61.8025	hTERT
PDL25_TP2_omni_C_S18_R1_001	90	0.173	0.962	0.490919	53.4461	hTERT
PDL30_TP3_omni_A_S24_R1_001	66.1	0.344	0.96	0.509649	84.4115	hTERT
PDL30_TP3_omni_B_S25_R1_001	73.4	0.383	0.965	0.48134	101.348	hTERT
PDL30_TP3_omni_C_S26_R1_001	74.9	0.372	0.96	0.480234	85.2396	hTERT
PDL33_TP4_omni_A_S30_R1_001	51.2	0.33	0.961	0.485099	60.7167	hTERT
PDL33_TP4_omni_B_S31_R1_001	67.1	0.343	0.963	0.372183	49.1509	hTERT
PDL33_TP4_omni_C_S32_R1_001	64.7	0.379	0.963	0.445656	54.8734	hTERT
PDL37_TP5_omni_A_S36_R1_001	29.7	0.584	0.957	0.670994	51.3126	hTERT
PDL37_TP5_omni_B_S37_R1_001	43.6	0.502	0.956	0.640725	66.5385	hTERT
PDL37_TP5_omni_C_S38_R1_001	28.4	0.595	0.957	1.3016	102.754	hTERT
PDL46_TP6_omni_A_S42_R1_001	44.9	0.461	0.96	1.18073	88.8328	hTERT
PDL46_TP6_omni_B_S43_R1_001	55.3	0.327	0.961	1.25465	54.9906	WT
PDL50_TP7_omni_A_S48_R1_001	38	0.685	0.963	1.28342	54.6432	WT
PDL50_TP7_omni_B_S49_R1_001	31.7	0.733	0.959	1.2799	50.6597	WT
hTERT_TP1_omni_A_S1_R1_001	49.5	0.272	0.959	0.342886	33.2368	WT
hTERT_TP1_omni_B_S2_R1_001	80	0.309	0.96	0.33494	38.8377	WT
hTERT_TP1_omni_C_S3_R1_001	59.1	0.35	0.958	0.310608	33.4755	WT
hTERT_TP2_omni_A_S13_R1_001	71.7	0.257	0.959	0.502638	49.1725	WT
hTERT_TP2_omni_B_S14_R1_001	73.9	0.247	0.962	0.479009	66.9435	WT
hTERT_TP2_omni_C_S15_R1_001	70.4	0.341	0.96	0.487459	53.6084	WT
hTERT_TP4_omni_A_S27_R1_001	87.1	0.28	0.96	0.523948	45.0484	WT
hTERT_TP4_omni_B_S28_R1_001	98.5	0.359	0.965	0.466133	54.3785	WT
hTERT_TP4_omni_C_S29_R1_001	92.2	0.331	0.963	0.495041	42.0462	WT
hTERT_TP5_omni_A_S33_R1_001	41.1	0.49	0.958	0.542854	29.8643	WT
hTERT_TP5_omni_B_S34_R1_001	61.3	0.369	0.957	0.425946	27.9708	WT
hTERT_TP5_omni_C_S35_R1_001	48.2	0.481	0.959	0.574224	27.9886	WT
hTERT_TP6_omni_A_S39_R1_001.flagtat	38.8	0.867	0.957	0.591209	27.9844	WT
hTERT_TP6_omni_C_S41_R1_001.flagtat	45.6	0.413	0.958	0.517947	31.6897	WT
hTERT_TP7_omni_A_S45_R1_001.flagtat	57.6	0.425	0.962	0.401409	25.9652	WT
hTERT_TP7_omni_B_S46_R1_001	67.9	0.474	0.963	0.45447	22.0595	WT

## Sheet: RS bulk RNAseq QC stats
Sample Name	% Aligned	M Aligned
PDL20_TP1_A_S2_R1_001	0.857	32
PDL20_TP1_B_S21_R1_001	0.901	35.2
PDL20_TP1_C_S39_R1_001	0.861	36.7
PDL25_TP2_A_S12_R1_001	0.88	50.1
PDL25_TP2_B_S28_R1_001	0.895	26.4
PDL25_TP2_C_S37_R1_001	0.883	18.6
PDL28_TP3_A_S4_R1_001	0.875	38
PDL28_TP3_B_S15_R1_001	0.847	37.6
PDL28_TP3_C_S34_R1_001	0.884	36.5
PDL33_TP4_A_S10_R1_001	0.871	37.8
PDL33_TP4_B_S23_R1_001	0.857	33.1
PDL33_TP4_C_S27_R1_001	0.885	32
PDL37_TP5_A_S6_R1_001	0.86	33.9
PDL37_TP5_B_S16_R1_001	0.85	44.2
PDL37_TP5_C_S29_R1_001	0.891	16.3
PDL46_TP6_A_S18_R1_001	0.892	38
PDL46_TP6_B_S3_R1_001	0.851	32.8
PDL46_TP6_C_S25_R1_001	0.883	34.4
PDL50_TP7_A_S31_R1_001	0.849	23.8
PDL50_TP7_B_S8_R1_001	0.852	38.7
PDL50_TP7_C_S36_R1_001	0.867	30.8
WI-38_PDL_45_A_S1_L006_R1_001	0.915	44.2
WI-38_PDL_45_B_S2_L006_R1_001	0.915	40.5
WI-38_PDL_45_C_S3_L006_R1_001	0.911	42.3
WI-38_PDL_52_A_S4_L006_R1_001	0.891	38
WI-38_PDL_52_B_S5_L006_R1_001	0.892	43.1
WI-38_PDL_52_C_S6_L006_R1_001	0.901	35.2
WI-38_PDL_53_A_S7_L006_R1_001	0.904	41.7
WI-38_PDL_53_B_S8_L006_R1_001	0.922	47.4
WI-38_PDL_53_C_S9_L006_R1_001	0.906	33.8
hTERT_TP1_A_S9_R1_001	0.865	42.8
hTERT_TP1_B_S5_R1_001	0.875	34.8
hTERT_TP1_C_S24_R1_001	0.863	40.4
hTERT_TP2_A_S1_R1_001	0.833	36.9
hTERT_TP2_B_S13_R1_001	0.867	36.9
hTERT_TP2_C_S20_R1_001	0.882	38.3
hTERT_TP4_A_S35_R1_001	0.873	34
hTERT_TP4_B_S30_R1_001	0.873	32
hTERT_TP4_C_S17_R1_001	0.898	36
hTERT_TP5_A_S19_R1_001	0.888	33.3
hTERT_TP5_B_S26_R1_001	0.891	35.2
hTERT_TP5_C_S38_R1_001	0.886	35.5
hTERT_TP6_A_S7_R1_001	0.862	35.2
hTERT_TP6_B_S11_R1_001	0.856	32
hTERT_TP6_C_S14_R1_001	0.862	36.2
hTERT_TP7_A_S22_R1_001	0.874	33.7
hTERT_TP7_B_S32_R1_001	0.865	32.8
hTERT_TP7_C_S33_R1_001	0.895	35.7

## Sheet: CD bulk RNAseq  QC stats
Sample Name	% Aligned	M Aligned
PDL23_A_D10_20p_S91_R1_001	0.897	30.8
PDL23_A_D10_3p_S10_R1_001	0.877	16.6
PDL23_A_D1_20p_S82_R1_001	0.882	31.8
PDL23_A_D1_3p_S1_R1_001	0.916	30.3
PDL23_A_D1_5_20p_S83_R1_001	0.885	45.2
PDL23_A_D1_5_3p_S2_R1_001	0.908	57.7
PDL23_A_D2_20p_S84_R1_001	0.874	14.7
PDL23_A_D2_3p_S3_R1_001	0.906	13.2
PDL23_A_D2_5_20p_S85_R1_001	0.882	16.6
PDL23_A_D2_5_3p_S4_R1_001	0.908	14.9
PDL23_A_D2_75_20p_S86_R1_001	0.867	30.6
PDL23_A_D2_75_3p_S5_R1_001	0.898	20.5
PDL23_A_D3_20p_S87_R1_001	0.883	25.9
PDL23_A_D3_3p_S6_R1_001	0.889	12.5
PDL23_A_D3_5_20p_S118_R1_001	0.884	20.8
PDL23_A_D3_5_3p_S7_R1_001	0.903	16
PDL23_A_D4_20p_S89_R1_001	0.888	32.4
PDL23_A_D4_3p_S8_R1_001	0.894	16.6
PDL23_A_D7_20p_S90_R1_001	0.884	26.2
PDL23_A_D7_3p_S9_R1_001	0.896	19.2
PDL23_B_D10_20p_S101_R1_001	0.879	26.7
PDL23_B_D10_3p_S22_R1_001	0.901	17.2
PDL23_B_D1_20p_S92_R1_001	0.873	23.7
PDL23_B_D1_3p_S13_R1_001	0.915	19.1
PDL23_B_D1_5_20p_S93_R1_001	0.883	23.8
PDL23_B_D1_5_3p_S14_R1_001	0.909	24.2
PDL23_B_D2_20p_S94_R1_001	0.887	22.5
PDL23_B_D2_3p_S15_R1_001	0.905	20.6
PDL23_B_D2_5_20p_S95_R1_001	0.886	27.7
PDL23_B_D2_5_3p_S16_R1_001	0.906	16.5
PDL23_B_D2_75_20p_S96_R1_001	0.867	19.3
PDL23_B_D2_75_3p_S17_R1_001	0.894	17.4
PDL23_B_D3_20p_S97_R1_001	0.887	24.9
PDL23_B_D3_3p_S18_R1_001	0.899	16
PDL23_B_D3_5_20p_S128_R1_001	0.889	10
PDL23_B_D3_5_3p_S19_R1_001	0.901	18.2
PDL23_B_D4_20p_S99_R1_001	0.886	28.9
PDL23_B_D4_3p_S20_R1_001	0.895	16.2
PDL23_B_D7_20p_S100_R1_001	0.877	6.7
PDL23_B_D7_3p_S21_R1_001	0.903	18.9
PDL23_C_D10_20p_S111_R1_001	0.892	25.9
PDL23_C_D10_3p_S34_R1_001	0.895	19.3
PDL23_C_D1_20p_S102_R1_001	0.888	20.9
PDL23_C_D1_3p_S25_R1_001	0.909	22.9
PDL23_C_D1_5_20p_S103_R1_001	0.894	30.5
PDL23_C_D1_5_3p_S26_R1_001	0.909	19.8
PDL23_C_D2_20p_S104_R1_001	0.875	22.2
PDL23_C_D2_3p_S27_R1_001	0.905	20.3
PDL23_C_D2_5_20p_S105_R1_001	0.89	25.3
PDL23_C_D2_5_3p_S28_R1_001	0.907	17.2
PDL23_C_D2_75_20p_S106_R1_001	0.874	25.2
PDL23_C_D2_75_3p_S29_R1_001	0.899	16.2
PDL23_C_D3_20p_S107_R1_001	0.895	31.2
PDL23_C_D3_3p_S30_R1_001	0.903	17.2
PDL23_C_D3_5_20p_S138_R1_001	0.89	16
PDL23_C_D3_5_3p_S31_R1_001	0.902	14.6
PDL23_C_D4_20p_S109_R1_001	0.898	27.7
PDL23_C_D4_3p_S32_R1_001	0.896	18.6
PDL23_C_D7_20p_S110_R1_001	0.889	21.4
PDL23_C_D7_3p_S33_R1_001	0.899	15.2
PDL48_A_D10_20p_S121_R1_001	0.892	22.7
PDL48_A_D10_3p_S46_R1_001	0.91	18.3
PDL48_A_D1_20p_S112_R1_001	0.883	19.5
PDL48_A_D1_3p_S37_R1_001	0.903	20.1
PDL48_A_D1_5_20p_S113_R1_001	0.892	19.6

## Sheet: RIS RNAseq QC stats
Sample Name	% Aligned	M Aligned
d1_A_S22_R1_001	0.894	10.2
d1_B_S23_R1_001	0.905	14.5
d1_C_S24_R1_001	0.887	12.6
d1_xray_A_S1_R1_001	0.895	14.3
d1_xray_B_S2_R1_001	0.915	14.5
d1_xray_C_S3_R1_001	0.91	12.2
d2_A_S25_R1_001	0.903	18.2
d2_B_S26_R1_001	0.897	12.5
d2_C_S27_R1_001	0.904	14.2
d2_xray_A_S4_R1_001	0.912	15.1
d2_xray_B_S5_R1_001	0.898	14.5
d2_xray_C_S6_R1_001	0.904	13.1
d3_A_S28_R1_001	0.886	13.8
d3_B_S29_R1_001	0.898	12.9
d3_C_S30_R1_001	0.898	11.2
d3_xray_A_S7_R1_001	0.909	15
d3_xray_B_S8_R1_001	0.899	13.6
d3_xray_C_S9_R1_001	0.911	14.2
d4_A_S31_R1_001	0.906	13.6
d4_B_S32_R1_001	0.897	11.9
d4_C_S33_R1_001	0.895	12.2
d4_xray_A_S10_R1_001	0.9	15.5
d4_xray_B_S11_R1_001	0.915	11.5
d4_xray_C_S12_R1_001	0.914	14.4
d5_A_S34_R1_001	0.884	11.9
d5_B_S35_R1_001	0.903	12.5
d5_C_S36_R1_001	0.903	14
d5_xray_A_S13_R1_001	0.899	13.8
d5_xray_B_S14_R1_001	0.893	12.8
d5_xray_C_S15_R1_001	0.893	12.5
d6_A_S37_R1_001	0.882	11
d6_B_S38_R1_001	0.878	11.9
d6_C_S39_R1_001	0.905	14
d6_xray_A_S16_R1_001	0.906	14.7
d6_xray_B_S17_R1_001	0.89	13.2
d6_xray_C_S18_R1_001	0.899	14
d9_A_S40_R1_001	0.901	14.5
d9_B_S41_R1_001	0.894	11.1
d9_C_S42_R1_001	0.902	15.6
d9_xray_A_S19_R1_001	0.916	14.8
d9_xray_B_S20_R1_001	0.884	13.2
d9_xray_C_S21_R1_001	0.921	14.3

## Sheet: Verteporfin  RNAseq QC stats
Sample Name	% Aligned	M Aligned
2hrs_0uM_MYF0137_A_S22_R1_001	0.855	26.7
2hrs_0uM_MYF0137_B_S23_R1_001	0.813	25.2
2hrs_0uM_MYF0137_C_S24_R1_001	0.825	25.5
2hrs_0uM_VP_A_S4_R1_001	0.869	33.2
2hrs_0uM_VP_B_S5_R1_001	0.861	28.4
2hrs_0uM_VP_C_S6_R1_001	0.84	24.2
2hrs_10uM_MYF0137_A_S28_R1_001	0.869	30
2hrs_10uM_MYF0137_B_S29_R1_001	0.877	23.7
2hrs_10uM_MYF0137_C_S30_R1_001	0.871	17.1
2hrs_10uM_VP_A_S10_R1_001	0.813	22.7
2hrs_10uM_VP_B_S11_R1_001	0.81	22.9
2hrs_10uM_VP_C_S12_R1_001	0.831	20.4
2hrs_5uM_MYF0137_A_S25_R1_001	0.867	29.4
2hrs_5uM_MYF0137_B_S26_R1_001	0.862	27.1
2hrs_5uM_MYF0137_C_S27_R1_001	0.864	25.3
2hrs_5uM_VP_A_S7_R1_001	0.821	26.2
2hrs_5uM_VP_B_S8_R1_001	0.809	29
2hrs_5uM_VP_C_S9_R1_001	0.811	18.3
