# Supplementary material for: Novel insights from a multiomics dissection of the Hayflick limit
Source: eLife. 2022 Feb 4;11:e70283. doi: 10.7554/eLife.70283 (PMC8933007; doi:10.7554/eLife.70283)
Supplement: Figure 1—source data 3. [file elife-70283-fig1-data3.xlsx]

## Sheet: readme
		Input for GSEA timecourses is the log2Fold change column in deseq results (sData2)
		first three sheets: GSEA results from full time course deseq2 results (sData2)
		sheet: indivdual.tp.gsea_input
		rest of sheets GSEA results for each TP or PDL

## Sheet: gsea_timecourse_RS
pathway	pval	padj	log2err	ES	NES	size	leadingEdge
HALLMARK_ADIPOGENESIS	0.369295	0.450359	0.0614364	0.344395	1.06338	192	C3, LEP, PTGER3, GPX3, ANGPTL4, CD36, LAMA4, COL4A1, ABCA1, SORBS1, REEP6, DNAJB9, NABP1, STOM, PDCD4, LPCAT3, SQOR, HSPB8, SCARB1, REEP5, MYLK, ADCY6, IFNGR1, MAP4K3, TST, RMDN3, RIOK3, GBE1, CCNG2, DHRS7B, ETFB
HALLMARK_ALLOGRAFT_REJECTION	0.00161969	0.0041392	0.45506	0.518712	1.57407	143	CCND2, IL1B, CCL2, INHBB, CD40, CD1D, TGFB2, ICOSLG, IL6, HLA-DMB, IL12A, CCL5, GPR65, CD4, INHBA, IL7, IL12RB1, HLA-DOB, CD7, HLA-G, LIF, EREG, IL18, WAS, CTSS, TIMP1, STAT1, ITGB2, TLR1, KLRD1, TLR3, TAP1, GBP2, CCND3, HLA-E, GALNT1, IFNGR1, ACVR2A, F2R, FAS, HCLS1, HIF1A, SRGN, EIF4G3, TAPBP
HALLMARK_ANDROGEN_RESPONSE	0.796031	0.829199	0.0283628	0.276884	0.809915	96	HOMER2, DNAJB9, PMEPA1, CDK6, PTK2B, NDRG1, SAT1, ANKH, MAP7, SLC26A2, IQGAP2, ABCC4, CCND3, CCND1, B4GALT1, GPD1L, ITGAV, SPCS3, NKX3-1, B2M, TSC22D1, LMAN1, BMPR1B
HALLMARK_ANGIOGENESIS	0.006968	0.013936	0.407018	0.656861	1.62889	31	CCND2, JAG2, OLR1, LUM, MSX1, VTN, JAG1, POSTN, TNFRSF21, COL3A1, LRPAP1, COL5A2, TIMP1, FSTL1, SPP1, ITGAV, APP
HALLMARK_APICAL_JUNCTION	0.101042	0.158819	0.1396	0.394703	1.21651	187	ACTN2, PPP2R2C, LAMA3, VCAM1, TGFBI, NECTIN4, ADAMTS5, CALB2, NRTN, TNFRSF11B, LAMB3, ADAM23, AMIGO1, ALOX15B, TMEM8B, CD34, LAMC2, CERCAM, CDH15, FBN1, PIK3R3, CDH6, SDC3, ATP1A3, LDLRAP1, B4GALT1, MADCAM1, RAC2, GNAI1, VWF, TSPAN4, JUP, SKAP2, TJP1, AMH, PARD6G, ADAM15, MPZL1, RRAS, JAM3, MYL9, ITGB1, PKD1, ADAM9, MAPK11, CLDN14, BMP1, SIRPA, PECAM1, MAP3K20, CRAT, NLGN2
HALLMARK_APICAL_SURFACE	0.311224	0.399006	0.08042	0.436178	1.1259	38	SULF2, NTNG1, ATP6V0A4, TMEM8B, DCBLD2, MDGA1, LYPD3, B4GALT1, ADAM10, ATP8B1, APP, SRPX, GSTM3, PCSK9, IL2RB, SLC2A4
HALLMARK_APOPTOSIS	0.00764463	0.0147012	0.407018	0.470364	1.43279	152	IL1A, CCND2, IL1B, TXNIP, GPX3, TGFB2, BMP2, IL6, CD14, LUM, CDKN1A, CCNA1, SOD2, EREG, IL18, SAT1, ANKH, ATF3, TIMP1, CD44, BTG2, PDCD4, TAP1, PLAT, CLU, CCND1, BNIP3L, DNAJC3, APP, BCAP31, IFNGR1, HGF, IGF2R, TNFSF10, MGMT, F2R, SC5D, AIFM3, PPP2R5B, FAS
HALLMARK_BILE_ACID_METABOLISM	0.00199856	0.00454219	0.431708	0.547064	1.597	94	ALDH1A1, ABCA3, PIPOX, BMP6, ABCD2, HSD17B6, CYP39A1, ABCA6, ABCA9, CYP46A1, ABCA1, ALDH8A1, ABCA2, NR3C2, ACSL5, SLC22A18
HALLMARK_CHOLESTEROL_HOMEOSTASIS	0.897701	0.897701	0.0242154	0.251337	0.714278	72	MAL2, LGMN, JAG1, ABCA2, CXCL16, ATF3, TP53INP1, CLU, GNAI1
HALLMARK_COAGULATION	4.8172e-05	0.000218964	0.557332	0.600007	1.78459	110	C3, COMP, MMP10, MMP3, DPP4, PDGFB, OLR1, F3, ITGB3, LGMN, PRSS23, C9, F8, C1S, A2M, S100A1, MMP15, SERPING1, TIMP1, FBN1, C8G, KLKB1, THBS1, CTSO, PLAU, PROS1, PLAT, SPARC, CLU, MMP1, DUSP6, SERPINB2, CPQ, VWF, HTRA1, F2RL2, LRP1, TFPI2, MST1, RGN, CTSB, ARF4, ADAM9, BMP1, PECAM1, ISCU, PLEK
HALLMARK_COMPLEMENT	0.000747587	0.00207663	0.477271	0.504509	1.54701	172	C3, LTF, ACTN2, KYNU, IL6, DPP4, PDGFB, OLR1, CD36, CCL5, F3, RASGRP1, CDA, LGMN, C9, F8, C1S, MMP15, SERPING1, WAS, CTSS, TIMP1, COL4A2, KLKB1, CD55, CTSO, PRSS3, PLAT, CLU, DUSP6, DOCK9, KCNIP3, DGKH, SERPINB2, CPQ, CD59, PRCP, CD46, LRP1, CTSD, GCA, TFPI2, ERAP2, CTSB, CASP10, VCPIP1
HALLMARK_DNA_REPAIR	4.02143e-07	2.87245e-06	0.674963	-0.459658	-1.88016	150	PRIM1, ZWINT, RFC3, TYMS, RFC5, AC139530.1, RFC4, FEN1, RPA3, LIG1, SSRP1, NT5C, RAD51, RFC2, POLA1, POLD1, ALYREF, POLA2, ZNRD1, ITPA, PNP, IMPDH2, NME1, DUT, POLD3, PCNA, NELFCD, TARBP2, GSDME, TAF1C, DGCR8, POLR1C, ERCC8, GTF3C5, RBX1, HPRT1, NELFE, TAF9, SF3A3, RAE1, TAF6, POLR2F, POLR2G, BCAM, VPS28, TAF10, ERCC1, UMPS, POLR1D, ARL6IP1, POLR2C, GPX4, MRPL40, POLR2J
HALLMARK_E2F_TARGETS	8.08046e-65	4.04023e-63	2.10019	-0.824102	-3.52713	200	AURKB, CDC20, PLK1, KIF2C, CENPM, KIF18B, BIRC5, LMNB1, SPC25, CDKN2C, TK1, KIF4A, CDK1, TCF19, CDCA8, DLGAP5, CDCA3, CDKN3, SPAG5, MKI67, BUB1B, ASF1B, CCNB2, PLK4, PTTG1, SPC24, RRM2, DEPDC1, MYBL2, HMMR, MCM7, TOP2A, E2F8, TACC3, MAD2L1, RAD51AP1, CIT, CENPE, EZH2, ESPL1, RNASEH2A, SHMT1, CKS1B, TRIP13, HMGB2, MCM5, RACGAP1, H2AFZ, SMC4, TMPO, GINS1, MCM3, RFC3, MELK, UBE2T, BRCA2, HELLS, KIF2…
HALLMARK_EPITHELIAL_MESENCHYMAL_TRANSITION	6.9023e-07	4.31393e-06	0.659444	0.570794	1.76437	196	COMP, MFAP5, SCG2, FMOD, MGP, MMP3, COL5A3, LAMA3, VCAM1, SGCD, TGFBI, SERPINE2, FUCA1, IL6, CRLF1, LUM, CADM1, APLP1, MSX1, TNFRSF11B, ITGB3, SPOCK1, COL4A1, IGFBP4, INHBA, WNT5A, NNMT, EDIL3, IGFBP3, ITGB5, PLOD2, IGFBP2, LOX, ADAM12, PMEPA1, POSTN, LAMC2, GJA1, COL3A1, NID2, SAT1, COL5A2, PMP22, TIMP1, CD44, FGF2, COL4A2, PVR, COL5A1, IL32, FBN1, THBS1, MEST, CDH6, FSTL1, ACTA2, SPP1, CALD1, N…
HALLMARK_ESTROGEN_RESPONSE_EARLY	0.00815891	0.0151091	0.38073	0.465799	1.43627	188	CALCR, ABCA3, INHBB, RETREG1, PGR, CYP26B1, GREB1, SYBU, CALB2, OLFM1, SLC1A1, DEPTOR, RASGRP1, GFRA1, MAPT, OPN3, IGFBP4, TIAM1, ABAT, DHRS3, PRSS23, ENDOD1, MUC1, CELSR1, SLC2A1, GJA1, SVIL, NBL1, WFS1, DYNLT3, CLIC3, CD44, P2RY2, ADCY1, SYNGR1, STC2, SLC26A2, THSD4, AFF1, HSPB8, SCARB1, CCND1, B4GALT1, TSKU, SLC22A5, AMFR, ADCY9, SYT12, KRT15, FRK, PDZK1, TBC1D30, HES1, SLC39A6, PAPSS2, ABLIM1…
HALLMARK_ESTROGEN_RESPONSE_LATE	0.294737	0.387812	0.0732559	0.359691	1.10587	179	CALCR, LTF, ABCA3, PTGER3, PGR, CYP26B1, SERPINA3, OLFM1, MAPT, OPN3, IGFBP4, TIAM1, TRIM29, PRSS23, NMU, CCNA1, HOMER2, PERP, LAMC2, PLXNB1, NBL1, WFS1, DYNLT3, CLIC3, ST6GALNAC2, CD44, PDCD4, SLC26A2, MEST, GAL, AFF1, HSPB8, LLGL2, SCARB1, CCND1, SLC22A5, AMFR, TSPAN13, TNNC1, FRK, PDZK1, SLC2A8, TST, TFPI2, DNAJC1, ETFB, PAPSS2
HALLMARK_FATTY_ACID_METABOLISM	0.330827	0.413534	0.0684715	0.355053	1.07851	146	ALDH1A1, ALDH3A1, CD1D, CYP1A1, MAOA, CD36, INMT, REEP6, RDH16, SERINC1, TP53INP2, ACSL5, GABARAPL1, PTPRG
HALLMARK_G2M_CHECKPOINT	1.78593e-52	4.46483e-51	1.88726	-0.791527	-3.39921	196	TTK, AURKB, CDC20, PLK1, KIF2C, TROAP, BIRC5, LMNB1, UBE2C, CENPA, CDKN2C, NEK2, KIF4A, CENPF, CDK1, CDC45, RAD54L, CDKN3, PBK, BUB1, NUSAP1, MKI67, PRC1, KNL1, CCNB2, PLK4, PTTG1, NDC80, GINS2, MYBL2, CCNA2, HMMR, TOP2A, TACC3, MAD2L1, KIF20B, FBXO5, CENPE, KIF15, EZH2, TPX2, POLQ, ESPL1, CKS1B, KIF11, EXO1, MCM5, RACGAP1, H2AFZ, SMC4, TMPO, E2F2, MCM3, DBF4, TRAIP, BRCA2, KIF22, AURKA, MCM2, LB…
HALLMARK_GLYCOLYSIS	0.845912	0.863175	0.0223699	0.265416	0.816124	185	PKP2, AK4, TGFBI, ANGPTL4, IGFBP3, PLOD2, RRAGD, CHPF, GCLC, PAM, IDUA, GPC4, CD44, AK3, STC2, DPYSL4, COL5A1, MXI1, P4HA2, SDC3, PRPS1, CHPF2, PLOD1, B4GALT1, GFPT1, GPC1, P4HA1, HK2, CHST6, SDC2, TPST1, GLRX, AGRN, HS2ST1, FAM162A, B4GALT7, EXT2, QSOX1, B4GALT2, EXT1, XYLT2, SLC35A3
HALLMARK_HEDGEHOG_SIGNALING	0.245774	0.341352	0.0946646	0.46931	1.18145	33	L1CAM, SCG2, NRCAM, CELSR1, NKX6-1, CDK6
HALLMARK_HEME_METABOLISM	0.0347734	0.0620954	0.248911	0.429636	1.31956	175	C3, RAP1GAP, ANK1, TRIM58, MYL4, RHCE, FTCD, CLIC2, ENDOD1, DMTN, SLC22A4, OSBP2, SLC7A11, SLC2A1, GCLC, SNCA, BPGM, XK, ATP6V0A1, DAAM1, BTG2, ACSL6, LRP10, MXI1, P4HA2, SIDT2, MARCH2, HBD, HAGH, CCND3, BNIP3L, GDE1, YPEL5, BTRC, TRAK2, ALDH6A1, ATG4A, ERMAP, TMEM9B, NFE2L1, SYNJ1, ADIPOR1, RIOK3, HTATIP2, PPP2R5B, CTSB, OPTN, EZH1, AQP3, ABCG2, TFRC, SLC30A1, SLC10A3, MOSPD1, CCDC28A, HEBP1, HB…
HALLMARK_HYPOXIA	0.0502618	0.0866582	0.204295	0.417929	1.28564	186	AK4, TGFBI, IL6, ANGPTL4, PDGFB, HOXB9, PPP1R3C, F3, INHA, HS3ST1, SLC2A5, IGFBP3, RRAGD, RORA, CDKN1A, LOX, IDS, SLC2A1, KIF5A, NDRG1, PAM, GPC4, ATF3, DTNA, STC2, DPYSL4, COL5A1, GAA, MXI1, AMPD3, P4HA2, SDC3, ATP7A, TMEM45A, TGFB3, SCARB1, NEDD4L, KLHL24, BNIP3L, EFNA1, GPC1, P4HA1, HK2, ADM, SDC2, B4GALNT2, STBD1, GLRX, GBE1, CCNG2
HALLMARK_IL2_STAT5_SIGNALING	0.0642105	0.107018	0.179782	0.412239	1.26761	177	CCND2, CXCL10, CSF2, BMP2, PTH1R, ABCB1, APLP1, GPR65, MAP6, TIAM1, GBP4, DHRS3, SLC39A8, RRAGD, GPR83, RORA, MUC1, S100A1, IL1RL1, LIF, CDCP1, FGL2, NDRG1, TNFRSF21, AHR, PRNP, GABARAPL1, CD44, MXD1, SCN9A, SYNGR2, AKAP2, PRKCH, SPP1, CTSZ, CCND3, CD81, P4HA1, HK2, WLS, ITGAV, F2RL2, IFNGR1, NFKBIZ, NCOA3, IGF2R, TNFSF10, CAPN3
HALLMARK_IL6_JAK_STAT3_SIGNALING	0.000373431	0.00116697	0.498493	0.62436	1.76667	70	CXCL10, IL1B, EBI3, CXCL11, CSF2, IL6, CD14, CD36, ITGB3, CSF2RA, CXCL3, IL7, A2M, IL12RB1, LEPR, TNFRSF21, CD44, STAT1, OSMR, ACVRL1, IFNAR1, STAT3
HALLMARK_INFLAMMATORY_RESPONSE	1.77536e-09	1.47946e-08	0.788187	0.632941	1.93221	167	TNFSF15, IL1A, CD70, CXCL10, CCL20, IL1B, CCL2, CD40, EBI3, CXCL11, CMKLR1, RTP4, KCNJ2, CCR7, ICOSLG, IL6, CD14, OLR1, TNFSF9, KCNA3, CCL5, F3, EDN1, RASGRP1, ITGB3, CD82, C5AR1, INHBA, ABCA1, SGMS2, CDKN1A, ITGB8, DCBLD2, LIF, MSR1, EREG, IL18, PTGIR, SLC1A2, LAMP3, AHR, ROS1, TIMP1, RNF144B, BTG2, PVR, MXD1, OSMR, P2RY2, CYBB, TLR1, CD55, TLR3, IFNAR1
HALLMARK_INTERFERON_ALPHA_RESPONSE	0.00614151	0.0133511	0.407018	0.522401	1.52808	96	CXCL10, TXNIP, CXCL11, RTP4, IFIT2, IFI27, TMEM140, RSAD2, GBP4, C1S, IL7, IFI30, NCOA7, LAMP3, SAMD9L, TAP1, HLA-C, GBP2, IFIH1, HERC6, EPSTI1, ISG15, OASL, CCRL2, DHX58, BST2, IFIT3, TENT5A, B2M, MX1, CMPK2, IFITM3
HALLMARK_INTERFERON_GAMMA_RESPONSE	0.00182392	0.00434266	0.45506	0.498675	1.53324	182	CXCL10, CCL2, TXNIP, OAS2, CD40, CXCL11, CMKLR1, RTP4, VCAM1, IDO1, SLAMF7, IL6, CCL5, IFIT2, IFI27, RSAD2, ST3GAL5, GBP4, C1S, CDKN1A, IL7, HLA-B, HLA-G, FGL2, SOD2, SERPING1, IFI30, SAMD9L, BPGM, EIF4E3, BANK1, APOL6, STAT1, DDX58, TAP1, STAT3, IFIH1, HERC6, EPSTI1, PDE4B, ISG15, OASL, XAF1, NCOA3, TNFSF10, TOR1B, PTPN1, DHX58, BST2, ZNFX1, FAS, IFIT3, HIF1A, TAPBP, B2M, IRF5, SECTM1, IFIT1, MX…
HALLMARK_KRAS_SIGNALING_DN	0.000425551	0.00125162	0.498493	0.545259	1.64091	130	KRT4, H2AFY2, HTR1D, TG, TGFB2, CLDN16, P2RX6, THNSL2, CYP39A1, RGS11, WNT16, NR4A2, EDN1, EFHD1, PRODH, THRB, RSAD2, EPHA5, KCNMB1, IGFBP2, SCN10A, ARHGDIG, CCNA1, AKR1B10, FGF22, HSD11B2, SPTBN2, ADRA2C, IDUA, LYPD3, SYNPO, SHOX2, BTG2, PDK2, ITIH3, PTPRJ, RYR1, TENM2, COPZ2, MAST3, EGF, CAMK1D
HALLMARK_KRAS_SIGNALING_UP	4.99565e-06	2.49783e-05	0.610527	0.562182	1.72868	177	CCND2, APOD, CXCL10, MMP10, CCL20, IL1B, CMKLR1, HSD11B1, FGF9, CSF2, SERPINA3, TSPAN7, FUCA1, BMP2, SPON1, NAP1L2, ABCB1, ANGPTL4, RBP4, ITGBL1, CSF2RA, INHBA, SNAP25, GALNT3, TSPAN1, IGFBP3, ALDH1A2, DCBLD2, LIF, EREG, ANO1, BPGM, ANKH, CTSS, LAPTM5, HKDC1, MAP7, ITGB2, TRIB2, TNNT2, PLAU, VWA5A, SPP1, PLAT, TFPI, DUSP6, EPB41L3, TSPAN13, CDADC1, EVI5, ANXA10, JUP, PTPRR
HALLMARK_MITOTIC_SPINDLE	6.12906e-16	7.66132e-15	1.02767	-0.557942	-2.39267	198	TTK, PLK1, KIF2C, BIRC5, LMNB1, NEK2, KIF4A, CENPF, CDK1, DLGAP5, BUB1, NUSAP1, PRC1, CCNB2, NDC80, TOP2A, ANLN, KIF20B, FBXO5, CENPE, KIF15, TPX2, ESPL1, KIF11, RACGAP1, SMC4, BRCA2, KIF22, AURKA, CNTRL, KNTC1, DOCK2, INCENP, SASS6, SHROOM2, CENPJ, ECT2, ARHGEF2, TUBGCP3, ARAP3, PIF1, MID1IP1, EZR, CDC42EP4, CEP72, MARCKS, NET1, ARHGDIA, CEP131
HALLMARK_MTORC1_SIGNALING	0.00644467	0.0134264	0.407018	-0.304367	-1.30268	200	PLK1, BUB1, PHGDH, CORO1A, RRM2, DHFR, AURKA, MCM2, CCNF, DDX39A, ASNS, CDC25A, MCM4, FAM129A, ENO1, CACYBP, HMBS, PSAT1, PNP, SLC9A3R1, EBP, SHMT2, POLR3G, PSPH, SLC37A4, HSPE1, RRP9, TRIB3, TOMM40, GMPS, STIP1, SERPINH1, EEF1E1, HPRT1, TMEM97, DHCR24, PSMG1, SORD, GOT1, IDH1, UCHL5, CCT6A, PDAP1, GGA2, INSIG1, ELOVL6, NUP205, TUBG1, PPP1R15A, PSMC6, PSMD13, HSPD1, XBP1, CALR, PSMA4, MTHFD2, PIT…
HALLMARK_MYC_TARGETS_V1	4.28399e-33	7.13999e-32	1.49548	-0.700996	-3.02493	199	CDC20, CDC45, CCNA2, MCM7, MAD2L1, MCM5, H2AFZ, TYMS, MCM2, FBL, LSM2, RFC4, MCM6, MCM4, HNRNPA1, DEK, HNRNPD, RRM1, USP1, CDK2, MRPL23, U2AF1, SNRPD1, RANBP1, ILF2, CDK4, SNRPA, SRSF3, C1QBP, PHB2, RUVBL2, RPS2, MRPL9, KPNA2, SF3B3, EIF4A1, RPLP0, APEX1, HNRNPA2B1, POLD2, TRA2B, SNRPG, RPS3, IMPDH2, NME1, SET, DUT, HDGF, RPS6, HNRNPR, SRSF2, MYC, PCNA, NPM1, SNRPB2, CCT2, SRSF7, SRSF1, NHP2, RAC…
HALLMARK_MYC_TARGETS_V2	6.01642e-11	6.01642e-10	0.839089	-0.726181	-2.62256	58	PLK1, PLK4, MCM5, MCM4, MRTO4, CDK4, DCTPP1, NOP2, PPAN, MYC, NPM1, GRWD1, EXOSC5, HSPE1, PA2G4, RRP9, BYSL, NOP16, WDR74, NIP7, TBRG4, SLC19A1, PRMT3, NOP56, UTP20, PUS1, NOLC1, TCOF1, DUSP2, RABEPK, TMEM97, IPO4, SORD, CBX3, IMP4, RCL1, PES1, PHB, PPRC1, HSPD1, NOC4L, GNL3, FARSA
HALLMARK_MYOGENESIS	0.000298979	0.000996596	0.498493	0.516866	1.59105	178	IGF1, APOD, ACTN2, GPX3, SGCD, CAMK2B, IGFBP7, KCNH1, AEBP1, CD36, MYL3, PPP1R3C, CHRNA1, MYL4, SH3BGR, DMD, IGFBP3, ITGB5, PTP4A3, SORBS1, CDKN1A, ANKRD2, BDKRB2, MYBPH, ADAM12, TCAP, SVIL, COL3A1, PRNP, FGF2, COL4A2, ATP6AP1, MYOM2, MAPRE3, DTNA, STC2, SYNGR2, GAA, RYR1, TNNT2, HSPB8, MYH11, CTF1, SPARC, CLU, FOXO4, ADCY9, MYLK, TNNC1, APP, MRAS, DMPK, GABARAPL2
HALLMARK_NOTCH_SIGNALING	0.618734	0.693684	0.0486034	0.361407	0.900961	32	DTX1, WNT5A, JAG1, NOTCH3, DTX4, CCND1, ST3GAL6, HES1, ARRB1, NOTCH2, SKP1
HALLMARK_OXIDATIVE_PHOSPHORYLATION	8.51192e-05	0.000327381	0.538434	-0.360124	-1.54132	200	MAOB, MRPL11, FH, TIMM9, PHB2, SLC25A5, TOMM22, IDH3B, NDUFA9, ATP1B1, ATP5F1C, ATP5MC2, TIMM10, CS, COX7A2, MRPL15, LDHB, CYC1, NQO2, GOT2, MRPS15, SLC25A12, IDH1, MRPS11, ATP5PO, NDUFAB1, POLR2F, SLC25A3, TIMM13, DECR1, PHYH, SLC25A6, MRPS30, MRPS12, GPX4, NDUFS6, BAX, MGST3, NDUFB8, FXN, UQCRH, UQCRB, SLC25A11, NDUFC2, COX11, TIMM50, NDUFB6, RHOT2, ABCB7, SUCLG1, CYCS, COX7C, COX10, NDUFS3, SD…
HALLMARK_P53_PATHWAY	0.000128542	0.000459077	0.518848	0.51595	1.59485	196	IL1A, CCND2, CLCA2, TXNIP, INHBB, TCHH, JAG2, FUCA1, BMP2, TNFSF9, CYFIP2, HIST1H1C, CD82, CDKN2B, ABAT, CTSF, KRT17, ALOX15B, CDKN1A, SLC7A11, PERP, LIF, IFI30, STOM, DRAM1, ZMAT3, NDRG1, SAT1, ATF3, BTG2, TCN2, MXD1, RRAD, TSPYL2, MDM2, SERPINB5, VWA5A, TAP1, ADA, SESN1, CCND3, FBXW7, CD81, BLCAP, TM7SF3, KIF13B, PIDD1, COQ8A, ZNF365, NINJ1, APP, CTSD, FGF13, F2R, PDGFA, FAS, MXD4, ERCC5, ABHD4…
HALLMARK_PANCREAS_BETA_CELLS	0.712857	0.774845	0.0457704	0.358559	0.819879	19	DPP4, NKX6-1, STXBP1, VDR, FOXO1, LMO2, SRPRB, SPCS1
HALLMARK_PEROXISOME	0.267403	0.361356	0.0808589	0.388006	1.13268	94	ALDH1A1, ABCD2, ABCB1, CADM1, DHRS3, STS, HSD11B2, SOD2, ACSL5, CLN8, ABCB4
HALLMARK_PI3K_AKT_MTOR_SIGNALING	0.624315	0.693684	0.0396787	0.315182	0.923388	98	SLA, VAV3, FGF17, GNA14, TIAM1, CDKN1A, FGF22, SLC2A1, ITPR2, PIK3R3
HALLMARK_PROTEIN_SECRETION	0.127072	0.192533	0.126876	0.430352	1.25629	94	ABCA1, PAM, ATP7A, GALC, ADAM10, CLN5, YIPF6, DST, IGF2R, SCAMP1, TMED10, ERGIC3, VAMP3, STX12, ICA1, CAV2, ATP6V1H, LMAN1, ARFGEF1, KRT18, CLCN3, ATP6V1B1, BET1, OCRL, VAMP7, ARFIP1, STX7, VPS4B, USO1, SNX2, RAB22A, GLA, TMED2, SEC22B, TMX1, SGMS1, VAMP4, RER1, ARFGEF2, RAB5A, AP1G1, MON2, SOD1, SEC31A, LAMP2, KIF1B, AP3B1, STX16, SNAP23, COPB1
HALLMARK_REACTIVE_OXYGEN_SPECIES_PATHWAY	0.570208	0.663032	0.048799	0.351175	0.942187	49	GPX3, HHEX, SOD2, GCLC, PRNP, PDLIM1, GLRX, PRDX6, TXNRD1, MGST1
HALLMARK_SPERMATOGENESIS	3.84139e-06	2.1341e-05	0.610527	-0.499957	-1.95754	97	TTK, NCAPH, KIF2C, DCC, NEK2, CDK1, CDKN3, BUB1, CCNB2, EZH2, RPL39L, DBF4, AURKA, DMC1, RFC4, CAMK4
HALLMARK_TGF_BETA_SIGNALING	0.789474	0.829199	0.115734	-0.243075	-0.851483	53	ID1, ID3, ID2, SMAD6, CDKN1C, HDAC1, PPP1CA
HALLMARK_TNFA_SIGNALING_VIA_NFKB	6.09917e-05	0.000254132	0.557332	0.531306	1.64047	194	IL1A, CXCL10, CCL20, IL1B, CCL2, DUSP4, CXCL11, CSF2, KYNU, SLC16A6, BMP2, ICOSLG, IL6, OLR1, TNFSF9, CCL5, F3, NR4A2, IFIT2, EDN1, EGR2, INHBA, ABCA1, LAMB3, KLF9, JAG1, CXCL3, CDKN1A, PMEPA1, DNAJB4, LIF, SOD2, IL18, DRAM1, SAT1, ATF3, CD44, BTG2, MXD1, DDX58, PLAU, RCAN1, TAP1, CCND1, B4GALT1, IFIH1, EFNA1, IL23A, SERPINB2, TNIP1, SLC2A6, NFE2L2, NINJ1, PDE4B, NFAT5, GFPT2, CCRL2, SMAD3
HALLMARK_UNFOLDED_PROTEIN_RESPONSE	0.101644	0.158819	0.287805	-0.297334	-1.16603	112	CKS1B, H2AFX, ASNS, EIF4EBP1, EXOSC9, FUS, EXOSC2, PSAT1, ATF4, EIF4A1, CHAC1, BANF1, NPM1, EXOSC5, NHP2, DKC1, NFYA, RRP9, EXOSC10, NOP56, ZBTB17, EIF4A3, GEMIN4, NOLC1, KHSRP, RPS14, NFYB, CXXC1, ALDH18A1, DNAJA4, CEBPG, XBP1, CALR, EDC4, EXOSC1, MTHFD2, DCP1A, EIF4E, EEF2
HALLMARK_UV_RESPONSE_DN	0.176282	0.251832	0.102822	0.391765	1.18849	142	CACNA1A, KIT, F3, ITGB3, IGFBP5, CDON, KCNMA1, NFIB, SLC22A18, GJA1, COL3A1, COL5A2, EFEMP1, PMP22, PIK3R3, GRK5, PLCB4, TGFBR2, TFPI, PTPRM, DDAH1, SYNE1, MAP1B, PRKCE, SDC2, TJP1, ACVR2A, ARHGEF9, DAB2, MGMT, SMAD3, LAMC1, ADD3, KALRN, IGF1R, COL11A1, ERBB2, BDNF, ICA1, ATP2B4, COL1A1, CAP2, ATRN, NOTCH2, ATP2C1, LTBP1, RND3, COL1A2, SCHIP1, TOGARAM1, NEK7, PDGFRB, FYN, APBB2, ADGRL2, ATRX, AGG…
HALLMARK_UV_RESPONSE_UP	0.140725	0.206948	0.11725	0.398418	1.21286	150	MAPK8IP2, TCHH, GPX3, CYP1A1, BMP2, MAOA, IL6, ABCB1, NPTXR, MSX1, OLFM1, RASGRP1, CDKN2B, IGFBP2, SOD2, CYB5R1, CREG1, SHOX2, ATF3, BTG2, RRAD, TUBA4A, GAL, TAP1, CCND3
HALLMARK_WNT_BETA_CATENIN_SIGNALING	0.451531	0.537536	0.0617054	0.390904	1.00903	38	CCND2, JAG2, JAG1, NCSTN, GNAI1, HDAC11, ADAM17
HALLMARK_XENOBIOTIC_METABOLISM	0.00165568	0.0041392	0.45506	0.49229	1.51019	173	IGF1, ALDH3A1, RAP1GAP, ABCD2, HSD11B1, TGFB2, PTGDS, KYNU, CYP1A1, MAOA, TTPA, CD36, RBP4, CYFIP2, IGFBP4, VTN, CDA, SPINT2, SLC22A1, AKR1C3, CYP2S1, SLC46A3, GCLC, GABARAPL1, CYP2E1, CYP2J2, PINK1, PROS1, ENTPD5, AKR1C2, AOX1, JUP, NINJ1, ABCC2, TPST1, ITIH4, VNN1, SLC12A4, PGRMC1, FAS, PAPSS2

## Sheet: gsea_timecourse_RIS
pathway	pval	padj	log2err	ES	NES	size	leadingEdge
HALLMARK_ADIPOGENESIS	0.0424403	0.0684521	0.252961	0.341729	1.29465	193	C3, ABCA1, APOE, COL15A1, ITIH5, DNAJB9, SPARCL1, CCNG2, CD36, PPARG, SLC27A1, VEGFB, STAT5A, LAMA4, LTC4S, PLIN2, TOB1, CMBL, ECH1, EPHX2, PGM1, PDCD4, STOM, MYLK, PIM3, REEP6, SCARB1, LIFR, MAP4K3, BCL6, ALDH2, GPX4, ACADS, IFNGR1, PHYH, PQLC3, SQOR, CRAT, GBE1, GPX3, GADD45A, MCCC1, DRAM2
HALLMARK_ALLOGRAFT_REJECTION	0.00025465	0.000707361	0.498493	0.449856	1.65603	149	CCL11, IL16, IL6, CCR1, IL1B, ICAM1, GBP2, ICOSLG, C2, CCND2, CD7, CTSS, CCL5, LIF, WARS, HLA-DMA, KLRD1, IRF7, CD74, TLR1, ST8SIA4, IL12A, HDAC9, HLA-DMB, HLA-A, HLA-E, CD79A, B2M, IL2RB, AARS, TAP1, CDKN2A, TLR3, STAT4, HLA-G, F2R, DYRK3, PSMB10, IFNGR1, EGFR, BCL3, MAP4K1, ELANE, SOCS1, WAS, TGFB2, RPS19, NCK1, CD40, TPD52, RPL39, ACHE, RPS3A
HALLMARK_ANDROGEN_RESPONSE	0.0472779	0.0738718	0.248911	0.388218	1.35744	97	GUCY1A1, DNAJB9, NDRG1, ALDH1A3, MERTK, HSD17B14, SELENOP, SCD, IQGAP2, STEAP4, SAT1, MAF, ABCC4, PTK2B, TNFAIP8, MAP7, FADS1, B2M, SPDEF, LIFR, KRT8, SLC38A2, INSIG1, NGLY1, TSC22D1, INPP4B
HALLMARK_ANGIOGENESIS	0.0338462	0.0604396	0.30775	0.536255	1.53786	31	JAG2, VEGFA, POSTN, CXCL6, OLR1, CCND2, LUM, TNFRSF21, JAG1, VTN
HALLMARK_APICAL_JUNCTION	0.401544	0.478029	0.134273	-0.239967	-1.00499	187	ACTC1, CNTN1, COL17A1, CLDN4, AMIGO2, CD274, NEGR1, WNK4, CLDN14, YWHAH, LAMC2, SHROOM2, FLNC, CDH6, ACTB, MSN, TUBG1, ACTN4, VASP, FSCN1, NRXN2, FBN1, VCAN, MPP5, CAP1, ZYX, CDH4, PFN1, CLDN11, PIK3R3, ITGA3, ARPC2, CDH11, ACTN1, THY1
HALLMARK_APICAL_SURFACE	0.314843	0.393553	0.0886261	0.36458	1.09083	38	RHCG, SULF2, SLC2A4, GAS1, LYPD3, IL2RB, TMEM8B
HALLMARK_APOPTOSIS	0.00125934	0.00314835	0.45506	0.421433	1.55682	153	IL1A, DDIT3, IL6, IL1B, ATF3, BMP2, SOD2, PLAT, CCND2, BMF, HGF, BTG2, TGFBR3, LGALS3, SQSTM1, BNIP3L, SAT1, CLU, FDXR, CDKN1A, LUM, BCL2L11, CASP1, TNFSF10, CTH, ENO2, LEF1, SATB1, GCH1, PDCD4, TIMP3, ISG20, AIFM3, TAP1, PDGFRB, DCN, F2R, IGF2R, MMP2, IRF1, GPX4, DNAJC3, CASP9, IFNGR1, IER3, IFITM3, GPX3, TGFB2, GADD45A
HALLMARK_BILE_ACID_METABOLISM	0.0362845	0.0615385	0.287857	0.407201	1.40171	91	CH25H, ABCA1, SLC22A18, CYP27A1, SULT2B1, NR3C2, ABCA8, ABCA5, ABCA6, ABCA9, FDXR, PIPOX, OPTN, HSD3B7, PEX11G, ABCA3, NPC1, EPHX2, FADS1
HALLMARK_CHOLESTEROL_HOMEOSTASIS	0.0164854	0.0329707	0.352488	0.462115	1.53303	72	TRIB3, ATF3, PNRC1, SCD, SEMA3B, TP53INP1, ALDOC, LGALS3, FAM129A, CXCL16, PPARG, TM7SF2, NFIL3, CLU, CPEB2, CBS, ECH1, JAG1, FBXO6, ABCA2, SREBF2, CHKA
HALLMARK_COAGULATION	0.000241013	0.000707361	0.518848	0.482886	1.72761	115	C3, A2M, F11, CTSK, CFB, C1R, KLKB1, CTSH, C1S, DPP4, PLAT, OLR1, C2, MST1, SERPING1, PROS1, PDGFB, F10, P2RY1, SH2B2, CLU, VWF, APOC1, CFD, CPQ, MMP11, CTSO, TIMP3, ISCU, F8, DCT, CFH, MMP2, ACOX2, CASP9, MMP15, FYN, ANG
HALLMARK_COMPLEMENT	0.000153127	0.00053894	0.518848	0.446301	1.66653	174	CASP5, C3, IL6, CXCL1, CFB, C1R, MT3, KLKB1, CTSH, C1S, DPP4, PLAT, OLR1, C2, SERPING1, CTSS, HSPA5, CCL5, PDGFB, CD36, F10, LGALS3, PIM1, ACTN2, CEBPB, CLU, IRF7, CD55, CASP1, APOC1, CPQ, CBLB, PSMB9, APOBEC3G, PHEX, KCNIP3, CTSO, CTSD, F8, KCNIP2, TNFAIP3, IRF2, CFH, IRF1, CASP9, PDP1, F7, MMP15, CR2, FYN, ANG, PLSCR1
HALLMARK_DNA_REPAIR	7.92007e-05	0.000330003	0.538434	-0.418826	-1.68784	150	RAD51, ZWINT, RFC3, FEN1, PRIM1, POLA1, POLA2, PNP, RFC5, RFC4, RFC2, TYMS, LIG1, ALYREF, POLD1, POLD3, PCNA, DGCR8, ARL6IP1, HCLS1, AC139530.1, UMPS, POLR2D, RPA3, DUT, NME1, TAF13, HPRT1, CDA, SSRP1, RPA2, CSTF3, SF3A3, RAE1, NELFCD, POLR2F, GTF3C5, TAF1C, GTF2A2, ERCC2, POLR2K, SAC3D1, ADRM1, SRSF6, DGUOK, ITPA, RBX1, CLP1, CANT1, NUDT21, GTF2H3, POLR2A, UPF3B, MPC2
HALLMARK_E2F_TARGETS	5.14919e-60	2.5746e-58	2.01977	-0.824561	-3.50563	200	MYBL2, RRM2, ASF1B, E2F8, MKI67, SPC25, AURKB, LMNB1, TCF19, CDCA8, CDC25A, CDC20, TRIP13, PLK1, KIF18B, HELLS, BUB1B, TACC3, RFC3, RAD51AP1, CDK1, ESPL1, CDCA3, AURKA, TK1, SPC24, KIF4A, GINS3, CENPM, DSCC1, DEPDC1, MAD2L1, KIF2C, PLK4, ORC6, BIRC5, GINS1, CCNB2, MCM5, PSMC3IP, SPAG5, TOP2A, TMPO, ATAD2, DLGAP5, UBE2T, H2AFX, CDKN2C, MELK, HMMR, MCM4, RACGAP1, DIAPH3, CENPE, MCM6, MCM3, BRCA2, S…
HALLMARK_EPITHELIAL_MESENCHYMAL_TRANSITION	0.00903152	0.0188157	0.38073	-0.32433	-1.36189	195	MFAP5, ELN, IGFBP3, RGS4, CXCL12, CDH2, PCOLCE2, SERPINE1, CRLF1, MCM7, TPM1, THBS1, PLAUR, FOXC2, SDC1, COL1A1, COL4A1, INHBA, PTHLH, OXTR, FSTL1, ID2, RHOB, LAMC2, MMP1, FSTL3, CDH6, GADD45B, VEGFC, COL4A2, GLIPR1, NT5E, P3H1, ADAM12, TNFRSF12A, DKK1, FBN1, VCAN, MATN3, TAGLN, EDIL3, CD59, ANPEP, SPARC, ITGA5, COLGALT1, GREM1, FZD8, MSX1, CALU, SLIT3
HALLMARK_ESTROGEN_RESPONSE_EARLY	0.0171597	0.0329995	0.352488	0.367367	1.38256	186	DHRS3, ELF3, PTGES, CALB2, GREB1, HR, TBC1D30, BHLHE40, KLF4, SULT2B1, TTC39A, SEMA3B, STC2, RETREG1, CELSR1, THSD4, LRIG1, ALDH3B1, MPPED2, AQP3, RPS6KA2, SVIL, SYBU, SYNGR1, TOB1, MUC1, MAPT, ABCA3, SLC1A4, OPN3, RET, NBL1, GAB2, SCARB1, XBP1, BCL2, KRT8, MINDY1, SLC1A1, KDM4B, BLVRB, SH3BP5, CYP26B1, RHOD, NADSYN1, IL6ST, SLC22A5, WFS1, BAG1, TPBG, TUBB2B, GJA1, CA12, ABAT, SLC2A1, SIAH2, TSKU…
HALLMARK_ESTROGEN_RESPONSE_LATE	0.0551471	0.0810986	0.376039	-0.304357	-1.26296	174	CDC20, GINS2, CXCL12, KIF20A, PLK4, STIL, MYB, TOP2A, FGFR3, FKBP5, SFN, CDC6, FOS, RNASEH2A, XRCC3, TSPAN13, EMP2, TFAP2C, FABP5, GAL, ID2, LAMC2, PRSS23, PTGER3, DUSP2, PPIF, PRLR, SGK1, HPRT1, ITPK1, SOX3, SERPINA1, PGR, NXT1, CCND1, GLA, RBBP8, PAPSS2, IDH2, FLNB, PRKAR2B, DHRS2, ELOVL5, LSR, TRIM29, FKBP4, CDH1
HALLMARK_FATTY_ACID_METABOLISM	0.990331	0.990331	0.0287155	0.19002	0.696988	145	GABARAPL1, IL4I1, INMT, CD36, VNN1, LTC4S, PPARA, ENO2, UBE2L6, AUH, ECH1, HMGCL, REEP6, ADH1C, HSD17B11, RDH16, TDO2, ACADS, D2HGDH, SLC22A5, PSME1, CRAT
HALLMARK_G2M_CHECKPOINT	7.09135e-51	1.77284e-49	1.85963	-0.793478	-3.34397	196	E2F2, MYBL2, CDC45, MKI67, RAD54L, AURKB, LMNB1, POLQ, EXO1, CDC25A, CDC20, GINS2, CCNA2, PLK1, KNL1, TACC3, CDK1, ESPL1, KIF11, AURKA, KIF4A, TROAP, PBK, E2F1, MAD2L1, PRC1, NUSAP1, KIF2C, PLK4, TPX2, STIL, ORC6, NDC80, BIRC5, CCNB2, MCM5, CCNF, UBE2C, TOP2A, CENPA, CDC7, TMPO, H2AFX, TTK, BUB1, CDKN2C, HMMR, KIF15, KIF20B, RACGAP1, CENPF, CENPE, MCM6, MCM3, NEK2, BRCA2, SMC4, POLA2, BARD1, TRAI…
HALLMARK_GLYCOLYSIS	0.101604	0.141117	0.159647	0.321781	1.21532	190	RRAGD, DDIT4, MIOX, ELF3, MXI1, VEGFA, GAL3ST1, MERTK, EFNA3, AK4, HSPA5, STC2, HK2, SPAG4, FAM162A, CACNA1H, VLDLR, PPFIA4, GNPDA1, IDUA, AC074143.1, CTH, ENO2, DPYSL4, AK3, LHPP, GCLC, ERO1A, ISG20, IRS2, ANKZF1, DCN, ABCB6, ADORA2B, GPR87, RBCK1, MPI, EGFR, PC, IER3, P4HA1, TPBG, ANG, P4HA2, SRD5A3, GYS2, ZNF292, PAM, PDK3, QSOX1, GLRX
HALLMARK_HEDGEHOG_SIGNALING	0.0369231	0.0615385	0.294067	0.525726	1.52398	33	VEGFA, SCG2, L1CAM, CELSR1, VLDLR, NRCAM, ETS2, PTCH1, SLIT1, LDB1, ACHE, HEY1, ADGRG1, CRMP1, TLE1, PLG, DPYSL2
HALLMARK_HEME_METABOLISM	0.000161682	0.00053894	0.518848	0.446339	1.66637	176	C3, HBD, MXI1, CLIC2, SNCA, RAP1GAP, SLC6A9, FN3K, BTG2, HBQ1, EPB41, MOCOS, MOSPD1, ACP5, BNIP3L, OSBP2, ALDH6A1, AQP3, SLC6A8, SDCBP, BACH1, OPTN, ERMAP, FTCD, MARCH8, ASNS, GYPC, CTNS, KDM7A, GCLC, CLCN3, EZH1, YPEL5, LPIN2, GYPA, KLF3, DCAF10, ABCB6, EPOR, TCEA1, BLVRB, FBXO34, ICAM4, DMTN, PC, NFE2, HEBP1, P4HA2, CIR1, NUDT4, MKRN1, SLC2A1, DAAM1, BCAM, MFHAS1, CCDC28A, SLC11A2, ANK1, TFDP2,…
HALLMARK_HYPOXIA	3.59131e-09	2.56522e-08	0.774939	0.534344	2.01131	184	RRAGD, DDIT3, DDIT4, IL6, MXI1, ACKR3, CDKN1C, ATF3, KLHL24, VEGFA, PNRC1, PPARGC1A, RORA, NDRG1, PPP1R3C, BHLHE40, CCNG2, EFNA3, EFNA1, SULT2B1, AK4, DTNA, HSPA5, PDGFB, ALDOC, STC2, HK2, PIM1, FAM162A, BNIP3L, VLDLR, NFIL3, GAA, PPFIA4, SLC2A3, CDKN1A, KDM3A, GCK, ENO2, ADM, INHA, SLC2A5, AMPD3, PLIN2, DPYSL4, LXN, PGM1, RBPJ, BTG1, ERO1A, ISG20, IRS2, SCARB1, HEXA, BCL2, ANKZF1, TNFAIP3, DCN, …
HALLMARK_IL2_STAT5_SIGNALING	0.00374243	0.00850551	0.431708	0.389998	1.46034	179	CXCL10, RRAGD, DHRS3, FGL2, CDKN1C, ITIH5, BMP2, RORA, GUCY1B1, NDRG1, BHLHE40, CCND2, GABARAPL1, HK2, PIM1, LRIG1, CDCP1, MXD1, LIF, SLC29A2, NFIL3, SLC2A3, TNFSF10, PTH1R, PLIN2, MUC1, NFKBIZ, CSF2, IL18R1, SMPDL3A, FLT3LG, TNFRSF21, P2RX4, ANXA4, IL2RB, TTC39B, XBP1, BCL2, TNFRSF1B, IGF2R, RGS16, GPX4, PTCH1, SYT11, IFNGR1, P4HA1, IFITM3, PLSCR1, TNFRSF18, PRNP
HALLMARK_IL6_JAK_STAT3_SIGNALING	0.000174554	0.000545483	0.518848	0.55611	1.84485	72	CXCL10, INHBE, CXCL11, IL6, A2M, CCR1, IL1B, CXCL1, CXCL3, CD36, PIM1, EBI3, IRF9, CSF2, IL18R1, ACVRL1, TNFRSF21, LEPR, TNFRSF1B, IRF1, IFNGR1, IL6ST
HALLMARK_INFLAMMATORY_RESPONSE	1.16395e-05	5.29068e-05	0.593325	0.472471	1.75253	167	CXCL10, CCL20, TNFSF15, IL1A, CXCL11, IL6, LAMP3, ABCA1, BST2, P2RX7, IL1B, CXCL8, ITGB8, ICAM1, CXCL6, ICOSLG, IFITM1, RTP4, OLR1, NAMPT, MSR1, KCNJ2, KCNMB2, BTG2, CCL5, KCNA3, MXD1, LIF, EBI3, CDKN1A, CD70, IRF7, CYBB, CD55, TNFSF10, C5AR1, TLR1, ADM, BEST1, GCH1, SLC1A2, FZD5, IL18R1, PDPN, P2RX4, CD82, IRAK2, IL2RB, TNFSF9, HRH1, BDKRB1, TLR3, TNFRSF1B, SEMA4D
HALLMARK_INTERFERON_ALPHA_RESPONSE	7.96999e-11	6.64165e-10	0.839089	0.658858	2.30175	95	CXCL10, RSAD2, CXCL11, LAMP3, BST2, MX1, TMEM140, IFIT2, C1S, GBP2, IFITM1, RTP4, IFIH1, DHX58, EPSTI1, IFI44L, NCOA7, WARS, HERC6, BATF2, IRF7, UBA7, IRF9, CMPK2, IFIT3, CASP1, LGALS3BP, CD74, UBE2L6, TENT5A, PSMB9, PSMB8, B2M, ISG20, TAP1, IFI30, IFI27, IRF2, HLA-C, IFI35, GMPR, IRF1, PARP14, HELZ2, DDX60, IFITM3, PLSCR1, PSME1
HALLMARK_INTERFERON_GAMMA_RESPONSE	2.32089e-11	2.32089e-10	0.863415	0.568266	2.1361	182	VCAM1, CXCL10, RSAD2, CXCL11, FGL2, IL6, BST2, OAS2, MX1, CFB, C1R, SOD2, IFIT2, ICAM1, C1S, RTP4, NAMPT, XAF1, SERPING1, IFIH1, DHX58, HLA-B, CCL5, EPSTI1, PIM1, IFI44L, SECTM1, WARS, IDO1, HLA-DMA, CDKN1A, HERC6, BATF2, IRF7, ST3GAL5, APOL6, IRF9, IFIT1, CMPK2, IFIT3, CASP1, TNFSF10, LGALS3BP, CD74, ST8SIA4, GCH1, UBE2L6, MX2, PSMB9, HLA-A, PSMB8, BTG1, B2M, IL2RB, EIF4E3, ISG20, TAP1, PTGS2, I…
HALLMARK_KRAS_SIGNALING_DN	0.048951	0.0741683	0.24134	0.362508	1.31392	134	RSAD2, THRB, MX1, TG, P2RX6, HSD11B2, SELENOP, PRKN, CAMK1D, NR4A2, BTG2, IGFBP2, RGS11, IFI44L, LYPD3, YPEL1, PDE6B, MTHFR, MYO15A, GRID2, IDUA, MFSD6, RYR1, SNCB, PRODH, UPK3B, THNSL2, SYNPO, KCND1, NR6A1, CLSTN3, MAST3, MAGIX, PDK2, COQ8A, FGGY, CCDC106, SLC25A23, CLDN16, PLAG1, KCNN1
HALLMARK_KRAS_SIGNALING_UP	0.000113982	0.000438393	0.538434	0.434043	1.62332	178	CXCL10, TMEM176A, TMEM176B, CCL20, APOD, GUCY1A1, HSD11B1, ALDH1A2, IL1B, GPNMB, GPRC5B, CFB, BMP2, SERPINA3, ALDH1A3, SPARCL1, PLAT, CCND2, KLF4, TMEM100, CTSS, IL33, SEMA3B, CPE, FGF9, VWA5A, HKDC1, LIF, TMEM158, MAFB, LY96, TFPI, GYPC, SATB1, SPON1, HDAC9, F2RL1, TNNT2, ZNF277, ADGRA2, CSF2, MAP7, PSMB8, MMP11, JUP, ERO1A, PTGS2, PCSK1N, TNFRSF1B, TNFAIP3
HALLMARK_MITOTIC_SPINDLE	1.36834e-12	1.71042e-11	0.91012	-0.547777	-2.3166	198	LMNB1, PLK1, CDK1, ESPL1, KIF11, AURKA, ANLN, KIF4A, PRC1, NUSAP1, KIF2C, TPX2, NDC80, BIRC5, CCNB2, TOP2A, DLGAP5, TTK, BUB1, KIF15, KIF20B, RACGAP1, CENPF, CENPE, NEK2, BRCA2, SMC4, KIF22, INCENP, FBXO5, KNTC1, CENPJ, ECT2, SASS6, CNTRL, SMC1A, DOCK2, SHROOM2, PIF1, CEP72, EZR, PDLIM5, ACTN4, NET1, TUBD1, FSCN1, SORBS2, GEMIN4, MAPRE1, PCNT, SUN2, PREX1, RAPGEF6, ARHGDIA, TUBGCP3, CKAP5, CCDC88…
HALLMARK_MTORC1_SIGNALING	0.428005	0.48637	0.0659816	0.265649	1.01062	199	DDIT3, DDIT4, FGL2, TRIB3, NUPR1, BHLHE40, SLA, NAMPT, SCD, AK4, BTG2, HSPA5, HK2, FAM129A, SQSTM1, SYTL2, IGFBP5, TM7SF2, VLDLR, NFIL3, WARS, SLC2A3, FDXR, CCNG1, CDKN1A, ASNS, CTH
HALLMARK_MYC_TARGETS_V1	3.37866e-23	5.6311e-22	1.24623	-0.653451	-2.77326	199	CDC45, CDC20, CCNA2, MAD2L1, MCM5, MCM4, MCM6, CTPS1, CDK2, KPNA2, MCM7, H2AFZ, MCM2, RFC4, TYMS, RRM1, HNRNPA2B1, USP1, POLE3, SRSF2, RANBP1, HNRNPD, HNRNPR, SNRPD1, TFDP1, SRSF1, SNRPA1, PCNA, BUB3, CCT5, HNRNPA3, SRSF7, CSTF2, TARDBP, TRA2B, DEK, LSM2, ABCE1, NOP56, NOP16, EIF4E, DUT, SRM, PA2G4, G3BP1, ILF2, PPM1G, PSMB2, NME1, DDX21, PSMD14, RAN, EIF1AX, PSMD1, HSPE1, C1QBP, GOT2, NOLC1, SNR…
HALLMARK_MYC_TARGETS_V2	1.14457e-06	5.72283e-06	0.643552	-0.65866	-2.31727	58	PLK1, PLK4, MCM5, MCM4, MRTO4, SLC19A1, TMEM97, GRWD1, NIP7, DCTPP1, NOP56, PUS1, DUSP2, NOP16, SRM, PA2G4, UTP20, NOC4L, NOP2, BYSL, HSPE1, NOLC1, RRP9, MYBBP1A, DDX18, HSPD1, PPRC1, RRP12, LAS1L, PPAN, TCOF1, PHB, NDUFAF4, TBRG4, FARSA, TFB2M, AIMP2, UNG, IPO4, MPHOSPH10, IMP4, PRMT3, CBX3
HALLMARK_MYOGENESIS	0.000755335	0.00198772	0.477271	0.417677	1.55963	175	PTGIS, APOD, COL15A1, BDKRB2, CKMT2, PPP1R3C, BHLHE40, SCD, DTNA, KCNH2, PTP4A3, HRC, SOD3, CD36, STC2, FABP3, SH3BGR, ACTN2, CACNA1H, TNNC1, GAA, PPFIA4, CLU, SLC6A8, CDKN1A, SVIL, RYR1, FXYD1, DAPK2, TCAP, CFD, TNNT2, MEF2A, FOXO4, ITGB4, MYL3, SGCD, CAMK2B, MYLK, MYBPH, FHL1, DES, SPDEF, CTF1, COX7A1, CHRNA1, COL6A2, EIF4A2, ACTN3, KLF5, OCEL1, PC, BAG1, CSRP3, PYGM, PRNP, SGCA, CRAT, GPX3, TN…
HALLMARK_NOTCH_SIGNALING	0.414373	0.481829	0.0749279	0.353386	1.0168	32	WNT2, FZD5, JAG1, DTX4, ARRB1, DLL1
HALLMARK_OXIDATIVE_PHOSPHORYLATION	0.559184	0.594876	0.114751	-0.228095	-0.969749	200	ATP1B1, CYCS, TIMM10, FH, GOT2, MRPL35, CS, NDUFC2, MRPS11, SLC25A5, MRPL15, FXN, NDUFS6, PMPCA, IDH3A, VDAC3, IDH2, PDHA1, SLC25A20, POLR2F, ATP5MC1, TIMM17A, DLAT, TIMM13, GRPEL1, MRPS12, HSD17B10, TIMM50, TOMM22, HCCS, MTRR, LDHA, ATP5MF, ATP5MC3, UQCRFS1, IDH3B, MRPL11, NDUFB3, TIMM8B, OGDH, SUCLA2, AIFM1, MFN2, COX17, ATP5F1B, PDHB, CYC1, NDUFA8, COX11, ACADVL, NDUFA9, SUCLG1, MPC1, NDUFS1, …
HALLMARK_P53_PATHWAY	1.57654e-07	9.85337e-07	0.690132	0.504238	1.91705	195	CLCA2, IL1A, DDIT3, DDIT4, TRIB3, JAG2, ATF3, BMP2, NUPR1, NDRG1, RRAD, CCND2, KLF4, BTG2, CDKN2B, CEBPA, SLC3A2, CYFIP2, CTSF, VWA5A, TCN2, ALOX15B, FAM162A, HIST3H2A, MXD1, LIF, SAT1, MKNK2, FDXR, CCNG1, CDKN1A, DRAM1, CASP1, NINJ1, ABHD4, PIDD1, KIF13B, TOB1, ITGB4, ZFP36L1, RHBDF2, VDR, CD82, STOM, RNF19B, CTSD, EPS8L2, BTG1, ZMAT3, TP53, TNFSF9, SESN1, HIST1H1C, TAP1, RALGDS, ISCU, CDKN2A, T…
HALLMARK_PANCREAS_BETA_CELLS	0.089404	0.12772	0.191892	0.539716	1.3663	19	PCSK2, DPP4, GCK, MAFB, VDR, STXBP1
HALLMARK_PEROXISOME	0.189928	0.249905	0.11725	0.335058	1.15831	92	DHRS3, ESR2, SOD2, HSD11B2, SULT2B1, CADM1, CRABP2, HSD3B7, ECH1, HMGCL, EPHX2, FADS1, DLG4, HSD17B11
HALLMARK_PI3K_AKT_MTOR_SIGNALING	0.501629	0.557365	0.10714	-0.254076	-0.967551	98	VAV3, CDK1, E2F1, SFN, CDK2, PITX2, MAP2K3, CFL1, UBE2N, EIF4E, YWHAB, ACTR2, ARHGDIA, PFN1, TRAF2, PPP2R1B, PPP1CA, PIK3R3, AKT1, MYD88, MAPK8, ACTR3, PAK4, CAB39, NGF, AP2M1, RAC1, RALB, TIAM1
HALLMARK_PROTEIN_SECRETION	0.985816	0.990331	0.0302754	0.187266	0.654156	94	ABCA1, SH3GL2, BNIP3, SNX2, CLCN3, SCAMP1, IGF2R, EGFR, RAB9A, STX7, PAM, TPD52, ATP7A, YIPF6, GOLGA4, VAMP4, ATP6V1B1, USO1, BET1, ARFGEF2, ARFGEF1, ADAM10, SSPN, GALC
HALLMARK_REACTIVE_OXYGEN_SPECIES_PATHWAY	0.868827	0.905028	0.0402478	0.24133	0.751343	49	SOD2, MBP, FTL, GCLC, GPX4, PRNP, GPX3, GLRX, ABCC1
HALLMARK_SPERMATOGENESIS	0.00645032	0.0140224	0.407018	-0.399137	-1.5323	103	CDK1, AURKA, DMC1, NCAPH, KIF2C, CCNB2, TTK, BUB1, NEK2, CDKN3, EZH2, RFC4, DBF4, DMRT1, RPL39L, PARP2, TOPBP1
HALLMARK_TGF_BETA_SIGNALING	0.0182568	0.033809	0.352488	-0.440167	-1.53555	53	ID3, ID1, SERPINE1, THBS1, SMAD6, ID2, LTBP2, SMAD7, ENG, FURIN, SKIL, PPP1CA, RHOA, SMURF2, KLF10, BCAR3, CDH1, SLC20A1
HALLMARK_TNFA_SIGNALING_VIA_NFKB	7.83124e-07	4.35069e-06	0.659444	0.488699	1.85145	193	CXCL10, EGR2, CCL20, IL1A, CXCL11, IL6, ABCA1, ACKR3, IL1B, ATF3, VEGFA, CXCL1, CEBPD, PNRC1, SLC16A6, BMP2, SOD2, IFIT2, ICAM1, CXCL6, DUSP4, ICOSLG, OLR1, BHLHE40, CXCL3, NAMPT, KLF4, EFNA1, IFIH1, KLF9, MSC, NR4A2, BTG2, CCL5, SIK1, SQSTM1, MXD1, LIF, CEBPB, PTX3, NFIL3, RELB, SAT1, SLC2A3, STAT5A, LITAF, CDKN1A, DRAM1, NINJ1, BCL2A1, KDM6B, GCH1, F2RL1, CSF2, TNFAIP8, NFKBIE, RNF19B, JAG1, BT…
HALLMARK_UNFOLDED_PROTEIN_RESPONSE	0.355207	0.433179	0.0793435	0.297764	1.05664	111	DDIT4, ATF3, VEGFA, DNAJB9, HERPUD1, HSPA5, STC2, CEBPB, ERN1, IFIT1, ASNS, WIPI1, SLC1A4, CEBPG, ERO1A, TSPYL2, XBP1, XPOT, HYOU1, ATF4, EIF4A2, DNAJC3, WFS1, MTHFD2, EEF2, EIF2AK3, PSAT1
HALLMARK_UV_RESPONSE_DN	0.514563	0.559308	0.059476	0.268679	0.981294	142	DBP, KIT, CDON, BHLHE40, SLC22A18, TGFBR3, PPARG, RND3, IGFBP5, VLDLR, MAGI2, TFPI, KALRN, MAP2K5, COL11A1, CELF2, PHF3, PRKCE, ANXA4, GRK5, PTPRM, PDGFRB, ADORA2B, PTEN, INSIG1, TOGARAM1, SMAD3, RBPMS, FYN, PMP22, INPP4B, GJA1, CACNA1A
HALLMARK_UV_RESPONSE_UP	0.106996	0.144589	0.157403	0.32751	1.21038	154	IL6, CDKN1C, ATF3, BMP2, SOD2, FGF18, RRAD, ICAM1, CCK, BTG2, CDKN2B, KCNH2, IGFBP2, SQSTM1, NKX2-5, CREG1, AQP3, SLC6A8, BCL2L11, ASNS, ENO2, GCH1, CEBPG, GRINA, NPTXR, RET, BTG1, LHX2, TAP1, MAPK8IP2, DLG4, ATP6V1C1, PLCL1
HALLMARK_WNT_BETA_CATENIN_SIGNALING	0.218891	0.280629	0.110565	0.395139	1.18227	38	JAG2, CCND2, LEF1, DVL2, RBPJ, JAG1, HDAC11, TP53, AXIN2, PTCH1, AXIN1, ADAM17, HEY1, HDAC5, DLL1, FRAT1, GNAI1
HALLMARK_XENOBIOTIC_METABOLISM	0.0024943	0.00593881	0.431708	0.407794	1.51694	170	TMEM176B, PTGES, F11, PTGDS, HSD17B2, APOE, HSD11B1, CFB, RAP1GAP, CYP27A1, FMO3, GABARAPL1, PROS1, CYFIP2, CD36, F10, AKR1C3, VNN1, HGFAC, AKR1C2, NINJ1, GCH1, CYP26A1, ECH1, NPC1, JUP, GCLC, HES6, FBLN1, ADH1C, ETS2, LPIN2, VTN, ALDH2, TDO2, BLVRB, SLC46A3, ACOX2, PSMB10, ABCC3, PC, MAN1A1

## Sheet: gsea_timecourse_CD
pathway	pval	padj	log2err	ES	NES	size	leadingEdge
HALLMARK_ADIPOGENESIS	0.00751669	0.0170834	0.407018	0.38272	1.40826	192	C3, CD36, ABCA1, LAMA4, ITIH5, REEP6, APOE, NABP1, GPX3, PDCD4, LPCAT3, ANGPTL4, SQOR, DNAJB9, EPHX2, ITGA7, SULT1A1, ACADS, CCNG2, DHRS7B, TST, MYLK, SCARB1, ALDH2, RETSAT, SLC27A1, MIGA2, MCCC1, ADCY6, CRAT, FABP4, ETFB, LIFR, UQCR11, REEP5, VEGFB, DDT, RMDN3, PPARG, MARC2, STOM, STAT5A, SLC25A1, DRAM2
HALLMARK_ALLOGRAFT_REJECTION	0.0191608	0.0399183	0.352488	0.401358	1.4122	142	CCL2, CCND2, NLRP3, GBP2, IL16, ICAM1, IL12A, TLR3, TGFB2, LIF, HLA-DMA, C2, WAS, SOCS1, IL1B, IL6, CTSS, HLA-E, F2R, GPR65, CD74, THY1, HDAC9, KLRD1, CD4, B2M, TIMP1, STAT1, STAT4, APBB1
HALLMARK_ANDROGEN_RESPONSE	0.741877	0.789231	0.0546808	0.258752	0.86613	97	SELENOP, NDRG1, SAT1, DNAJB9, ABCC4, HSD17B14, MAP7, IQGAP2, CCND1, SPCS3, LIFR, GPD1L, CDK6, B2M, TSC22D1, HOMER2, TNFAIP8, PTK2B, ACSL3
HALLMARK_ANGIOGENESIS	0.061144	0.109186	0.257206	0.533079	1.42794	30	OLR1, CCND2, VTN, JAG2, TNFRSF21, LUM, JAG1, COL3A1, VEGFA, LRPAP1, POSTN, TIMP1
HALLMARK_APICAL_JUNCTION	0.328744	0.432557	0.0940503	0.288719	1.04829	182	VCAM1, NRTN, CALB2, ICAM1, AMIGO1, LAMA3, TMEM8B, ADAMTS5, KCNH2, TNFRSF11B, JUP, ATP1A3, VWF, LDLRAP1, PIK3R3, CERCAM, MAPK11, THY1, SDC3, MADCAM1, GAMT, CRAT, ADAM15, TSPAN4, LAYN, CD34, PARD6G, NLGN2, MYL9, CDH15, MPZL1, THBS3, RRAS, ADAM23, CD99, RHOF, TGFBI, SKAP2, LAMC2, TSC1
HALLMARK_APICAL_SURFACE	0.486188	0.578795	0.0762797	0.342418	0.980774	40	TMEM8B, SLC2A4, MDGA1, SLC34A3, LYPD3, ATP8B1, DCBLD2, ATP6V0A4, GSTM3, THY1, SRPX, GAS1
HALLMARK_APOPTOSIS	0.0448276	0.0862069	0.282013	0.365405	1.29368	147	TXNIP, CCND2, PLAT, SOD2, TGFB2, HGF, GPX3, CLU, CD14, BNIP3L, IL1B, PDCD4, IL6, LUM, BMF, SAT1, BMP2, ATF3, DCN, TIMP3, IFITM3, F2R, TGFBR3, CCND1, GCH1, PEA15, SQSTM1, RETSAT, TIMP2, SATB1, BCAP31, TSPO, TIMP1, CD44, DAP, DDIT3, IGF2R, PSEN2, FEZ1, APP, GSN
HALLMARK_BILE_ACID_METABOLISM	0.00833245	0.018114	0.38073	0.453253	1.50235	94	ABCA8, ABCA1, HSD17B6, ABCA3, SLC22A18, PIPOX, ABCA4, EPHX2, NR3C2, ACSL5, CYP8B1, MLYCD, ABCA5, PEX7, ABCA9, RETSAT, OPTN, CYP27A1, PEX19, ABCA2, CYP46A1, HSD17B11, CROT, PRDX5, PEX11G, CH25H, BMP6, ALDH8A1, ABCA6, SCP2
HALLMARK_CHOLESTEROL_HOMEOSTASIS	0.867041	0.884736	0.0491928	0.249022	0.79061	71	CLU, PNRC1, LGMN, FBXO6, CD9, JAG1, ATF3, PCYT2, TM7SF2, TP53INP1, ACSS2, ABCA2
HALLMARK_COAGULATION	5.34625e-06	3.81875e-05	0.610527	0.562264	1.92571	112	C3, A2M, OLR1, C1S, DPP4, PLAT, COMP, SERPING1, MMP15, C2, CLU, C9, F10, C1R, VWF, LGMN, CTSO, PROS1, CPQ, F2RL2, MST1, CD9, F3, DCT, PRSS23, S100A1, DUSP6, TIMP3, CFB, F8, SPARC, GP1BA, ANG, KLKB1, ISCU, CTSB
HALLMARK_COMPLEMENT	0.00716169	0.0170516	0.407018	0.393261	1.42262	176	C3, CD36, OLR1, C1S, DPP4, PLAT, SERPING1, MMP15, C2, CLU, KCNIP3, C9, WAS, F10, IL6, CTSS, C1R, LGMN, CTSO, CPQ, F3, DUSP6, CFB, F8, CASP10, DUSP5, TIMP2, GP1BA, ANG, CTSD, PRSS36, KLKB1, PRCP, CTSB, CD46, PHEX, TIMP1
HALLMARK_DNA_REPAIR	4.47058e-05	0.000223529	0.557332	-0.492139	-1.79299	147	ZWINT, RFC3, TYMS, RAD51, POLA1, LIG1, RFC2, FEN1, RFC4, POLD1, SSRP1, RFC5, POLD3, POLA2, RPA3, ALYREF, PCNA, PNP, NT5C, DUT, NME1, CDA, TAF6, ZNRD1, ITPA, DGCR8, RAE1, ARL6IP1, HPRT1, SF3A3, TAF1C, POLR2D, UMPS, GTF3C5, TARBP2, AC139530.1, POLR1C, NUDT21, ERCC8, GSDME, BOLA2, IMPDH2, DDB2, RBX1, NELFCD, UPF3B, SRSF6, SAC3D1, NELFE, POLR2C, NELFB, POLR2G
HALLMARK_E2F_TARGETS	3.56507e-58	1.78254e-56	1.98877	-0.860019	-3.25269	193	CDC20, MKI67, KIF18B, DLGAP5, BIRC5, KIF2C, PLK1, LMNB1, BUB1B, AURKB, TK1, MYBL2, CDKN2C, SPC25, CENPM, SPAG5, CDCA8, PLK4, RAD51AP1, CDCA3, E2F8, CCNB2, CENPE, TACC3, CDKN3, ASF1B, TCF19, EZH2, SPC24, PTTG1, MAD2L1, ESPL1, TRIP13, SMC4, CIT, PSMC3IP, MCM5, RACGAP1, MELK, MCM7, BRCA2, RFC3, RNASEH2A, TMPO, MCM2, BARD1, CKS1B, HELLS, H2AFZ, GINS1, TIMELESS, UBE2T, DSCC1, ATAD2, DDX39A, KIF22, MCM…
HALLMARK_EPITHELIAL_MESENCHYMAL_TRANSITION	0.10034	0.161839	0.183024	0.32581	1.20076	197	VCAM1, MGP, SCG2, FMOD, COMP, IGFBP2, LAMA3, NNMT, PVR, FUCA1, TNFRSF11B, IGFBP4, DAB2, IL6, LUM, MEST, COL11A1, SAT1, CADM1, QSOX1, SFRP1, LOX, DCN, TIMP3, SERPINE2, NID2, SNTB1, COL3A1, TGFBR3, THY1, SGCD, MYLK, TGM2, VEGFA, SPARC, WNT5A, APLP1, SLC6A8, PMP22, GAS1, COL1A2, GJA1, POSTN, PTX3, TIMP1, ITGB5, CD44, LOXL2, MYL9
HALLMARK_ESTROGEN_RESPONSE_EARLY	0.223752	0.310767	0.118288	0.303575	1.11052	187	DHRS3, CYP26B1, CALB2, ABAT, TPD52L1, SLC1A1, ABCA3, NBL1, SYNGR1, OLFM1, MUC1, RAB17, IGFBP4, SLC37A1, WFS1, DYNLT3, SVIL, OPN3, GREB1, STC2, ANXA9, MINDY1, PRSS23, SLC2A1, THSD4, AQP3, TTC39A, ADD3, CCND1, TGM2, SCARB1, SYBU, KRT15, GJA1
HALLMARK_ESTROGEN_RESPONSE_LATE	0.002947	0.00818611	0.431708	-0.400314	-1.49862	172	CDC20, KIF20A, PLK4, CXCL12, GINS2, FGFR3, RNASEH2A, MYB, ID2, FKBP5, EGR3, CDC6, STIL, SLC7A5, DHRS2, XRCC3, DUSP2, NAB2, FABP5, FLNB, EMP2, RBBP8, AREG, NXT1, UGDH, GALE, NRIP1, SERPINA1, PRKAR2B, SFN, NCOR2, FKBP4, BCL2, ITPK1, HPRT1, TPBG, CLIC3, GAL
HALLMARK_FATTY_ACID_METABOLISM	0.648881	0.720979	0.0587186	0.262788	0.927601	145	CD36, INMT, REEP6, GABARAPL1, MAOA, SERINC1, ACSL5, ACADS, MLYCD, EPHX1, ACAA1, TDO2, PCBD1, RETSAT, RDH16, TP53INP2, CRAT, PRDX6, MCEE, PPARA, OSTC, HSD17B11, CEL, HMGCL, PTPRG, UBE2L6, SLC22A5, ADH1C
HALLMARK_G2M_CHECKPOINT	6.00963e-48	1.50241e-46	1.80309	-0.830505	-3.14111	189	CDC20, TROAP, MKI67, NEK2, PBK, BIRC5, KIF2C, PLK1, CENPA, PRC1, BUB1, LMNB1, TTK, CENPF, AURKB, MYBL2, CDKN2C, KNL1, NDC80, PLK4, RAD54L, POLQ, KIF15, CCNA2, CCNB2, CENPE, TACC3, TPX2, KIF11, CDKN3, EXO1, EZH2, PTTG1, MAD2L1, ESPL1, GINS2, FBXO5, KIF20B, SMC4, E2F2, DBF4, MCM5, RACGAP1, BRCA2, TMPO, MCM2, BARD1, CKS1B, TRAIP, H2AFZ, CDC6, DDX39A, CCNF, KIF22, STIL, CDC7, MCM3, LBR, SLC7A5, H2AFX…
HALLMARK_GLYCOLYSIS	0.60095	0.682898	0.0785029	-0.251762	-0.948885	182	KIF20A, CENPA, IGFBP3, NASP, SDC1, PFKP, VCAN, AURKA, CLN6, GALK2, PDK3, STMN1, GALE, ENO1, LDHA, PAXIP1, CASP6, GUSB, SLC25A13, NT5E, PGM2, FKBP4, TPBG, SLC37A4
HALLMARK_HEDGEHOG_SIGNALING	0.261603	0.353518	0.121543	-0.39978	-1.14554	34	GLI1, HEY1, TLE3, AMOT, ADGRG1, NRP1, NRCAM, MYH9, CDK5R1, TLE1
HALLMARK_HEME_METABOLISM	5.29567e-05	0.000240712	0.557332	0.477547	1.72752	176	C3, MYL4, HBD, RHCE, RAP1GAP, MXI1, ALDH6A1, BNIP3L, FTCD, OSBP2, SNCA, FN3K, MOSPD1, HAGH, SLC22A4, YPEL5, EZH1, CLIC2, SIDT2, SLC2A1, GDE1, ATP6V0A1, EPB41, LRP10, HEBP1, AQP3, DMTN, TRAK2, ERMAP, BPGM, ANK1, MARCH2, MARCH8, OPTN, GYPC, SLC6A8, CTNS, HIST1H4C, MOCOS, ADIPOR1, KAT2B, CTSB, PC, DAAM1, NFE2L1, TMEM9B, ISCA1, SDCBP, SELENBP1, CLCN3, GYPE, CCDC28A, FBXO9, LPIN2
HALLMARK_HYPOXIA	0.029361	0.0587219	0.352171	0.35995	1.30722	183	PPP1R3C, TGFB3, KLHL24, GPC4, AK4, MXI1, AMPD3, RORA, BNIP3L, IL6, DTNA, NDRG1, GAA, EFNA3, PNRC1, GCNT2, ANGPTL4, STC2, GLRX, F3, LOX, VLDLR, INHA, ATF3, DDIT4, SLC2A1, ADM, DCN, CCNG2, PAM, TGM2, VEGFA, SCARB1, HEXA, FAM162A, SRPX, CDKN1C, SDC3, RBPJ, TMEM45A, NDST2, HK2, WSB1, PPFIA4, SELENBP1, SLC25A1, DDIT3, PRDX5, LXN, SDC2, EXT1, P4HA1, NEDD4L, ATP7A, SLC2A3, IDS, TGFBI, GYS1
HALLMARK_IL2_STAT5_SIGNALING	0.0716724	0.119454	0.21925	0.340655	1.23527	178	FGL2, DHRS3, CXCL10, CCND2, ITIH5, GABARAPL1, LIF, GUCY1B1, MUC1, WLS, RORA, SOCS1, TNFRSF21, NDRG1, PRNP, F2RL2, MAP6, BMP2, S100A1, SYNGR2, CDCP1, IFITM3, GPR65, AKAP2, CD81, TGM2, IKZF2, CDKN1C, MXD1, APLP1, HK2, PTH1R, SMPDL3A, TWSG1, CD44, PRAF2, IGF2R, TIAM1, SLC29A2, MAP3K8, P4HA1, COL6A1, RABGAP1L, LCLAT1, SLC2A3, SH3BGRL2, HIPK2, ANXA4, CCNE1, BCL2L1, IFNGR1, AHR, LRIG1
HALLMARK_IL6_JAK_STAT3_SIGNALING	0.00251601	0.00786254	0.431708	0.505626	1.60114	69	A2M, CD36, CXCL10, EBI3, CD14, SOCS1, IL1B, IL6, TNFRSF21, CD9, IRF9, STAT3, ACVRL1, IL9R, CD44, STAT1, IL1R1, IL10RB, PTPN1, INHBE, IFNAR1, MAP3K8, OSMR, ACVR1B, IFNGR1, STAT2
HALLMARK_INFLAMMATORY_RESPONSE	0.00135207	0.00482882	0.45506	0.44086	1.58463	164	TNFSF15, OLR1, CXCL10, BST2, CCL2, ABCA1, KCNJ2, NLRP3, ICAM1, IFITM1, KCNA3, TLR3, LIF, EBI3, CD82, PVR, PDPN, CD14, IL1B, IL6, CCR7, C5AR1, SLC1A2, SCARF1, F3, BEST1, DCBLD2, ADM, SLC31A1, SLC31A2, MSR1, GPR132, GCH1, GP1BA, MXD1, RNF144B
HALLMARK_INTERFERON_ALPHA_RESPONSE	1.83024e-05	0.00010168	0.57561	0.574733	1.90178	92	TXNIP, CXCL10, BST2, GBP2, C1S, IFITM1, HERC6, IFIT2, MX1, DHX58, GMPR, IFI27, IFI30, LGALS3BP, EPSTI1, ISG15, IFITM3, IFI44L, CD74, IRF9, NCOA7, B2M, LY6E, USP18, IFIH1, HLA-C, PARP9, UBE2L6, TMEM140, BATF2, DDX60
HALLMARK_INTERFERON_GAMMA_RESPONSE	1.12467e-05	7.02921e-05	0.593325	0.491683	1.78787	180	VCAM1, FGL2, IDO1, OAS2, TXNIP, CXCL10, BST2, CCL2, FCGR1A, C1S, ICAM1, SOD2, SERPING1, HERC6, IFIT2, MX1, HLA-DMA, DHX58, SOCS1, IL6, IFI27, C1R, IFI30, APOL6, IFIT1, LGALS3BP, EPSTI1, ISG15, IFITM3, ST3GAL5, CFB, IFI44L, CD74, BPGM, XAF1, GCH1, VAMP5, IRF9, STAT3, SECTM1, B2M, LY6E, USP18, IFIH1, VAMP8, STAT1, STAT4, PTPN1, DDX58, UBE2L6
HALLMARK_KRAS_SIGNALING_DN	0.05026	0.093074	0.266351	0.369882	1.29706	135	TG, P2RX6, SELENOP, CAMK1D, IGFBP2, TGFB2, NR4A2, MX1, MFSD6, MYO15A, PRKN, RGS11, SLC25A23, COPZ2, PDK2, CLDN16, MAGIX, LYPD3, TENM2, KCND1, IDUA, IFI44L, WNT16, SLC29A3, MAST3, SPHK2, CLSTN3, COQ8A, GP1BA, THNSL2, GAMT, KRT15, ARHGDIG, SNN, EGF, SPTBN2, MTHFR
HALLMARK_KRAS_SIGNALING_UP	0.0029121	0.00818611	0.431708	0.411008	1.48682	176	SERPINA3, APOD, HSD11B1, CXCL10, TMEM176B, CCND2, GPNMB, PLAT, SNAP25, ALDH1A2, FGF9, CPE, PEG3, LIF, TMEM158, TNNT2, FUCA1, JUP, IL1B, CTSS, ANO1, SPON1, ANGPTL4, GLRX, MAP7, TSPAN1, TMEM176A, BMP2, TSPAN13, BTC, DCBLD2, DUSP6, CFB, TRIB2, SCG5, BPGM, VWA5A, CDADC1, HDAC9, RELN, GYPC, SATB1
HALLMARK_MITOTIC_SPINDLE	4.38112e-21	5.4764e-20	1.18665	-0.685789	-2.59232	194	NEK2, DLGAP5, BIRC5, KIF2C, PLK1, PRC1, BUB1, LMNB1, TTK, CENPF, ANLN, NDC80, KIF15, CCNB2, CENPE, TPX2, KIF11, ESPL1, FBXO5, KIF20B, SMC4, RACGAP1, BRCA2, KNTC1, KIF22, CNTRL, DOCK2, CENPJ, INCENP, ECT2, EZR, AURKA, PREX1, SASS6, FLNB, CEP72, SMC1A, TUBGCP3, SMC3, PDLIM5, NIN, SHROOM2, NET1, PCNT, GEMIN4, MARCKS, PIF1, CDC42EP1, CNTROB, FLNA, PLEKHG2, CEP131, ALMS1, MID1IP1, MYO9B, CKAP5, ACTN4,…
HALLMARK_MTORC1_SIGNALING	0.00222461	0.00741537	0.431708	-0.401907	-1.51993	197	PLK1, BUB1, MCM2, DHFR, DDX39A, CCNF, CORO1A, SLC7A5, MCM4, CDC25A, PHGDH, AURKA, TMEM97, CACYBP, PNP, BHLHE40, EBP, UCHL5, ENO1, NUP205, TOMM40, HMBS, LDHA, HSPD1, RRP9, INSIG1, GMPS, HMGCR, CCT6A, HPRT1, PPP1R15A, SLC6A6, SLC37A4, HSPE1, G6PD, DHCR24, GPI, SHMT2, PNO1, PSMD12, PITPNB, TUBG1, ELOVL6, MTHFD2L, STIP1, NFYC, SERPINH1, HMGCS1, PSMA4, PDAP1, PSMD14, CTSC, IDH1, PSMG1, PSMC6, NUFIP1, …
HALLMARK_MYC_TARGETS_V1	4.82484e-27	8.0414e-26	1.34993	-0.720821	-2.73072	198	CDC20, CCNA2, MAD2L1, MCM5, MCM7, TYMS, MCM2, H2AFZ, MCM4, USP1, RFC4, CDK2, RRM1, MCM6, FBL, DEK, HNRNPA1, HNRNPD, KPNA2, HNRNPR, LSM2, HNRNPA2B1, TRA2B, MRPL23, PCNA, SRSF7, U2AF1, CTPS1, DUT, HNRNPA3, RANBP1, CAD, SNRPD1, SRSF2, SNRPA, SRSF3, SET, ORC2, SF3B3, SRSF1, NME1, NOLC1, PA2G4, C1QBP, ILF2, MRPL9, CCT2, RUVBL2, DDX21, LDHA, TRIM28, PRPS2, HSPD1, POLD2, DDX18, BUB3, HDGF, EIF4A1, ABCE1…
HALLMARK_MYC_TARGETS_V2	3.3551e-09	3.3551e-08	0.774939	-0.742633	-2.35679	58	PLK1, PLK4, MCM5, MCM4, DUSP2, TMEM97, UTP20, MRTO4, TCOF1, PPAN, NIP7, NOLC1, PRMT3, PA2G4, SLC19A1, GRWD1, HSPD1, DDX18, NOP2, RRP9, BYSL, EXOSC5, TBRG4, PPRC1, CBX3, WDR43, NPM1, NOC4L, CDK4, NOP56, MYC, GNL3, IPO4, HSPE1, PUS1, PHB, NOP16, IMP4, WDR74, DCTPP1, PES1, LAS1L, NDUFAF4, AIMP2
HALLMARK_MYOGENESIS	0.000345306	0.0013281	0.498493	0.449674	1.61907	174	MYL4, CD36, APOD, PPP1R3C, BDKRB2, MYOM2, TPD52L1, PTP4A3, FXYD1, SH3BGR, DAPK2, CHRNA1, SOD3, KCNH2, GPX3, TNNT2, FABP3, CLU, TCAP, IGFBP7, FOXO4, DMPK, DTNA, GAA, CTF1, PRNP, SVIL, COX7A1, DMD, STC2, ITGA7, MAPRE3, SYNGR2, FHL1, COL3A1, BIN1, SGCD, MYLK, SPARC, TNNC1, SLC6A8, CRAT, GABARAPL2, PC, CKMT2, CNN3, ATP6AP1, PPFIA4, ITGB5
HALLMARK_NOTCH_SIGNALING	0.709939	0.771673	0.062249	-0.298884	-0.841414	31	HES1, LFNG, DLL1, FZD1, PPARD, CUL1, RBX1, PRKCA, MAML2, NOTCH1, DTX2
HALLMARK_OXIDATIVE_PHOSPHORYLATION	1	1	0.0534572	-0.171069	-0.650834	200	MAOB, ATP1B1, FH, SLC25A5, CS, LDHA, MRPL11, TIMM9, NDUFA9, PHB2, NQO2, SLC25A12, TIMM10, GPI, ATP5F1C, MRPL35, MRPL15, TOMM22, GOT2, LDHB, ABCB7, IDH3B, BAX, IDH1, COX11, MRPS30, RHOT2, HSPA9, COX10, CASP7, CYC1, MRPS15, DLAT, VDAC3, CYCS, MRPS11, NDUFA4, SLC25A3, MRPS12, COX7A2, NDUFB6, TIMM50, MTRF1, ATP5MC2, ATP5PB, TCIRG1, MRPS22, BCKDHA, OPA1, GLUD1, ATP5MC1, NDUFAB1, ACADVL, SDHB, NDUFC2, …
HALLMARK_P53_PATHWAY	0.000137851	0.00057438	0.518848	0.444524	1.63572	193	CLCA2, TXNIP, CCND2, ABAT, TPD52L1, CTSF, JAG2, HIST1H1C, LIF, CD82, CDKN2B, DRAM1, FUCA1, TCN2, PERP, NUPR1, SOCS1, NDRG1, SAT1, IFI30, BMP2, ATF3, DDIT4, RRAD, ABHD4, ZFP36L1, MXD4, F2R, BLCAP, EPHX1, KIF13B, VWA5A, CD81, TM4SF1, ABCC5, FAM162A, RETSAT, COQ8A, ZMAT3, MXD1, CTSD, TSPYL2, H2AFJ, NINJ1, ISCU, RALGDS, TM7SF3, TSC22D1, ANKRA2, SESN1, VAMP8, STOM, KRT17, HIST3H2A, DDIT3
HALLMARK_PANCREAS_BETA_CELLS	0.451977	0.564972	0.0813027	0.401707	1.0071	21	PCSK2, DPP4, STXBP1, SRP14
HALLMARK_PEROXISOME	0.175182	0.250261	0.140406	0.362122	1.19298	91	DHRS3, SOD2, CADM1, EPHX2, STS, ACSL5, MLYCD, ACAA1, ABCC5, RETSAT, CRAT, HSD17B11, TSPO, CEL, HMGCL, CLN8, PRDX5, PEX11B, SCP2, SLC25A4, GSTK1, CACNA1B, ECH1, PEX2, PEX6, ABCD1, ESR2, ALDH9A1, CAT, SOD1, CRABP2, BCL10, ACOT8, ACOX1
HALLMARK_PI3K_AKT_MTOR_SIGNALING	0.441964	0.564972	0.0919686	-0.290937	-0.992062	97	PITX2, MAP2K6, E2F1, CDK2, CAMK4, RPS6KA1, MAPK8, SFN, PPP1CA, PAK4, CDK4, ARHGDIA, NGF, TRAF2, CDKN1B, ECSIT, HRAS, UBE2N, NOD1, ATF1, PFN1, EIF4E, PRKAR2A, UBE2D3, RAF1
HALLMARK_PROTEIN_SECRETION	0.0711679	0.119454	0.227987	0.39079	1.29531	94	ABCA1, PAM, STX12, GALC, SCAMP1, CLN5, VAMP4, SNAP23, YIPF6, CLCN3, CD63, IGF2R, RER1, ERGIC3, SEC22B, ATP7A, VAMP3, SNX2, RAB9A, ADAM10, VAMP7, GOSR2, NAPA, CAV2, STX7, SEC31A, ATP6V1H, TMED10, OCRL, SOD1, TSG101, TMED2, RAB5A, LAMP2, BET1, USO1
HALLMARK_REACTIVE_OXYGEN_SPECIES_PATHWAY	0.469159	0.572145	0.078921	0.335045	0.992304	49	MPO, SOD2, GPX3, PRNP, GLRX, MBP, FTL, PRDX6, HHEX, PRDX4, ATOX1
HALLMARK_SPERMATOGENESIS	1.66898e-07	1.39082e-06	0.690132	-0.613804	-2.093	97	NEK2, KIF2C, BUB1, TTK, NCAPH, CCNB2, CDKN3, EZH2, DBF4, DCC, DMC1, RPL39L, RFC4, TOPBP1, AURKA, CAMK4
HALLMARK_TGF_BETA_SIGNALING	0.00391859	0.00979648	0.407018	-0.549294	-1.70414	53	ID1, ID3, ID2, SMAD7, KLF10, SMAD6, SKIL, BCAR3, LTBP2, SERPINE1, PPP1CA, NCOR2, PPP1R15A, RHOA, JUNB, TGFB1, SMURF1, PMEPA1, UBE2D3
HALLMARK_TNFA_SIGNALING_VIA_NFKB	0.139759	0.21777	0.184706	-0.306438	-1.15801	191	HES1, KLF2, SPHK1, ID2, EGR3, G0S2, NR4A1, KLF10, GADD45B, PTGS2, IER2, PLAUR, IL15RA, HBEGF, BIRC3, DUSP2, SERPINB2, NFKBIA, FOSL1, RHOB, GEM, BHLHE40, TNFAIP3, BIRC2, AREG, INHBA, PFKFB3, PDLIM5, SOCS3, IER5, CLCF1, MARCKS, SERPINE1, ZBTB10, YRDC, FUT4, SERPINB8, PPP1R15A, MYC, IL18, KLF6, TIPARP, NFKB1, REL, TNC, JUN, PHLDA2, DUSP1, RIPK2, TRIP10, JUNB
HALLMARK_UNFOLDED_PROTEIN_RESPONSE	0.144796	0.21777	0.175204	-0.341408	-1.19337	111	CKS1B, SLC7A5, EXOSC9, H2AFX, FUS, EXOSC2, DKC1, DDX10, EIF4EBP1, NOLC1, NFYA, GEMIN4, EXOSC10, EIF4A1, RRP9, EXOSC5, BANF1, KHSRP, NPM1, ZBTB17, NHP2, NOP56, DCP1A, CNOT6, CEBPG, EIF4A3, EDC4, CXXC1, EIF4E, TARS, NOP14, MTREX, CHAC1, HSPA9, ATF4, DCP2
HALLMARK_UV_RESPONSE_DN	0.787589	0.820406	0.0650878	-0.24001	-0.870077	142	ID1, HAS2, SMAD7, MMP16, SLC7A1, SFMBT1, BHLHE40, AKT3, SYNJ2, MIOS, PDLIM5, TENT4A, PRKAR2B, SYNE1, NRP1, SERPINE1, INSIG1, ZMIZ1, MRPS31, IRS1, MYC, DLC1, NFKB1, SNAI2, AMPH, MT1E, DUSP1, CDKN1B
HALLMARK_UV_RESPONSE_UP	0.148084	0.21777	0.15017	0.329291	1.1724	152	ICAM1, SOD2, IGFBP2, CREG1, NPTXR, OLFM1, MAOA, MAPK8IP2, CDKN2B, KCNH2, GPX3, IL6, CYB5R1, SELENOW, BMP2, ATF3, CCK, SULT1A1, RRAD, AQP3, EPHX1, GRINA, ACAA1, TST, SPR, GCH1, SQSTM1, CDKN1C, SLC6A8, ATP6V1F
HALLMARK_WNT_BETA_CATENIN_SIGNALING	0.518438	0.602835	0.0815265	-0.331479	-0.966292	38	HEY1, FZD8, TCF7, DKK1, LEF1, MAML1, DLL1, NCOR2, MYC, FZD1, HDAC2
HALLMARK_XENOBIOTIC_METABOLISM	0.00338008	0.00889496	0.431708	0.414257	1.49532	171	CCL25, PTGDS, CD36, HSD11B1, TMEM176B, VTN, HSD17B2, PDK4, SLC46A3, TGFB2, AKR1C2, APOE, GABARAPL1, MAOA, RAP1GAP, IGFBP4, JUP, F10, GCNT2, PROS1, GCKR, CFB, EPHX1, AKR1C3, TDO2, GCH1, ALDH2, RETSAT, CYP27A1, NINJ1, PINK1, SPINT2, PC, DDT, IL1R1, CSAD, CROT, COMT, PTGES, LPIN2, UPB1, ADH1C, ENTPD5, CYP2E1, MAN1A1, ITIH4, NFS1, XDH, ACOX2, CYB5A, DCXR, DHRS7
