# Supplementary material for: Novel insights from a multiomics dissection of the Hayflick limit
Source: eLife. 2022 Feb 4;11:e70283. doi: 10.7554/eLife.70283 (PMC8933007; doi:10.7554/eLife.70283)
Supplement: Figure 1—source data 4. [file elife-70283-fig1-data4.xlsx]

## Sheet: readme
	First Sheet is matrix of individual timepoint inputs into GSEA, rest are results
	sample anme in Sdata	sample_name manuscript		RS	replicative senescecne
	TP2	hTERT.PDL.ctrl 25		RIS	radiation induced senescence
	TP4	hTERT.PDL.ctrl 33		CD	cell denisty
	TP5	hTERT.PDL.ctrl 37
	TP6	hTERT.PDL.ctrl 46
	TP7	hTERT.PDL.ctrl 50
	PDL25	RS_PDL25
	PDL28	RS_PDL28
	PDL33	RS_PDL33
	PDL37	RS_PDL37
	PDL45	RS_PDL45
	PDL46	RS_PDL46
	PDL50	RS_PDL50
	PDL52	RS_PDL52
	PDL53	RS_PDL53
	d3	RIS_d3
	d4	RIS_d4
	d5	RIS_d5
	d6	RIS_d6
	d9	RIS_d9
	D1.5c	CD_D1.5c
	D2c	CD_D2c
	D2.5c	CD_D2.5c
	D2.75c	CD_D2.75c
	D3c	CD_D3c
	D3.5c	CD_D3.5c
	D4c	CD_D4c
	D7c	CD_D7c
	D10c	CD_D10c

## Sheet: ALL_TPs_input_gsea
gene	TP2	TP4	TP5	TP6	TP7	PDL25	PDL28	PDL33	PDL37	PDL45	PDL46	PDL50	PDL52	PDL53	d3	d4	d5	d6	d9	D1.5c	D2c	D2.5c	D2.75c	D3c	D3.5c	D4c	D7c	D10c
2021-12-01	-0.024232	-0.0130746	-0.0323744	-0.0131557	-0.0493068	0.0305302	-0.0439626	-0.0104627	-0.03627	-0.026042	-0.0257576	0.156284	-0.0678064	0.0585186	0.221243	0.0506411	0.177624	0.13248	0.0720432	0.0322231	0.0261888	0.0628235	0.0402016	0.144075	0.0919085	0.0962297	0.248278	0.115999
2021-03-01	0.353388	0.589251	0.554494	0.931787	0.597465	-0.31678	-0.67513	-0.986045	-1.08861	-0.611816	-0.947079	-1.89253	-1.2172	-1.56649	-0.253451	-0.149887	-0.176914	0.433821	-0.304934	0.467202	0.173063	0.315396	0.3848	0.376258	0.427796	0.610116	0.101234	0.211696
1-Mar.1	0.353388	0.589251	0.554494	0.931787	0.597465	-0.349588	-0.405882	-0.331525	-0.741205	-0.788639	-0.762546	-0.868645	-0.795213	-0.685345	-0.550026	-0.602046	-0.761043	-0.68198	-0.69353	0.089441	0.450836	0.126137	0.0181173	0.157355	0.169407	0.111642	0.178801	-0.0997969
2021-09-01	0.115152	-0.206157	-0.214586	-0.0177926	-0.0757767	4.34e-05	-0.0208733	0.0774841	-0.0837525	-0.037017	0.000108053	0.00428352	-0.034798	-0.0499804	0.119515	0.308165	0.399256	0.37145	0.732437	0.0836497	0.148164	0.303897	0.0460099	0.226604	0.0544508	0.268697	0.361058	-0.0384586
2021-03-10	0.115662	0.12641	-0.0826478	0.156728	-0.0137623	0.440291	0.303566	0.164732	0.285488	0.494079	0.394717	0.173085	0.501237	0.405772	0.76234	0.735155	0.969021	0.407943	0.895677	-0.136508	-0.0944772	-0.169231	0.0681462	-0.183762	0.0672815	-0.278485	-0.253483	-0.432621
2021-09-10	0.428469	0.0507321	0.108652	-0.339409	-0.562684	-0.114951	0.133148	0.00586478	-0.217925	-0.279399	-0.248281	-0.490209	-0.726877	-1.35947	-0.199286	-0.179054	-0.138181	-0.111231	-0.342584	0.16792	0.0776251	0.0547998	0.0356193	0.0818894	0.0143063	-0.00937047	-0.110248	-0.180252
2021-03-11	0	0	0	0	0	0	0	0	0	0	0	0	0	0	0.0821251	0	0.0931389	0	0	0	0	0	0	0	0	0	0	0
2021-09-11	0.399471	0.188652	0.223076	-0.251509	-0.765592	0.342095	0.61254	0.571625	0.495547	0.58473	0.536373	0.328401	0.596326	-0.133041	0.473365	0.541207	0.544592	0.326697	0.426352	0.454173	0.419895	0.612836	0.652117	0.712323	0.771782	0.698367	0.169858	0.0449182
2021-09-12	1.55329e-05	0	0	0	0	0	0.018514	0	0	0	0.0449411	0.025002	0	0	0	0	0.000840779	0	0	-0.0252809	-0.0252809	-0.0252809	-0.0252808	-0.0252809	-0.0252809	-0.0252809	-0.0252809	-0.0252809
2021-09-14	0.075833	0.075167	0.0521148	0.0383395	-0.0211878	0.0471226	0.0519672	0.0767583	-0.000651573	0.0338884	0.0167528	0.0750608	0.0770594	0.110886	0.0244622	-0.0371647	0.141515	-0.0360539	-0.0731809	-0.0573871	-0.0415399	-0.0804993	-0.0473266	-0.087809	0.164978	0.0604999	0.214168	-0.0490412
2021-03-02	0.0602466	0.241431	0.135994	0.350725	0.0962126	0.347584	0.355173	0.477638	0.494385	0.82771	0.959964	0.6564	0.711946	0.418792	-0.544282	-0.375283	0.00977231	0.117102	0.243341	0.847654	0.302962	0.537621	0.716662	0.872731	1.16142	0.732846	1.01096	0.494635
2-Mar.1	0.0602466	0.241431	0.135994	0.350725	0.0962126	0.278134	0.463172	0.455465	0.678243	0.758345	0.79358	1.3457	1.42153	1.27335	0.804112	0.715462	0.890709	0.951614	1.03608	0.156736	0.145009	0.211934	0.259704	0.22279	0.441242	0.274224	0.442506	0.632932
2021-09-02	0.281565	0.182125	0.125283	-0.13887	-0.506678	0.184853	0.260898	0.208229	0.06354	0.11771	0.204772	0.0774743	0.436255	0.0241372	0.0519509	0.107107	0.111666	0.132379	0.100533	0.283403	0.240509	0.283593	0.281974	0.340303	0.400554	0.360432	0.121423	0.144138
2021-03-03	-0.647622	-0.813475	-0.987949	-1.31913	-0.350574	-0.206324	-0.743483	-0.762177	-0.697113	-0.378708	-0.490626	-1.34677	-2.06651	-2.61465	-0.610131	-0.955195	-0.8831	-0.832351	-1.3385	-0.127265	-0.0881696	-0.386341	-0.920463	-0.828739	-1.4887	-1.25589	-1.83878	-1.60251
2021-09-03	0.0515145	0.12715	0.0500089	-0.0436252	-0.179643	0.120526	-0.000742977	0.0352599	0.0443998	-0.124631	-0.174651	0.217883	-0.0151933	0.282117	-0.00809641	0.0241981	0.0805872	-0.0159068	0.259665	0.091756	0.135236	0.146756	0.225558	0.169602	0.318226	0.222399	0.209064	0.545214
2021-03-04	0.374242	-0.125531	-0.0360275	-0.394967	0.159718	0.344817	0.185808	0.185247	0.219292	0.583062	0.529326	0.539271	0.763989	0.0102344	-0.0749753	-0.129754	-0.218368	-0.160785	-0.913278	0.595657	0.486066	0.280906	0.0173169	-0.220749	-0.517776	-0.738789	-1.37317	-1.30242
2021-09-04	-0.0773262	-0.0808457	-0.050667	0.395337	0.135113	-0.275823	-0.267018	-0.145267	-0.153116	-0.138371	-0.16984	-0.119606	-0.192107	-0.0397932	0.22958	0.279628	0.3041	0.00596863	0.227062	-0.141962	-0.13558	0.0719947	-0.0117736	0.0702726	0.229935	0.295324	0.417139	0.0552776
2021-03-05	0.0865737	-0.0309991	0.064388	0.0117662	-0.0961443	0.0702242	0.0855531	-0.0882553	-0.101279	-0.207026	-0.0245042	-0.121313	-0.3038	-0.522779	-0.475408	-0.417185	-0.404514	-0.309346	-0.301201	0.25727	0.212589	0.163853	0.0055028	0.00369725	0.0609149	-0.141093	0.111885	-0.256312
2021-09-05	0.348065	-0.0594314	-0.0646974	0.19158	0.217968	0.0495006	0.0399773	0.00241133	0.0225657	0.071935	-0.0862336	0.137826	-0.531975	-0.507211	0.416664	0.183152	0.311959	0.0904434	0.315891	0.240446	0.0485318	0.11711	0.0422691	-0.0582121	0.16706	0.174812	1.40962	0.248219
2021-03-06	0.153079	0.000685865	0.0896656	0.0349479	-0.223182	0.000359361	0.0678059	-0.0262325	0.117316	0.25861	0.33587	0.578588	0.355121	-0.0999102	0.284384	0.356255	0.376414	0.33617	0.192819	0.35542	0.393221	0.305011	0.295551	0.253305	0.349739	0.227359	0.321979	0.169399
2021-09-06	0.33253	0.227144	0.073013	0.270218	0.0720361	-0.154317	-0.332764	-0.349781	-0.377261	-0.337273	-0.355436	-1.3995	-0.439507	-0.673988	0.103801	0.0148331	0.171443	-0.0735849	-0.171645	0.190574	0.20569	0.561319	0.717399	0.842811	1.18124	0.846195	0.589875	0.850003
2021-03-07	0.651454	0.170789	0.108415	-0.446885	-0.530835	-0.149582	-0.018052	-0.0926087	-0.528602	-0.47734	-0.549107	-0.287842	-0.848827	-0.972968	-0.233141	-0.419163	-0.478536	-0.235486	-0.332323	0.219175	0.119203	0.107868	0.0776587	0.169769	0.129708	0.0686796	-0.252272	-0.160145
2021-09-07	0.462419	0.110716	0.233262	-0.290077	-0.447024	-0.283512	-0.0179872	-0.088461	-0.380102	-0.421616	-0.394521	-0.305577	-0.458869	-0.809562	-0.198266	-0.189511	-0.102156	-0.084634	-0.101158	-0.00311912	-0.0466663	-0.10207	-0.156429	-0.131957	-0.231206	-0.285101	-0.525207	-0.203866
2021-03-08	-0.00036334	0.117263	0.0482035	0.434792	0.0290984	-0.0798727	0.049337	0.169054	0.0996242	0.237748	0.236803	0.20436	0.246576	0.199499	0.228176	0.593969	0.59846	0.623792	0.766195	0.602921	0.876743	1.25922	1.19932	1.24731	1.6249	1.46058	2.05775	1.29953
2021-09-08	0.0577949	-0.0308598	-0.0529812	-0.114583	-0.20681	0.119738	0.108673	0.097649	0.182961	0.294442	0.24187	0.241584	0.200278	-0.262437	-0.0201003	0.0268634	0.059026	-0.0263743	0.0523877	0.497848	0.5135	0.534586	0.378831	0.316626	0.272517	0.11972	-0.0825844	0.00221087
2021-03-09	0.0669362	-0.21754	-0.33469	-0.260722	-0.570864	-0.138322	-0.0355422	0.176196	0.0207033	0.158663	0.127551	0.274038	0.48942	1.23401	0.142444	0.22076	0.397772	-0.00235053	0.500527	0.300441	0.608605	1.02177	1.0557	1.06804	1.35164	1.42473	2.00965	1.60975
2021-09-09	0.482641	0.0996572	0.0794766	0.164513	0.0620405	-0.153049	-0.173541	-0.258777	-0.204583	-0.0552679	-0.155488	-0.736553	-0.550105	-0.952114	0.0551068	0.0657361	0.0526525	0.110792	-0.00281257	0.704747	0.78431	1.02577	0.907366	0.937913	1.01755	0.80645	0.363303	0.799593
A1BG	-0.367532	0.0369074	0.00246332	0.316003	0.067223	0.0611699	0.173662	0.220731	0.264392	-0.230034	-0.109003	0.806701	0.307843	-0.0628663	0.397872	0.584677	0.692238	0.682018	0.869728	-0.170967	-0.185703	-0.0744536	-0.0217563	0.117233	-0.0816472	0.0643995	0.238492	0.4225
A1BG-AS1	0.0984962	0.0231021	0.0414827	0.165484	0.169206	0.478728	0.487089	0.643116	0.664807	0.932957	0.861504	1.45632	1.21699	0.981745	0.694963	0.863524	0.913096	0.883567	0.907535	0.0497245	0.137302	0.278704	0.199214	0.164769	0.150582	0.152673	0.0769561	0.253623
A1CF	0	0	0	0	0	-0.00196822	-0.00196822	0.00677643	0.00490783	-0.000263653	0.000179657	-0.00196822	0.00319668	0.00972475	0.0142268	0.00892194	0.0106476	-0.0100628	-0.0217671	0.00984559	0.0132872	-0.00339679	-0.00335871	0.0210905	0.00156331	-0.00177021	-0.00339679	0.00955751
A2M	-0.19549	-0.0375071	-0.252902	0.0615692	0.0551353	-0.118998	0.0901644	0.0429507	0.213682	0.233722	0.0924359	1.35153	5.10601	6.16693	0.326234	-0.0700038	1.15744	0.990692	2.80662	0.478453	0.041682	0.0361779	-0.17017	-0.00599517	0.344093	0.96858	2.81881	1.57894
A2M-AS1	0.009572	0.00926728	0	0	0	-0.199487	-0.225662	-0.211512	-0.303525	-0.282252	-0.294859	-0.337721	-0.310556	-0.265177	-0.103498	-0.125712	-0.151303	-0.207676	-0.0861033	-0.00345621	0.0383538	0.0740735	-0.0109487	0.0680351	0.120352	-0.0172477	0.0398647	0.0182941
A2ML1	0.00560238	0.0265511	0.0222938	1.39844e-05	0.0240667	0.0258529	0.0220352	0.16746	0	0.0494032	0.0220361	0.153221	0.0213213	0.0370895	-0.109874	-0.0456202	0.0421102	0.0474225	0.113378	-0.0691989	-0.042607	-0.0300589	-0.0179016	-0.0914764	0.0746993	0.000618675	-0.0914019	-0.0438509
A2ML1-AS1	0	0	0	0	0	0	0.066608	0	0	0	0	0	0	0	0.154368	0	0	0	0	0	0	0	0	0	0	0	0	0
A2ML1-AS2	0	0	0	0	0	0	0	0	0	0	0	0.12808	0.0692221	0	0	0	0	0	0	0	0	0	0	1.47e-06	0	0	0	0
A3GALT2	0.000216496	-0.0425446	-0.0194957	-0.0425446	-0.0199161	0.00725472	-0.0220744	0.0261553	0.0240153	-0.0220744	-0.0220744	-0.0220744	-0.0220744	-0.0220744	-0.063184	-0.00840026	0.00308548	0.0545739	-0.00491218	-0.0160874	-0.0974099	-0.0974099	-0.027746	-0.0662839	-0.0974099	-0.0690286	-0.0654058	-0.0974099
A4GALT	0.391852	0.101928	0.26485	0.571188	0.454002	-0.305939	-0.430832	-0.380341	-0.220695	0.472367	0.359171	0.530461	0.742537	0.374292	0.236517	-0.238579	-0.0467068	-0.460192	-0.344347	0.437766	0.213509	0.216741	0.156454	0.0343091	0.102829	0.136271	0.346463	0.191568
A4GNT	0	0	0	0	0	0	0	0	0	0	0	0	0	0	-0.026701	-0.037069	-0.0139785	-0.119598	-0.0386681	0	0	0	0	0	0	0.0151691	0	0
AAAS	-0.120304	-0.398499	-0.358567	-0.308463	-0.125639	-0.25881	-0.42525	-0.472254	-0.521509	-0.391252	-0.452765	-0.621689	-0.897057	-1.0239	-0.252801	-0.527776	-0.450498	-0.490082	-0.340564	0.0361144	0.111077	0.0508864	-0.0320769	-0.166738	-0.182502	-0.317941	-0.265874	-0.299194
AACS	-0.143168	-0.344055	-0.376791	-0.323503	-0.292248	-0.0380009	0.00888454	0.00175791	-1.65e-05	0.09572	0.0598202	-0.33004	-0.517545	-0.564104	0.0711343	0.0474792	0.0360548	-0.00173004	-0.253414	0.442515	0.354557	0.607325	0.629261	0.707351	0.691926	0.48643	0.384289	0.0850663
AADAC	0	0	0	0	0	0	0.0120931	0	0	0	0.0135362	0.598445	10.9354	11.9472	0	0	0.037361	0	0	0.0212384	0	0.0375844	0	0	0.0470566	0	0.0222892	0.0171567
AADACL2	0.00382303	0	0	0	0.0041212	0	0	0.00428147	0	0.0272092	0.0179506	0	0.010095	0.00467236	-0.00703594	-0.0593608	-0.0268318	-0.0190677	-0.0256813	0	0	0	0.00982715	0.00969294	0.015154	0.0101204	0	0.0088167
AADACL2-AS1	0.00256936	0.0429785	0.00168511	0	0	0	0	0	0	0.0450385	0	0	0.032861	0.0522487	-0.006298	0.305158	-0.016259	0.000165125	-0.00711736	0.00633416	0.00497804	0.0012087	0.00232323	-1.06e-05	0.00608511	0.0515597	-1.06e-05	0.00408172
AADACL3	-0.00445109	-0.00445109	-0.00445109	-0.00445109	-0.00445109	0	0	0	0	0	0	0	0	0	0.00381008	-0.011548	-0.011548	-0.011548	-0.011548	-0.00519439	-0.00519439	-0.00519439	-0.00519439	-0.00519439	-0.00519439	-0.00519439	-0.00519439	-0.00519439
AADACL4	0	0	0	0	0	0	0	0	0	0	0.0472075	0	0.0111325	0	0	0	0	0	0.105356	0	0	0	0.0262252	0	0.0476977	0.0172764	0.0709652	0.0327595
AADAT	-0.0401072	-0.141934	-0.132434	-0.415354	-0.22118	0.0105427	-0.136624	-0.38391	-0.658604	-0.58403	-0.570886	-1.33373	-1.43094	-1.69458	-0.248656	-0.365962	-0.352923	-0.604305	-0.899811	0.0592687	0.0733273	0.0262078	0.0122515	-0.114725	-0.372507	-0.160349	-0.256754	-0.171429
AAED1	0.0721887	-0.0605062	-0.0346371	-0.179044	0.0194508	-0.226143	-0.286584	-0.326321	-0.221203	0.0282623	-0.100504	-0.424508	-0.286711	-0.631179	0.0290278	-0.0390444	-0.108116	-0.318313	-0.119249	0.029355	-0.0116208	-0.0782946	-0.206975	-0.191243	-0.19995	0.0324246	-0.139969	-0.50394
AAGAB	-0.191261	0.026811	0.0321407	-0.207614	-0.395797	0.0212478	0.098358	0.0581023	-0.00330866	0.113005	0.166304	-0.0246395	-0.0321212	-0.434501	0.192492	0.210009	0.194086	0.205555	0.21569	0.132504	0.0954611	0.179805	0.219458	0.309821	0.319037	0.291108	0.210381	0.161901
AAK1	0.397319	-0.00859978	-0.0132624	-0.0607489	-0.272501	-0.0338663	-0.0249041	-0.0929439	-0.0340723	-0.394774	0.00494004	-0.147385	-0.3289	-0.401352	0.142128	0.276459	0.204647	0.176424	-0.199381	0.943182	0.819708	0.845057	0.775804	0.632112	0.767392	0.569706	1.09534	0.383204
AAMDC	-0.407482	-0.111832	-0.024348	-0.0872412	0.216859	0.163898	0.370669	0.43507	0.542594	0.290145	0.367534	1.00954	0.240284	-0.416154	-0.0119932	0.448052	0.511902	0.416921	0.647743	0.118106	0.27618	0.126433	0.267561	0.15768	-0.0490673	-0.28022	-0.525174	-0.0601137
AAMP	-0.176563	-0.202106	-0.255104	-0.280452	-0.0863473	0.0571901	0.0989568	0.047286	0.0790653	-0.0649108	-0.0783269	0.180794	-0.220948	-0.394577	0.0416493	-0.0261579	-0.000968469	0.0408097	0.138476	0.171912	0.285264	0.182102	0.175075	0.137133	0.0313558	0.0330342	-0.00554041	0.0530064
AANAT	-0.00119871	0.100651	0.00388777	0.0475983	0.0346144	0.0357453	0.131999	0.0999234	0.0568742	0.0440959	0.0902597	0.15651	0.368613	0.212069	0.446952	0.0757788	0	0.0896186	0.436382	0.00701783	0.137174	0.134124	-0.132722	-0.103635	-0.132722	-0.132722	-0.0596705	-0.11403
AAR2	-0.233696	-0.219187	-0.267944	-0.213881	-0.0343217	0.14062	0.0706298	0.0577185	0.0787271	0.194882	0.156769	0.109935	-0.205447	-0.495369	0.00517986	-0.0656919	0.00697028	-0.152156	-0.0405369	0.234368	0.194172	0.2524	0.261514	0.181204	0.0455656	-0.0375285	-0.117812	-0.103243
AARD	-0.0625688	-0.0210666	0.0464397	0.173705	0.0654375	0.170237	-0.0306276	0.0558267	0.0149538	0.19469	0.029281	-0.0590175	0.0843581	-0.0360877	0.0469139	-0.0524571	-0.163854	-0.0602581	-0.140976	0.164278	-0.0736895	-0.0990138	-0.0562595	-0.0537618	-0.0994199	-0.152886	-0.119308	-0.160751
AARS	-0.0129196	-0.0252223	-0.0933146	0.364177	0.0223655	-0.267144	-0.332874	-0.41677	-0.44318	-0.408382	-0.520555	-1.02678	-1.1976	-1.06552	-0.365169	-0.277321	-0.231876	-0.354888	-0.31415	0.403963	0.551612	0.776454	0.804478	0.775126	1.16053	1.06027	1.33427	0.470536
AARS2	0.115124	-0.429373	-0.443793	-0.466508	-0.257721	-0.328218	-0.447221	-0.466198	-0.511656	-0.456839	-0.519057	-0.718785	-1.43568	-1.59569	0.412952	-0.050331	0.0659828	-0.347305	-0.279668	0.573169	0.615619	0.620511	0.490242	0.38786	0.383921	0.22608	0.0364749	0.267914
AARSD1	-0.30275	-0.181052	-0.253974	-0.237146	-0.168503	-0.0123594	-0.100404	-0.219458	-0.209126	-0.390434	-0.343435	-0.350976	-1.03495	-1.49196	-0.254673	-0.329746	-0.649982	-0.390854	-0.441165	-0.254807	-0.075324	-0.278685	-0.190276	-0.353256	-0.440245	-0.465113	-0.618496	-0.616408
AASDH	0.389268	0.273037	0.432279	0.138171	-0.254769	-0.167954	0.0212649	0.12801	-0.267308	0.006463	-0.0392523	-0.283156	-0.157739	-0.378569	0.266928	-0.00806201	0.143706	0.195091	0.176348	0.0234162	0.148653	0.397556	0.621048	0.58638	0.591832	0.483735	0.4995	0.593561
AASDHPPT	0.232707	0.09994	0.172224	-0.354701	-0.381718	-0.117337	0.0650611	-0.0719206	-0.17396	-0.194655	-0.0630671	-0.221271	-0.182846	-0.474338	0.0381514	0.00349703	-0.0915917	0.191945	-0.117325	0.201332	0.115539	0.0719452	0.0580482	0.0259936	-0.0333418	-0.149974	-0.18125	-0.0353354
AASS	0.176853	-0.061071	0.0948136	-0.139056	-0.428337	-0.132135	0.113249	0.0413393	-0.0795638	0.31474	0.196533	-0.230427	0.0819581	-0.209199	-0.0801982	0.036641	0.307086	-0.132588	0.142411	0.512189	0.795562	0.902083	0.977633	0.850777	0.890007	0.837171	1.08515	0.546686
AATBC	-0.00434666	-0.00434666	-0.00434666	-0.00434666	-0.00434666	-0.0040973	-0.0040973	-0.0040973	-0.0040973	-0.0040973	-0.0040973	-0.0040973	0.0158053	0.000837582	0.0306953	-0.124567	0.0352214	0.031642	0.070162	0	0.00724286	0	0	0.0375329	0	0	0	0.016015
AATF	0.0107883	-0.160723	-0.0706693	-0.305338	-0.0835549	0.0441031	-0.126935	-0.112315	-0.151626	-0.213849	-0.264822	-0.396146	-1.11474	-1.3754	-0.378259	-0.547076	-0.612389	-0.572902	-0.585031	0.128654	0.0655571	-0.0106224	-0.0663771	-0.316759	-0.374797	-0.459674	-0.455194	-0.441413
AATK	0.182445	0.23985	0.206609	0.388406	0.138148	0.0728025	0.0619735	0.216262	0.111268	0.202738	0.206433	0.279074	0.109964	0.0974142	0.00727722	0.227927	0.116835	0.0455841	0.0700363	-0.151755	-0.0752862	0.0168964	-0.0779443	0.0251863	-0.048286	0.0788589	0.248369	0.0654129
AB015752.1	-0.0724261	0.249515	-0.123015	-0.0201343	-0.123015	-0.0988687	-0.0533935	0.0485173	0.0848537	-0.0988687	-0.0553912	0.0266823	2.06472	-0.0751819	-0.0998746	-0.0998746	-0.0998746	0.136802	0.126434	0.133684	0	0	0	0	0.0818769	0	0.430923	0.0978431
ABALON	-0.0209662	-0.122487	-0.148446	-0.0188399	0.0352609	-0.0799333	0.00642362	-0.0201658	0.161744	-0.0861187	-0.0834072	0.378221	-0.0839896	-0.158984	0.0139372	0.0684207	0.372031	0.166799	0.337726	0.150472	0.191695	0.150076	0.0999621	0.0734155	0.169733	0.162344	0.343498	0.0935507
ABAT	-0.0832339	-0.265308	-0.268084	-0.212347	-0.475403	0.56495	0.845917	0.865605	0.707522	0.695017	0.589431	0.577707	1.09318	1.01616	0.813762	1.56671	1.62627	1.86222	2.17851	0.0628224	0.520768	0.768095	0.774755	0.904367	1.11705	0.896509	0.64179	0.902544
ABCA1	0.392822	0.254954	0.00926851	0.177212	-0.647303	-0.364502	0.391346	0.171781	0.579876	0.121249	0.0919336	1.00773	2.97325	3.07317	0.672686	1.36996	1.67451	2.0944	2.48872	0.370729	0.86548	1.35514	1.36142	1.46723	1.99915	2.20867	3.33301	2.67975
ABCA10	0.161172	0.251541	0.172049	0.0315942	0.0179852	0.169892	0.00541083	0.179185	0.0332273	0.0525953	0.0173215	0.070582	0.275037	0.0995551	-0.243358	-0.137354	0.130215	0.412502	0.0435873	-0.0943703	-0.112019	0.114703	-0.150253	0.0141733	-0.0439383	-0.143	0.112075	-0.132009
ABCA12	-0.044886	-0.0845692	-0.0849096	-0.128977	-0.0508576	-0.0124054	0.0252657	0.0388545	0.0575739	0.00885087	0.0101346	0.0383141	0.15252	0.0610199	0.227464	0.0655227	0.213115	0.0695915	0.2343	-0.00114123	0.0138052	0.0306944	0.00990119	0.02077	0.107471	0.0535546	0.333171	0.106928
ABCA13	0.0464053	0.0371134	0.0129054	-0.0461069	0.0142427	-0.0683474	-0.0313824	-0.0917621	-0.0545137	-0.0917637	-0.0988429	-0.0952491	-0.083904	-0.0795534	0.0940544	0.019992	0.146498	0.0113737	0.00648031	-0.0659208	-0.0563749	-0.0906568	-0.101228	-0.090798	-0.0905121	-0.0556283	-0.0324389	-0.0309769
ABCA2	0.827677	0.195047	0.170801	0.447669	0.203366	0.495964	0.554307	0.670039	0.766928	1.544	1.19061	1.95649	2.22337	2.31703	1.02322	0.836571	1.17801	1.11726	1.06551	0.511326	0.48339	0.67	0.415159	0.473819	0.686312	0.602605	0.989535	1.00531
ABCA3	0.0385313	-0.184007	-0.18974	-0.273257	-0.262096	0.113182	0.123145	0.0164447	0.181873	0.944124	0.687522	1.53208	3.43918	4.54389	0.569872	0.31067	0.767791	0.889513	1.02723	-0.00850655	0.0263149	-0.0445832	0.0779955	-0.0493432	0.0429081	-0.0120785	0.519286	0.0738011
ABCA4	0.00334552	0.0806202	0.0950333	0.0555376	-0.0200406	0.0771388	0.143093	0.00221456	0.0833601	0.0811348	0.0514336	0.00817569	0.25448	0.839624	0.0799736	0.272623	0.197559	0.27587	0.61241	0.0817753	0.00485667	0.0753348	-0.0589844	0.0844789	0.0101373	-0.0836592	0.449058	-0.0178328
ABCA5	0.769104	0.658767	0.769724	0.580277	-0.192057	0.181084	0.712192	0.85641	0.519988	0.511469	0.428334	1.17182	0.543269	0.573851	0.535849	0.468842	0.434931	0.408804	0.776265	0.084495	0.132734	0.336848	0.336431	0.830163	1.19073	1.29463	2.13474	0.633272
ABCA6	0.0340519	0.0662235	0.0442046	0.0270823	-0.0305817	-0.0109243	0.0448124	0.0649198	0.0549165	0.0398947	0.126538	0.2063	0.61611	0.469128	0.0352946	0.0361476	0.142829	0.0201075	0.278027	-0.0318773	0.014016	-0.00685002	-0.0179122	0.134655	0.0855586	0.0285301	0.400666	0.211243
ABCA7	0.276304	0.484436	0.588752	0.803092	0.491799	0.163302	0.598666	0.36223	0.720131	0.832479	0.702607	2.14539	1.63413	2.29777	0.998998	1.09039	1.85195	1.319	2.40987	-0.00368228	0.517732	0.730372	0.779968	0.937995	1.39802	1.46271	1.65872	1.59383
ABCA8	0.197881	0.216765	0.145098	0.233892	-0.0566289	0.116991	0.31718	0.223901	0.478364	0.40899	0.271618	0.437649	3.68745	3.10929	0.614892	0.640588	1.1741	1.5	2.33718	0.119358	0.16858	0.429096	0.586361	0.711605	1.15597	0.884046	1.28374	1.5207
ABCA9	0.0578974	0.0556776	-0.0157289	-0.00975725	-0.0259052	-0.0207273	0.0689966	0.0484281	0.0293362	0.157942	0.0352824	0.237379	0.216873	0.542597	0.0845371	0.0852172	0.181992	0.101304	0.571252	0.0105866	0.0622995	-0.0806249	0.00818511	0.0382755	0.0857511	0.308156	0.218312	0.0725001
ABCA9-AS1	0	0.0369251	0.000540393	0	0	0.0246144	0	0	0	0.029063	0	0	0	0.0401443	0	0.106095	0	0.000584552	0	0	0	3.1e-05	0.0712489	0	0	0	0.0013215	0
ABCB1	0.350043	0.103986	0.430733	0.158071	-0.2022	0.0115017	0.0866935	0.762863	0.895144	1.05598	0.913021	1.4326	2.35848	2.46115	0.307492	-0.0505264	0.0629396	0.486439	0.142892	0.16073	0.251808	0.180502	0.16159	0.236042	-0.102138	0.0181791	0.811242	-0.056118
ABCB10	0.518739	0.103302	0.201136	-0.180658	0.00164816	-0.279908	-0.255477	-0.238943	-0.368988	-0.310645	-0.390879	-0.710835	-0.787443	-1.04928	-0.461763	-0.414258	-0.498123	-0.536671	-0.835933	0.466604	0.422252	0.251512	0.0913523	-0.0538624	-0.090487	-0.114123	-0.404704	-0.667795
ABCB11	0	0	0	0	0	0	0	0	0	0	0	0.0383726	0.0175752	0.0101121	0	0.0263907	0	0.0167624	0	0	0	0	0	0	0	0	0	0
ABCB4	0.135058	0.159067	0.0927033	0.22492	0.152052	0.00921332	0.0190701	0.039199	0.0503421	0.00858753	0.0276435	0.0447401	0.151821	0.247517	0.0150969	0.0975151	0.103035	-0.0370164	-0.0370164	0.012831	0.0679105	-0.00858354	0.0251061	0.0674647	0.0224597	0.023857	0.0296289	0.00481988
ABCB5	0.085722	-0.00284302	0.00975685	0.0191036	0.0391563	-0.0143773	0.00271649	-0.0166836	-0.0103549	-0.0166836	-0.000155921	0.0137103	1.1068	1.91903	-0.0835833	0.00683023	-0.0806046	-0.102275	-0.0810586	0.065553	0.0119983	-0.00214985	0.0527638	0.00169955	-0.00336748	0.0526141	0.0230611	0.0503408
ABCB6	0.024832	0.0101983	0.122661	0.509737	0.393291	0.0652346	-0.150918	-0.0671578	0.134566	0.529082	0.223043	0.579804	1.22487	1.23689	0.594185	0.120251	0.67203	0.122642	0.397705	0.0893937	0.267012	0.264062	0.35817	0.274426	0.240124	0.605488	0.931107	0.339333
ABCB7	0.120065	-0.0204189	0.227622	-0.199405	-0.300405	-0.129826	-0.254593	-0.187853	-0.335667	-0.129247	-0.223502	-0.541514	-0.817439	-1.21244	-0.101331	-0.28049	-0.322991	-0.500254	-0.526051	0.136647	0.283839	0.361572	0.215928	0.333175	0.322182	0.200019	0.019679	0.0351159
ABCB8	0.157022	-0.334842	-0.29704	-0.0884541	-0.148614	-0.0226669	-0.0490537	-0.0467725	-0.0697967	0.124889	0.0917341	0.0798446	-0.115916	-0.222957	-0.256301	-0.200543	-0.129116	-0.0941916	-0.276526	0.15801	0.273628	0.286527	0.199852	0.122589	0.167561	-0.0646594	-0.285954	-0.242302
ABCB9	0.208812	-0.25347	-0.417185	-0.212795	-0.452977	0.021198	0.102728	0.0826136	0.0209609	-0.165187	-0.0982685	-0.216722	-0.330891	-0.548499	0.522328	0.589394	0.560442	0.596856	0.339325	0.466525	0.64872	0.831264	0.788401	0.749591	0.727601	0.652188	0.707451	0.66586
ABCC1	0.329825	0.0533851	0.0994899	0.665436	0.059417	-0.136622	-0.13057	-0.247801	0.0318671	0.154946	0.149714	0.336236	0.452984	0.460861	0.338614	0.231812	0.413337	0.193772	0.426946	0.824804	0.933841	1.28352	1.28727	1.29953	1.67876	1.5008	1.60619	1.37076
ABCC10	0.468045	-0.0191364	0.10058	0.259957	0.119691	0.308453	0.138089	0.443484	0.311365	0.734128	0.342527	0.149427	0.432928	0.0815814	0.243865	0.353613	0.537846	0.223102	0.263842	0.343293	0.316177	0.30183	0.264017	0.247147	0.154957	0.201392	0.0762516	0.0484602
ABCC11	0.0313671	-0.0186919	0.00531901	-0.0188753	-0.0328042	-0.0354183	0.0264912	0.0246332	-0.00440251	-0.0892784	-0.0952808	0.0379766	-0.022393	0.00217363	0.0443542	0.153315	0.264654	0.338997	0.136283	0.015779	0.0100968	0.0247224	0.020617	-0.0298593	0.0130785	-0.00764239	-0.0902404	0.00275251
ABCC12	-0.0134354	-0.0185795	-0.0185795	-0.0185795	-0.0185795	0	0	0	0.00419649	0	0	0	0	0	0.013946	0.0257056	0.0112946	0.0283947	0.0103143	0.00585303	0	0	0	0	0	0	0	0
ABCC2	0.0871648	0.0607238	0.0584484	0.130021	0.00101354	0.0393765	0.0158283	0.0385304	0.0667635	0.0204545	0.026544	0.16275	0.214113	0.185611	-0.106077	-0.165068	-0.0207498	-0.070518	-0.265305	0.0757778	0.0874103	0.187115	0.0115651	0.0191008	0.0120855	0.0933001	0.14687	0.0371226
ABCC3	0.450654	0.544093	0.66696	1.24269	0.706008	-0.346823	-0.672763	-0.528676	-0.196594	0.178787	0.17595	0.0132501	-0.358167	-0.452023	1.17589	0.11927	0.398606	-0.162226	-0.0920749	-0.389707	-0.162297	0.46547	0.482087	0.298822	0.80847	0.71082	1.29882	0.708961
ABCC4	0.306899	0.47798	0.412533	0.577231	-0.185001	-0.0193513	0.129983	0.101345	0.312644	0.879857	0.846819	1.2875	2.03762	1.34112	0.46441	0.625768	0.885365	0.946609	1.32479	0.498271	0.500611	0.967626	1.09898	1.34661	1.93843	1.99307	1.98611	2.2526
ABCC5	0.158903	0.3389	0.445579	0.725855	0.218232	0.396162	0.382707	0.455784	0.564666	0.884391	0.742917	0.873105	1.61561	1.39396	0.288828	0.448182	0.899426	0.532549	1.05401	0.471634	0.489934	0.770455	0.641254	0.629293	0.861631	0.782961	0.765685	0.64418
ABCC5-AS1	0	0	0	0	0	0	0	0	0	0	0	0	0	0	0.151352	0	0	0	0	0	0	0	0	0	0	0	0	0
ABCC6	0.204758	0.0262009	0.0759559	0.344751	-0.40388	0.179743	0.296814	0.504198	0.625422	1.33993	0.779679	1.00477	2.308	2.24166	0.98842	1.36148	1.84775	1.624	2.28692	0.105097	0.736659	0.984264	1.05233	1.20653	1.74212	1.737	1.85075	2.06133
ABCC8	0.0036594	0.00371084	-7.21342e-07	-5.24176e-06	0.00357231	0.00595009	-0.00347225	0.0101667	0.00780001	-0.00019373	0.000551497	0.00411541	-0.000433627	0.0162247	-0.0771607	-0.0500245	-0.0401892	-0.0608743	-0.0575811	0.00476253	0.00650131	0	0.00544856	0	0	0	0.00526962	0.00483638
ABCC9	0.235015	-0.0877709	0.109125	-0.470341	-0.0486678	-0.262048	-0.34774	-0.598272	-0.841877	-0.927292	-0.765667	-1.68983	-1.54304	-1.60636	-0.513598	-0.403992	-0.477958	-0.893743	-1.11627	0.369597	0.568974	0.543757	0.467102	0.350077	0.113739	-0.0367982	-0.260209	-0.705225
ABCD1	0.428907	0.107953	0.0444804	0.304193	0.0458552	0.433242	0.385267	0.413859	0.514697	0.471546	0.46792	0.380288	1.09256	0.848273	0.6425	0.678077	0.557947	0.540754	0.326971	0.330393	0.306908	0.667341	0.635372	0.51969	0.704384	0.444841	0.403729	0.552184
ABCD2	-0.00713613	0.000238705	0.0212861	0.00229808	-0.00066886	0.00193746	0.00253873	0.00648325	-0.000581251	-0.00629512	0.0032311	0.0141925	6.26183	7.61764	0	0	0.0372352	0.0177374	0.0182811	0	0	0.00732386	0	0.00467844	0	0.00416436	0	0.0157879
ABCD3	0.429993	0.089926	0.161764	-0.430166	-0.620979	-0.0485179	0.146903	0.0695727	-0.171255	-0.12011	-0.257752	0.188905	0.0375322	-0.116116	0.00177343	-0.201362	-0.146066	-0.0369641	-0.135018	0.23933	0.228339	0.160456	0.0790233	0.0542284	0.00213258	-0.096639	-0.291538	-0.062357
ABCD4	0.227955	0.149201	-0.0403987	0.453361	0.160414	-0.20109	-0.0541628	-0.0775564	-0.236774	-0.0184534	0.0933429	0.0531041	0.0744005	0.217112	0.0125697	0.00201027	0.340673	0.0679857	0.44771	0.0691541	0.308383	0.5026	0.496031	0.387125	0.681793	0.541441	0.973717	0.345616
ABCE1	0.36309	0.000721737	0.170927	-0.828627	-0.608647	-0.178359	-0.0823388	-0.238442	-0.670924	-0.711805	-0.488996	-0.799253	-1.57343	-1.816	-0.356617	-0.639228	-0.611223	-0.507605	-1.16047	0.214928	0.0952007	-0.0660451	-0.103014	-0.165811	-0.397804	-0.39563	-0.955549	-0.415649
ABCF1	0.130051	-0.0750804	-0.0311062	-0.253554	-0.129273	-0.048316	-0.184126	-0.208809	-0.274708	-0.271397	-0.31306	-0.604542	-1.15021	-1.43355	-0.243188	-0.255839	-0.291645	-0.343905	-0.430806	0.354828	0.301026	0.202482	0.164162	0.0872749	0.194209	0.111536	-0.042102	-0.0133249
ABCF2	-0.148955	-0.174966	-0.154182	-0.337444	-0.0139572	-0.0681278	-0.0933565	-0.126849	-0.0627633	-0.03164	-0.0815927	-0.210485	-0.546914	-0.845627	-0.107491	-0.221324	-0.361245	-0.273997	-0.383244	0.338026	0.247966	0.233469	0.0773485	0.00139231	-0.0369275	-0.287196	-0.274476	-0.00337421
ABCF3	-0.0131404	-0.0411592	0.0267864	0.0309709	0.0765612	0.181829	0.14983	0.135705	0.0890058	0.176092	0.0895056	0.0950506	-0.0282955	-0.335284	0.479294	0.319844	0.401618	0.369676	0.285167	0.26734	0.397612	0.330446	0.368008	0.128984	0.236849	0.152512	0.139439	0.29143
ABCG1	-0.0028306	-0.00262165	-0.00832092	-0.0110228	-0.0116285	-0.057102	-0.029791	-0.0312217	-0.0616257	-0.0296103	-0.0348852	0.010367	0.0177173	0.106473	0.078011	-0.0497608	0.099937	-0.00753388	0.104806	0.103889	0.138756	0.0969448	0.102192	0.0945521	0.0968016	0.0993456	0.594772	0.245691
ABCG2	-0.0579711	0.0224445	-0.00348029	-0.106725	-0.236215	-0.25473	-0.321483	-0.618148	-0.541013	-0.582032	-0.446993	0.408711	0.616438	0.471163	0.231051	0.236383	0.690056	0.210469	0.119395	-0.0812742	0.0249899	-0.0362832	-0.215815	-0.090129	-0.236309	0.112322	0.224842	0.267217
ABCG4	-0.0451782	0.0667016	0.0178599	0.197963	-0.0761124	0.0260784	-0.0633535	-0.0132756	0.0830936	-0.0153943	-0.026549	-0.00663127	-0.0464395	0.00938298	0.0198624	-0.116586	0.160929	-0.144358	-0.0823407	0.0432217	-0.0179852	0.241987	0.114355	0.0536122	0.129381	0.103203	0.0807545	0.257683
ABCG5	0.00627021	8.09531e-05	0	0	0	0	0	0	0	0	0	0	0	0	0.00479598	0.0264619	-0.014777	0.0477009	0.0425029	0.0109844	0.0172679	0.0192933	0.0098557	0	0	0.0162068	0.0143767	0.0126844
ABCG8	0.0189303	-0.00464646	-0.000831957	0.0084401	-0.000968953	0.0238901	0.05383	0.0230849	0.0252621	0.0168963	0.0266085	-0.0095824	0.0203943	0.0143903	0.000136793	-0.00936475	-0.0438725	-0.0386175	0.0123735	0.0181567	-0.00150031	0.0294954	0.0423884	-0.00319185	-0.00985173	-0.00717228	-0.0156763	-0.0383485
ABHD1	0.114696	0.0906825	0.0211361	0.0563897	-0.00158633	0.00261079	0.0190425	0.0794325	0.0150868	0.0970837	0.0613175	0.00812447	0.1096	0.136829	0.258893	0.13869	0.157693	0.200503	-0.00767992	0.0492775	0.0243967	0.108187	-0.0105638	0.10767	0.249931	0.0542902	-0.0596641	0.0266119
ABHD10	0.0199972	0.00966538	0.000310995	-0.427052	-0.259549	-0.0257746	-0.186467	-0.243768	-0.374244	-0.475198	-0.400504	-0.561893	-0.781687	-0.878802	-0.430142	-0.437455	-0.632567	-0.335674	-0.758574	0.177245	0.220366	-0.0349125	-0.147633	-0.0697478	-0.324166	-0.392409	-0.83065	-0.410534
ABHD11	-0.246527	-0.384002	-0.367972	-0.704048	-0.154336	-0.0274834	-0.173261	-0.154091	-0.288149	-0.348128	-0.442916	-0.515736	-1.39653	-1.89182	-0.710258	-0.660581	-1.08945	-0.611616	-1.18628	0.10572	-0.0510562	-0.274547	-0.554759	-0.565359	-0.896446	-0.983888	-1.41146	-0.998598
ABHD12	-0.140862	-0.210327	-0.342148	-0.389736	-0.0441046	0.380335	0.412124	0.517789	0.602879	0.82701	0.775951	0.901512	0.590584	0.512569	0.353611	0.690871	0.729527	0.846126	0.937736	0.51048	0.485731	0.334508	0.203322	0.098907	0.130528	0.168394	0.307006	-0.111343
ABHD12B	-0.0799841	0.0175201	0.0384405	-0.0167109	-0.0308448	0.0805403	-0.0806825	-0.0137796	-0.020032	-0.0289547	-0.0482625	-0.0400836	-0.0705307	-0.0153043	-0.245631	-0.888562	-0.441008	-0.490709	-0.225993	0.0496934	-0.0394599	-0.0288823	-0.0427221	-0.00547287	0.175119	-0.125702	0.182342	-0.0909697
ABHD13	0.309542	0.0010656	-0.0466004	-0.15063	-0.410445	-0.0643643	0.028154	-0.0922854	-0.182491	-0.183367	-0.235394	-0.234516	-0.232564	-0.490571	-0.0700816	-0.0522563	-0.0766745	-0.0472799	0.0359179	0.0348817	0.0104881	0.0646988	0.0489076	0.131392	0.123223	0.150691	0.233903	-0.172257
ABHD14A	-0.103499	-0.034255	-0.00750762	0.498089	0.240561	0.237553	0.442646	0.573075	0.543206	0.638532	0.595489	0.985347	0.867097	1.06894	0.866716	0.734593	0.758757	0.91527	1.02462	-0.31429	-0.20468	0.0657458	0.213521	0.247453	0.206342	0.199617	0.119143	0.374179
ABHD14A-ACY1	-0.00497971	0.0291283	0.275456	0.202364	0.00301348	0.220373	0.0442857	0.207294	0.318391	0.0723852	-0.0108095	0.42235	-0.0945789	-0.295461	0.0167749	0.12258	0.264055	0.189852	0.42114	0.0839602	0.530396	0.242283	0.530298	0.126697	0.927316	0.34391	1.0978	0.19721
ABHD14B	0.143942	0.236752	0.107746	0.525526	0.160329	0.284788	0.349736	0.518141	0.633061	0.277153	0.248002	1.10518	1.09872	1.23919	0.64144	0.790618	1.01451	1.16681	1.57497	0.175878	0.202486	0.398389	0.523462	0.524425	0.622293	0.729374	0.987452	0.836079
ABHD15	0.351082	0.0342567	0.0934537	0.118745	0.145192	-0.0117094	0.121581	0.0680751	0.233462	0.307109	0.262779	0.254419	0.755457	0.892686	0.489638	0.578013	0.686881	0.446727	0.801016	0.447363	0.407755	0.72493	0.561954	0.680472	0.664163	0.677529	0.938226	0.601485
ABHD15-AS1	0	0	0	0	0	0	0	0	0	0	0	0	0	0	0	0	0	0	0	0	0.43846	0	0	0	0	0	0.455923	0
ABHD16A	-0.0322932	-0.0537209	-0.102557	0.109861	0.0203576	0.188776	0.143467	0.225008	0.202516	0.35932	0.260981	0.819241	0.69354	0.692718	0.4092	0.312588	0.511003	0.45463	0.664697	0.131388	0.169395	0.247575	0.183115	0.133001	0.194562	0.0527925	0.572341	0.284841
ABHD16B	-0.012345	-0.012345	0.00306867	-0.012345	-0.012345	0	0	0.0153295	0.0119284	0	0	0	0.0505455	0.00756243	-0.00293644	0.000733549	0.00246461	-0.00137037	-0.00260008	0	0	0	0	0	0	0	0	0
ABHD17A	0.53686	-0.119505	-0.134591	0.0898337	0.0534676	0.0451199	0.0984153	0.236892	0.144779	0.202256	0.178311	0.103709	0.0558329	-0.464535	0.0971199	0.274765	0.226481	0.257763	0.388222	0.542661	0.426264	0.432502	0.445039	0.406261	0.360173	0.30336	0.209327	0.342219
ABHD17B	0.141521	0.0697186	0.0424994	-0.184008	-0.119524	-0.0865424	-0.23326	-0.197678	-0.230541	-0.405889	-0.212623	-0.487444	-0.267499	-0.585475	-0.144219	-0.105124	-0.0883647	-0.249162	-0.158886	0.293256	0.344223	0.387974	0.35772	0.333175	0.356783	0.290276	0.183186	0.300427
ABHD17C	0.279048	0.0775814	0.145079	0.337236	0.114197	-0.409992	-0.165886	-0.202872	-0.00125563	-0.0165209	0.0614949	-0.207509	0.010307	-0.459112	0.171425	0.346156	0.933967	0.312227	0.917413	0.458554	0.355199	0.563677	0.590913	0.5906	0.822697	0.952666	0.248892	-0.0395579
ABHD18	0.32097	0.330717	0.41407	0.116645	-0.0566724	-0.139902	0.010076	-0.0428232	-0.194459	0.022851	0.0715044	-0.129995	-0.236598	-0.109957	-0.0715887	-0.272702	0.206228	-0.0523081	0.00782604	0.189831	0.169313	0.368932	0.440867	0.328115	0.257982	0.594358	0.398091	0.455931
ABHD2	0.0802542	-0.0177897	-0.203078	-0.147848	-0.183155	0.112923	-0.0082522	-0.0196302	-0.100086	-0.371113	-0.357317	-0.18543	0.541931	0.305311	-0.665687	-0.517801	-0.176948	0.409746	0.144127	0.62918	0.354235	0.331407	0.221789	0.239405	0.606347	0.413803	0.506683	0.709438
ABHD3	0.155246	-0.187923	0.0460658	-0.512857	-0.370208	-0.316785	-0.502816	-0.557094	-0.575676	-0.471867	-0.4703	-1.21927	-0.717758	-0.821599	-0.716108	-1.00488	-1.13836	-0.929351	-1.26669	0.0385654	-0.148923	-0.422096	-0.465968	-0.639943	-0.603211	-0.665721	-1.17186	-1.17525
ABHD4	-0.138134	-0.0603084	-0.10103	0.363532	-0.172474	0.236016	0.402129	0.508834	0.577647	0.740708	0.59112	0.990013	0.920265	1.04835	0.761368	0.810449	1.04929	0.402246	1.54628	0.159925	0.330375	0.688557	0.870855	0.927575	1.55153	1.43199	2.48483	1.33611
ABHD5	0.0430559	-0.128873	-0.0787378	-0.675617	-0.268626	-0.263972	-0.207119	-0.40381	-0.711022	-0.663996	-0.793068	-1.30511	-1.75507	-2.26238	-0.259409	-0.082949	-0.100805	-0.0288679	-0.216283	-0.0852259	0.131074	0.188544	0.204687	0.188931	0.0247903	0.164181	-0.25912	0.165
ABHD6	0.0418443	0.0513983	0.157189	0.0143255	0.162776	-0.0376086	0.0819376	0.0209275	0.019819	0.182914	0.147186	0.187231	0.251799	0.58776	0.181721	0.58644	0.44458	0.326971	0.244541	0.110447	0.28527	0.231456	0.109479	0.0732926	0.298098	0.33832	0.950509	0.685864
ABHD8	0.455671	0.207427	0.072588	0.584727	0.234061	0.103138	0.181898	0.259904	0.330209	0.476537	0.449759	0.136768	0.229571	0.410697	0.0709553	0.408979	0.581498	0.289339	0.706039	0.45	0.518584	0.792559	0.948484	1.05167	1.13299	1.02728	1.27173	1.18168
ABI1	0.0394498	0.0681001	0.0350403	-0.132483	-0.281993	0.172281	0.230385	0.140827	-0.0070363	-0.0431517	0.0677069	-0.465937	-0.567483	-1.06306	-0.0370869	0.173358	-0.0611904	0.0554015	-0.196891	0.0982223	0.0962273	-0.00279138	0.00349849	-0.0773418	-0.0512852	-0.161779	-0.178526	-0.352561
ABI2	0.149397	-0.227269	0.0599458	0.104291	-0.0483422	-0.101898	-0.274658	-0.35652	-0.18082	-0.109859	-0.228097	-0.771206	-0.359231	-0.469532	-0.285879	-0.418673	-0.125424	-0.481704	-0.655804	0.399934	0.363281	0.266166	0.177435	0.167087	0.196838	-0.049393	0.05952	-0.177755
ABI3	-0.331846	-0.910687	-0.847174	-0.87018	-0.722687	-0.377366	-0.647149	-0.733955	-1.04324	-0.934349	-0.913058	-2.21596	-2.3613	-2.41738	-1.90159	-2.12213	-2.05074	-2.36739	-2.37957	0.316843	0.643293	0.2953	0.122844	-0.127347	-0.338442	-0.600063	-1.2148	-1.24514
ABI3BP	0.564344	-0.265341	-0.588117	-0.222767	-0.71859	0.502838	1.12321	0.97882	0.890598	0.103001	0.280141	0.451853	-0.386223	0.922304	-0.45265	-0.359442	-1.03223	-0.72416	-0.694964	-0.258591	-0.68093	-0.592337	-0.468394	-0.527207	-0.408677	-0.483356	0.485706	-1.26818
ABL1	0.300793	-0.0551636	-0.100198	0.182848	-0.0219809	-0.0193923	-0.0337907	-0.158974	-0.00589708	0.063822	0.0269704	-0.266371	-0.322962	-0.430396	-0.125234	0.0251445	-0.106773	-0.125093	-0.0868283	0.770175	0.746234	0.908815	0.780974	0.730347	0.915975	0.578598	0.558683	0.61459
ABL2	0.52175	0.251365	0.200023	-0.353278	-0.0436208	0.317781	0.000540377	-0.0746129	-0.16598	-0.0923736	0.122852	-0.2493	-0.870437	-1.18684	-0.384954	-0.298205	-0.392093	-0.761116	-0.964489	1.00818	0.878457	0.76356	0.548672	0.374331	0.55708	0.367096	0.421106	0.225711
ABLIM1	-0.0121641	-0.46274	-0.395362	-0.395836	-0.41867	0.292514	0.354001	0.251609	0.313963	0.171358	0.274681	0.291301	0.0138761	0.442346	0.257467	0.3355	0.34946	0.00882951	0.471504	0.549109	0.494476	0.365543	0.32782	0.226809	0.491826	0.406049	0.693308	0.00468383
ABLIM2	-0.0309432	-0.0390311	-0.0243862	-0.0228486	-0.0301494	0.0554006	0.212987	-0.054148	-0.00374928	-0.0379377	-0.0675007	0.0879087	-0.0380175	0.113492	0.0850377	0.0551793	0.176673	0.121459	0.305578	0.015034	-0.0172487	0.0307722	-0.0475692	-0.0104699	0.0358915	0.0367288	-0.0414532	0.0320048
ABLIM3	-0.210078	-0.462655	-0.434941	-0.451536	-0.391792	0.260679	0.288613	0.254517	0.33611	0.294741	0.213808	0.798031	0.676639	0.420177	0.520995	0.41216	0.439228	0.577088	0.425793	0.425486	0.396345	0.624697	0.53937	0.515206	0.629767	0.393157	0.862681	1.07696
ABO	0.0113024	-0.00278786	0.0177733	0.00319707	-0.00984008	0.01152	-0.000430083	0.0212289	0.0344189	0.00655694	-0.00294669	0.0039778	0.00607929	0.0206782	-0.0501534	-0.122722	-0.0556196	-0.116575	-0.116209	0.0466869	0.0318494	0.0230132	0.0098336	0.00668505	0.00715971	0.0144386	-0.00385163	0.0535872
ABR	0.138412	-0.0963819	-0.22769	0.104656	-0.0453657	-0.0464537	-0.100032	-0.215772	-0.227616	-0.121513	-0.156138	-0.405904	-0.440753	-0.485292	-0.0527417	-0.0937403	-0.00772306	-0.175161	0.118264	0.594221	0.620613	0.737767	0.608589	0.596703	0.682838	0.61884	0.942438	0.566275
ABRA	0.000119983	0.00698908	-0.000238094	-0.000238094	-0.000238094	0.0372361	0.00683823	0	0	0	0.00767547	0.00690807	0	4.90998	-0.057554	-0.0577329	-0.0361193	-0.0577329	-0.0379645	0	0	0.0221677	0.0143669	0.00386934	0.00929485	0	0	0.000457352
ABRACL	-0.0483728	-0.148904	-0.0460893	-0.447724	-0.0743497	-0.349329	-0.412154	-0.447963	-0.747626	-1.21763	-1.18902	-1.81916	-2.57144	-3.2356	-0.514488	-0.577095	-0.72609	-0.663939	-0.75215	-0.295986	-0.325965	-0.388868	-0.235687	-0.218989	-0.294787	-0.19825	-0.321109	-0.497704
ABRAXAS1	0.475038	0.25807	0.32858	0.210892	-0.390042	-0.213235	0.0362289	-0.100178	-0.368615	-0.33563	-0.286954	-0.363632	-0.541514	-0.923843	0.150952	-0.0718432	0.225318	0.232874	0.0578124	0.0334819	0.138365	0.254849	0.477244	0.573576	0.644448	0.752858	0.997483	0.829465
ABRAXAS2	0.252289	0.195099	0.319306	-0.102332	-0.193174	0.0829081	-0.00190681	-0.0810556	-0.182089	0.0185555	-0.0305341	-0.319262	-0.00504263	-0.180283	0.139406	0.0576648	0.0526152	-0.00518987	-0.0899905	0.164383	0.121155	0.128089	0.157779	0.167508	0.0494074	-0.00854135	-0.0502736	-0.0767763
ABT1	-0.260139	-0.284802	-0.235817	-0.285275	-0.0580258	-0.105809	-0.25063	-0.243567	-0.397676	-0.271309	-0.322268	-0.750437	-1.35066	-1.74493	-0.497501	-0.538685	-0.680503	-0.789829	-0.919679	0.155185	0.146315	0.153741	0.00694529	0.00394726	-0.115983	-0.234125	-0.540582	-0.373404
ABTB1	0.0239105	-0.223636	-0.290687	0.310106	-0.18818	0.0935498	0.124254	0.145598	0.0670106	0.243128	0.329392	0.585952	0.463042	0.230821	0.242601	0.120877	0.447468	0.299318	0.834655	0.207172	0.399599	0.648984	0.721532	0.712836	0.963616	0.832351	1.435	0.680419
ABTB2	0.0248117	-0.371757	-0.515835	-0.53449	-0.602862	0.420526	0.502367	0.544936	0.723643	0.642155	0.578644	1.28259	1.49073	1.38444	0.636669	0.400486	0.537129	0.592622	0.543013	0.551135	0.54333	0.536952	0.437397	0.384082	0.404205	0.325812	0.408252	0.73491
AC000032.1	-0.065149	-0.065149	-0.065149	-0.065149	-0.065149	0	0.157357	0.0662813	0	0	0	0	0	0	-0.324603	-0.160076	-0.448917	-0.20105	-0.35942	-0.0617426	0.0331168	-0.0617426	-0.0617426	-0.0617426	-0.0617426	-0.0617426	-0.0617426	0.0171695
AC000035.1	0	0	0	0	0	0	0	0	0	0	0	0	0	0	0	0	0	0	0	0.162058	0	0	0	0	0	0	0	0
AC000036.1	0	0	0.0108553	0.0114284	0	0	0	0.0203798	0	0	0	0	0	0.0620881	0.0514461	0.0604115	0.061145	0.0285006	0.0308318	7.8e-07	3.03e-06	0	0	0	0.0242009	0	0	0
AC000058.1	0	0	0	0	0	0	0	0	0	0	0	0	0.0405396	0	0	0.343854	0	0.231545	0.126484	0	0	0	0	0.0751254	0	0	0.0737561	0.0691664
AC000061.1	0	0	0	0	0	0	0	0	0	0	0	0	0	0	0	0	0.230977	0	0	0	0	0	0	0	0	0	0	0
AC000067.1	0	0.184262	0	0	0	0	0	0	0	0	0	0	0	0	0	0	0	0	0	0	0	0	0	0	0	0	0	0
AC000068.1	-0.0745191	0.0112257	0.00877731	-0.119982	-0.0835529	-0.210253	-0.152276	-0.172144	-0.229373	-0.213483	-0.221403	-0.232368	-0.265618	-0.268473	-0.0891543	-0.145569	-0.118242	0.058171	-0.0446284	0.234465	0.108248	0.116994	0.151254	0.183763	0.103045	0.086131	0.082615	0.109027
AC000068.2	-0.0572114	-0.129862	-0.129862	-0.129862	0.0101728	-0.142417	-0.0782215	-0.0795619	-0.142417	-0.0887495	-0.0671653	-0.142417	-0.0889315	-0.0949652	-0.298243	-0.274833	-0.138494	-0.297519	-0.293997	-0.128228	-0.211109	-0.114558	-0.116988	0.0396592	-0.211109	-0.211109	-0.211109	-0.123709
AC000068.3	0.0766117	0.338609	0.137976	0.00630304	0.101272	0.0124757	0.0605505	0.0786592	0.0610038	-0.0313663	0.0630488	0.0523548	-0.0365021	0.0733196	0.493846	0.000427792	0.000710717	-0.00101979	0.00232447	-0.0494241	-0.131358	0.217851	-0.0549083	-0.0451297	-0.0209261	-0.248783	-0.248783	0.102337
AC000093.1	0.267774	-0.120031	-0.0933742	0.18083	0.242446	0.0151228	0.00646374	0.0598252	0.126332	-0.14361	-0.155008	0.0299566	-0.0193065	0.0794181	0.162557	-0.0740644	0.454138	-0.20938	0.331393	0.171956	0.331849	0.403052	0.184427	0.296195	0.569889	0.687014	1.72639	0.323617
AC000099.1	0	0.0214816	0.0110926	0	0.0108697	-0.0105725	-0.0105725	-0.0105725	-0.00156329	-0.000873735	-0.0105725	0.122702	-0.0105725	-0.0105725	0.0581108	0.0277905	0.139662	0	0	0.0301586	0.0172009	0.00405867	0.0438154	0.0206056	0.00879066	0.0400089	0.00477627	-0.0109666
AC000123.1	0.0668148	0	0	0	0	-0.056562	-0.056562	-0.056562	-0.056562	-0.056562	-0.056562	-0.056562	-0.056562	-0.056562	0.0629024	-0.289442	0.211639	-0.451226	-0.448382	-0.0570925	-0.0570925	-0.0570925	-0.0570925	-0.0570925	-0.0570925	0.0776576	0.0347271	-0.0570925
AC000124.1	0	0	0	0	0	0	0	0	0	0	0	0	0	0	0	0	0	0	0	0	0	0	0	0	0	0	0	0
AC000372.1	0	0	0	0	0	0	0	0	0	0	0	0	0	0	0	0	0	0	0	0	0	0	0	0	0	0	0	0
AC000403.1	0.175032	0.0844132	0.0420997	-0.0855564	-0.119036	-0.0198597	0.0693836	0.0238155	0.0567057	0.0470129	0.0447377	0.103102	0.447953	0.479047	0.109977	0.0180763	0.0778409	0.131673	0.243921	0.0503997	0.00987173	0.179213	0.0876488	0.122514	0.219576	0.106502	0.041084	0.140328
AC001226.1	0.24416	0.0145871	-0.0455668	-0.0492131	0.00645633	-0.0229866	-0.02188	0.0315355	-0.061555	0.0717465	0.0317868	0.0841277	-0.0837284	0.0143229	0.194757	-0.161626	-0.161626	-0.0296718	0.0893084	0.134133	-0.128038	0.0144007	0.328867	0.143025	-0.0122267	0.0629269	0.0314381	-0.00613553
AC001226.2	0.0627795	-0.0379871	-0.0072111	0.0122879	-0.0235461	-0.103117	0.015943	0.00582832	0.0811151	-0.0965488	-0.0398346	0.1036	0.237087	0.161908	-0.118925	-0.374294	-0.271034	-0.401536	-0.193469	0.0836573	0.246033	0.161259	0.139723	0.148405	0.190296	0.160342	0.493526	0.0326596
AC002056.2	0	0	0	0	0	0	0	0	0	0	0	0	0	0	0	0	0	0	0	0	0	0	0	0	0	0	0	0
AC002064.1	0.033197	0	0	0	0	0	0	0	0	0	0	0	0.0270152	0	0	0	0	0	0	0	0	0.0964561	0	0	0	0	0	0
AC002064.2	0	0	0	0	0	0	0	0	0	0	0	0	0	0	0	0	0	0	0.590743	0	0	0	0	0	0	0	0	0
AC002066.1	0.290318	0.10495	0.263346	0.200254	0.34831	0.242968	0.433971	0.302225	0.325773	0.24018	0.184901	0.373315	0.571839	0.485008	0.542071	0.224559	0.144995	0.828203	0.578532	0.332614	0.0445455	0.171861	0.243913	0.0564163	-0.0397604	-0.290943	-0.423918	-0.0753277
AC002070.1	0	0	0	0	0	0	0	0	0	0.0330027	0.0371031	0.2789	0.0357992	0.128832	-0.0786353	-0.0786353	0.0342876	0.0163949	-0.0786353	-0.0548919	-0.0548919	-0.0548919	-0.0548919	-0.00199876	-0.0548919	-0.0548919	0.0066935	-0.00654368
AC002074.1	-0.0396616	0.727038	-0.319986	0.174757	-0.062923	0.194503	0.15792	0.0278292	0.500285	0.706985	0.266019	0.629645	0.984015	0.497138	1.42382	0.421937	1.40141	0.720041	0.852402	0.544572	0.756414	0.902497	0.115577	0.69069	0.90592	0.726235	1.1397	0.25476
AC002076.1	-0.0986549	-0.0986549	-0.0389323	-0.0986549	-0.0986549	0	0	0	0	0	0	0	0.346149	0	0.129605	0	0	0	0.133186	-0.13698	-0.13698	-0.13698	-0.13698	-0.13698	-0.13698	-0.13698	-0.13698	0.233178
AC002091.1	0	0	0	0	0	0	0	0	0	0	0	0	0	0.028847	0	0	0	0	0	0	0	0	0	0	0	0	0	0
AC002091.2	0	0	0	0	0	0	0	0	0	0	0	0	0	0	0	0	0	0	0	0	0	0	0	0	0	0	0	0
AC002094.2	0.0538097	0.028923	0.00458047	0.0443581	-0.07213	-0.0785171	-0.0762427	-0.0643136	0.00633925	-0.0383474	-0.0614702	-0.00533015	-0.094227	-0.0513339	-0.00276845	-0.00785944	-0.00392309	-0.00586596	-0.00913203	0.0531656	0.201486	0.147018	-0.0409092	0.0174539	0.0861982	0.0965749	0.0414313	-0.0765991
AC002094.3	-0.00238467	-0.00238467	0.00242547	-0.00238467	0.0102222	0	0.0984274	0	0.0575617	0	0	0	0	0	0.0212385	0.0245854	0.0693217	0	0.0245191	-0.0893611	-0.0637844	-0.089318	-0.0956103	-0.0844992	-0.0661214	-0.0929732	-0.0924866	-0.0883665
AC002101.1	0	0	0	0	0	0	0	0	0	0	0	0	0	0	0	0	0	0	0	0	0	0	0	0	0	0	0	0
AC002115.1	0	0	0	0	0	0	0	0	0	0.0369194	0	0	0	0	0	0	0	0	0	0	0.116143	0.0710527	0	0	0	0	0	0
AC002116.2	-0.118988	-0.194416	-0.353712	-0.357863	-0.0232615	-0.367751	-0.634019	-0.540821	-0.366866	-0.469749	-0.493923	-0.745504	-0.651149	-0.745504	-0.863225	-0.972807	-0.634797	-0.972807	-0.972807	0.0667932	0.236089	-0.0279591	-0.265251	-0.236359	-0.379542	-0.519273	-0.642893	-0.524421
AC002127.2	0.0359705	0	0	0	0	0	0	0.0331311	0	0	0	0	0.0218951	0.038978	-0.0664599	-0.0664599	0.164798	0.0138025	-0.0664599	-0.0311726	-0.0311726	-0.0311726	-0.0311726	-0.0311726	-0.0311726	0.00417903	-0.0311726	0.00946624
AC002128.2	0	0	0	0	0	0	0	0	0	0	0	0	0	0	0	0	0	0	0	0	0	0	0	0	0	0	0	0
AC002306.1	0.0083634	-0.0440487	0.0329548	-0.0441238	0.00671669	0.065464	0	0.0230381	0	0	0	0	0.0178975	0.0149658	-0.00587527	-0.136971	-0.137341	-0.136992	0.0474262	-0.036954	-0.036954	-0.036954	0.010416	-0.036954	-0.036954	-0.036954	-0.0367964	-0.0368521
AC002310.1	0.0196058	0.0635312	0.0377534	-0.166691	-0.0338693	-0.20479	-0.149977	-0.19204	-0.260938	-0.139408	-0.139005	-0.241383	-0.25526	-0.247301	-0.369377	-0.293355	-0.197245	-0.466978	-0.158296	-0.387203	-0.372023	0.0407995	-0.17368	-0.204469	-0.328706	-0.467286	-0.414623	-0.329309
AC002310.2	-0.0843057	-0.00760549	-0.128662	-0.165372	-0.135025	-0.0552628	-0.0844963	-0.0111984	-0.0844963	-0.0116345	-0.0372849	-0.0844963	-0.0618244	-0.0618575	-0.0393582	-0.0825221	-0.0752883	0.0494185	-0.0873361	0.168157	0.119862	0.115331	0.0234139	-0.00185471	0.0390558	0.0157104	0.0651525	0.00822875
AC002310.4	0.000274614	0.000103398	8.51838e-05	-0.000189097	0.000333691	0	0	0.37468	0	0	0	0	0	0	0.477512	0.00131502	0.000436946	0.00130948	0.425475	-0.0004874	-0.000160034	0.000576133	-0.000205976	-0.000634527	0.00121814	-0.00068926	-0.0004992	-0.000485173
AC002310.5	0.122426	-0.0728718	-0.0665877	0.0629228	-0.0780924	-0.0129758	0.113695	-0.0229654	0.0483372	-0.0637137	-0.0842418	-0.120722	-0.0427316	-0.0489479	-0.166201	-0.305527	-0.157717	-0.257112	-0.254369	0.0433558	0.0273725	0.165575	0.075648	0.308985	0.127464	-0.0202269	0.116544	0.263571
AC002347.1	0.206458	0.0614086	0.0693777	0.0642632	0.106932	0.185764	0.042153	0.0395881	-0.0535441	0.0308759	0.14278	-0.0535441	0.115661	0.0314113	-0.169619	-0.305972	-0.162949	-0.305972	-0.305972	-0.0405761	0.123371	0.171263	-0.0852297	-0.0852297	0.0800681	-0.0852297	-0.0852297	0.0220284
AC002347.2	0	0	0	0	0	0	0	0	0	0	0	0	0	0	-0.426121	-1.03591	-1.03591	-0.418856	-1.03591	0	0	0	0	0	0	0	0	0
AC002351.1	-0.0429299	0.0511308	0.0321114	-0.0429133	-0.0429149	0	0	0	0	0	0	0	0.064356	0	0.113603	-0.000956707	0.000431566	0.131485	0.00174012	-0.0747958	-0.0779312	-0.035243	-0.0779972	-0.0582792	-0.0777349	-0.0780331	-0.0108906	0.0447478
AC002368.1	0	0	0	0	0	0	0	0	0	0	0	0	0	0	0	0	0	0	0	0	0	0	0	0	0	0	0	0
AC002375.1	-0.0903631	-0.0903631	-0.0403439	-0.0903599	-0.0903631	0	0.5069	0	0	0.0748112	0	0	0.0363836	0.0235221	-0.0888679	-0.237212	-0.00600538	-0.0969838	-0.113815	-0.0960785	-0.0951808	0.00529594	-0.0910377	0.0344846	-0.0969672	-0.0946078	-0.0961472	-0.0459422
AC002378.1	-0.211667	-0.233679	-0.383481	-0.383481	-0.227327	0.17864	0	0	0	0	0.534471	0.830112	9.10021	14.1899	0.280221	0	0.634305	0	0	0	0	0.175158	0	0.370566	0.647101	0	0	0.165999
AC002383.1	0	0	0	0	0	0	0	0	0	0	0	0	0	0	0	0	0	0	0	0	0	0	0	0	0	0	0	0
AC002384.1	0.0677119	0.0686556	0.0323044	0.151832	0.0611739	-0.0678348	-0.0299495	0.0249998	-0.0895859	0.00931006	0.0251625	0.246168	0.084591	0.450124	-0.33735	0.059602	0.141671	-0.12307	-0.0458936	-0.0189986	-0.0457903	0.0228994	0.0360472	0.0359008	0.00879126	0.0334194	-0.0457903	-0.0457903
AC002386.1	0	0	0	0	0	0	0	0	0	0	0	0	0	0	0	0	0	0	0	0	0	0	0	0	0	0	0	0
AC002398.1	0.0216175	0.0203492	-0.0694368	0.0888761	-0.0694368	0	0	0	0.365529	0	0	0.401347	0.059551	0	0.522045	0.0566075	0.203145	0.14452	0.437451	0.130597	-0.0779926	-0.0779926	-0.0779926	-0.0779926	-0.0779926	-0.0779926	-0.0779926	-0.0779926
AC002398.2	-0.177995	-0.260375	-0.410873	0.108888	0.0223463	-0.103788	0.358125	0.266459	0.890819	-0.169815	-0.128254	0.830508	0.137782	0.529386	0.586616	0.893738	0.964554	1.27728	1.30152	0.00662636	0.173897	0.0899454	-0.100917	0.208088	-0.176155	0.123331	-0.347882	-0.413023
AC002401.1	0	0	0	0	0	0.122242	0	0	0	0	0	0	0	0.0318288	0.0320893	-0.13444	0.0372989	-0.13444	0.0165702	0	0	0	0	0	0	0	0	0
AC002401.2	0	0	0	0.0889295	0	0	0.0715288	0.0818902	0	0.0573622	0	0	0	0.0416895	0.318258	0.547151	0.330054	0	0.184328	0	0	0	0	0	0	0	0.103056	0
AC002401.3	0.16824	0	0	0.140547	0	0	0	0.0782892	0	0.0554718	0	0	0.101234	0	0.122649	-0.216793	-0.0412466	-0.0468227	-0.0379521	0	0	0	0	0	0	0.0809882	0	0
AC002401.4	0.6444	0.504476	0.498897	0.409732	0.720251	0.246585	0.468353	0.440259	0.66902	0.480251	0.564147	1.32234	1.58747	0.958757	-0.184054	-0.666875	-0.0386673	0.577857	0.366317	-0.0731408	-0.280463	-0.208847	-0.030712	0.0626723	-0.0317826	-0.158915	-0.475185	-0.335831
AC002428.1	0	0	0	0	0	0	0	0	0	0	0	0	0	0	0	0	0	0	0	0	0	0	0	0	0	0	0	0
AC002428.2	0	0	0	0	0	0	0	0	0	0	0	0	0	0	0	0	0	0	0	0	0	0	0	0	0	0	0	0
AC002429.2	0.012793	-0.00411113	-0.0243086	0.00588419	0.00699447	0.039224	0.0146815	0.0747938	-0.0146949	-0.00274299	-0.0139089	0.0158767	-0.00907337	-0.00679052	-0.0689043	0.0458577	-0.00862026	0.0557354	-0.0222029	-0.00657395	-0.0105425	-0.0167703	-0.0196621	-0.00868665	0.0119915	-0.0204687	-0.0367315	-0.0317151
AC002451.1	0.137729	0.270841	0	0	0	-0.140724	0.958307	-0.140724	-0.0261397	0.00463114	-0.140724	-0.140724	0.0521972	-0.00722966	0.221232	-0.219006	0.172761	0.169502	-0.219047	-0.138546	-0.144997	0.230227	-0.34028	-0.34028	-0.34028	-0.195021	-0.34028	-0.1994
AC002454.1	-0.132182	-0.0896994	-0.429285	-0.152619	-0.334262	-0.253143	-0.0892345	0.0105808	-0.0533481	-0.280259	-0.183914	0.502108	-0.13894	-0.599775	-1.36977	-0.589103	0.359431	-0.412862	1.23066	-0.422112	-0.723358	-0.131138	-0.452228	-0.580373	-0.697086	-0.718629	-1.33794	-0.537878
AC002456.1	0.275837	0.403271	0.324692	-0.043261	0.327121	-0.130426	-0.640055	-0.676366	-0.622367	-0.531315	-0.8058	-0.932724	-0.601361	-0.565084	-0.569236	-1.28472	-1.39606	-0.238269	-1.64061	0.337342	0.0442775	-0.0424088	-0.155145	0.189032	-0.261575	-0.631654	-0.713178	0.33625
AC002463.1	0	0	0	0.017944	0	0	0	0	0	0	0	0	0.16845	0.0322197	0	0.00969817	0	0	0.0822552	0	0	0	0	0	0	0.000450163	0.0589357	0
AC002464.1	-0.0143742	-0.000502691	-9.99433e-05	-0.0143742	-0.000379717	0	0	0	0	0	0	0	0	0.0181873	-0.0610527	-0.0610527	-0.0610527	-0.0610527	-0.0193805	0.0122417	0	0.0192104	0	0	0	0.0178455	0.024104	0
AC002465.1	0	0	0	0	0	0	0	0	0	0	0	0	0	0.0500877	0	0	0	0	0	0	0	0	0	0	0	0	0	0
AC002467.1	-0.0531934	-0.220001	-0.364874	-0.559365	0.127852	0.146096	-0.265995	-0.461152	-0.357073	-0.199403	-0.170339	-0.247987	0.0377407	-0.281191	0.0240948	-0.143186	-0.0362558	-0.688127	-0.146434	-0.260437	-0.359128	-0.533441	-0.644461	-0.76128	-0.988544	-1.10758	-0.895916	-0.777821
AC002470.1	-0.465173	-0.139132	-0.24025	-0.102809	0.0159946	-0.346625	-0.0772333	0.0689514	-0.191718	-0.2338	-0.172399	0.026167	0.360493	-0.00658777	0.8644	0.533099	1.23988	0.923144	0.982252	-0.175317	-0.0693069	0.541978	0.659417	0.510839	0.492985	0.492483	0.916373	1.06548
AC002472.1	0	0	0	0.0485719	0	0	0	0	0	0	0.052045	0	0.033824	0	-0.159429	-0.033559	-0.0186599	-0.071036	-0.269032	0.000120209	0	0	0	0	0	0.0405872	0.0521969	0
AC002480.2	-0.0428487	-0.0254995	-0.0267158	-0.0189883	-0.0524186	0.0345593	0.0596963	0.0169133	0.0452461	0.091932	0.085952	0.162294	0.297695	0.133306	0.09871	0.0101509	0.451121	0.211256	0.56201	0.13481	-0.0291358	-0.0942295	-0.0834427	0.0502464	0.0768304	0.221848	0.693725	0.287453
AC002480.3	-0.053407	-0.053407	-0.053407	-0.053407	-0.053407	-0.0561887	-0.0561887	0.445038	0.0439716	-0.0182927	-0.0561887	0.812552	0.0577014	-0.0024354	0	0	0	0.126714	0.469054	-0.143888	0.00362835	-0.143888	-0.143888	0.0478743	-0.143888	0.142961	0.309553	0.0653221
AC002480.4	-0.00437193	-0.0133023	-0.0133023	-0.00588356	-0.0133023	0	0	0	0.0143807	0.00642067	0	0.289011	0.00650984	0.01097	-0.0254293	-0.0254293	-0.00239396	-0.0254293	-0.0254293	0.00687982	0.0338692	0	0	0	0	0	0.0113372	0
AC002511.1	0	0	0	0	0	0	0	0	0	0	0	0	0	0	0	0	0	0	0	0	0	0	0	0	0	0	0	0
AC002511.2	-0.146648	-0.146648	0.0761122	-0.146648	-0.0733568	-0.0290666	0.452582	-0.00359635	-0.00812305	-0.0237182	0.0627038	0.0488633	-0.0790971	-0.0790971	-0.00439125	-0.00095475	0.19918	-0.333636	0.158493	0.217573	0.160345	0	0.097365	0	0.26722	0.173174	0	0
AC002546.1	0	0	0	0	0	0	0	0	0	0	0	0	0	0	0	0	0.129924	0	0	0	0	0	0	0	0	0	0	0
AC002550.1	0.0179879	-0.0529141	-0.0639915	-0.0458108	-0.0478889	-0.0170093	0.0121028	0.016476	0.0211343	-0.0170093	-0.0170093	0.0283057	-0.0170093	-0.0170093	-0.0449591	-0.0485707	0.000361027	-0.0487903	-0.0498293	-0.053286	-0.114306	-0.0723	0.105369	0.11322	-0.0755777	-0.0130513	-0.090986	-0.0208781
AC002550.2	0.11988	-0.297657	-0.646104	0.338613	0.103642	0.102093	-0.177971	0.0136153	-0.249083	-0.353393	-0.110384	-0.223406	-0.10657	-0.278995	-0.0193566	-0.0426829	-0.0165305	0.442965	-0.573338	-0.288757	0.226001	0.188397	0.0497149	-0.431888	0.0472064	-0.354678	0.137159	-0.128721
AC002553.1	-0.0170147	0.13088	0.313854	0.101441	0.00974611	0.0104101	0.0225108	0.057589	0.0615257	-0.019615	-0.0601834	0.0875064	0.00681683	-0.00172952	-0.0112412	-0.301813	-0.146841	-0.29755	-0.435618	-0.0468572	0.0530892	0.178309	0.0657225	0.0247898	-0.106827	0.0225539	-0.0121293	-0.120404
AC002553.2	-0.323485	-0.0739193	0.271969	-0.186951	-0.312995	0.221537	0.262023	-0.00913088	0.573994	0.546943	0.381144	0.556988	0.491113	0.20037	-0.748475	-1.01979	-1.49999	-1.30752	-0.91033	9.66e-05	-0.427993	-0.478692	0.0894252	0.219395	-0.720845	0.17062	-0.440776	-0.64759
AC002558.2	-0.0336092	-0.0336092	0.0063618	-0.0336092	0.0424963	-0.0793738	0.277295	-0.0793738	-0.0402605	-0.0174969	-0.0793738	-0.0423491	-0.0171569	-0.0509767	-0.300904	-0.393972	0.203052	-0.392752	-0.19436	0	0.0933144	0	0	0	0	0.184616	0	0
AC002563.1	0	0	0	0	0	0	0	0	0	0	0	0	0	0	-0.184515	-0.184515	-0.184515	-0.184515	-0.184515	0	0	0	0	0	0	0	0	0
AC002985.1	0.0839129	0.0262925	0.02254	0.000746938	-0.111921	-0.0662303	-0.0418153	0.074037	-0.0720968	-0.00594978	0.00615951	0.199222	0.0289783	0.15134	0.0352229	0.279796	0.0987112	0.126815	-0.0548279	-0.64778	-0.165973	-0.595579	-0.574987	-0.571773	-0.458871	-0.443118	-0.301269	-0.47788
AC002996.1	0.336693	-0.00507413	0.0933239	0.637291	-0.0802498	-0.129536	0.193903	0.372138	0.190916	-0.335291	-0.0285665	0.0979444	0.687575	0.45525	-0.821227	0.197734	0.594424	0.156419	0.02053	-0.462113	-0.122648	-0.412839	-0.748089	-0.605316	0.496713	-0.44168	-0.589543	0.0451954
AC003001.1	0	0	0	0	0	0	0	0	0	0	0	0	0	0	0	0	0	0	0	0	0	0	0	0	0	0	0	0
AC003002.1	-0.000594175	-0.00035109	0.000276381	-0.000368769	0.000406703	0	0	0	0	0	0	0	0	0	0.0072299	0.00820708	0.00471684	0.47555	0.00451494	0.000478542	0.00472496	-0.000166278	-0.00206139	-0.00070283	-0.000367097	-0.00359417	0.00314676	0.314554
AC003002.2	-0.102544	-0.104681	0.16289	0.140972	-0.10564	0	0.793937	0.836346	0.637442	0.0852168	0	1.18544	0.0375716	0.0589337	0.00850305	-0.332798	-0.0567121	-0.440331	-0.488412	-0.362763	0.254017	-0.3576	-0.269831	0.135397	-0.361055	-0.239375	-0.171733	-0.200787
AC003002.3	0.0719227	0.200387	-0.155729	-0.215393	-0.245485	-0.0408343	-0.00571921	-0.0225788	0.34095	0.281412	0.350458	0.0370652	0.20231	0.25911	0.207907	-0.444408	-0.983016	-0.763135	-0.157961	0.202314	-0.0579258	0.329133	0.0740387	0.131147	0.806845	-0.0121454	0.338922	0.40343
AC003005.1	0.18354	0.0443182	0.0331725	-0.113553	0.112906	-0.0469949	-0.000758237	0.00434463	0.135052	-0.0469949	0.0576435	0.0585766	1.96035	1.9889	-0.184118	-0.179924	-0.038017	-0.0313512	0.0291203	0.089146	0.000548568	0.099922	0.284112	0.310339	0.353359	0.119591	0.164569	-0.000805446
AC003005.2	-0.151426	0.15446	-0.034291	-0.0958611	-0.038518	-0.820368	0.176202	-0.857869	0.18678	-0.773826	-0.857869	0.0369067	-0.776287	-0.757386	0.539344	0	0.301556	0.273424	0.512362	0.168919	0.270064	0.0696985	-0.0757166	0.110737	-0.0255177	-0.141329	0.316905	-0.0113128
AC003006.1	0.373102	-0.00461572	0.427729	-0.000885062	0.110663	0.213963	0.124935	-0.0838279	-0.0838279	-0.0838279	0.228703	0.114304	-0.0838279	-0.0838279	0.0601582	-0.0659208	0.189621	-0.177316	0.601754	0.143004	-0.0790766	-0.0725055	-0.091493	0.020003	-0.0352132	-0.104138	0.521268	-0.0978405
AC003009.1	0	0	0	0	0	0	0	0	0	0	0	0	0	0	0	0	0	0	0	0	0	0	0	0	0	0	0	0
AC003035.1	-4.71277e-06	-1.34651e-05	-7.6943e-07	-6.05928e-06	-1.34651e-05	0	0	0	0	0.0425508	0	0	0	0.0257254	-0.276868	-0.286511	0.0711004	-0.286477	-0.286538	-7.42e-05	-7.28e-05	-4.43e-05	0.000132685	-1.3e-05	-2.79e-05	0.000527586	0.000541423	1.86e-05
AC003035.2	0	0	0	0	0	0	0	0	0	0	0	0	0	0	0	0	0	0	0	0	0	0	0	0	0	0	0	0
AC003043.1	0	0	0	0	0	0	0	0.123217	0	0	0	0	0	0	0	0	0	0	0	0	0	0	0	0	0	0	0	0
AC003043.2	-0.000565459	0.0219232	0.0161757	0.0160962	0.000850421	-0.0137399	-0.00943173	-0.0179907	-0.00811324	-0.010595	-0.00835526	-0.0160504	0.0244268	-0.0154955	-0.0311034	0.0219248	0.0131879	-0.0945974	0.0338396	-0.0332161	-0.0371004	-0.018629	-0.0111601	0.0095895	-0.0169575	-0.0122566	-0.00365612	-0.00767667
AC003070.1	-0.0618941	-0.0618941	-0.0618941	-0.0618941	-0.0618941	0	0	0	0	0	0	0	0	0	0	0.15535	0	0.161516	0.17019	0	0	0.14125	0.0790949	0	0	0	0	0
AC003070.2	0	0	0	0	0.0919485	-0.102694	-0.102694	-0.102694	-0.102694	0.0307649	0.0497439	0.132124	0.0204141	0.136064	0.011775	-0.180054	-0.180054	0.020544	-0.180054	-0.0930494	-0.0930494	-0.0930494	-0.0930494	-0.0930494	-0.0930494	-0.0930494	-0.0930494	0.105203
AC003084.1	0	0	0	0	0	0	0	0	0	0	0	0	0	0.0354605	0	0	0	0	0	0	0	0	0	0	0	0	0	0
AC003087.1	0	0	0	0	0	0	0	0	0	0	0	0	0	0	0	0	0	0	0	0	0	0	0	0	0	0	0	0
AC003092.1	0.134914	-0.512821	-0.631078	-0.842563	-0.471694	-0.124157	-0.079803	0.0255789	-0.299284	-1.00349	-0.962865	-0.807102	-0.931914	-1.06548	-0.877908	-1.05394	-0.866963	-0.482614	-0.574379	-0.195911	-0.562885	-0.296889	-0.561822	-0.257177	-0.638954	-0.232561	0.512805	0.365733
AC003092.2	0	0.0834249	0	0	0	0	0	0.0771897	0	0.0543975	0	0.0692234	0.0467923	0.0736552	0	0	0	0	0	0	0	0	0	0	0	0.175628	0	0.178405
AC003098.1	0.116813	0	0	0	0	0.0429921	0.059134	0.692232	0	0.0446508	0	0.669551	0.0937451	0.0723247	0.141469	0	0	0	0	-0.0883094	-0.0883094	-0.0883094	-0.0883094	-0.0883094	0.0138371	-0.0883094	-0.0883094	-0.0883094
AC003101.1	0.0672128	0	0	0.140242	0	0.169901	0.36689	0.242893	0.0573028	0	0.137422	0.304486	0.0985414	0	-0.0104043	-0.036919	-0.179776	-0.179776	-0.179776	-0.0774911	0.0773735	-0.134712	0.0113526	0.100324	-0.134712	0.159722	-0.0417551	0.0893724
AC003101.2	0.190679	-0.18239	-0.294543	-0.543184	0.111879	0.0841563	-0.206209	-0.256055	-0.244317	-0.547526	-0.423933	-0.366738	-0.951064	-0.805556	-0.0748716	-0.236073	-0.278595	-0.0614093	0.081903	0.411634	0.0797451	-0.136424	-0.1411	0.535695	-0.27677	0.385371	-0.0166887	0.132268
AC003102.1	0.0741973	-0.000857817	-0.0510792	0.181186	-0.0864296	-0.0135523	0.0886748	0.00686651	0.0217986	0.146233	0.166492	0.145506	0.0660038	0.121625	-0.107992	-0.292901	-0.17636	-0.130997	0.25394	0.0375747	0.206384	-0.00794047	0.251546	0.0797647	0.341041	0.17843	0.151184	-0.0585398
AC003666.1	0	0	0	0	0	0	0	0	0	0	0	0	0	0	-0.120286	-0.120286	-0.117778	-0.00934748	-0.120286	0	0	0	0	0	0	0.0948633	0.0614081	0.103403
AC003681.1	0.00124163	-0.0103078	-0.0118878	-0.00588934	-0.00632211	-0.00451388	0.00129426	-0.00229871	-0.00168612	0.000579269	0.000378771	0.00379119	-0.00207435	-0.000307091	-0.02768	-0.067602	0.00255709	-0.0482917	0.00553167	0.00172122	0.00905815	0.00445317	0.0176194	0.00453062	0.0182442	0.00473647	0.0185934	0.000221031
AC003682.1	-0.0607783	-0.0607783	-0.0607783	-0.0607783	-0.0607783	0	0.582847	0.212122	0	0.0517177	0.354232	0.402738	0	0	0.167895	0	0.642787	0.434832	0	-0.161961	0.109064	0.0640128	0.0503063	0.00964856	-0.161961	0.004247	0.123044	-0.0751643
AC003684.1	0	0	0	0	0.0126491	0	0.0115013	0	0	0	0	0	0	0	0.0355855	0	0.0356568	0	0.0368747	0	0	0	0.0239467	0.0149953	0.00071952	0	0	0.0297854
AC003685.1	0	0	0	0	0	0	0	0	0	0	0	0	0	0	0	0	0	0	0	0	0	0	0	0	0	0	0	0
AC003688.1	-0.219757	-0.221225	-0.0534931	-0.219264	-0.221007	0	0	0	0	0.31103	0.231317	0	0.167652	0.0345653	-0.00215504	0.340797	0.00100667	0.00898566	-0.00184736	-0.287415	-0.286167	-0.0711505	-0.285442	-0.191726	-0.285176	-0.0513268	-0.28503	-0.289929
AC003688.2	0	0	0	0	0	0	0	0	0	0	0	0	0	0	0	0	0	0	0	0	0	0	0	0	0	0	0	0
AC003956.1	0.124753	0	0	0.103823	0	0	0.101069	0	0.103723	0	0	0	0.0658885	0.104374	-0.0606233	0.182515	-0.0518376	0.303724	0.308409	0	0	0.204741	0	0	0	0	0.161639	0.124329
AC003958.2	0.00194672	-0.00948768	0.00657013	-0.00232753	-0.00948768	0.0591498	0.120043	0.0376917	0.107195	0	0.0934295	0.0828285	6.5338	0	0.0344959	0.0127866	0.0372846	0.0437742	0.019266	-0.00267357	0.00169495	-0.00453335	-0.00572053	0.00126242	0.00833762	-0.0157331	-0.00299601	-0.0101624
AC003965.1	0.013404	-0.100274	-0.0204142	0.0511583	-0.0603792	0.0390817	-0.182492	-0.258363	-0.124115	-0.104905	-0.0978763	-0.0469553	0.00569092	-0.0468147	-0.11372	-0.206862	-0.206862	0.0932368	0.133367	-0.292182	-0.183421	-0.459416	-0.357665	-0.189453	-0.459416	-0.415225	-0.148875	-0.179011
AC003965.2	0	0	0	0	0	-0.186658	-0.186658	-0.186658	-0.186658	-0.186658	-0.186658	-0.186658	-0.186658	-0.186658	0.362261	0	0	0	0	-0.287943	-0.287943	-0.287943	-0.287943	-0.287943	-0.287943	-0.287943	-0.287943	-0.287943
AC003973.1	0	0.0528874	0	0	0	0	0	0	0	0	0	0	0	0	0	0	0	0	0	0	0	0	0	0	0	0.0583089	0.0718295	0
AC003973.2	-0.0133466	-0.0133466	-0.0133466	0.0041727	-0.0133466	0	0	0	0.0157796	0	0	0.014754	0	0	0	0.0977109	0	0	0	0	0	0	0	0.0185916	0	0	0	0
AC003975.1	0.0643712	0.00144864	0.0892378	0.0311498	0.0123412	0.0753533	0.0553196	0.0265921	0	0.117006	0.0302328	0.14889	0.0819519	0.0813979	-0.217956	0.0852989	-0.0481525	-0.160113	-0.0131318	-0.041653	-0.0853981	-0.084126	0.0105877	-0.0406823	-0.0336873	-0.0441811	0.00707059	-0.0231569
AC003982.1	0	0	0	0	0	0	0	0	0	0	0	0	0	0	0	0	0	0	0	0	0	0	0	0	0	0	0	0
AC003984.1	0	0	0	0	0	0	0.00447934	0	0	0	0	0.00452371	0.00431993	0.972461	0	0	0.0143063	0.0143771	0.0132216	0	0	0	0	0	0	0	0	0
AC003985.1	0	0	0	0	0	0	0	0	0	0	0	0	0	0	0	0	0	0	0	0	0	0	0	0	0	0	0	0
AC003985.2	0	0	0	0	0	0	0	0	0.0104911	0	0	0	0	0	0.0325929	0	0	0	0	0	0	0	0	0	0	0	0	0
AC003986.1	-0.0476512	-0.0476512	-0.0476512	-0.0338022	-0.0331978	-0.0161863	-0.0433876	-0.0433876	-0.029162	-0.0433876	-0.0433876	-0.0433876	-0.0433876	-0.0433876	0	0	0	0	0	0	0.0599615	0.03221	0	0	0	0	0	0
AC003986.2	-0.00671114	-0.0318502	-0.0318502	-0.018008	-0.0318502	-0.212188	-0.0714036	-0.212188	-0.212188	-0.202163	-0.212188	-0.212188	-0.192957	-0.202602	-0.306796	-0.438126	-0.513036	-0.450266	-0.359691	0.0292631	0.00871611	0.0735959	0.0311261	0.00236195	-0.0124103	-0.0124103	-0.0124103	-0.0124103
AC003986.3	-0.185967	-0.218242	-0.184433	-0.25497	-0.294443	-0.342956	-0.137917	-0.115019	-0.244057	-0.213246	-0.304132	-0.178584	-0.182085	-0.185053	-0.525493	-0.329139	-0.489412	-0.690322	-0.346334	-0.0574749	0.163343	0.32604	-0.237349	-0.100354	0.184275	0.225188	0.0218945	-0.0250447
AC003988.1	0	0	0	0	0	0	0	0	0	0	0	0	0.0692932	0.0511289	0	0.115151	0	0	0.114576	0	0	0	0	0	0	0	0	0.0514055
AC003991.1	0.114348	0.114795	0.130497	0.175699	0.0712842	0.189474	0.286568	0.152219	-0.0277574	0.138862	0.0975927	0.0345197	0.323935	0.106179	-0.491913	-0.232295	-0.231729	-0.735503	-0.163523	-0.200423	-0.259513	-0.214531	-0.369076	-0.265522	-0.194733	-0.052397	-0.18311	-0.415081
AC003991.2	0	0	0.0535604	0.202721	0	0	0	0	0	0	0	0	0	0.0347682	-0.218771	-0.428867	-0.296689	-0.309398	-0.428867	0.0643131	-0.048352	-0.048352	0.00784619	0.0159757	-0.048352	-0.048352	-0.048352	0.00331052
AC004009.1	0	0	0	0	0	0	0	0	0	0	0	0	0	0	0	0	0	0	0	0	0	0	0	0	0	0	0	0
AC004012.1	0	0	0	0	0	0	0	0	0	0	0	0	0	0	0	0	0	0	0	0	0	0	0	0	0	0	0	0
AC004014.1	0	0	0	0	0	0	0	0	0	0	0	0	0	0.0587043	0	0	0.143182	0	0	0	0	0	0	0	0	0	0	0
AC004023.1	0.0191032	0.0288996	0.0062199	0.00734969	0.0169391	-0.029217	-0.073153	-0.0319187	0.00395933	0.0136529	-0.000638405	-0.0359938	0.011205	-0.0402492	0.0893961	-0.0179146	-0.0197936	-0.0288553	-0.119876	0.0190342	-0.00522854	0.010305	0.0258288	0.0302647	-0.0644046	0.000984494	0.018339	-0.0416299
AC004034.1	-0.00467456	-0.0613029	-0.0613029	-0.0613029	-0.0613029	0	0	0	0	0	0	0	0	0	-0.00706501	-0.0195177	-0.154316	-0.0161537	-0.0194334	0	0	0	0	0	0	0	0	0
AC004039.1	0.0770211	0.159503	0.0903719	0.0698396	-0.0288616	0.00956483	0.144031	0.18318	-0.00406213	0.0656019	0.10359	-0.0681603	0.102801	0.0890597	0.0627673	0.38674	0.765802	0.973126	0.265805	-0.0257693	0.145618	0.209403	0.108513	0.420556	0.17103	0.199124	0.327326	0.0581114
AC004052.1	0	0	0	0	0	0	0	0	0	0	0	0	0	0	0	0	0.13838	0	0	0	0	0	0	0	0	0	0	0
AC004053.1	0	0	0	0	0	0	0	0	0	0	0	0	0	0	0	0	0	0	0	0	0	0	0	0	0	0	0	0
AC004054.1	0	0	0	0	0	0	0	0	0	0	0	0	0	0	0	0	0	0	0	0	0	0	0	0	0	0	0	0
AC004063.1	0	0	0	0	0.0535613	0.067487	0.0506471	0.202924	0	0	0	0	0.0394389	0	0.0859993	0	0.132268	0	0.122982	-0.0757206	-0.0757206	-0.0757206	-0.0757206	-0.0757206	0.181175	0.00142113	-0.0757206	-0.0756347
AC004066.2	0	0	0	0	0	0	0	0	0	0	0	0	0	0	0	0	0	0	0	0	0	0	0	0	0	0	0	0
AC004067.1	-0.000142051	-0.14132	0.163105	-0.052487	-0.117846	0.165236	0.00618666	0.130977	-0.053294	0.00475574	0.0529808	-0.203348	-0.217515	-0.166194	-0.448054	-0.435437	-0.197538	-0.638587	-0.0515478	-0.202965	-0.238082	-0.293818	-0.245769	-0.0968415	-0.250486	-0.26496	-0.396216	-0.309321
AC004069.1	0.085194	-0.217108	-0.271461	-0.0792708	-0.126802	0.123265	-0.230906	-0.119646	-0.358753	-0.168636	-0.30107	-0.194845	-0.211076	-0.18355	-0.0403899	0.222049	0.326866	0.426212	0.34196	-0.175789	0.24804	0.0263466	-0.00175617	0.170322	-0.256561	0.0388287	0.0505945	0.0429717
AC004076.1	-0.0225541	0.0378263	0.0198147	-0.0249343	-0.0279235	-0.333864	-0.0823473	-0.130923	-0.089038	-0.184288	-0.130471	0.0605877	-0.00118807	0.0448527	0.00631206	-0.237069	0.299647	0.424207	0.424776	0.0198098	-0.0761256	-0.00959485	0.00328868	-0.130341	0.295671	0.0182664	-0.143971	-0.097717
AC004076.2	0.044034	-0.0474157	0.0299598	-0.0547653	-0.0419988	0.0328646	-0.00516852	0.00408343	0.00155225	0.0285445	0.0315865	0.0267039	0.0274259	0.0163762	-0.0616434	0.0418714	-0.04728	-0.02156	-0.0232989	0.0348609	0.020873	0.0464431	-0.0059915	-0.0679222	-0.100331	-0.0136701	-0.0205656	-0.0430506
AC004080.1	0	0	0	0	0	0	0	0	0	0	0	0	0	0	0	0	0	0	0	0	0	0	0	0	0	0	0	0
AC004080.2	0	0	0	0	0	0	0	0	0	0	0	0	0	0	0	0	0	0	0	0	0	0	0	0	0	0	0	0
AC004080.3	0.00255209	0	0	0	0	0	0	0	0	0	0	0	0	0	0.0268094	-0.0092336	-0.0092336	0.00275044	-0.0092336	-0.00808492	-0.0065838	-0.00681787	-0.000405074	-0.0118141	-0.00447067	-0.0103054	0.00146788	-0.0123964
AC004112.1	0	0	0.0522629	0.0578509	0	0	0	0	0	0	0.0523184	0	0.0339855	0	-0.624358	-0.180482	-0.212886	-0.740268	0.170317	0	0.0786153	0	0	0	0	0	0	0.053674
AC004130.1	-0.295469	-0.374005	0.152051	0.0352145	-0.342868	-0.118775	-0.395696	-0.274097	-0.355211	-0.28232	-0.264694	-0.598132	-0.82819	-0.914827	-0.377842	-0.386834	-0.298501	-0.679485	-0.338233	0.0867359	0.228632	0.276594	0.485775	0.513262	0.425139	0.433049	0.609145	0.494031
AC004147.2	0	0	0	0	0	0	0	0	0	0	0	0	0	0	0.0138628	0	0	0	0	0	0	0	0	0	0	0	0	0
AC004147.3	0	0	0	0	0	0	0	0	0	0	0	0	0	0	0	0	0	0	0	0	0	0	0	0	0	0	0	0
AC004148.1	0	0	0	0.101584	0	0	0	0.0930253	0	0	0.0895574	0.47562	0	0	0	0	0	0	0	0	0	0	0.180762	0	0	0	0	0
AC004148.2	-0.015667	0.0449055	-0.119852	-0.133339	-0.0827945	-0.22526	-0.238914	-0.143922	-0.225097	-0.49057	-0.52814	-0.533883	-0.773863	-0.687576	0.150122	-0.458826	-0.379987	-0.630472	-0.268448	0.0653667	0.215789	0.0657052	0.0857062	0.026709	-0.093422	-0.231405	-0.348195	-0.210293
AC004149.1	0.150368	0.0527751	-0.0012256	0.106036	0.048783	-0.112364	-0.049638	-0.0374957	-0.0135402	-0.148824	-0.148824	-0.148824	-0.113837	-0.111743	-0.236798	0.0478015	-0.212736	0.438638	-0.11739	-0.236489	-0.158713	-0.280241	-0.0896193	-0.119292	-0.167307	-0.222391	-0.273775	-0.216958
AC004156.1	0.0472858	-0.0144875	0.00804797	0.0676354	-0.01398	0.0144167	0.0444256	0.0225289	0.0661391	0.0849075	0.0790794	0.0800241	0.110634	0.26159	0.144132	0.0857165	0.283642	0.291475	0.17431	0.05637	0.064004	0.0112936	0.064892	0.123433	0.0276458	0.0661459	0.160193	0.0932635
AC004158.1	-0.00492755	-0.00492755	-0.00026441	-0.00492755	-0.00492755	0	0	0	0	0.010466	0	0	0	0	-0.0351999	0.0198146	0.047254	-0.0443937	0.00216023	0.0111977	0.0440709	0.0194161	1.67e-05	0.00523805	-0.000253541	-0.000192689	0.0248534	-0.000253541
AC004160.2	0	0	0	0	0	0	0	0	0	0	0	0	0	0	-0.103516	0.154282	0.0324929	-0.103516	-0.103516	0	0	0	0	0.066388	0	0	0.0812238	0
AC004217.1	0	0	0	0	0	0	0	0	0	0	0	0	0	0	0	0	0	0	0.0833834	0	0	0	0	0	0	0	0	0
AC004221.1	-0.0210636	-0.158835	-0.111461	-0.00849276	-0.0935844	0.0722089	0.0811217	-0.0130783	0.0745546	0.0905411	0.0747997	-0.0826418	0.252896	0.18033	0.0955145	0.405522	0.272323	0.124124	0.467805	0.183058	0.261391	0.127886	0.123578	0.115488	0.337437	0.10803	0.186323	0.374999
AC004223.2	0.112044	0.00969376	0.00874081	-0.0460438	0.00797576	0.596285	0.0498048	0	0.05305	0.0816692	0.0582536	0	0	0.0555161	-0.251819	-0.387204	-0.387204	-0.387204	-0.387204	-0.0845378	-0.00251208	-0.0845378	-0.0235976	-0.0845378	0.00448734	0.102475	-0.0845378	-0.0845378
AC004223.3	0.0226251	-0.0462627	0.187089	-0.100729	0.0108985	-0.142281	0.105113	-0.126419	-0.103791	-0.0117646	0.106482	-0.0698436	-0.221907	-0.115064	-0.0845033	0.197856	0.0735616	-0.237382	-0.413592	-0.00260734	-0.229035	-0.115497	-0.250498	-0.304259	0.0123413	-0.253336	0.224565	-0.406079
AC004223.4	0.0206895	-0.107014	0.146172	0.0333635	0.0175199	0	0.111866	0	0.316519	0.081083	0	0	0.0823301	0.132551	-0.0949538	-0.336241	-0.0627241	-0.336241	0.570587	-0.39698	-0.39698	-0.39698	-0.0752877	-0.135009	-0.39698	-0.130427	-0.39698	-0.39698
AC004231.1	0.0851669	0.0743967	-0.0461776	0.205736	0.27149	0.16498	0.105925	0.221266	0.411749	0.0685589	0.10785	0.486264	0.894021	0.641854	0.215181	0.304321	0.00299037	0.428874	0.410808	0.0689836	0.0176904	-0.0580212	0.245184	-0.0697084	-0.0686221	0.078116	0.264641	0.19181
AC004231.3	0	0	0	0	0.525528	-0.196625	-0.196625	-0.196625	-0.0188348	-0.07283	-0.196625	-0.0199101	-0.196625	-0.0153516	0	0.338998	0	0	0.541733	0	0	0	0	0	0	0.194626	0	0.211198
AC004232.2	-0.0590842	-0.0644651	-0.120405	-0.0553529	0.0156877	0.0514987	0.31982	0.164138	0.160958	0.0811959	-0.0341812	0.218042	0.0286997	0.0353634	-0.517443	-0.509351	-0.326248	-0.501376	-0.443287	0.0624767	-0.0724685	-0.00690808	-0.0296999	0.0458759	0.114085	-0.0386845	0.246595	0.0393094
AC004233.2	0	0	0	0	0	-0.00621175	-0.0193275	-0.0193275	-0.0193275	-0.0103857	-0.0102659	-0.00985443	-0.0193275	-0.00532371	0.025974	0	0.0607716	0	0	-0.0753653	-0.074688	-0.0687039	-0.0449301	-0.0919335	-0.0368476	-0.0919335	-0.0384444	-0.0919335
AC004233.3	0.0261173	0.0594041	0.0730216	0.0384799	0.051668	0.034677	-0.0173255	-0.0151295	-0.0336135	-0.0183898	0.0154997	0.00303331	-0.019456	-0.00972461	-0.132448	-0.132448	-0.0319987	-0.132448	0.0142093	-0.0127077	-0.041128	0.00417427	-0.0450985	0.0429364	-0.0394669	-0.0284982	0.0435977	-0.0045854
AC004233.4	0.168986	0.0934863	0	0.0847664	0.0802169	0.0369519	-0.0881767	-0.16571	-0.16571	-0.16571	-0.16571	-0.0883764	-0.11405	0.175623	0.17237	0.36327	0.188606	0.180507	0.812083	0	0	0.263909	0	0.109614	0.168071	0.251427	0	0
AC004241.1	0.118702	0.0057358	0.128139	0.0262629	-0.29168	-0.279666	-0.275043	-0.399366	-0.0157251	-0.432861	-0.440471	0.0690755	-0.313621	-0.828945	-0.215521	-0.556622	-0.299051	0.152985	0.0228226	-0.343419	-0.141594	-0.343234	-0.205675	-0.423311	-0.604965	-0.306823	0.123107	-0.435046
AC004241.2	0.028175	0.347865	0.222325	0.0794062	0.264107	-0.275667	0.0148123	0.365837	-0.342741	-0.207792	-0.15259	0.177373	0.119622	0.0080992	-0.100188	-0.128139	0.265091	0.0147923	0.788016	0.311315	0.0399509	0.279517	0.318172	-0.0729052	-0.0729052	0.253322	0.31	0.382435
AC004253.1	-0.0555477	-0.0555477	-0.0555452	-0.0555477	-0.0555477	0	0	0.0669173	0	0	0	0	0	0.0346661	-0.287793	-0.313579	-0.413224	0.306179	-0.28887	0	0.142817	0	0.188832	0.08145	0	1.61e-05	0	0
AC004253.2	0	0	0	0	0	0	0	0	0	0	0	0	0	0	0	0	0	0.195175	0	0	0	0	0	0	0	0	0	0
AC004257.1	-2.1097e-07	-2.04141e-07	-2.29869e-07	0.195769	-2.29869e-07	0	0.272646	0	0	0	0	0.156277	0	0	-0.452374	-0.452385	-0.452385	0.054095	-0.452381	0.187498	0.230062	0.29885	-3.02e-08	0.340271	-3.02e-08	-3.02e-08	-3.02e-08	-3.02e-08
AC004263.1	0	0.0402349	0	0	0	0	0	0	0	0	0	0	0	0	-0.112404	-0.00492908	-0.0908566	-0.20969	-0.0140855	-0.0383674	-0.0383674	-0.0383674	-0.0383674	0.00632542	-0.0383674	0.00907412	-0.0383674	-0.0383674
AC004264.1	-0.0492039	-0.0667665	-0.143892	0.166796	-0.08495	-0.123848	0.116726	-0.0752264	-0.0253593	0.283131	0.311695	0.368537	1.30978	0.932856	0.86817	0.799856	1.23451	0.792417	1.66703	-0.235712	-0.113842	0.508697	0.289692	0.931442	0.787376	0.971615	0.90013	1.36738
AC004381.1	0	0	0	0	0	0	0.0998847	0	0	0	0	0.125177	0	0	0	0	0	0	0	0	0	0.134182	0	0	0	0	0	0
AC004408.1	0	0	0	0	0	0	0	0	0	0	0	0	0	0	0	0.00256241	0.00376788	0	0	0	0	0	0	0	0	0	0	0
AC004415.1	0	0	0	0	0	0	0	0	0	0	0	0	0	0	0	0	0	0	0	0	0	0	0	0	0	0	0	0
AC004448.1	0	0	0	0	0	0	0	0	0	0	0	0	0	0	0	0	0	0	0	0	0	0	0	0	0	0	0	0
AC004448.2	0.0262042	-0.0349416	-0.0177077	-0.0462063	-0.0758463	-0.0523279	-0.0659968	-0.147109	-0.0904193	-0.061417	0.00355535	-0.119406	0.254697	0.0654644	-0.426655	-0.317262	0.297783	-0.485066	-0.420633	0.00704695	0.0625768	0.0800854	0.133988	0.169246	0.117629	0.196623	0.206028	0.0115231
AC004448.3	0	0	0	0	0	0	0	0.0455059	0	0	0	0	0	0	0.00250899	0.00253159	0.155305	0.00324544	0	0	0	0	0	0	0	0	0	0
AC004449.1	0.124416	0.240425	0.125971	0.0512617	0.0983041	-0.077157	-0.00642523	0.142418	0.0671675	-0.023258	0.000927604	-0.077157	0.0264782	-0.000190565	-0.902474	-0.421373	-0.446637	0.184783	-0.329891	0.159823	-0.00354758	-0.120835	-0.0174174	-0.0231179	-0.120835	0.139591	-0.120835	0.0559755
AC004466.1	0.179571	-0.0449628	0.0345434	0.071078	0.0652537	0.0234123	-0.064856	-0.05277	-0.0831501	0.0561838	0.0384287	0.110989	0.117119	0.0686703	-0.0485062	-0.0191646	0.325992	0.162627	0.237288	0.0765219	0	0.214103	0.108901	0.163295	0.183867	0.244539	0.234594	0.151985
AC004466.3	0	0.0528874	0	0	0.0537133	0	0	0	0.102995	0	0	0.0502806	0	0.0296415	0.03249	-0.232274	-0.0649445	-0.114797	-0.346811	-0.0523602	-0.0523602	-0.0523602	0.041377	-0.0523602	-0.0523602	-0.0523602	-0.0523602	-0.0523602
AC004470.1	0	0	0	0	0	0	0	0	0	0	0	0	0	0	0	0	0	0	0	0	0	0	0	0	0	0	0	0
AC004471.1	0	0	0	0	0.046654	0.033389	0.0450129	0.0508121	0.0480335	0	0	0.0456762	0.032362	0.174706	0.0659019	0.00113969	-0.222263	0.0300631	-0.361506	0.00444847	-0.0692049	0.0596004	0.0167747	-0.0692049	-0.0692049	-0.0692049	0.00840024	-0.0692049
AC004471.2	-0.0272193	-0.0122158	0.0290447	-0.0277707	-0.0136563	0.0363059	0.0230914	-0.0136026	-0.0289042	-0.0174389	-0.00362314	0.00342113	-0.00607333	-0.0202576	0.0634276	-0.0125632	0.189906	0.0870401	-0.00660088	-0.00864215	-0.0210293	-0.0210293	0.0170077	-4.66e-05	-0.0210293	-0.0203785	-0.000651352	-0.0210293
AC004477.2	0	0	0	0	0	0	0	0	0	0	0	0	0	0	0	0	0	0	0	0	0	0	0	0	0	0	0	0
AC004477.3	-0.178339	-0.128313	0.232088	-0.313964	-0.139616	-0.213544	-0.169112	-0.192351	-0.160269	-0.15949	-0.0351291	-0.115941	-0.136872	0.041313	0.0388449	0.121178	0.0129768	0.111474	0.347818	0.0964741	-0.00436865	-0.0375784	-0.143384	-0.0263193	-0.160928	-0.153933	-0.18725	-0.0425686
AC004485.1	0	0	0.0575529	0	0.0543854	0	0	0	0	0	0	0	0	0	0	0	0	0	0	0	0	0	0	0	0	0	0	0
AC004490.1	0.0233128	0	0.014879	0	0.00754869	0	0.00688392	0.00782696	0	0	0	0.00853219	0	0.00456111	-0.102187	-0.0844295	-0.102226	-0.148072	-0.095	0.000697955	0	0	0.00550985	0	0.0134849	0	0.000132181	0
AC004492.1	0.0438531	0.544646	0.286399	0.0044913	-0.0297746	-0.182688	-0.00333774	-0.186593	-0.212742	0.00243808	-0.0217425	0.0648685	-0.150633	-0.064701	-0.200654	-0.469364	-0.493309	-0.106303	0.0299969	0.210822	0.198639	0.442955	0.211823	0.251276	0.35451	0.436463	0.330966	0.214166
AC004494.1	-0.0524278	-0.0517743	0.0139356	-0.0675184	-0.0459245	-0.0140083	-0.000127081	0.083608	0.0147934	0.0273687	0.0575526	0.00125611	0.0263751	0.0465	-0.0640654	-0.0971483	-0.0824997	-0.0884852	-0.117718	-0.0103567	0.0249197	-0.0521422	0.0478821	0.00555504	-0.014495	-0.0246116	-0.0401315	0.0184327
AC004520.1	0.0247638	0.228678	0.0506728	-0.0899598	-0.0272455	0.391459	0.202046	0.158175	0.034855	0.230966	0.230281	0.149137	0.519579	0.255362	0.191509	0.200552	0.591221	-0.203302	0.109761	0.175152	0.278766	0.292469	0.208257	0.0757084	0.34829	0.0726543	-0.0966685	-0.161684
AC004522.2	0	0	0	0	0	-0.037442	-0.037442	-0.00235527	0.00111881	-0.037442	-0.00293559	-0.037442	1.51289	0.0038788	0	0	0	0.0972417	0.230149	0.059961	0	0	0	0	0.0852277	0	0	0.0410091
AC004528.1	-0.0306221	-0.0337563	-0.0788168	0.0145414	-0.0786881	0	0.0391245	0	0.0763257	0	0	0.059969	0	0.0302248	-0.0913269	-0.244815	-0.245092	-0.115726	-0.245092	-0.041474	-0.041474	0.0188239	-0.041474	0.017327	-0.041474	0.00551364	-0.041474	-0.041474
AC004528.2	-0.0659702	-0.0659702	-0.0659702	0.0845379	0.00715215	0	0.0710467	0	0	0.109855	0	0	0.0570095	0	-1.78e-05	3.17e-05	4.04e-05	0.000830674	0.000149347	0	0	0	0	0	0	0	0	0
AC004540.1	0	0	0.0359425	0	0	0.0363628	0.0246477	0.0242651	0.0722815	-0.0341171	-0.0341171	-0.0341171	0.0354323	0.0251376	0	0	0	0	0.0862252	0	0	0	0	0.0472833	0	0.0654253	0	0.06457
AC004540.2	0	0	0	0	0	0	0	0	0	0	0	0	0	0	0	0	0	0	0	0	0	0	0	0	0.125748	0	0	0
AC004542.1	-0.33017	-0.52397	-0.52397	0.0286254	-0.52397	-0.370372	-0.204285	-0.0224151	-0.0491947	-0.370372	-0.212982	-0.200555	-0.370372	-0.370372	0.0807106	-0.010802	0.213801	0.273351	0.362509	-0.598701	-0.0777002	-0.101119	-0.269317	-0.744056	-0.305236	-0.211713	-0.519027	-0.744056
AC004542.2	0.0462376	-0.1646	-0.16301	0.0262619	-0.217487	0.0305972	0.0399533	0.0487866	-0.0200762	-0.0613507	-0.0563805	0.215654	-0.103692	-0.103692	0.00163159	0.0436379	0.115405	0.223356	0.164463	0.0616542	0.424245	-0.334034	-0.221507	0.131403	0.158799	-0.00851502	0.134724	-0.221719
AC004543.1	0.105871	0	0	0	0	0	0	0	0	0	0	0.0950585	0	0	0	0	0	0.216509	0	0	0	0	0	0	0	0	0	0
AC004551.1	0.192854	0.00657565	0.0566845	0.00752416	0.00521478	0.105532	-0.00200038	0.0489617	-0.0478289	-0.00952875	-0.0478289	-0.00132075	-0.014943	-0.0239752	-0.263769	-0.506554	-0.269824	-0.388049	-0.506554	0.0597691	0.0778384	0	0	0.12133	0	0.227682	0.0667733	0.0688244
AC004554.2	-0.042501	-0.0168588	-0.0640921	-0.028525	-0.0328004	-0.00638261	0.0180968	-0.0314169	-0.0230423	-0.00524917	0.0127479	-0.0329035	-0.0342101	-0.0307324	-0.0472914	-0.0813104	-0.0378526	-0.0647812	0.0158559	-0.0315703	0.0534018	-0.104557	-0.0555625	-0.0587678	0.10124	-0.053607	-0.00136953	-0.0682331
AC004556.1	-0.55255	-0.387594	-0.327173	-0.402646	-0.629931	-0.448078	-0.461026	0.0394313	-0.18256	-0.523848	-0.61206	-0.455174	-0.735639	-0.830542	0.563833	0.0306329	0.473526	0.365975	0.00971288	1.66e-05	0.0234073	0.149425	0.00849956	0.00362083	0.0322806	0.118363	0.0373803	-0.00391902
AC004584.1	0.3654	0.209824	-0.0223084	0.029645	0.147083	-0.473755	-0.577341	-0.184066	-0.405394	-0.424644	-0.37525	-0.452834	-0.386401	-0.493984	0.311564	0.0153186	0.529929	0.394907	0.137981	-0.043821	-0.00579173	-0.0302459	-0.0806021	0.0480333	0.0689406	0.319406	-0.151025	-0.206124
AC004585.1	-0.0944805	-0.230048	-0.0788212	-0.276963	0.0536347	0.58392	0.449145	0.414553	0.428649	0.610218	0.621257	1.66391	0.534694	0.221789	-0.398289	-0.673019	-0.71537	-0.561785	-0.454931	0.0690214	-0.343491	-0.511806	-0.566821	-0.856402	-0.843877	-0.880846	-1.21785	-0.944646
AC004590.1	-0.101685	-0.0428481	-0.0410833	-0.101685	-0.101685	0	0.0549947	0.0619951	0.113473	0.208781	0.0603661	0.0679982	0.154128	0.0607183	0.259825	0	0	0	0.147792	0.163244	0.0919944	0	0.066944	0	0	0	0	0.0744812
AC004593.1	0	0	0	0	0	0	0	0	0	0	0	0	0	0.0454978	0	0	0	0	0	0	0	0	0	0	0	0	0	0
AC004593.3	0	0	0	0	0	0	0	0	0	0	0	0	0	0	0.00943104	0.0445343	0.00244936	0	0	0	0	0	0	0.00238206	0	0	0	0
AC004594.1	0	0	0	0	0	0	0	0	0	0	0	0	0	0	0.312263	0	0.000105265	0.343392	0.459877	0	0	0.0646356	0.0520666	0	0	0	0	0
AC004596.1	-0.0580278	-0.0580278	-0.000612662	-0.0580278	-0.0580278	0	0	0	0.0459179	0.0429434	0.0572678	0	0	0.181283	-0.0495174	-0.273758	0.00854066	-0.321163	-0.236267	0.0884662	0.213615	0.1335	0.170108	0	0.0928412	0	0.0753729	0.191062
AC004597.1	0	0	0	0	0	0	0	0	0	0	0	0	0	0	0	0	0	0	0	0	0	0	0	0	0	0	0	0
AC004637.1	0	0	0	0	0	0	0	0	0	0	0	0.0610749	0	0	-0.12395	-0.282604	-0.116734	-0.130805	-0.282604	0	0	0	0	0.0829563	0	0	0	0
AC004672.1	0	0	0	0	0	0	0	0	0	0	0	0	0	0	0	0	0	0	0	0	0	0	0	0	0	0	0	0
AC004674.1	0	0	0	0	0	0	0	0	0	0	0	0	0	0	0	0	0	0	0	0	0	0	0	0	0	0	0	0
AC004687.1	0	0	0.0133239	0.014678	0	0	0	0	0	0.0227762	0	0	0	0	0	0	0	0	0	0.0226217	0.0218494	0	0	0	0	0	0	0
AC004690.2	0	0	0.0243356	0	0	0	0	0	0	0.0103068	0	0	0	0.00735487	0.0948284	0	0	0	0	-0.0392869	-0.0392869	-0.0392869	-0.0392869	-0.0392869	-0.0392869	-0.0392869	-0.0392869	-0.023344
AC004691.1	0	0	0	0	0	0	0	0	0	0	0	0	0	0	0.167122	0.107281	0.231271	0.153237	-0.158343	0	0	0	0	0	0	0	0	0
AC004691.2	0.0142427	-0.0147684	0.00437058	0.00514073	0.0148376	0.090394	0.0742459	0.0300941	0.0319171	0.0169023	0.0396118	0.169483	0.0676026	0.113699	0.147413	0.122003	0.208273	0.139277	0.147493	0.0223339	0.0186209	0.0701926	0.0469045	0.0625965	0.223596	0.0487037	0.0813309	0.0252945
AC004692.2	0.125378	0	0	0	0	0.0751732	0	0	0	0.049283	0	0	0.0449817	0.0425196	0	0	0	0	0	0	0	0	0	0	0	0	0	0
AC004702.1	0	0	0	0	0	0	0	0	0	0	0	0	0	0	0	1.52e-08	0	0	0	0	0	0	0	0	0	0	0	0
AC004704.1	-0.0749085	0.0497349	0.2279	-0.051053	-0.1428	-0.494905	-0.601633	-0.496233	-0.499126	-0.385917	-0.212435	-0.829753	-0.414593	-1.11306	-0.379369	-1.1638	-1.12555	-1.35316	-0.84546	-0.211138	-0.0795487	-0.263617	-0.424218	-0.523963	-0.406329	-0.408943	-1.29018	-0.301303
AC004706.1	-0.0234435	-0.0234435	-0.0234435	0.00380565	-0.0234435	0	0.0255554	0	0	0	0	0.0396799	0	0.0139104	-0.140108	-0.121916	-0.239096	-0.246217	0.0216509	0.0234406	0.0673748	0.0365719	0	0.0394059	0	0	0.0384341	0
AC004707.1	-0.322296	-0.314134	-0.422605	-0.358733	-0.223026	0.192033	0.243605	0.31677	0.45006	0.157591	0.188873	0.205755	0.657106	0.687135	0.497827	0.309681	0.343677	0.766064	0.425213	0.0105119	0.00570502	0.043952	0.062085	-0.0355873	0.0525381	0.0112573	-0.105406	-0.100298
AC004754.1	-0.0279172	0.00735773	-0.0425302	0.106576	-0.0250862	0.0984969	0.114323	0.180886	0.225991	0.401654	0.406165	0.971266	2.03509	2.79382	0.632001	0.174101	0.359538	0.480646	0.850075	0.0504479	-0.0994952	-0.0939038	0.0504179	0.111324	0.126705	0.0989868	0.429661	0.325465
AC004771.1	0.0085027	0.00644425	0.00788287	0.0545227	0.00510282	0	0.191548	0	0	0.129097	0.0526227	0	0	0.0961058	0.55678	0.225389	0.123363	0.643031	0.279493	-0.0408711	-0.114353	0.11716	-0.114353	0.0157363	-0.114353	0.0448086	-0.048852	-0.114353
AC004771.2	0.0254266	0.161995	-0.0500947	0.244679	0.155755	-0.147001	-0.0771611	-0.147001	-0.147001	-0.0941735	-0.066012	-0.0759607	-0.0898035	0.185977	0.32783	0.151415	0.498217	0.341618	0.329334	0.0538718	-0.00602011	-0.118097	-0.118097	-0.0339262	-0.118097	0.0544926	0.670328	0.0547286
AC004771.3	-0.0348109	-0.0924143	-0.314578	0.0793911	-0.248483	-0.0891932	-0.0374259	-0.283082	-0.140509	0.226277	0.332838	0.338486	0.541581	0.820152	0.334259	0.298283	0.69974	-0.131611	0.678083	-0.377095	0.181248	0.021483	0.433783	0.250847	-0.0951704	-0.124374	0.241532	-0.0103873
AC004771.4	-0.167314	-0.167314	-0.167314	-0.167314	-0.0980544	-0.072591	-0.072591	0.0573725	-0.072591	-0.072591	-0.072591	-0.072591	-0.0213286	-0.00283604	-0.000223344	0.000293988	0.0011488	0.000795671	0.00167195	-0.0942212	0.107961	-0.0942212	0.0714356	-0.0942212	-0.0942212	0.0403959	0.181625	-0.0942212
AC004771.5	0.0372984	-0.0205987	0.0275768	0.122133	-0.0810201	-0.0415044	0.0368729	0.0861296	-0.00585017	0.11155	0.363386	0.0908119	0.70011	0.264407	-0.0182663	-0.570077	0.313981	-0.173455	0.0637929	0.0565549	0.0314878	0.0759555	-0.0529454	-0.0529454	0.319584	-0.0529454	-0.0529454	0.195994
AC004775.1	-0.0569724	-0.0569724	-0.0227126	-0.0249628	-0.0569724	-0.361864	-0.385056	-0.385056	-0.317975	-0.359311	-0.385056	-0.385056	-0.358926	-0.348725	0	0	0	0	0	0.0417584	0	0.185025	0.0392925	0	0.0749888	0	0	0
AC004784.1	-0.373062	0.260636	0.157975	-0.351457	-0.232356	0.00344943	0.167947	0.659812	0.685327	0.555339	0.663358	0.812102	0.790191	0.771427	0.53568	0.420952	0.342645	0.123761	0.861662	0.0363631	-0.198015	0.174196	0.0588243	0.118176	0.561041	0.125613	0.617949	-0.211148
AC004801.3	0	0	0	0	0	0	0	0	0	0	0	0	0	0	0	0	0	0	0	0	0	0	0	0	0	0	0	0
AC004801.4	0	0.00729646	0	0	0	0	0.0119295	0	0	0	0	0	0	0	-0.0392309	-0.0392309	-0.015847	-0.0197859	-0.0195022	-0.0241852	-0.0242518	-0.0241601	-0.0242518	-0.0242518	-0.0242518	-0.0242518	-0.0242398	-0.0242518
AC004801.5	0	0	0	0	0	0	0	0	0	0	0	0	0	0	0	0	0	0.134735	0	0	0	0	0	0	0	0	0	0
AC004801.6	0.038276	0.0427373	0.198975	0.0775345	-0.0770162	-0.0788872	-0.132306	-0.155326	-0.162444	-0.213078	-0.206146	-0.273441	-0.345489	-0.25182	-0.115834	-0.0538828	0.060235	-0.050149	-0.115834	0.116386	0.00565382	-0.116917	0.133744	0.00382653	0.0732329	-0.0424807	0.105357	-0.00516715
AC004803.1	0.368014	0.397501	0.171001	0.283023	-0.0283133	0.0619693	0.153166	0.0234595	0.000968463	-0.417278	0.142049	-0.152221	0.184276	0.098816	0.142737	0.292556	0.249369	-0.00395527	0.411711	0.269257	0.275587	0.485531	0.260393	0.509946	0.72653	0.756135	1.32632	1.07162
AC004805.1	-0.00297006	0.0791044	0.0507934	-0.035908	-0.00496621	0.033054	-0.0156315	-0.0128192	-0.0288797	-0.0195046	0.0235568	0.0741993	0.0711157	-0.00120632	-0.0220497	-0.00917319	0.0378556	0.00137711	0.0348242	-0.00346313	-0.0108325	0.00697764	-0.0001261	0.0406167	0.0615778	0.0245446	0.0666744	0.0379736
AC004812.2	0.104441	-0.0968162	-0.268693	-0.226821	-0.259078	-0.0473389	-0.0733633	-0.263052	-0.342625	-0.265654	-0.298444	-0.474504	-0.380306	-0.573588	-0.291301	-0.252705	-0.283533	0.0579784	-0.00987887	0.0924353	0.29116	0.250253	0.238507	0.24241	0.162474	-0.181687	-0.0940283	0.193196
AC004816.1	0.330757	0.286473	-0.0458944	-0.0522656	-0.622638	0.164625	-0.379194	-0.272082	-0.738521	-0.861352	-0.952021	-1.37989	-1.41276	-1.46702	-0.0360368	-0.495048	0.119177	0.0616858	-0.22667	0.353055	0.749604	0.229562	0.0292415	0.185046	-0.385555	-0.0662455	0.268362	0.224263
AC004816.2	-0.171323	0.139772	-0.171323	-0.171323	-0.171323	0.380271	0.974251	0.328093	1.58847	0.669408	0.138874	0.3602	0.380167	0.500803	-0.272879	-1.04866	-1.38693	-0.89896	-1.70588	0.548583	-0.354822	0.23564	-0.680035	-0.24642	-0.720281	-0.639235	-1.20032	-0.737855
AC004817.1	0	0.0402074	0.0385111	0	0	0	0	0	0	0	0	0	0.027576	0	-0.0250026	0.225339	0.16384	-0.109664	-0.0221166	0	0	0	0	0.0916696	0	0.0452289	0	0
AC004817.2	0	0	0	0	0	0	0	0	0	0	0	0	0	0	0	0	0	0.207496	0.198287	0	0	0	0	0	0	0	0	0
AC004817.3	-0.0219325	-0.0135195	0.0163471	-0.00470082	-0.0237557	0.00161893	-0.0103817	-0.0281527	-0.0370365	-0.020454	-0.0268902	-0.0166764	0.0184752	0.00873947	0.045562	0.153028	0.0738379	-0.09803	-0.0389578	0.00544976	0.0453666	0.00443058	0.0313145	0.0374622	0.0267115	0.0727665	0.0427968	0.0283745
AC004817.4	-0.0113552	0.0339032	-0.0155866	-0.0143484	-0.0567794	0.00768635	0.0335418	0.0765385	0.0409145	0.0379458	0.0466775	0.00836398	0.105793	0.0358907	0.111777	0.0528337	0.0497582	0.110095	0.156159	-0.0308522	-0.0125333	0.0214937	-0.0310708	-0.0161634	-0.00239679	0.00346662	-0.0257471	-0.0542503
AC004824.1	-0.434297	-0.133287	-0.434297	-0.145797	-0.434297	-0.382059	0.0468618	-0.382059	-0.142273	-0.382059	-0.382059	-0.20033	-0.382059	-0.382059	2.25e-05	1.22e-05	-2.07e-05	-7.97e-06	9.26e-06	0	0.275172	0	0	0	0	0	0	0
AC004825.2	0.429998	0.446392	0.0443436	0.135952	0.00735364	0.324379	0.281962	0.124678	0.0672673	0.335808	0.405521	-0.51079	0.688948	0.762567	-0.482202	-0.204774	-0.844666	-0.353152	-0.386861	-0.316988	-0.00446852	-0.206334	-0.270125	-0.17723	-0.0421299	-0.182107	0.0421578	-0.43949
AC004828.1	0.0876505	0	0.0442724	0.0410379	0	0	0.280299	0	0.209378	0.064169	0.0364268	0	0.033333	0	0	0	0	0	0.108689	-0.0651458	-0.0651458	-0.0651458	-0.00794875	0.0432776	0.00428003	-0.0651458	-0.0651458	-0.0154642
AC004830.1	0	0	0	0.0330257	0	0	0	0.0348681	0	0	0	0	0	0	0	0	0	0	0	0	0	0.0717852	0	0	0	0.0371342	0	0
AC004832.1	0	0	0	0	0	0	0	0	0.0470717	0	0	0	0	0.0137795	-0.086961	0.110666	0.122557	-0.00678986	-0.0279531	0.0570179	0	0	0	0	0	0	0.0326878	0
AC004832.3	-0.51629	-0.39964	-0.220638	-0.376819	0.0938376	-0.30512	-0.531403	-0.578117	-0.499927	-0.297193	-0.432693	-0.603305	-0.899002	-1.08593	-0.000922742	0.283366	-0.180315	0.298054	-0.181941	0.388441	0.0702566	-0.240773	0.177537	-0.432236	0.199424	-0.225537	-0.238221	-0.431762
AC004832.6	-0.0694147	-0.0694147	-0.0694147	-0.0694147	-0.0694147	0.0476333	0	0.0392514	0.0370689	0	0.0331657	0	0.0305963	2.77897	-0.219544	-0.219544	-0.219544	-0.219544	-0.119322	-0.0890602	0.19253	-0.0890602	-0.037111	-0.0890602	-0.0254771	-0.0890602	0.0497965	-0.0890602
AC004834.1	0.133343	-0.0849975	-0.019291	-0.0332399	-0.0123821	0.0440454	0.0042188	-0.00365917	0.0647551	0.0580249	0.0945793	0.0509675	0.11858	0.222808	0.020484	-0.263619	-0.102282	-0.0504643	-0.260876	0.00583565	-0.0176961	-0.00249269	-0.00408987	-0.0201787	0.0286132	-0.0012465	-0.0932346	-0.0366533
AC004835.1	0.0615959	-0.000172149	0.0169203	-0.00905894	-0.00437155	-0.0123502	-0.0530681	-0.0592598	-0.0288928	-0.0196644	-0.0310971	-0.0558996	-0.0125903	-0.0468357	0.068196	-0.0406695	-0.0331848	0.256007	0.150398	-0.0597054	-0.0407504	-0.062823	-0.0325857	-0.0621169	-0.0595697	-0.0821361	-0.0701835	-0.0725948
AC004837.2	0	0	0	0	0	0.0449376	0	0	0	0	0	0	0	0	-0.0831618	-0.101378	-0.320193	0.00963761	-0.413799	0	0	0	0	0	0	0	0	0
AC004837.3	0	0	0	0	0	0	0	0	0	0	0	0	0	0.0601029	-0.00445653	-0.00445653	-0.00445653	0.117971	-7.8e-05	0	0	0	0	0	0	0	0	0
AC004839.1	0.0175886	0.140331	-0.0524252	0.342267	0.180254	-0.197484	-0.325695	-0.406766	-0.474668	-0.357928	-0.468785	-0.534737	-0.450592	-0.47865	-0.191657	-0.327099	0.116405	-0.465004	-0.313825	-0.00728967	0.0864719	-0.18746	-0.132939	-0.344618	-0.055286	-0.206034	-0.263222	-0.2087
AC004846.1	-0.179479	-0.449999	-0.455412	-0.0264081	-0.295697	-0.208328	-0.0678442	-0.184032	-0.255642	-0.168654	-0.211785	-0.118955	-0.976482	-1.26922	0.199377	0.326247	0.194826	0.0304832	-0.057906	0.0510689	0.256337	0.471317	0.432341	0.612585	0.707677	0.47363	0.721924	0.738834
AC004846.2	0.371819	0.267524	0.133683	0.0456305	-0.0507418	-0.0818287	0.0431701	-0.0116105	-0.123594	0.0253489	0.0443195	-0.0362671	-0.039667	-0.140199	0.29268	0.152323	0.276762	-0.00633158	0.194039	0.0898456	0.0740505	-0.233311	-0.00175959	0.0581397	0.112808	0.0442952	-0.237392	-0.0375677
AC004852.2	0.00944851	0	0.00938019	0.00879259	0	0	0	0	0.00938187	0	0	0	0	0.0072431	-0.0976768	0.0150834	-0.0687068	0.0737524	-0.00495269	-0.0152865	-0.0152865	-0.0152865	-0.0152865	-0.00220425	-0.0152865	-0.00298258	0.0342931	-0.00515621
AC004854.2	0.244421	0.248119	0.0144546	0.189344	-0.0415726	0.130426	0.16711	0.296844	0.257026	0.105377	0.0986162	0.249344	0.370665	0.118722	-0.0127026	0.252846	0.144273	0.0330784	0.55579	0.370522	0.282388	0.311392	0.306836	0.338755	0.504565	0.307788	0.769786	0.529323
AC004862.1	0	0	0	0	0	0.160251	0.117808	0	0	0	0	0	0.0103856	0.327484	0	0	0.117572	0.262592	0	0	0	0.157418	0	0	0.157054	0.15273	0	0.0637729
AC004865.2	-0.117327	-0.0928137	-0.119311	-0.0605067	-0.121431	-0.0313646	-0.189982	-0.109192	-0.134198	-0.175641	0.000111437	-0.132597	-0.326659	-0.18634	-0.473159	-0.399938	-0.536215	-0.398625	-0.53977	0.123874	0.0162788	0.334207	0.414891	0.443198	0.899948	0.184251	0.34269	0.207506
AC004869.1	0	0	0	0	0	0	0	0	0	0	0	0	0	0	0	0	0	0	0	0	0	0	0	0	0	0	0	0
AC004869.2	0	0	0	0	0	0	0	0	0	0	0	0	0	0.148047	0	0	0	0	0	0	0	0	0	0	0	0	0	0
AC004870.3	0	0	0	0	0	0.138062	0	0	0	0	0	0	0	0	0	0	0	0	0	0	0	0	0	0	0	0	0	0
AC004870.4	0	0	0	0	0	0	0.0653221	0	0	0.0501616	0	0	0.0964855	0.0548876	0	0	0.244886	0	0	0	0	0	0	0	0	0	0	0
AC004872.1	0	0	0	0	0	0	0	0	0	0	0	0	0	0	0	0	0	0	0	0	0	0	0	0	0	0	0	0
AC004875.1	0	0	0	0	0	0	0	0	0	0	0	0	0.0714654	0.0440355	0	0	0	0	0	0	0	0	0	0	0	0	0	0
AC004877.1	0.0765205	0.0352857	0.0375318	0.0559349	0.0858487	0.0181976	-0.00519962	0.0110667	0.0189055	0.00509696	0.0262437	0.0150081	0.0917262	0.221854	0.0459531	0.0568374	0.0939676	0.0603596	-0.0105827	0.0193835	0.0209855	0.0520161	0.0227802	0.0432482	0.0278058	0.0504726	0.163164	0.00884785
AC004882.1	0	0	0	0	0	0	0	0	0	0	0	0	0.135324	0	0	0	0	0	0	0	0	0	0	0	0	0.113015	0	0
AC004882.2	0	0	0	0	0	0	0	0	0	0	0	0	0	0	0	0	0	0	0	0	0	0	0	0	0	0	0	0
AC004884.2	-0.0464771	-0.0464771	-0.0464771	-0.0464771	-0.0464771	0	0	0	0	0	0	0	0	0	-0.200875	-0.0466502	-0.173912	-0.242225	-0.551667	0	0	0	0	0	0	0	0	0
AC004888.1	0	0	0	0	0	0	0	0	0	0	0	0	0	0	-0.139861	-0.139861	-0.139861	-0.139861	-0.139861	0	0	0	0	0	0	0	0	0
AC004889.1	0.138598	-0.330334	-0.152799	-0.214928	-0.47229	-0.020803	-0.309349	-0.765697	-1.41572	-1.24734	-1.44826	-1.66459	-1.66125	-1.70116	0.629373	0.164483	0.79851	-0.154861	0.336268	0.145231	0.630488	0.198689	0.0606247	0.43006	0.240033	0.397336	0.723077	0.166558
AC004895.1	0	0.0563814	0	0.0613578	0.110393	0	0	0	0	0	0	0	0	0	-0.05287	-0.200995	-0.0298526	-0.319528	-0.191101	-3.23e-05	-3.23e-05	0.076241	-3.23e-05	-3.23e-05	-3.23e-05	0.0652463	0.222399	-3.23e-05
AC004906.1	0	0	0	0	0	0	0	0	0	0	0	0	0	0	0	0	0	0	0	0	0	0	0	0	0	0	0	0
AC004908.1	-0.244744	-0.244744	-0.128926	-0.244744	-0.244744	0.136105	0.55876	0	0	0.0394118	0	0	0.0400315	0	-0.583266	-0.571635	-0.435494	-0.536105	-0.417914	-0.116524	-0.113312	-0.017543	-0.00794553	-0.136842	-0.197962	-0.0721639	0.108882	0.0512557
AC004908.3	-0.235457	-0.232653	-0.193362	-0.0638697	-0.237999	-2.51409	0.479501	-2.0222	-0.75627	-2.46741	-2.56977	-1.88154	-2.4719	-2.51719	-0.588326	-0.474863	-0.555622	-0.490938	-0.318771	0.236492	0.47078	0.216534	0.420102	0.322414	0.283348	0.369867	0.788999	0.364938
AC004918.1	0.00451313	-0.0490706	-0.0974307	-0.0767357	-0.274616	0.0170629	-0.0249272	-0.0407007	-0.208311	0.0765097	0.0881569	-0.144811	-0.143756	-0.254339	-0.504774	-0.957016	-0.742109	-1.0716	-0.759716	0.160442	0.236042	0.325175	0.36586	0.162254	0.532256	0.268882	0.223362	-0.229805
AC004920.1	0	0	0	0	0	0	0	0	0	0	0	0	0	0	0	0	0	0	0	0	0	0	0	0	0	0	0	0
AC004921.1	0.0358904	0	0	0	0	-0.0337343	-0.0337343	-0.0337343	-0.0337343	0.0233358	0.0399612	-0.0337343	-0.0337343	-0.0163407	0	0	0	0.00186647	0	0	0	0	0	0.0494009	0	0	0	0
AC004922.1	-0.07674	-0.115082	0.0874304	-0.124069	-0.0126939	-0.139767	-0.0701285	-0.260182	-0.191887	-0.0283317	-0.102651	-0.378901	-0.527573	-0.921648	-0.113138	-0.0597101	-0.184981	-0.36839	-0.513259	0.25339	0.543499	0.357626	0.166133	0.140828	0.363127	0.00705212	0.0509159	0.186772
AC004923.4	0.0435005	-0.0642659	0.00513379	-0.0254415	-0.0642659	-0.0464449	-0.070232	0.0978116	0.0265086	0.0126143	0.00318602	-0.0304988	0.084223	0.0595129	0.616097	0.728733	0.828278	0.233355	0.717058	0.163225	0.024814	-0.0397182	0.0826442	-0.135235	-0.0193567	-0.135235	-0.0440169	-0.0199787
AC004930.1	-0.405693	-0.421533	-0.0642277	0.0189299	-0.0837544	-0.325933	-0.21322	-0.0186305	-0.13601	-0.0932792	0.220254	0.937371	0.305478	0.718512	0.893192	0	0	0.356725	1.98199	-0.215539	-0.662129	-0.662129	-0.418441	-0.662129	-0.662129	-0.462282	1.08283	0.846371
AC004936.1	0	0	0	0	0	0	0	0	0	0	0	0	0	0	0.23544	0	0	0	0	0	0	0	0	0	0	0	0	0
AC004941.1	0.0064296	-0.0130641	-0.0130641	-0.00680246	-0.0130641	0.00442773	0	0.00692414	0	0.00558086	0.00713635	0.00741892	0.0111018	0	-0.150955	-0.083546	-0.120521	-0.161437	-0.142664	-0.00567732	0.00998255	0.0035102	-0.0024583	-0.00237358	-0.0114741	0.0219852	0.00902047	-0.00291551
AC004943.1	0.12966	-0.08585	-0.235807	-0.236172	-0.274976	0.0243693	-0.233188	-0.143884	-0.0768231	-0.17945	-0.246898	-0.311117	-0.293995	-0.283989	-0.0420723	-0.390428	-0.254569	-0.333377	-0.335706	-0.093473	-0.172945	-0.0569948	-0.0721592	-0.126896	-0.118845	0.0504873	-0.204411	-0.217607
AC004943.2	0.000237759	-0.213131	-0.124259	-0.281002	-0.0781869	-0.243683	-0.461836	-0.562171	-0.401629	-0.598498	-0.62216	-0.744845	-0.980006	-1.01872	-1.21416	-1.34687	-1.22079	-1.19809	-1.22579	0.458063	0.393157	0.269866	0.133072	0.00500381	-0.0161334	-0.274442	-0.358015	-0.262126
AC004943.3	0.00754193	-0.0402821	0.00696583	0.00639211	0.00428797	0.0133308	-0.0456686	0.00293015	-0.0456686	0.0569429	0.00481965	-0.0456686	-0.0456686	-0.0456686	-0.123254	-0.123254	-0.123254	-0.123254	-0.123254	0	0	0	0.100915	0	0	0	0	0.04874
AC004944.1	0	0	0.00662137	0.00731421	0	0	0	0	0	0	0	0.00617465	0	0	0	0	0	0	0	0	0	0.0100368	0	0	0	0	0	0.0087394
AC004946.1	0	0	0	0	0	0.0232747	0.0314218	0	0	0	0	0.0485108	0	0.0247482	0	0	0	0	0	0	0	0	0	0	0	0	0	0
AC004947.1	0	0	0	0	0	0	0	0	0	0	0	0	0	0	0	0	0	0	0	0	0	0	0	0	0	0	0	0
AC004948.1	-0.0404873	-0.0404873	-0.000382259	-0.00301588	-0.0404873	0	0	0	0	0	0.0430486	0.160046	0.0301296	0.0225269	0.169681	0	0	0	0	0.0608847	0	0.08395	0	0	0	0	0.054052	0
AC004949.1	0	0.00659815	0	0	0	-0.00619421	-0.00619421	-0.000309894	-0.00619421	-0.00619421	-0.00619421	-0.00619421	-0.00619421	-0.0027773	-0.0709437	-0.038179	0.04078	-0.0154279	-0.0511916	0	0	0	0	0.00960777	0	0.0169677	0	0.00856445
AC004951.1	0.103114	-0.110812	-0.141096	-0.132192	-0.116924	-0.0071076	-0.123119	-0.13215	-0.204067	-0.232527	-0.268601	-0.251618	-0.376385	-0.545412	-0.272381	-0.398561	-0.0950174	-0.320607	-0.756616	0.268878	0.159758	0.134488	0.0590755	0.224912	0.20357	-0.0892487	-0.125881	-0.14867
AC004969.1	0.0505885	0	0	0.0494277	9.56985e-06	0.0622553	0.0452133	0.0518214	0.0885712	0	0.0532846	0.0461481	0.0692932	3.01186	0.019416	-0.222027	-0.22165	-0.220326	0.0192163	-0.000481499	0.0293076	0.0214661	-0.0476134	-0.0481064	-0.0481064	-0.0451832	-0.0480799	-0.0480918
AC004973.1	-0.114465	-0.0702714	-0.0288415	-0.114465	-0.0716404	0.405611	-0.0053626	-0.00137675	-0.0461756	-0.0125247	-0.0461756	0.00286829	0.0208311	-0.0155818	0.113532	0.0159758	0.0290976	0.162468	0.533448	-0.0321595	-0.00126015	0.0485403	0.0407956	-0.00829362	0.00433445	-0.0206201	-0.0678337	0.12162
AC004975.2	0	0	0	0	0	0	0	0	0	0	0.0550836	0.0716113	0	0	-0.244492	-0.244492	-0.244492	-0.244492	-0.244492	0	0	0	0	0	0	0	0	0
AC004982.1	0.0168961	-0.00859642	0.0296769	0.0671765	-0.00903621	-0.00929899	0.0104234	-0.0142838	0.058204	0.0176174	0.0262565	-0.00717561	0.0176657	0.0484083	0.0962524	-0.0413265	-0.0413265	0.0663486	0.0667482	0.00303206	-0.0463822	0.00936548	0.0358849	0.0232822	0.180507	0.0175703	0.149942	0.0132609
AC004982.2	0.324918	0.0566693	0.0525211	0.161869	-0.000199062	-0.0428219	-0.10863	-0.0498713	-0.147115	0.262709	0.255069	-0.00931415	-0.0537326	0.051372	-0.00361317	0.00575059	-0.115703	-0.0786862	0.500603	0.0352254	-0.0687693	0.383853	0.0817452	0.488746	-0.052521	0.15159	0.481108	0.0137389
AC004988.1	0.151825	0.153984	-0.0277857	0.0442736	-0.040217	0.134912	0.412672	0.412116	0.198642	0.0130064	0.0113498	0.494717	0.136922	0.999121	0.00670659	0.118813	0.0123461	-0.0517389	0.20964	0.00111761	-0.00909288	0.00499189	0.0398005	0.0490669	-0.0294367	0.155366	0.962904	0.416846
AC004990.1	0.0915654	0.0113309	0.0750002	0.0293844	0.0454895	0.120993	0.00748055	-0.0192285	-0.00335184	0.00238594	0.0626161	-0.0304642	0.00545167	0.0671715	-0.0526626	-0.0472987	0.420205	0.0769454	0.0353929	0.0458534	0.109982	-0.0368879	0.0904992	0.086069	-0.0288	0.00469746	-0.0592874	0.00620387
AC004994.1	0	0	0	0	0	0	0	0	0	0	0	0	0	0	-0.252932	-0.252932	-0.252932	-0.252932	0.0125728	0	0	0	0	0	0	0	0	0
AC004997.1	0.179024	0.0940171	-0.0924745	0.136579	0.0785716	0.310157	0.0626554	0.158707	0.319152	0.431206	0.404266	0.780342	1.02096	0.778991	0.307417	0.595582	0.619009	0.55662	0.685062	-0.231058	0.196379	0.196627	0.25246	0.204843	0.767592	0.0889408	0.458715	0.388497
AC005005.3	0.0868513	0.0675845	0.0431554	0.167446	0.103035	0.114449	0.0478471	-0.0501535	0.0525562	0.0450872	0.0209704	-0.0352768	0.0836188	0.0955236	0.404378	0.0931035	0.0275644	0.439011	0.0648235	0.0770774	0.0679346	-0.0337095	0.0333814	0.0914923	0.101701	0.102325	0.129863	0.0107499
AC005008.2	0	0	0	0	0	0	0	0	0	0	0	0	0	0	0	0	0	0	0	0	0	0	0	0	0	0	0	0
AC005009.1	0	0	0	0	0	0	0	0	0	0	0	0	0	0	0	0	0	0	0	0	0	0	0	0	0	0.201181	0	0
AC005009.2	0	0	0	0	0	0	0	0	0	0	0	0	0	0	0	0	0	0	0	0	0	0	0	0	0	0	0.0532162	0.0471717
AC005013.1	0	0	0	0	0	0	0	0	0	0	0	0	0	0	0	0	0	0	0	0	0	0	0	0	0	0	0	0
AC005014.2	-0.0403822	0.101464	0.140361	0.0956757	0.00765491	-0.00817304	0.285582	0.0396624	0.0583347	0.0812422	0.00437959	0.226812	0.00489504	-0.0381981	-0.157642	0.16854	-0.142657	0.0737027	-0.268555	0.12658	0.226521	-0.0899424	-0.0899424	0.228478	0.364551	0.154472	-0.0899424	0.160864
AC005014.3	-0.324449	0.0876487	-0.324449	-0.324449	-0.324449	-0.129956	-0.359617	-0.359617	-0.359617	-0.145125	-0.359617	-0.359617	-0.144035	-0.359617	0.185801	-0.242079	0.525091	-0.845494	0.693003	-0.927194	-0.927194	-0.927194	-0.927194	-0.584953	-0.927194	-0.593584	-0.927194	-0.927194
AC005019.2	0	0	0	0	0	0	0	0	0	0	0	0	0	0	0	0	0	0	0	0	0	0	0	0	0	0	0	0
AC005020.2	-0.00804025	0.0112061	0.0531629	0.134309	0.011292	0.384597	-0.00146417	0.572486	0.0701374	0.131969	0.0896967	0.394621	0.239601	0.381492	0.0165168	-0.162476	0.0543938	-0.15861	0.117426	-0.0278155	-0.00518069	0.0650339	0.0968472	0.0493536	0.0989659	0.0338414	0.25858	-0.00792469
AC005021.1	0	0	0	0	0	0	0	0	0	0	0	0	0	0	-0.468536	-0.487285	-0.688559	-0.688565	-0.22849	0	0.155571	0.13177	0	0.133584	0	0	0	0
AC005034.2	0	0	0.0922783	0	0.0812351	0	0	0.0871374	0.0679545	0.0625368	0	0	0.110746	0.0441405	0	0.217223	0	0.184652	0	0	0	0	0.14013	0	0	0.280849	0.109545	0
AC005034.3	0.396671	0.0299377	0.209177	-0.32251	-0.442036	0.00999462	0.064817	0.107063	0.02133	-0.0825472	-0.124833	-0.0658269	-0.26824	-0.312492	0.00325763	0.186672	0.0416908	0.0641961	-0.280423	0.332396	0.262281	0.194968	0.263531	0.210731	0.174493	0.395363	0.0706615	-0.034465
AC005034.4	0.0570896	0.0325703	-0.0455152	0.0347753	0.00729524	-0.00735438	0.0707485	0.064758	0.167132	0.056015	0.0274995	-0.0257406	0.0582661	0.0646283	0.0501895	-0.0152959	0.0525213	0.0621858	0.051153	0.0625642	-0.0659098	-0.00197772	0.193461	-0.0132011	0.00418914	0.0449985	0.416992	-0.0136314
AC005037.1	-0.195285	-0.486404	-0.197328	-0.267314	-0.276914	0.116741	0.177676	0.151022	-0.0593807	0.133333	0.116828	-0.104122	-0.30712	-0.318329	0.330152	-0.0591254	0.0344656	0.121012	0.0834259	0.187377	0.19698	-0.0385436	0.0773326	0.000307222	-0.079271	-0.06816	0.22629	0.38303
AC005041.1	0.00292787	-0.00555343	-0.00249232	0.00617206	-0.00961682	0.00327204	0.0142037	-0.000384175	-0.00332408	0.0110059	0.00610994	0.00145509	0.0255998	0.0229461	0.00840715	-0.00380318	0.0247488	-0.0317919	-0.0459193	-0.00486338	-5.18e-05	0.024163	0.0164319	0.0023627	0.0171027	0.00191132	-0.00863481	-0.00681896
AC005041.3	-0.127106	-0.10597	0.0482169	-0.0286131	0.172717	-0.192818	-0.352586	-0.678816	-0.670957	-0.608856	-0.663213	-0.766162	-0.646433	-0.6966	0.176476	0.0637737	0.484248	0.128059	-0.310825	0.092192	0.207838	0.21705	0.118287	0.0656846	-0.128791	0.249709	0.126678	-0.00807089
AC005042.2	0	0	0	0	0	0	0	0	0	0	0	0	0	0	0	0	0	0	0	0	0	0	0	0	0	0	0	0
AC005046.1	0.0166478	0.212543	0.0505246	0.0863372	-0.0390145	0.156401	-0.00170324	-0.0377043	0.00154251	0.0348058	0.166254	-0.00496529	0.277821	0.127011	-0.147858	-0.0613387	0.260142	-0.350588	0.272994	-0.150987	-0.163278	-0.144875	0.0481107	-0.0712425	-0.156096	-0.182645	0.0454266	0.015737
AC005050.1	0.412814	0.644626	0.49711	0.0489432	0.0388116	-0.0166998	0.00327448	-0.0228652	-0.102188	-0.0342111	0.0212927	0.075904	-0.271717	-0.160071	0.256528	-0.172857	0.169003	-0.210762	0.254478	0.481181	0.270697	-0.0326951	-0.198254	-0.213319	-0.37053	0.266341	0.100306	-0.155608
AC005064.1	0	0.0238145	0	0	0	0	0	0	0.00750875	0.012524	0.128576	0.0425522	0	0.0523201	0.0670047	-0.0165177	0.00534423	-0.0165177	-0.0165177	0	0	0.0113426	0	0	0	0	0	0.00407229
AC005070.3	0.0399811	0.0540559	0.062349	0.0468962	-0.0242204	-0.0102385	0.0785208	0.065179	0.0841377	0.059261	0.0587705	0.0285313	0.0558579	0.0711734	-0.0653833	-0.170849	-0.000385738	-0.199882	-0.0537922	0.00781583	0.0333644	-0.010022	-0.00665541	0.0793314	-0.0228626	0.141454	-0.0133708	0.0451235
AC005076.1	-0.335601	0.139312	0.106103	0.522784	0.0820563	0.165781	0.419546	0.179927	0.081406	0.239026	0.282007	0.8419	0.429763	0.267996	-0.199655	-0.279881	0.377231	-0.371076	0.403012	0.280906	0.194763	0.0845625	0.34241	0.30981	0.38782	-0.133271	0.953707	0.149476
AC005082.1	0	0	0	0.00889348	0	-0.0065523	-0.0184239	-0.00862308	-0.00922753	0.00496658	-0.0184239	-0.00502876	-0.00280796	-0.0065126	-0.0929024	-0.0873342	-0.0634057	-0.0913456	-0.0699688	0.026176	0.0217795	0.0257962	0.00190978	-0.00913248	0.0830898	0.0259272	0.0197601	0.0105285
AC005086.1	0	4.29436e-05	6.36508e-05	0	0	0	0	0	0	0	0	0	0.0422632	0	0.00535064	0.147147	0.010575	0.00950774	0.33865	0.000145106	0	0	2.35e-07	0.0418561	0	0	0	0
AC005090.1	0	0	0	0	0	0	0	0	0	0	0	0	0	0	0	0	0	0	0	0	0	0	0	0	0	0	0	0
AC005091.1	0	0	0	0.0369626	0	-0.226171	-0.226171	-0.226171	-0.226171	-0.209802	-0.226171	-0.226171	-0.226171	-0.205086	-0.000520175	-0.000713178	0.0568242	0.0521719	-0.000406637	0	0	0	0	0	0.0335166	0	0	0
AC005096.1	0	0	0	0	0	0	0	0	0	0	0	0	0	0	0	0	0	0	0	0	0	0	0	0	0	0	0	0
AC005104.1	0	0	0	0.084877	0	0	0	0	0	0	0	0	0	0	-0.0259705	-0.517489	-0.760724	-0.599037	-0.396061	-0.315567	-0.315567	-0.315567	-0.315567	-0.315567	-0.315567	-0.315567	-0.315567	-0.315567
AC005144.1	-0.0316144	0.00662697	0.0448743	-0.0316144	0.00385838	-0.0357377	0.0978985	0.00313673	0.0230737	0.0785801	0.066126	-0.0357377	-0.0357377	-0.0357377	-0.0772065	-0.0772065	-0.0772065	-0.0772065	-0.0772065	0.00998442	-0.0667093	-0.150362	-0.229681	-0.134959	-0.166452	-0.182947	-0.229681	-0.229681
AC005150.1	0.0300595	-0.151692	-0.131625	-0.156996	-0.153292	0.00837798	-0.0469287	0.118864	-0.0469287	0.0195711	-0.00835858	-0.0469287	0.0735988	-0.0257167	-0.0152757	0.100869	0.0437691	-0.0254602	0.0974747	-0.0310755	-0.0426884	0.0488498	0.00720259	-0.0426884	-0.0426884	-0.0425118	-0.0426042	0.00978542
AC005154.4	0	0	0	0	0	0.412511	0.146928	0.0709279	0	0	0	0	0.109427	0.0364638	0.276692	-0.0838705	0.00648707	0.38415	0.13176	-0.111797	-0.111797	-0.111797	-0.111797	-0.111797	0.171379	-0.111797	-0.00757598	-0.111797
AC005154.5	0	0	0	0	0	0	0	0	0	0	0	0	0	0	0.240132	0.267736	-0.194194	0.713802	0.243542	0	0	0	0	0.133357	0.159962	0.108123	0	0
AC005154.6	0.514684	0.148246	0.42333	0.0124635	-0.603295	0.348968	0.257863	0.0921659	0.137698	-0.0107515	-0.00735765	0.620565	0.271146	0.33611	0.47192	0.37541	0.648524	0.586315	1.10407	0.245799	0.236567	0.636726	0.454415	0.766147	0.68054	0.770847	1.66502	0.925491
AC005162.1	0	0	0	0	0	0	0	0	0	0	0	0	0	0	0	0.177819	0	0	0	0	0	0	0	0	0	0	0.120958	0
AC005162.2	0	0	0	0	0	0	0	0	0	0	0	0	0.0326593	0	0	0	0	0	0	0	0	0	0	0	0	0	0	0
AC005162.3	0	0.00550893	0	0	0	0	0.00500242	0	0	0.00483419	0	0	0.00448847	0	-0.00153692	-0.0156251	-0.0144138	-0.0156251	-0.000891796	0	0	0	0	0	0	0	0	0
AC005165.1	-0.0235555	-0.0235555	-0.0235555	-0.0235555	-0.0235555	0	0	0	0	0.0334611	0	0	0.0150108	0	0.0288347	0	0.0342154	0	0	0.0529387	0	0.0259263	0	0.0401215	0	0	0	0
AC005180.1	0.0758758	-0.182936	-0.366045	-0.375288	-0.30862	0.0331345	-0.415378	-0.538473	-0.517207	-0.7689	-0.864211	-0.848696	-0.897685	-0.853382	-1.14034	-1.20838	-1.13118	-1.1644	-1.26452	0.33006	-0.286509	-0.0461262	-0.498581	-0.378107	-0.446941	-0.715728	-0.564525	-0.864646
AC005180.2	-0.0444549	-0.0444549	-0.0444549	-0.0433235	-0.0444549	0	0	0	0	0	0	0	0	0	-1.07497	-1.54968	-1.32303	-1.23641	-1.40778	-0.00975713	-0.052033	0.0539684	-0.0467931	0.026593	-0.0513092	-0.052033	-0.052033	-0.052033
AC005186.1	-0.0158468	-0.0204311	-0.0176418	-0.0163793	0.00862218	0.0694922	0.0852424	-0.0570623	-0.0570623	-0.0131338	-0.0318348	-0.0570623	0.223038	0.101319	-0.036842	0.0200725	-0.00298965	-0.180571	-0.0337607	0.098215	0.107943	0.349004	0.148673	0.200716	0.203291	0.120436	0.0464988	0.0427262
AC005197.1	0.258092	0	0.039146	0	0	-0.0150779	-0.00596971	0.0562564	-0.0415884	0.0197748	0.00051018	0.00267294	-0.0152751	-0.0195241	0.174992	-0.0106745	-0.0106745	0.0860479	0.0925115	0.222697	0	0	0.0540309	0	0.00219848	0	0	0
AC005208.1	0	0	0	0	0	0	0	0	0	0	0	0	0	0	0	0	0	0	0	0.0552465	0	0	0	0	0	0	0	0
AC005209.1	0	0	0	0	0	0	0	0	0	0	0	0	0	0	0	0	0	0	0	0	0	0	0	0	0	0	0	0
AC005220.1	-0.020933	-0.0468311	-0.0468311	-0.0468311	-0.0468311	0.0245768	-0.0293478	0.0245709	-0.00204508	0.0368782	0.0404208	0.0020568	-0.00632392	-0.0293478	-0.113949	-0.113949	-0.113949	-0.113949	-0.0450824	0.0829053	0.129179	0.0764246	0	0.0391348	0.0475557	0.0597746	0	0.0567301
AC005224.1	0.115533	0.115415	0.064988	-0.103194	-0.0135354	0.0441147	0.128391	0.0343126	-0.060882	0.0625694	0.0511294	0.033528	-0.0475567	-0.080577	-0.200106	-0.124179	-0.146991	-0.131005	-0.197172	0.0185667	0.146329	0.120205	0.0676861	-0.117679	0.28316	0.0184972	-0.10481	-0.112646
AC005224.2	-0.0248946	-0.0147786	-0.0369933	-0.0487868	-0.0381993	0.0793937	0.00385307	-0.0019913	0.00838939	-0.0078432	0.00143866	-0.0458296	0.00774883	0.0224161	-0.102524	0.012094	-0.0685992	0.107603	-0.0431687	0.0313437	0.0209551	0.00810311	0.00943655	0.0600586	-0.00652586	-0.0327421	-0.0135826	0.034301
AC005224.3	0.00663148	-0.0311677	0.108943	-0.0505419	0.0341711	-0.0175771	-0.00180103	0.0523917	0.0441399	0.0192509	0.014507	-0.00144428	-0.0127359	-0.0207596	-0.31217	-0.14285	-0.145301	-0.188768	-0.182777	-0.0143504	-0.0387801	-0.0183353	-0.00662906	0.00937022	0.00188456	0.0156824	-0.0553492	-0.0205264
AC005224.4	0.483196	-0.236853	-0.528637	-1.27339	-1.02204	-0.387848	-0.628764	-0.734319	-1.27105	-1.54302	-1.56077	-2.6002	-2.25787	-2.7076	-1.55303	-1.54398	-1.6715	-1.15571	-1.35856	0.466429	0.482365	0.252618	-0.0898948	-0.292463	-0.756979	-0.713967	-1.42607	-1.04377
AC005225.2	0.00424459	0.0120195	0.0924287	-0.0379072	0.206029	0.00850886	-0.0479342	-0.0479342	-0.0479342	0.0807882	0.0872052	0.0321767	0.114987	0.0392665	0.114897	0.105835	0.325889	0.109156	0	-0.188804	-0.188804	-0.125624	-0.0586829	-0.188804	-0.188804	-0.135203	-0.188804	-0.142153
AC005225.3	0.00919312	-0.0417124	-0.039995	-0.0336475	-0.0432232	0.112761	0.106688	0.0520058	0.243	0	0.253492	0	0	3.68877	0.214865	0	0.141439	0.242765	0.131693	0.0474498	0	0.117989	0	0.0649567	0.242642	0	0.234902	0.0725513
AC005229.4	0.0878457	-0.0680998	-0.173229	-0.20664	-0.20018	-0.129092	-0.221084	-0.208532	-0.280289	-0.184985	-0.22163	-0.504832	-0.58066	-0.76427	-0.287424	-0.315748	-0.40661	-0.4072	-0.359018	0.228133	0.170556	0.380449	0.23987	0.353178	0.325184	0.106084	0.0661752	-0.03493
AC005232.1	0	0	0	0	0.0424608	0	0	0	0	0	0	0	0	0	0	0.0360338	0	0	0	0	0	0	0	0.0417622	0	0	0	0
AC005234.1	0	0	0	0	0	0	0	0	0	0	0	0	0	0	0	0	0	0	0	0	0	0	0	0	0	0	0	0
AC005237.1	0	0	0	0	0	0	0.0490441	0	0	0	0	0.048522	0	0	0.130729	0	0	0	0	0	0	0.106672	0	0	0	0	0.0820294	0
AC005244.2	0	0	0	0	0	0	0	0	0	0	0	0	0.0277198	0	0	0	0	0.0910486	0	0	0	0	0	0	0.11997	0	0	0
AC005253.1	-0.0130916	-0.0129516	-0.0130916	-0.0130916	-0.00236756	-0.0100484	-0.000357378	-0.000537055	-0.00148229	-0.0100484	0.00081276	-0.000255175	-0.0014681	0.922392	-0.01243	-0.099429	-0.0153081	-0.0806539	0.103253	0.00909722	0.0522289	0.0158265	0.0125933	0.0124353	1.94e-05	0.0120969	0.0522284	0.0132296
AC005253.2	-0.0805462	-0.00331966	-0.0805462	-0.0805462	-0.00509394	0	0.071699	0.150861	0	0.459189	0.350934	0.0886305	0.0490267	0.0358306	0.276101	-0.255632	0.399097	0.200738	-0.373651	-0.14901	-0.14901	-0.0525016	-0.14901	-0.14901	-0.14901	-0.14901	-0.14901	-0.14901
AC005256.1	0.00683202	-0.0729441	-0.0729441	-0.0729441	0.0135671	-0.411347	-0.411347	-0.411347	-0.411347	-0.289282	-0.322798	-0.411347	-0.411347	-0.334468	0	0	0	0	0	0	0	0	0	0.169667	0	0	0	0
AC005258.1	0.0660311	0.00691344	-0.0175805	0.0412641	-0.00787077	0.00916611	-0.0851129	-0.0469637	-0.0701676	-0.0573485	-0.11237	-0.0246975	-0.111354	-0.109346	0.0393864	0.19058	-0.0341373	-0.128624	-0.159133	-0.0979021	-0.0439382	0.00996228	-0.0615645	0.0164652	-0.00277716	-0.097536	0.0542	-0.125954
AC005261.1	0.359269	0.0326825	0.0936128	0.0124865	-0.208649	-0.0451347	-0.0296888	-0.0351975	0.0944773	-0.11557	-0.136178	0.157747	-0.139996	0.0935986	-0.045997	-0.0234884	-0.109759	0.0751714	0.00194717	-0.703026	-0.697185	-0.65677	-0.479956	-0.579282	-0.535746	-0.142019	0.268835	-0.865535
AC005261.2	0.0306415	-0.0536389	-0.056594	-0.0785694	-0.0198402	-0.0442671	0.0389533	0.0831958	-0.03964	-0.0429576	-0.0833992	0.131594	-0.0278294	-0.0359498	0.210574	-0.101615	0.0324717	0.163754	-0.102677	-0.00793728	0.000988059	0.0811063	-0.00962249	0.0685703	0.00308187	0.0453739	0.00134745	-0.00828352
AC005261.3	0.385289	0.340008	0.412523	0.126594	-0.212163	-0.0330963	0.0377944	0.030688	0.0354364	-0.0923578	-0.0882448	0.102101	-0.419561	-0.288378	0.190066	-0.279402	-0.0178594	-0.187899	-0.00385088	-0.502988	-0.263631	-0.160874	-0.287874	-0.188305	-0.0269892	0.104998	0.465	-0.552579
AC005262.2	0.0827762	0	0.143931	0	0	-0.0717382	-0.0717382	0.00380653	0.122386	-0.0717382	-0.0717382	0.0281782	-0.0717382	-0.0230689	-0.000159849	0.158357	-0.000357496	0.000510021	0.45736	0	0	0	0.0804735	0	0	0.0847683	0	0
AC005264.1	0.0210011	0.0127856	-0.0151143	-0.0151143	-0.0151143	0.00303674	-0.000260448	-0.00850147	-0.00850147	-0.00127567	-0.000532677	0.0100383	0.0556882	0.0842364	-0.0446104	-0.0444317	-0.0172483	0.0065249	-0.0443642	0.017447	-0.0176974	-0.0176974	0.0254284	0.00802517	0.00328837	-0.00742918	0.054856	0.0266291
AC005277.1	0	0	0	0	0	-0.131854	-0.131854	-0.0249508	-0.0337946	-0.131854	-0.0126034	-0.131854	-0.131854	-0.131854	0	0	0	0	0	0	0	0	0	0	0.184656	0	0	0
AC005277.2	-0.0799854	-0.0799854	-0.0799854	-0.0799854	-0.0799854	0	0	0	0	0	0	0	0	0	0	0	0	0	0	0	0	0	0	0	0	0.195201	0	0
AC005280.2	0.410067	0.146822	0.276857	0.153527	0.123521	-0.103234	-0.0843346	-0.0972141	-0.0714949	-0.455202	-0.464953	-0.281394	-0.65065	-1.02647	0.161569	-1.01461	-0.597369	0.0430112	-0.427845	-0.0411742	0.138831	0.359625	0.235265	0.0536351	0.0699089	-0.272731	0.00823213	0.503882
AC005281.1	0	0	0	0	0	0	0	0	0	0	0	0	0	0	0	0	0.0765658	0	0	0	0	0	0	0	0	0	0	0
AC005288.1	-0.0333192	0.135411	0.0582446	0.0236602	-0.15978	-0.221517	0.166749	0.0648488	-0.00668011	0.0693152	0.0852134	0.14523	0.57537	0.369153	-0.493674	-0.611238	-0.689034	-0.844031	-0.765064	-0.0875551	-0.262093	0.0969933	0.0363346	-0.0725611	-0.201259	-0.116645	0.378413	0.146028
AC005291.1	-4.46267e-05	-2.79877e-05	-1.60135e-05	0.0407077	-2.82762e-05	-0.0856837	-0.0856837	-0.0856837	-0.0856837	-0.0856837	-0.0856837	-0.0856837	-0.0536796	-0.0856837	-0.00434805	-0.2074	0.0160653	-0.207726	-0.203271	0	0.067519	0.0546279	0.000769106	0	0	0	0.000151252	0.0852358
AC005291.2	0	0	0.0582828	0	0	0	0	0	0	0	0	0	0	0.0609725	-0.148923	-0.148923	-0.148923	-0.148923	-0.148923	0.0683903	8.15e-06	0	0	3.96e-05	4.14e-06	0	3.41e-05	3.22e-05
AC005303.1	0	0	0	0	0	0	0	0	0	0.028651	0	0	0.0238017	0	0.0820322	0	0	0.0902473	0	0	0	0	0	0	0	0	0	0
AC005304.1	-0.215006	-0.124277	-0.215006	-0.125769	-0.215006	0.0678247	-0.084755	-0.084755	0.0748975	-0.084755	-0.084755	-0.084755	-0.03078	-0.0452262	0.0123711	0.00138119	-0.16709	-0.16709	-0.16709	0	0	0.106962	0	0.17602	0	0.0927238	0	0
AC005304.2	0.0673888	0.0362666	0.0449915	0.0446795	-0.0212958	0.0329133	-0.0170231	0.0664635	0.00851001	0.17561	0.179575	0.111411	0.149908	0.258924	0.068176	0.213166	0.0631178	0.137151	0.0233254	-0.0385566	0.111226	0.171787	0.0327288	0.0359625	0.22242	0.0803582	0.135145	0.0612767
AC005304.3	0.0523071	-0.11974	0.108173	-0.11974	-0.00528986	0.148066	0	0	0	0.170148	0.0639933	0	0.181939	0.0280662	0.733992	0.47019	0.306836	0.13933	0.134411	-0.0545949	0.180946	0.112846	0.0808638	0.00934746	0.0764032	-0.0769315	0.0249183	-0.147249
AC005307.1	0.00132031	-0.0116339	0.00222413	-0.0116339	-0.0116339	0.0177663	0	0	0	0	0	0	0	0.0154479	0.00700233	-0.0299786	0.0847438	0.0224137	0.00597807	0	0	0.0206198	0.0200708	0	0.0245263	0	0	0.0148372
AC005323.1	0	0	0	0	0	0	0.047929	0.0526444	0	0	0	0	0	0	0	0	0	0	0	0	0	0	0	0	0	0	0.23201	0
AC005323.2	0	0	0	0	0	0	0	0	0	0	0	0	0.0405625	0.0515797	0	0	0	0	0	0	0	0	0	0	0	0	0	0
AC005324.1	-0.0593605	0.0045751	-0.0593605	-0.0593605	-0.0593605	0	0.0544485	0.0517983	0	0	0	0.0664132	0.0360492	0.0262562	0	0	3.12e-05	0	0	1.69e-05	0	0	0.0771086	0	0	0	0	0.0674268
AC005324.2	0	0	0	0	0	0	0	0	0	0	0	0	0	0	0	0	0	0	0	0	0	0	0	0	0	0	0	0
AC005324.3	-0.0122259	-0.0411156	-0.0126092	-0.0325153	-0.0586548	0.119892	0.0231736	0.0513834	0.0418065	0.0570025	0.047706	0.0628671	0.172729	0.231999	0.0860862	0.0468766	0.0599526	-0.0209554	0.0341942	0.0204846	0.0528443	0.133797	0.104115	0.087477	0.0998776	0.0843322	0.17034	0.0557559
AC005324.4	0.0102091	0.0429433	0.0220167	0.0585448	0.106566	0.091404	-0.013167	0.068892	0.0342949	0.0362904	0.0184714	0.09658	0.0692819	-0.056395	-0.0281424	0.192616	-0.0271518	-0.0271095	-0.0179065	-0.0489491	0.208422	0.0305899	0.145624	0.0203907	0.0825372	-0.0382806	0.0825334	0.0853646
AC005324.5	0	0	0	0.047543	0	0	0	0	0	0	0	0	0	0.0783407	-0.35727	-0.240744	-0.357382	-0.236854	-0.113014	0	0	0.0705355	0	0	0	0	0	0
AC005329.1	0.0656352	0.190883	0.0940158	0.118641	0.0324518	0.0989944	0.00968928	0.133449	0.0290151	0.0361639	0.0194219	-0.0322697	0.0233618	0.198815	0.148568	-0.185057	0.0476702	-0.0772655	-0.0258564	0.192662	0.12988	0.262301	0.237913	0.108477	0.196813	0.167122	0.399027	0.368304
AC005329.2	0.109403	0	0	0	0	0	0	0	0	0	0	0	0	0	0.000476921	-5.81e-05	-0.00048164	0.374095	-0.000342731	0	0	0	0	0	0	0	0	0
AC005329.3	0.0183014	0	0	0	0.0164383	0	0	0	0	0.0140189	0	0	0	0	-0.0692086	0.0305795	0.18105	-0.064492	0.0922229	0	0	0	0	0	0	0	0	0
AC005330.1	0	0	0	0	0.0184673	0	0	0	0	0	0	0	0.0145582	0	0.117517	0.00770705	0.0509695	0.0968664	0.20416	-0.00271226	-0.00271226	-0.00271226	0.01883	-0.00271226	-0.00271226	-0.00270517	-0.00271226	-0.00269459
AC005332.1	0.0230863	0.0227254	-0.0287944	0.0396232	0.0374388	0.173324	-0.00172973	0.309101	0.1944	0.0108429	-0.0180684	0.0172321	0.0102303	0.0137217	0.130294	-0.00444534	0.192076	0.0187522	-0.00255885	-0.0283279	-0.000922544	0.0160122	0.04306	0.016981	0.0422311	-0.00543808	-0.0168163	0.0329808
AC005332.3	0.00889115	0.0104632	0.0253706	0.0378837	-0.00594515	0.00900854	0	0.0137467	0.205656	0.0118488	0.00766113	0.138661	0.00616216	0.114847	0.0173769	-0.000704444	0.0824143	-0.000383639	0.00125377	6.52e-05	0.0179833	0.0200899	0.0303087	0.00828602	0.0367492	0.0446175	0.0480072	0.0418907
AC005332.4	0.205962	0.108387	0.179348	0.384071	-0.169714	0.608287	0.259273	0.330073	0.273553	0.332949	0.435104	0.526727	0.595912	0.430053	0.765575	0.465617	1.21913	0.68228	1.34132	0.289631	0.335856	0.869402	0.775793	0.774788	0.699795	1.25467	0.776593	0.642029
AC005332.5	0.357777	0.250043	0.204126	0.205942	0.182622	-0.349514	-0.125927	-0.0386062	-0.1756	-0.190993	-0.219259	-0.394028	-0.260088	-0.559507	-0.154463	0.0677784	0.350611	0.108766	0.109415	0.19198	0.46401	0.431203	0.591052	0.707777	0.919503	0.902551	1.00356	1.05455
AC005332.6	0.508087	0.421055	0.385176	0.470669	0.109491	0.122651	0.130285	0.248692	0.170729	0.194118	0.173524	0.188173	0.19925	0.237796	0.507299	0.635984	0.516687	0.468891	0.316052	-0.0165081	0.118233	0.182068	0.273091	0.337487	0.304865	0.417531	0.398122	0.0722078
AC005332.7	0.414979	0.496096	0.397154	0.551186	0.219575	0.370527	0.523017	0.509694	0.637207	0.752875	0.707412	0.480604	0.969452	0.790557	0.446438	0.688126	0.773579	0.632806	0.741411	0.381814	0.440194	0.711361	0.688816	0.767967	1.11383	1.07557	1.34996	0.565684
AC005332.8	0	0.21603	0	0	0.172001	-0.0428568	0.0743187	-0.0428568	-0.0428568	0.0557544	0.00543414	0.112676	-0.0428568	0.0383351	0	0	0	0.111456	0	-0.00663351	0.0855004	0.106933	-0.0435719	0.117328	0.0526417	0.0589141	-0.0435719	0.109844
AC005339.1	-0.187884	-0.417064	-0.610736	-0.116446	-0.431403	-0.327505	-0.108298	-0.234578	0.147046	-0.00190573	0.152706	-0.280122	0.0559639	0.14438	-0.255547	-0.254528	-0.259166	-0.25736	-0.254867	0.381145	-0.244012	-0.177047	-0.00617352	0.092327	0.643708	0.109081	0.219033	-0.179423
AC005342.1	-0.0376078	0.0467686	-0.0376105	0.00586083	0.0492022	-0.0120686	0.0394903	0.120105	-0.0418656	-0.00780104	0.127773	-0.0418656	0.0259657	0.161514	-0.199713	-0.0575233	-0.0655279	0.0505891	-0.239481	0.0360982	0.101681	0.259342	-3.98e-05	0.0815233	-3.98e-05	-3.98e-05	-3.98e-05	-3.98e-05
AC005342.2	0	0	0	0	0	0	0	0	0	0	0	0	0	0	0	0	0	0	0	0	0	0	0	0	0	0	0	0
AC005344.1	0	0	0	0	0	0	0	0	0	0	0	0	0	0	0.273117	0	0.304908	0	0	0	0	0	0	0	0	0	0	0
AC005355.1	-0.136457	-0.0531586	-0.237337	-0.0623831	-0.000744702	0.0633842	-0.0436138	0.129424	-0.109797	-0.027794	-0.0325919	-0.0898437	-0.164676	-0.11892	0.351979	0.19842	0.100742	0.402084	0.0881276	0.0263288	-0.168024	0.168474	-0.117188	-0.0122586	-0.0424748	-0.180911	-0.0565688	-0.0960985
AC005358.1	0	0	0	0	0	0	0	0	0	0	0	0	0	0	0	0	0	0	0	0	0	0	0	0	0	0	0	0
AC005358.2	1.37202e-05	0.0111468	0.000206011	0.00693952	-0.000179775	0.0183062	0.00502538	0	0	0	0	0	0.0458538	0.00287374	0.0339119	-0.0125707	0.0618898	0.00624939	0.0199946	0.00916005	0.0191472	0.00939993	0.000902808	0.00856152	0.0201293	0	3.79e-05	0.00695179
AC005363.2	0.350399	0.0802742	0.472568	0.183752	-0.698102	0.861113	0.486794	0.249599	1.19447	0.488082	0.492642	0.0490515	0.57737	0.357462	0.368524	0.370301	1.23625	1.57726	1.11006	-0.0327023	-0.133145	-0.366846	-0.682617	-0.00637183	-0.696777	-0.162155	-1.0041	-1.0041
AC005379.1	-0.224098	-0.345854	-0.345854	-0.104656	-0.22184	0.365463	0	0	0.101818	0.0895862	0.237802	0	0.576534	0	-0.184097	-0.366755	-0.591109	-0.084135	0.331277	0.273271	0	0.436144	0.335159	0.134492	0	0.414934	0.158249	0
AC005381.1	0	0	0	0	0	0	0	0.0523505	0	0	0	0.0308352	0.0256013	0	0.0881688	0	0	0	0	-0.160612	-0.20164	-0.20164	-0.20164	-0.20164	-0.20164	-0.20164	-0.20164	-0.20164
AC005383.1	-0.0932731	-0.0932731	-0.0932731	0.013421	-0.0932731	-0.0535888	-0.0535888	-0.0535888	-0.0535888	-0.0535888	0.00630096	-0.0535888	-0.0535888	-0.0535888	-0.112738	0.00502451	0.0318212	0.163911	-0.111428	0	0	0	0.17216	0.0714989	0.0913724	0.0679655	0	0
AC005387.1	0	0	0	0	0	0	0	0	0	0	0	0	0	0	-0.330418	-0.900068	-0.66499	-0.557024	-1.17021	0	0	0	0	0	0	0	0	0
AC005387.2	0	0	0	0	0	0	0	0	0	0	0	0	0	0	0.40523	-0.0281476	0.432912	0.692259	0.381193	0	0	0	0	0	0	0	0	0
AC005392.1	0.0217864	0.2479	0.15619	-0.0299502	-0.150241	0.0744432	0.223682	0.0572836	0.274634	0.368616	0.476331	0.712865	0.299382	0.404929	0.11055	0.19246	0.409378	0.49657	1.15586	-0.120419	-0.426633	-0.104013	-0.0218455	-0.357049	-0.123399	-0.131159	-0.433384	-0.428168
AC005392.2	0	0	0	0	0.146063	0	0	0	0	0	0	0.135181	0	0.0918712	0	0.252718	0	0	0	0	0	0	0	0	0	0	5.22e-05	0
AC005392.3	0	0.0732682	0	0	0	0	0	0	0	0	0.0711191	0.0660637	0.0448898	0	0.539161	0	0.353053	0	0.311416	-0.068928	-0.068928	-0.068928	-0.068928	-0.068928	-0.068928	0.0919275	0.0240289	-0.068928
AC005393.1	0.231883	0.0870588	-0.0448513	-0.0399932	-0.0905657	0.0335604	0.0937626	0.0570594	0.388489	0.434574	0.455373	0.398325	0.37946	0.348501	0.456291	-0.32567	0.606247	0.0744867	0.130892	-0.0882993	-0.0736381	-0.0729944	-0.306229	-0.0457414	-0.0970523	0.163722	0.16629	0.00770844
AC005394.1	0	0	0	0	0	0	0	0	0	0	0	0	0	0	0	0	0	0	0	0.0151422	0	0	0	0	0	0	0	0
AC005410.2	0.0910718	-0.0631908	0.201184	0.235729	0.0950032	-0.256545	-0.136901	0.00556975	0.0307542	-0.0670498	-0.0098324	-0.256545	-0.153837	0.00111789	-0.292088	-0.305367	0.0578298	-0.301913	-0.116363	-0.222263	-0.222151	0.114431	-0.129114	-0.0596212	-0.0785301	0.0222838	-0.114635	0.158456
AC005476.2	-0.0633016	0.360771	-0.05022	0.344817	0.186351	0.184328	0.494908	0.175861	0.484459	-0.31382	-0.366212	1.11034	0.323782	0.316451	-0.123167	-0.295053	0.381136	-0.308473	0.204904	0.194199	0.209346	-0.00829767	0.377306	-0.0620347	0.452531	-0.176529	0.192099	-0.362646
AC005479.1	0.00868349	-0.0393521	0.330771	0.07851	-0.0373076	0.109377	-0.150833	-0.262417	0.0593135	0.0243363	0.0979277	-0.0712514	-0.681906	0.292683	-0.16684	0.599016	0.184746	-0.362736	-0.15115	-0.325658	-0.15825	-0.341128	0.156296	0.227988	0.22005	0.305301	0.692666	-0.00976258
AC005479.2	-0.236288	-0.270091	-0.327915	-0.263916	-0.247399	0.0419002	0.179521	0.126033	-0.130023	-0.156211	-0.138904	0.0412759	-0.333891	-0.255271	-0.282621	-0.483272	-0.588789	-0.786636	-0.10094	-0.254231	-0.103457	-0.15573	-0.268582	0.014406	0.111488	0.42076	0.853541	0.259044
AC005480.1	0.031851	0.0449146	0.0194281	0.268922	0.16171	-0.125015	-0.0915056	-0.0982708	0.0411053	-0.110306	-0.116926	0.14716	-0.102778	-0.105227	-0.519769	-0.38185	-0.679865	-0.264521	-0.437691	0.167414	0.0326993	0.0364549	0.0756163	0.00846297	0.197282	0.217159	0.0696946	0.0164626
AC005481.1	0	0	0	0	0	0	0	0	0	0	0	0	0	0	-0.0187712	-0.0027104	-0.000811927	-0.0187712	-0.0187712	0	0	0	0	0	0	0	0	0
AC005482.1	0	0	0	0	0	0	0	0	0	0	0	0	0	0	0	0	0	0	0	0	0	0	0	0	0	0	0	0
AC005486.1	0	0.275695	0	0	0	0.879931	0.461732	0.262485	0	0.352115	0.91271	0.56467	0.626297	0	0.477049	0	0.484499	1.12021	0.467403	0.34131	1.0472	0	0.594538	0.272309	0.443906	0	0	0
AC005487.1	0	0	0	0	0	-0.0431993	-0.0431993	-0.00700926	-0.0104675	-0.0114748	-0.0431993	-0.0431993	-0.0431993	-0.0143664	0	0	0.110791	0	0	-0.0394044	-0.0394044	-0.0394044	-0.0394044	-0.0394044	-0.0394044	-0.0394044	0.0645938	-0.0394044
AC005498.1	0	0	0.262955	0.197116	0.0714776	0.318852	0.0636352	0.0721975	0.067411	0.280082	0.143668	0	0.227034	0.201225	0.16644	0	0.17321	0.157811	0	-0.160306	-0.160306	-0.160306	-0.160306	-0.160306	-0.0486054	-0.0861242	-0.0533351	-0.0888123
AC005498.2	-0.150462	-0.0438163	-0.077501	-0.0138963	-0.213121	0.246924	0.0961248	0.112796	0.57772	0.0968013	0.231329	0.885247	0.96819	1.01791	0.372131	0.289118	0.25731	0.622019	0.742717	0.0762182	-0.314292	-0.201115	0.0502095	0.202676	0.249452	0.322171	-0.381581	0.245225
AC005498.3	-0.0412162	-0.0151165	0.0045869	0.0373621	-0.0596564	0.0164779	0.02019	-0.0038137	-0.0321273	-0.10048	-0.107874	-0.0850992	0.0438662	0.0292954	0.125793	0.115626	0.160015	0.107698	0.332379	0.052785	0.0512807	0.22755	0.0411248	0.123541	0.192069	0.136787	0.100239	0.0490108
AC005515.2	0	0	0	0	0	0	0	0	0	0	0	0	0	0	0	0	0	0	0	0	0	0	0	0	0	0	0	0
AC005520.1	0.0375072	-0.0144054	-0.0389522	0.0281362	-0.0437749	0.175893	0.0113089	0.0257758	0.0668938	0.0809634	0.0606335	0.0479198	0.2053	0.246373	-0.24217	-0.169435	-0.377653	-0.263177	-0.112432	-0.149168	0.00307349	-0.00592082	-0.0671501	-0.0440701	0.226607	0.0989728	0.0915228	-0.0815633
AC005520.2	-0.102211	-0.12428	-0.126139	0.255156	0.0915402	0.343759	-0.140878	0.159391	0.338017	0.373828	0.426854	0.729721	0.958914	0.873032	-0.0170642	0.313096	0.155139	0.327877	0.677988	-0.0636541	0.423775	0.448154	0.290374	0.205551	0.59272	0.273875	1.3437	0.932878
AC005520.5	0	0	0	0	0	-0.883514	-0.883514	-0.883514	-0.883514	-0.883514	-0.883514	-0.883514	-0.883514	-0.883514	0	0	0	0	0.855909	0	0.982072	0	0.515138	0	0.675435	0	0.506581	0
AC005522.1	0	0	0	0	0	0	0	0	0	0	0	0	0	0	0	0	0	0	0	0	0	0	0	0	0	0	0	0
AC005523.1	-0.145189	-0.411286	-0.489728	-0.495749	-0.0144093	0.265279	0.138252	0.410299	0.0626379	-0.0278931	0.0806512	0.00398345	0.221514	0.126782	0.0170828	0.0155972	0.0410514	0.151375	-0.15918	-0.0188903	0.19509	-0.234631	-0.234631	-0.234631	-0.234631	-0.135878	-0.108518	-0.234631
AC005523.2	0.236962	-0.0561643	-0.0391526	-0.0167616	-0.0178004	0.127473	0.0937772	-0.00935048	0.018917	-0.0099036	0.0140516	0.0319842	-0.00919832	-0.0330259	0.00437493	0.244775	0.0213866	7.5e-05	-0.00431334	0.0231023	0.0375788	0.0148121	0.0966381	0.048701	-0.0174493	-0.00454087	0.0386825	0.0910915
AC005534.1	0	0	0	0	0	0.0125708	-0.0336336	-0.0336336	0.000635793	-0.00507791	0.103189	0.00588305	-0.00702417	0.224719	0	0	0.097187	0.176674	0.0845905	0.0962036	0.055801	0	0.0400409	0	0	0.0421848	0	0.0365206
AC005537.1	-0.016471	-0.00835336	-0.0207165	-0.0605786	-0.0596742	-0.00394914	-0.0188724	0.000283029	0.0667879	-0.0188724	0.0258765	0.0461359	0.0476165	3.74686	-0.631938	-0.500705	-0.385859	-0.0356954	0.0118576	-0.0248244	-0.0444331	-0.0438561	0.139318	-0.0210857	-0.0444331	0.0451948	0.303867	0.0523075
AC005538.1	0	0	0	0	0	0	0	0	0	0	0	0	0	0	0	0	0	0	0	0	0	0	0	0	0	0	0	0
AC005540.1	0.172789	0.0238948	-0.0140369	0.140019	-0.0257634	0.173828	0.0818184	0.149711	-0.144496	0.0264645	0.0280063	0.0890448	0.14056	-0.00405439	-0.0025068	-0.0336797	0.130672	0.44055	0.231099	-0.359067	-0.20558	-0.064321	-0.222181	-0.151862	-0.307297	-0.200769	-0.350444	-0.0719557
AC005544.1	0.0669691	0	0	0	0	0	0	0	0	0	0	0	0	0	0	0	0	0	0	0	0	0	0	0	0	0	0	0
AC005544.2	0	0	0	0	0	0	0	0	0	0	0	0	0	0	0	0	0	0	0	0	0	0	0	0	0	0	0	0
AC005546.1	0.331095	0.097076	0.109762	0.0160895	0.238722	0.0971548	0.202343	0.0268649	0.458462	0.105629	-0.0138641	0.187613	-0.122771	-0.186547	-0.47524	0.399314	0.948515	0.368792	0.0709135	0.493507	-0.0672403	0.407865	0.157678	0.42629	0.0422862	0.446399	-0.0461378	-0.096882
AC005549.1	0	0	0	0	0	0	0	0	0	0	0	0	0	0	0	0	0	0	0	0	0	0	0	0	0	0	0	0
AC005550.1	0	0	0	0	0	0	0	0	0	0	0	0	0	0	0	0	0	0	0	0	0	0	0	0	0	0	0	0
AC005550.2	0	0	0	0	0	0	0	0	0	0	0	0	0	0	0	0	0	0	0	0	0	0	0	0	0	0	0	0
AC005551.1	0	0	0	0	0	0	0	0	0	0	0	0	0.0405625	0	0	0	0	0	0	0	0	0	0	0	0	0	0	0
AC005552.1	0	0	0	0	0	0	0	0	0	0	0	0	0	0	0	0	0	0	0	0	0	0	0	0	0	0	0	0
AC005580.1	-0.0520903	-0.0520903	-0.0520903	-0.0520903	-0.0520903	0	0	0	0	0	0	0	0	0	0	0	0	0	0	0	0	0	0	0	0	0	0	0
AC005586.1	-0.149519	0.0831905	-0.00654504	0.0348535	-0.0561886	0.594009	0.447212	0.259655	0.916686	0.279896	0.350263	0.102646	0.33133	0.342882	-0.556653	-0.257347	-1.18439	0.0832131	-0.475083	0.000665803	0.11362	0.106561	0.18931	-0.00983083	0.110055	0.197628	0.125742	0.0826418
AC005592.1	0.0409486	0.00229981	0.0151413	0.0178363	0.00185558	-0.0249764	-0.000232846	-0.0110014	0.0361495	0.0084125	-0.0105776	0.00632194	0.0465982	0.00168883	0.147811	0.0440041	0.0203544	-0.0565808	0.173609	-0.0147834	-0.036812	-0.0411621	0.0241348	0.00913629	-0.00506511	0.0671502	0.0657082	0.136131
AC005597.1	0	0	0	0	0	0	0	0	0	0	0	0	0	0	0	0	0	0	0	0	0	0	0	0	0	0	0	0
AC005606.1	0	0.0683347	0	0.068414	0.122833	0	0.0560179	0.0631416	0	0	0	0	0	0	0.151926	0.00148068	0.00122001	0.15425	0.138732	0	0	0	0	0	0	0	0.0806797	0
AC005606.2	0.0487922	0	0	0.0510449	0	0	0	0.0565254	0.0506973	0	0	0	0	0	0.000429659	-0.000601691	-0.00111093	0.00315319	-0.000873248	0	0	0.0752854	0.0514452	0	0	0	0	0
AC005609.1	0	0	0	0	0	0	0	0	0	0	0	0	0	0	0	0	0.113787	0.00147307	0	0	0	0	0	0	0	0	0	0
AC005609.2	0	0	0	0	0	0	0	0	0	0	0	0	0	0	0	0	0	0	0	0	0	0	0	0	0	0	0	0
AC005609.3	0	0	0	0	0	0	0	0	0	0	0	0.0694888	0	0.027506	0	0	0	0.00136828	0	0	0	0	0	0	0	0	0	0
AC005609.4	0	0	0	0	0	0	0	0	0	0	0	0	0	0.0393609	0	0	0	0	0	0	0	0	0	0	0	0	0	0
AC005609.5	0	0	0	0.0597208	0	0	0	0	0	0	0	0.0673823	0	0.0323083	0	0.0213488	0	0.0186529	0	0	0	0	0	0	0	0.0699134	0.170199	0
AC005614.1	0.00337734	0.0329168	-0.04481	0.00412107	-0.0249589	-0.0504056	-0.0279245	0.00105002	-0.0276454	-0.0361848	-0.0458626	-0.0170029	-0.0515519	-0.0138885	0.0529324	-0.00497676	0.00738505	0.0946769	-0.0420404	-0.0077176	0.0190826	0.0116341	0.0735378	0.0119791	-0.017964	-0.0213589	0.0388814	0.0133012
AC005616.1	0.0135296	0.00587487	-0.0424971	-0.0362873	-0.042421	0.0897597	0	0	0.0949249	0	0	0	0.0716142	0	-0.166015	-0.0705801	-0.278513	-0.277495	-0.266379	0.0052993	-0.0944248	0.139432	0.0654939	-0.0943021	-0.0944248	-0.0944248	0.1099	-0.0944248
AC005618.1	0.326234	0.159435	0.337162	0.181031	0.119895	0.0281772	0.0851417	0.251984	0.148709	0.26822	0.18012	0.136436	0.651963	0.313729	0.259944	0.355536	0.401336	0.427129	0.518653	0.0519805	0.10964	0.38689	0.290074	0.213139	0.440062	0.488852	0.821547	0.361397
AC005618.2	-0.0633276	-0.0572499	-0.130786	-0.130786	-0.130786	-0.435757	-0.196593	-0.435757	-0.435757	-0.332064	-0.364392	-0.435757	-0.381939	-0.350022	-0.586499	-0.438038	-0.130064	-0.558583	-0.570649	0.0551017	-0.181865	-0.0298052	-0.194787	-0.0371664	-0.289539	-0.204105	0.0919307	-0.206553
AC005618.3	0.0585713	-0.0976557	-0.0976557	-0.0478763	0.00554242	-0.101407	-0.0529549	-0.101407	-0.0587325	-0.101407	-0.101407	-0.101407	-0.101407	-0.101407	-0.0148573	-0.00983899	-0.00319901	-0.0185853	-0.0147515	0.0707208	0.0688356	-0.0512278	0.117786	-0.0512278	0.114568	0.0701301	0.0191321	0.0693512
AC005625.1	0	0	0	0	0	0.120692	0	0.0603251	0	0	0	0	0	0.0457332	0.16315	0.137782	0.170466	0	0.163217	0	0	0	0	0	0	0	0	0
AC005632.4	0	0.0775292	0	0	0	0	0	0	0.145329	0	0	0	0	0	0	0	0.192209	0	0	0	0	0	0	0	0	0	0	0
AC005670.1	-0.323007	-0.100489	-0.333722	-0.42139	-0.420494	-0.0610333	-0.543782	-0.0710458	-0.0463312	-0.349831	-0.453103	-0.137332	-0.249189	-0.261868	-0.391863	-0.599701	-0.599701	0.127204	-0.599701	0.317457	-0.195582	-0.0539421	-0.128551	-0.431033	-0.287372	-0.325747	-0.0682556	-0.325706
AC005670.2	0.177835	-0.0213088	-0.0971183	-0.330223	-0.0558759	0.389522	0.335985	0.105558	0.0666887	0.213195	0.11966	-0.582256	-0.898721	-1.28393	0.0965304	0.172464	0.493463	0.00618341	0.19568	0.370642	0.290303	0.185448	0.0762141	-0.052368	0.282526	-0.282437	-0.271439	-0.246934
AC005674.1	0	0	0	0	0	0	0	0	0	0	0	0	0	0	0	0	0	0	0	0	0	0	0	0	0	0	0	0
AC005692.1	0	0	0	0	0	0	0	0	0	0	0	0	0	0	0	0	0.0453825	0	0	0	0	0	0	0	0	0	0	0
AC005692.2	0	0	0	0	0	0	0.0434654	0	0	0	0	0	0	0	0.107266	0.238791	0.252429	0	0	0.0957957	0	0	0	0	0	0	0	0
AC005695.1	-0.00286246	-0.00286246	-0.00286246	-0.00286246	-0.00286246	0	0	0	0	0.00284467	0.00381687	0	0.00288361	0.00485626	0.010259	7.2e-05	-7.83e-06	-7.83e-06	0.00172805	-0.000804434	-0.000804434	-0.000804434	-0.000804434	0.00435414	-0.000804434	0.00320989	-0.000798758	-0.000799312
AC005695.2	0	0	0	0	0	0	0	0	0	0	0	0	0	0	0	0	0	0	0	0	0	0	0	0	0	0	0	0
AC005695.3	0	0.240346	0	0	0	0	0.199245	0	0	0.309971	0	1.18825	0	0	0	0	0	0.403245	0	0.253026	0	0	0	0	0	0	0	0
AC005696.1	0.102708	-0.0349403	-0.110197	-0.101933	-0.040421	-0.784022	-0.9171	-0.911365	-0.550083	-0.893946	-0.976348	-0.496741	-0.899497	-0.939368	0.344789	0.124159	-0.0406402	-0.0482292	0.0691527	-0.452583	-0.454457	-0.172018	-0.471957	-0.501142	-0.310493	-0.24739	-0.197231	-0.312623
AC005696.2	-0.0606341	-0.113592	-0.158714	-0.0724398	-0.113704	-0.185465	7.21e-05	-0.0161889	-0.143801	-0.209434	-0.199044	0.0790981	-0.210712	-0.243709	-0.171991	-0.284109	-0.0450376	-0.0844813	-0.284476	0.0743975	0.346501	-0.00875954	-0.0378382	-0.101149	0.0561141	0.167039	0.052552	-0.0378111
AC005696.3	0.886436	0.677964	0.588759	0.455587	0.739099	0.289885	-0.558425	-0.0212625	-0.428928	-0.616154	-0.696676	-0.690401	-0.798044	-1.02269	-0.73913	-1.38674	-1.92924	-1.32522	-1.51265	-0.103211	-0.095671	0.536863	0.0250886	0.108557	-0.0459875	-0.163082	-0.068846	-0.924775
AC005696.4	0.042959	0.00030075	0.00114855	-3.75581e-06	-3.75581e-06	0.00831574	0.00620675	0	0	0	0	0	0	0.0216884	0.00161089	0.0182914	0.0230728	0.0224066	0.0344873	0.0154169	-0.000727559	-0.000789878	0.00873041	0.0143955	-0.000661705	0.0013807	-0.000758279	0.0166917
AC005697.1	-0.000993155	-0.000758167	0.000863154	0.000787738	-0.00245365	0	0	0	0	0	0	0	0.118129	0	-0.196695	-0.204502	-0.197266	-0.207857	-0.196629	0.0235028	-0.0737179	-0.0726645	0.030704	-0.0769814	-0.0655142	-0.0789589	-0.0724305	-0.0768405
AC005697.2	-0.00916402	-0.00925324	-5.96336e-05	-0.000664758	-0.00925324	0	0.106626	0.0097678	0	0.00808373	0	0	0.0080551	0	0.0865895	0.000864664	0.0126053	0.0807042	-0.000301377	-0.0692556	-0.0692556	-0.0692556	-0.0427363	-0.0638405	-0.0692556	-0.0576588	-0.0535529	-0.0692555
AC005699.1	0	0	0	0	0	0	0	0	0	0	0	0	0.0887046	0.109469	0	0	0	0	0	0	0	0	0	0	0	0	0	0
AC005702.1	-0.0117233	-0.264772	0.157588	-0.00254479	-0.210114	-0.191999	-0.625226	-0.629476	-0.3523	-0.511154	-0.611319	-0.787284	-0.637653	-0.727932	-0.363036	0.036683	-0.36347	-0.354338	-0.363507	0.150197	0.000273236	0.00544773	0.00625588	0.0612686	0.196822	0.194162	0.00399726	3.26e-06
AC005703.1	0	0	0	0	0	0	0	0	0	0	0	0	0	0	0	0	0.0368001	0	0.0315325	0	0	0	0	0	0	0	0	0
AC005703.2	0	0	0	0	0	0	0	0	0	0	0	0	0.0781537	0	0	0	0	0	0	0	0	0	0	0	0	0	0	0
AC005703.3	-0.000101129	-0.00437784	0.0069292	-0.103985	-0.103985	0.29673	0.185015	0.295355	0.0812074	0.0710124	0.204748	0.206345	0.477959	1.0873	0	0	0.369495	0	0	-0.100141	-0.084787	-0.0770744	-0.131775	-0.296017	-0.097956	-0.296017	-0.166832	-0.296017
AC005703.4	-0.046843	0.073977	-0.046843	-0.046843	-0.046843	0	0	0	0.0985509	0.0431915	0.259915	0.0626321	0	0.361117	0	0.125957	0.135085	0	0.138146	0.0450154	0.210193	0.146159	0	0	0.299981	0.185792	0	0.108102
AC005722.2	-1.84854e-05	-0.00603054	0.000225301	-0.00603054	-0.00603054	0	0	0	0.00487646	0	0.00619371	0.00683525	0.00440447	0.0114727	-0.0288514	-0.0633187	-0.0633187	-0.0466928	-0.0633187	0	0.0257062	0.00906508	0.0276641	0	0	0	0	0.00647735
AC005722.3	0	0	0	0	0	0	0	0	0	0	0	0	0	0	0	0	0	0	0	0	0	0	0	0	0	0	0	0
AC005725.1	0.258058	0.149878	0.0661432	0.070217	0.0964408	-0.200201	-0.0290889	0.0138833	-0.0477122	-0.145684	-0.16417	-0.0873105	0.0995878	-0.226139	-0.016308	0.146678	0.00624868	-0.128213	0.181494	-0.0541158	0.0157882	0.0714435	0.179413	0.018605	-0.00265664	0.0096939	0.127168	0.09766
AC005726.1	0.129215	-0.0662808	-0.193734	-0.0675343	-0.142308	-0.124367	-0.0749451	-0.352547	-0.188821	-0.120555	-0.0853805	-0.404824	-0.355701	-0.237482	-0.419075	-0.156169	-0.278092	-0.398657	-0.22461	0.145518	0.441031	0.149165	0.257241	0.156004	0.120385	0.149191	-0.0622262	-0.392609
AC005726.2	-0.0864189	-0.105539	-0.0885315	-0.0255256	-0.00589228	-0.0162484	-0.000642616	0.0017359	0.0724554	-0.00284949	0.0201171	0.100626	-0.0162484	-0.00755103	0.503782	0.178543	-0.0598971	0.529284	0.0834116	0.0737029	0.0749835	0.107446	0.0864941	-0.0539206	0.0727536	-0.0523811	-0.0499125	-0.0212932
AC005726.4	-0.253631	-0.253631	-0.253631	-0.253631	-0.097477	0	0	0.152112	0	0	0	0	0	0	-2.85e-05	-1.68e-05	-5.2e-06	-5.8e-05	-5.8e-05	0	0	0	0	0	0.274616	0.165722	0	0
AC005726.5	0.00708386	0.0673692	-0.0358554	0.0270707	0.0262586	0.0728434	-0.00284847	0.00202661	-0.025579	0.0924354	0.057985	-0.042968	0.0236536	-0.0114862	0.135697	0.043852	-0.00554669	-0.067971	0.145553	0.0383854	0.0235395	0.106647	0.0596227	0.103637	0.102474	0.0527645	-0.0646733	0.0314316
AC005730.2	-0.0161904	0.0622068	-0.0161904	0.0378795	-0.0161904	0.338306	0.0183989	0.0203647	0.019099	0.0310355	0	0.499525	0.0453711	0.035652	0	0	0	0	0.104122	0.00519554	-0.018952	-0.018952	-0.018952	-0.018952	-0.018952	0.00579398	-0.018952	0.00156361
AC005736.3	0	0	0	0	0	0	0	0	0	0	0	0	0	0.194418	0	0	0	0	0	0	0	0	0	0	0	0	0	0
AC005740.3	0	0	0	0.119882	0	0	0.105207	0	0	0	0	0.107228	0	0	-0.785386	-0.57525	-0.264033	-0.549058	-0.306699	0	0	0	0	0	0	0	0	0
AC005740.4	-0.0213327	0.0030031	0.00371925	0.0979208	0.0281747	0.044982	-0.00334009	-0.0500903	0.0183889	-0.0290516	-0.00689533	0.064077	0.215694	0.235788	-0.118805	0.0563054	-0.046417	-0.118805	0.15701	-0.013813	-0.0158932	-0.0250505	-0.0653099	-0.0293113	-0.0512541	-0.0328476	0.0138175	-0.0322844
AC005746.2	0.160102	-0.057988	0.176409	0.684453	0.701618	-0.274248	-0.660391	-0.0262233	-0.704675	-0.227189	-0.197046	-0.0944853	-0.312167	-0.355407	0.988732	0.939391	1.4437	0.371545	0.145024	0.0126717	0.236097	0.466954	0.350793	0.687291	0.903302	1.06411	0.733412	0.0689151
AC005746.3	0.0899481	0.122599	-0.0716329	0.59879	0.0839125	0.0705764	-0.00653637	0.00483768	-0.00117479	0.220462	0.145081	-0.0893608	-0.0893608	0.242628	0.119842	-0.366405	-0.0757417	-0.556252	-0.364093	0	0	0.379903	0.387512	0.221124	0	0.29037	0	0
AC005753.1	0	0	0	0	0	0	0	0	0	0	0	0	0	0	0	0	0	0	0	0	0	0	0	0	0	0	0	0
AC005757.1	0.0696385	0	0	0	0	0	0	0	0	0	0	0	0	0	0.145613	0.000274133	0.159991	0.000287338	0	0	0	0	0	0	0.248912	0	0	0
AC005759.1	0.2254	0.277852	0.331143	0.0736421	0.262481	0.246427	-0.236195	-0.228108	0.143296	0.0763081	0.224342	0.421706	2.54148	1.59899	0.441645	0.389374	1.17741	1.0389	1.09581	-0.496367	-0.169177	0.306949	0.543364	0.658275	0.623566	0.664431	0.139395	0.451011
AC005772.1	0	0	0	0	0	0	0	0	0	0	0	0	0	0	0	0	0	0	0	0	0	0	0	0	0	0	0	0
AC005774.1	0	0	0	0	0	0	0	0	0	0	0	0	0	0	0	0	0	0	0	0	0	0	0	0	0	0	0	0
AC005775.1	0.0855584	-0.0523569	-0.0614539	-0.0484319	-0.00514529	0.0111244	-0.111591	-0.0255757	0.0964865	-0.0234673	-0.029549	0.26973	0.147057	0.0242773	0.155243	0.154671	0.238155	0.331682	0.359471	0.0332478	0.18925	-0.103993	0.0806322	-0.00632112	-0.00713889	0.23119	0.406691	0.0294367
AC005776.2	0.0783208	-0.0217038	0.0254582	0.0106405	-0.0105684	-0.00454959	0.0649504	0.0358687	0.0551919	0.0384156	0.0476165	-0.00153934	0.0462509	0.0966871	-0.285017	-0.44236	-0.116873	-0.171615	-0.168081	-0.019233	0.0679798	0.00346841	0.049448	0.059131	0.0644658	0.0580792	-0.0301784	0.01163
AC005779.1	-0.092377	-0.092377	0.016441	0.0696315	-0.092377	-0.109544	-0.0591774	-0.109544	-0.0245668	-0.0700339	0.0873008	0.0291958	-0.0265794	0.631305	0.259118	0.0441817	0.0248068	0.335133	0.01564	0.0284063	0.0296287	-0.053243	-0.053243	0.155844	0.0622743	0.0136433	0.254323	0.137077
AC005779.2	-0.134978	-0.135032	-0.134998	-0.135032	-0.134966	-0.519464	-0.519464	-0.519464	-0.519464	-0.478826	-0.519464	0.0402342	-0.480315	-0.427785	0.146933	-0.109361	-0.109477	0.0187893	0.232252	-9.79e-05	-0.000137843	-0.000137843	-3.46e-05	-7.06e-05	-0.000137843	-1.98e-06	0.362283	0.0629801
AC005786.2	-0.10601	-0.10601	-0.10601	-0.10601	-0.10601	0	0	0	0	0	0	0.0950585	0	0.118817	0.228387	-3.47e-06	-3.47e-06	0.216105	2.39e-05	-2.28e-05	-1.86e-06	-2.28e-05	-2.95e-06	-2.28e-05	7.14e-05	-2.28e-05	-2.28e-05	-2.28e-05
AC005786.3	0.125301	0.248387	-0.0389889	0.0488791	0.103768	0.185028	0.0421027	0.0955508	0.0895775	-0.00959613	0.099264	0.00812536	0.0213779	0.137342	-0.00128592	-0.00149646	-0.000157252	0.13765	0.119453	-0.00506445	0.179003	0.120944	-0.180394	-0.0439625	-0.0435691	-0.166117	-0.0676147	-0.228935
AC005789.1	0	0	0	0	0	0	0	0	0	0	0	0	0	0	0	0	0	0.288984	0.000179694	0	0	0.176135	0	0	0	0	0	0
AC005790.1	0.138558	0.219097	-0.282664	-0.0808853	-0.0547026	-0.065673	0.00538146	-0.225873	0.082944	-0.463913	-0.380188	-0.366295	-0.842144	-1.26926	-0.772127	-0.52082	-0.200123	-0.129109	-0.671751	0.351828	0.0307769	0.667864	0.799443	0.721231	0.84028	0.371035	0.139619	0.783387
AC005808.1	0	0	0	0	0	0	0	0	0	0	0	0	0	0	0	0	0.226874	0	0	0	0	0	0	0	0	0	0	0
AC005821.1	-0.185403	-0.0948315	-0.138353	-0.114351	-0.133475	0.0942352	0.176426	0.0968578	0.21495	0.00598696	0.0636248	0.0795832	0.314288	0.314939	0.0999008	0.194527	0.10803	0.444337	0.162021	0.134888	0.079828	-0.0218965	0.237618	0.165251	0.0505328	0.0599109	0.128418	0.0369982
AC005823.1	0	0	0	0	0	0	0.0446724	0	0	0	0.0492134	0	2.98026	6.35671	0	0.310336	0	0	0	0	0	0.0618118	0.0664659	0	0	0.0579356	0.065191	0
AC005823.2	0	0	0	0	0	0	0	0	0	0	0	0	0	0	0.0961743	0	0	0	0	0	0	0	0	0	0	0	0	0
AC005828.1	0	0	0	0	0	0	0	0	0	0	0	0	0	0	0.226856	0.159798	0.402218	0	0	0	0	0	0	0	0	0	0	0
AC005828.2	0	0	0	0	0	0	0	0	0	0	0	0	0	0	0	0	0	0	0.130816	0	0	0	0	0	0	0	0	0
AC005828.3	0	0	0	0	0	0	0	0	0	0	0	0	0	0	-0.00277493	-0.00277493	0.130812	0.0111827	-0.00277493	0	0	0	0	0	0	0	0	0
AC005828.4	0	0	0.108756	0.110315	0	-0.051886	-0.051886	-0.051886	-0.051886	-0.0101602	-0.051886	-0.051886	-0.051886	-0.051886	0.118364	0	0	0	0	0	0	0	0	0	0	0	0	0.0627914
AC005828.5	0	0	0	0	0	0	0.0997003	0	0	0	0	0	0	0	0	0	0	0	0	0	0	0	0	0	0	0	0	0
AC005832.4	-0.956196	-0.472248	-1.37972	-0.284421	-1.23404	-1.52402	-1.17244	-0.734805	-0.463312	0.0473973	-0.0358034	-0.183087	-0.581103	-0.613475	-0.623405	-0.576423	-0.359853	-0.21051	-0.710776	1.04496	-0.17719	0.121899	0.0198772	-0.423561	0.503854	0.38239	-0.216724	-0.513746
AC005833.1	0.0279195	0.0155135	-0.00441989	-0.00448906	-0.00448906	0	0	0	0	0.0150041	0	0	0	0	-0.146008	-0.0462343	-0.0554527	-0.103499	-0.151302	0	0	0	0	0	0.0176417	0	0	0
AC005833.2	-0.227727	-0.0219654	-0.0353243	-0.410501	0.212839	0.0140769	-0.450256	-0.58188	-0.1733	-0.332893	-0.357355	-1.01065	-1.10021	-1.35799	0.129902	0.201999	-0.258295	0.161882	-0.559228	-0.102124	-0.0353317	-0.255291	-0.235171	-0.168423	-0.284198	-0.451189	-0.747254	-0.488885
AC005833.3	0	0	0	0	0	0	0	0	0	0.0555562	0	0	0	0	0	0	0.2967	0	0	0	0	0	0	0	0	0	0	0
AC005837.1	-0.0382828	-0.00538469	0.00208847	-0.040269	-0.027674	-0.107291	-0.284376	-0.176644	-0.242908	-0.252812	-0.283647	-0.345698	-0.310895	-0.311624	-0.0336605	0.165186	0.206435	0.162481	0.185459	0.151257	0.0547426	-8.76e-05	0.115421	0.0827122	-0.219351	-0.2	-0.175643	-0.171704
AC005837.2	0.000540077	-0.00113179	-0.000318964	-0.000451465	0.00124718	-0.0185834	-0.0637588	-0.0637588	-0.0637588	-0.0637588	-0.0637588	0.0525934	-0.0637588	-0.0637588	0.00377854	0.00371052	0.00365963	0.00289372	0.00447658	0.00041337	0.11636	0.000905185	0.000696765	0.120572	0.00613322	0.000732329	0.00451741	-0.000250837
AC005837.3	0.865552	0.681819	0.28993	0.420088	0.378006	0.58381	0.540333	-0.106766	-0.29864	-0.0789566	-0.0547718	0.0740668	0.183667	-0.0372864	-1.72896	-0.596962	-1.51621	-1.71108	-0.911211	-0.429641	0.0514741	0.0350799	0.049767	0.107356	-1.10154	-0.578963	-0.24409	-0.765421
AC005838.2	0.272075	0.00656011	-0.127062	0.24506	0.00521293	0.186274	-0.375561	-0.35717	-0.160325	-0.171027	-0.00499597	-0.169276	-0.0848144	-0.493994	-0.669296	-0.52844	-0.557839	-0.355515	-0.482127	-0.0638775	0.0569858	0.0178282	-0.23042	0.18368	0.0108522	0.0618219	-0.441053	-0.282479
AC005840.2	-0.0683674	0.00607683	-0.0765582	-0.080613	-0.156988	0.088386	-0.0400885	-0.0841517	-0.108115	-0.0722634	-0.076223	-0.19451	-0.172784	-0.182825	-0.208326	-0.131806	-0.0564152	-0.28875	-0.286913	0.0788925	0.208452	0.288159	0.203563	0.215527	0.100596	0.133106	0.356798	0.106786
AC005840.4	0.103766	-0.0537106	-0.052907	-0.0628797	-0.14799	0.178372	0.179079	0.133815	0.234455	0.150925	0.114794	0.0468054	0.135716	0.427144	-0.0412416	0.0185937	0.151877	0.164184	-0.348256	-0.0758387	-0.0997946	0.214587	0.114159	0.14373	0.354036	0.0610986	-0.0528578	0.0329737
AC005841.1	-0.105478	-0.271646	-0.271646	-0.103174	-0.104319	-0.162295	-0.162295	-0.162295	-0.162295	-0.0539029	-0.00773151	0.191596	-0.0682875	-0.092431	-0.401866	-0.0315637	-0.0329575	-0.0628066	-0.402847	0.143353	0.281526	-0.158682	-0.158682	-0.158682	-0.158682	-0.158682	-0.158682	0.0279584
AC005842.1	0	0.0384533	0	0	0	0	0	0.0408631	0	0	0	0	0.0265591	0.0192048	-0.104882	-0.104882	-0.104882	-0.0072907	-0.104882	0	0	0	0	0	0	0	0.0534228	0
AC005845.1	0.210236	0.140531	0.0205414	0.197923	0.197577	-0.158592	-0.046266	0.0716649	0.0949082	-0.12781	-0.0772937	-0.0841934	0.212959	0.123873	0.00160955	0.220826	0.38587	0.00259674	0.0983043	-0.0631958	0.0543205	-0.127737	-0.127737	-0.0807398	-0.0379736	-0.0307816	-0.0715908	-0.075375
AC005856.1	-0.00184635	0.168052	-0.169081	0.0154368	-0.00787861	0.0301916	0.124374	0.303335	-0.161105	-0.161105	-0.0239019	0.500016	8.31228	7.28103	0.208542	-0.0864551	0.459532	0.50312	1.15562	-0.509067	-0.205304	-0.102135	-0.565018	-0.54551	-0.443122	-0.734884	-0.734884	-0.734884
AC005863.1	0.00634858	0.000182234	0.0070898	0	0	0.0105169	-0.000625609	-0.00716108	-0.00716108	-0.00134191	-0.00716108	-0.00716108	-0.00116926	-0.003016	0.030235	0.0142767	-0.0149231	-0.0408416	-0.0407632	0.000717604	0	0.0102523	0.00816273	0.00805473	0	0.000377357	0	0
AC005865.1	0.0281647	0.0217356	0.0135192	0.0338189	0.0345764	-0.0025352	0.0630446	-0.00102315	-0.00714574	0.0262803	0.110919	0.0759011	0.0133438	0.0381825	0.0692622	0.0616134	0	0	0.144314	0.0675868	0.0563702	0.0986706	0.0748131	0.0546464	0.0712129	0.0573693	0.130305	0.00731543
AC005871.1	0	0	0	0	0	0	0	0	0	0	0	0	0	0	0	0	0	0	0	0	0	0	0	0	0	0	0	0
AC005871.2	0	0	0	0	0	0	0	0	0	0	0	0	0	0	0	0	0	0	0	0	0	0	0	0	0	0	0	0
AC005884.1	0.00186267	-0.0421413	-0.00033786	-0.0421413	-0.0421413	-0.0783936	-0.00586956	-0.00800685	-0.0783936	-0.0783936	0.0746434	0.0112497	7.91514	7.67876	-0.396971	-0.0454462	-0.215421	-0.0468867	-0.0788083	0.178322	0.330416	0	0.0874797	0.203953	0	0.0947204	0.417173	0.0979192
AC005884.2	-0.778413	-0.322522	-0.43991	0.357408	-0.52577	-2.99327	-1.74893	-1.68468	-1.05177	-2.85969	-2.99327	-0.0480405	-2.87108	-2.90165	0.580869	0.70878	0.882624	0.627957	0.571425	0.0849969	-0.779213	-0.650211	0.248867	-0.997726	0.335495	-0.95417	-0.731659	0.573916
AC005899.1	0.00381428	-0.0375681	-0.0956879	0.00855173	0.0999516	0.0997784	0.0470082	0.0538621	0.0986768	0.076745	0.348979	0.200485	0.0717641	0.465361	-0.509865	-0.295581	-0.00573554	-0.207736	-0.16535	0.112722	0.0501694	-0.0989816	-0.04063	-0.0284413	0.517888	0.02616	0.216919	-0.0989408
AC005899.3	0	0	3.57307e-07	0	0	0	0	0	0	0	0	0	0	0	3.64e-06	-3.68e-06	0.627643	-3.68e-06	0.348976	0	0	0.205099	0	6.44e-07	0	3.54e-05	0	0
AC005899.5	0.0500242	-2.17842e-05	0.105249	0.155519	0.0186449	0	0	0	0	0.0417258	0.057004	0	0.0347314	0.0620249	0.181895	9.34e-06	0.0219064	3.25e-05	0.218496	0.0638728	0.0803783	0.0739381	0.112805	3.12e-05	0.388221	7.43e-05	0.0707572	0.054982
AC005899.6	-0.0580372	-0.344021	0.117838	0.219076	-0.352056	-0.318177	-0.0503062	0.169716	0.204055	0.349336	0.510488	0.852513	0.461169	0.121991	0.523248	-0.710611	0.512725	0.579012	0.404622	-0.245286	0.806344	-0.386831	0.394675	0.218652	-0.427772	-0.487299	-0.468291	-0.23879
AC005899.7	0.10058	0.094812	0.182267	0.107134	0.0466908	0.0235391	-0.00876943	0.00339989	-0.0971937	0.174147	0.259853	0.192964	0.151368	0.254672	0.139213	0.0167866	-0.0962668	0.134553	0.129979	0.0136824	-0.120765	-0.0529744	0.147419	0.176841	0.215507	0.170593	0.381871	0.123362
AC005899.8	-0.0341443	-0.0524376	-0.0637679	-0.057289	-0.0743969	-0.0438925	-0.0174412	-0.0237897	0.00550166	-0.0409679	-0.0216349	-0.00117297	-0.00390971	0.0285177	-0.0140837	0.0758891	-0.103869	0.0880155	-0.0339657	0.0182951	0.038551	-0.00286881	0.0248008	0.0358226	0.0457174	0.0826245	0.00877348	0.181863
AC005901.1	0	0	0	0	0	0	0	0	0	0	0	0	0	0	0.118364	0	0	0.124797	0.255583	-0.0747155	0.00760373	-0.0747155	-0.0747155	-0.0747155	-0.0747155	-0.0747155	-0.0747155	-0.0747155
AC005908.2	0	0	0	0	0	0	0	0	0	0	0	0	0	0	0	0	0	0	0	0	0	0	0	0	0	0	0	0
AC005909.1	-0.0286641	-0.0286641	0.00541462	-0.0286641	-0.0286641	-0.0430435	-0.105943	0.0414654	0.0219089	-0.105943	-0.105943	-0.0577677	-0.0780874	-0.105943	0	0	0	0	0	0.127609	-0.033193	-0.033193	-0.033193	0.0507058	0.0761254	0.0836344	-0.033193	0.0459031
AC005920.1	0.00291916	0.00272455	-0.00859938	-0.00859938	0.00143728	-0.00384465	0.00843343	-0.0108107	-0.00248842	-0.0108107	-0.00171025	-0.0108107	0.0139163	0.715486	0.0294909	0	0	0	0.027223	-0.0149829	-0.0149829	-0.0149829	0.00466045	-0.0149829	-0.0149829	-0.0149829	-0.0149829	-0.00396826
AC005920.2	0	0	0	0	0	0	0	0	0	0	0	0	0	0	-0.427363	-0.427363	-0.153846	-0.427363	-0.427363	0	0	0	0	0	0	0	0	0
AC005920.3	0.0537745	0	0	0	0	0.0622982	0	0	0	0	0	0	0	0	0.166789	0.127015	0.152483	0.4118	0.0203056	0.0947239	0	0	0	0	0.0546674	0	0	0
AC005920.4	0	0	0	0	0	0	0	0	0	0	0	0	0	0	0	0	0	0.439119	0.141328	0	0	0	0	0	0	0	0	0
AC005921.2	-0.0406512	-0.040659	-0.000433844	-0.040659	-0.040659	-0.038235	-0.00165154	-0.038235	-0.00584444	-0.00681039	-0.038235	0.0444862	-0.038235	-0.038235	0.000163142	0.098782	0.000584392	0.0019109	-0.00108346	-0.0179143	0.0256149	-0.100395	-0.0449896	-0.0446825	-0.100381	-0.0521752	-0.100395	0.0858883
AC005943.1	-0.0373323	-0.39602	-0.395061	-0.589689	-0.315958	0.20576	-0.225459	-0.294461	-0.306211	-0.14731	-0.151918	-0.191873	-0.655798	-1.22105	-0.119635	-0.054383	0.0217413	-0.014066	-0.0458802	0.959703	0.809615	0.865113	0.68774	0.569531	0.186333	0.567157	0.946726	0.876927
AC005944.1	-0.0318041	-0.373172	-0.23349	0.347168	0.0948259	-0.0285964	0.207247	0.121679	0.307792	0.049651	0.0845584	0.617446	-0.00547808	-0.0981006	-0.0329025	0.0393427	-0.807684	-0.665474	-0.56957	0.12118	0.385559	0.139496	0.160296	0.055974	0.359437	0.481871	0.453391	0.342911
AC005954.2	-2.75071e-05	-2.75071e-05	-2.75071e-05	-2.75071e-05	-2.75071e-05	-0.0513058	-0.0513058	-0.0513058	-0.0513058	-0.0513058	-0.0513058	-0.0513058	-0.0513058	-0.0513058	-0.0147696	-0.13671	0.133836	-0.116025	0.0125191	0	0.000163373	5.08e-06	0	0.0713513	0	0.0622294	5.64e-05	0
AC005962.1	0.117335	0	0	0.0412229	0.0824696	0.0105923	0.0710889	-0.00723823	-0.00357226	0.0427198	0.107107	0.00279583	0.245438	0.0632838	0	0	0	0	0.272926	-0.0246211	0.0380867	0.028193	0.128606	-0.0045961	0.0308969	-0.0590437	-0.0590437	0.0794554
AC005972.1	-0.0226788	0.0332576	-0.0226788	0.00328897	-0.0226788	0.0265712	0.0487005	0.0303529	0.0224941	-0.0252715	0.0270144	0.0373106	0.0139359	1.66776	-0.0724493	-0.0724493	0.00309916	0.124034	0.133683	0.0343542	0.000965673	0.13284	-0.00475488	-0.00665692	-0.0423562	-0.0423562	-0.0423562	0.048708
AC005972.4	-0.175864	-0.0171258	-0.215883	-0.173902	-0.218739	0.26896	0.334997	0.317022	0.476857	0.325485	0.33201	0.362502	0.763763	0.733493	0.307869	0.0673859	0.465164	0.416552	0.720872	0.106968	0.0523185	-0.0178658	0.121681	0.238085	0.0987572	0.256028	0.429933	-0.0967492
AC005993.1	0	0.0939635	0	0	0	0	0	0	0	0	0	0.0839716	0	0.363441	0	0	0	0	0	0	0	0	0	0	0	0	0	0
AC005996.1	0.220032	0	0	0	0	0	0	0	0	0	0	0	0	0.0357602	0	0	0	0	0	0	0	0	0	0	0	0	0	0
AC005999.1	0	0	0	0	0	0	0	0	0	0	0	0	0	0	0	0	0	0	0	0	0	0	0	0	0	0	0	0
AC006004.1	0.00986575	0.0193978	4.43718e-05	-1.36094e-06	4.36985e-05	0.0186884	0	0.00881116	0	0	0.0106875	0	0.00854128	0.00591517	0.062764	0.0180036	0.0386606	0.00641929	-0.00613991	0.00465855	0	0.0226539	0.0125076	0.0135625	0	0	0	0.0129987
AC006007.1	0	0	0	0	0	0	0	0	0	0	0	0	0	0	0	0	0	0	0	0	0	0	0	0	0	0	0	0
AC006012.1	0	0	0	0	0	-0.0409102	-0.0409102	-0.0409102	-0.0409102	-0.0409102	-0.0409102	0.0568003	0.0766735	0.00162846	0	0	0	0	0	0	0	0	0.0439198	0	0	0.0421664	0	0
AC006013.1	-0.0342573	0.00329382	-0.0342573	-0.0342573	-0.0342573	-0.0711059	-0.0711059	-0.0711059	-0.0437417	-0.0711059	-0.0711059	-0.0711059	-0.0711059	-0.0711059	0	0	0.0891402	0	0	-0.0370566	-0.0653002	-0.0167693	0.0249988	-0.0204554	-0.0653002	-0.0653002	-0.0653002	-0.0653002
AC006017.1	-0.0590526	0.0550195	-0.0995079	0.0201179	-0.0995079	-0.0485238	0.034936	0.00744555	0.0341492	-0.0755876	-0.0326271	-0.0385629	1.84052	-0.0278022	0.0711212	0.162724	0.181055	0.16474	0.16467	0.108101	-0.0321215	0.142862	-0.0227303	0.108147	-0.00748282	0.0907737	0.00860437	-0.0435665
AC006019.1	0.0676485	0.0291339	0.112134	0.108754	0.118418	-0.0377491	0.00951643	-0.023003	-0.143378	-0.0519769	-0.0524661	-0.122158	-0.138456	-0.154076	0.0635046	-0.0547181	0.097482	-0.0408939	0.0784616	0.0535486	0.175055	0.234642	0.178999	0.208304	0.210592	0.21874	0.298727	0.115234
AC006019.2	0	0	0	0	0	0	0	0	0	0	0	0	0	0	0	0	0	0	0	0	0	0	0	0	0	0	0	0
AC006019.3	0	0	0	0	0	0	0	0	0	0	0	0	0	0	0	0	0	0	0	0	0	0	0	0	0	0	0	0
AC006026.3	0	0.618712	0	0	0	-0.649419	-0.649419	0.244829	-0.649419	0.32357	-0.213312	-0.127024	-0.649419	-0.0845389	-0.578059	-1.3026	-0.501102	-1.3026	0.207734	1.15616	1.5637	0.632896	1.99218	0.629673	1.02566	0.607628	2.10582	0.891054
AC006027.1	0	0.0355619	0	0	0	0	0.0319952	0.0366349	0.0282105	0	0	0.0324172	0	0.0936007	0.000734333	0.00237222	0.0248411	0.000911513	-0.00121289	0.114845	0.0061398	-0.00451476	0.013223	-0.00997844	-0.0497562	0.0324038	0.0411595	-0.0497562
AC006030.1	0.0278974	0.0219508	0.0300233	0.0385592	-0.0242647	0.019045	0.0163585	-0.0119932	0.00369277	0.0710847	0.0642761	0.121393	0.170991	0.106957	0.019148	0.0309968	0.0818946	0.0423931	0.120899	0.0744197	0.0635736	0.0578659	0.0509852	0.0570271	0.0826252	0.0637364	0.118008	0.0396684
AC006033.2	-0.0326589	-0.0725392	-0.115172	-0.0831779	-0.0938869	-0.0709525	-0.0529925	-0.114099	-0.159608	-0.221891	-0.240996	-0.300882	-0.276696	-0.300882	-0.148339	-0.227993	-0.362496	-0.167829	-0.244069	0.149798	0.131692	0.00853395	0.13525	0.18218	0.0741111	-0.00123296	-0.198589	-0.0805488
AC006037.1	0	0	0	0	0	0	0	0	0	0	0	0	0	0	0	0	0	0	0	0	0	0	0	0	0	0	0	0
AC006041.1	0	0	0	0	0	0	0	0	0	0	0	0	0.0892959	0	0	0	0	0	0	0	0	0	0	0	0	0.145279	0	0
AC006042.1	0	0	0	0	0	0	0	0	0	0.0447632	0.0616121	0	0	0.0584646	0.131164	0	0	0	0.14281	0	0	0	0	0.077588	0	0.0677721	0	0
AC006042.2	0.00481373	0.0136541	0.00818799	0.155544	0.056299	0.0346285	0.0466713	0.246017	0.209267	0.228956	0.241851	0	0.0709212	0.297316	-0.319113	-0.380956	0.0731904	-0.525324	-0.0674679	-0.296362	-0.219069	-0.296362	-0.187845	-0.296362	-0.141122	-0.234089	-0.228434	-0.232777
AC006042.4	-0.070303	0.0692033	0.0319632	0.0762404	-0.139515	-0.208756	-0.211633	0.0346176	-0.178703	0.086749	0.0957635	-0.0826533	0.00767799	-0.056148	-0.707609	-0.251229	-0.503042	-0.528891	-0.156753	0.0559914	0.0379936	-0.0266663	0.0862892	0.0273902	0.148891	0.0932464	0.3106	-0.0671035
AC006055.1	0	0	0	0	0	0	0	0	0	0	0	0	0	0	0	0	0	0	0	0	0	0	0	0	0	0	0	0
AC006058.1	0.103982	-0.235848	-0.153818	-0.834738	-0.941603	0.462875	0.669979	0.676701	0.195689	0.344821	0.292115	-1.35792	-1.5008	-1.59889	-0.180961	-0.403116	-0.524343	-0.731539	-0.619606	0.278192	0.514683	0.630836	0.665895	0.481205	0.349516	0.46707	-0.0922489	-0.426096
AC006058.2	-0.0547633	-0.0547633	0.102017	-0.0547633	-0.0547633	-0.0524773	0.0472864	0.550804	0.365221	-0.0137429	-0.0524773	-0.0524773	-0.0524773	-0.0524773	0	0.114016	0	0	0	0	0.0831521	0	0	0	0	0	0	0
AC006058.3	-0.245846	-0.263123	-0.183859	-0.242856	-0.213315	-0.0505042	-0.051497	-0.0501336	-0.264661	-0.607489	-0.609292	-0.61783	-0.952153	-0.847084	-0.141013	-0.0069167	-0.166086	-0.183634	-0.451165	-0.148557	-0.000566881	-0.0989405	-0.0850302	0.0445884	0.011242	0.141396	-0.155921	-0.216795
AC006059.1	0.0539324	-0.039032	-0.214841	0.212961	0.0648198	0.435468	0.311602	0.284309	0.324267	0.328941	0.316087	0.587533	0.240202	0.350184	-0.146839	0.0735289	0.128218	-0.0401821	0.234749	0.0707738	0.630622	0.394285	0.419077	0.578337	-0.220148	0.0192876	0.0111659	0.548477
AC006063.2	0	0	0	0	0	0	0	0	0	0	0	0	0	0	0	0	0	0	0	0	0	0	0	0	0	0	0	0
AC006064.1	0.00577594	0.0619329	-0.00039407	-0.0532581	-0.0534016	0	0	0	0	0.0396696	0.0524561	0	0.0722793	0.0608279	-0.0423117	0.128191	0.202855	-0.117554	0.0822709	0.224838	4.14e-05	0.0722234	2.31e-05	0.000429586	0.110266	0.000229606	0.0837666	-0.000342235
AC006064.2	-0.108003	-0.222044	-0.190774	-0.0499569	-0.0965769	0.0216701	0.0667762	-0.00935654	0.131681	0.124136	0.120963	-0.0245312	0.30132	0.273595	0.333191	0.245437	0.350269	0.12432	0.138549	0.0131112	0.0300532	0.0836847	0.0982223	0.0543595	0.218993	0.128843	0.202952	0.0945804
AC006064.3	0.0809699	0.207789	0.320596	0.253038	0.248136	-0.110225	-0.0476461	-0.110683	-0.157131	-0.419203	-0.475858	-0.0735868	0.0366795	-0.358616	-0.399857	0.318562	-0.207801	-0.277969	-0.283514	-0.0203242	0.361079	0.0284447	0.318071	-0.269256	0.121861	0.0414659	-0.299808	-0.091092
AC006064.4	-0.729102	-0.680893	-0.95004	-0.394492	-0.473115	-0.919076	-0.111707	-0.197754	0.148388	-0.544631	-0.418134	-0.0648206	-1.0324	-1.80592	0.192632	-0.00159058	0.441798	-0.318336	-0.115027	0.0907769	-0.0479046	-0.243685	-0.0144366	-0.267261	-0.836676	-0.58497	-1.02836	-0.429205
AC006064.6	0.061509	-0.394764	0.184964	-0.604423	-0.0306968	0.375919	0.42852	0.0538143	0.426952	0.184745	0.122752	-0.515623	-0.799012	-0.629876	-0.662361	-0.705671	-0.45637	-0.624431	-0.798146	0.567926	0.767046	0.0870479	0.38462	0.0142776	0.140695	-0.00306561	-0.420449	-0.17473
AC006065.3	0	0	0	0	0	0	0	0	0	0	0	0	0	0	0	0	0	0	0	0	0	0	0	0	0	0	0	0
AC006065.4	0	0	0	0	0	0	0	0	0.13361	0	0	0	0	0	0	0	0	0	0	0	0	0	0	0	0	0	0	0
AC006076.1	0	0	0	0	0	0	0	0	0	0	0	0	0	0	0	0	0.259758	0	0	0	0	0	0	0	0	0	0	0
AC006111.1	0.121068	0	0	0	0.130265	0.08605	0	0	0.303132	0	0	0	0	0	4.76e-05	9.01e-05	0.000126994	0	0	0.141301	0	0.163473	0	0	0	0	0	0
AC006111.3	0	0.108407	0	0.0985911	0	0.303512	0	0	0.077578	0	0.18399	0.108134	0.0658145	3.70926	0.530075	0	0.436627	0.205591	0.199232	-0.134458	-0.134458	-0.134458	0.148922	-0.0294852	0.140262	0.0804565	-0.0105102	0.0746451
AC006115.1	0.00662306	0.060714	-0.000632136	-0.00456854	0.0540566	0.0479738	0.04979	0.055489	-0.000271818	0.0297012	0.00159126	0.119642	-0.0195616	0.0683993	-0.00796683	-0.0206094	0.112739	-0.0153383	0.236423	0.0002144	0	0.0811731	0	0.000133352	0	0.0631455	3.57e-05	0.0690465
AC006115.3	0	0	0	0	0	0	0	0	0	0	0	0.0483913	0.0407945	0.0247245	0	0	0	0	0	0	0	0	0	0	0	0	0	0
AC006116.4	0.0117509	-0.0630427	-0.0630427	0.0106885	-0.0630427	0.128838	0.0660145	0.0749667	0.0587541	0.0550278	0	0.0823445	0.100737	0.120888	0.443949	0.634341	0.349248	0.543379	0.331042	0.143803	0.109835	0.0991894	0	0	0.116593	0.249545	0	0
AC006116.8	0.00237396	0.0176099	-0.00950193	-0.0112921	-0.0232535	-0.203523	-0.0451673	-0.231125	-0.161571	-0.013221	-0.031242	-0.0617774	-0.0776791	-0.00747031	0.0884577	-0.0287837	0.205395	0.175989	0.287342	0.00747996	0.0239682	0.0886022	0.167658	0.057771	-0.0201913	0.0242766	-0.00146098	0.0448059
AC006116.9	0.0792977	-0.132352	0.212156	0.0437991	0.0496502	0.0293384	0.0290906	-0.108202	-0.130177	-0.0146109	0.156221	0.193355	0.0351029	0.150445	0.593686	0.198039	0.222143	0.227198	0.460012	0.119777	0.338656	0.0038261	0.201454	0.317454	0.124137	0.0433419	0.00859151	-0.0190523
AC006130.1	0	0	0	0	0	0	0	0	0	0	0	0	0	0	0.126366	0	0	0	0	0	0	0	0	0	0	0	0	0
AC006145.1	0.0540498	-0.0315871	0.0877238	-0.0242422	-0.0302335	0.10303	0.191011	0.213493	0.0756127	0.13614	0.135678	0.146084	0.223735	0.212349	-0.470329	-0.620939	-0.502658	-0.339619	-0.233754	0.219343	0.194007	0.230296	0.0643819	0.145155	0.201064	0.137894	0.351794	-0.00875955
AC006146.1	0	0	0	0.0708994	0	0	0.0350642	0	0.247484	0	0	0	0.0289795	0.0186744	0.00426297	0.168759	-0.00102124	0.0930997	0.0904637	0	0	2.71e-05	0	0	0	0.116392	0	0
AC006148.1	0	0	0	0	0	0	0	0	0	0	0	0	0	0	0	0	0	0	0	0	0	0	0	0	0	0.091304	0	0
AC006148.2	-0.520347	-0.175578	-0.335596	-0.338234	-0.318434	0.0667388	0.134251	0.11784	0.381693	0.188454	0.295181	0.729013	1.22195	1.53456	0.196343	0	0.537849	0.289131	1.07518	-0.0752845	-0.107318	-0.114234	-0.173428	-0.022386	-0.173428	0.0999378	0.794474	0.561748
AC006150.1	0	0	0	0	0	0	0	0	0	0	0	0	0	0	0	0	0	0	0	0	0	0	0	0	0	0	0	0
AC006157.1	0	0	0	0	0	0	0	0	0	0	0	0	0	0	0	0	0	0	0	0	0	0	0	0	0	0	0	0
AC006159.1	0	0	0	0	0	0	0	0.217514	0.090807	0	0	0	0	0	-0.0659743	-0.0613498	-0.0625113	0.078827	-0.13997	0	0.136764	0	0	0	0	0	0	0
AC006159.2	-0.0718381	-0.107538	0.0217824	0.00104396	-0.107774	-0.154829	0.0106547	-0.030972	-0.199921	-0.142313	-0.207203	-0.243954	0.0268951	0.0164798	0.164759	-0.0711588	0.185489	0.282196	0.434701	-0.00907563	-0.0690434	0.00812927	-0.137712	-0.181575	0.0231838	0.131714	-0.0204129	-0.181575
AC006160.1	0.0758449	-0.0284251	0.167271	0.0381868	0.0368781	-0.244392	-0.287826	-0.252211	-0.287826	-0.131582	-0.220505	-0.179328	-0.206948	-0.186625	-0.404662	-0.359904	-0.238863	-0.488778	-0.407439	0.0556536	0.190211	0	0.0620401	0.247744	0.0582433	0.235396	0.357115	0.125075
AC006205.1	0	0	0	0	0	0	0	0	0	0	0	0	0	0	0	0	0	0	0	0	0	0	0	0	0	0	0	0
AC006206.1	0	0	0	0	0	0	0	0	0	0	0	0	0	0	0	0	0	0	0	0	0	0	0	0.00834846	0	0	0	0
AC006206.2	-0.039936	0.00826301	-0.039936	-0.0175619	-0.039936	0.00923102	0.082177	0.0741506	0.0348695	0.0307861	0.01863	-0.0227232	-0.0227232	-0.0227232	-0.154003	-0.219526	-0.219526	-0.219526	-0.159638	0.0530087	0.22539	-0.0495183	0.0156785	-0.112719	-0.17907	-0.152289	-0.114818	-0.0647316
AC006207.1	0.0148243	-0.130814	-0.130814	-0.130814	-0.130814	0	0	0	0	0	0	0.24437	0	0	0	0	0	0	0	0	0	0	0	0	0	0	0	0
AC006213.1	-0.0715655	-0.0264448	-0.00615576	-0.0011817	-0.0496013	-0.151643	0.027493	-0.0724191	0.0140828	-0.0229946	-0.0303589	0.0814375	0.181063	0.152125	0.0439307	-0.128958	0.262331	-0.128503	0.324469	0.159267	0.0699428	0.0333109	0.208311	0.216115	0.120342	0.263106	0.438011	0.220788
AC006213.2	0.551946	0.70109	0.313098	0.378094	0.0454428	-0.162006	0.471947	-0.0336182	0.132087	-0.142725	-0.00612203	0.0439563	0.418438	0.376649	0.118948	0.628483	0.727878	0.425837	0.601898	0.0693427	0.462651	0.336893	0.21517	0.234052	0.792206	0.67674	0.717088	0.701735
AC006213.3	-0.038243	0.0619568	-0.414982	-0.112866	-0.054439	-0.253149	-0.0664556	0.0684044	-0.254256	-0.098789	-0.119149	-0.223304	-0.0470757	0.0469514	0.448675	-0.0550128	0.24171	0.328995	0.251084	0.0851694	0.343243	0.079464	0.0354943	0.139386	-0.0220101	0.106618	0.110924	0.339454
AC006238.1	0.154459	0.013923	0.000485396	0.0156593	0.0043329	-0.201728	0.192092	-0.143265	-0.16149	0.096309	0.185115	-0.109321	-0.105158	-0.00797611	0.210404	0.0161311	0.573449	0.176539	0.0937517	0.171194	0.48818	0.131489	0.202338	0.137282	0.268822	0.188601	0.161604	0.386131
AC006252.1	0.300914	0.0819728	0.0696518	0.10406	0.0551432	-0.0363479	-0.0925209	-0.00959798	-0.136036	0.110385	0.106635	-0.0684401	-0.0548166	0.110775	-0.179439	4.58e-05	-0.108241	0.130205	-0.0477939	-0.0284134	0.101272	0.112236	0.408937	0.327251	0.210826	-0.0151616	0.23214	0.310489
AC006254.1	0.0512003	0.00529713	-0.0536342	0.00432472	-0.0577658	0.00284065	-0.0595123	0.00368167	0.0383575	-0.000439469	0.0460804	-0.00822365	0.00580566	0.0467841	-0.119746	-0.119207	0.0357527	0.0346196	0.0549032	0.179441	0.103155	0.112972	0.152197	0.170709	0.135292	0.159384	0.3774	0.132982
AC006262.2	8.4381e-05	0.0970266	-0.0463547	-0.0463547	-0.0463547	-0.212453	0.543153	-0.212453	0.230635	-0.14063	-0.212453	0.285537	-0.111878	-0.132975	-0.308945	-0.160957	-0.288604	-0.268487	-0.126103	0.0209709	0.105512	0.0493506	-0.0197247	-0.0713998	-0.0713998	-0.0152174	0.0623778	-0.0240001
AC006262.3	0	0	0	0	0	0	0	0	0	0	0	0	0.133268	0.0845702	0	0	0	0	0	0	0	0	0	0	0	0	0	0
AC006270.1	0	0	0	0	0	0	0	0	0	0	0	0	0	0	0	0	0	0	0	0	0	0	0	0	0	0	0	0
AC006272.1	0	0	0	0	0	0	0	0	0	0	0	0	0.0415865	0	0	0	0	0	0	0	0	0	0	0	0	0	0	0
AC006273.1	0.0156523	0.038859	0.0898019	-0.0480793	0.0592185	0	0	0.134659	0.0231546	0.108244	0.0543924	0.0324847	0.0222002	0.0839853	0.0922255	-0.052971	0.11596	-0.125353	-0.0551478	0.00144959	-0.0455028	0.0268007	-0.0455028	0.0660851	-0.0455028	-0.00819331	0.00153992	-0.0106028
AC006288.1	0	0	0	0	0	0	0	0	0	0	0	0	0	0	0	0	0	0	0	0	0	0	0	0	0	0	0	0
AC006296.1	0	0	0	0	0	0	0	0	0	0	0	0	0	0	0	0	0	0	0	0	0	0	0	0	0	0	0	0
AC006296.2	0	0	0	0	0	0	0	0	0	0	0	0	0	0	0	0	0	0	0	0	0	0	0	0	0	0	0	0
AC006299.1	0.0980414	-0.00279262	0.176758	0.169833	0.23639	0.153912	0.303906	-0.0312991	0.304401	0.000623573	0.0388639	0.0820746	0.286255	0.329396	0.226676	0.00544012	-0.00616066	0.232789	0.0621511	0.0972945	-0.0587679	0.0882348	-0.0109701	0.164912	0.0298354	0.177403	0.205068	0.299858
AC006305.1	-0.150015	-0.159	-0.175245	-0.290325	-0.320756	0.375628	0.0914617	-0.134322	0.214909	-0.153656	-0.319772	-0.395775	-0.306566	-0.328784	0.131669	-0.147703	-0.485379	-0.46449	-0.197788	-0.188436	-0.055038	0.0423127	-0.0517494	-0.133626	-0.309642	-0.395421	-0.451576	-0.479038
AC006305.2	0.17229	-0.0430404	0.161947	-0.0975356	-0.0469507	2.79558	1.70721	1.78769	0.0924512	0.0686378	-0.051886	-0.00243234	-0.0102995	0.0393417	0.19449	-0.344757	-0.466709	-0.212466	-0.0207523	0.00301003	0.0277954	-0.0848023	-0.274564	0.122075	-0.334245	-0.225573	-0.334245	-0.267987
AC006305.3	0	0	0	0	0	0	0	0	0	0	0	0	0	0.0384734	0	0	0	0	0	0	0	0	0	0	0	0	0	0
AC006329.1	0.209598	-0.191639	-0.138175	-0.553195	-0.320851	-0.75667	-0.912891	-1.17737	-1.11586	-1.15394	-1.14102	-1.69966	-1.68506	-1.73437	-0.598037	-0.644794	-0.515539	-0.798844	-0.809919	-0.0855847	-0.0419948	-0.268662	-0.373853	-0.358677	-0.585862	-0.737722	-0.943377	-0.94774
AC006333.1	0	0	0	0	0	0	0	0	0	0	0	0.0965561	0	0.0274422	0	0	0	0	0	0	0	0	0	0	0	0	0	0
AC006333.2	-0.0861591	-0.0630445	-0.166169	-0.197884	-0.288694	-0.196707	-0.141264	-0.102167	-0.442043	-0.345078	-0.370895	-0.38697	-0.22039	-0.268398	-0.00214594	0.0367399	0.103619	0.266596	0.169602	-0.0236956	0.140075	0.0974551	0.0319232	0.235585	0.180977	0.234043	0.424808	0.221998
AC006355.2	0	0	0	0	0	0	0	0	0	0	0	0	0.320458	0.0588051	0	0.703587	0.291346	0	0.257826	0	0	0	0	0.16899	0	0	0	0
AC006357.1	0	0	0	0	0	0	0	0	0	0	0	0	0	0	0	0	0	0	0	0	0	0	0	0	0	0	0	0
AC006369.1	-0.104083	-0.104763	0.00142437	0.00658313	-0.053811	0.0738601	-0.00353003	0.250591	0.173545	-0.0116397	0.150123	0.0428128	-0.0104832	-0.0270094	0.0887963	0.301521	-0.309985	-0.00324727	-0.00444367	-0.0831361	-0.147278	0.00546613	-0.0869737	-0.146178	0.0575132	0.0397527	-0.147278	-0.0247669
AC006369.2	0	0	0	0	0	0	0	0	0	0	0	0.129147	0	0	-0.181533	0.0587085	-0.181533	0.227288	-0.181533	0	0	0	0	0	0	0.211108	0	0
AC006372.1	0	0	0	0	0	0	0	0	0	0	0	0.211093	0.171479	0	0	0.151696	0	0	0	0	0	0	0	0	0	0	0.0718295	0
AC006372.2	0	0	0.162708	0	0	0	0	0	0	0	0	0	0.167963	0.174448	0	0	0	0	0	0	0	0	0	0	0	0	0	0
AC006372.3	-0.00414398	-0.00414398	-0.00414398	-0.00414398	-0.00414398	0.0165728	0.0412169	0.0481475	0.0387864	0.00865063	0.0213241	0.00458827	0.069569	0.0918178	0.0176892	0.00582958	0.00360137	0.0167092	-0.0109048	0.0144706	0.00845432	0	0.00728199	0	0	0.00627453	0	0
AC006378.1	0	0	0	0	0	0	0	0	0	0	0	0	0	0	0.536348	-0.0235424	0.0746619	0.457003	0.315195	0	0	0.107187	0	0	0	0.0621695	0	0
AC006435.1	-0.0150273	-0.0371082	-0.0371082	0.11118	0.0283902	-0.0209953	0.0184013	-0.0209953	0.0184359	-0.0209953	-0.00163144	0.067601	-0.0209953	-0.0209953	-0.00157963	0.00154446	0.00144893	-0.000277227	-0.000405381	-0.0166844	-0.00872951	0.0259798	-0.0218233	-0.0371875	0.0603899	-0.0345922	-0.00338978	0.0902859
AC006435.2	0.0837371	-0.0249916	0.00435206	0.0776326	0.033783	0.0198818	0.0968686	0	0	0.135303	0.0258073	0	0.0202137	0.119768	0.137662	-0.236444	0.28227	-0.15575	0.281609	-0.0452019	-0.0697839	-0.0274517	-0.0358532	-0.0697798	0.219208	0.0965541	-0.0697839	0.0956848
AC006435.3	0	0	0	0	0	0	0	0	0	0	0	0	0	0	0	0	0	0	0	0	0	0	0	0	0	0	0	0
AC006441.1	-0.0575281	-0.130532	-0.130532	-0.130532	-0.130532	0	0.0703613	0	0	0	0	0	0	0	0.342129	0.285435	0.944869	0.680303	0.613703	-0.0749179	-0.074891	-0.0748887	0.0270081	0.00987593	0.0816378	-0.0749214	-0.0749214	-0.0749214
AC006441.3	-0.346592	-0.434827	-0.358255	-0.297608	-0.431553	-0.207173	-0.0764109	-0.132686	0.0538606	-0.207173	-0.13531	-0.140402	-0.161858	-0.168946	0.180942	0.314706	-1.27e-05	0.00015998	-0.000152463	-0.414	-0.363432	-0.330116	-0.0477678	-0.0596559	-0.324895	-0.112533	-0.178142	-0.314467
AC006441.4	0.0680599	0	0	0	0	0	0	0	0.0933183	0	0	0	0	0	0.131286	0	0	0	0	0	0	0	0	0	0	0	0	0
AC006449.1	0	0	0	0	0	0	0	0	0	0	0	0	0	0	0	0	0	0	0	0	0	0	0	0	0	0	0	0
AC006449.2	0.0883921	0.0808648	0.141954	0.175338	0.0750102	-0.0388371	-0.0764454	-0.0636082	-0.0699724	-0.0932139	0.249212	0.163419	0.583177	0.619645	0.00140736	-0.252348	0.218169	-0.236229	-0.241388	0.0523677	0.176464	0.278834	0	0.357841	0.238522	0.223124	0.424792	0.562513
AC006449.3	0.0591254	0.0572115	0.153216	0.0599054	0.00690517	0	0.0472925	0.0459865	0.0504209	0.254914	0.421706	0.11998	0.724813	0.602686	0.371882	1.06e-05	0.00138974	0.121453	0.000399701	0	0	0.192233	0	0	0	0.0558035	0	0.0533965
AC006449.5	0.0312241	-0.0453231	-0.146105	-0.0416855	-0.0696058	-0.0566341	-0.0173121	-0.0715442	-0.151918	0.00500984	-0.00199692	0.0334033	0.0787045	0.3534	-0.0194342	-0.124361	-0.0145541	-0.156642	0.103102	0.0173503	0.104316	0.117673	0.0210589	0.116127	-0.0169452	0.14313	0.344005	0.335565
AC006449.6	-0.0880998	-0.0353081	-0.130223	-0.213281	-0.0209496	-0.2527	-0.207293	-0.160701	-0.212007	-0.216007	-0.234223	-0.234399	-0.280627	-0.202175	-0.344464	-0.312224	-0.154306	-0.255702	-0.233539	0.0538703	0.0692999	0.161325	0.109708	0.168857	-0.0512166	-0.0433427	0.303031	0.18171
AC006450.2	0	0	0	0	0	0	0	0	0	0	0	0	0	0	0	0	0	0	0	0	0	0	0	0	0	0	0	0
AC006450.3	0	0	0	0	0	0	0	0	0	0	0	0	0	0	0	0	0	0.0120228	0	0.000818672	0.00420356	0	0	0	0	0	0	0
AC006455.1	0	0	0	0	0	0	0	0	0	0	0	0	0	0	0	0	0	0	0	0	0	0	0	0	0	0	0	0
AC006455.4	0	0	0	0	0	0	0	0	0	0	0	0	0	0	0	0	0	0	0	-0.0404508	-0.0404508	-0.0404508	-0.0404508	-0.0404508	-0.0404508	-0.0404508	-0.0404508	-0.0404508
AC006458.1	0	0	0	0	0	0	0	0	0	0	0	0	0	0	0	0	0	0	0	0	0	0	0	0	0	0	0	0
AC006460.1	0	0	0	0	0	0	0	0	0.0633816	0	0.0316388	0.380811	0	3.17551	0.151411	-0.0816151	0.120703	-0.0816151	0.213241	0	0.0745108	0.0982302	0	0	0	0	0	0.038613
AC006480.2	0.132862	-0.00282122	0.011504	0.0275193	-0.0734072	-0.111184	-0.065116	0.129661	0.054661	0.0868943	0.0779486	-0.0442346	-0.03367	-0.0875405	0.343111	0.438622	0.356891	0.344877	0.483666	0.0918036	0.233911	0.066752	0.0966996	0.0507685	0.104054	0.154218	0.333069	-0.00446428
AC006482.1	0	0	0	0	0	0	0	0	0	0	0	0.224418	0	0	0	0	0	0	0	0	0	0	0	0	0	0	0	0
AC006483.2	0	0.172463	0	0.0661011	0	-0.227822	-0.174024	-0.166752	-0.227822	-0.227822	-0.227822	-0.172805	-0.0636624	0.0777581	-0.152197	-0.152197	-0.152197	0.230023	-0.0191595	0	0	0.119255	0.0659878	0.0795447	0.123357	0	0	0.142839
AC006486.1	0.955262	0.00622739	0.747559	0.607009	0.858281	-0.544107	-0.616368	-0.325004	-0.936956	-0.410286	-0.256957	-0.459349	0.118392	-0.466925	-0.877267	1.25827	-0.538362	-0.805681	-0.54035	0.0955203	0.315831	-0.541107	-0.337282	0.10712	-0.524483	-0.549566	-0.459944	-0.350642
AC006487.1	0	0	0	0	0	0	0	0	0	0	0	0	0	0	0.00884986	-0.0397728	-0.0397728	-0.0397728	0.00761734	0	0	0	0	0	0	0	0	0
AC006487.2	0	0	0	0	0	0	0	0	0	0	0	0	0.0367183	0	0	0	0	0	0	0	0	0	0	0	0	0	0	0
AC006504.1	0.189021	0.20602	0.165589	0.1487	0.0568485	0.187463	0.220844	0.169469	0.171057	0.158051	0.138731	0.513279	0.561978	0.925397	0.351743	0.57727	0.588285	0.701888	0.783008	0.0613993	0.192034	0.169862	0.230473	0.169615	0.156188	0.251839	0.458482	0.269206
AC006504.2	0	0	0	0	0	0	0	0	0	0	0	0	0	0	0	0	0	0	0	0	0	0	0	0	0	0	0	0
AC006504.5	0.164854	0.0270076	-0.0773922	-0.27724	-0.0946473	-0.319391	-0.293917	-0.544436	-0.609843	-0.335524	-0.285605	-0.780798	-0.543296	-0.575542	-0.187885	-0.323779	-0.230667	-0.213267	-0.725337	0.37575	0.247231	0.203941	0.266823	0.202435	-0.0147858	-0.253992	0.0777057	-0.302996
AC006511.4	0	0	0	0	0	0	0	0	0	0	0	0	0	0	0	0	0	0	0	0	0	0	0	0	0	0	0	0
AC006518.7	0.182568	-0.0747783	-0.169744	-0.189302	-0.0802376	0.406057	0.6638	0.361772	0.26536	0.494745	0.513392	0.752543	0.443082	0.530236	-0.1762	-0.483509	-0.377578	-0.579404	-0.122849	0.252396	0.0267635	0.0419205	0.149393	0.106095	0.629892	0.119492	-0.0631534	-0.256225
AC006538.2	-0.291021	-0.288842	-0.290945	0.0429136	-0.292469	0	0.940378	0.724674	0.444585	1.15912	1.1305	1.02036	1.17588	0.672048	0.537372	1.1704	1.6609	0.00715132	0.486812	-0.063061	-0.468939	-0.128317	-1.24728	-0.318094	-0.390272	-0.452234	0.430504	0.253248
AC006547.1	-0.0845901	-0.0712834	-0.137066	-0.0623014	-0.0860252	0.0845249	0	0.0316496	0.139467	0.0686575	0	0.0960838	0.0346921	0	0.409761	0.0148425	0.617592	0.18129	0.612233	0.116343	0.164948	0.0608756	0.198267	0.101639	0.0382904	0.159167	0.506914	0.0090614
AC006547.2	-0.0319781	-0.0784505	-0.0805527	-0.0849725	-0.0290125	-0.0614272	-0.0089952	0.0776186	-0.0614272	0.0226849	-0.000167168	0.00340102	-0.0243446	-0.0614272	-0.116862	-0.11658	-0.118267	-0.115266	-0.113617	-0.141039	-0.141039	0.0723287	-0.077061	0.113069	-0.0476973	-0.141039	0.0240886	-0.00259826
AC006547.3	0.0553933	0	0	0	0.0983751	0	0	0.0974224	0	0	0.0494579	0	0	0	0.00219295	-0.000399363	0.00592033	0.00215938	0.00864091	0	0.0763919	0	0	0	0.185063	0.0582126	0.291285	0.0507745
AC006557.1	0	0	0	0	0	0	0	0	0	0	0	0	0	0	-0.119659	-0.172125	-0.172125	-0.172125	-0.172125	0	0	0	0	0	0	0	0	0
AC006557.3	0	0	0	0	0	0	0	0	0	0	0	0	0	0	0	0	0	0	0	0	0	0	0	0	0	0	0	0
AC006581.1	0	0	0	0	0	0	0	0	0	0	0	0	0	0	0	0	0	0	0	0	0	0	0	0	0	0	0	0
AC006581.2	0.0818718	0	0	0.157412	0.0719571	0.206943	0.0653221	0.473896	0	0.19159	0.0627851	0.0670099	0.0543248	0.0715205	0	0.336245	0.178877	0	0.156787	0	0	0	0.0957149	0.0956235	0	0	0.110551	0.138214
AC006942.1	-0.0121178	0.126452	-0.024316	0.255839	0.0744491	0.145589	0.209815	0.27374	0.273395	0.322026	0.414617	0.137706	0.294728	0.172346	-0.373051	0.395242	0.128561	-0.169182	-0.152122	0.206418	0	0.35526	0.26823	0.251305	0.722734	0.131143	0.233045	0.185801
AC006946.2	0.0270782	0.00968705	0.0225854	0.0096215	0.00789223	0.018487	0.0197868	0.00155497	0.0269787	-0.00774186	0.00202357	0.00126545	0.0170865	0.0171847	-0.0132947	0.0411254	0.0633613	0.0659772	0.0455244	0.0384628	-0.00856585	-0.00644724	0.0255774	-0.0136368	0.0926754	0.0537368	-0.0101563	0.00857313
AC006946.3	0	0	0	0	0	0	0	0	0	0	0	0	0	0	0	0	0	0	0	0	0	0	0	0	0	0	0	0
AC006960.2	0.0638853	0.0552193	0	0	0	0	0	0	0.152647	0	0	0	0	0.0388015	-0.117211	-0.146413	-0.294243	-0.300456	-0.431603	0.083594	0.0848397	0	0	0	0	0	0	0
AC006960.3	-0.16109	-0.320953	-0.164648	-0.0776665	-0.278408	-0.0663238	-0.103534	-0.0667521	0.0449362	-0.0290644	-0.0331072	-0.0617953	-0.00800027	0.00372485	0.0686527	0.218178	-0.163247	-0.169861	0.108242	-0.119278	-0.179815	-0.0790193	0.0316927	-0.0860597	0.287411	0.109707	-0.0790995	-0.147493
AC006967.2	0	0	0	0	0	0	0	0	0	0	0	0	0	0	0	0	0	0	0	0	0	0	0	0	0	0	0	0
AC006967.3	-0.0275395	-0.00598465	-0.00634822	0.0162032	0.0302098	0.265835	0.171976	0	0.0969411	0.0862009	0.0230806	0.0197036	0.0149594	0.0124969	-0.0804744	-0.13231	-0.132479	-0.0763008	-0.072366	-0.0303475	-0.0115199	-0.0495642	-0.0503868	-0.044494	-0.0807043	-0.0530032	-0.0807043	-0.0228989
AC006974.1	0	0	0	0	0	0	0	0	0	0	0	0	0	0.0148975	0.0747357	0	0.04401	0	0	0	0	0	0	0	0	0	0	0
AC006974.2	0	0	0	0	0	0	0	0	0	0	0	0	0	0	0	0	0	0	0.0475387	0	0	0	0	0	0	0	0	0
AC006978.2	0.560482	0.202146	0.0512514	0.185108	0.00766079	0.301564	-0.414716	-0.28125	-0.478618	-0.123769	-0.155299	-0.392099	-0.367403	-0.232686	-0.369802	-0.401607	-0.43582	-0.3934	-0.233906	-0.124615	-0.160365	-0.102212	-0.0308209	0.0817976	0.0351205	-0.0409354	0.632851	-0.170995
AC007001.1	0	0	0	0	0	0	0	0	0	0	0	0	0	0	0	0	0	0	0	0	0	0	0	0	0	0	0	0
AC007009.1	0	0	0	0	0	0	0	0	0	0	0.129399	0	0	0	0	0	0	0	0	0	0	0	0	0	0	0	0	0
AC007014.1	-0.0393072	-0.0393072	0.00680226	0.0456129	-0.0393072	-0.0920681	-0.0920681	-0.0511706	-0.0920681	-0.0920681	-0.0920681	-0.0920681	-0.0920681	-0.0920681	0	0	0	0	0	0	0	0	0	0	0	0.0950682	0	0
AC007029.1	0	0	0	0	0.142675	0	0.123801	0	0	0	0	0.15177	0	0	0	0	0	0	0	0	0	0	0	0	0	0	0	0.153145
AC007032.1	0.0286348	-0.0159406	-0.180753	0.120466	0.0240488	-0.710087	-0.478604	-0.444242	-0.56764	-0.374823	-0.35967	-0.364364	-0.277106	-0.0707638	-0.162288	-0.0589518	-0.451413	0.0772276	-0.0653745	0.0705413	-0.0742018	0.208328	0.146832	0.170044	0.369784	0.190615	0.302656	0.193975
AC007036.1	0	0	0	0	0	0	0	0	0	0	0	0	0	0	0	0.163384	0	0	0	0	0	0	0	0	0	0	0	0
AC007038.1	-0.00184175	0.0473309	-0.00938201	0.00607689	-0.0215744	-0.00755703	-0.0293633	0.0512146	0.0120287	-0.0336146	-0.0453339	-0.0385737	-0.0507726	-0.0387618	0.150283	0.0649554	-0.145146	-0.11001	-0.0570739	0.0106846	0.00463768	0.0255234	-0.00364626	0.145464	-0.00980126	0.0936004	0.0219058	-0.0474994
AC007038.2	0.124932	0.0067786	0.00688155	-0.0508129	-0.0343541	0.0543585	-0.0942586	-0.128343	-0.398242	-0.00629795	0.0228542	-0.308195	-0.264237	-0.225303	-0.461426	-0.953871	-0.298139	-0.746926	-0.380163	0.11965	-0.371902	-0.0860238	-0.063892	0.209627	0.0311318	0.00445719	-0.368121	-0.102378
AC007040.1	0.00747931	-0.068287	0.0636712	-0.068287	0.0567522	-1.36899	-1.36899	-1.30966	-1.36899	-1.31956	-1.36899	-1.36899	-1.36899	-1.33803	-0.013002	-0.185998	-0.164125	-0.32192	0.0557156	0	0	0.153467	0.0890759	0	0	0.0713057	0	0.0686443
AC007040.2	-0.00490146	-0.0278163	-0.0315694	-0.0253945	-0.0334114	0.330246	0.0192593	-0.00161075	-0.0200985	-0.00201021	-0.0141089	-0.0127512	-0.0892332	0.0297512	-0.0128506	-0.0618149	-0.0929671	-0.17298	-0.108328	0.0934643	0.227766	0.134076	0.166106	0.08848	0.111681	-0.0644696	-0.0466772	-0.0279573
AC007064.2	0	0	0	0	0	-0.0665748	-0.0102647	-0.0114788	-0.00632194	-0.0665748	-0.0043499	-0.0665748	-0.0665748	3.73845	0	0	0.158179	0	0	0	0	0.0772342	0.105963	0	0	0.0663734	0.25794	0.13633
AC007091.1	0.0514492	0.0574153	0.00823262	0.0966446	0.103465	0.188191	0.0445696	0.00396034	0.140315	0.120871	0.240746	0.0817057	0.263842	0.132335	0.0966184	-0.0415181	0.109846	0.149335	0.258355	0.0803502	0.079532	0	0.0695711	0.0696031	0	0.218376	0	0.325027
AC007099.1	0.00437861	0.0304855	0.00334085	0.0406225	0.042658	0.0363162	0.114911	0.0403891	0.0595873	0	0.0985621	0.0276492	3.23292	10.3252	-0.403293	-0.27719	-0.191063	-0.215931	-0.307908	0.000596836	-0.00561853	-0.0487322	-0.041391	0.0182545	0.0616901	-0.0346732	0.0281999	-0.0515841
AC007099.2	0	0	0	0	0	0	0	0	0	0	0	0	0	0	0.232965	0	0	0	0	0	0	0	0	0	0	0	0	0
AC007100.1	0	0	0	0	0	0	0	0	0	0	0	0	0	0	0	0	0.157362	0	0	0	0	0	0	0	0	0	0	0
AC007106.1	0	0	0	0	0	0	0	0	0	0	0	0	0.0721204	0.0225308	0.119481	0	0	0	0	0	0	0	0	0	0	0	0	0
AC007114.1	-0.329152	0.0517966	-0.0884479	-0.130354	-0.181632	0.428818	0.638575	0.253145	0.421155	0.37151	0.53611	0.738614	1.34798	1.52052	-0.158815	0.154588	0.7328	0.416496	0.831033	-0.133459	-0.366069	0.16771	0.379301	-0.135445	0.0148761	0.10363	0.598949	0.576215
AC007114.2	0	0.00452634	0	0.00945791	0	0.00316978	0	0.0238947	0.0186588	0	0	0	0.00413528	0	0.00868836	-0.0167686	-0.0137052	-0.0285184	-0.0207054	0.000149981	0	0.00706225	0	0	4.67e-06	8.63e-06	0.00199654	0.0106913
AC007126.1	0.0628457	0.0694471	-0.00151414	0.0621215	-0.0109252	0.0224282	0.0276283	0.0364151	0.0148586	0.0156253	0.0176204	0.0732097	0.0916186	0.131036	0.0213719	0.0357148	0.124846	0.0577223	0.244103	0.0374568	-0.00836329	0.0758448	0.103749	0.0120145	0.0624338	0.120166	0.183857	0.0999827
AC007128.1	0	0	0	0	0	0	0	0	0	0	0	0	0	0	0	0.0378122	0.0141421	0	0	0	0	0	0	0	0	0	0	0
AC007128.2	0	0.000206104	0	0	0	0	0	0	0	0	0	0	0	0	0	0.000615814	0.0866748	0.000640961	0	-0.000306796	-0.000521055	-8.16e-05	-0.000521055	-0.000495378	-0.000521055	-0.000521055	-0.000521055	-0.000521055
AC007159.1	0	0	0	0	0	0	0	0	0	0	0	0	0	0	0	0	0	0	0	0	0	0	0	0	0	0	0	0
AC007163.1	0.095412	0.00491273	0.0602892	-0.0235125	-0.0235125	-0.112499	-0.0172782	-0.0834669	-0.0200374	-0.0669315	-0.0878526	-0.0229848	-0.0907824	-0.0618591	-0.143142	0.0820435	0.205474	0.686178	0.270311	0.0235067	0.044365	0.10107	0.0324545	0.0395154	0	0.0661169	0	0
AC007179.1	0	0	0	0	0	0	0	0	0	0	0	0	0	0.0509505	0	0	0	0	0	0	0	0	0	0	0	0	0	0
AC007179.2	0	0	0	0	0	0	0	0	0	0	0	0	0	0	0	0.100752	0	0	0	0	0	0	0	0	0	0	0	0
AC007182.1	0	0	0.00971221	0.0107304	0	0	0	0	0	0	0.0679994	0	0.00852427	0.00590335	-0.026886	-0.0267072	-0.0277638	-0.0295446	-0.0287923	0	0	0	0	0	0	0	0	0
AC007192.1	0.274272	0.161585	0.184399	0.107963	0.18909	0.26473	-0.0107301	0.072731	0.245022	0.0692001	0.0439989	0.244499	0.0469378	0.0555471	0.404544	0.366642	0.447893	0.379506	0.382085	0.0211552	0.232963	0.0815481	0.166347	-0.0124767	0.459214	0.0766248	0.437155	-0.0950448
AC007192.2	-0.0596225	-0.0596225	-0.0596225	0.157226	-0.0596225	0	0	0	0	0	0	0.0651456	0.0443339	0	-0.00158553	0.138421	-0.00154723	-0.00283526	-0.00115001	-0.0679392	-0.0679392	0.0187115	-0.0679392	-0.0679392	-0.0679392	0.0160741	-0.0679392	-0.0679392
AC007193.1	0	0	0	0	0	-0.0728233	-0.0728233	-0.0728233	-0.0728233	-0.0728233	-0.0728233	-0.0728233	-0.0728233	-0.0728233	0	0	0	0	0	0	0	0	0	0	0	0	0	0
AC007193.2	0	0	0	0	0	0	0	0	0	0	0	0	0	0	0	0.18279	0	0	0.163217	0	0	0	0	0	0	0	0	0
AC007193.3	0.0237544	-0.331606	-0.331606	-0.331606	-0.331606	-0.38834	-0.0884915	-0.38834	-0.38834	-0.159631	-0.38834	-0.38834	-0.38834	-0.38834	-0.611415	-0.611415	-0.611415	-0.611415	-0.611415	0.274109	0	0	0	0	0	0	0	0
AC007207.2	0.0660852	-0.100962	-0.0458462	-0.100962	-0.0466328	0.0515335	-0.00227922	-0.0523633	0.0958155	0.0272413	-0.00452579	0.125031	0.0163809	0.130335	0	0.124787	0	0	0.0816745	-0.0849981	0.0712346	0.0563957	-0.0849981	-0.0849981	-0.0849981	-0.0849981	-0.0849981	-0.0849981
AC007216.1	0.104014	0	0.0471317	0.0916565	0	0	0.0441327	0	0	0.0342681	0.0473344	0	0.21593	0.210007	0.0156994	-0.0947585	0.0296788	-0.0947585	-0.0947585	0	0	0	0.052978	0	0.455234	0.215741	0	0
AC007216.2	-1.05798e-08	-1.05798e-08	-1.05798e-08	2.23521e-06	0.000281115	0	0	0	0	0	0	0	0	0	-2.02e-06	4.86e-05	4.33e-05	1.84e-05	-2.02e-06	-0.000273239	-0.000369635	-0.000372318	-0.000197321	0.228946	0.149606	-0.000186581	-0.000372318	-0.000372318
AC007216.4	-0.128214	0.0317575	-0.128214	-0.128214	-0.0753223	0.0601473	-0.0508875	-0.0983062	-0.056542	-0.0983062	-0.0427914	-0.0983062	-0.0983062	-0.0698066	-0.427529	-0.0323626	0.0371508	-0.305549	-0.296713	0.0509096	0.0383078	0.132031	0.1817	0.0154431	0.0995664	-0.0679702	0.118423	-0.0559283
AC007218.1	0	0	0.00311032	0	0	0.0278185	0	0	0	0	0	0	0	0	0	0.0966332	0	0	0	0	0	0	0	0	0	0	0	0
AC007218.2	0	0	0	0	0	0	0	0	0	0	0	0	0	0	0	0	0	0	0	0	0	0	0	0	0	0	0	0
AC007220.1	0.0249404	0	0.0439308	0	0.000427441	0	0	0	0.0444416	0.0847576	0.0908166	0.031738	0	0.0535868	-0.44625	-0.454412	-0.384225	-0.331052	-0.33642	0	0	0	0	0.0256969	0	0.0283192	0.25777	0
AC007221.1	0	0	0	0	0	0	0	0	0	0	0	0	0	0.0230404	0	0	0	0	0	0	0	0	0	0.0362936	0	0.0351268	0	0
AC007221.2	0	0	0	0	0	0	0	0	0	0	0	0	0	0	0	0	0	0	0	0	0	0	0	0	0	0.0310959	0	0
AC007228.2	-0.0339368	0.0281068	0.0054915	0.0872208	0.0144883	-0.052064	-0.112677	-0.157308	-0.144502	-0.00207609	-0.0343014	-0.102509	-0.0118485	-0.0057231	0.181108	0.114067	0.168551	-0.0231809	0.0544375	0.0464342	0.00656561	-0.0697782	0.0820573	0.0481741	-0.000931254	-0.0612461	-0.0371181	-0.0455386
AC007240.1	-0.304651	-0.53415	-0.312487	-0.510554	-0.330933	-0.369663	-0.483464	-0.531708	-0.512278	-0.542793	-0.527927	-0.666664	-0.703895	-0.737507	-0.403538	-0.448528	-0.316491	-0.37299	-0.420454	0.245685	0.198647	0.100086	-0.0800447	-0.220968	-0.315085	-0.199251	-0.358374	-0.436255
AC007249.1	0.201035	0.0867025	0.193293	0.245973	0.0242595	-0.171771	0.0182859	0.143615	-0.0958569	0.187042	0.269313	-0.061803	0.675506	0.515027	0.249112	0.238404	-0.0229593	0.421388	0.228059	-0.049272	0.0500044	0.196243	-0.192833	0.155217	0.243284	0.198835	0.445007	0.0112364
AC007249.2	-0.141221	-0.0531444	-0.217837	-0.210912	-0.116814	0.0278743	-0.0302636	0.11958	0.0785074	0.189346	0.114394	0.11511	0.593809	0.746982	0.502117	0.193218	-0.038652	0.451476	0.41742	0.281195	0.384153	0.327878	0.449897	0.408437	0.0750945	0.161777	0.371369	0.401792
AC007250.1	0.462265	-0.0850928	-0.203957	-0.080116	0.233217	0.310326	-0.011319	0.124045	0.0911603	-0.119764	-0.00228475	-0.119764	-0.0346589	-0.0438457	0	0	0	0	0	-0.327185	-0.421716	-0.265122	-0.0385838	-0.0254275	-0.421716	-0.421716	-0.421716	-0.421716
AC007255.1	-0.0185591	-0.0392057	-0.0392057	-0.0185621	-0.0392057	0	0	0	0	0.0127475	0.0225711	0	0	0	0	0	0	0	0	0.0387733	0	0.042349	0	0.0298281	0	0.0391098	0.0746147	0.0284065
AC007262.2	0.121547	0.173011	0.1238	0.061415	-0.0726016	0.0760182	0.214838	0.0560708	0.0210961	0.0475904	0.0294546	0.0413988	0.0843071	0.2394	0.23623	0.17842	0.290486	0.141767	0.280995	0.173432	0.0646588	0.122317	0.190811	0.150736	0.154724	0.207023	0.124133	0.00214601
AC007271.1	0	0	0	0	0	0	0	0	0	0	0	0	0	0.0625914	0	0	0	0	0	0	0	0	0	0	0.151174	0	0	0
AC007272.1	0.0621569	0.0112456	0.000157731	0.0067246	-1.5004e-05	0	0	0.0347226	0	0	0	0.0255246	0	0	0.202603	-0.0214251	0.177684	-0.0615757	-0.110881	0.00740997	0.00555799	0.0173989	-0.00675755	0.0178264	-0.00778289	-0.00776695	-0.00778289	0.0152016
AC007277.1	0	0	0.00954917	0.00892068	0	0	0	0	0	0.00838753	0	0.0138608	0	0.00578769	0	9.68e-06	0	9.55e-05	0.00549462	0	0	0	0.011424	0	0	0	0	0
AC007285.1	-0.063826	-0.016876	0.29117	-0.0907224	0.0813602	0.215523	0.256608	0.232719	-0.107916	0.0923178	0.0449919	0.0918176	0.0593134	-0.0619167	-0.285213	-0.0771172	-0.107709	0.110269	-0.0114752	0.162999	0.157156	0.172237	-0.0497776	0.252219	0.157457	0.0766868	0.569748	-0.0723642
AC007285.2	0	0	0	0	0	0	0	0	0	0	0	0	0	0	-0.0194836	-0.142444	-0.123437	-0.274594	-0.0184862	0	0	0	0	0	0	0	0	0
AC007292.1	0.116908	-0.134993	-0.0838881	-0.185291	-0.0532171	0.172543	0.00455305	-0.105557	0.0415238	-0.163174	-0.252645	0.0695978	-0.284937	-0.322226	-0.125861	0.21544	0.196464	0.0272194	-0.121341	-0.0527544	-0.0334911	0.0531436	-0.0369621	-0.13319	0.0621222	0.138706	0.143965	-0.129396
AC007292.2	0.0372526	-0.0165208	-0.0271887	-0.00555358	-0.00435621	-0.00300392	0.00713399	-0.0444426	-0.0284805	-0.0275047	-0.0333237	-0.0433193	-0.0568298	-0.017784	0.193748	0.0939231	0.148865	0.0739873	-0.00534038	-0.00494888	-0.0298697	-0.0181312	-0.0568284	-0.023824	-0.0395649	-0.0442917	0.0280705	-0.0327342
AC007292.3	0	0.122155	0	0	0.120873	0	0	0	0	0.0809736	0	0	0	0	0.169276	0.21431	0.261847	2.48e-05	7.24e-05	0.169565	0.238561	0	4.97e-08	0.149027	0	0.217725	0	0
AC007298.1	0	0	0	0	0	0	0	0	0	0	0	0	0	0	0	0.000337878	0.000106012	0	0.000101412	0	0	0	0	0	0	0	0	0
AC007298.2	0	0	0	0	0.0573666	0	0	0	0.0281908	0	0.0291172	0	0.0221693	0	0.00300056	0.00217114	0.00455676	0.00131831	0.0035486	0.0821413	0.115327	0.0992902	0.156773	0.0328419	0.0635872	0	0	0.101508
AC007308.1	0	0	0	0	0	-0.191947	-0.191947	-0.191947	0.0703691	-0.11875	-0.0868819	-0.191947	-0.123404	-0.191947	0.000171202	-6.25e-05	8.1e-05	-2.75e-06	0.000108752	0	0	0.121825	0.130915	0	0	0.105814	0	0.122699
AC007314.1	0.0698118	-0.0440949	0.00760295	0.0595921	0.0589922	0	0	0.0457451	0	0	0	0	0	0	0.119265	0.339462	0.000667274	0.00290683	0.00162415	0	0	0	0.0697425	0	0	0	0	0
AC007319.1	-0.086325	-0.0786168	0.118509	-0.036622	-0.0106028	-1.05401	-0.708452	-1.142	-0.572514	-0.542066	-0.523356	0.142799	-0.398734	-0.06835	-0.894947	-0.236709	-0.63558	-0.259113	-0.647859	-0.201128	-0.440191	-0.253548	-0.279782	0.546472	-0.187494	0.639754	0.0499082	0.545482
AC007325.1	0.00177266	-0.0108879	-0.0108879	-0.00613585	-0.0065348	0	0	0.00778095	0.0451591	0	0.0088892	0.0312542	2.42095	5.24383	0.060601	0.0222503	0.0392538	-0.0326484	0.0630219	-0.0155152	0.00811358	-0.0183766	-0.0166201	-0.0182706	0.0176285	-0.00220784	-0.0106703	0.0168934
AC007325.2	0.0042271	0.011849	0	0.00927289	0.0118869	0	0	0.0676879	0	0	0	0.00892015	0.0340906	0.0425522	0.0369867	0.00165079	0.0309015	0.0108	0.15596	0	0	0.00388924	0.00455465	0	0.0688267	0	0.0597103	0.0148496
AC007325.4	0.127579	0.255171	-0.0543229	-0.113146	0.173944	0.0325351	0.546382	0.887882	0.65325	0.0751846	0.0770203	1.31236	2.03673	2.21613	0.24423	0.18155	1.00225	0.573154	1.05607	-0.371291	-0.0306828	-0.175344	-0.174416	-0.200778	-0.423893	-0.302257	0.483094	0.143755
AC007326.2	0.0029649	0.00779345	-2.06304e-05	-2.06304e-05	0.00491295	-0.0731215	-0.0740822	-0.0737556	-0.0710909	-0.0721041	-0.0764546	-0.0711195	-0.0700971	-0.0764546	0.00212758	-0.00302461	-0.00142158	-0.0261357	-0.0261357	-0.0109727	-0.0109727	0.000960892	-0.0109727	-0.0078967	0.00816872	-0.00417369	-0.00725837	-0.0109727
AC007326.4	0.193501	0.137294	0.293374	0.164155	0.11577	0.26844	0.356124	0.111882	0.378175	0.145938	0.123887	0.263243	0.0220597	0.0138233	0.266159	0.218831	0.000953368	0.112006	-0.0369445	0.137382	0.378846	0.378128	0.39145	0.382741	0.106219	0.231465	0.196758	0.37284
AC007327.2	0	0	0	0	0	0	0	0	0	0	0	0	0	0	0	0	0	0	0	0	0	0	0	0	0	0	0	0
AC007333.1	0	0	0	0	0	0	0	0	0	0	0	0	0	0	0	0	0	0	0	0	0	0	0	0	0	0	0	0
AC007333.2	-0.0678092	-0.19206	-0.0719088	-0.200032	-0.187	-0.198093	-0.0160163	-0.198093	-0.0053775	-0.0145963	0.0158142	-0.0651301	0.23887	-0.0321076	0.502946	0.75829	0.25475	-0.00198637	0.219696	0.26051	0.158867	0.0882057	0.267938	0.197589	0.0368834	0.449655	0.0263718	0.0755269
AC007336.1	0.0118699	0.0109707	0.0323292	0.00130008	0.00611657	-0.0381528	0.00338412	0.0181574	-0.0283179	-0.0230635	-0.036117	-0.00198679	-0.0376364	-0.0377375	0.0113691	-0.0761783	-0.0135729	-0.0311139	0.0535467	-0.053934	-0.0277525	-0.0530683	-0.0587165	-0.0460911	0.00417725	-0.0160653	0.00211349	-0.00825904
AC007336.2	0	0	0	0	0	0	0	0	0	0	0	0	0	0	0	0	0	0	0	0	0	0	0	0	0	0	0	0
AC007342.4	0.126323	-0.108126	0.093104	0.0598467	-0.130186	-0.0550297	0.141414	0.184794	0.209496	0.0404554	0.0319029	0.190377	0.103377	0.120466	-0.0776756	-0.0844714	-0.397399	-0.600594	-0.0510074	0.0543556	-0.196289	0.0369655	-0.193822	-0.0834986	-0.246572	0.0135218	-0.0134882	-0.160081
AC007342.5	0	0.00991363	0	0	0	0	0	0	0	0	0	0	0	0	-0.0311916	0.0276902	-0.0311916	-0.0311916	-0.0311916	-0.00967825	-0.00967825	0.0126234	0.0184752	-0.00967825	-0.00967825	-0.00967825	-0.00967825	-0.00967825
AC007344.1	0	0	0	0	0	0	0	0.0121112	0	0	0	0	0	0	0.00143293	0.0715974	0.0392308	-0.000894569	-0.000894569	0	0	0	0	0	0	0	0	0
AC007347.1	0	0	0	0	0	0	0	0	0	0	0	0	0	0	-0.441788	-0.441788	-0.0988114	-0.441788	-0.441788	0	0	0	0	0	0	0	0	0
AC007349.1	0	0	0	0	0	0	0	0	0	0	0	0	0	0	0	0	0	0	0	0	0	0	0	0	0	0	0	0
AC007349.2	0	0	0	0	0	0	0	0	0	0	0	0	0	0	0	0	0	0	0	0	0	0	0	0	0	0	0	0
AC007349.3	0	0	0	0	0	0	0	0	0	0	0	0	0	0	0	0	0	0	0	0	0	0	0	0	0	0	0	0
AC007349.4	0	0	0	0	0	0	0	0	0	0	0	0	0	0	0	0	0	0	0	0	0	0	0	0	0	0	0	0
AC007359.1	0	0	0	0	0	0	0	0	0	0	0	0	0	0	0	0.000219727	0	0	0	-0.0144409	-0.0144409	-0.0144409	-0.0144409	-0.0144409	-0.0144409	-0.0144409	-0.0144409	-0.0144409
AC007362.1	0	0	0	0	0.0527027	0	0	0	0	0	0	0	0	0	0.0673256	0.237991	-0.10409	-0.235497	0.0642142	0	0.0826498	0.058907	0	0	0	0	0	0
AC007364.1	0.0677999	-0.0372042	0.110002	0.104137	0.0611018	-0.161491	-0.0687402	-0.0133513	0.0160121	-0.0392043	-0.0567777	0.223247	0.352857	0.557117	-0.053852	-0.123161	-0.196658	-0.117175	0.290421	0.012078	0.149087	0.161396	0.0390018	0.17584	0.0952044	0.0307439	0.4306	0.332637
AC007365.1	-0.0650849	-0.109897	-0.0627906	-0.0685092	-0.109897	-0.042771	0.0748619	0.124601	-0.042771	-0.042771	-0.042771	0.167601	0.118167	-0.0116708	-0.408475	-0.408475	-0.206426	-0.0849312	-0.190317	0.0925316	-0.0527301	0.0466846	-0.0615441	0.0331825	-0.048653	-0.122042	-0.0099741	0.0355273
AC007368.2	0	0	0	0	0	0	0	0	0	0	0	0	0	0	0	0	0.066422	0	0	0	0	0	0	0	0	0	0	0
AC007370.1	0	0	0	0	0	0	0	0	0	0	0	0	0	0	0	3.34e-05	0	0	4.01e-05	0	0	0	0	0	0	0.154299	0	0
AC007370.2	-0.0064813	-0.0064813	-0.0064813	-0.0064813	-0.0064813	0	0	0	0	0	0	0	0	0	0	0	0	0	0	0	0	0	0	0	0	0	0	0.00821582
AC007375.2	0.000805316	0.00154579	-0.00028941	0.0010043	0.000673087	0	0	0	0	0	0	0	0	0	-0.00341455	0.00255301	-0.00406843	-0.00271869	0.000754682	0.000149453	0.00224659	0.000850951	0.00152122	0.000952714	0.00539697	0.00039263	0.000566246	0.00085606
AC007375.3	0	0	0	0	0	0	0	0	0	0	0	0	0	0	0	0	0	0	0	0	0	0	0	0	0	0	0	0
AC007376.2	0	0	0	0	0	0	0	0.0573113	0	0	0	0	0	0	0	0.125369	0	0	0	-0.0771733	-0.0771733	-0.0771733	-0.0771733	-0.0771733	0.0942281	-0.0771733	-0.0771733	0.0480111
AC007378.1	0	0	0	0	0	0	0	0.352667	0.0645747	0	0	0	0.0506597	0	-8.55e-06	0.179993	0.00010038	0.000106852	-3.02e-06	-0.00568075	-0.102923	-0.102923	-0.102923	-0.0189304	0.0342229	-0.0229023	-0.102923	-0.102923
AC007381.1	0	0	0	0	0	0	0	0	0	0	0	0	0	0	0	0	0	0	0	0	0	0	0	0	0	0	0	0
AC007383.2	0.539096	0.328554	0.147651	0.195662	-0.0546124	-0.0212636	-0.0352775	0.168613	0.00817265	0.220916	0.240368	0.174153	0.364662	0.139554	-0.241769	-0.146836	0.184471	-0.00408688	0.319556	-0.0155909	0.0238064	0.425133	0.254502	0.0888903	0.117901	0.42841	0.562902	0.50985
AC007383.3	0.0216903	-0.0133424	0.00309579	0.00183325	-0.0133424	0	0.0293809	0.0777529	0.012711	0	0	0.232639	0.013475	0	0.043935	0.053651	0.00727939	0.000168139	0.00235458	-0.00428872	0.00280136	-0.0183243	0.0432866	-0.00509749	0.107437	0.0143962	-0.0194463	-0.0227499
AC007384.1	-0.0288247	0.00403131	0.0481701	0.121234	0.113744	-0.0419445	-0.103971	-0.0409699	0.102405	0.0204396	-0.0663042	0.107869	-0.00651697	-0.13107	-0.00115154	0.102758	0.0969887	-0.00635396	0.167748	0.000360838	0.0527322	0.0482469	0.133244	0.122588	0.169002	0	0.332858	0.0491009
AC007388.1	0.053806	0.214298	0.288222	0.237868	0.0980449	-0.16179	0.103496	0.164088	0.153896	0.647268	0.472544	0.950004	1.0864	0.603546	0.192101	0.371941	0.45233	0.378779	0.797444	-0.0395261	0.0811348	0.16357	0.338346	0.481541	0.553877	0.554898	1.16147	0.864029
AC007389.3	0.00750529	0.0699267	0.0315984	-0.0558404	-0.0156995	0.00891698	0.0211692	0.0506546	-0.000280235	0.0021006	-0.0227725	0.01889	-0.0072403	-0.00299451	-0.117872	-0.000229976	-0.0553427	-0.0844101	-0.0903485	0.0364043	0.0797715	0.0460854	0.0999941	0.0299645	0.0569033	0.0834244	0.0753392	0.0300462
AC007389.5	0	0.068373	0	0.161255	0.161529	-0.0214702	0.0599352	-0.0293675	-0.0108004	-0.0369067	-0.027863	-0.0259943	0.298063	0.267713	-0.00140103	0.0705937	-0.00237125	-0.0931261	0.0750516	-0.166773	-0.209178	-0.209178	-0.169275	-0.163264	-0.150342	-0.0169062	-0.0552111	-0.0875661
AC007391.1	-0.0527247	-0.0527247	-0.0527247	0.0156893	-0.0527247	0	0.0556185	0.0636545	0.11542	0.0891961	0	0	0	0.0703156	0	0	0.155796	0.285345	0.136979	0.0495653	0.230106	0.142201	0.186866	0.42327	0	0	0.0949837	0.210521
AC007402.1	0	0.00494007	0.00530196	0	0.00497511	0.00656261	0.00467653	0	0	0.00414297	0.0052551	0	0	0.029069	0.0435655	0.0271252	0.0605349	0.0171258	0.0291064	0.00835664	0.00850275	0	0.00749548	9.32e-06	0.0181922	0	0.00876164	0
AC007403.1	0	0	0	0	0	0	0	0.0870756	0	0	0	0	0	0	-0.101772	-0.10252	0.0972674	-0.10252	0.0152019	0	0	0	0.0574553	0	0	0	0	0
AC007405.1	-0.759892	-0.714685	0.515697	-0.0484158	-0.0272241	0.0359526	0.0405987	0.587641	0.0853169	0.0372035	0.0210206	0.0802503	0.0256098	0.173794	-1.26618	-0.956058	-1.20725	-1.10883	-1.02717	0.0443978	0.0491818	0.0530993	0.0781216	0.16153	-0.0224158	-0.0398084	0.146361	0.090196
AC007405.2	0	0	0	0	0	0	0	0	0	0	0	0	0	0.0379221	0	0	0	0	0	0	0	0	0	0	0	0	0	0
AC007405.3	0.10123	-0.0801494	-0.218359	-0.0916458	-0.137871	-0.27662	0.14609	0.219604	0.246619	-0.173748	-0.0444911	0.555958	0.395262	1.88896	0.213894	0.342267	0.395954	0.560972	1.29088	0.0836829	0.314625	0.0476267	0.0101801	0.0408326	0.392431	0.268246	1.87135	0.237474
AC007406.1	0	0	0	0	0	0	0	0	0	0	0	0	0	0	0	0	0	0	0	0	0	0	0	0	0	0	0	0
AC007406.3	-0.0373196	-0.0373196	-0.0150642	0.00467489	0.00647536	0.0225857	0.0396376	0.0217074	0.0469875	0.102612	0.0940912	0.0517984	0.0318568	0.0268941	-0.00693483	0.167209	0.00306951	-0.000638148	0.114416	0.00563559	-0.0670628	-0.00136804	-0.0670628	0.0427756	-0.0670628	-0.0395556	-0.0670628	-0.0670628
AC007406.4	0	0	0	0	0	0	0	0	0	0	0	0	0	0	0	0	0	0	0	0	0	0	0	0	0	0	0	0
AC007422.1	0	0	0	0	0	0	0	0	0	0.0181646	0	0.0217657	0.0164292	0.025551	-0.114923	-0.179264	-0.0589785	-0.0544617	-0.054149	0	0	0	0	0	0	0	0	0
AC007422.2	-0.560545	-0.492514	-1.41605	-0.313523	0.139975	1.09297	-0.0495314	-0.697195	-0.395831	0.102976	-0.333851	-0.31267	0.23627	-0.635801	-1.19484	-1.81042	-1.81042	-1.81042	-1.18745	0.250509	0.44081	-0.172878	-0.324622	-0.353616	-1.84223	-0.963314	-1.84223	-0.890166
AC007423.1	0	0.0450169	0.0442937	0.0413877	0	0.45732	0	0	0.120761	0.0342047	0	0.525621	0.0645374	0.0523566	0.291507	0.228673	0.111559	0	0.103397	0	0	0	0	0	0	0	0.0702007	0
AC007431.1	0	0	0	0	0	0	0	0	0	0	0	0	0	0	0	0	0	0	0.0454437	0	0	0	0	0	0	0	0	0
AC007431.2	0	0	0	0	0	0	0	0	0	0	0	0	0	0	0	0	0	0	0	0	0	0	0	0	0	0	0	0
AC007448.2	0	0	0	0	0	0	0	0	0	0	0	0	0	0	0	0	0	0	0	0	0	0	0	0	0	0	0	0
AC007448.3	-0.0367315	-0.0103385	-0.0457642	-0.0464778	-0.120302	0.220159	0.296362	0.160393	-0.0536385	0.0236694	-0.0988131	0.411419	0.0819127	0.0774428	0.258464	0.677239	0.698001	0.648679	0.573684	0.00763232	0.254959	0.163612	0.093616	0.152942	0.26978	0.140744	0.146138	0.0545073
AC007450.1	0	0	0	0	0	0	0	0	0	0	0	0	0	0	0	0	0	0	0	0	0	0	0	0	0	0	0	0
AC007463.1	0	0	0	0	0	0	0	0	0	0	0	0	0	0	0	0	0	0	0	0	0	0	0	0	0	0	0	0
AC007485.1	0	0.322337	0	0	0	0.199042	0.25744	0	0	0.193669	0	0	0	0	-0.521258	-0.521258	-0.521258	0.443717	-0.521258	-0.431634	-0.431634	-0.431634	-0.431634	-0.431634	-0.431634	-0.431634	-0.431634	-0.431634
AC007491.1	0.0130685	0	0	0	0	0	0	0	0	0	0	0	0	0	0	0	0	0	0	0	0	0	0	0	0	0	0	0
AC007493.1	0.00711374	-6.14128e-05	-6.14128e-05	3.60183e-05	-6.14128e-05	-0.00654718	-0.00654718	-0.00654718	-0.00654718	-0.00654718	-0.00654718	-0.00654718	-0.00654718	-0.00654718	-0.0565695	-0.0616016	-0.0618344	-0.0601979	-0.0561862	-0.0121361	-0.00188752	-0.0135739	-0.000299502	-0.0136153	-0.0134585	0.0037888	-0.0136153	-0.00618695
AC007493.2	0	0	0	0	0	0	0	0.0685856	0	0	0	0	0	0	0	0	0	0	0	0	0	0	0	0	0	0	0	0.068417
AC007494.2	-0.000336656	-0.000336656	-0.000336656	-0.000336656	-0.000336656	0	0.031736	0	0	0	0	0	0.0228822	0	-0.00123464	0.00136762	0.0926584	0.0825146	0.0831762	0	0	0	0	0	0	0.0419993	0.0457827	0
AC007495.1	0.0381449	0.126104	0.0471137	0.177893	0.00392059	-0.0215804	-0.0222041	0.0500189	0.000244156	-0.0235459	-0.036302	-0.0155524	0.00207308	-0.0322904	0.0432344	0.0318209	0.0763021	0.0498803	0.260262	0.150868	0.163429	0.0106906	0.145501	0.0459985	0.0179324	0.00880026	0.053867	0.099686
AC007495.2	0	0	0	0	0	0	0	0	0	0	0	0	0	0	0	0	0	0	0	0	0	0	0	0	0	0	0	0
AC007496.1	0	0	0	0	0	0	0	0	0	0	0	0	0	0	0.0860709	0.0855648	0.0914838	0.175084	0.0850005	0	0	0	0	0	0	0	0	0
AC007496.2	2.92386e-06	0.0601115	0.0580495	0	0	0	0	0	0.0526171	0	0	0	0	0.0255317	-0.435838	-0.836446	-0.838538	-1.02547	-0.899441	-2.65e-05	0.0814512	-2.65e-05	-2.65e-05	0.0690883	-2.65e-05	-2.65e-05	-2.65e-05	-2.62e-05
AC007513.1	0	0	0	0	0	0	0	0	0	0.183623	0.097087	0	0.0711767	0	0	0	0	0.205711	0.342411	0	0	0.186568	0	0.120526	0.152991	0	0.146807	0
AC007527.2	0	0	0	0	0	0	0	0	0	0	0	0	0	0	0	0	0	0	0	0	0	0	0	0	0	0	0	0
AC007529.1	0.0274203	0.0307435	0.0195437	0.0178851	0	0	0.00882659	0.00866499	0.00780278	0.0243206	0.0105105	0.013937	0.0290582	0	-0.0157775	-0.0437743	-0.0107539	-0.0152991	-0.042411	-0.00784725	-0.00720841	0.0324402	-0.0234669	-0.0234669	0.0113361	-0.0124788	-0.0234669	-0.0131342
AC007529.2	-0.118369	-0.138715	-0.0763529	-0.0592317	-0.0257362	-0.0209264	0.121366	-0.00674575	-0.12604	-0.00298073	-0.0600657	-0.0529461	-0.0827468	-0.114661	-0.137739	-0.0680783	-0.189717	-0.134317	-0.189717	-0.0894355	-0.0817606	-0.0143482	-0.0856298	0.0201043	0.00337304	-0.0630953	0.0184919	-0.0120049
AC007533.1	0	0	0	0	0	0	0	0	0	0	0	0	0	0	0	0	0	0	0	0	0	0	0	0	0	0	0	0
AC007540.1	0	0.0622788	0	0	0	0	0	0	0	0	0	0	0	0	0	0	0	0	0	0	0	0	0	0	0	0	0	0
AC007541.1	-0.015937	-0.182243	-0.0975231	-0.0401596	-0.190437	0.0834409	0.0853242	0.052608	0.227026	0.0352338	0.00582706	-0.0770713	-0.0388276	0.0541097	-0.042821	-0.148916	0.0579275	0.266745	0.270155	0.0680504	0.278614	0.211122	0.0911263	0.0427283	0.0652423	0.0163882	0.0306861	-0.193917
AC007552.2	-0.205352	0.0271353	0.158793	-0.203869	-0.254196	0.198743	0.0550787	-0.1319	-0.0781505	-0.121651	-0.0209285	-0.228883	-0.194237	0.012467	0.229243	-0.423143	-0.532429	-0.305754	-0.423477	-0.134651	-0.00377595	0.338344	-0.0979479	0.0717944	0.084233	-0.0320373	0.0640615	-0.0327541
AC007556.1	0	0	0	0	0	0	0	0	0	0	0	0	0	0	0	0	0	0	0	0	0	0	0	0	0	0	0	0
AC007557.1	0	0	0	0	0	0	0	0	0	0	0	0	0	0	0	0	0	0	0	0	0	0	0	0	0	0	0	0
AC007557.2	0	0	0	0	0	0	0	0	0	0	0	0	0	0	0	0	0	0	0	0	0	0	0	0	0	0	0	0
AC007557.3	0	0	0	0	0	0	0	0	0	0	0	0	0	0	0	0	0	0	0	0	0	0	0	0	0	0	0	0
AC007557.4	0	0	0	0	0	0	0	0	0	0	0	0	0	0	0	0	0.192298	0	0	0	0	0	0	0	0	0	0	0
AC007563.1	-0.0325153	0.0103103	-0.0325153	-0.0325153	-0.0325153	0	0	0	0	0.0313135	0	0.428238	0	0.0218198	0	0	0.181862	0	0.194591	0	0	0.150901	0	0.0534903	0	0.0479745	0	0.0866512
AC007563.2	-0.0718357	-0.0698745	-0.0683033	-0.0687704	-0.12188	0.0361584	0.236618	0.0473612	0.0429076	0.105707	0.686506	0.183755	0.495181	0.0780618	0.189571	0.149444	-0.000173171	-0.000554479	0.706883	-0.0911483	-0.17433	0.0018934	-0.17433	0.00679292	0.136463	-0.116931	-0.0477207	-0.111539
AC007566.1	0.197499	0.0609001	0.106601	0.0894876	-0.263025	0.755699	0.527924	0.34474	0.236182	0.483202	0.432022	0.72169	0.879322	0.328712	-0.224478	-0.210658	0.103007	-0.248496	0.237672	0.356725	0.0129736	0.622942	0.687391	0.711354	1.02634	0.815313	1.54247	1.04964
AC007569.1	0	0	0	0.044148	0	0	0	0	0	0	0	0.0657447	0.0310888	0	1.73314	1.27686	0.810661	1.36107	1.56875	0	0	0.175558	0	0	0	0	0	0
AC007570.1	-0.00250471	-0.176092	-0.0874577	0.0394779	-0.0452858	0.0318608	-0.0733539	-0.367313	-0.223772	-0.13378	-0.138707	-0.00518889	-0.25129	-0.357164	-0.309291	-0.280914	-0.297917	-0.414977	-0.414977	0.0644471	0.281374	0.267855	0.0247595	0.392964	-0.0467761	0.0690199	0.0168622	0.0164653
AC007595.1	0	0	0	0	0	0	0	0	0	0	0	0	0	0	0	0	0	0	0	0	0	0	0	0	0	0	0	0
AC007598.2	0	0	0	0	0	0	0	0	0	0	0	0	0	0	0	0	0	0	0	0	0	0	0	0	0	0	0	0
AC007601.1	0	0.000128876	0.01067	0	0.0028856	0.01376	0	0	0.00869586	0.00858652	0	0	0	0	0.0575749	-0.000324122	0.00139029	0.0270773	0.120206	0	0.000174077	0	9.18e-06	0.000135846	0.0017621	0.0397549	0.000480689	0.0249316
AC007601.2	0	0	0	0	0	0	0	0	0	0	0	0	0	0	0	0	0	0	0	0	0	0	0	0.0682677	0	0	0	0
AC007603.1	-0.00598634	-0.0254564	-0.00544206	-0.0254564	-0.0152913	0.0154921	-0.0106328	6.63e-05	0.00759209	0.0320083	0.0447588	-0.0106328	-0.00331423	0.00234761	-0.0659562	-0.0477084	-0.0439394	-0.0403732	-0.0179502	-0.0163507	0.000689712	0.010623	-0.0163179	0.0123889	0.00716458	-0.0163507	-0.00202424	-0.0163507
AC007608.1	0	0	0	0.00806655	0	0	0.00769436	0	0	0	0	0	0	0	-0.0746264	-0.0761676	-0.0421662	-0.0975029	-0.0841735	7.89e-05	0	0	9.65e-05	0.000136235	0	0.000695293	0.00227473	0
AC007608.2	0	0	0	0	0	0	0	0	0	0	0	0	0	0	0	0	0	0	0	0	0	0	0	0	0	0	0	0
AC007608.3	0	0	0	0	0	0	0	0	0	0	0	0	0	0	0	0	0	0.0106907	0	0	0	0	0	0	0	0	0	0
AC007610.1	0	0.0640969	0.123262	0	0	0.467481	0.200241	0.219183	0.17569	0	0.129169	0.0705719	0.0478437	0.0336835	0.309186	0.128652	0.000164225	0.000358068	-0.000182042	0.100469	0.0057227	-0.0872152	-0.0872152	0.060939	0.0137403	0.0526206	0.00943401	0.0491387
AC007610.2	-0.0410065	-0.0410065	-0.0410065	-0.0410065	-0.0410065	-0.0117026	-0.0391677	0.00318855	-0.0391677	-0.0391677	-0.0391677	-0.0391677	-0.0391677	-0.0391677	0.193593	0.125889	-0.0827693	0.0995365	-0.0827693	0	0	0.0519337	0	0	0	0	0	0.0484909
AC007611.1	0.0691892	0.0395972	0.287721	0.0333892	-0.131289	-0.0421292	-0.0842966	-0.132002	-0.136708	-0.438531	-0.460389	-0.518899	-0.494583	-0.400953	-0.0288817	-0.0675672	0.0134332	0.276119	-0.0574152	-0.0750204	0.204845	0.0845665	0.255899	0.291792	0.621114	0.599676	1.18457	0.937093
AC007613.1	0.113001	0.0697082	0.0178269	0.01554	-0.0393821	-0.0655252	-0.0506251	-0.0573432	0.00648017	-0.0448103	-0.0356421	-0.0374924	-0.0430593	-0.0241325	0.0384197	-0.0461617	-0.0283556	0.140473	0.0746173	0.0494906	-0.00475729	0.0641773	0.0385784	-0.0109257	0.0258374	0.0483369	0.256233	0.0240103
AC007614.1	0	0	0	0	0	0	0	0	0	0	0	0	0	0	0	0	0	0.0333713	0	0	0	0	0	0	0	0	0	0
AC007619.1	-0.141856	-0.0537982	-0.0487954	-0.141856	-0.141856	-0.0917794	-0.0142431	-0.0917794	0.0637732	-0.0337738	-0.00715497	0.0236877	-0.029006	0.138245	-0.0317392	-0.0467682	-0.211441	0.295045	-0.211441	0.0987432	0.226904	0.10408	0	0.111732	0	0.166054	0.239407	0.0983933
AC007620.2	0.0297395	-0.0498225	0.0496321	-0.0270387	0.0590202	-0.229553	-0.0148899	-0.20496	0.0829718	-0.244957	-0.191635	-0.161621	-0.327279	-0.402461	-0.0358002	-0.137358	-0.132974	-0.033562	-0.135632	0.259496	0.212183	0.377856	0.154387	0.114735	-0.0648797	0.0168325	0.0860067	-0.0728385
AC007620.3	0.084585	0.197539	0.00922582	0.07602	-0.0539246	0.189734	0.115421	0	0.0504535	0.0909432	0	0.0707954	0.0449817	0.0717103	-0.0406872	-0.052863	0.0449166	-0.135361	0.0523406	-0.187622	-0.0944142	-0.187622	0.18731	-0.118315	-0.187622	0.150761	-0.187622	-0.0508815
AC007622.2	0	0	0	0	0.0250413	-0.173467	-0.173467	-0.127453	-0.173467	-0.159455	-0.173467	-0.173467	-0.173467	-0.173467	0.0198782	-0.158622	-0.291346	-0.292155	-0.267177	0	0	0.0191296	0.0244307	0.0177019	0	0	0	0
AC007631.1	0	0	0	0	0	0	0	0	0	0	0	0	0	0	0	0	0	0	0	0	0	0	0	0	0	0	0	0
AC007638.1	0.000957584	-0.000408357	-0.000408357	-0.000408357	-0.000408357	0	0	0	0	0.0102496	0	0	0	0.0165926	-0.000150172	-0.000150978	0.0368821	0.0463572	0.0357288	0.000287777	0.0210707	0	0	2.97e-05	0	0	0	0.000244102
AC007638.2	0.0123862	0	0	0.0119113	0	0.00406932	-0.0117579	-0.0117579	-0.0117579	-0.0010163	-0.0117579	0.221704	0.00892824	0.0040327	-0.0352582	-0.0323201	-0.0310914	-0.0350472	-0.0283161	0.0140678	-0.012179	-0.012179	-0.012179	-0.012179	-0.012179	-0.012179	0.00528003	-0.012179
AC007639.1	0	0	0	0	0	0.0202866	0	0	0	0.0475686	0.0263273	0	0.0247191	0.0148472	0	0	0	0	0	-0.0223766	-0.0474374	0.0347659	-0.0474374	0.029249	-0.0474374	-0.0474374	-0.0474374	-0.0474374
AC007652.1	0	0	0	0	0	0	0	0	0	0	0	0	0	0	0	0	0	0	0	0	0	0	0	0	0	0	0	0
AC007655.1	0	0	0	0	0	0.132273	0	0	0	0	0	0	0	0	0	0	0	0	0	0	0	0	0	0	0	0	0	0
AC007656.1	0	0	0	0	0	0	0	0	0	0	0	0	0	0	0	0	0	0	0	0	0	0	0	0	0	0	0	0
AC007663.2	0.0037876	0.00472371	0.0046602	0.0103123	0.00879655	0.0622003	0.0649823	0.0083558	0.0522913	-0.00191636	0.024325	0.00371506	-0.00168066	-0.00500206	0.0793559	0.0685245	0.143797	0.181702	0.125734	-0.00552146	0.0393496	0.142873	0.0746345	0.0735188	0.110853	0.0705924	0.106046	0.0530024
AC007663.3	0.172027	0.219498	0.206256	0.32992	0.183001	0.0146126	-0.0207055	-0.194907	0.0930252	0.16687	0.142949	-0.291761	0.0223246	-0.0459656	0.414948	0.267103	0.463447	0.435942	0	0.463929	0.408808	0.237578	0.521174	0.0586779	0.343007	0.49777	0.612004	0.167599
AC007666.1	0.0515485	0.0136124	0.0866156	0.0455001	0.0126932	-0.0163497	0.0467978	0.0670735	0.0645768	-0.00810744	0.0724589	-0.0363644	0.062847	0.058217	-0.0523032	-0.0338625	0.295796	0.0901737	0.0626258	-0.00174081	0.0202297	0.0128416	0.0689669	0.0575661	-0.00130997	0.0326679	0.0696361	-0.0137321
AC007673.1	0	0	0	0	0	-0.0222925	-0.0222925	-0.0222925	-0.0222925	-0.0222925	-0.0222925	-0.0222925	-0.00445049	-0.0222925	0	0	0	0	0.0597453	0	0	0	0	0	0	0	0	0.0259786
AC007679.1	0	0	0	0	0	0	0	0	0	0	0.0286355	0	0	0	-0.0651308	-0.0684554	-0.0684554	-0.0675214	-0.067129	0	0	0	0.05901	0	0	0.035985	0	0
AC007681.1	0.0191357	0.036335	0.0113802	0.0369484	0.0372408	-0.0416609	-0.0311472	-0.01677	-0.0467811	-0.0411834	-0.0505474	-0.0468207	-0.0599288	-0.0467381	0.0922048	-0.00361375	0.0086233	-0.0331344	0.109727	0.0109428	-0.0427538	-0.0400917	0.000558592	0.0124297	-0.126092	-0.0430615	-0.0760322	-0.0691381
AC007686.2	0	0	0	0	0	0	0	0	0	0	0	0	0	0	0	0	0	0	0	0	0	0	0	0	0	0	0	0
AC007686.3	0.0810764	0.00671015	-0.0530327	0.0836899	-0.10333	0.0344252	0.10268	0.0548805	0.113724	0.071574	0.0578981	0.13033	0.38408	0.319315	0.027395	-0.0390276	0.130993	0.106756	0.49127	0.187358	0.151676	0.190781	0.188214	0.140401	0.222411	0.201179	0.219544	0.207857
AC007687.1	-0.126022	0.157178	-0.126022	-0.126022	-0.126022	0.0991266	0.127087	0	0	0.293511	0	0	0.186327	0.153547	0	0.329167	0	0	0	-0.0721146	0.11589	0.00896093	-0.346121	-0.346121	-0.346121	-0.346121	-0.139155	-0.0927448
AC007688.2	0	0	0	0	0	-0.102145	-0.102145	-0.102145	-0.102145	-0.102145	-0.102145	-0.102145	-0.102145	-0.102145	0	0.206771	0	0	0	0	0	0	0	0	0	0	0	0
AC007728.1	0	0	0	0	0	0	0	0	0	0	0	0	0	0	0	0	0.387904	0	0.235558	0	0	0	0	0	0	0	0	0
AC007728.2	-0.123098	-0.163159	-0.132168	-0.16806	-0.259299	0.353608	0.395673	0.342116	0.14266	0.0952601	0.136694	0.375624	0.0363004	0.544785	0.292122	0.601208	0.284923	0.426951	0.664751	0.206038	0.527548	0.502263	0.411823	0.28517	0.243084	0.292053	0.521936	0.364037
AC007731.1	-0.0114475	-0.0114475	-0.0114475	-0.0114475	-0.0114475	0	0.0109096	0	0	0	0.0124325	0	0	0	-0.00782347	-0.040419	0.0115123	-0.040419	-0.040419	0	0	0	0	0.00826929	0	0	0	0
AC007731.3	0.191176	0.377327	0.384803	0.99709	0.5475	-1.06168	-0.602831	-1.23222	-1.00976	-1.13683	-1.37806	-0.786297	-1.20417	-1.36325	-0.0380174	-0.375769	-0.375769	0.0793176	0.0670037	-0.0701039	-0.23531	0.504555	0.620218	0.559992	0.5615	0.316425	-0.237343	1.2681
AC007731.4	0	0	0	0	0	0	0	0	0	0	0	0.0585865	0	0	-0.0893713	-0.0971717	-0.0768633	-0.189359	-0.189359	0	0	0	0	0	0	0	0	0
AC007731.5	0.111353	-0.0727036	-0.0724363	-0.0731888	-0.0712562	0	0	0	0	0.0930259	0	0	0.0805093	0	-0.0162108	0.00334818	0.187551	0.00347876	-0.00893202	-0.0488276	-0.0465609	-0.0477079	0.0990657	-0.047465	-0.0443901	-0.0515446	-0.0337278	-0.0516591
AC007743.1	0.152408	0.0587998	0.0499468	0.0430708	-0.0164682	-0.0129813	-0.0154336	-0.0115107	0.0430293	0.0642447	0.0513268	0.0192278	0.0487195	0.0412579	-0.15322	-0.214828	-0.267681	0.0111173	-0.150616	0.0295716	0.0138534	0.0642599	0.117764	0.163497	0.0543747	0.0937245	-0.0460822	0.0186348
AC007749.1	0	0	0	0	0	0	0	0	0	0	0	0	0	0	0	0	0	0	0	0	0	0	0	0	0	0	0	0
AC007750.1	0.00661221	-0.00836527	-0.00822923	-0.00841758	-0.00329199	-0.00643909	-0.00527139	0.0198542	-0.0057898	-0.00975748	-0.00440504	0.00637656	0.0140221	-0.00975748	-0.114114	-0.23348	-0.132691	-0.124389	-0.157643	-0.0570182	-0.0312237	0.00190656	-0.0208924	-0.0156711	0.0386465	0.00561378	-0.0238493	-0.00206565
AC007773.1	-0.0939433	-0.170695	-0.203625	0.080752	0.0605012	-0.0266402	-0.0506058	0.0927336	0.0672115	0.165273	0.167205	0.265577	0.311725	0.169671	0.490136	0.442657	0.859978	0.449512	0.663733	0.244956	0.226452	0.00429257	-0.0140346	0.114796	0.472201	0.126733	0.407434	0.258777
AC007785.1	-0.0441515	-0.3017	-0.3017	-0.3017	-0.3017	1.14656	-0.0141474	-0.123766	0.209578	-0.038465	-0.123766	-0.123766	-0.0361935	-0.00675298	0.912615	0	0	0.247909	0	-0.0512811	0.108928	-0.190523	-0.190523	-0.190523	-0.00328776	-0.190523	-0.190523	-0.190523
AC007785.3	0.548661	0.577145	0.561687	0.511885	0.548801	0.0863073	-0.0461159	0.301697	0.0628686	0.328394	0.396414	0.823989	0.796644	0.459079	0.592051	0.127915	0.4516	0.476887	0.225916	-0.283762	-0.18201	-0.126485	0.0627788	-0.466316	-0.629289	0.0236992	0.101586	-0.0283247
AC007786.1	0.0204533	0.0154697	-0.0982546	0.149453	-0.0259713	-0.112066	0.0383955	-0.0900067	-0.184052	-0.102692	-0.144042	0.018054	-0.0319703	0.0615918	-0.363624	-0.197693	-0.259575	-0.363592	-0.199284	-0.0883567	-0.0306233	0.185323	0.118645	0.0771816	0.280451	0.124731	0.272521	0.00129064
AC007786.2	0	0	0	0	0	0	0	0	0.030885	0	0.0276114	0	0	0.0383249	0.0780792	0	0	0.0789705	0	0	0	0	0	0.0358935	0.0534886	0	0	0.0329705
AC007786.3	0	0	0	0	0	0	0	0	0	0	0	0	0	0.0332313	0	0	0	0	0	0	0	0	0	0	0	0	0.0751389	0
AC007787.1	0	0	0	0	0	0	0	0	0	0	0	0	0	0	0	0.0339865	0.0409199	0	0	0	0	0	0	0	0	0	0	0
AC007795.1	0	0	0	0	0	0	0	0	0	0	0	0	0	0	0	0	0	0	0	0	0	0	0	0	0	0	0	0
AC007823.1	-0.00873105	-0.0564702	-0.0601342	-0.0602064	-0.0120982	-0.0592817	0.0177086	0.0318691	0.0560646	-0.0222307	-0.00806342	0.0235227	-0.00605886	0.0945192	0.0552005	-0.0234446	0.18905	0.195452	0.0321434	0.0458414	0.0826623	0.0422491	0.0411393	-0.000768792	-0.0484405	0.203475	0.200886	0.129866
AC007834.1	-0.0889056	-0.0484312	-0.0889298	-0.0889687	-0.0889687	0.0128543	-0.0345334	-0.0345334	0.0295133	-0.0345334	-0.0345334	0.0060153	-0.0345334	-0.00881054	-0.0703391	-0.186706	-0.093577	-0.114854	-0.179926	0.085646	-1.52e-05	9.14e-06	7.2e-05	-3.09e-05	0.000345662	0.0446388	-3.09e-05	0.0806168
AC007846.1	0.0020679	-0.00285368	-0.00668298	-0.00620433	-0.00106877	0.011238	-0.0111113	0.00111634	-0.0111113	-0.0111113	-0.0111113	-0.0111113	-0.0111113	-0.0111113	-0.0531012	-0.00588692	-0.0537251	-0.0388591	-0.0633607	-0.00501827	0.00335501	0.00227088	0.00593192	-0.00276959	-0.0020146	-0.00624856	0.00974942	-0.00393383
AC007846.2	0.00953882	0.00259729	0	0	0	0	0	0	0	0	0	0	0	0	-0.0554637	-0.0700769	-0.0549398	-0.0700769	-0.0700769	0	0	0.00274469	0	0	0	0	0	0.00599705
AC007848.1	0.0177103	0.0174159	0	0	0	0	0.0150667	0.0322875	0.0252172	0	0	0	0	0	-0.194488	-0.194488	-0.0575819	-0.107983	-0.15353	0.0988316	0.0603351	0.000563546	-0.0550291	-0.0810325	-0.0716995	-0.079111	-0.0729454	-0.0994588
AC007848.2	0.0126351	-0.00444847	-0.000269116	0.013999	-0.0130311	-0.0351615	-0.0237388	-0.0130054	0.00400539	0.00336401	0.0407798	-0.0123412	-0.0261891	-0.0212502	0.140075	0.0523147	0.0155562	0.0219472	0.0217467	-0.000454844	0.0228452	0.0345415	0.0475965	0.0529653	0.0136516	0.0396286	0.0179337	0.044788
AC007861.1	0	0	0	0	0	0	0	0	0	0	0	0	0	0	0	0	0	0	0	0	0	0	0	0	0	0	0	0
AC007861.2	0.0935381	0.0562973	0	0	0	0	0	0.0450351	0	0	0	0	0	0.02408	-0.0141205	-0.0234772	-0.131823	-0.00890841	-0.131823	-0.0184271	-0.0787815	-0.0787815	-0.0787815	-0.0787815	-0.0787815	-0.0787815	-0.0787815	0.0366415
AC007876.1	0.0277672	0.124036	0.0763082	0.00609557	-0.0206253	-0.0761298	-0.069527	0.0204735	-0.0302408	-0.0356042	0.00681301	-0.0579907	-0.0925576	0.0483879	0.0158061	-0.00573568	0.108874	-0.123288	-0.0253698	0.0268593	0.0165982	0.0001879	0.0112845	-0.0337687	-0.0617346	0.0821577	-0.0617346	-0.0361135
AC007878.1	-0.00485188	0.0622727	0.00768336	-0.0559926	-0.0572307	0.0854755	0.206548	0.0239613	0.0728349	0.0715076	0.0659043	0.201124	0.0922473	0.0874801	-0.244129	-0.132099	-0.0858803	-0.0362829	0.0172226	0.192226	0.148909	-0.0074773	0.270596	0.196933	0.343729	0.169076	0.259019	-0.0458297
AC007879.1	0.0497678	0.0517183	0.0569026	0.10375	0.0525216	0	0	0	0.85077	0.079696	0	0	0.0413857	0.0250907	0	0	0	0.127559	0.120978	-0.0823102	0.066234	-0.00873975	-0.0106236	-0.0105987	-0.0823102	-0.0823102	-0.0823102	0.0348253
AC007879.2	-0.254274	-0.255174	-0.257226	-0.166114	-0.261653	-0.051609	-0.0619937	0.0978542	0.118113	0.30392	0.346815	0.143343	-0.0807634	0.0330706	-0.12213	0.0856308	-0.338374	0.202213	-0.344043	0.0399004	-0.178045	-0.0237644	-0.258631	-0.199108	0.0320318	-0.073053	-0.125947	-0.0184805
AC007879.3	-0.0452139	0.132627	0.018467	0.26411	0.137699	-0.113156	0.424274	0.193681	0.447781	0.304498	0.319496	0.8143	0.512606	0.235089	0.16081	0.0606345	0.368043	0.155366	0.230446	0.0914522	-0.197176	-0.22577	-0.0296536	-0.116127	-0.067055	-0.162763	-0.163405	-0.0569913
AC007879.4	-0.0320479	0.0572411	0.203213	-0.220092	-0.316038	0.0881692	0.243243	0.00546403	0.117978	0.334287	0.408183	0.256594	0.641127	0.619172	-0.816225	-0.619492	-0.816225	-0.22252	-0.0616781	-0.235793	-0.659195	-0.932509	-0.441901	-0.426064	-0.63499	-0.810895	-0.519511	-0.367984
AC007881.2	0	0	0	0	0	0	0	0	0	0	0	0	0	0	0.127514	0	0.133919	0	0	0	0	0	0	0	0	0	0	0
AC007881.3	0.0960531	0.0961677	-0.0469196	-0.0469196	0.0843784	0.293571	-0.0032453	0.00180348	-0.00516858	-0.0508451	-0.0409933	-0.0229761	0.223679	0.071551	-0.143296	-0.139698	-0.125197	0.068908	0.0738539	0.277615	0.0275516	0.174505	0.106029	0.13159	0.0539099	0.00541176	-0.0448082	0.104631
AC007906.2	0.083098	-0.0425663	-0.0983916	-0.397659	-0.488725	-0.229785	0.127219	0.13111	-0.0611013	0.136592	0.225308	0.130743	0.688019	0.471067	0.39862	0.295247	0.131667	-0.311815	0.0883756	0.181125	0.52132	0.829736	0.43756	0.937641	0.898692	0.492664	0.811823	0.70963
AC007907.1	0	0	0	0	0	0	0	0	0	0	0	0	0	0	0	0	0	0	0	0	0	0	0	0	0	0	0	0
AC007920.1	0.00117149	0.00195398	-0.00653367	-0.00653367	-0.00653367	0.00989432	0	0.00816564	0	0	0	0	0	0.00869462	0.0197341	0.0195407	0.0222975	0.0223681	0	0.01648	0.0258274	0	0.0112622	0.00909604	0	0.00971174	0.0109671	0
AC007920.2	0.187893	0.403571	0.525503	0.579845	0.0185166	0.0252457	0.0332408	0.0471214	0.0404441	0.192131	0.171895	0.632467	0.240994	0.30381	0.0897441	0.0685773	0.357025	0.0575444	0.267871	0.0666015	0.0985357	0.241092	0.216186	0.355928	0.406147	0.532905	0.166667	0.594368
AC007922.1	0	0	0	0	0	0	0	0	0	0	0	0	0	0	0	0	0	0	0	0	0	0	0	0	0	0.0827502	0	0
AC007922.3	0	0.0607959	0	0	0	0	0	0	0	0	0	0	0	0	0.0250758	-0.000919021	0.111155	0.127132	-0.00100667	0	0	0	0.00579834	0	0	0.0121851	0	2.63e-05
AC007923.1	-0.0603423	-0.0602197	-0.0600176	0.0291768	-0.0606922	-0.176387	0.0787383	-0.166064	-0.0107448	-0.0999296	0.105078	-0.285579	0.376429	-0.285579	0.0596183	-0.259307	-0.229838	0.256668	0.155325	0.048937	0.145279	0.356825	0.404544	0.0836297	-0.00204752	0.0947988	0.220968	0.27748
AC007923.4	0.37119	0.062737	0.108833	0.299051	0.104245	0.134683	0.167908	0.0762305	0.292079	0.014538	0.267625	0.0542957	0.302388	0.407766	0.493662	0.267154	0.32554	0.253026	0.343195	0.439281	0.156442	0.357541	0.266586	0.329169	0.75701	0.250747	0.579016	0.384789
AC007938.1	0.00790672	0	0.00703103	0	0	0.0567079	0.0769706	0.00748002	0.0349552	0.00602149	0.0149694	0	0.0630148	0.00913187	0	0	0.0619048	0	0.055866	0.00609991	0.0236675	0.0161667	0.0387855	0.00833754	0	0.0252589	0.0120682	0
AC007938.2	-0.0118866	-0.0159606	-0.0275081	-0.0127298	-0.0275081	-0.0241591	-0.0327387	-0.0154364	0.0221789	-0.00723563	-0.0244205	0.0280975	-0.0330495	-0.031785	0.0969329	0.0790871	0.0631971	-0.00896331	0.0108496	0.0633644	0.00211325	0.0389205	0.129118	0.00786957	0.0367805	0.0146557	0.0134525	-0.0156474
AC007938.3	0.254204	0.141732	0.172488	-0.0610458	-0.0940496	0.333534	0.0641545	0.384977	0.30604	0.106055	0.168929	0.528737	-0.263389	-0.319921	-0.163734	0.514172	0.393589	0.641363	-0.0682819	0.07628	0.49322	0.375916	0.573173	0.800384	0.492257	0.460579	0.246755	0.161746
AC007948.1	0	0	0	0	0	0	0	0	0	0	0	0	0	0	0	0	0	0	0	0	0	0	0	0	0	0	0	0
AC007950.1	0	0	0	0	0	0	0	0	0	0	0	0	0	0	0	0	0	0	0	0	0	0	0	0	0	0	0	0
AC007950.2	0.0589361	0.0188979	-0.000383679	-0.00733462	-0.0104032	-0.0107488	-0.000129704	-0.007365	0.00142396	-0.0167666	0.00204555	0.00153208	-0.010318	1.00244	-0.0628297	0.0135362	-0.0104675	-0.0128758	-0.0394352	0.020471	0.00735743	-0.00649163	0.0308145	0.00767505	-0.0144352	0.0656487	0.0991051	0.0452377
AC007952.1	0.00476434	0.131937	0.0961764	0.201753	-0.0343045	0.0271369	-0.0303264	-0.103413	0.0614063	0.09349	0.0849506	0.0245716	0.306096	0.019944	0.415946	-0.0510292	0.0179534	0.17629	0.151208	0.099406	-0.0402355	0.0429652	0.0831772	0.506784	0.255458	-0.0334777	0.131773	0.179572
AC007952.3	0.0370396	0.00270628	-0.123157	0.301309	0.19173	-0.221975	-0.105105	-0.189105	-0.0791325	0.193802	0.241891	-0.36858	-0.153153	-0.23855	-0.414312	-0.492813	-0.434303	-0.0304494	-0.484879	-0.367848	-0.314353	-0.323958	-0.233445	-0.239647	-0.604173	-0.486626	-0.666703	-0.324454
AC007952.4	-0.334286	-0.0855586	-0.104207	-0.241447	-0.237874	-0.224859	0.0330685	-0.146881	0.417387	-0.417876	-0.279129	0.245098	-0.658435	-0.749884	0.560871	0.461483	0.358315	0.449275	0.385022	-0.558648	-0.431076	-0.360611	-0.0532191	0.142806	-0.868315	-0.0177637	-0.501601	0.838635
AC007952.5	-0.0387743	-0.0387743	-0.0387743	-0.022509	-0.0249009	0.0100299	0	0	0	0	0.0161041	0	0.0351765	0	0.0392421	0	0	0	0.0385316	0	0	0.021924	0	0.039749	0	0	0	0.0157881
AC007952.6	-0.00666996	-0.0183566	-0.00277384	-0.0106895	-0.0267676	-0.0206865	-0.00263359	0.0125194	-0.00296129	0.0715669	0.0601671	0.0213911	0.0988901	0.0775411	-0.131895	-0.114617	-0.0627221	-0.111205	-0.112544	0.0434313	-0.00627607	-0.0326114	0.0766613	-0.0538718	-0.0581772	-0.021666	-0.0112201	-0.0394524
AC007952.7	-0.0244937	-0.0244937	0.011498	-0.0244937	-0.0244937	-0.0638636	-0.0638636	-0.0638636	-0.0638636	-0.00901559	0.00684435	-0.00281192	0.0379208	-0.0638636	0.0798148	0	0	0.0878981	0.0821344	-0.0483878	0.00476854	-0.0483878	-0.0483878	-0.00969063	0.0641993	-0.0483878	-0.0483878	-0.00532133
AC007952.8	-0.0458144	0.0345314	-0.123157	0.11631	0.120602	0.020942	0.0776641	-0.189105	-0.0791325	0.0635593	0.0990334	-0.282549	-0.170043	-0.0537516	-0.336777	-0.615977	-0.557466	-0.690849	-0.701995	-0.572464	-0.22019	-0.498149	-0.407636	-0.484927	-0.778364	-0.508711	-0.840894	-0.499026
AC007953.1	0	0.0508736	0.0524048	0.142186	0.0531809	0.443798	0.943138	0.448022	1.52982	0.357764	0.650143	2.53982	2.26289	2.57514	0	0	0	0.246354	1.39867	0.159446	0	0.172085	0.181214	0.132223	0.520942	0.175858	0.129853	0.528694
AC007953.2	0.0337725	-0.303285	-0.303285	-0.303285	-0.303285	0.64068	1.20717	1.15972	0.540723	-0.23584	-0.0982902	1.92309	0.698877	0.879421	0	0	0	0	1.26935	0.260519	0.425209	0	0	0.332661	0	0.356396	0.833054	0.714534
AC007966.1	0	0	0	0	0	0	0	0	0	0	0	0.0267651	0	0	-0.146582	-0.218238	-0.142036	-0.218238	-0.218238	0	0	0	0	0	0	0	0	0.0206178
AC007991.3	0	0	0	0	0.0631251	0	0.0576826	0	0	0.047476	0	0	0.0473169	0.0419299	0	0	0.157366	0.249941	0	0.0905465	0	0	0	0	0	0	0	0
AC007991.4	0	0.00553197	0	0	0.0473299	0	0	0	0	0	0	0	0	0	0.192883	0.0834437	-0.0411988	-0.0360274	0.0892369	0	0	0	0	0	0	0.0552697	0	0.0481725
AC007993.2	0	0	0	0	0	0	0	0	0	0	0	0	0	0	0	0	0	0	0	0	0	0	0	0	0	0	0	0
AC007993.3	-0.060711	-0.0606145	0.0117422	-0.0606492	-0.0605363	0.16055	0.0329574	0	0	0	0.139425	0.121579	0.0518015	0	-0.0674926	-0.141716	-0.248946	-0.0738582	0.00180218	0.0575695	-0.00085974	-0.00085974	-0.00085974	-0.000632182	-0.0001891	-0.00085974	-0.000666223	0.000151837
AC007998.2	-0.154631	-0.076031	-0.0762166	0.0990969	-0.0808515	-0.263344	-0.264459	-0.291094	-0.0673799	-0.128878	-0.228567	-0.274109	-0.291429	-0.358643	0.359585	0.243203	0.378288	0.00198226	0.223462	0.374864	0.497122	0.280406	0.148605	0.597574	0.13795	0.167049	0.0173792	0.112732
AC007998.3	-0.211054	-0.338797	0.0908363	-0.283098	-0.186385	0.199947	0.0813304	0.0273551	0.0541081	0.0852012	-0.0362291	-0.108372	0.0163106	-0.0920177	-0.199373	-0.0382304	-0.0914176	-0.293883	-0.235863	-0.0600744	0.0998048	0.141307	0.127547	0.0839523	-0.0587447	-0.0124048	0.000636849	0.0498764
AC007998.4	0.0281913	-0.0311288	0.0337203	-0.0472358	-0.0786196	0.0643141	0.0924844	0.0268138	-0.0220742	0.0308258	0.0178458	0.0020157	0.0247059	0.096581	-0.159752	-0.453572	-0.0783928	-0.219263	-0.306851	-0.0304762	-0.0938564	-0.00832223	-0.00984699	0.0436591	0.044024	-0.0270468	-0.0453199	-0.083714
AC008011.2	0	0	0	0	0.0323974	0	0	0.554474	0	0.0263649	0	0	0	0	0	0	0	0	0	-0.0044667	-0.0311726	-0.0311726	-0.0311726	-0.0311726	-0.0311726	-0.0311726	-0.0311726	-0.0311726
AC008014.1	-0.212807	-0.0830108	-0.636105	-0.20519	-0.158706	0.283711	0.524261	0.991342	0.769117	0.544637	0.370903	1.22937	1.27165	1.16365	0.61593	1.69844	1.67987	1.34065	1.95816	0.235794	0.0418883	-0.00347147	0.482526	-0.0834672	0.131466	-0.191593	0.61452	-0.122192
AC008033.3	-6.73242e-05	-6.15053e-05	0.000639505	-6.73242e-05	-6.73242e-05	0	0	0	0	0	0	0	0.0112436	0.0235012	0.0945855	0.114784	-0.000301749	-0.000302979	0.0869726	1.07e-05	0.000355923	0.0352849	0.0297179	8.3e-06	0	0.0196958	0	0
AC008035.1	0.159445	0.364953	0.595053	0.666869	0.24913	0.356573	0.674458	0.821544	0.62317	0.0470148	0.0968164	1.43762	0.49193	0.215348	0.0687447	-0.357658	0.571473	0.462336	1.14334	0.0162147	0.0837535	0.0254747	0.291703	0.620603	0.293413	-0.0536625	0.693307	0.393172
AC008040.1	-0.011677	-0.00604013	0.0508851	-0.0351898	-0.0289468	0.0731562	0.0490249	0.0181333	-0.00274233	0.0249429	0.0131848	-0.0146704	0.0101817	0.0304435	-0.132948	-0.193991	-0.158932	-0.0847263	-0.151247	0.0435949	0.0345839	-0.000483756	-0.00328504	-0.0170378	-0.0153275	-0.0418716	-0.0496605	-0.0462545
AC008040.5	0.0312612	0.034359	0.0214054	0.00398669	0.0269987	0.0196163	0.0106062	0.0491153	-0.00169998	0.00828289	0.0268982	0.0729457	0.0441915	0.0395775	0.00545944	0.00750129	0.0170523	0.00888934	0.00170442	0.0250769	0.115904	0.0454997	0.00572735	0.0194606	0.14049	0.0990202	0.178177	0.0138088
AC008050.1	0	0	0	0	0	0	0	0	0	0	0	0	0	0	0	0	0	0	0.102776	0	0	0	0	0	0	0	0	0
AC008056.1	0	0	0	0	0	0	0	0	0	0	0	0	0	0	0.186437	0	0	0	0	0	0	0	0	0	0	0	0	0
AC008056.2	0.0726044	-0.0452183	-0.0452183	0.00825409	-0.0452183	-0.0147878	-0.00219628	-0.00355633	-0.0510462	-0.0510462	-0.00437625	0.00935929	-0.01623	-0.0510462	0.125568	-0.030474	-0.104589	-0.235493	0.0202651	0.186341	0.0805861	0	0.155099	0	0	0.0630349	0.0709038	0.000442308
AC008060.1	0	0	0	0	0	0	0	0	0	0	0	0	0	0	-0.120532	-0.0491757	-0.0794024	-0.0800637	-0.119043	0	0	0	0	0	0	0	0	0
AC008060.2	0	0	0	0	0	0	0	0	0	0	0	0	0	0	0	0	0	0	0	0	0	0	0	0	0	0	0	0
AC008060.3	0	0	0	0	0	0	0	0	0	0	0	0	0	0	0	0	0	0	0	0	0	0	0	0	0	0	0	0
AC008063.1	0.3906	0.973262	0.773857	0.604733	0.340562	0.637094	1.05968	1.28863	1.35399	1.4444	1.50598	2.26006	2.75808	2.87304	0.413112	0.878958	1.38489	0.747578	1.71499	0.179304	-0.0403214	0.347267	0.565591	0.76104	0.92506	1.46169	1.58225	1.81274
AC008063.2	0.0584392	0.0965619	0.21309	-0.0288206	-0.25342	0.158025	0.247382	0.645202	0.55954	0.147211	0.193674	0.689548	0.812569	1.73456	0.106523	0.231947	0.234236	0.219523	0.221622	0.0831089	-0.124198	0.0263072	0.179518	0.15291	0.111275	0.0243818	0.397001	0.384095
AC008067.1	0	0	0	0	0	0	0	0	0	0	0	0	0	0	0	0.0784942	0	0	0	0	0	0	0	0	0	0	0	0
AC008073.1	-0.0555464	-0.0555464	-0.0555464	-0.0555464	-0.0555464	0	0	0.0485459	0	0.0426563	0	0	0	0	-0.0159256	-0.141295	-0.141295	-0.141295	-0.0047423	0	0	0.0756775	0	0	0	0	0	0
AC008073.2	0.0373008	0.0405727	0.11664	0.0299091	0.0686481	0.0270074	0.0375675	0	0	0	0.0753449	0.0369476	0.0300161	3.18694	0.208237	0.0290087	0.125706	-0.0664599	0.173313	-0.000467333	-0.000396546	0.0506593	0.0449183	0.0445787	-0.000467333	0.0489168	0.0515471	0.0382746
AC008073.3	0.0381135	0.00727359	0.0298447	0.0385305	0.0348573	-0.0294027	0.031597	0.0208136	0.0213343	0.0599376	0.0577916	0.101872	0.0589845	0.0350937	0.0425686	0.0361383	0.0793694	0.062049	0.101054	-0.0233714	-0.0264966	0.0214495	-0.0097916	-0.0273417	0.0821983	0.0316258	0.0230741	0.0223748
AC008074.1	0.0783412	-0.0365472	0.00181469	-0.0365472	-0.0365472	0	0.0330818	0.0378629	0	0.0294866	0.0366307	0.342715	0.0568667	0	-0.0867818	-0.0373882	-0.0867651	0.00363779	-0.0862639	0	0	0.142654	0	0	1.49e-05	0.0862715	0.0491322	0.0112847
AC008074.3	-0.0642926	-0.220893	-0.116643	-0.199053	-0.20163	0.0884753	0.0322311	-0.0157413	0.00210474	0.0820569	0.0791606	0.0859709	0.33514	0.254174	-0.264165	-0.0718286	0.0892904	-0.013114	-0.0123303	0.0770285	-0.0448654	-0.0767596	-0.1591	-0.0986807	0.0805607	-0.161538	-0.172417	-0.0565992
AC008079.1	-0.00187211	-0.00187211	-0.00187211	-0.00187211	-0.00187211	0	0	0	0	0	0	0	0	0	0.00420318	0	0	0	0	0	0	0	0	0	0	0	0	0
AC008079.2	-0.000943945	0.00301632	-0.00977178	-0.00321943	-0.0118569	-0.0104219	-0.000238424	-0.00769144	-0.0150522	-0.00850667	-0.00945517	-0.00828018	-0.0194436	-0.0098381	-0.0475012	-0.032033	-0.00493651	-0.0592444	-0.0298794	0.00290596	0.00900255	0.00101162	0.0076327	0.000247893	0.00141711	0.00473794	-0.0122221	-0.000979885
AC008080.1	0.0410338	0	0	0	0	-0.023386	-0.00312161	0.0197554	-0.023386	-0.023386	-0.000800318	0.0584249	1.46091	3.11287	0	0.126265	0.121625	0	0.106331	0.0075883	-0.0277553	0.0138219	-0.0382191	-0.0641006	-0.0641006	-0.039302	-0.0274029	-0.040656
AC008080.2	0	0	0	0	0	0	0	0	0	0	0	0	0	0	0	0	0	0	0	0	0	0	0	0	0	0	0	0
AC008080.3	-0.0852202	-0.0852202	-0.0852202	-0.0852202	-0.0852202	0	0	0.0995979	0	0	0	0	0.0594914	0.187	0	0	0	0	0	0	0	0	0	0	0	0.114892	0	0
AC008080.4	0	0	0	0	0	-0.0129656	-0.0129656	-0.0129656	-0.0129656	-0.0129656	-0.0129656	-0.0129656	-0.0129656	-0.0129656	0.00757212	0	0.173112	0	0	0	0	0	0.0162349	0	0	0	0	0
AC008083.1	0	0	0	0	0	0	0	0	0	0	0	0.0572656	0.0579757	0.0197661	0	0	0	0	0	0	0	0	0	0	0	0	0	0
AC008083.2	-0.215255	-0.3126	-0.432262	-0.448871	-0.466082	-0.420281	-1.02689	-1.08127	-1.60938	-1.22994	-1.22657	-1.74706	-1.37022	-1.46619	0.965845	0.986111	-0.111418	0.00596541	1.07905	0.60157	0.12943	-0.229529	0.148361	-0.178809	-0.642681	-0.202994	-0.632024	-0.52591
AC008083.3	0	0	0	0	0	0.236087	0	0	0	0	0	0.156798	0	0	0	0	0	0	0	0	0	0	0	0	0	0	0	0
AC008105.1	0.110811	0.0816473	-0.153101	-0.00145844	-0.0836606	0.141958	0.227834	0.127604	0.00828527	0.3397	0.175725	0.465578	0.648881	0.488228	0.390125	0.427947	0.303972	-0.117661	0.128996	0.363739	-0.000264268	0.0992773	0.247396	0.0402098	0.283819	0.0499819	0.144865	0.162813
AC008105.3	0.438808	0.166743	0.24256	0.473185	0.332139	0.161611	0.1604	0.00482445	0.043777	0.180099	0.256045	0.253166	0.827449	0.611584	-0.222657	-0.0679886	-0.11541	-0.0559482	-0.0343952	0.173689	0.153925	0.0174403	0.128162	0.150578	0.516004	0.629563	1.07741	0.527955
AC008109.1	0	0	0	0	0	0	0	0	0	0	0	0	0	0	0	0	0	0	0	0	0	0	0	0	0	0	0	0
AC008114.1	0	0	0	0	0	0	0	0	0	0	0	0	0	0	0	0	0	0	0	0	0	0	0	0	0	0	0	0
AC008115.1	0	0	0	0	0.717558	0.619133	0	0	0	0.425707	0	0	0	0	0	0	0	0	0	0	0.779528	0	0	0	0	0	0	0
AC008115.2	0	0	0	0	0	0	0	0	0	0	0	0	0	0.109417	0	0	0	0	0	0	0	0	0	0	0	0	0	0
AC008115.4	0.219517	0.0728913	0.191648	0.102464	0.177276	0.0724377	0.16426	0.0950196	0.183447	-0.0524594	-0.0392107	0.132451	-0.0194529	-0.0938457	0.333831	0.0309251	0.0561894	-0.198358	0.174786	-0.0577289	0.0502007	0.152687	0.157701	0.00468927	0.106309	0.0503561	0.307356	-0.0417701
AC008121.2	-0.0418992	-0.0397747	0.0257896	-0.0963203	0.0163736	-0.033862	-0.156877	-0.0899793	-0.0575356	0.104784	0.0830798	-0.0642355	-0.167851	0.0191535	0.0390828	-0.319774	-0.0304102	0.055467	-0.189224	-0.186301	-0.108034	-0.191868	-0.0299149	-0.150831	-0.0313459	0.186967	0.475451	-0.203816
AC008121.3	0	0	0	0	0	0	0	0	0	0	0	0	0	0.0357064	0	0.204683	0	0	0	0	0.169667	0.0961565	0.103418	0.159058	0.231429	0	0.294527	0
AC008124.1	0.100435	0.0117966	-0.0441954	-0.00122123	-0.162011	-0.107711	-0.183356	-0.238725	-0.354796	-0.360017	-0.386764	-0.454271	-0.487074	-0.551415	-0.166374	-0.164846	-0.143677	0.0256657	-0.195251	0.128707	0.19094	0.362438	0.288054	0.323953	0.302767	0.212436	0.190109	0.317055
AC008125.1	0	0	0	0	0	0	0	0	0	0	0	0	0	0.0107764	0.0687802	0	0	0	0	0	0	0	0	0	0	0	0	0
AC008127.1	0	0	0	0	0	0	0	0	0	0	0	0	0	0	0	0	0	0	0	0	0	0	0	0	0	0	0	0
AC008133.1	0	0	0	0	0	0	0	0	0	0	0	0	0	0	0	0	0	0	0	0	0	0	0	0	0	0	0	0
AC008147.1	0	0	0	0	0	0	0	0	0	0	0	0	0	0	0	0	0	0	0	0	0	0	0	0	0	0	0	0
AC008149.1	0.0650272	0	0	0.0540946	0	-0.0550389	-0.0550389	-0.0550389	0.000910378	0.0725885	0.109787	0.00997939	0.143579	0.125914	-0.190638	-0.665426	-0.199426	-0.0855477	-0.197137	-0.133107	-0.044819	0.076511	-0.133107	0.00813356	0.0387982	-0.0166723	0.185714	-0.133107
AC008154.1	0	0	0	0	0	0	0	0	0	0	0	0	0	0	0	0	0	0	0	0	0	0	0	0	0	0	0	0
AC008154.2	0	0	0	0	0	0	0	0	0	0	0	0	0	0	0	0	0	0	0	0	0	0	0	0	0	0	0	0
AC008162.2	0	0	0	0	0	0	0	0	0	0	0	0	0	0	0	0	0	0	0	0	0	0	0	0	0	0	0	0
AC008164.1	0	0	0	0	0	0	0	0	0	0	0	0	0	0	0	0	0	0	0	0	0	0	0	0	0	0	0	0
AC008175.1	0	0	0	0	0	0	0	0	0	0	0	0	0	0	0	0.000219727	0	0	0	-0.0144409	-0.0144409	-0.0144409	-0.0144409	-0.0144409	-0.0144409	-0.0144409	-0.0144409	-0.0144409
AC008243.1	0	0	0	0	0	0	0	0	0	0	0	0	0	0	-0.411476	-0.0818918	-0.411476	-0.411476	-0.265841	0	0	0	0	0	0	0	0	0
AC008250.1	0	0	0	0	0	0	0	0	0	0	0	0	0.0448472	0	-0.0415588	-0.500341	-0.0883009	-0.500247	-0.369468	-0.0811792	-0.0811792	-0.00104991	-0.00316455	-0.0811792	-0.0811792	-0.0109465	-0.0811792	-0.0811792
AC008264.2	0.0598838	-0.0153283	-0.00598296	-0.048094	-0.0234992	0.157428	-0.0422928	0.261674	-0.00465561	-0.451044	-0.464844	-0.0619763	-0.456439	-0.457358	0.0112387	-0.0611782	0.0239762	-0.013903	-0.0336663	0.00964201	-0.00268578	0.0302864	0.0150403	0.00227631	0.0155254	0.014589	-0.018959	-0.0192363
AC008267.5	-0.333091	-0.226285	-0.232228	-0.113952	-0.255539	-0.0101349	0.206677	0.0218004	0.159739	0.0647768	0.15581	0.897528	0.970371	0.622371	1.02125	0.795337	1.31584	0.879042	1.33688	0.119931	0.20093	0.551919	0.703265	0.713237	0.729083	0.758896	1.14258	1.53326
AC008268.1	-0.0413116	0.00398855	0.15744	-0.018546	-0.0210501	0.0263222	0.126407	0.185124	0.0786186	0.0161007	0.136286	0.112364	0.016333	0.57187	0.104219	0.0532833	0	0	0.152045	0.0141719	-0.0202698	0.0385287	-0.0202698	0.0651832	0.183281	0.0757842	0.0700636	0.0492528
AC008269.1	0	0	0.0424247	0	0	0	0.0386946	0.03769	0.0340958	0.0339755	0.0427341	0	0	0.0536254	0.207449	-0.0861234	-0.0861234	-0.0861234	0.167279	0	0.0650919	0	0	0	0	0.0967236	0	0
AC008269.2	0	0	0	0	0	0	0	0	0	0	0	0	0	0	0	0	0	0	0	0	0	0	0	0	0	0	0	0
AC008277.1	0	0	0	0	0	0	0	0	0	0	0	0	0	0	0	0	0	0	0	0	0	0	0	0	0	0	0	0
AC008278.1	4.4174e-05	-6.90073e-05	-6.90073e-05	-3.05359e-05	1.96225e-05	0	0	0	0	0.0790942	0	0	0	0	0.235529	-0.00144765	-0.000110243	0.00308103	7.97e-05	0	0	6.24e-05	0	0	0	0.000211938	0	0
AC008278.2	-0.0736014	0.015584	-0.0736014	0.00786054	-0.0736014	0	0	0	0	0.0636769	0	0	0	0	0	0	0	0	0	0.0999073	0.128164	0	0	0	0	0.0995594	0.344732	0
AC008280.3	0.125873	0.196801	0.172532	0.180522	0.106078	0.00212358	0.201949	-0.00532341	0.218707	0.310197	0.368794	0.134079	0.638288	0.608988	0.321071	0.0116283	0.117009	0.0220154	0.196143	-0.0210158	-0.0505602	0.13395	0.261732	0.325915	0.188596	0.608825	0.699221	0.332607
AC008378.1	0	0	0	0.119794	0	-0.0674381	-0.0674381	-0.0674381	-0.0674381	-0.0674381	-0.0674381	-0.0674381	-0.0674381	-0.0674381	0.15275	0	0	0	0.247999	0	0.0934787	0	0	0	0	0	0	0.151131
AC008392.1	-0.191619	-0.112036	-0.191619	-0.0313933	0.0252786	0.0952721	0.0718376	0.30921	0	0.541985	0.22551	0.397153	0.197786	0.30323	0.250832	-0.349565	-0.125019	0.121481	-0.296429	0.0441847	0.0598383	-0.00299438	0.20834	-0.0227423	0.531237	-0.10754	-0.10754	-0.018127
AC008393.1	0.0754529	-0.157581	-0.0945043	-0.0112466	-0.0342007	-0.0226382	0.0969098	0.114199	-0.106755	-0.000137101	-0.0291243	0.0719548	0.231494	0.131524	0.14457	0.149974	0.386666	0.215139	-0.00577318	-0.129266	0.20724	0.0616645	0.0180914	-0.021641	0.367602	0.237136	0.623279	0.0117501
AC008397.1	0	0	0	0	0	0	0	0	0	0	0	0	0	0	0	0	0	0	0	0	0	0	0	0	0	0	0	0
AC008397.2	0.0142669	-0.00295407	-0.00362807	-0.00241402	0.00170148	0.00771044	0.00623555	0.013189	0.0326016	0.0215	0.0273222	0.0444145	0.372878	0.710651	0.165366	0.11702	0.434986	0.0607544	0.220113	0.00250964	0.00992502	0.0372068	0.0413925	0.031666	0.107515	0.134352	0.188528	0.1261
AC008403.1	0.000290806	0.000338001	0.000369406	0.287721	0.000907889	0.236822	0	0	0.135937	0	0	0	0	0	0.00260041	0.00117251	0.00143496	-0.00109192	0.265782	-0.000404004	0.441087	0.000718605	0.000482024	0.150369	0.00156248	0.276409	0.00316811	0.144455
AC008403.2	0.0219919	0	0	0.116244	0	0.0299347	0.085491	0.0492326	0	0.0297104	0	0.347992	0.0164673	0.0263085	-0.026188	0.100765	0.091223	0.093668	0.13578	0.0444516	0.0518327	-0.00460292	0.00787799	-0.0356939	0.107648	-0.0356939	0.00635012	0.0029011
AC008403.3	0.0777368	-0.0616053	0.0918451	0.266534	0.14894	0.6807	0.287372	0	0.27561	0	0.303712	0.312893	0	0.0816376	0.0939387	-0.182709	-0.00331407	-0.0216996	-0.182709	-0.100983	-0.100983	0.374645	0.198823	0.0857583	-0.100983	-0.014376	0.00993916	0.246509
AC008406.1	0	0	0	0	0	0	0	0	0	0	0	0	0	0	0	0	0	0	0	0	0	0	0	0	0	0	0	0
AC008406.2	0	0	0	0.0563218	0	0	0	0	0	0	0	0.0637139	0	0	0	0	0	0	0	0	0	0	0	0	0	0	0	0
AC008406.3	0.162223	0.0793181	0.0985674	0.0461278	-0.0138409	0.071467	0.0380193	0.0585898	-0.00266111	0.00391618	-0.00149722	0.000594122	0.0482867	0.109772	0.0403034	0.0821197	0	0.0430438	0.0122772	-0.0159255	0.0514373	0.00575071	0.0857135	0.0777396	0.0411896	0.0432491	-0.0159255	0.00416507
AC008413.2	0	0	0	0	0	0	0	0	0	0	0	0	0	0	0	0	0	0	0	0	0	0	0	0	0	0	0	0
AC008415.1	0	0	0	0	0	0	0	0	0	0	0	0	0.0288414	0.0201459	0	0	0	0	0	0	0	0	0	0	0	0	0	0
AC008429.1	-0.258029	-0.26798	-0.137635	-0.109632	-0.0824579	-0.0751228	0.12369	0.0170703	0.219036	-0.319479	-0.245735	-0.000804187	-0.0152992	-0.170511	-0.0034514	-0.492918	-0.144826	-0.200885	-0.160342	-0.172802	-0.343045	-0.432619	-0.79062	-0.711261	-0.693497	-0.889951	-0.294241	-0.558203
AC008429.3	0	0	0.0648203	0	0.0658443	0.498084	-0.00157374	-0.0616495	0.000694764	-0.0124131	-0.0616495	-0.0616495	0.0284509	-0.0270842	-0.00394287	-0.00394287	-0.00394287	-0.00394287	-0.00394287	0.161492	-0.229392	-0.141331	-0.0309639	-0.158356	-0.229392	-0.229392	-0.229392	-0.229392
AC008434.1	0.198444	0.071773	0.00862326	0.0598227	0.106729	0	0.172055	0.0559126	0	0.0386395	0.104391	0	0	0.245496	-0.440817	-0.533176	-0.644744	-0.345801	-0.798375	0.40347	0.0859871	-0.0231792	0.0741672	0.128901	0.094044	-0.0691082	-0.0611998	-0.0691883
AC008438.1	-0.0398052	-0.0389454	-0.326886	-0.289901	0.342366	0.0178819	-0.303253	-0.263913	-0.44313	-0.154573	-0.18804	-0.189055	-0.431473	-0.192003	-0.509199	-0.024304	0.20178	-0.382202	-0.251854	0.0275915	-0.00614609	0.209428	0.500706	0.0249315	0.267825	0.373848	0.207988	0.291931
AC008438.2	0.000113215	-0.0515577	-0.0515577	0.0422557	-0.0515577	-0.0493714	-0.0493714	-0.0493714	-0.0493714	-0.0493714	-0.0493714	-0.0493714	-0.0493714	-0.0141143	0	0	0	0	0	0.0414355	0.208733	0	0.0570301	0.122717	0	0	0.484292	0
AC008440.1	-0.258222	-0.179254	-0.174799	-0.185963	0.0270624	0.0713457	-0.0753719	-0.00759003	0.0660108	0.0807052	0.081987	0.1155	0.0160581	-0.0753719	-0.0414571	0.0425134	0.0417807	0.0193467	0.310565	-0.133018	-0.190158	-0.115865	-0.220695	0.0982405	-0.0780263	-0.216199	-0.188181	-0.304987
AC008440.2	0.0134236	-0.33874	-0.429976	-0.0665763	-0.124854	-1.21131	-0.405773	-0.352494	-0.675909	-1.15072	-1.21131	1.11834	-1.15093	-1.16858	0.00079798	4.67e-06	0.000164838	0.00155689	0.000580465	-0.46637	-0.75424	-0.783513	-0.235913	-0.305008	-0.447588	-0.611602	-0.924987	-0.841315
AC008440.3	0	3.70291e-06	0	0	0	0	0	0.0550151	0	0	0	0	0.0344794	0.0289883	0	0	0	0	0	-0.082094	-0.082094	-0.082094	-0.082094	-0.082094	-0.082094	-0.082094	-0.082094	-0.082094
AC008443.2	0.048166	0	0	0.111968	0.0523231	0	0	0.101535	0	0	0	0	0	0	-0.133129	-0.13336	-0.119007	-0.132061	-0.133409	0	0	0	0	0	0.0842645	0	0	0
AC008443.3	0.0775901	-0.0319556	-0.0880601	-0.0916062	-0.142081	0.595772	0	0	0.0432623	0.0420314	0	0.074643	0.0418914	0.0370819	0.21465	0	0.14039	0.125668	0	0	0.0809923	0	0.0601469	0.191473	0.112934	0.174814	0.0712713	0.185467
AC008443.4	-0.0621208	0.0824138	-0.0621208	-0.0621208	0.00957553	0.127127	0	0.290807	0	0	0	0	0	0.146403	0	0	0	0	0	0	0	0.141701	0	0	0	0	0	0
AC008443.5	-0.176752	-0.0249738	0.147961	-0.107955	-0.029092	0.252439	0.569418	0.467549	0.517319	0.302666	0.360484	1.27044	0.869965	0.556482	0.969124	0.313685	0.848838	0.858932	1.07832	0.356989	0.558869	0.631148	0.612677	0.72812	0.776687	0.837977	0.655418	0.972412
AC008443.6	-8.45029e-05	0.0388776	-8.45029e-05	0.0407815	-8.45029e-05	0.0052775	-0.0390944	-0.0390944	-0.0390944	-0.00519271	-0.0390944	-0.0390944	0.0251359	-0.00824077	0.145604	-0.0131671	0.140396	0.00722011	0.140276	-6.49e-05	0.140629	0.158072	0.166817	0.00559041	0.0211559	0.119644	0.271547	-7.83e-06
AC008448.1	-0.117402	0.000979191	-0.116646	-0.123622	-0.106003	-0.0919767	-0.00119237	0.00214749	-0.0919767	-0.0919767	-0.0394843	0.0893065	-0.0919767	-0.0919767	-0.0905499	-0.118721	0.0638584	0.0367786	0.146735	-0.368286	-0.040054	-0.378918	-0.282609	-0.230451	-0.149466	-0.172831	-0.313063	-0.141359
AC008453.1	0	0	0	0	0	-0.246861	-0.246861	-0.175383	-0.246861	-0.246861	-0.246861	-0.246861	-0.190565	-0.246861	0	0	0.183857	0	0.00226106	0	0	0	0	0	0.163296	0	0	0
AC008456.1	0	0	0	0	0	0	0	0	0	0	0	0	0	0	0	0	0	0	0	0	0	0	0	0	0	0	0	0
AC008464.1	0	0	0	0	0	0	0	0	0	0	0	0	0	0	0	0	0	0	0	-0.0577123	-0.0577123	-0.0577123	-0.0577123	-0.0577123	-0.0577123	-0.00724852	-0.0577123	-0.0577123
AC008467.1	0.059683	0.0600397	0.0467027	-0.00275162	-0.00958902	0.0204616	0.0495149	0.0411735	0.0252365	0.0561433	0.0482296	-0.0225482	0.0502618	0.0414743	0.108052	0.0257288	0.155078	0.135332	0.0548669	0.0553986	0.065323	0.13352	0.0607863	0.125051	0.16769	0.0934589	0.40051	0.0123705
AC008474.1	0	0	0	0	0	0	0	0	0	0	0	0	0	0	0	0	0	0	0	0	0	0	0	0	0	0	0	0
AC008481.3	0.00395179	0.0146861	0.00462187	0.00610517	0.00155921	0.242252	-0.541099	-0.107595	-0.541099	-0.483445	-0.541099	-0.541099	-0.541099	-0.523524	0.0154315	-0.0309181	-0.021287	-0.0407917	-0.0250295	0.00496681	0.0842696	0.0183824	0.0064919	0.0865462	0.0936222	0.012921	0.00426709	0.0549896
AC008494.2	0	0	0	0	0	0	0	0	0	0	0	0	0	0	-0.0832376	0.13454	0.337139	0.0610095	0.128046	0	0	0	0.132578	0	0	0	0	0
AC008494.3	-0.0277835	-0.0535818	-0.182025	-0.265026	-0.165869	0.211383	-0.07351	0.226576	-0.0270075	0.0244401	0.0286991	0.0682807	0.14012	0.0851833	0.402008	0.29161	0.204373	0.0594181	0.208332	0.203157	-0.0019287	0.344063	0.188757	0.0534514	0.256041	0.196717	-0.123345	-0.20786
AC008496.2	0.095354	-0.0612195	0.0789741	0.0815372	-0.0612195	-0.019918	-0.00341842	-0.0681701	0.000389497	-0.0681701	0.00270483	0.011881	1.73536	-0.0207181	-0.179214	0.16384	-0.179214	-0.179214	-0.0247011	0.187706	0.262297	0.22743	0.21384	0	0.205315	0	0.289998	0
AC008507.2	0	0	0	0	0	0	0	0	0	0	0	0.0180352	0	0	0.0540722	0.0469349	0	0	0	0	0	0	0	0	0	0	0	0
AC008514.1	-0.0270024	-0.0837066	-0.0332267	0.0437305	-0.0837066	-0.140375	-0.063172	-0.107866	-0.0565685	-0.157294	-0.177405	-0.231232	-0.0909702	0.162626	0.00562826	0.0319575	0.155772	-0.114533	0.331653	-0.148563	-0.043313	0.184598	0.0742599	-0.0867152	-0.158311	-0.14844	-0.183268	-0.0343157
AC008517.1	0.208833	0	0	1.58215e-05	0	0	0	0	0	0	0	0	0	0.0658651	0	0	0.000123877	0.00012061	0.124484	-0.141342	-0.141342	-0.141342	-0.141342	-0.141342	-0.141342	-0.141342	-0.141342	-0.141342
AC008522.1	0.00410817	-0.151736	-0.151124	-0.0685585	-0.0530768	-0.214497	0.0209202	-0.0463464	0.335515	-0.145296	-0.154868	0.494033	-0.225778	-0.340468	-0.072286	-0.200909	-0.202633	-0.14225	0.0298774	0.146629	0.138198	-0.0831453	-0.172143	-0.35411	-0.349145	-0.382906	-0.662907	-0.544039
AC008525.1	0	0	0	0	0	0	0	0	0	0	0	0	0	0	0	0	0	0	0	0	0	0	0	0	0	0	0	0
AC008525.2	0	0	0	0	0	0	0	0	0	0	0	0	0	0	0	0	0	0	0	0	0	0	0	0	0	0	0	0
AC008534.1	0	0	0	0	0	0	0	0	0	0	0	0	0	0	0	0	0	0	0	0	0	0	0	0	0	0	0	0
AC008537.1	0.00594228	0.0483954	-0.0511029	0.00473801	-0.0511426	-0.0478289	0.0447847	-0.0478289	-0.0478289	-0.0478289	0.0496718	0.0220049	0.0244453	-0.0201944	-0.101497	-0.101544	0.12327	-0.101409	0.0150462	2.9e-05	0.114876	0.103132	0.263228	0.22037	0.000349676	0.175281	0.000175949	3.66e-07
AC008537.2	0	0.185219	0	0	0	0	0	0	0	0	0	0	0	0.0681548	0.907904	0.632339	0.740414	0.242792	0.890358	0	0	0.0899698	0	0	0	0	0.0862469	0
AC008537.4	0	0.0232317	0	0	0	-0.0199347	-0.000714042	-0.0199347	-0.0199347	-0.0199347	-0.0199347	0.01016	-0.0199347	-0.0199347	-0.0612151	-0.0599799	-0.197892	-0.112515	-0.255125	0	0	0.0152754	0.0260365	0.0583762	0.0365875	0.0720701	0.00312749	0.0258955
AC008539.1	0	0	0	0	0	0	0	0	0	0	0	0	0	0	0	0	0	0	0	0	0	0	0	0	0	0	0	0
AC008543.1	0.0673591	-0.0757177	-0.095191	-0.29264	-0.139851	-0.121909	-0.146637	-0.192365	-0.206856	-0.271334	-0.27157	-0.377139	-0.389983	-0.401304	-0.227609	-0.539252	-0.409125	-0.484033	-0.479855	0.188959	0.0643926	-0.120444	-0.144228	-0.187737	-0.157237	-0.220696	-0.249585	-0.18193
AC008543.4	-0.0654666	-0.0654666	-0.0654666	-0.0654666	-0.0654666	-0.0745041	-0.0745041	-0.0745041	-0.0745041	-0.0745041	-0.0745041	-0.0745041	-0.0745041	0.00245861	0.159133	0.0179598	0.174487	0	0	-0.116774	-0.116774	-0.116774	-0.116774	-0.116774	-0.116774	-0.0264496	-0.116774	0.0486945
AC008543.5	0	0	0	0	0	0	0	0	0	0.00662901	0	0	0	0.00428809	-0.0280883	-0.049136	-0.049136	0.0155832	0.0192226	0	0	0	0	0	0	0.0107514	0	0
AC008549.1	0	0	0	0	0	0	0	0	0	0	0	0	0	0	0	0	0	0	0	0	0	0	0	0	0	0	0	0
AC008549.2	-3.33743e-06	-3.33743e-06	-3.33743e-06	-3.33743e-06	4.20106e-05	-0.0360483	-0.0360483	-0.0360483	-0.0360483	-0.0360483	-0.0360483	-0.0360483	-0.0360483	-0.0360483	0.271746	0.0339863	0.21156	-0.076788	0.201546	0	0	0	0	0.0518327	0.122442	0	0	0
AC008551.1	0	0	0	0	0	0	0	0	0	0.068922	0	0	0	0.0422566	-0.0722134	-0.262667	0.179734	-0.0614787	-0.0513369	0	0	0	0	0	0	0	0	0.115332
AC008554.1	0.0260999	-0.00116158	-0.000327609	0.0287543	-0.0312875	-0.121447	-0.0644256	-0.121447	-0.0659331	-0.121447	-0.0325674	-0.121447	-0.121447	-0.121447	-0.0435406	0.0391085	-0.0397271	-0.126319	0.0998865	-0.0736013	0.0251624	-0.0332161	-0.0378339	0.0053508	0.151446	-0.0736013	-0.0736013	-0.0341691
AC008555.1	0	0	0	0	0	0.00957536	0.0068329	0	0	0	0	0.010811	0.00543726	0	0	0	0	0.0204869	0	0	0	0	0	0	0	0	0	0.00937112
AC008555.2	0.00348608	0	0	2.07748e-06	9.61793e-06	0	0	0	0	0.00304864	0	0	0.0111377	0	0.0338966	0.0307705	0.020821	0.00839003	0.0717503	-0.0183136	-0.0183146	-0.00705924	-0.0183092	-0.0183115	-0.0183146	-0.014011	-0.000556465	-0.0142782
AC008555.3	-0.15102	-0.15102	-0.15102	-0.0744068	-0.15102	0	0.0705285	0	0	0.264497	0.0801238	0.085386	0.104047	0	-0.676122	-0.398139	-0.451586	-0.883294	-0.602345	-0.0857105	-0.173934	-0.173934	-0.173934	-0.173934	-0.173934	-0.086107	-0.0753066	-0.0962607
AC008555.5	-0.000524863	-0.000139461	-0.000393985	-0.000524863	-0.000524863	0	0	0	0.0477222	0	0	0	0.0381753	0.0277605	-0.235555	-0.236657	-0.233314	-0.232637	-0.236657	0	0	0	0.000143461	0.000264312	0	0	0	0
AC008555.6	0	0	0	0	0	0	0	0	0	0	0	0	0	0	0	0	0	0	0	0	0	0	0	0	0	0	0	0
AC008556.1	0	0.01141	0.0210411	0	0	0	0.0196198	0	0.0302103	0	0.018167	0.0117555	0	0	0.000619274	-0.0283225	0.00210206	-0.0290869	0.0242761	0.0427031	-0.0167451	-0.00274205	0.0343964	-0.0167451	-0.0167451	0.031283	-0.0167451	0.00785585
AC008567.2	0	0.0421678	0.161535	0	0	0	0	0	0.073887	0.033317	0	0.0964852	0.0276975	0.0232356	-0.408286	-0.0510539	0.0351243	-0.393815	0.0750974	0.0841024	0.0653229	0.244202	0.137215	0.103739	0.069149	0.100743	0.124265	0
AC008568.1	0	0	0	0	0	0	0	0	0	0	0.0329606	0	0	0	-0.0949709	-0.0949709	-0.0949709	-0.0949709	-0.0949709	0	0	0	0	0	0	0	0	0
AC008569.1	0	0	0	0	0	0	0	0	0	0	0	0	0	0	-0.371046	-0.371047	-0.371046	-0.371046	-0.371047	0	0	0	0	0.245952	0	0	0	0
AC008572.1	0	0	0	0	0	0	0	0	0	0	0	0	0	0	0	0	0	0	0	0	0	0	0	0	0	0	0	0
AC008574.1	0	0.0808432	0.16601	0	0	-0.148814	-0.148814	-0.148814	-0.00448989	-0.0902642	-0.148814	-0.148814	-0.0940397	-0.0718479	0.364213	0.628047	0.367003	0.0228233	0.239225	0.0628261	0.117288	0	0.103418	0	0.305361	0	0	0
AC008575.1	0.00289637	0.00495035	0.00741835	-0.001772	-0.00275344	0.0481853	1.09428	0	0	0.529442	0.649732	0.341963	1.28018	0.982017	-0.447967	-0.0393825	-0.0149014	-0.437547	-0.40585	0.0208469	0.0176878	0.012104	0.187798	-0.00805135	0.0349401	-0.00771917	0.820724	-0.00675039
AC008581.1	-0.0832501	-0.0832501	-0.0832501	-0.0832501	-0.0832501	-0.103157	-0.103157	-0.103157	-0.103157	-0.103157	-0.103157	-0.103157	-0.103157	-0.103157	0	0	0.000525104	0.00166673	0.000363809	0	0	0	0	0	0.272785	0	0.360706	0
AC008581.2	-0.00961324	0.207918	0.211822	-0.226573	-0.372151	0.0574831	0.266805	0.126296	-0.270534	0.265612	0.237493	-0.288781	1.03533	0.1088	0.0843877	-0.11364	-0.35096	0.138799	-0.217059	0.540478	0.62367	0.832856	0.377466	0.541765	0.977159	0.556866	0.895851	1.05354
AC008591.1	0	0.0690404	0	0	0.107607	0	0	0	0	0	0	0	0	0	-0.0888214	-0.0888214	0.02187	-0.0888214	-0.0888214	0	0	0	0	0	0	0	0	0
AC008592.2	0	0	0	0	0	0	0	0	0	0	0	0	0	0	0	0	0	0	0	0	0	0	0	0	0	0	0	0
AC008592.4	0	0.0721186	0	0	0	0.0500305	0	0.0760855	0	0	0	0.100601	0	0	0.186074	0.471959	0.732579	0.00118671	0.300809	2.06e-05	0.00119766	2.48e-05	2.44e-05	0	0	1.23e-05	0	0
AC008592.5	0	0	0	0.193059	0.103016	0.104151	0	0.103733	0	0.0831757	0	0.0750404	0	0	-0.205629	-0.329844	-0.328612	-0.329844	-0.206723	0.0641215	0	0.109831	0.0604617	0.257206	0	0.0656699	0	0.170082
AC008601.1	0	0	0	0	0	0	0	0	0	0	0	0	0	0	0	0	0	0	0	0	0	0	0	0	0	0	0	0
AC008608.2	-0.331604	-0.499759	-0.93963	-0.322783	-0.477207	0.198358	0.000357083	0.463381	-0.148577	0.27977	0.348233	0.194247	0.110047	-0.317707	-1.62739	-0.638817	-0.479633	-0.345381	-0.136043	-0.0843412	0.302306	0.271279	0.180466	0.403444	0.520353	0.352567	-0.392182	-0.331155
AC008609.1	0.00035722	0.000508853	0.0118218	0.0156495	-5.28617e-05	0.0204671	0.0140527	0	0	0	0.00788717	0	2.12879	0	0.0875455	0.193213	0.0963309	0.0259234	0.00318519	-0.00765191	-0.0192819	-0.020301	-0.0107061	-0.0154527	0.0224118	-0.0190125	-0.015995	-0.0201914
AC008610.1	0.344165	0.297391	0.251716	-0.122287	-0.0154755	0.131331	0.339201	-0.148079	0.0184656	-0.0920891	-0.127445	-0.417929	-0.0893467	-0.271181	-0.465261	0.292175	0.346586	-0.113281	0.739932	-0.5098	-0.422192	-0.513424	0.219869	-0.483293	-0.154607	-0.289946	-0.217697	-0.913613
AC008619.1	0	0	0.104419	0	0	0.15954	0.0945458	0.0870756	0.114355	0	0.0447248	0.0712488	0	0	0	0	0	0	0	-0.0718546	-0.0718546	-0.0718546	-0.0718546	-0.0718546	-0.0718546	0.042427	0.0558792	-0.0081095
AC008622.2	0.143848	-0.0607627	-0.0305779	0.281947	0.187373	-0.11898	-0.00204709	-0.331567	-0.19647	-0.186033	-0.189936	-0.0947318	0.132904	0.368807	-0.0345457	0.148457	0.288823	0.162009	0.232705	0.00223084	0.0795772	0.0983757	0.0731391	0.0638294	0.323428	0.439722	0.89506	0.2037
AC008629.1	-0.231196	-0.0364946	-0.321654	0.0265816	-0.259594	-0.0404034	-0.280448	-0.310421	0.169901	-0.0509202	-0.254468	-0.183559	-0.206413	-0.0187612	0.297536	0.244446	0.169583	0.432181	0.0839187	0.0225103	0.0792252	-0.213939	0.01493	-0.0512053	0.420348	0.00143286	0.00389463	0.495496
AC008632.1	-0.0213264	-0.0131117	-0.154949	0.0268573	-0.0877564	0.0661717	-0.0189274	0.0216878	-0.0176073	-0.0201453	0.110497	-0.0530612	0.294226	0.0103078	0.254923	0	0.184983	0.249996	0.153968	0	0	0	0.210476	0.120223	0.113302	0.0413964	0.38582	0.0748604
AC008635.1	0	0.0505983	0.0521219	0.104518	0	-0.0554229	-0.00800416	-0.0554229	-0.0554229	-0.0554229	-0.0032416	-0.00729129	-0.0554229	-0.030818	-0.0858197	-0.0822161	0.0574488	-0.0789898	-0.0687543	-0.0501432	-0.0501432	-0.0501432	0.115848	0.00771694	-0.0501432	0.0130634	-0.0501432	0.00339193
AC008637.1	0.210273	-0.00252643	0.00373728	-0.0626707	-0.0626707	-1.00385	-0.946341	-1.00385	-1.00385	-0.86706	-1.00385	-1.00385	-0.920167	-1.00385	-0.178212	-0.0410081	-0.0212501	-0.178212	0.0656704	0.0497132	0.262368	0.0765597	0	0	0.0995059	0.138377	0.255646	0.11903
AC008641.1	0	0	0	0	0	0.242241	0.366246	0.495606	0	0	0.204099	0	0.142698	0	0	0.430772	0	0	0	0.497732	0	0.611092	0.309306	0	0.295642	0	0	0
AC008649.1	0	0	0	0	0	0	0	0	0	0	0	0	0	0	0	0	0	0	0	0	0	0	0	0	0	0	0	0
AC008649.2	0	0	0	0	0	0	0	0	0	0.149284	0	0.197489	0.126727	0.203744	0	0	0	0	0	0	0	0.270055	0	0	0	0.235357	0	0
AC008655.1	0	0	0	0	0	0	0	0	0	0	0	0	0	0	0	0	0	0	0	0	0	0	0	0	0	0	0	0
AC008655.2	0	0.430894	0.160627	0.402991	0	0	0	0	0	0	0.146527	0	7.61103	12.3537	-0.0442099	-0.343645	-0.343645	-0.0643179	-0.343645	0.113282	0	0.169482	0.224901	0.180829	0.266674	0.160365	0	0.253377
AC008662.1	0	0	0	0	0	-0.038502	-0.038502	-0.038502	0.000531465	-0.038502	-0.038502	-0.038502	-0.00641797	-0.0101585	0	0	0	0	0	-0.0625371	-0.0625371	0.0210977	-0.00756205	-0.0625371	-0.0625371	-0.0625371	0.00130318	-0.0625371
AC008662.2	0	0	0	0	0	0	0	0	0	0	0	0	0	0	0	0	0	0	0	0	0	0	0	0	0	0	0	0
AC008663.1	-0.0481378	0.16025	0.0257055	-0.0492105	0.022452	-0.144972	-0.0123327	0.0679181	0.0471984	-0.144972	0.0664809	0.172059	2.0395	2.21984	0	0	0	0	0.156977	0.0842984	0	0.164069	0	0.246086	0.26006	0.0863104	0.094232	0.172791
AC008663.2	-0.0130839	-0.0130839	-0.0130839	-0.0130839	0.00265203	0	0.119979	0.0537928	0	0.0130185	0.0448948	0	0.0111466	0.0270403	0.178933	0.0142466	0.0459812	-0.0389862	0.188205	0	0	0.0170305	0.0184493	0.0213786	0	0	0.183579	0
AC008663.3	0	0	0	0	0	0	0.0648679	0.0742263	0.260156	0	0	0.0808987	0.0506536	0	0	0	0	0.162474	0	0	0.108029	0	0	0	0	0.0762323	0.109815	0.0883189
AC008667.1	0	0	0	0	0	0	0	0.0526718	0.0411062	0	0.054659	0	0	0.0523465	0.114075	0	0	0.120351	0	0	0	0	0	0	0	0	0	0.0527161
AC008667.2	0	0	0	0	0	0	0	0	0	0	0	0	0	0.0461519	0	0	0	0	0	0	0	0	0	0	0	0	0	0
AC008667.3	0	0	0	0	0	0	0	0	0	0	0	0	0	0	0	0	0	0	0	0	0	0	0	0	0	0	0	0
AC008667.4	0	0	0	0	0	0	0	0	0	0	0	0	0	0	0	0	0	0	0	0	0	0	0	0	0	0	0	0
AC008676.1	-0.0242664	0.0123781	0.00826024	0.00626708	-0.0258511	0.0526267	0.096545	0.00976332	0.00827224	0.016088	0.129505	0.208239	0.0970394	0.0517081	0.121152	-0.114745	-0.092505	0.336207	-0.0915935	-0.0114678	0.0387394	-0.0897038	-0.0572003	-0.029167	-0.274189	-0.189188	-0.198407	-0.274189
AC008680.1	0	0	0	0	0	0	0	0	0.277008	0	0	0	0	0	0	0	0	0	0	0	0	0	0	0	0.296368	0	0	0
AC008686.1	0.000218329	0.000207879	0.000529966	3.9385e-05	0.0744994	0	0.134331	0	0.309089	0.210934	0.303159	0.3906	0.0343343	0.104426	-0.171362	0.100748	-0.164544	0.0940973	-0.169933	0.119687	-0.0752216	0.0027367	0.224422	-0.0120122	0.560205	0.0513273	0.0125136	0.246346
AC008687.1	0.0187105	0.0250679	-0.000997352	0.0295711	0.0114152	0	0	0	0	0.161208	0.0634255	0	0.120472	0	-0.00803762	-0.0171249	-0.00223499	0.068906	-0.0284268	0.015863	0.0693636	0.0997659	-0.0101358	0.030244	0.00218609	0.0300025	-0.0274445	-0.0260108
AC008687.2	0.443624	0.0702197	0.275552	-0.0494096	0.166886	-0.155283	-0.0701737	0.152902	0.220541	-0.0749318	0.00807263	-0.0141141	-0.22546	-0.240325	-0.605637	-0.724858	-0.837036	-0.464094	-0.978126	0.414856	0.19295	0.0164849	-0.205603	-0.0978041	-0.0472954	-0.216915	-0.258298	0.0160739
AC008687.3	0.233633	0.0651425	0.059265	0.203582	-0.0345598	0.0581354	-0.0117366	-0.0859902	0.314603	-0.000364745	0.00877725	-0.177402	-0.0794457	-0.151177	-0.616437	-0.921734	-0.542595	-0.921734	-0.921734	0.409983	0.12991	-0.0247943	-0.0839501	-0.127993	-0.205981	-0.306665	-0.306665	-0.194918
AC008687.4	0.190159	0.0955234	-0.0604159	0.0441908	-0.0832463	0.206562	1.6111	0.0273866	-0.0501065	-0.0375565	-0.0948011	0.163526	-0.0621322	-0.0948011	0.125743	-0.223804	-0.178343	-0.381073	-0.381073	0.214467	-0.081947	0.0730228	-0.00114555	-0.0479342	0.151701	0.0108008	-0.0356564	-0.0104449
AC008687.8	0.0462372	0.0164451	0.00684721	0.0276609	0.00198077	0.00904251	-0.0232382	0.0091916	0.0108267	0.0178411	0.0259651	-0.00927614	0.0440537	0.00293703	-0.198256	-0.00439594	-0.130857	-0.19333	-0.169724	0.0574944	0.022058	0.00805196	0.0354393	0.0801021	0.0295065	0.0655365	0.0151886	-0.00642148
AC008691.1	0.307018	0.0106611	0.169671	0.206227	0.252254	0.0629823	0.0619339	-0.0826953	0.00244168	-0.081148	-0.0986395	-0.0636258	-0.0100742	0.0620893	-0.432171	-0.21411	-0.498606	-0.324945	-0.40455	-0.125987	-0.192416	-0.172095	-0.302263	-0.244348	-0.279568	-0.234725	-0.23947	-0.172341
AC008695.1	0.0406509	0.0637659	0.055915	-0.127386	-0.0908123	-0.0240862	-0.00739792	-0.0513644	-0.0770732	-0.0515269	-0.058943	0.0145337	0.0466818	-0.0027258	-0.120702	-0.130304	-0.0803848	-0.148696	-0.171556	0.20651	0.221671	0.289248	0.160635	0.104606	0.169304	-0.00933552	0.0434847	0.090244
AC008700.1	0	0	0	0	0	0	0	0	0	0	0	0	0	0	-0.0847496	0.106094	0.0212056	0.0698944	0.0239393	0	0	0	0	0	0	0	0	0
AC008703.1	-0.0512832	0.00589687	0.0267532	0.0387781	0.0212811	0.0288254	-0.0378626	0.0375234	-0.0364466	0.184066	0.177805	-0.023993	0.377605	0.632581	0.122638	0.0406131	0.156588	0.00506313	-0.044962	0.0359813	0.123101	0.0774314	0.00826655	0.0488804	0.0376474	-0.0281853	-0.0281853	0.0176972
AC008705.1	0	0	0	0.129482	0	0	0.367944	0	0.12059	0.0969714	0.259814	0	0	0.0644403	-0.00282629	-0.00341825	-0.00341825	0.143312	-0.00212171	-0.0897169	-0.0897169	-0.0897169	-0.0897169	-0.0897169	0.0139582	-0.0897169	-0.0897169	0.0343319
AC008708.2	0	0	0	5.24178e-06	0	0.0386322	0	0	0.0203203	0	0.0579445	0	0	0	0.047027	-0.105894	-0.0455269	0.00210343	-0.104864	-0.0329001	-0.0328985	-0.00561012	0.00543568	-0.00502421	0.00289568	0.0183143	-0.0329001	-0.0110868
AC008728.1	0.0871861	-0.064056	0.129733	0.111108	-0.0261085	-0.0371588	-0.00195397	0.0429067	0.0607453	0.0770699	0.117386	0.00639404	0.0766008	0.0829959	0.161803	-0.0170499	0.110086	0.0671515	0.0174765	0.046654	0.225912	0.199882	0.137381	0.179683	0.121615	0.217201	0.160933	0.0883197
AC008731.1	0	0	0.049825	1.45711e-05	0.0491028	0	0	0	0	0.0771117	0.0433675	0	0	0	0.205551	0.421505	0.406829	0.247981	0.389137	3.42e-05	0	0.101792	0	0.0638698	0	0	0	0.0586913
AC008734.1	0	0	0.0559184	0	0	0	0	0	0	0	0	0	0	0	0.127143	0.257957	0.151232	0.129267	0.264651	0	0	0	0	0.132737	0	0	0	0
AC008735.2	0	0	0	0	0	0	0	0	0	0	0	0	0	0	0.140986	-0.207443	0.6734	-0.099333	0.0865976	0.0637894	0	0	0	0	0	0	0	0
AC008735.3	0	0	0	0	0.0591531	0	0	0	0	0	0	0	0	0	0	0	0.148409	0	0	-0.0599842	-0.0599842	-0.0599842	-0.0599842	-0.0599842	-0.0599842	-0.0599842	-0.0599842	-0.0599842
AC008735.4	-0.0394985	0.00548335	0.00680536	0.0458268	-0.0394985	0.543475	0	0.0958352	0	0.0367348	0	0.0428251	0.0305544	0.0323728	-0.51268	-0.2755	-0.280432	-0.674292	-0.381019	0.0378607	0.0722009	0	0	0	0.147245	0.111616	0	0.0478383
AC008736.1	0.316857	-0.0989932	0.0198434	-0.224038	-0.105874	-0.13401	0.119421	-0.139169	-0.0431679	-0.281693	-0.248336	-0.0518044	-0.0277298	-0.213102	0.289739	1.06918	0.280496	1.24667	1.21963	-0.177673	-0.235648	0.319799	0.307858	0.379129	0.149461	0.241653	-0.0711815	0.455945
AC008736.2	-0.0500164	-0.0500164	0.00952212	-0.0500164	-0.0500164	0	0	0	0.1483	0	0	0	0	0	0.238308	0.255758	0.142497	0.136081	0.382449	-0.0914701	-0.0914701	-0.0177016	-0.0256701	-0.0914701	-0.0914701	-0.0200463	-0.0914701	-0.0914701
AC008738.2	0	0	0	0	0	-0.267827	-0.267827	-0.267827	-0.267827	-0.267827	-0.267827	-0.267827	-0.267827	-0.222011	-0.597054	-0.597054	-0.387837	-0.597054	-0.0798428	0	0	0	0.115481	0.109031	0.176281	0.104297	0	0
AC008738.3	0	0	0	0	0	0	0	0	0	0	0	0	0	0	0	0	0	0	0	0	0	0	0	0	0	0	0	0
AC008738.4	0	0	0	0	0	0	0	0	0.0304826	0	0	0	0	0.152218	0	0	0	0	0	0	0	0	0	0.0496343	0	0	0	0
AC008738.5	0	0	0	0	0	0	0	0	0	0	0	0	0	0	0	0	0	0	0	0	0	0	0	0	0	0	0	0
AC008738.6	-7.28456e-05	-0.000208505	0.000222464	0.0015264	0.00135424	0	0	0	0	0	0	0	0	0	0.25701	0.216147	-0.00182288	0.417915	0.00503285	0.062148	0.000344905	0.0704024	0.098906	0.12672	0.00243578	0.000758996	-0.000905256	-0.000355923
AC008739.1	0	0	0	0	0	0	0	0	0	0.0363236	0	0	0	0	0	0	0	0	0	0	0	0	0	0	0	0	0	0
AC008741.1	0	0	0	0.0602932	0	-0.0588028	-0.0588028	0.0037049	-0.0588028	-0.0588028	-0.0588028	-0.0588028	-0.0588028	-0.0588028	-0.00129007	0.00535351	-0.00463969	0.0107293	-0.00463969	-0.0221564	-0.0931053	-0.0180746	-0.0931053	-0.0931053	-0.0931053	0.0426561	-0.0931053	-0.0186242
AC008741.2	0.0885963	0.0343718	-0.083423	0.0145623	-0.012966	-0.0754816	-0.123834	-0.1628	-0.205941	-0.0863853	-0.100704	-0.142167	-0.210397	-0.318317	-0.118724	-0.351063	-0.333877	-0.261566	-0.107006	-0.024884	0.188651	0.132396	0.116121	0.117028	0.280818	0.107303	0.00835225	-0.0233963
AC008742.1	0	0	0	0	0	0	0	0	0	0	0	0	0	0	0	0.0623667	0	0	0.00590505	0	0	0	0	0	0	0	0	0
AC008747.1	0.157998	0.0830827	0.401719	0.175509	0.207736	0.0706058	0.346375	0.638401	0.331665	0.140556	0.00103396	0.569392	0.181225	0.153689	-0.0310126	0.0933113	-0.190146	-0.190146	-0.0123651	-0.0699535	0.256753	0.164743	0.196872	0.072243	0.19403	-0.0943395	-0.184664	-0.0137678
AC008750.1	0.152271	-0.0539774	-0.0539774	-0.0539774	-0.0539774	0	0	0.0655544	0.0512632	0.0449045	0	0	0.0456207	0.0296147	-0.274691	-0.274691	-0.274691	-0.274691	-0.274691	0.282385	0.0353348	0.0175499	0.00908601	-0.0615421	-0.0615421	-0.0615421	-0.0615421	-0.0615421
AC008750.2	0	0.0347695	0	0.0489829	0	-0.0696023	-0.154967	-0.154967	0.0420921	-0.154967	-0.154967	-0.154967	-0.100748	-0.154967	0	0	0	0	0	0.0441675	-0.0490535	0.0631454	-0.0251737	-0.112185	-0.161846	-0.11381	-0.161846	-0.124467
AC008750.3	0	0	3.67887e-06	0	0	0	0.141978	0.0797706	0	0	0	0.142109	0.554779	0.0407	0.286071	0	0	0	0	-1.06e-05	-1.06e-05	0.0947611	-6.45e-06	-1.06e-05	-1.06e-05	0.0919638	4.79e-05	-3.52e-06
AC008750.4	-0.244534	-0.244534	-0.244534	-0.244534	-0.244534	0	0.228627	0	0	0.34351	0.249759	0.682713	0.177602	0	9.85e-08	0.509885	4.1e-09	3.06e-08	3.83e-08	0	0	0	0	0	0	0	0.551941	0
AC008750.7	-0.0780344	-0.0275409	-0.0845125	-0.137061	-0.0837337	-0.0508793	0.505034	0.057491	-0.0508793	0.0265997	-0.0508793	0.0809512	0.0215735	-0.0508793	-0.247966	-0.136733	-0.247908	-0.247917	-0.247966	0.159834	0.197635	0.317652	0.0907783	0.0708178	0	0.0636845	0	0.0616743
AC008750.8	0.147151	-0.253982	-0.513865	0.0846397	-0.0897695	-0.0112815	0.11237	-0.195596	-0.105513	-0.431972	-0.407547	0.157885	-0.34362	-0.183355	-0.224858	-0.750488	-0.278027	-0.113416	-0.0265413	0.0344765	0.266855	0.163796	0.363624	0.0285337	-0.2722	0.0106337	-0.319726	-0.113488
AC008752.1	0	0	0	0.0818036	0	0	0	0	0	0	0	0	0	0	-0.165198	-0.165198	0.0412349	-0.165198	-0.165198	0.0692735	0	0	0	0.0948744	0	0	0	0.106386
AC008752.2	-0.0911816	-0.0852629	-0.123358	-0.0895998	-0.0884843	-0.209352	-0.188786	-0.252786	-0.173906	-0.171477	-0.215679	-0.220894	-0.178218	-0.252786	-0.0114732	-0.0140919	-0.0921862	-0.0065772	-0.0921862	0.113161	0.00607753	0.108791	0.191901	0.0381685	-0.0489773	0.0735287	0.0798268	0.0205372
AC008753.2	0	0	0	0	0	0	0	0	0	0	0	0	0	0	0	0	0	0	0	0.0755345	0	0	0	0	0	0.111638	0	0
AC008753.3	0	0	0	0	0	0	0	0	0	0	0	0	0	0	0	0	0	0	0	0	0	0	0	0	0	0	0	0
AC008758.1	0.0887485	0.112843	0.0785704	0.0733236	-0.0351942	-0.0454789	-0.0562945	-0.0162019	0.00629223	-0.0464168	-0.0520919	-0.0850904	-0.12611	-0.163342	0.0905261	0.093496	0.100561	-0.0478818	0.0771871	0.109694	0.0329814	0.0789407	0.115209	0.1125	0.142828	0.0414599	0.176518	0.0881337
AC008758.2	-0.0618606	-0.0271625	-0.0227468	0.0452168	-0.0617659	0.0258759	0.0349248	0	0.557142	0.0594195	0	0.0432068	0.0308692	0.0401866	-0.472932	-0.532978	-0.0548559	-0.24602	-0.311967	0.0926028	0.0695314	-0.0464888	0.0162361	0.137446	0.0514529	0.0805314	-0.0438958	-0.01901
AC008758.4	-0.0222207	0.00828613	-0.0306699	-0.0241279	-0.00850106	0.0257021	0.0435642	0.0791911	0.0441493	0.0576204	0.047303	0.146215	0.0940196	0.109306	-0.00459951	0.00324192	0.0937941	0.00593262	0.158155	-0.1214	-0.156806	-0.1573	-0.165529	-0.142391	-0.139644	-0.148004	-0.0588225	-0.0787929
AC008758.5	-0.268266	-0.165604	-0.0857605	-0.288475	-0.0475028	-0.0287518	-0.170398	-0.170398	-0.133987	-0.170398	-0.0778198	-0.0513098	2.418	-0.148686	-0.672838	-0.539906	-0.225956	-0.340857	-0.301993	0.62215	0.297798	-0.11917	0.0870638	0.165105	-0.106137	0.107074	-0.103118	-0.116266
AC008758.6	-0.127028	-0.192951	-0.323363	-0.324094	-0.460316	-0.446638	-0.3212	-0.261622	0.015494	-0.0280649	0.0753895	0.0706026	0.257408	-0.0732531	-0.320768	-0.444569	-0.0232592	-0.43113	-0.563387	0.39366	0.228801	0.564291	-0.122803	0.41518	-0.118837	0.133124	-0.42933	-0.222525
AC008759.2	-7.21346e-06	-7.21346e-06	-7.21346e-06	-7.21346e-06	0.00011978	0	0	0	0	0	0	0	0	0	0.0379004	0.0372799	0.17064	0.24989	0.321199	0	0	0	1.38e-05	0	0.00645871	0.000104901	0	0
AC008759.3	0	0	0	0	0	0	0	0	0	0	0	0	0	0	0	0	0	0	0	0	0	0	0	0	0	0	0	0
AC008760.1	0.0363862	0	0	0	5.14639e-05	0	0	0	0.0313446	0.0289153	0	0	0	0	-0.159	-0.257625	-0.00802035	-0.357568	-0.380121	0	0.0916026	0	3.38e-05	0.0440024	0	7.09e-05	0.0526058	0
AC008761.1	0	0	0	0	0	0	0	0	0	0	0	0	0	0	0.434874	9.06e-08	5.05e-08	1.43e-07	0.444001	0	0	0	0	0	0	0	0	0
AC008761.2	0.00914467	-0.0848652	0.0788202	-0.000807777	-0.0848657	0	0	0	0	0	0	0.0767205	0	0	-0.977358	-0.708515	-0.836022	-0.40066	-0.801144	-1.67e-06	-1.67e-06	0.111743	0.0931269	-1.67e-06	-1.67e-06	0.095731	-1.67e-06	-1.67e-06
AC008763.1	0	0	0	0	0	0	0	0	0	0	0	0	0	0	0	0	0.1621	0	0	0	0	0	0	0	0	0	0	0
AC008763.2	0.117303	-0.13915	-0.165438	-0.0287848	0.220585	0.680797	0.101406	0.653896	0.0171351	0.035066	-0.00937224	0.50154	0.186901	0.310409	0.326773	0.934793	0.656205	0.622865	0.498665	0.155249	0.211364	0.0657014	-0.0912617	0.226388	0.209998	0.0310927	0.350996	0.321043
AC008763.3	0.00531207	0.025841	0.0119801	0.00891939	0.018437	0.131139	0.107137	0.0637564	0.135423	0.0788218	0.126335	0.166433	0.0967393	0.0195706	0.611356	0.0607764	0.021119	0.154203	0.0740578	-0.0162186	0.116667	0.012252	0.050108	0.00203866	0.31244	-0.0134002	0.224082	-0.0563769
AC008764.1	-0.0291532	-0.00589288	-0.0215536	0.0262585	0.00621763	-0.0365289	-0.0409181	-0.000493532	-0.000978438	-0.037432	-0.0542537	0.0531315	-0.04608	-0.0325031	0.0642484	0.0201776	-0.058043	-0.0627389	0.0859092	0.0251724	0.0205419	0.00979805	0.0595797	0.0152111	0.0259821	0.0141484	0.0809045	0.000137102
AC008764.2	-1.284e-06	-1.284e-06	-1.284e-06	6.15549e-07	1.97168e-07	0	0.0891037	0	0.0947904	0.0666243	0	0	0	0.0512213	-0.141771	0.0277121	-0.455569	0.805644	0.178998	0	0	0	0	0	0	0	0.148608	0
AC008764.3	-0.0333318	-0.206686	-0.12664	-0.126984	-0.125873	-0.150977	-0.150977	-0.0697028	-0.031757	-0.0968954	0.00291507	0.0291465	-0.150977	-0.150977	0.000546329	0.187496	0.0011444	0.0293186	0.00189769	0.102288	0.159925	0.231037	0.032184	0.235858	-0.0522687	0.278245	0.259708	0.254696
AC008764.4	0.267728	0.0196952	0.270353	0.225136	0.19436	0.395878	-0.0550481	0.443914	0.286227	0.131722	0.257443	-0.437755	-0.377081	-1.33356	-1.0486	-0.301996	-0.297165	0.0967231	0.59103	0.185516	0.305759	0.159094	0.455077	-1.03774	-0.671811	-2.04562	-0.904811	-2.38969
AC008764.5	0	0	0	0	0	0	0	0	0	0	0	0	0	0	0	0	0	0	0	0	0	0	0	0	0	0	0	0
AC008764.6	0.0098939	-0.170652	-0.22126	-0.138803	-0.166946	-0.0908468	-0.180282	-0.15338	-0.222381	-0.119004	-0.144391	-0.310835	-0.101767	-0.315115	-0.427215	-0.266075	-0.142853	-0.324041	-0.425545	0.0622407	0.0318059	0.107133	-0.100022	-0.0947877	-0.0928984	-0.198312	-0.0840392	0.0430446
AC008764.8	-0.0393056	-0.0196589	-0.00905082	-0.0262385	-0.158784	0.0962831	0.0686562	0.013473	0.0431465	0.0892872	0.0722879	-0.0465888	0.206182	0.0638696	-0.269862	0.0289075	-0.209278	-0.123799	-0.222655	0.0296867	0.135977	0.108573	0.0995405	0.1082	0.0313051	0.0670512	0.246609	0.106626
AC008770.1	-0.0191608	0.075099	0.13878	0.170101	-0.120222	0.633411	0.0459179	-0.77128	-0.147655	-0.687071	-0.77128	-0.130773	-0.72866	-0.677751	0.216452	0.155232	0.534277	0.616571	0.386822	-0.43576	-0.595947	-0.0131519	-0.622745	-0.394207	-0.629184	-0.553654	-0.00252442	-0.412335
AC008770.2	0.0763649	0.236113	0.0263766	-0.0618988	-0.0428109	0.149975	0.00187082	0.180646	0.121571	0.11954	0.227712	0.291203	0.402842	0.36432	0.287224	0.25706	0.500949	0.529251	0.306704	-0.0995612	0.314777	0.139753	0.0240886	-0.039567	0.498555	0.195768	0.144025	0.0297756
AC008771.1	0.0794284	0.0694727	0.184225	0.343613	0.208191	0.253238	0.170565	0.186221	0.211023	0.283181	0.272565	-0.638048	0.291121	0.449454	0.484323	1.01068	0.561203	0.564706	0.496042	0.0265003	0.102943	0.364632	0.583833	0.404987	0.900576	0.418628	0.304883	0.213304
AC008780.1	0	0	0	0	0	0	0	0	0	0	0	0.079876	0	0	0	0	0	0	0	0	0	0	0	0	0	0	0	0.105962
AC008780.2	0	0	0	0	0.0287816	0	0	0	0	0	0	0	0	0.0151353	0	0	0	0	0	0	0	0	0	0	0	0.0384264	0	0
AC008781.1	-0.0382879	-0.0382879	-0.0382879	-0.0382879	-0.0382879	0.00103975	-0.00721767	-0.0855006	-0.0417362	-0.0180303	0.00096755	-0.0855006	-0.0855006	-0.0855006	-0.367872	-0.371933	-0.134197	-0.360892	-0.468008	0.0905497	0.103372	0	0	0	0	0	0	0
AC008781.2	0	0	0	0	0	0	0	0	0	0	0	0	0	0	0.024163	0	0	0	0	0	0	0	0	0	0	0	0	0
AC008794.1	0	0	0	0	0	0	0	0	0	0	0	0	0	0	0	0	0	0	0	0	0	0	0	0	0	0	0	0
AC008794.2	0	0	0	0	0	0	0	0	0	0	0	0	0	0	0	0	0	0	0	0	0	0	0	0	0	0	0	0
AC008799.2	0	0	0	0	0	0	0	0	0	0	0	0	0	0	0	0	0.107354	0	0	0	0	0	0.0479258	0	0	0	0	9.66e-06
AC008805.2	0.304868	0.0763301	0	0.278146	0	0	0	0.351426	0	0	0	0	0	0.0354605	0	0	0.325612	0.173163	0	-0.0755176	0.0929966	0.0763733	0.0544195	-0.0755176	-0.0755176	-0.0755176	0.0256484	-0.0755176
AC008808.1	0	0	0	0	0	0	0	0	0	0	0	0	0	0	0	0	0	0	0	0	0	0	0	0	0	0	0	0
AC008808.2	0	0	0	0	0	0	0	0	0	0	0	0	0	0	0	0	0	0	0	0	0	0	0	0	0	0	0	0
AC008825.1	0	0	0.0793547	0	0	0	0	0.0755447	0	0	0	0	0	0	0	0	0	0	0	0	0	0	0	0	0	0	0	0
AC008840.1	-0.0206054	0.149123	0.119847	0.198584	-0.135881	0.138543	0.216497	0.40014	0.0311703	0.374611	0.441928	0.382324	0.442887	0.338486	0.453003	-0.184709	0.0902561	-0.123436	0.596091	0.162234	0.20947	-0.0568948	0.0993181	-0.279568	0.308799	0.0413033	0.314249	-0.00204578
AC008852.1	0	0	0	0	0	0	0	0	0	0	0	0	0	0	0	0	0	0	0	0	0	0	0	0	0	0	0	0
AC008869.1	0.0971311	-0.164909	-0.0906487	0.0895067	-0.242014	0.0660243	0.108584	0.552621	-0.0135589	0.0882495	0.00561972	0.0108819	0.179195	0.0527366	-0.0280788	-0.381144	0.203125	-0.289823	-0.0492429	0.35646	0.0212221	-0.0502842	0.238007	-0.0433758	0.202068	0.0248463	-0.14338	-0.14338
AC008870.3	0	0	0	0	0	-0.0414042	-0.0414042	-0.0414042	-0.0414042	-0.00815711	-0.0414042	-0.0414042	-0.0414042	-0.0414042	-0.232054	-0.13796	-0.232054	-0.232054	-0.120703	-0.0669608	-0.0669608	0.0221958	-0.0669608	-0.0669608	-0.0669608	-0.0669608	-0.0669608	0.0181686
AC008870.4	0	0	0	0	0	0	0	0	0	0.0342047	0.0474211	0	0	0	-0.342924	-0.253754	-0.44353	-0.3361	-0.340134	0	0	0	0.114229	0	0	0	0	0
AC008871.1	0	0	0	0	0	0	0	0	0	0	0	0	0	0	-0.0222559	-0.501423	-0.273331	-0.106261	0.027753	0.072157	0	0	0	0	0	0.106811	0.116672	0.104053
AC008875.1	0.238566	0.210519	0.182225	0.298391	0.123787	-0.104731	0.203403	0.154242	0.066379	0.170726	0.126644	-0.0704628	0.0304587	-0.114437	0.192163	-0.176018	0.468953	0.0112345	0.0954326	0.159572	-0.0951957	0.154936	0.12062	0.0317734	-0.133447	-0.0113494	0.0993806	0.0882326
AC008878.1	0.222507	0.145815	0.456025	0.952617	0.163753	-0.660145	-0.059902	-0.444507	-0.49884	-0.541765	-0.543586	-1.16455	-0.937776	-1.08834	-0.424383	-1.07653	-0.796009	0.197593	-0.86088	0.789668	-0.331661	0.979928	1.1628	0.945401	0.57552	-0.186005	1.01456	-0.178787
AC008878.2	0.00627917	0.0135229	0.00541144	0.00362786	0.00459261	0.0229787	0.120967	0.20035	0.0222122	0.0277483	0.00173785	0.0145669	0.0208865	-0.028013	-0.0537525	0.0121217	0.00780746	-0.0574001	-0.0391424	0.245478	0.0313401	0.0224565	-0.0044513	-0.00802327	0.100841	-0.00916918	0.0893744	0.13325
AC008878.3	0.0493839	0.0683135	0.0790257	0.118423	0.0057752	0.0807428	0.0305901	-0.0493679	0.0878122	0.0319696	0.0115947	0.0698786	-0.11788	-0.177266	0.015171	0.0891809	0.113691	0.0159674	0.0113809	-0.209257	0.0743748	0.0703544	0.0557021	-0.0470651	0.274456	-0.0950218	0.278024	-0.10978
AC008878.4	0	0.154629	0	0.176481	0	-0.16816	-0.16816	-0.16816	-0.16816	-0.16816	-0.16816	-0.16816	-0.16816	-0.0720303	0.186544	-0.13207	-0.0860917	0.175655	-0.12612	0	0	0	0	0	0	0	0	0
AC008883.1	0	0	0	0	0	0	0	0	0	0	0	0	0	0	0	0	0	0	0	0	0	0	0	0	0	0	0	0
AC008883.2	0	0	0	0	0	0	0	0	0	0	0	0	0	0	0	0	0	0	0	0	0	0	0	0	0	0	0	0
AC008885.2	0	0	0	0	0	0	0	0	0	0	0	0	0	0	0	0	0	0	0	0	0	0	0	0	0	0	0	0
AC008892.1	0	0	0	0	0	-0.0699979	-0.0699979	-0.0699979	-0.0699979	-0.0699979	-0.0699979	-0.0309357	-0.0699979	-0.0699979	-0.49214	-0.49214	-0.49214	-0.49214	-0.294675	0	0	0	0	0	0	0	0.143877	0
AC008894.1	0.136742	0.126127	0.0156582	-0.0907428	-0.0907428	0.126374	0	0	0	0.141987	0.197371	0	0.0628028	0	0.435982	6.23e-05	0.975005	0.363153	0.596464	0.301081	0	0.264448	0.134284	0	0.160625	0	0.286741	0.213353
AC008894.2	-0.0403486	-0.115119	-0.11568	-0.0358632	-0.0506389	-0.547798	0.380376	-0.190383	0.154867	-0.582828	-0.619981	-0.0187721	-0.566561	-0.614697	-0.0663227	-0.0603414	-0.106448	0.000670859	-0.138517	0.119253	0.0226601	-0.0782189	0.204621	0.110333	0.103127	-0.0687701	-0.0722056	-0.0605038
AC008897.2	-0.0483808	-0.0483808	0.0132074	-0.0483808	-0.0483808	0	0	0	0	0.145935	0	0	0	0	0.058634	-0.16681	-0.16681	0.34088	0.147818	-0.0800254	-0.0794803	-0.0795727	-0.0800254	-0.0800254	-0.0800254	-0.0796726	0.360209	-0.079118
AC008897.3	0.696595	0.145281	0.332139	0.137966	0.170846	0.05223	0.0434386	-0.0642269	-0.0148269	-0.190396	-0.0635225	-0.0392523	2.44787	-0.155217	0.264024	0.0158888	-0.0491731	-0.251357	-0.0555479	-0.409791	-0.214388	-0.134511	-0.218442	0.246071	0.15017	0.0675227	0.81331	-0.0747735
AC008906.1	0.0600259	0.039342	0.177167	-0.0472451	-0.0472451	-0.21878	-0.0171608	0.100099	-0.112272	-0.0866614	-0.13352	-0.121064	-0.0987869	-0.0964617	-0.0453829	-0.272038	-0.104387	-0.129171	-0.0315929	-0.159134	-0.18681	-0.0246959	-0.0172542	-0.180622	-0.151606	0.0535257	-0.279831	-0.316749
AC008906.2	-0.0582523	-0.0582523	0.0194428	0.0272356	0.00902065	-0.0734108	-0.0734108	-0.0734108	0.0533907	-0.0210503	0.0748475	-0.0734108	-0.0734108	0.0278617	-0.0362211	-0.0162746	0.0915768	0.0672322	0.127785	0	0	0	0	0	0	0.091304	0.0991724	0
AC008914.1	-0.215917	-0.222235	-0.316918	-0.114852	-0.192496	-0.127508	-0.00775241	-0.0278291	0.0397491	-0.149006	-0.0546617	-0.00590296	-0.149006	-0.133333	-0.228301	-0.228985	-0.230892	-0.227415	-0.14697	0.345064	0.253864	0.206076	0.258422	0.104899	0.356142	0.394259	0.156998	0.366523
AC008915.2	-0.358764	-0.414584	-0.589938	-0.284524	-0.116285	0.0820976	-0.240322	-0.259527	-0.514811	-0.506488	-0.540118	-0.695322	-0.662174	-0.912497	0.0903295	0.262774	0.410584	-0.0630677	0.20128	-0.184763	0.0760304	-0.0913632	0.0820956	0.110223	-0.0426178	-0.268961	-0.218195	0.00532993
AC008937.1	0	0	0	0	0	0	0	0	0	0	0	0	0	0	0.0493912	-0.081735	-0.081735	0.0570743	-0.0154702	-0.0259623	0.0383755	-0.0259623	-0.0259623	-0.0259623	0.0642913	-0.0259623	-0.0259623	-0.0259623
AC008937.2	0.0506981	0	0	0	0	0	0	0	0	0	0	0	0	0.0316236	0.207568	0	0.00090073	0	0	0	0	0	0	0	0	0.055322	0	0
AC008937.3	0.00268714	-0.0167107	-0.0668953	0.0165228	-0.0294246	-0.0444782	-0.0973458	0.0360959	-0.0450232	-0.0516618	-0.0624833	0.0288522	-0.0787687	-0.0474772	-0.048001	-0.103699	0.104166	-0.234094	-0.164592	-0.0325897	-0.0346259	0.031088	0.0305405	0.0344347	-0.055795	-0.0102419	0.045889	-0.113231
AC008938.1	0.0282626	-0.0233706	-0.0173115	-0.00827647	-0.0107146	0.0046669	-0.00572565	0.0130098	0.000328292	0.0148178	0.0151467	0.0138948	0.0349786	0.0231648	0.0104951	0.0691541	0.0970708	-0.0657505	0.00900022	0.0142443	0.0110074	-0.00382746	0.00412981	0.0124192	0.0471442	0.0036765	-0.00119603	0.0259705
AC008940.1	0	0	0	0	0	0	0	0	0	0	0	0	0	0	0	0	0.0909515	0	0.079119	0	0	0	0	0	0	0	0	0
AC008945.1	-0.130458	-0.130458	-0.130458	-0.130458	-0.130458	0.0127392	-0.250996	-0.251907	-0.293392	-0.160679	-0.246394	-0.293392	-0.258821	-0.223837	-0.081068	-0.203891	-0.181352	-0.193604	-0.305018	0.191761	0.255576	-0.0645188	0.0778949	-0.116076	0.21507	0.0243568	-0.0386074	-0.0660961
AC008946.1	-0.61746	-0.203927	-0.315668	-0.602689	-0.611087	-0.483232	-0.383073	-0.751164	0.340739	-0.652385	-0.752681	0.161287	-0.4384	-0.627324	0.0196275	0.107919	0.718235	0.632459	0.904094	0.629805	0.0382916	0.603899	0.411061	0.387629	0.166135	0.0581794	-0.0700655	0.578622
AC008948.1	0	0	0	0	0	0	0	0	0	0	0	0	0	0	0	0	0.281583	0	0	0	0	0	0	0	0	0	0	0
AC008957.1	0	0	0	0	0	0	0	0	0	0	0	0.0546912	0	0	0	0	0	0	0.146842	0	0	0	0	0	0	0.144622	0.0599405	0.0500371
AC008957.2	0	0	0	0	0	0	0	0	0	0	0	0	0	0	-0.327467	-0.0969567	-0.327467	-0.327467	-0.327467	0	0	0	0	0	0	0	0	0
AC008966.1	0.00703119	-0.203429	-0.258158	-0.328631	-0.188306	0.0923628	-0.028198	0.133983	-0.100661	-0.015784	-0.0657863	-0.150817	-0.15096	-0.0254881	0.281064	0.287719	0.406439	0.835536	0.435726	-0.0203679	0.0619334	0.131993	0.0936606	0.154066	0.010078	-0.022207	0.224867	0.20151
AC008966.2	0.0233277	-0.162704	-0.243993	-0.0428658	-0.17151	-0.0267087	-0.136803	0.165233	0.322539	0.130981	0.0368254	0.129846	0.0843255	-0.0528804	0.509958	-0.173366	0.250461	0.212349	0.213345	-0.250245	-0.247056	-0.00398727	-0.12012	-0.145899	-0.0801023	-0.00736022	-0.160248	-0.197041
AC008972.1	0.174767	0.212068	-0.271574	0.162262	-0.101508	0.251893	0.246681	0.227884	-0.0594007	-0.0645898	-0.0867126	-0.136625	-0.0553826	-0.105785	0.544265	0.131168	-0.0148873	0.290878	-0.0394677	-0.387636	-0.638845	-0.197832	-0.285185	0.0165162	0.12125	-0.369921	-0.347306	-0.292619
AC008972.2	0.0714846	0.0842204	-0.142399	-0.253978	-0.093558	0.0640619	-0.204066	-0.13999	-0.404879	-0.443975	-0.362504	-0.603475	-0.517229	-0.312492	1.02225	0.785918	0.832602	0.914397	0.64193	0.0411647	0.0873147	-0.316335	0.214523	0.398099	0.136416	0.126726	0.249294	-0.291011
AC008982.1	-0.0663984	-0.0528423	-0.15934	0.0308585	0.0418081	-0.231927	-0.270943	0.0171919	0.0955252	-0.15421	-0.170536	-0.356576	-0.430997	-0.399264	-0.381749	0.11955	-0.664532	-0.335874	-0.453806	0.0823193	0.0705867	-0.158957	-0.177604	-0.268265	-0.287653	-0.506376	-0.377317	-0.561256
AC008991.1	0	0	0	0	0	0.0185163	0.0483634	0.110282	0.0512635	-0.0541711	0.00165996	0.183878	1.46397	2.27067	0	0	0	0	0	0	0	0	0	0	0	0.0654056	0.086762	0.186531
AC008991.2	0.0609803	0.182275	0.0653457	0	0	-0.0620598	-0.00159879	0.0050721	0.0997814	-0.0620598	0.00682149	0.279746	-0.0620598	2.00783	0	0	0	0	0	0	0	0	0	0	0	0.069074	0.157062	0.223796
AC008992.1	0	0	0	0	0	0	0	0	0	0	0	0	0	0.0341645	0	0	0	0	0	-0.0723487	-0.0723487	-0.0723487	-0.0723487	-0.0723487	0.0794952	0.0167017	-0.0723487	-0.0723487
AC008993.4	0.0403677	0.00421243	0.0123534	-0.0021149	-0.00261905	0	0	0	0	0	0	0	0	0.0606548	0.00300323	-0.000916517	0.00441429	0.00307811	0.00543929	-0.0245366	0.0982975	-0.0297777	-0.0265627	-0.000391201	0.00115891	0.0596228	-0.0548563	-0.0268526
AC009005.1	0.197612	0.0401703	-0.140462	0.176245	0.207031	-0.161331	-0.460288	-0.268025	-0.497641	-0.330892	-0.363015	-0.519319	-0.640076	-0.645349	0.00842811	0.0703445	0.302897	0.327147	0.570663	-0.304079	0.16134	0.204662	0.176727	-0.0703224	0.478588	0.190753	0.0571046	0.640557
AC009019.1	0	0	0	0	0	0	0	0	0	0	0	0	0	0	-0.211544	-0.332262	-0.465793	-0.114327	-0.46565	-0.074312	-0.122308	-0.122308	-0.0206683	-0.122308	-0.0261166	-0.122308	-0.122308	-0.014637
AC009021.1	0.0202803	0.0289698	-0.05282	-0.129227	-0.246481	0.307317	-0.616948	-0.24505	-0.707755	-0.386787	-0.608949	-0.707755	-0.579049	-0.58473	0.846585	0.155797	0.921598	0.165989	0.0327936	0.171828	-0.364168	-0.293458	0.219383	-0.0616485	0.123945	0.104139	-0.119682	-0.389053
AC009021.2	-0.0146321	-0.0255802	-0.00458575	-0.0324683	0.00144968	-0.0492262	-0.0658428	-0.0269332	-0.0529626	-0.0545803	-0.052526	-0.0658428	-0.0565111	-0.0492833	-0.00536874	-0.0476877	-0.0493539	-0.0779302	-0.099032	-0.0518414	-0.0397999	-0.0592925	-0.0357283	-0.0375439	-0.0437527	-0.0397221	0.0167926	-0.00693008
AC009034.1	-0.0787575	-0.227211	-0.153955	-0.227211	-0.163836	-0.529773	-0.643443	-0.136065	-0.643443	-0.596123	-0.643443	-0.643443	-0.546177	-0.598859	0.00117086	0.532807	0.199447	0.0019823	0.0953826	-0.0967637	-0.0967637	-0.0106436	-0.0967637	-0.0270774	-0.0293605	0.123935	-0.0967637	-0.0967637
AC009035.1	0	0.0718857	0	0.00262229	0	0.0108392	0.0327223	-0.0352741	-0.0352741	-0.0352741	-0.0352741	-0.00136725	-0.00750603	0.00335743	-0.246503	0.0294981	-0.335144	-0.0265846	0.31345	0.0518853	0.00203362	1.6e-05	0	0	0	0.0473643	0.0324706	0.0284998
AC009039.1	0	0	0	0	0	0	0	0	0	0	0	0	0	0	0	0	0	0	0	0	0	0	0	0	0	0	0	0
AC009041.1	0	0	0	0	0	0	0	0	0	0	0	0	0	0	0.135385	0	0	0	0	0	0	0	0	0	0	0	0	0
AC009041.2	-0.057864	-0.0371568	-0.0599808	-0.0389956	-0.102145	-0.0694712	-0.0068482	-0.0159109	-0.0733961	-0.115972	-0.143002	0.0568248	-0.0800983	0.0233079	0.181254	-0.0139259	-0.0326183	-0.148662	-0.0965411	-0.0420615	-0.104541	-0.0925889	-0.0128111	0.0395238	-0.00832808	0.0443949	0.525145	0.408793
AC009041.3	0	0	0	0	0	0	0	0	0	0	0	0	0	0	0	0	0	0	0	0	0	0	0	0	0	0	0	0
AC009053.2	-0.0292495	0.028299	-0.0838588	-0.0392718	-0.0607824	0.0289186	0.170481	0.0893555	0.158795	0.0420611	0.0315021	0.142298	0.206213	0.273594	-0.0908875	-0.0430439	0.017178	-0.00487738	-0.0616796	0.0821104	0.0247513	-0.00772286	0.0128065	0.0877443	0.0410528	0.0551492	0.292174	0.0909698
AC009053.3	0	0	0	0	0	0	0	0.0451519	0	0	0	0	0	0	0	0	0	0.119996	0.115596	0	0	0	0	0.0652624	0	0	0	0
AC009055.1	0	0.00139805	0	0.00718591	0	0.0602333	0	0	0	0	0	0	0	0	0	0	0.0922851	0.000104769	0.0795981	-0.00160714	-0.000487007	0.0153235	0.000867205	-0.00160714	-0.00160714	0.0393949	0.0958452	0.0112606
AC009055.2	-0.0812783	-0.0970417	-0.0808712	-0.067072	-0.0975997	-0.0251386	-0.0640118	-0.000587449	-0.0657987	-0.0115043	0.0229205	0.005986	0.142133	0.233454	-0.134752	-0.143929	-0.0320399	-0.0170644	-0.190055	0.0772365	0.0885333	0.0160446	-0.0348929	-0.0477749	-0.11012	-0.0912346	0.091969	-0.0747365
AC009060.1	-0.0172262	0.00326518	-0.0172262	0.0267943	0.055565	-0.0711195	-0.0208496	-0.0431599	-0.0131905	-0.0711195	-0.0711195	-0.0273507	-0.0711195	-0.0711195	0.00116377	-0.00204804	0.00202051	0.0321233	-0.000187882	0.0840946	0.0833075	-0.00222289	0.0212986	0.00116538	-0.06009	-0.0035916	-0.0299529	-0.00459024
AC009061.1	0	0	0	0	0	0	0	0	0	0	0	0	0	0	0	0	0	0	0	0	0	0	0	0	0	0	0	0
AC009061.2	-0.491566	-0.455968	-0.417948	-0.400529	-0.320906	-0.0352657	-0.0888131	-0.59879	-0.249615	-0.214531	-0.248739	-0.0956091	-0.534977	-0.817123	0.224947	0.333542	0.395282	0.107912	0.0333719	0.139793	0.281918	0.487998	0.299375	0.369272	0.0278434	0.37279	0.0623521	0.0467279
AC009063.1	0	0	0	0	0	0	0	0	0	0	0	0	0	0	0.0983929	0	0	0	0	0	0	0	0	0	0	0	0	0
AC009063.2	-0.0386047	-0.0386047	0.0067077	-0.0386047	-0.0386047	0	0	0	0	0	0	0	0	0.0386324	0.224824	0	0.072138	0	0.20259	0	0	0	0	0	0	0	0	0
AC009063.3	0.108132	0	0	0	0	0.0348127	0.517065	0.274013	0.308143	0.116559	0.215941	0.916124	0.0402201	0	0	0	0	0	0.12967	-0.0496182	0.067069	-0.0496182	0.166813	0.132572	0.147118	0.00576548	-0.0496182	0.0109783
AC009065.1	0.141022	0.115647	0.148233	0.21593	0.109114	-0.108359	-0.0567505	-0.070003	-0.0213578	-0.077182	0.0208711	-0.0375334	0.135623	0.266392	-0.0154649	0.0516461	0.121711	-0.0712242	0.0610363	0.0708441	-0.0175856	0.0641764	-0.0210088	-0.0209357	0.0962596	0.0382312	0.0339127	-0.0278589
AC009065.3	8.75439e-05	3.2316e-05	8.63836e-05	7.75668e-05	7.25489e-05	0	0	0	0	0.032432	0	0	0.0637468	0	0.000436415	7.47e-05	-0.000300443	0.305558	0.441588	0	8.05e-05	0.000187276	0.0499989	5.17e-05	0.000168336	6.62e-05	7.49e-05	0.000159848
AC009065.4	0.425865	-0.141989	0.10204	0.25639	0.217683	-0.287538	0.0873478	0.0929849	0.355406	-0.210163	-0.288098	0.203427	0.466442	0.269466	0.976143	0.396303	1.45733	0.733348	0.963773	-0.668206	-0.298852	-0.489183	-0.582962	-0.38938	-0.552784	-0.206173	-0.49877	0.00611376
AC009065.6	0.0737078	0.137812	0	0.0805572	0.0688368	0	0.0670807	0.0637393	0	0.0500036	0	0	0	0.0382272	-0.0338156	-0.770062	0.153276	-0.672507	-0.365239	0.104315	0	0	0	0	0.115042	0	0.0939097	0
AC009065.7	0	0	0.0496823	0.0914227	0	0	0	0	0	0	0	0	0	0.0235767	0.000521176	0.000446873	0.000605743	0.000159081	0.000482863	0	0	0	0	0	0	0	0.0659727	0.0511513
AC009065.8	0.0686392	0.103273	0.0964595	-0.0304824	-0.0751777	-0.00455349	0.0147494	-0.00149197	-0.0404317	0.0920583	0.168079	-0.0771508	0.340697	0.391401	-0.150175	0.064646	-0.120819	-0.592541	-0.727138	-0.0975331	-0.178324	-0.0704498	0.0449658	0.0456561	-0.208964	-0.135895	-0.148969	-0.190897
AC009075.1	0	0	0	0	0	0	0.0862732	0	0	0	0	0	0	0	0	0	0	0	0	0	0	0.23773	0	0.114788	0	0	0	0
AC009081.1	0	0	0	0	0	0	0	0	0	0.0404504	0	0	0	0	0.113318	0.108233	-0.000707121	0.344292	-0.000918143	0	0	0	0	0	0	0	0	0
AC009086.2	-0.139181	-0.614198	-0.731117	-0.300701	-0.040923	0.138378	0.135769	0.326831	0.392032	-1.17293	0.537237	0.712192	-1.2095	-1.2095	-0.668993	1.39272	1.3549	-0.191119	1.13908	0.520834	0.658696	0.906527	0.593537	0.900298	-0.575311	0.390154	0.429692	1.65887
AC009087.1	0.201809	0.0187303	0.0167356	-0.0882719	-0.0882719	-0.102145	-0.102145	0.00345671	-0.102145	-0.02994	-0.102145	-0.102145	-0.0279852	-0.0493761	0.123777	-0.189138	-0.407473	-0.442427	-0.449122	0.100934	0.123453	0.238234	-0.386665	0.000551483	0.0927009	-0.225523	-0.533574	-0.453266
AC009088.1	0.0207109	-0.148679	-0.122572	-0.0609964	-0.0690333	-0.0265509	-0.169932	-0.108037	-0.143616	-0.0574414	-0.0797353	-0.0231099	-0.132173	-0.0752972	-0.125607	-0.243481	0.0500592	-0.26294	-0.114534	-0.0170885	-0.172441	-0.0419306	-0.0324348	-0.0477901	-0.0371506	0.00406139	0.0397561	-0.101404
AC009088.2	0.00568971	0.0178424	-0.0605607	0.0179863	-0.0605607	-0.147151	-0.0830721	-0.147151	-0.147151	-0.147151	-0.147151	-0.0679292	-0.147151	-0.147151	0.00110542	-0.000408117	0.00105427	-0.000428555	-0.000412386	0.0820521	0	0	0.118393	0	0	0	0	0
AC009088.3	0	0	0	0	0	0	0	0	0	0	0	0	0	0.0482714	0	0	0	0	0	0	0.225076	0	0	0	0	0	0	0
AC009090.2	0	0	0	0	0	0	0	0	0	0	0	0	0	0	0	0	0	0	0	0	0	0	0	0	0	0	0	0
AC009090.3	0	0	0	0	0	0	0	0	0	0	0	0	0	0	0.465387	-0.0228807	0.223909	0.408359	0.448827	0	0	0	0	0	0	0	0	0
AC009093.1	0.157107	0.232058	-0.025501	0.449411	-0.0659248	-0.021004	0.142627	0.110489	0.0415488	0.127857	0.0940473	1.08984	1.10367	0.526902	-0.162155	-0.0601253	0.122513	0.884417	0.900842	0.567307	0.644648	1.02231	1.00608	1.05154	1.24214	1.10842	1.1128	1.23344
AC009093.2	0.176355	-0.0124172	-0.0639176	0.0672366	0.0818404	-0.143916	-0.0074878	-0.094419	0.0607182	-0.0803163	-0.076262	-0.051643	-0.142555	-0.092967	0.140763	0.205421	0.265382	1.07862	1.05803	-0.03262	-0.03262	0.103998	0.205573	0.0533084	0.0275294	0.110746	0.0961601	0.00601888
AC009093.4	-0.0445763	-0.0445763	-0.0445763	0.0132746	0.00845994	0.0352823	0.0487863	0	0	0	0	0.334052	0.0339855	0.08925	-0.208047	0.0717949	-0.28156	-0.0732887	-0.0639436	0.119828	0	0.258265	0.166363	0.0667168	0.320856	0.117531	0.0816246	0.0613624
AC009093.5	0	0	0.110372	0.121916	0	0	0	0	0	0	0	0	0	0	0	0	0	0	0	0	0	0	0	0	0	0	0	0
AC009093.6	0.169289	-0.0591657	-0.248908	-0.0532029	-0.0165866	0.136352	-0.105651	0.233984	0.232303	0.0426894	0.0399468	0.1271	0.158527	0.0704948	-0.00520914	-0.0250283	0.35459	-0.0132523	0.432185	-0.15797	-0.00596097	-0.236964	0.136028	0.00296414	0.341991	-0.109592	0.111124	-0.116068
AC009095.1	0.0169508	0	0.016808	0	0.0158455	-0.0319177	-0.0158081	-0.0319177	-0.0319177	-0.0319177	-0.0319177	-0.0319177	-0.0319177	-0.00918238	-0.00569719	-0.00482357	0.0302815	1.84e-05	0.0028913	0.020094	0.0274263	0.0476782	0.0317573	0.0427503	0	0	0	0
AC009097.1	0	0	0	0	0	0	0	0	0	0	0	0	0	0	0.183368	0.222766	0.353162	0.189572	0.00058691	0	0	0	0	0	0	0	0	0
AC009097.2	0	0	0	0	0	0	0	0	0	0	0	0	0	0	0	0	0	0	0	0	0	0	0	0	0	0	0	0
AC009097.3	-0.0194698	-0.0194698	0.00493841	0.00309168	-0.0194698	0	0	0	0	0	0.0204606	0	0.0182181	0.0171884	0	0.0950745	0.129824	0.120692	0.0585959	0.0365456	0.0380234	0.0508459	0.0270944	0.0268156	0	0.0295428	0.187366	0
AC009097.4	0.110794	0.0351219	0.00480818	0.0703526	0.0641926	-0.051373	0.041687	-0.0566403	-0.0643061	-0.101483	0.0302205	-0.12283	0.242759	0.0498861	-0.108187	-0.0391868	-0.24005	-0.337888	0.0218752	0.0795904	0.0659748	0.166916	0.0138516	-0.0319613	0.0401787	0.155564	-0.0319613	0.117897
AC009102.2	0.014249	0.0166009	-0.0112298	0.00330529	0.0134606	0.0133057	-0.0125865	-0.0125865	-0.0125865	-0.0125865	0.0018222	-0.0125865	-0.00193019	-0.00253816	0	0.0758488	0	0	0	0.022409	0.0332849	0.017796	0.0251014	0.0191956	0.0233873	0	0	0
AC009107.1	0	0	0	0	0	0	0	0	0	0	0	0	0	0	0	0.241012	0	0	0	0	0	0	0	0	0	0	0	0
AC009107.2	-0.112445	-0.163166	-0.113093	-0.116367	-0.0198788	0.193776	0.201917	0.258276	0.115139	0.172524	0.260573	0.556192	0.460277	0.394347	0.195809	-0.361049	0.120643	0.0160721	0.00297956	-0.198426	-0.102811	-0.326841	-0.206829	-0.185484	-0.293371	-0.123192	-0.174693	-0.0713759
AC009108.2	0	0	0	0	0	0	0	0	0	0	0	0	0	0	0	0	0	0	0	0	0	0	0	0	0	0	0	0
AC009108.3	0.0435036	0.0551712	-0.00311318	0.0746134	0.0482474	0.00922014	-0.0386832	-0.0189287	-0.0260943	-0.0160565	-0.0228899	-0.0211293	-0.0273416	-0.0251509	0.0562678	-0.0115803	0.157159	-0.0132385	-0.0464964	0.0249682	-0.00196598	0.00648951	-0.00137615	-0.0045034	0.0153274	0.01878	0.0455005	-0.0139117
AC009110.1	0	0	0	0	0	0	0	0	0	0	0	0	0	0	0	0	0	0	0	0	0	0	0	0	0	0	0	0
AC009113.1	0.204054	-0.0218426	-0.065499	0.0463591	-0.100081	-0.0391857	-0.0709567	-0.229026	-0.22976	-0.0422329	-0.0621665	-0.17999	-0.0937482	-0.13199	-0.299739	-0.453437	-0.591758	-0.0108737	-0.102725	0.190547	0.28505	0.359157	0.221064	0.331112	0.232268	0.128206	0.460359	0.245488
AC009113.2	-0.076778	-0.076778	-0.076778	-0.076778	0.00839102	0	0	0	0	0	0	0	0	0	0	0	0.0033682	0	0.185523	0	0	0	0	0	0	0	0	0
AC009117.2	0	0	0	0	0	0	0	0	0	0	0	0	0	0	0	0	0	0	0	0	0	0	0	0	0	0	0	0
AC009117.3	0	0	0	0.0494336	0	0.0368261	0	0	0	0	0	0	0.0741452	0.0370996	-0.158184	-0.158184	-0.0180941	-0.158184	-0.158184	0	0	0	0	0	0	0	0	0.126976
AC009118.1	0.0157015	0.025376	0.207475	0.121028	0.106724	0.20473	0.229332	0.371747	0.337896	0.258544	0.412806	-0.0997254	0.0153617	0.343636	0.00129678	-0.194276	-0.355453	-0.402756	-0.604972	0.0717272	-0.133715	0.0387519	-0.0994577	-0.0521188	-0.237305	0.130525	-0.243566	-0.291104
AC009118.2	-0.420997	-0.531954	-0.626379	-0.468874	-0.404163	-0.701362	-0.534718	-0.358293	-0.883171	-0.520489	-0.459516	-0.558336	-0.828949	-0.705719	-0.350457	-0.234433	-0.646273	0.30449	-0.468891	-0.0319815	-0.00272137	-0.0391727	-0.505459	-0.514147	-0.613647	-0.606488	-0.832794	-0.632797
AC009118.3	0.19202	0.0950204	0.338771	0.0879816	0.082242	-0.134622	-0.0289802	-0.0989283	-0.125973	-0.0863835	-0.0945932	-0.153712	-0.0681544	-0.0761068	-0.290171	-0.392672	-0.0625171	-0.417285	-0.0432002	-0.00488222	-0.161849	-0.0428246	-0.193069	-0.000347675	0.026356	-0.000613799	-0.0695637	-0.146123
AC009119.1	0.101398	0	0.0925566	0.00148298	0	0	0	0	0	0	0.179475	0.11025	0.0337438	0.025795	-0.602751	-1.0035	0.0429946	-0.892132	-0.723655	-0.000981084	-0.000981084	0.128806	0.156442	-0.000981084	-0.000981084	0.0592727	-0.000981084	-0.000981084
AC009119.2	-0.228059	-0.0314294	-0.322823	-0.109539	-0.276295	0.11548	0.15264	0.276191	0.304882	0.268956	0.186576	-0.119764	0.478653	0.587318	0.59695	0.782553	0.0568096	0.270523	0.662407	-0.0944731	0.250975	0.182915	0.267263	0.673967	-0.0391421	0.261438	0.782734	-0.00383974
AC009119.3	0	0	0	0	0	0	0	0	0	0	0	0	0	0.0487621	0.490313	1.69398	1.18458	0.510551	1.0071	0	0	0	0	0	0	0	0	0
AC009120.3	0.0561049	0.0582934	0	0.172221	0	-0.114241	-0.00394535	-0.0612958	-0.114241	-0.0681605	-0.00240387	-0.114241	-0.114241	-0.114241	0.193851	0.518377	0.328338	0.181545	-0.0615851	0	0	0	0	0.066088	0	0.190167	0.0786039	0.185529
AC009120.4	0.338297	0.0750973	0.0679911	0.0752556	0.0642625	0.0457923	0.0615084	0	0.51325	0.183159	0.0586303	0	0.0511104	0.0311502	-0.193739	0.0816091	0.134214	-0.193552	0.407411	-0.065133	-0.0643309	0.0182172	-0.0651371	-0.0651371	0.138264	-0.0651371	0.0384799	0.0885358
AC009120.5	-0.117364	-0.102932	-0.121151	-0.0420555	-0.0778644	0.0542916	0.186684	0.0328847	0.104551	0.0558062	0.0439666	0.142176	0.0650427	0.00188918	0.330262	0.0808502	0.211639	0.0910313	0.0757138	0.0860426	0.0411041	0.0374984	0.183676	0.159622	0.0104133	0.0601956	0.0716028	0.0498261
AC009121.1	0	0.0205953	0	0.0198053	0	0	0	0	0	0	0.0230299	0.0196598	0	0	-0.0591599	-0.112471	-0.0396692	0.00220899	0.00370517	0	0	0	0	0	0	0	0	0
AC009121.2	0.080213	0.0303925	-0.256673	-0.047023	-0.152118	0.0369833	-0.0379917	-0.230999	0.0891915	0.0383219	-0.0491277	-0.166725	0.0929194	-0.200566	-0.154983	-0.337303	0.149971	-0.423673	0.396659	0.292951	-0.111522	0.0637405	0.136184	0.41317	0.523041	0.251788	0.32102	0.0422997
AC009123.1	-1.48597e-05	-1.48597e-05	0.0081926	0.00733847	-1.48597e-05	0	0	0.00821383	0.0311293	0.031639	0.033975	0	0.00644138	0.00478259	-0.0578714	-0.108221	-0.0838306	-0.101943	-0.0537324	-0.0354203	-0.0320353	0.00534188	-0.0239017	-0.0216378	-0.030862	-0.0254274	0.00633534	-0.0218002
AC009126.1	-0.130292	-0.060039	-0.21459	-0.0981618	-0.148113	-0.0295644	0.0686181	0.0429718	-0.190666	-0.0876599	-0.00709667	0.0593118	-0.115877	0.000806765	-0.137227	0.199355	-0.103592	-0.0111022	0.00846659	0.15319	0.159538	0.489736	0.297692	0.344093	0.103873	0.156658	0.422141	0.115531
AC009133.1	0.420351	0.818992	0.421622	0.767296	0.241194	-0.222072	0.365317	0.222445	0.181343	-0.0235326	-0.0276328	-0.164684	0.333722	0.464995	0.00173103	-0.0413521	-0.0634921	-0.00736348	0.193094	-0.139594	0.233836	1.07656	1.08933	0.82071	1.38246	1.21216	1.13464	1.20887
AC009133.2	0.222094	0.051689	0.291455	0.426884	0.22888	-0.211032	-0.0128194	-0.191478	0.111838	-0.0868641	-0.200513	-0.197555	-0.173096	-0.218128	-0.0271006	-0.155752	0.00414573	-0.157617	-0.157555	0.0377814	-0.0817041	-0.163107	-0.0267741	-0.163107	-0.163107	-0.0994125	-0.163107	-0.0994921
AC009133.3	-0.0160573	0.00305443	0.0260188	0.0742449	0.0136104	0.0776186	0.170836	-0.0422135	0.153017	0.269814	0.269095	0.121176	0.421164	0.100176	0.483344	0.316111	0.436059	0.608559	0.297203	0.155533	0.0490885	0.143716	0.248692	0.052132	0.0780489	0.0637146	-0.0307598	0.0940486
AC009133.4	0.0149442	0.00410639	-0.0391976	0.225003	0.225602	-0.34083	0.0569863	-0.0482925	-0.195846	-0.22529	-0.233651	-0.243806	-0.202392	-0.202929	-0.000129247	0.005259	-0.00217234	0.119509	0.117215	0.276117	-0.0325643	-0.000971394	0.0733025	0.206674	0.389842	0.0694689	-0.10849	-0.079473
AC009133.6	0.213888	0.0517163	0.0281894	0.131269	0.0748459	-0.0500107	-0.113314	-0.0908064	-0.108301	-0.100768	-0.116108	-0.173865	-0.179646	-0.175169	-0.132016	-0.0595721	-0.0653429	-0.0990648	-0.0990969	0.0798264	0.107275	0.178367	0.11814	0.210193	0.133178	0.00289016	0.269913	0.0857274
AC009134.1	0	0	0	0	0	0	0	0	0	0	0	0	0	0	0	0	0	0	0	0	0	0	0	0	0	0	0	0
AC009137.1	0	0	0	0	0	-0.209765	-0.209765	-0.209765	-0.209765	-0.0815131	-0.209765	-0.209765	-0.209765	-0.209765	0.346412	6.87e-06	2.58e-06	7.29e-06	2.14e-06	0	0	0	0	0	0	0	0	0
AC009139.1	0	0	0	0	0	0	0.0775234	0	0	0	0	0	0	0	0	0	0	0	0	0	0	0	0	0	0	0	0.187384	0
AC009139.2	0.05211	-0.0521121	-0.0521121	-0.0010468	-0.0012868	-0.195556	-0.194666	-0.134141	-0.2469	-0.249113	-0.243382	-0.288223	-0.288223	-0.288223	-0.105582	-0.106563	-0.10407	-0.106847	-0.106112	0.0375782	-0.0397471	0.121733	0.0110586	-0.0108243	-0.0109199	0.108992	0.455517	0.0435143
AC009142.1	0	0	0	0	0	0	0	0	0	0	0	0	0	0	0	0	0.345414	0.121706	0	0	0	0	0	0	0	0	0	0
AC009145.3	0	0	0	0	0	0	0	0	0	0	0	0	0	0	0	0	0	0	0	0	0	0	0	0	0	0	0	0
AC009148.1	0.0371711	0.00667728	0.035412	0.0616136	-0.0173329	-0.0537538	-0.0511089	-0.00315836	-0.0384834	-0.0251074	-0.0420739	-0.0519554	-0.0181503	-0.0265371	-0.0825331	-0.0560317	-0.0893311	-0.144481	-0.05645	0.0886806	0.0798128	0.0690837	0.0552417	0.0548315	0.0903401	0.0559556	0.0806322	-0.0106425
AC009154.1	0.0569825	0.0620826	0.0609807	0.168011	0.326453	0.549563	-0.00253591	0.00371027	0.631041	0.030481	-0.0591761	-0.0591761	0.0233635	0.0431203	0.131969	0.260892	0.300372	0.140406	0.26185	0.0488907	0.155785	-0.084595	-0.0172608	0.0584164	0.332951	0.107928	0.087839	-0.0137335
AC009154.2	0	0	0	0	0.0355574	0	0	0	0	0	0	0	0	0	0	0	0	0	0	0	0	0	0	0	0.118772	0.0449875	0	0
AC009158.1	-0.00929481	-0.00927158	-0.00929481	-0.00929481	-0.00929481	0	0.31947	0	0	0	0	0	0	0	-0.587006	-0.587006	-0.587006	-0.587006	-0.204957	-0.00980841	-0.00980841	-0.00980841	0.0820607	-0.00980841	-0.00980841	0.225548	0.579171	0.20049
AC009159.1	0.0480864	0.0415577	0	0	0	0	0	0	0	0	0.0431071	0	0.0284743	0	0	0	0	0	0	0	0	0.103474	0	0	0	0	0	0
AC009159.2	0.0523004	0.0452008	0	0	0.0458672	0	0.44425	0	0.563824	0.0726412	0	0	0	0	0	0	0.123156	0	0	0.105419	0	0.181186	0	0.201805	0.323953	0.107276	0.137191	0.109795
AC009159.3	0.108946	0.10653	-0.0411291	0.157617	0.0678576	-0.168899	0.0237437	-0.13474	-0.193758	-0.120941	-0.119673	-0.252356	-0.240571	-0.209871	0.0836304	0.0775245	0.163123	0.0788554	0.300766	-0.035975	-0.0744154	0.0378984	0.0268031	0.194533	0.529371	0.109449	0.320148	0.036385
AC009163.1	-0.0426491	-0.0426491	-0.0133873	-0.0424739	0.00512096	0.0910793	0	0.0448034	0	0.0364917	0	0	0	0.0277643	0.325094	-0.0065428	0.173858	-0.0022459	0.0262385	6.65e-05	-3.03e-05	0.00491715	8.57e-05	0.0568055	1.01e-05	0.091786	-3.03e-05	0.231567
AC009163.2	0.0138227	-0.0117144	0.0112021	-0.00944635	-0.0102447	0.00952157	0.0182499	0.0203293	0.0287357	-0.00935771	0.0102069	0.0253604	1.47917	5.25465	-0.00247945	0.0183468	0.0183758	0.00695164	0.0540229	-0.00383108	0.00113577	-0.00547515	-0.0121744	0.0238626	0.0330616	0.00589176	0.0812429	0.00639854
AC009163.4	0.177926	0.414949	-0.194466	-0.106632	-0.122329	0	0	0	0.399408	0.408106	0.303558	0.365074	0.621051	0.141518	-0.042153	-0.0335539	0.589388	0.31185	0.290327	0.446139	-0.00120487	0.0957738	-0.00168751	-0.00300498	0.00205714	0.152194	0.323864	-0.00331984
AC009163.6	0	0.122804	0	0	0	-0.11499	-0.11499	-0.11499	-0.11499	-0.11499	-0.11499	-0.11499	-0.11499	0.0191396	0.227254	0	0	0	0	0	0	0	0	0	0	0	0.148065	0
AC009163.7	0.118483	0.047779	0.0581353	-0.0334818	-0.0313285	-0.122263	-0.25418	-0.195345	-0.315696	-0.224674	-0.223673	-0.201636	-0.214975	-0.239213	0.021138	0.029195	-0.0669226	0.138452	-0.0748618	-0.00498327	-0.0162736	0.137628	0.00457696	0.0844909	0.135372	0.0167251	0.047927	0.141359
AC009166.1	0.15304	0.0835991	-0.105341	0.250073	0.119065	0.148626	0.080504	0.166493	0.053801	0.0459838	0.0594806	-0.18235	-0.00897211	-0.103833	0.00183549	-0.0233951	-0.298767	0.199625	-0.155497	-0.0359109	0.216176	-0.123616	0.13098	0.0975538	0.167361	0.075394	0.403957	0.0727351
AC009167.1	0.0155761	-0.038576	-0.0629648	0.010547	-0.0374691	-0.0940004	-0.0940004	-0.0423096	-0.0940004	-0.0940004	-0.0940004	0.208016	0.208743	0.197471	-0.1127	-0.46554	-0.411671	-0.56716	-0.49244	-0.0184916	0.0207614	0.0144011	-0.0104787	0.0897978	0.0588089	0.0269115	0.0269482	0.080022
AC009171.2	-0.507288	-0.0522326	-0.486011	-0.0766361	-0.140892	0.145824	0.566161	0.38314	0.921428	0.593468	0.572671	0.567005	1.06251	0.676205	-0.274338	-0.683497	-0.830833	-0.70551	-0.976762	-0.618794	-0.0361808	0.0249926	0.190772	-0.428814	-0.602855	0.322719	-0.342369	0.024348
AC009185.1	-0.0167558	0.0842251	-0.0154417	0.00671936	0.00394247	-0.0936064	-0.0366522	-0.0736308	-0.0889146	-0.0708866	-0.0681062	0.00358447	-0.0390931	-0.0214839	-0.209515	0.0551923	0.0721868	0.0403846	0.206082	0.0172536	-0.0183678	-0.00830198	0.0225702	-0.0446284	-0.0345058	-0.0469911	0.164899	0.126464
AC009226.1	0.0670251	0.293361	0.257363	0.219471	-0.222035	0.266058	0.36175	0.172062	-0.0547049	0.0714258	0.133462	0.305949	0.360493	0.430135	0.188337	0.104275	0.401933	0.0553774	0.309256	0.0816921	0.212494	0.0882223	0.247288	0.334924	0.0808611	0.189124	0.160521	0.227702
AC009227.1	-0.0120236	-0.0133947	0.0126831	-0.00434906	-0.0119132	0.0113106	0.0315269	0.00933675	0	0	0.017433	0.0418563	0.0135896	0.00533554	0.00896595	-0.00638734	0.0436253	0.0456311	-0.00444691	0.0372788	0.0262178	0.0206093	0.0404925	0.0352125	0.0184648	0.00016769	0.0235498	0.0168457
AC009227.2	0	0	0	0	0	0	0	0	0	0	0	0	0	0	0	0	0	0	0	0	0	0	0	0	0	0	0	0
AC009228.1	0	0.170996	0	0	0	0	0	0	0.0632952	0	0	0.3084	0.142025	0.144612	0	0.374533	1.24e-06	0	0.703941	0	0	0.289904	0	0	0	0	0.319687	0.251204
AC009229.1	-0.0381978	0.0113767	-0.0381978	-0.0381978	-0.0381978	0	0	0.0466198	0	0	0	0	0.0355467	0.0214814	0	0	0.119228	0	0	0.0673727	0	0.0627708	0.115397	0.0502078	0.1431	0	0.0709527	0
AC009229.2	-0.0984415	-0.0984636	-0.0984636	-0.0984636	-0.0984636	0	0	0.114953	0	0.0804569	0.407681	0	0	0	0.375477	0	0	0.23223	0	0.000638978	0	4.59e-05	0.2651	0	0.171913	0.415471	0	0.113246
AC009229.3	-0.277096	-0.277096	-0.277096	-0.277096	-0.277096	0	0	0.143715	0	0	0	0	0.20456	0	0	0	0	0	0	0	0	0	0	0	0	0	0	0
AC009234.1	0	0	0	0	0	0	0	0	0	0	0	0	0	0	0	0	0	0	0	0	0	0	0	0	0	0	0	0
AC009237.14	0.137137	-0.0967972	-0.110754	-0.127695	-0.331927	0.167607	0.197544	0.19915	-0.0891511	-0.154886	-0.171262	-0.211925	-0.219488	-0.3283	0.189812	0.318809	0.520615	0.580417	0.600046	0.211841	0.275906	0.451357	0.448864	0.493769	0.45603	0.332584	0.744252	0.367244
AC009237.15	0.54215	-0.00307347	-0.109987	-0.327157	-0.46466	0.725218	0.966648	0.805527	-0.00699206	0.328247	0.436434	0.465843	-0.00078957	0.0978131	-0.181914	0.570115	0.715181	0.622273	0.827398	0.11143	0.272677	0.265669	0.460839	0.691323	0.548269	0.784392	0.960524	0.413799
AC009242.1	-0.00200769	-0.0113239	-0.0190066	-0.0119251	-0.0113615	-0.00998805	-0.0151457	-0.000236309	-0.00141607	-0.0151457	-0.00683708	-0.00411678	1.08203	4.33637	-0.113372	-0.187657	-0.106991	-0.130382	-0.196199	-0.0109455	-0.0112029	-0.0149375	-0.0220651	-0.0367069	-0.0188906	-0.0170196	0.0347106	-0.00959794
AC009262.1	0	0	0	0	0	0	0	0	0	0	0	0	0	0	0	0	0	0	0	0	0	0	0	0	0	0	0	0
AC009264.1	0.0994254	0.0591736	0.0433379	0.0018461	0.0343993	-0.107329	-0.124473	-0.113397	-0.209159	-0.218736	-0.272978	-0.222206	-0.252242	-0.220397	-0.0290479	-0.173625	0.37406	-0.0524695	-0.39669	-0.0673669	-0.0262453	-0.0894776	-0.00126968	-0.0786603	-0.0832113	0.0211055	0.0322588	-0.0516146
AC009269.2	-0.00529837	-0.0694758	-0.0694758	-0.0694758	-0.0694758	0	0	0	0	0.0476043	0	0	0.0827122	0	0.16291	-0.132777	0.0376884	-0.132767	0.180013	0	0.149717	0	0.0905027	3.72e-06	0	0	0	0
AC009269.3	0.0896856	-0.0649412	-0.0649412	0.0205868	0.0134208	0	0	0	0	0.219528	0.0760909	0.0707749	0.0570095	0.0348598	0	0	0	0	0	0	0.165701	0.243094	0	0	0	0	0	0
AC009271.1	0	0	0	6.34301e-05	0	0.259607	0	0	0	0.0488191	0.313055	0	0	0	0.120443	0.109695	-0.00466797	0.128076	-0.0126629	-0.000184183	0.000353146	0.0790965	-7.35e-05	0.0789754	-0.000184183	0.0678256	-0.000184183	0.0741516
AC009275.1	-0.225364	-0.186902	-0.297836	-0.14231	-0.289198	-0.0323146	-0.0522805	-0.358739	-0.0248807	0.173897	0.244995	0.759128	-0.170902	0.013688	-0.599727	-0.563381	-0.365825	0.308413	-0.0970571	-0.422592	-0.334652	-0.474643	-0.166035	-0.0402815	-0.192644	-0.281792	-0.517699	0.0686479
AC009276.1	0	0	0	0	0	0	0	0	0	0	0	0	0.137839	0	0	0	0	0	0	0	0	0	0	0	0	0	0	0
AC009283.1	0.117968	0.0594382	0.159959	0.41179	-0.200704	0.237174	0.0885676	0.151592	-0.0766044	-0.0542792	0.0158931	-0.139124	0.0401624	-0.0651132	0.507556	0.338495	0.675473	-0.210565	0.608971	-0.0586208	0.116509	0.0485561	0.0615428	0.278054	0.437954	0.520005	0.650877	0.188352
AC009292.1	0	0	0	0	0	0	0	0	0	0	0	0	0	0	0	0	0	0	0	0.00301453	-0.0105162	-0.0105162	-0.0105162	-0.0105162	-0.0105162	-0.0105162	-0.0105162	-0.0105162
AC009299.3	-0.0237791	-0.0237791	-0.0237791	-0.0237791	-0.0237791	0	0	0	0.0428808	0	0	0	0.0216573	0.0300629	-0.153079	0.0939951	0.0505746	-0.02412	-0.0978055	0	0	0.033585	0	0	0	0	0	0
AC009303.2	0	0	0	0	0	0	0	0	0	0	0	0	0	0	0	0	0.163626	0	0.0546425	-0.0460393	-0.0460393	-0.0460393	-0.00524249	-0.0460393	-0.0460393	-0.0460393	-0.0460393	-0.0460393
AC009303.3	0	0	0	0	0	0	0	0	0	0	0	0	0	0	-0.106828	-0.106828	-0.106828	-0.106828	-0.106828	0	0	0	0	0	0	0	0	0
AC009305.1	0	0	0	0	0	0	0	0	0	0	0	0	0	0	0	0	0	0	0	0	0	0	0	0	0	0	0	0
AC009309.1	-0.324559	0.0615821	-0.463312	0.0664893	-0.22972	-0.44827	-0.418661	-0.810731	-0.247699	-0.79083	-0.673718	-0.721975	-0.637294	-0.929472	-0.576311	-0.634872	-0.230534	-0.189431	-0.246598	-0.2722	0.0238854	-0.117327	0.123789	-0.195741	-0.345404	0.0533296	-0.385425	-0.179831
AC009312.1	-0.0297263	0.0159293	-0.0804151	-0.0323328	-0.0311444	1.19843	-0.0517725	1.27073	0.555502	-0.0573907	-0.0954258	-0.0411407	-0.0220254	-0.012381	-0.109869	0.37405	0.592611	0.243474	0.123949	-0.0958192	-0.135107	0.112825	-0.0510594	-0.135107	-0.135107	-0.135033	0.280316	0.180628
AC009313.1	0	0	0	0	0	0	0	0	0	0	0	0	0	0	0	0	0	0	0	0	0	0	0	0	0	0	0	0
AC009318.1	0.0468892	-0.113748	0.00905463	-0.117918	-0.138075	0.357751	0.0900462	0.0838591	0.0144299	0.147656	0.108296	0.231735	0.184777	0.294079	-0.167463	-0.255522	-0.177083	-0.113184	-0.00389764	0.207871	0.120924	-0.00407446	-0.0369128	0.0230018	0.0213484	0.136594	-0.0925225	-0.0862322
AC009318.2	0.473172	-0.126884	0.0463685	-0.0369733	-0.233622	0.520886	0.318372	0.355333	0.388338	0.0646081	0.0832909	0.616176	0.381529	0.336221	0.0572232	0.35443	0.446183	0.408564	0.608285	-0.197152	-0.127217	0.137273	0.149975	0.467118	-0.517868	-0.12879	0.347423	0.329587
AC009318.3	0.0306113	0.108599	-0.0318411	0.0883171	-0.35047	-0.157716	0.379251	0.218292	0.147492	0.0309492	0.0294764	0.468167	0.090575	0.0377923	0.322036	0.202787	0.289574	0.320131	0.819453	0.162853	0.253525	0.44369	0.369288	0.287502	0.459771	0.371364	0.19143	0.13891
AC009318.4	0.187663	0.0724397	0.065565	0	0	-0.0181351	0.0572469	0.00508079	0.0529418	0.121706	0.1238	0.0874396	0.347701	0.474649	0	0.143402	0	0	0	-0.18872	-0.0700316	-0.264935	-0.154588	-0.264935	-0.264935	-0.119853	-0.264935	-0.264935
AC009320.1	0	0	0	0	0	0	0	0	0	0	0	0	0	0	-0.274297	-0.0682727	-0.274297	0.191578	-0.0304712	0	0	0	0	0	0	0	0	0
AC009336.1	0	0	0	0	0	0	0	0	0	0	0	0	0	0	0	0	0	0	0	0	0	0	0	0	0	0	0	0
AC009336.2	0	0	0	0	0	0	0	0	0	0	0	0	0	0.00300843	3.49e-05	0	0	0.00577297	0	0	0	0	0	0	0	0	0	0
AC009365.1	0	0	0	0	0	0	0	0	0	0	0	0	0	0	0	0.109734	0	0	0	0	0	0	0	0	0	0	0	0
AC009365.2	0	0	0	0	0	0	0	0	0	0	0	0	0	0	0	0	0	0	0	0	0	0	0	0	0	0	0	0
AC009365.3	0	0	0	0	0	0	0	0	0	0	0	0	0	0	0.08425	0	0	0.0801711	0	0	0	0	0	0	0	0	0	0
AC009387.1	0	0.0850248	4.9724e-05	0	0	0	0	0	0	0	0	0	0.0533322	0.0504446	-0.180502	-0.354267	-0.35908	-0.359272	-0.073501	0	0	0.000118552	0	0	0	0	5.89e-05	0.0892641
AC009396.1	0	0	0	0	0	0	0	0	0	0	0	0	0	0	0	0	0	0	0	0	0	0	0	0	0	0	0	0
AC009396.2	0	0	0	0	0	0	0	0	0	0	0	0	0	0	0	0	0	0	0	0	0	0	0	0	0	0	0	0
AC009396.3	0	0	0	0	0	0	0	0	0	0	0	0	0	0	0	0	0	0	0	0	0	0	0	0	0	0	0	0
AC009403.1	0.0975086	-0.279602	-0.28657	-0.303244	-0.333521	-0.354974	-0.150355	-0.321841	-0.000657517	-0.344842	-0.468541	-0.514138	-0.367968	-1.06619	-0.237051	0.142983	0.473723	-0.151815	0.443	-0.0497513	-0.259784	-0.649955	0.320841	0.0985108	-0.261841	-0.639071	-0.596716	-0.342516
AC009404.1	0.0882596	0.129504	-0.00373943	-0.248515	-0.313986	0.156176	0.00546571	-0.078692	-0.241819	-0.054153	-0.159134	-0.252886	-0.162358	-0.336225	0.20318	0.491122	0.53278	0.50449	0.121271	0.241095	0.313267	0.816622	0.54064	0.226187	0.392756	0.389124	0.744416	0.494118
AC009411.1	0	0	0	0	0	0	0	0	0	0	0	0	0.0584693	0.0946291	0	0	0	0	0	0	0	0	0	0	0	0	0	0
AC009411.2	0	0	0	0	0	0	0	0	0	0	0	0	0	0	0	0	0.142842	0	0	-0.0533927	-0.0533927	-0.0533927	-0.0533927	-0.0533927	-0.0533927	-0.0533927	-0.0533927	-0.0533927
AC009414.2	-0.226985	0.0681221	-0.0173026	0.199903	0.11213	0.72965	0.975908	1.0182	0.953643	0.979986	1.18225	1.46648	1.29941	1.12945	0.261508	0.46339	0.637521	0.64091	1.07737	-0.054349	0.184176	-0.193928	-0.0575692	-0.241289	-0.382054	0.0329964	-0.120859	-1.01883
AC009432.1	0.00021075	0	0	0	0	0	0	0	0	0	0	0	0.0652873	0	0	0.122784	0.108321	0	0.00197484	0.0638353	0	0	0.000492688	0	0	0	0.000608255	0
AC009435.1	0.0487251	-0.00328019	0.0544432	0.0515802	0.0485505	0.0340867	0	0	0.171725	0.0364074	0.155777	0.0568177	0.250763	0.662333	0.120644	0.00916595	0.00963535	0.284821	0.310853	0.212233	-0.00171863	0.000186651	0.0973681	0.139451	0.103301	0.0598053	0.215265	-0.00101274
AC009446.1	0	2.77476e-05	0	0.0306277	0	0	0	0	0	0.0249234	0.0336492	0.0288721	0	0	-0.13285	-0.129726	-0.131275	-0.132799	0.0277076	-0.0111068	-0.0493092	-0.00451342	-0.0492672	-0.0493092	-0.0493092	-0.0101693	-0.0490068	-0.0493003
AC009468.1	0	0	0	0	0	0	0	0	0	0	0	0	0	0	0	0	0	0	0	0	0	0	0	0	0	0	0	0
AC009468.2	0	0	0	0	0	0	0	0	0	0	0	0	0	0	0	0	0	0	0	0	0	0	0	0	0	0	0	0
AC009477.2	0	0	0	0	0	0	0.345934	0	0	0	0	0	0	0	-0.658804	-0.197263	-0.658804	-0.658804	-0.658804	0	0	0	0	0	0	0	0	0
AC009478.1	0	0	0	0	0	0	0	0	0	0	0	0	0	0	-0.000185426	-0.000185426	0.00241564	0.000169119	-0.000185426	0	0	0	0	0	0	0	0	0
AC009480.1	0	0	0	0	0	0	0	0	0	0	0	0	0	0	0	0	0	0	0.179911	0	0	0	0	0	0	0	0	0
AC009486.1	-0.0514617	-0.0514617	-0.0514617	-0.0514617	-0.0514617	-0.145581	-0.1174	-0.145581	-0.145581	-0.145581	-0.145581	-0.145581	-0.145581	-0.127827	0	0.0938472	0	0	0	-0.0489234	-0.0489234	-0.0489234	-0.0489234	-0.0489234	-0.0489234	-0.0147211	0.146965	-0.0489234
AC009487.1	0	0	0	0	0	0	0	0	0	0	0	0	0.0545781	0.0578921	0	0	0	0	0	0	0	0	0	0	0	0	0	0
AC009495.1	0.115459	0	0.103485	0	0	-0.0293635	-0.0985971	0.378184	0.146996	-0.0308631	0.25492	-0.00484376	0.220285	0.0939596	0	0	0.963665	0.214073	0	-0.231561	-0.231561	-0.231561	-0.231561	-0.121639	-0.231561	0.0774499	0.144956	-0.128383
AC009495.2	0.121877	0	0	0	0	0.40355	0.0513971	-0.0595532	0.207933	0.0598685	0.0626244	0.00928323	0.0616262	0.0212177	-0.115535	0.152582	0.59526	-0.124738	0.327671	-0.0133307	0.00793025	-0.00920913	0.354684	0.200347	0.14137	-0.0116045	-0.085106	0.297909
AC009495.3	0.00269595	0.0696722	0.00484992	-0.0278769	0.0357765	-0.0093049	-0.0314652	0.0348237	0.0307893	0.0201301	0.187549	0.102327	0.179887	0.067885	0.14356	0.0804312	0.0859599	0.085034	0.0883801	0	0	0	0.149528	0.0373035	0	0.0396455	0	0.0342817
AC009498.1	0	0	0	0	0	0	0	0	0.0442383	0	0	0.0621036	0.247441	1.08835	0	0	0	0	0.124986	0	0.12395	0	0	0.0611207	0	0.06471	0	0
AC009501.1	0.00489969	-0.0184854	-0.0080446	0.00127438	-0.0184854	0	0	0.0110845	0	0.00838067	0	0	0	0	0.0785442	-0.225721	-0.1658	-0.217581	0.0196563	0	0.0172411	0	0.0830692	0.01448	0	0	0	0
AC009502.1	-0.00142345	-0.108784	-0.129633	-0.110687	-0.120439	0.0679342	0.140827	0.0662299	-0.00151403	-0.010254	0.118333	0.0619328	0.0464081	1.87095	-0.347616	-0.333598	-0.571366	-0.360823	-0.742517	-0.00331038	-0.037108	0.202082	0.177223	-0.16644	-0.180484	0.0548682	-0.0802246	-0.181029
AC009505.1	0	0	0	0	0	0	0	0	0	0	0	0	0	0	0	0	0	0	0	0	0	0	0	0	0	0	0	0
AC009506.1	0.0275062	-0.140917	-0.0726746	0.217295	-0.0292603	-0.282913	-0.362818	-0.337288	-0.492111	-0.378137	-0.394515	-0.461395	-0.287335	-0.269296	-0.114792	-0.11073	-0.432636	-0.240733	-0.219622	-0.108165	0.0319923	0.343322	0.390535	0.348443	0.412399	0.244829	0.213586	0.217998
AC009509.1	-0.0801918	-0.014293	0.0715729	-0.0858027	-0.0669237	0.0141497	0	0	0.332971	0.0570934	0.0226561	0.252635	0.340969	0.157789	-0.157882	0.117902	-0.0916095	-0.142626	-0.256084	-0.0627886	-0.0627886	0.0451949	-0.0188687	0.214928	0.0970384	0.0501956	0.118118	-0.0627886
AC009509.2	0.0753414	0	0	0	0	0.0541842	0	0.0703868	0	0.0546362	0	0	0	0.0525324	-0.198859	-0.198859	0.369011	-0.198859	-0.013964	-0.11092	0.00520621	-0.11092	-0.11092	-0.11092	-0.11092	-0.11092	-0.0074791	-0.11092
AC009509.4	-0.0919429	-0.134847	-0.314379	-0.470394	-0.423115	0.175061	0.431775	0.150502	0.251864	0.0418492	0.23402	0.012841	0.406064	-0.245684	-0.631248	0.0297393	-0.259785	0.706383	-0.166876	0.248662	-0.048104	-0.142202	0.326857	0.509155	0.154967	-0.173075	-0.225491	-0.0149621
AC009511.1	0.357041	0	0	0	0	0	0	0	0	0	0	0	0	0	0	0	0	0	0	0	0	0	0	0	0	0	0	0
AC009511.2	0	0.0792154	0	0	0	-0.0752138	-0.0380259	0.00680639	0.00143678	-0.0752138	-0.0752138	-0.0386474	-0.0752138	-0.0752138	0.000650543	-0.00197194	-0.000520863	4.6e-05	0.09324	0.110878	0	0	0.0449445	0.051631	0	0.0473491	0.063231	0
AC009518.1	-0.000157102	1.86247e-05	0.0195619	0.000630827	-0.000775734	-0.0176301	-0.0176301	-0.0176301	-0.0176301	-0.0176301	-0.00131703	-0.0176301	1.16852	-0.0176301	-0.0560993	-0.0564421	-0.0445417	-0.0528197	-0.0589529	0.01912	-0.0013844	-0.00109612	0.0440799	0.0201608	-0.00300285	-0.00111859	0.0089911	0.0186481
AC009531.1	0	0	0	0	0	0	0	0	0	0	0	0	0	0	0	0	0	0	0	0	0	0	0	0	0	0	0	0
AC009542.1	0	0	0	0.0408547	0	0	0	0	0	0	0	0	0	0	-0.385039	-0.518342	-0.621148	-0.241377	-0.415108	0	0	0.0529785	0	0	0	0	0	0
AC009549.1	0.476821	0.243206	0.0813726	-0.129777	-0.146586	-0.0817205	-0.0646942	-0.213103	-0.250493	-0.242531	-0.267516	-0.552378	-0.679108	-0.138573	-0.693932	-0.111677	-0.155673	0.327678	-0.118502	0.417424	0.731604	0.858806	0.84774	0.936916	0.991196	1.38804	1.15396	1.10235
AC009554.1	0	0	0	0	0	0	0	0	0	0	0	0	0	0	0.153294	-0.000453855	0.000354429	-0.000453855	0.00420307	0	0	0	0	0	0	0	0	0
AC009558.1	0	0	0.049568	0	0	0	0	0.0509411	0	0	0	0.0558049	0.0388527	0.0272525	0	0.106052	0	0	0	-0.0768436	-0.0768436	0.0244848	-0.0768436	-0.0768436	-0.0768436	-0.0768436	-0.0768436	-0.0768436
AC009560.1	0.00740425	0.0903341	0.0127692	-0.0664594	-0.0664594	-0.0840387	0.119039	0.206119	0.134954	-0.0840387	-0.0840387	0.106871	0.220905	0.342327	0.167649	0	0	0.173167	0.349157	0.0272394	-0.147851	-0.147851	-0.0619934	-0.147851	-0.147851	-0.147851	0.161162	0.0987089
AC009562.1	0.0523723	0	0	0	0	0	0	0	0	0	0	0	0	0	0	0	0	0	0	0	0	0	0	0	0	0	0	0
AC009563.1	0	0	0	0	0	0	0	0	0	0	0.0430132	0	0.0318761	0	0.0974816	0	0	0.104137	0.110933	0	0	0	0.0754095	0	0	0	0	0
AC009567.1	0	0	0	0	0	0	0	0	0	0	0	0	0	0	0	0	0	0	0	0	0	0	0	0	0	0	0	0
AC009570.1	-0.142761	-0.251542	-0.22335	-0.194584	-0.279029	0.35325	0.189409	0.237797	0.153076	0.232901	0.282156	0.154968	0.471617	0.479429	-0.142438	0.251531	0.107707	0.0641626	0.138275	-0.0930974	0.0156547	0.325642	-0.0171289	0.224551	-0.093254	0.0533012	0.235008	-0.118772
AC009597.1	0	0	0	0	0	0	0	0	0	0	0	0	0	0	0	0	0	0	0	0	0	0	0	0	0	0	0	0
AC009623.1	0	0	0	0	0	0	0	0	0	0	0	0	0	0	0	0	0	0	0	0	0	0	0	0	0	0	0	0
AC009623.2	0	0	0	0.070267	0	0	0	0	0	0	0	0	0	0	0	0	0	0	0	0	0	0	0	0	0	0	0	0
AC009630.1	-0.0889312	-0.232255	-0.0911188	-0.196114	-0.109894	0.296357	0.21428	-0.10556	0.2288	0.145852	0.220098	0.33465	0.265607	0.193378	0.514716	0.514989	0.123558	0.070865	0.704335	-0.0242598	-0.0350874	0.0138706	0.089529	0.223131	-0.129429	0.588297	0.998262	0.247178
AC009630.2	-0.0194254	-0.0927889	-0.0378751	0.0191897	0.0422385	-0.172737	-0.126583	-0.172737	-0.0339642	-0.172737	-0.172737	-0.147052	-0.172737	-0.152436	-0.749625	-0.632298	-0.371096	-0.747967	-0.628415	-0.0354507	0.156764	-0.113423	-0.153354	-0.119454	-0.119969	-0.22154	-0.321238	-0.256642
AC009630.3	-0.20534	-0.20534	-0.20534	-0.20534	-0.133712	-0.00184912	0.0587656	-0.0676627	0.0661768	-0.0676627	-0.0676627	0.103524	-0.0676627	-0.050149	0.000272741	0.00148524	0.00215205	0.00305641	0.101127	-0.177343	-0.191264	-0.229539	-0.147353	-0.140278	-0.0975719	-0.148671	-0.275733	-0.189168
AC009646.2	0	0	0	0	0	0	0	0	0	0	0	0	0	0	0.10015	0.0698199	1.65e-05	8.58e-05	0	1.59e-05	2.03e-07	3.29e-05	1.26e-05	0.000157059	0	1.33e-05	0	0
AC009652.1	0	0	0	0	0	0	0	0	0	0	0	0	0	0	0	0	0	0	0	0.0608661	0	0	0.107729	0	0	0.0808679	0	0
AC009652.2	0	0	0	0	0	0	0	0	0	0	0	0	0	0	-0.116845	-0.116845	-0.116845	-0.116845	-0.116845	0	0	0	0.0793278	0.0655172	0	0	0	0
AC009654.1	0	0	0	0.0333268	0	-0.0322851	-0.0322851	-0.0322851	-0.0322851	-0.0322851	-0.0322851	-0.0322851	-0.00451948	-0.0322851	0	0.186111	0.094917	0	0.082598	0	0	0	0	0	0	0	0	0
AC009656.1	0	0	0	0	0	0	0	0	0	0	0	0	0	0	0	0	0	0	0	0	0	0	0	0	0	0	0	0
AC009686.1	0	0	0	0	0	0	0	0	0	0	0	0	0	0	0	0	0	0	0	0	0	0	0	0	0	0	0	0
AC009686.2	-0.0420812	-0.0420812	0.00799188	-0.0420812	-0.0420812	0.0624114	0	0.103415	0	0	0.154713	0.0462676	0	0.0237421	-0.333851	-0.226893	-0.111906	-0.215864	-0.219022	0	0	0.0629952	0	0.0641741	0	0.21401	0.216527	0.0621732
AC009690.1	0.0563372	0.0690269	0.00712004	0.103834	0.0430213	0.0557455	0.0414739	0.107415	0.00564216	0.0308086	0.0249013	0.112313	0.0135397	0.0952862	0.0352208	-0.000335424	0.0225366	0.0127154	0.0920356	0.00810166	-0.0028007	0.0148378	0.0254392	0.0053079	0.104202	0.147486	0.506631	0.150251
AC009690.2	-0.16096	-0.140907	-0.174655	-0.073721	-0.0288424	-0.834176	-0.179426	-0.357434	0.179108	-0.958424	-0.963953	0.437079	-0.948224	-0.951631	0.0420871	-0.176782	0.0547101	-0.12047	-0.0706023	-0.0582268	-0.0461558	-0.049008	-0.0200637	-0.0238492	0.0213379	0.0872844	0.172866	0.0748891
AC009690.3	0.015526	0.0331448	0.0223783	0.0170659	-0.00462161	-0.0158728	-0.00250848	-0.00155759	-0.00328795	-0.00476741	0.010548	0.0119841	-0.00467648	-0.00239115	0.0142586	0.00678418	0.00613697	0.00996894	0.0418891	-0.00238189	-0.00694736	-0.00338424	0.00611314	-0.00400583	0.00737879	0.0149417	0.063961	0.0397459
AC009704.1	0	0	0	0	0	-0.134716	-0.134716	-0.134716	-0.134716	-0.134716	-0.134716	-0.134716	-0.134716	0.0883757	0	0	0	0	0	0	0	0	0	0	0	0	0	0
AC009716.1	0	0	0	0	0	0	0	0	0	0	0	0	0	0	-0.884585	-1.39037	-1.17651	-0.352156	-1.06636	0	0	0	0	0	0	0	0	0
AC009720.1	-0.0311862	-0.0839271	-0.101746	-0.0105407	-0.0438264	0.0638113	0.0157518	0.0573494	-0.0332994	0.0890838	0.0807861	0.0696571	0.158879	0.145441	-0.0234328	0.00720529	0.0992015	0.245066	0.158544	0.0729905	0.0949466	0.0635852	0.0721459	0.139739	0.111116	0.0531891	0.203128	0.158003
AC009720.2	0	0	0	0	0	0	0	0	0	0	0	0	0	0	0.123101	0.138877	0	0	0.112925	0	0	0	0	0	0	0.0577979	0	0
AC009743.1	0	0	0	0	0	0	0	0	0	0	0	0	0	0	0	0	0	0	0	0	0	0	0	0	0	0	0	0
AC009779.2	0.219159	0.196263	0.1592	0.186504	-0.143492	-0.019775	0.229069	0.257849	0.185762	0.374564	0.358699	0.447231	0.780087	0.809455	0.833218	0.697097	0.929549	0.63873	0.710661	0.271251	0.362453	0.393046	0.373582	0.350257	0.395812	0.331932	0.623598	0.611594
AC009779.3	-0.147617	-0.0883578	0.158306	0.0225706	-0.299492	-0.0869326	0.107465	-0.230661	-0.302825	0.228901	0.0851601	-0.440829	0.212354	0.0557572	0.124793	0.411368	0.113794	0.540581	0.314381	0.302562	0.317495	0.262498	0.231898	0.378849	-0.0986081	-0.213769	-0.340987	-0.117031
AC009779.5	-1.49077e-06	2.51024e-05	-1.34651e-05	0.000100575	-1.34651e-05	0	0	0	0	0	0	0	0.0411468	0.0299627	-0.0354072	-0.041901	0.125733	0.106322	-0.0385133	-5e-05	-1.48e-07	-6.82e-05	9.12e-06	-6.82e-05	0.133101	-5.59e-05	-4.61e-05	-5.45e-05
AC009802.1	0.0818889	-0.0161493	-0.0297345	0.00296196	0.015601	-0.0227637	0.0082477	-0.0110912	-0.0398496	-0.0375206	-0.0657038	0.0216698	-0.0312273	0.00550462	0.0383183	0.0358541	0.151558	0.110986	0.0350129	0.064347	0.0279602	0.0197071	0.0287213	0.0332963	0.134579	0.0660126	0.000294975	-0.0178838
AC009803.1	0.0928006	0	0.0895701	0	0.0817506	-0.0789274	-0.0789274	0.0774157	-0.0789274	-0.0240277	0.111572	-0.0789274	-0.0291735	-0.0368493	0.191225	-0.091089	0.0424107	-0.161028	0.162003	-0.037438	-0.157184	-0.0472993	-0.0220249	0.0332857	-0.157184	0.00113327	-0.157184	-0.0177707
AC009803.2	0	0	0	0	0	0	0	0	0	0	0	0	0	0	0	0	0	0	0	0	0	0	0	0	0	0	0	0
AC009803.3	0.111821	-0.0382065	0.0285762	0.194837	-0.11562	0.0941464	0.106948	0.492045	0.298976	0.149075	0.161247	0.242951	-0.0798743	-0.115621	0.069987	-0.106962	-0.0108321	-0.551408	-0.45667	0.184381	-0.220791	0.188434	0.379	0.157851	0.505498	0.39638	-0.0131154	0.00160512
AC009804.2	0	0	0	0	0	0	0	0	0	0	0	0	0	0	0	0	0	0	0	0	0	0	0	0	0	0	0.011523	0
AC009806.1	-0.163345	0.0167761	0.255474	0.203711	0.00159999	-0.0146187	0.0934234	0.010711	0.375502	0.252596	0.353856	0.422763	0.531779	0.767704	-0.14166	0.264562	0.150935	0.610201	-0.127634	0.291494	0.0746571	0.474201	0.636448	0.372547	0.136906	0.153242	-0.140904	-0.0318608
AC009812.1	0.0287401	-0.127356	-0.13607	-0.0471708	-0.187696	-0.0803295	-0.14396	-0.275246	-0.273278	-0.188145	-0.194761	-0.20232	-0.288765	-0.285836	-0.280455	-0.451992	-0.439651	-0.432459	0.036267	0.210645	0.0436875	0.0276739	0.200841	0.128883	0.423567	0.446061	0.916258	0.444139
AC009812.3	0.0436402	0.0109006	0.0062644	0.014681	0.0049425	0.0171265	-0.0027192	-0.0168247	-0.0119475	-0.00954554	-0.00770855	-0.00653427	-0.0225949	-0.00612259	-0.0314093	-0.0360658	-0.00172429	-0.0168359	-0.0506701	0.0254773	0.0224028	0.0151251	0.0281769	0.0312269	0.0158984	0.0274206	0.0255592	0.0200746
AC009812.4	0.135043	0.0880292	-0.0358387	-0.000169182	0.0049022	-0.00311002	-0.051695	-0.0247378	-0.102599	-0.0822664	-0.100297	-0.07511	-0.0854676	-0.142626	-0.124969	-0.017417	-0.0247947	-0.183115	0.00946124	-0.185091	-0.127877	-0.030426	-0.0987772	-0.043349	-0.097846	0.0656967	0.174497	-0.0599212
AC009831.1	0.0131184	0.0371962	-0.0703611	0.0716952	-0.0401116	0.219215	0.240874	0.281895	0.271222	0.172692	0.170095	0.28724	0.640779	0.341282	0.0475598	-0.238844	0.300329	-0.0704868	0.289054	0.183009	0.108523	0.172232	0.222028	0.0809417	0.387412	0.138987	0.71346	0.222236
AC009852.1	0	0	0	0	0	0	0	0	0	0	0	0	0	0	0	0	0	0	0	0	0	0	0	0	0	0	0	0
AC009869.1	0	0	0	0	0	0	0	0	0	0	0	0	0	0	0	0	0	0	0	0	0	0	0	0	0	0	0	0
AC009884.1	0	0	0	0	0	0.0368694	0	0	0	0	0	0	0	0	0	0.152047	0	0	0	0	0	0	0	0	0	0	0	0
AC009902.2	0.130275	-0.0054655	-0.184848	-0.166576	-0.000406603	-0.165791	-0.0999638	0.0518479	0.122904	-0.145485	-0.0820152	-0.241423	-0.454822	-0.282197	-0.00173924	-0.0656921	-0.363089	-0.274074	-0.375728	0.361357	0.116592	0.0212996	0.494708	0.247778	0.235295	0.0628855	-0.192145	0.22616
AC009902.3	0.0716592	0.0715893	0.0529246	0.0247364	-0.0494922	0.00207704	0.0410078	-0.000385084	-0.0126513	-0.00963544	0.02039	-0.0294609	0.00630532	0.0765132	-0.0404008	0.0219504	-0.0142332	-0.0153441	0.011568	-0.0182464	0.022019	-0.0422336	0.00560103	0.0348018	0.0151778	0.0280397	0.0191808	0.00299049
AC009908.1	0.087442	0	0	0	0.170184	0.0580291	0	0	0	0	0.163355	0.0957803	0.111549	3.42534	0	0	0	0	0.310537	0	0	0	0	0	0	0	0	0
AC009930.1	0	0	0	0	0	0	0	0	0	0	0	0	0	0	0	0	0	0	0	0	0	0	0	0	0	0	0	0
AC009948.1	0.199776	-0.244183	-0.24133	-0.677047	-0.462974	-0.576346	-0.566325	-0.585081	-0.951152	-1.06684	-0.80049	-1.42318	-1.3471	-1.61871	-0.673442	-1.05274	-1.06615	-0.787615	-0.922966	0.372987	0.393631	0.253175	0.127557	0.0358679	-0.161086	-0.358024	-0.410397	-0.209139
AC009948.3	-0.000829794	-0.0787433	-0.00917991	-0.249664	-0.276166	-0.0356254	0.0319836	-0.0282306	-0.114086	0.10738	0.0965279	-0.084036	-0.255471	-0.37344	0.0416494	-0.0655031	-0.0505861	0.0882832	0.0938746	0.153536	0.174742	0.102864	0.0695381	0.0773301	0.0576848	0.135818	0.134017	-0.114664
AC009948.4	-0.34537	-0.360428	-0.315588	-0.286868	-0.270129	0.0302006	0.00809301	0.0336815	-0.386398	0.546621	0.584716	-0.360162	-0.0952886	-0.182505	-0.51615	-0.513694	-0.64693	-0.432633	-0.302859	-0.100325	-0.159261	0.375309	0.306283	0.0548199	-0.0431939	0.453821	-0.0625481	-0.120437
AC009950.1	0.165513	0.0495835	0.104197	-0.119593	-0.0363866	0.142974	0.132281	0.179531	0.117498	0.116475	0.128223	-0.00402976	0.311502	0.410536	-0.212455	-0.62599	-0.0241804	-0.085928	-0.0587235	0.0506697	-0.109047	0.123534	0.0344174	0.163385	0.159548	-0.139186	0.0224686	-0.157815
AC009951.2	0	0	0	0	0	0	0	0	0	0	0	0	0	0	0	0	0.114216	0	0	0	0	0	0	0	0	0	0	0
AC009955.1	0.204554	0	0	0	0	0.410657	0	0	0	0	0	0	0	0	0	0	0	0	0	0.194478	0	0	0	0	0	0	0	0
AC009955.2	0.121614	0.165041	0.172023	0.111136	0.0552607	0	0.0497659	0.49654	0.266075	0.0393136	0.322759	0	0.0782195	0.0377319	0	0	0	0	0.124454	0	0	0	0.164409	0.0609572	0.41117	0.0665342	0.230896	0.127647
AC009955.3	-0.062998	0.0198031	0.0175628	0.0860128	-0.062998	0.0915886	0	0.0655823	0	0.0540479	0.378984	0.386877	0.0555465	0.516002	0.168504	0.00934043	0.1676	-0.0204638	0.131989	-0.180673	-0.180673	-0.180673	-0.180673	-0.0880017	-0.180673	-0.0160271	0.0290797	-0.180673
AC009955.4	-0.0460438	-0.0460438	0.00874081	-0.0460438	-0.0460438	-0.0520653	-0.00226045	-0.0520653	0.0514621	-0.0520653	-0.0520653	-0.0520653	-0.0123325	-0.0222746	-0.0364319	-0.15523	-0.155685	-0.0299189	-0.0319603	-0.156637	-0.156637	-0.156637	-0.156637	-0.156637	-0.156637	-0.156637	-0.156637	0.0139104
AC009961.1	0.0144303	0.186897	-0.283145	-0.715713	-0.643676	-0.239584	0.280009	0.167579	0.157745	-0.167184	0.144825	-0.103041	-0.457619	-0.58164	-0.505515	-0.485733	-0.696622	-1.12711	-0.0719956	-0.274462	0.284137	0.238192	0.0609016	-0.491955	-0.747962	0.0770958	0.314355	-0.60302
AC009962.1	0.00672196	0.0029191	-0.0151611	-0.0236835	-0.0272717	-0.0284635	-0.0663007	-0.0700498	-0.0784344	-0.0945237	-0.100763	-0.132352	-0.127574	-0.115121	-0.127812	-0.0865563	-0.0977932	-0.063322	-0.162814	0.0538179	0.127355	-0.00986338	-0.0134543	-0.0194543	-0.0237905	-0.0648927	-0.083561	-0.0914222
AC009965.1	-0.0435082	-0.0435082	0.00750694	0.0129523	0.0553645	0	0	0	0.0408914	0.0399801	0	0.0574123	0	0	-9.38e-05	-9.38e-05	0.125478	-9.38e-05	0.120361	-0.0790159	-0.0790159	-0.0790159	-0.0219858	-0.0790159	-0.0790159	-0.017049	-0.0790159	-0.0790159
AC009970.1	0	0	0	0	0	0	0	0	0	0	0	0	0	0	0	0	0	0	0	0	0	0	0	0	0	0	0	0
AC009971.1	0.0434727	0.00887078	-0.0306205	-0.0730936	-0.0337033	0.12335	0.493653	0.463425	0	0.0322537	0	0.541782	0.0589537	0.0702694	0.167091	0.255162	0.213866	-0.00741916	0.335997	-0.0654774	-0.033443	0.247203	-0.103272	-0.158354	0.0383292	-0.114688	-0.158354	0.0287499
AC009974.1	0.0420566	-0.137408	0.245478	0.0415232	-0.215561	-0.135489	-0.268325	-0.401543	-0.17502	-0.209952	-0.200923	-0.401543	-0.305109	-0.250787	0	0	0	0	0.156787	0.0842984	0	0.329336	0.217192	0	0.478668	0.439664	0.449028	0.803994
AC009975.1	0	0	0	0	0	0.0051741	0	0.00795179	0	0	0	0.0947961	0	0.00861276	0.00415813	-0.0166929	-0.0166929	-0.0166929	-0.0166929	0	0	0	0	0	0	0.00873075	0	0
AC009975.2	4.56585e-05	-0.000370366	6.9695e-05	0.0169343	-0.000631902	0	0	0	0	0	0	0	0	0.0144044	0.0396156	0.0158412	0.00468035	0.084042	-0.000116005	0.00215831	0.00340077	0.00175823	0.000439296	0.000833068	0.027017	0.00292616	0.0215703	0.0008501
AC009987.1	0	0	0	0	0	0	0	0	0	0	0	0	0	0	0	0	0	0	0	0	0	0	0	0	0	0	0	0
AC009988.1	0	0	0	0	0	0	0	0	0	0	0	0	0	0	0	0	0	0	0	0	0	0	0	0	0	0	0	0
AC010082.1	0	0	0	0.0540362	0	0	0	0	0	0	0	0	0	0	0	0	0	0	0	0	0	0	0	0	0	0	0	0
AC010096.1	1.22629e-05	0	0	0	0	-0.0132853	-0.0132853	-0.0132853	-0.0132853	-0.0132853	-0.0132853	-0.0132853	0.0187441	-0.0132853	0.0696109	2.31e-05	0.0357535	-7.72e-05	0.0370732	-3.55e-05	-4.23e-05	2.02e-06	-2.44e-05	-2.87e-06	1.64e-05	-2.29e-05	-4.23e-05	-1.54e-05
AC010099.4	0	0	0	0	0	0	0	0	0	0	0	0.0172295	0	0	0	0	0	0	0	0	0	0	0	0	0	0	0	0
AC010105.1	0	0	0	0	0	0	0	0	0	0	0	0	0	0	0	0	0	0	0	0	0	0	0	0	0	0	0	0
AC010127.1	0.124568	0.11188	-0.0407931	-0.00706804	0.0167724	-0.206767	-0.244978	-0.259143	-0.219201	-0.277828	-0.288377	-0.228731	-0.265524	-0.280692	-0.0128947	-0.566422	-0.0672731	-0.463025	-0.193471	-0.111331	-0.0908179	-0.192163	-0.162217	0.0251661	-0.277777	0.0123677	-0.105803	-0.102232
AC010132.1	0	0	0	0	0	0	0.0475456	0	0	0	0	0.120608	0	0	0	0	0	0	0	0	0	0	0	0	0	0	0	0
AC010132.3	0.106335	0.247708	0.257404	-0.0610008	-0.371034	0.16208	0.40414	0.422213	0.266676	0.390664	0.331913	0.559708	0.532558	0.442892	0.305161	0.575056	0.488749	0.411598	0.54043	-0.148017	0.0357838	0.0120227	0.0478693	0.0209612	-0.126111	-0.00147169	0.160784	0.244849
AC010132.4	0.129705	0.0818268	0.0436199	-0.000656474	-0.0799137	0.114058	0.0679114	0.0682236	0.054172	0.0107785	0.0713769	0.125208	0.353101	0.271752	-0.0333684	0.106156	0.107261	0.209262	0.131042	-0.0447697	0.0219895	0.126736	0.102061	0.00496469	0.00899952	0.0781482	0.177687	0.250771
AC010136.1	-0.0519946	-0.0519946	-0.0519946	-0.0519946	-0.0517324	-0.0545285	-0.00813237	-0.0545285	-0.0545285	-0.0545285	-0.00315478	-0.0545285	-0.0545285	1.5245	-0.000727541	0.116948	0.247192	-0.000727541	-0.000727541	-0.191947	-0.191947	-0.0875283	-0.127849	-0.191587	-0.191947	-0.191855	-0.123767	-0.191947
AC010139.1	0	0	0	0	0	0	0	0	0	0	0	0	0	0	0	0	0	0	0	0	0	0	0	0	0	0	0	0
AC010145.1	-0.0601729	-0.0601729	0.0564505	-0.0601729	-0.0601729	0	0	0	0	0	0	0	0.0455611	0	0	0	0.142497	0	0	0	0	0	0	0	0	0	0	0
AC010149.1	-0.125844	-0.0740994	-0.0749709	-0.0695338	0.0573507	0	0.257295	0.212047	0	0	0.292127	0	0.0420663	0.06307	0.581617	0.19765	0.0795349	0.569967	0.0492107	0.0413328	0	0.0639132	0	0	0	0	0	0.063107
AC010157.1	0	0	0	0	0	0	0	0	0	0	0	0	0	0.0392055	0	0	0	0	0	0	0	0	0	0	0	0	0	0
AC010163.1	0.009924	-0.0498299	0.361202	-0.0519792	0.11526	-0.01623	-0.0558767	0.316027	0.297766	0.0295645	0.0411249	0.457489	0.256515	0.530068	-0.273167	-0.273167	-0.132077	-0.273167	-0.128967	0.202381	0	0	0.100276	0	0	0.191119	0	0
AC010163.2	-0.178072	0.0174099	0.190133	-0.178072	0.0133048	0	0	0.100065	1.25717	0.204881	0	1.08241	0.1962	0.156503	0	0	0	0	0	0	0	0.212365	0	0	0	0.102283	0	0.210865
AC010168.1	-0.0437556	-0.0437412	0.000222536	-0.0437556	0.0343557	0.103492	0	0.036807	0.0332924	0	0	0.213507	0.0331394	0.0199999	0.207905	0.288835	0.190275	0	0.163728	0.0340379	0.000299955	-3.31e-05	-3.31e-05	-3.31e-05	0.089028	0.0510421	0.000456173	-3.31e-05
AC010173.1	-0.0768473	-0.120931	-0.0892589	0.148715	0.00565494	-0.0512999	-0.0046526	0.0575939	0.0663808	0.210151	0.18548	0.133325	0.255225	-0.0226009	-0.168249	-0.303868	-0.0471429	-0.00961479	0.00471532	-0.107292	0.129116	-0.0224682	0.0578819	-0.0718707	-0.229012	-0.327405	-0.346815	-0.539656
AC010175.1	0	0	0	0	0	0	0	0	0	0	0	0	0	0	0	0	0	0	0	0	0	0	0	0	0	0	0	0
AC010177.1	0	0	0	0	0	0	0	0	0	0	0	0	0	0	0	0	0	0	0	0	0	0	0	0	0	0	0	0
AC010181.1	0	0	0	0	0	0	0	0	0	0	0	0	0	0	0	0	0	0	0	0	0	0	0	0	0	0	0	0
AC010181.2	0	0	0	0	0	0	0	0	0	0	0	0	0	0	0	0	0	0	0	0	0	0	0	0	0	0	0	0
AC010183.1	0	0	0	0	0	0	0	0	0	0	0	0	0	0	0	0	0	0	0	0	0	0	0	0	0	0	0	0
AC010183.2	0	0	0	0	0	0	0	0	0	0	0	0	0	0	0	0	0	0	0	0	0	0	0	0	0	0	0	0
AC010185.1	-0.0621208	-0.0621208	-0.0621208	0.0105114	0.00957553	-0.135172	-0.0117347	-0.135172	-0.00156144	-0.135172	-0.135172	-0.135172	-0.135172	-0.135172	-1.66e-05	-6.83e-05	0.323952	0.00113669	-0.00045975	-0.120031	0.0616374	-0.115344	-0.0292832	-0.204042	0.0814977	-0.0450854	-0.204042	-0.0466921
AC010186.1	-0.103186	0.0774469	0.0606973	-0.103186	-0.103186	-0.0539045	-0.0539045	-0.0539045	-0.0539045	-0.0539045	-0.0539045	-0.0539045	-0.0173922	0.0033441	-0.0212035	-0.145395	-0.145395	-0.145395	-0.0176869	0	0.0846167	0.0779087	0	0.0718809	0	0	0	0
AC010196.1	0	0	0	0	0	0	0	0	0	0	0	0	0	0	0	0	0	0.18371	0	0	0	0	0	0	0	0	0	0
AC010197.1	0.0508926	0.00124177	0	0	0	0	0.554639	0.458193	0.418938	0.0380374	0	0	0.0717781	0.0274422	-0.140057	-0.146769	-0.146769	-0.146769	-0.146769	-0.0698923	0.0828758	-0.0698923	-0.0537383	-0.0177407	-0.0698923	-0.0658731	-0.0698923	-0.0698923
AC010198.1	0.0306547	0.00357227	0.0304309	0.039822	-0.0119519	0.0147566	0.0250108	0.013967	-0.0133201	-0.0011482	0.0112654	-0.000284934	-0.00200597	0.043652	-0.0785811	-0.0489311	0.00215263	-0.0763512	-0.0385775	-0.0204463	-0.0204463	-0.0204463	0.0228755	0.0192721	-0.0204463	-0.00288364	-0.0204463	-0.00293413
AC010201.1	0.425291	0.0315371	0.198045	0.115185	0.14563	0.373357	0.543029	0.105766	0.27543	0.614562	0.375676	0.189878	0.143054	0.244112	0.016399	0.113007	-0.107627	-0.112357	-0.117023	0.0169531	0.00655585	0.328156	0.454666	0.174296	0.368864	0.306455	0.815519	0.29498
AC010201.2	0.263521	0.202791	0.177392	0.154639	0.049579	-0.135276	-0.0160312	-0.00220209	-0.24536	-0.0691161	-0.0639651	0.0494347	-0.135189	-0.174588	-0.193081	-0.308206	-0.0982163	-0.0984883	-0.222452	0.0787507	0.18124	0.251633	0.354759	0.289516	0.35425	0.434594	0.759126	0.38862
AC010203.2	0.0853127	0	0.0845133	0	0.0854523	0	0	0.0734633	0.232001	0.222127	0.0826588	0.498776	0.061446	0.159742	0.368539	0.30269	0.188	0.000181729	0	0	0	0	3.92e-05	0	0	0	0	0.0852942
AC010205.1	0.149593	0.217002	0.0747826	0	0.14356	-0.0899152	-0.140131	-0.140131	-0.00341072	-0.0334446	-0.140131	-0.0716601	-0.0881707	-0.140131	-0.185738	0.168383	-0.00370344	0.143066	-0.0261387	0.115965	0.00547043	-0.0119838	-0.102827	-0.102827	0.0475058	-0.0147095	-0.00661615	-0.102827
AC010207.1	0.130466	0.0829547	0.0921923	0.0466946	0.00572923	-0.0507283	-0.045205	-0.0959394	-0.0684244	-0.0607336	-0.0777808	-0.0385002	-0.0846199	-0.0884176	-0.374112	-0.355521	-0.336703	-0.3425	-0.430138	0.0307291	0.040089	-0.0503913	-0.0512851	-0.0794811	-0.0999792	-0.0965892	-0.0281115	-0.157056
AC010223.1	0	0	0	0	0	0	0	0	0	0	0	0	0	0	0	0	0	0	0	0	0	0	0	0	0	0	0	0
AC010226.1	0.197365	0.272635	-0.00788203	0.414782	0.177021	-0.255084	-0.110256	-0.170848	-0.0316209	-0.0799038	-0.087612	-0.326353	-0.095181	-0.324336	-0.581503	-0.0446177	-0.0750302	0.245854	-0.0637014	0.044308	-0.00669621	-0.103445	0.112172	0.344222	-0.102066	0.15333	0.168517	0.119625
AC010230.1	0	0	0	0	0	0	0	0	0	0	0	0	0	0	0	0.348237	0	0	0	0	0	0	0	0	0	0	0	0
AC010235.1	-0.0463455	-0.0463455	-0.0463455	-0.0463455	0.109557	0	0	0	0	0	0	0	0	0	-0.107703	0.043644	-0.107703	-0.107703	-0.107703	0	0	0	0	0	0	0	0	0
AC010240.3	-0.168645	0.10171	0.025231	0.175449	-0.168645	-0.0362831	-0.0165276	-0.0179381	0.0627689	-0.0335937	0.0682757	0.0887371	-0.0318142	0.00822522	0.352483	0.490359	0.216059	0.529912	1.05922	0.178673	0.23545	0.286777	0.11967	0.232369	0.143661	0.096543	0	0.105327
AC010245.1	0	0	0	0.0377734	0.0322099	0	0.0311335	0	0.0275587	0.0271188	0	0.0316631	0	0	0.0787967	-0.00131757	0.082659	-0.00155894	-0.000604593	0.099978	0	0.0847748	0	0.108356	0.113123	0.105091	0.0465566	0
AC010245.2	0.167267	-0.000769414	0.139141	0.0168976	-0.132305	-0.187305	-0.115163	-0.0101576	-0.285759	-0.152397	-0.180955	0.0812868	-0.198665	-0.184396	-0.00413276	-0.0327476	-0.0129173	-0.161868	-0.0287806	0.0399327	-0.134211	0.0122402	0.00728024	0.178702	0.163181	0.187774	0.0614843	-0.0856448
AC010247.2	0.00329263	0.0473399	-0.0068462	0.00336049	-0.00786165	-0.0176696	-0.00320441	-0.0306095	-0.0162714	0.000852497	0.0250063	-0.0234097	0.0825534	0.0497977	-0.0263733	-0.0574572	0.0703718	-0.0277922	0.0317168	0.0215493	0.0701361	0.0457747	0.0512828	0.0452982	0.0612621	0.115992	0.319027	0.0932962
AC010255.1	0.0518458	0.0764205	-0.0570428	-0.0379681	-0.122268	0.154512	0.138698	0.12242	0.233188	0.113988	0.11796	0.32813	0.722914	1.10541	-0.16368	-0.0112401	0.304809	0.207503	0.823402	0.273687	0.0489845	-0.0743558	-0.151406	0.00891414	0.0513727	-0.20295	-0.025557	-0.137318
AC010255.2	0.0819454	0.000527348	0	0	0.00145833	-0.0860379	-0.0860379	-0.0860379	-0.0860379	-0.0282825	-0.0860379	-0.0860379	-0.0363345	-0.0860379	-0.00375206	-0.00375206	-0.00375206	0.301534	-0.00375206	0	0	0	0.00281418	0	0.00061749	0	0	0
AC010255.3	-0.0105831	0.0145375	-0.0105831	-0.0105831	0.00160455	0.0105677	-0.0131285	5.72e-05	-0.0131285	0.0119564	-0.0131285	0.696265	0.0253	0.00831767	-0.114883	-0.0525286	-0.0528655	-0.0810109	-0.0509439	0.022534	-0.0175765	-0.00794993	-0.0199501	-0.00920184	-0.0380118	-0.0380118	0.118724	-0.0380118
AC010260.1	0	0	0	0	0	0	0	0	0	0	0	0	0	0	-0.117709	0.00386017	0.0967197	0.092818	0.0936962	0	0	0	0	0	0	0	0	0
AC010261.1	0	0	0	0	0	0	0	0	0	0	0	0	0	0	0	0	0	0.0109061	0	0	0	0	0	0	0	0	0	0
AC010261.2	-1.5581e-05	-2.16403e-05	0.0638259	0.0706324	0.0603006	-0.658174	-0.204224	-0.658174	-0.607238	-0.611111	-0.658174	-0.658174	-0.609792	-0.58585	-0.238774	0.167321	-0.238774	-0.238774	-0.0848535	0.0972585	0	0	6.85e-05	2.15e-05	1.69e-06	0.0761628	0	0.0781773
AC010266.1	0	0	0	0	0	0	0	0	0	0	0	0	0	0	0	0	0	0	0	0	0	0	0	0	0	0	0	0
AC010266.2	0	0	0	0	0	0	0	0	0	0	0	0	0	0.00380227	0.0353427	0	0	0	0	0	0	0	0	0	0	0	0	0
AC010267.1	0	0	0	0	0	0	0	0	0	0	0	0	0	0	0	0	0	0	0	0	0	0	0	0	0	0	0	0
AC010271.1	-0.0454366	-0.104624	-0.104624	-0.00489549	-0.0511501	0.0355697	0	0	0	0.0411274	0.108834	0.205243	0.0383963	0.0362774	-0.188706	-0.33205	0.278496	0.0733159	0.0981572	0.0707262	0.00755652	0.106217	0.0762255	-0.00632835	-0.0735442	0.0466551	-0.0735442	0.0535166
AC010271.2	-0.119967	-0.119967	0.0656083	-0.0252444	-0.119967	-1.55458	-1.46615	-1.06407	-1.46164	-1.48093	-1.55458	-0.897927	-1.44859	-1.47078	0	0.104503	0.127897	0.208096	0	0.100088	0.00554856	0.0964913	0.154684	0.0348428	-0.0681989	0.0871099	-0.0681989	0.0907063
AC010273.1	0.0464103	-0.0255734	-0.056568	-0.00642279	-0.0342582	-0.0736033	-0.073917	0.00365613	0.0949842	-0.105587	-0.114658	0.0421051	-0.0225906	-0.0645428	-0.0161089	0.295504	0.0605187	-0.0143496	0.0336381	-0.0057215	-0.0101961	-0.0665147	-0.0558	-0.104747	-0.0272787	0.0651592	0.287544	0.131646
AC010273.2	-0.0688439	-0.0684501	0.169215	-0.0687925	-0.0684272	0.00125742	0.065105	-0.146002	0.0644939	0.118185	0.0315928	-0.146002	-0.0979575	-0.10544	0.000660068	0.00045887	0.000440757	0.38124	0.00624789	0.000211006	0.239362	-4.35e-05	0.0944361	0.0955846	0.24424	0.104508	0.0019271	8.57e-05
AC010275.1	-0.0154142	-0.013799	-0.0132063	-0.0131582	-0.00985924	0	0	0.0535814	0	0	0	0.133928	0	0	0.00219982	0.00106819	0.000396627	0.0685445	0.0105637	0.0475084	-0.00726287	-0.00968106	-0.0104645	-0.00891408	-0.00928897	-0.00839072	-0.0107928	-0.00765733
AC010280.1	0	0	0	0	0	0	0	0	0	0	0	0	0	0.0602104	0	0	0	0.239147	0	0	0	0	0	0	0	0	0	0
AC010280.2	-0.0492683	-0.122939	-0.0341295	0.0290696	-0.126331	0.425989	0.776047	0.51572	0.935362	0.862615	0.888515	1.02685	0.664928	0.875361	0.180875	0	0	0.558889	0	0.168233	0.753084	0.19095	0.17289	0	0.540387	0.167283	0	0.187275
AC010280.3	-0.043376	-0.0415817	-0.0889693	-0.0889693	-0.0889693	0.0769008	0.153814	0.656925	0.582363	-0.0142577	-0.0224096	-0.0120833	-0.153859	0.0570683	0.464114	-0.0307451	0.106419	0.950777	-0.0313702	-0.169176	-0.384399	-0.235475	-0.27928	-0.395604	-0.498713	-0.468614	-0.437297	-0.578887
AC010285.1	0	0	0	0	0	0	0	0	0	0	0	0	0	0	0	0	0	0	0	0	0	0	0	0	0	0	0	0
AC010300.1	-0.00387445	-0.00387445	-0.00387445	-0.00387445	-0.00387445	-0.00730337	-0.00375742	-0.00730337	-0.00416738	-0.00730337	-0.00730337	-0.00372317	-0.00730337	-0.00289906	-0.0421227	0.0509411	-0.0260003	0.0446863	0.0646286	-0.00194412	-0.0119505	-0.0119505	-0.0119505	-0.0119505	-0.0119505	-0.00704573	-0.0119505	-0.00706206
AC010307.2	8.32397e-05	7.24614e-05	0	0	0	0	0.0634163	0.132974	0	0	0	0.0644697	0.0525098	0.0370409	0.11372	0	0	0.276286	0	0	0	0	0	0	0	0.000186431	0.106626	0
AC010307.3	0	0	0	0	0	0	0	0	0	0	0	0	0	0.00501075	0	0	0	0	0.0195336	0	0	0	0	0	0	0	0	0
AC010307.4	0	0	0	0	0	0	0	0	0	0	0	0	0	0.114544	0	0	0	0	0	0	0	0	0	0	0	0	0	0
AC010319.2	0.0063645	-0.00246703	-0.0121054	-0.0121054	-0.00820632	0	0.0250055	0.0287942	0	0	0	0	0	0.0136667	0	0	0.0234863	0	0.0385831	0.0180284	0.0287453	0	0.106846	0.00603885	0.125098	0.0157207	0.00411886	0.0128725
AC010319.3	0.0646272	0	0	0	0	-0.0657818	0.0607059	0.0659398	-0.0657818	-0.0153093	-0.0657818	-0.0657818	-0.0171204	-0.0657818	0.00305794	0	0	0.00216126	0	0	0	0	0	0	0	0	0	0
AC010319.4	0	0	0	0	0	0	0	0	0	0	0	0	0	0	0.267628	0.102088	0.146657	-0.233159	-0.147097	0	0	0	0.084162	0.0504707	0	0	0	0
AC010319.5	0	0	0	0.0374355	0	0	0	0	0	0	0	0	0.0258753	0	0	0	0.0936414	0	0	0	0	0	0	0	0	0	0	0
AC010320.1	0.214549	0.0682361	0.0701624	0.204507	0.116749	-0.0480557	-0.0533572	-0.0593073	-0.0488944	-0.0430496	-0.0472836	0.146209	-0.107412	-0.116603	0.191504	0.109577	0.337989	0.186492	0.277819	0.141027	-0.0981686	0.228913	-0.0159909	-0.0981686	0.016525	0.0165553	0.156662	0.0187796
AC010320.2	0.0567042	0	0.0538491	0	0.0485189	-0.0536648	-0.0536648	-0.0536648	0.129794	-0.0152762	-0.0536648	0.656908	-0.0207027	-0.0297549	0.0141964	-0.271485	-0.258511	-0.264625	0.0507749	0	0.0654862	0.0700257	0.0348511	0.174686	0.0826575	0.120857	0.180768	0
AC010320.3	-0.250937	-0.250937	-0.250937	-0.250937	-0.250937	0.73183	0.0692646	0.153227	0	0.105683	0	0.170618	0.154662	0.0888216	0.27472	0.602885	0.182567	0.331559	0.16081	-0.275967	-0.358451	-0.470155	-0.388254	-0.0916957	-0.318817	-0.304923	-0.0758924	-0.0796149
AC010320.4	0.225476	0.145749	0.382748	0.215898	0.148001	0.0334042	0.184974	0.206745	0.141213	-0.0774902	-0.0838273	0.197063	-0.0374039	0.0309188	0.00873162	0.00564454	-0.170138	0.00353401	0.0239847	0.0570928	-0.0813178	0.0184632	-0.00603445	0.0450166	0.201768	0.0905011	0.109046	0.184347
AC010323.1	-0.965672	-0.964666	-0.965517	-0.540059	-0.967172	-0.0475916	-1.31717	-0.729252	-1.31717	-1.31717	-1.31717	-0.491716	-1.31717	0.190783	-2.29078	-2.27377	-2.28548	-2.2824	-2.28297	-0.00187354	0.622007	1.22862	0.00424988	-0.00132801	1.51245	-0.00385965	0.0371853	1.23003
AC010325.1	-0.567556	-0.195856	-0.429633	-0.49583	-0.32126	0.237158	-0.822618	-1.10133	-0.380654	-0.765752	-1.00533	-0.77943	-0.942631	-1.04167	-0.188438	-0.110488	0.150977	-0.256911	0.0470088	0.563651	0.312801	0.0301034	-0.117189	0.391693	-0.629275	-0.795187	-0.400414	-0.874969
AC010325.2	-0.224781	0.0230333	0.0025319	0.0196781	-0.224781	-0.0145794	0.114045	-0.405085	0.182665	-0.0243342	-0.205324	-0.405085	-0.405085	-0.274892	0.360247	0.392948	0.388072	0.375598	0.366732	0.752432	-0.213944	0.40692	0.00532558	0.20815	0.947741	0.22601	0.663269	0.620274
AC010326.2	-0.104808	0.0159114	0.0198617	-0.172673	-0.0507201	0.0975339	0.0736504	-0.00062269	0.0305685	-0.0313192	0.107385	0.0495202	0.661591	0.299048	-0.00367004	-0.0160058	-0.111033	0.0200033	0.0578051	0.0447258	0.100857	0.25842	0.0880347	0.216491	0.140301	0.131864	0.181453	0.0204629
AC010327.1	0.00309768	0.00223156	-0.00338447	0.00290619	-0.00199478	0	0	0	0	0	0	0	0	0	-0.00426802	0.0185994	-0.00426802	-0.00426802	0.0159	0.000516104	0.00987848	0.00715612	0.00233734	5.93e-06	-0.00438519	0.00643353	0.00811153	0.00151224
AC010327.3	-0.328429	-0.251834	-0.331434	-0.589249	-0.360957	0.261915	0.453802	0.56332	0.237373	0.251694	0.227333	0.194849	0.198541	-0.265724	0.332273	0.641432	0.365938	0.884799	0.214203	-0.304583	-0.231149	-0.12057	-0.221152	-0.285717	-0.711117	-0.698344	-1.13194	-0.438651
AC010327.4	0	0	0	0	0	0	0	0	0	0	0	0	0	0.0333372	0.0688661	0.0843533	0	0.147044	0.573032	0	0	0	0	0.0385035	0	0	0	0.0303581
AC010328.1	0.00456663	0.0287701	0.00969012	0.00531603	0.00472375	0.00635783	0	0	0.00892813	0.0201051	0.0215394	0.0128004	0.00407025	0.00259372	0.0195959	-0.034215	0.0273849	-0.029431	-0.0311274	5.99e-05	0.0163545	0.0181378	0.0175974	0.00690045	0.00889153	0.0112856	-1.37e-05	0.00633799
AC010329.1	0.0106804	0.00250473	-0.032598	-0.00188936	-0.0183235	-0.000610983	0.0238747	-0.00429337	0.0192757	-0.00197521	-0.0017082	-0.00706928	0.0160745	0.0610279	-0.117491	-0.0604361	8.41e-05	-0.120063	-0.113857	0.014065	0.0236797	0.0405382	0.0508667	0.048957	0.0723171	-0.00116317	0.000588676	-0.0166802
AC010331.1	0.310605	-0.168164	-0.131674	0.0501331	0.3517	-0.259565	0.146679	-0.0961682	-0.224167	-0.121444	-0.0974637	-0.183746	-0.391382	-0.552297	-0.696625	-0.290156	-0.866743	-0.506566	-0.896994	0.388111	0.457875	0.494915	0.517196	0.480673	0.304827	0.26348	0.0689103	0.50446
AC010333.1	0	0.0246975	0	0	0	0	0	0	0	0	0	0	0	0	0.239606	-0.152155	0.118968	-0.152155	-0.0216273	4.4e-05	0.000148553	0	0	0	0	0	0.000472657	0
AC010333.2	0	0	0	0	0	0	0	0	0	0	0	0	0	0	0.0880763	0	0	0.0942059	0.0910335	0	0	0.0488503	0	0	0	0	0	0
AC010333.3	0.100909	0	0	0	0	0	0	0	0	0.0633791	0	0	0.0611561	0	0.185739	0	0	0	0	0.102708	0	0	0	0	0.139843	0	0	0.186761
AC010335.1	-0.0790869	-0.0790869	-0.0790869	-0.0790869	-0.0790869	-0.0503255	0.0371661	-0.0503255	0.0557231	-0.0503255	-0.0503255	-0.0503255	-0.0503255	-0.0503255	-0.137142	-0.00502965	0.0838198	-0.138155	-0.0292602	0.0564839	0	0	0.0532218	0	0	0	0.0630977	0
AC010336.1	-0.0091837	-0.0235115	-0.0210106	-0.0101324	-0.00266241	-1.07e-05	-0.0304862	-0.0139177	0.0081567	-0.00146753	-0.00348434	0.0048946	0.11564	0.0995697	-0.00862623	0.0381629	0.0451639	0.0676848	0.0791558	0.0437885	0.051759	0.00925397	0.0154746	0.0407912	0.0517135	-0.00150969	-0.0156409	-0.0376391
AC010336.2	-0.0061224	-0.129693	-0.136233	-0.0646916	-0.0277532	0.00163947	0.199235	0.0659382	-0.0220267	0.102141	0.175011	0.275971	0.0523929	0.20327	0.210644	0.0957517	0.272813	-0.0146136	0.355439	-0.133406	0.136986	0.0482661	-0.182679	-0.11522	0.0437971	0.153226	-0.10247	0.0809973
AC010336.3	0	0	0	0	0	0	0	0	0	0	0	0	0	0	0	0	0	0	0	0	0	0	0	0	0	0	0	0
AC010336.4	0	0.07545	0	0	0	0	0	0	0	0	0.0812809	0	0	0	0.168946	0.235397	0.325244	0.18489	0.00132074	0	0	0	0	0	0	0	0	0
AC010336.6	0.0154779	-0.0489736	-0.0489736	-0.0489736	-0.0489736	-0.108157	-0.108157	-0.0488688	-0.0622391	-0.108157	-0.108157	-0.0552246	-0.108157	-0.0690532	0.000161372	0.000600311	0.000164377	0	0	0	0	0	0	0	0.0928412	0	0	0
AC010343.3	0.239578	0.0269506	0.198682	0.0294628	-0.000346741	0.99301	0.805966	0.498067	0.635013	0.168343	0.116369	0.173708	0.112754	-0.387637	-1.26801	-0.570364	-1.32135	-0.932307	-1.30985	-0.175032	0.0252437	-0.750027	-0.982969	-1.1202	-1.72059	-1.78088	-1.98491	-1.7891
AC010359.1	0.0033717	-0.601716	-0.341863	0.0234203	0.0562994	0.274838	0.311862	0.266931	-0.220262	0.224277	0.297817	0.0692487	0.550503	0.508646	-0.707011	-0.162986	-0.551563	-0.234495	-0.492272	-0.135119	-0.152174	-0.220742	-0.507336	-0.295299	-0.522458	-0.331158	-0.171519	-0.124544
AC010387.1	0	0	0	0	0	0	0	0	0	0	0	0	0	0	0	0	0	0	0	0	0	0	0	0	0	0	0	0
AC010395.1	0	0	0	0.0421017	0	0	0	0	0	0	0	0	0.0307583	0	0	0	0	0	0	0	0	0	0	0	0	0	0	0
AC010401.1	-0.0189702	-0.0282556	-0.0120344	-0.0141322	-0.0106866	-0.0224875	-0.0010428	0.00105209	-0.0173005	-0.013407	-0.0222541	0.0503341	-0.0161109	-0.0249863	0.0861745	0.039637	0.166499	-0.00726156	0.319237	0.0261308	0.00858466	0.0118098	-0.000184164	0.0918991	0.0225048	-0.00954341	0.0400431	0.00921342
AC010401.2	0.0502126	-5.81394e-05	9.42472e-06	-3.12094e-05	-5.81394e-05	0	0	0	0	0	0	0	0	0	0.000519069	4.69e-05	8.38e-05	0.12051	0.00214644	0.0587838	0	5.53e-05	0.0555834	0.0670415	0.000285027	0.000101676	0	0.0588794
AC010406.1	0	0	0	0	0	0	0	0	0	0	0	0	0.0344794	0.025029	0	0	0	0	0	0.00447559	-0.0741254	-0.0741254	0.0596163	-0.0741254	-0.0741254	-0.0741254	-0.0741254	-0.0741254
AC010420.1	0	0	0	0	0	0	0	0	0	0	0	0	0	0	0	0	0	0	0	0	0	0	0	0	0	0	0	0
AC010422.1	-0.155712	-0.0493323	-0.00156939	-0.111978	-0.206637	0.0659207	0.190166	-0.0468641	0.137958	-0.0703749	-0.00336287	0.163208	0.602372	0.458769	-0.0334043	-0.221519	-0.461343	0.11292	0.128733	-0.0790553	-0.0380391	-0.0634425	0.19164	-0.130732	-0.0399836	-0.0793579	0.0888288	0.147445
AC010422.2	-0.100183	-0.106806	-0.0607091	-0.0594727	0.0129332	0.477072	0.287956	0.0900734	0.0424082	0	0.258551	0.0402126	7.7693	3.86005	-0.015722	-0.114741	-0.114412	-0.114603	-0.114741	0.224568	0.109346	0.08077	-0.0316826	0.0239949	-0.140701	-0.0872318	0.0525328	-0.0863328
AC010422.3	0.309242	0.290508	-0.18069	0.192865	-0.340974	-0.0623854	-0.298714	0.313134	-0.270269	0.136953	0.135383	-0.343752	-0.219638	-0.368797	0.11781	0.47476	1.374	0.56043	0.84621	0.37795	0.127241	-0.0148686	-0.000862761	-0.267962	0.472711	0.100279	-0.249707	-0.19115
AC010422.5	-0.0436705	-0.452766	0.0470976	0.433459	0.229004	-0.553176	-1.07838	-0.586966	-1.09541	-1.00662	-0.899808	-0.313189	-0.447492	-1.1494	-0.764922	-1.07858	-0.750629	0.153824	-0.75573	-0.002593	0.0124445	0.00375754	0.00123526	0.0024677	0.0104269	-0.0034202	0.0145676	-0.00500388
AC010422.6	0.117131	-0.0832227	-0.0135068	0.0662017	-0.0861295	-0.0929426	0.0382956	0.0124954	0.106175	0.0853593	0.062982	0.06238	0.10887	0.0360703	0.213317	0.38921	0.290793	0.287738	0.452429	-0.0306201	-0.0801589	0.0760122	0.173131	0.190549	0.153478	0.194706	0.176451	0.0914195
AC010424.2	0	0	0	0.076316	0	0	0	0	0	0	0	0	0	0	0	0	0	0	0	0	0	0	0	0	0	0	0	0
AC010424.3	0	0	0	0	0	0	0	0	0	0	0	0	0	0	0	0	0	0	0	0	0	0	0	0	0	0	0	0
AC010425.1	0	0	0	0	0	0	0	0	0	0	0	0	0	0	0	0	0	0	0	0	0	0	0	0	0	0	0	0
AC010445.1	0	0	0	0	0	0	0	0	0	0	0	0	0	0	0	0	0	0	0	0	0	0	0	0	0	0	0	0
AC010451.1	0	0	0	0	0	0	0	0	0	0	0	0	0	0	0	0	0	0	0	0	0	0	0	0	0	0	0	0
AC010451.2	0	0	0	0	0	0	0	0	0	0	0	0	0	0	0	0	0	0	0	0	0	0	0	0	0	0	0	0
AC010451.3	0	0	0	0	0	0	0	0	0	0	0	0	0	0	0	0	0	0	0	0	0	0	0	0	0	0	0	0
AC010457.1	-0.601951	-0.369415	-0.79064	-1.0596	-0.582633	0.184652	0.270145	0.275465	-0.0375832	-0.0211428	0.209361	0.68988	-0.234691	-0.479866	0.866247	1.14574	1.41802	0.959996	0.943202	0.0335941	0.431556	0.417011	0.611433	0.703589	0.875148	0.594494	0.568418	1.17036
AC010463.1	-0.0821675	-0.0349632	-0.0857194	-0.00395859	-0.100148	-0.00169951	0.0239625	-0.174229	-0.0792495	-0.123153	-0.10642	-0.0993415	-0.0402065	-0.00444317	-0.133875	-0.244755	-0.181312	-0.0774593	0.00224223	-0.00990751	0.146008	0.24783	0.0642896	0.0305486	0.0783414	0.0200128	0.0753973	0.040694
AC010463.2	0	0	0	0	0	0	0	0	0	0	0	0	0	0	0	0	0	0	0	0	0	0	0	0	0	0	0	0
AC010468.2	0	0	0	0	0	0	0	0	0	0	0	0	0	0	-0.148305	-0.148305	-0.148305	-0.148305	-0.148305	0	0	0	0	0	0	0	0	0
AC010478.1	0	0	0	0	0	-0.0286953	-0.0233127	-0.0193799	-0.0286953	-0.0286953	-0.0286953	-0.0253891	-0.0224577	-0.0241667	0.033017	0	0	0	0	0	0	0	0	0	0	0	0	0.00368212
AC010485.1	-0.0952114	-0.0658777	-0.0971267	-0.0619247	-0.0693467	-0.0666712	0.00723614	-0.0291288	-0.0267718	0.00818436	-0.0193471	-0.0199366	-0.0125649	0.00414684	0.0285318	-0.135076	0.114168	-0.0358677	-0.0216364	-0.0182834	-0.01833	-0.0759404	-0.0694453	-0.0986922	0.0894391	-0.0654819	0.166199	-0.0266353
AC010486.1	0	0	0	0	0	0	0	0	0	0	0	0	0	0	0	0	0	0	0	0	0	0	0	0	0	0	0	0
AC010486.2	0	0	0	0	0	0	0	0	0	0	0	0	0	0	0	0	0	0	0	0	0	0	0	0	0	0	0	0
AC010486.3	0	0	0	0	0	0	0	0	0	0	0	0	0	0	-0.0671954	-0.0671954	-0.0671954	-0.0671954	-0.05922	0	0	0	0	0	0	0	0	0
AC010487.2	0.139841	-0.160844	0.0404858	0.0843912	0.143063	0.318395	0.192497	0.205422	0.381739	0.052987	0.0238614	-0.129082	0.046314	0.080882	-0.413841	-0.542406	-0.719485	-0.71925	-0.44343	0.202769	-0.14523	-0.23678	-0.23903	0.0469684	-0.135162	-0.256358	-0.0719754	-0.12474
AC010487.3	0.0488957	0.0698761	-0.006892	-0.415603	-0.404184	-0.203939	-0.111621	-0.178867	-0.376807	0.0228452	0.0194239	0.142829	0.0340362	-0.210164	0.274129	0.0634464	-0.0828061	0.215529	0.276091	0.316969	0.363159	0.0714213	0.349466	0.242246	0.157313	0.39281	0.579499	0.44818
AC010491.1	0.0374432	-0.00183208	0.085228	0.0494017	0.110741	0.189001	0.104318	0.0967863	0.0335309	0.122977	0.0225456	0.0144845	0.159516	0.0481455	-0.169282	0.0734252	-0.0445166	-0.0232582	-0.00320358	-0.059906	-0.239759	-0.041929	-0.0815609	-0.150108	-0.175077	-0.217554	0.0130621	0.00353027
AC010501.1	0.0407257	0.0183649	0.0163473	0.00824273	0.0043718	0.000711022	0.00863022	0.0231195	-0.000981724	-0.0110378	0.00282463	0.0149665	-0.00230693	-0.0139587	0	0	0	0	0	0	0.0181979	0	0	0	0	0	0	0
AC010503.1	0	0	0	0	0	0	0	0.0986533	0	0	0	0	0	0	0.040508	0	0.0551784	0	0	0	0	0	0	0	0	0	0	0
AC010503.2	0	0	0	0	0	0	0	0	0	0	0	0	0	0	0	0	0.000530009	0	0	0	0	0	0	0	0	0	0	0
AC010503.4	0	0	0.000815729	0	0	-0.0411616	-0.0059003	-0.0411616	0.0470017	-0.00979099	0.0319681	0.00265442	-0.0411616	0.0271605	-0.0874008	0.212468	-0.170556	-0.0698977	-0.177187	-0.0438244	0.0308934	-0.0829174	-0.046817	-0.091118	-0.00536809	-0.00479346	-0.0383364	-0.0909961
AC010504.1	0.0648066	-0.00616991	0.198306	0.150374	-0.0942096	0.0807428	0.324273	0.295424	0.297863	0.417444	0.522512	0.262744	0.78396	0.704817	0.836197	0.501061	0.453882	0.488751	0.447576	-0.159842	-0.139903	-0.07908	0.02646	-0.187731	0.161752	-0.191515	0.411793	-0.0210226
AC010511.1	0	0	0	0	0	0	0.0507108	0.0479855	0	0	0.0481051	0.891834	12.0547	11.384	0	0	0	0	0.209498	0	0	0	0	0	0	0	0	0.0670975
AC010519.1	-0.100244	-0.100244	-0.100244	-0.100244	-0.100244	-0.0342713	0.0777215	-0.113757	0.0895802	0.167551	0.182961	-0.113757	0.0386027	-0.113757	0.378262	0.357581	0.814297	0.000138047	0.411754	-0.161788	-0.161787	-0.161788	0.112031	-0.0372535	-0.161788	-0.0412804	-0.161788	-0.161788
AC010522.1	0.524845	0.0751436	0.294218	0.0424921	-0.355697	0.0833715	0.0337158	-0.0968759	-0.012131	-0.0627783	-0.0982478	-0.0534707	-0.112883	-0.499644	0.220926	0.532729	0.361755	0.287887	-0.191971	0.0190212	0.160944	0.0623723	0.340878	0.102682	0.528939	0.0630294	0.249248	0.175805
AC010524.1	0	0	0	0	0	0	0	0	0	0	0	0	0	0	-0.290358	-0.13118	-0.123328	-0.443925	0.10759	0	0	0	0	0	0	0.0739491	0.17902	0
AC010525.1	0	0	1.0195e-07	0	0	0	0	0	0	0	0	0	0	0	0.122338	-0.0655432	0.272891	0.0794729	-0.0377488	0	0	0	0	0	1.55e-05	2.34e-06	0	0
AC010528.1	0	0	0	0	0	0	0	0	0	0	0	0	0	0	0	0	0	0	0	0	0	0	0	0	0	0	0	0
AC010531.1	0.0399233	-0.195526	-0.0645471	-0.158341	-5.13294e-05	0.0918028	0.0493284	-0.0961935	0.38643	0.196203	0.25375	0.385169	0.0263236	-0.159143	-0.474629	-0.135845	-0.506925	-0.380788	-0.938355	0.329756	0.409582	0.305252	0.279113	-0.290552	-0.240209	0.160084	0.525854	0.141083
AC010531.3	-3.69329e-06	0.0582897	-3.69329e-06	4.90396e-05	-3.69329e-06	0	0	0.0619481	0	0	0	0.082461	0	0.0323083	-0.35687	0.0820516	-0.0585068	-0.114047	-0.211055	-0.0922781	0.0423267	-0.0922805	-0.0242652	-0.0261925	-0.0918897	-0.0922805	-0.0922805	-0.0921975
AC010531.5	0.204502	0	0.144976	0.135491	2.39485e-05	0	0.135007	0	0.0709741	0.501312	0.336082	0	0.281677	0.0489829	0.211492	-0.0580249	-0.138356	-0.271922	-0.436483	0	0	0	0.150369	5.26e-05	0.117384	0	0.112432	0.2259
AC010531.6	0.397186	0.46094	0.228674	0.0133933	0.745664	-0.240898	-0.0400854	0.0381909	0.0558831	0.264959	0.344573	0.607122	0.422663	0.231643	-0.00298393	-0.681006	-0.85153	-0.517962	-0.87523	0.362618	0.341231	0.118659	0.455229	0.408763	-0.133955	-0.545262	0.0441487	0.22739
AC010531.7	0	0	0	0	0	0	0	0	0	0	0	0	0	0.0622445	0.000269931	-5.75e-05	-0.000671851	0.000968746	0.000242353	0	0	0	0	0	0	0	0	0
AC010536.1	0.0863635	-0.0557061	-0.0610498	-0.0467014	-0.0657651	-0.00221745	-0.12707	-0.156727	-0.2082	-0.247347	-0.252874	-0.293399	-0.267411	-0.274209	-0.233601	-0.28097	-0.387675	-0.272052	-0.161931	-0.0382755	0.049147	-0.0175239	-0.0575642	-0.0413146	-0.01525	-0.111668	0.0569344	-0.249372
AC010536.3	0.225251	0.119098	-0.147874	0.0762889	0.00898887	0.0898929	0.183337	0.0998649	0.0709602	0.0670898	0.0596948	0.165124	0.12864	0.166927	0.139013	0.11804	0	0.130513	0.355084	-0.0786836	-0.0786836	0.107584	0.0939291	-0.0786836	0.0898525	0.0455472	0.321714	0.173032
AC010538.1	-0.132367	-0.220297	0.0679259	0.0646422	-0.195877	-0.402916	-0.198909	-0.159935	-0.0831206	0.0928398	0.115283	-0.230803	0.0588916	0.132007	0.281772	0.0507698	0.241092	0.272745	0.123804	0.0629506	0.183705	-0.250922	-0.0409563	-0.0262267	-0.225292	-0.0856823	-0.325667	-0.265302
AC010542.1	0	0	0.0531276	0	0	0	0	0	0	0	0	0.0597516	0.437237	0.839012	0.117535	0.112229	0	0.125243	0.120968	0	0.0817053	0	0	0	0	0	0.082851	0
AC010542.2	0	0	0	0	0	0	0.0548277	0	0.0483042	0	0	0.138632	0.0461737	0	-0.00129697	-0.0016843	-0.00107432	-0.00055371	-0.00153158	-0.0838388	-0.0838388	-0.0838388	-0.0838388	0.0587857	-0.0838388	-0.0838388	-0.0838388	-0.0135924
AC010542.3	0.0904008	-0.0078187	0.0498426	-0.0113638	-0.000558056	0	0.0457596	0.0433508	0	0	0.0497191	0	0.0638847	0.0269212	0.116509	-0.000369397	0.212561	0.097078	0.0902523	-0.000199068	-0.000106657	-0.000588565	-4.26e-05	0.0748668	0.00115656	0.0387865	0.000774019	-0.000481849
AC010542.4	-0.0459486	-0.0240445	-0.000981708	0.0248656	-0.014619	0.214787	0.0310581	0.18278	0.236283	0.231243	0.130355	0.163513	0.349969	0.181978	0.10549	0.0763687	0.0279952	0.156027	0.0910377	0.0375863	0.100916	0.046247	0.0677377	0.0450113	0.0658573	0.065591	0	0.0258484
AC010542.5	-0.192935	-0.192935	-0.192935	-0.192935	-0.192935	0	0	0	0	0	0.0958239	0.130231	3.46463	0.155863	-0.347602	-0.805412	-0.462108	-0.63565	-1.04737	0	0	0	0.158406	0	0.191332	0.11395	0.124454	0.111101
AC010547.1	0.0289182	0.264893	0.677095	0.0141173	0.0200571	0.149844	0.00605098	0.213498	0.00772634	0.456356	0.0465211	0.27603	0.720213	0.163357	-0.0370753	-0.00268735	0.00352975	-0.0158883	0.34872	0.264081	0.297429	0.00269455	0.00688303	0.0399798	0.350872	0.014806	-0.0252698	0.0960757
AC010547.3	0	0	0	0	0	0	0	0	0	0	0	0	0	0	0	0	0	0	0	0	0	0	0	0	0	0	0	0
AC010547.4	0.14288	0.316164	0.22255	-0.017779	-0.261939	-0.0621098	0.00856648	-0.0552228	-0.0313618	-0.11702	-0.127336	-0.0927848	-0.05523	-0.287778	-0.132377	-0.0733007	-0.103606	-0.232759	-0.119655	0.300043	0.132755	0.272076	0.0190794	0.176788	0.388803	0.126755	0.581615	-0.0195723
AC010551.1	0	0	0	0	0	0	0	0	0	0	0	0	0.043526	0	0	0	0	0	0	0	0	0	0	0	0	0	0	0
AC010551.2	0	0	0	0	0	0	0	0	0	0	0	0	0	0	0	0	0	0	0.176936	0	0	0	0	0	0	0	0	0
AC010551.3	0	0	0	0	0.0719855	0	0	0	0.0565032	0	0	0	0	0	-0.377134	0.291883	-0.190114	0.520117	0.937555	0	0	0	0	0	0	0	0.107668	0
AC010595.1	0	0.000203651	0.00618263	9.00175e-05	0.000159815	0	0	0	0	0	0.0155528	0.0140616	0	0	0	0	0.000178514	0.146622	0.0137941	-0.0243426	-0.0245897	-0.0243479	-0.0132806	-0.00249027	0.00201576	-0.024487	-0.0245897	-0.0245897
AC010601.1	0.218164	-0.000287655	0.363492	0.00861599	0.00526953	-0.110115	0.0323407	0.0858348	0.129415	0.13819	0.180498	0.0852666	0.232457	0.118377	0.393218	0.257755	0.80579	0.341207	0.0947049	-0.0191099	-0.309939	0.00643963	0.118198	0.148145	0.0315779	0.108767	0.0958097	0.234174
AC010605.1	0.000275239	0	0	0	0	-0.030508	-0.00148032	-0.030508	-0.030508	-0.030508	-0.030508	-0.030508	-0.030508	-0.030508	0.0675241	-0.0859686	-0.0912666	0.134665	-0.0134384	-0.000477601	0.0493848	-0.000477601	-0.000477601	-0.000477601	-0.000477601	-0.000294856	0.0429238	-0.00046753
AC010608.1	0	0	0	0	0	0	0	0	0	0	0	0	0	0	0	0	0	0	0	0	0	0	0	0	0	0	0	0
AC010609.1	0	0	0	0	0	0	0	0	0	0	0	0	0	0	0	0	0.259158	0	0	0	0	0	0	0	0	0	0	0
AC010615.4	0.00013103	0.00300549	0.191845	0.000777293	-0.00136446	0	0	0	0.0658566	0	0	0	0.0515686	0	0.0184629	0.0123441	0.254239	0.0821259	0.026808	-0.142788	-0.142059	-0.144118	-0.135406	0.00433685	0.0988381	-0.147961	-0.120755	-0.148774
AC010616.1	0.0538848	-0.044041	-0.0031604	0.0717901	-0.00608022	0.031014	-0.0135589	0.021092	0.0268994	0.00282219	0.0210907	0.0304241	0.0185917	0.501961	0.16976	-0.0097011	0.153477	0.0611672	0.0576399	0.0365215	0.0520766	0.0298632	-0.0237285	0.0339667	0.126254	0.0998089	0.107728	-0.0290999
AC010616.2	0.016104	-0.0118633	0.00418081	0.0105479	0.0092723	0.0181912	0.00363906	0.0164913	-0.00215459	0.00103535	0.000330148	0.0593381	0.0359139	0.107232	0.00329504	0.0332365	0.0286856	0.0419198	0.0563554	0.00524194	0.0145337	-0.0114679	-0.0111556	-0.00117724	-0.00916439	-0.0136979	-6.89e-05	-0.0117898
AC010618.2	0	0	0	0	0	0	0	0	0	0	0	0	0	0	-0.779414	-0.779414	-0.298963	-0.45819	-0.6249	0	0	0	0	0	0	0	0	0
AC010618.3	-0.0182601	-0.107377	-0.0801878	0.17184	0.00677594	0.0507159	0.0854213	0.138332	0.490568	0.327495	0.398296	0.131225	0.800739	0.773178	0.136425	0.33169	0.813629	-0.0386598	0.124573	-0.162296	-0.237535	0.228636	0.245112	0.0890086	0.344283	0.361747	1.03641	0.316714
AC010619.1	0.0132549	-0.0529503	-0.0502793	-0.0509485	-0.049192	0	0	0	0	0.0622531	0	0	0.0581619	0	-0.00595464	-0.0145816	-0.00575222	-0.00595055	-0.0150093	0.104519	0.00444169	0.00201297	0.0728017	0.0568764	0.015187	-8.95e-05	-0.00210621	-0.00067222
AC010624.2	-0.0379389	0.00826353	-0.0429359	-0.034692	-0.0429359	0.062726	0	0	0	0	0.0504623	0.0465081	6.40574	11.128	0.144184	0.142183	0.0182523	0.0147348	0.0282766	-0.0526107	0.0234032	-0.0526107	-0.0412256	-0.0526107	-0.0526107	0.0359939	0.0710266	0.0188264
AC010624.3	0	0	0	0	0	-0.050212	-0.050212	0.00267867	-0.050212	-0.0127664	-0.050212	0.00842498	0.0241376	0.0378376	-0.288439	-0.177809	0.0217716	-0.166092	-0.15991	-0.0491038	0.0678463	-0.0485921	-0.0491038	0.0736304	0.0353776	-0.0491038	0.0307481	0.171937
AC010632.1	0	0	0.0507464	0	0.0478971	-0.0539493	0.0393794	-0.0539493	-0.0539493	-0.0539493	-0.00980001	0.0164083	-0.0168039	-0.0539493	0.0784033	0.248155	0.207699	0.145555	-0.0313437	-0.0358945	0.018968	-0.0961012	-0.0275416	-0.0275065	-0.0961012	0.129064	-0.0166328	0.0225033
AC010634.1	0	0	0	0	0	0	0	0	0	0	0	0	0	0	0	0	0	0	0	0	0	0	0	0	0	0	0	0
AC010636.1	0.154548	0.0735872	-0.0193352	0.173978	0.199356	1.28696	-0.201662	-0.176835	-0.608699	-0.662697	-0.729197	-0.729197	-0.631931	-0.704608	-0.0985871	-0.313086	-0.0595707	-0.449236	-0.912963	0.122567	0.191739	0.168238	-0.0962756	0.21901	-0.0499698	-0.143433	-0.132201	-0.13889
AC010636.2	0.307853	0.203398	-0.0162878	-0.476247	-0.36041	0.0820682	1.12754	0.561723	0.360405	0.385318	0.276013	0.711387	0.83665	0.820383	-1.08878	-0.0115847	-0.366728	-0.469809	-0.711563	-0.290422	-0.0443464	0.215315	-0.898157	-0.374517	0.0354385	0.108227	-0.174253	0.258927
AC010638.1	0	0	0	0	0	0	0	0	0	0	0	0	0	0	0.357892	0	0	0	0	0	0	0	0	0	0	0	0	0
AC010641.1	0	0	0	0	0	0	0	0	0	0	0	0	0	0	0	0	0	0	0	0	0	0	0	0	0	0	0	0
AC010642.2	-0.111377	0.0468797	0.0776851	0.174107	0.221507	0.0431502	0.126113	0.238427	0.247414	0.22187	0.184403	0.592425	0.63614	0.392718	0.236709	0.415424	0.300494	0.617668	0.623648	-0.203709	-0.0326333	-0.145251	0.0804097	0.0905423	0.122187	-0.0297937	0.13806	0.237755
AC010643.1	-0.00624119	-0.00624119	0.000721041	-0.00624119	1.32633e-05	0	0	0	0	0.00532525	0.00640898	0	0	0	0.0154398	0.0271219	0.0855669	0.0224781	0.0187767	0.0053886	0	0.00937744	0	0.0178409	0	0	0	0.00785091
AC010646.1	0.0798452	-0.0568434	0.0781935	0.0100883	0.00487948	0	0.109637	0	0	0.28267	0.340665	0	0.648438	0.072601	0.151368	0.00108049	0.163226	6.43e-05	0.152358	0.0746721	0.26743	-6.98e-05	0.107416	0.166912	0.00132874	0.142228	0.0789716	0.165762
AC010649.1	0	0	0	0	0	0	0	0	0	0	0	0	0	0.158727	0	0	0.293216	0	0	0	0	0	0	0	0	0	0.148384	0
AC010654.1	0.227172	0.164231	0.0215208	0.0534444	0.0149528	0.0374347	0.0587904	-0.0620558	-0.124351	0.164264	0.198592	-0.169176	0.0710636	-0.000665941	0.265359	0.208301	0.362479	0.809589	0.451633	0.135798	0.236074	0.591442	0.0844748	0.169494	0.305209	-0.221368	0.0482119	-0.0569506
AC010680.1	0	0	0	0	0	0	0	0	0	0	0	0	0	0.00435933	0	0.0283849	0.0172663	0	0	-0.0182343	-0.0182343	-0.0182343	-0.0182343	-0.0182343	0.00241111	-0.0117785	-0.0182343	-0.0182343
AC010680.2	0.184598	0.0934546	0.117946	-0.060851	-0.141469	0.142441	0.125542	0.0983264	-0.0377101	0.0985219	0.0738362	-0.097408	-0.332081	-0.299667	0.0942138	-0.0774023	0.198863	0.0229406	-0.00348046	0.175918	0.325545	0.415577	0.314226	0.382434	0.272054	0.207525	0.38617	0.130132
AC010680.3	0.181893	-0.00233838	0.0810585	-0.110038	-0.0680873	0.0907442	0.214238	0.0909487	-0.231248	0.195244	0.268188	-0.340861	-0.214523	-0.288567	0.0484454	0.391071	-0.0235538	-0.363209	-0.121553	-0.122915	-0.0377335	0.117119	-0.0530559	0.461317	0.28081	-0.111894	0.584542	-0.143268
AC010680.4	0.11006	-0.0468755	0.061006	-0.0468755	0.062588	0.227324	-0.122695	-0.166812	-0.293101	0.0575487	0.0490079	-0.0330514	-0.254745	-0.106439	-0.044528	0.183563	-0.00597878	-0.0332827	-0.0308681	0.188133	0.252259	0.795176	0.497173	0.286033	0.0854011	0.504601	0.534859	0.160389
AC010680.5	-0.0605607	-0.0605607	-0.0605607	-0.0605607	-0.0605607	0	0	0	0	0.104732	0.144642	0	0.0529936	0.0793422	0.218663	0.0508576	-0.136576	-0.136576	-0.136576	0	0	0	0.357551	0	0	0	0	0
AC010719.1	0	0	0	0	0	-0.0453296	-0.0687726	-0.0687726	-0.0687726	-0.0687726	-0.0687726	-0.0687726	-0.0452466	-0.00716533	0	0	0	0	0	-0.0336648	0.0216675	0.134161	0.00603241	0.0145626	-0.0336648	-0.0336648	0.0694173	0.0463507
AC010722.1	0	0	0	0	0	0	0	0	0	0	0	0	0	0.0529243	0	0	0.000136762	0	0	0	0	0	0	0	0	0	0.0374853	0
AC010723.1	0	0	0	0	0	0.0990795	0	0	0	0	0	0	0.0357784	0	-0.00406851	-0.00617793	-0.00617793	0.122169	-0.00617793	0	0	0	0	0	0	0	0	0
AC010729.1	-0.0367838	-0.0367838	-0.0117511	-0.0367838	-0.0367838	-0.135639	-0.247807	-0.23499	-0.235587	-0.237449	-0.247807	-0.247807	-0.237862	-0.232076	0	0.0328505	0	0	0.0320571	-0.0241632	0.00690903	0.0107677	0.00830571	0.0236369	-0.00234699	-0.0241632	-0.0241632	-0.0241632
AC010731.2	0	0	0	0	0	0	0	0	0	0	0	0	0	0	-0.667081	-0.174692	0.341136	-0.496461	-0.323922	0	0	0	0	0	0	0	0	0
AC010731.3	0	0	0	0	0	0	0	0.053442	0	0	0	0	0	0	0	0	0	0	0	0	0	0	0	0	0	0	0	0
AC010735.2	0.418696	0.265622	0.287497	-0.371173	-0.0223336	0.879188	0.834429	0.741079	1.091	0.559039	0.64139	0.293099	-0.921228	-1.44206	0.141542	-0.208171	-0.4617	-0.332223	-0.587474	0.37908	0.530991	0.494628	0.203089	0.20382	-0.045434	-0.147889	-0.683239	-0.27227
AC010737.1	0	0.0182349	0	0	0	0	0	0	0.0509537	0	0	0	0	0	0.0147063	0.146986	-0.000293666	0.0732409	-0.000145061	-0.000273725	-0.000273725	-0.000273725	-0.000273725	-0.000273725	-0.000273725	-0.000273725	-0.000273725	-0.000273725
AC010745.1	0	0	0	0	0	0	0	0	0	0	0	0	0	0	0	0	0	0	0	0	0	0	0	0	0	0	0	0
AC010745.2	0	0	0	0	0	0	0	0	0	0	0	0	0	0	0	0	0	0	0	0	0	0	0	0	0	0	0	0
AC010745.3	0	0	0	0	0	0	0	0	0	0	0	0	0	0	0	0	0	0	0	0	0	0	0	0	0	0	0	0
AC010745.4	0	0	0	0	0	0	0	0	0	0	0	0	0	0	0	0	0	0	0	0	0	0	0	0	0	0	0	0
AC010745.5	0	0	0	0	0	0	0	0	0	0	0	0	0	0	0	0	0	0	0	0	0	0	0	0	0	0	0	0
AC010746.1	0	0	0.0737595	0	0	-0.0717382	-0.0717382	0.00380653	-0.0717382	-0.0210969	-0.0717382	-0.0717382	-0.0168966	-0.0382422	0	0	0	0	0	0	0	0	0	0	0	0	0	0
AC010754.1	0	0	0	0	0.022268	0	0	0.0197634	0	0	0	0.0250062	0.540086	0.469812	0	0.100008	0	0	0	0.0348161	0.0353931	0	0	0.031471	0	0	0	0
AC010760.1	0	0	0	0	0	0	0	0	0	0	0	0	0	0	0	0	0	0	0	0	0	0	0	0	0	0	0	0
AC010761.1	0.0547445	-0.130554	0.0945566	0.0381058	0.0365355	-0.0776521	0.129267	0.0051497	-0.00474937	-0.010299	0.0179482	0.064815	-0.084513	-0.0363976	-0.802512	-0.953787	-0.318379	-0.968553	-0.511108	-0.218338	-0.17006	-0.299732	-0.330077	-0.210435	-0.472361	-0.334056	-0.481569	-0.369793
AC010761.2	0	0	0	0	0.0958673	0.161226	0	0	0	0.0627528	0	0	0	0	-0.000870707	0.00140078	-0.00112041	0.00161856	0.328903	-0.116769	-0.116762	0.0315612	-0.116769	-0.116771	-0.116774	-0.116772	-0.116774	0.0642596
AC010761.3	0	0	0.022899	0	0	0	0	0	0	0	0	0	0	0	-0.178057	0.203784	0.280514	-0.295376	0.344288	0	0	0	0	0	0	0	0	0
AC010761.4	0	0	0	0	0	0	0	0	0	0	0	0	0	0	0.503481	-0.00187552	0.299766	0.294714	0.694314	0	0	0	0	0	0	0	0	0.0721359
AC010761.5	-0.143969	-0.143969	-0.143969	-0.143969	-0.143969	0	0	0	0.230972	0	0.136378	0	0	0	9.05e-06	1.48e-05	8.61e-06	1.65e-05	0.304199	0	0	0	0	0	0	0	0	0
AC010761.6	-0.542204	-0.158711	-0.542204	-0.542204	-0.204038	-0.337278	0.369045	0.0960097	0.0802417	-0.122075	-0.0788537	-0.337278	0.0795022	-0.337278	0	0	0	0.507176	0.504151	0.336456	0	0	0	0	0	0	0	0
AC010768.1	0	0	0	0	0	0	0	0	0	0	0	0	0.0425145	0	0	0	0.000158678	5.61e-05	0.136553	0	0	0	0	0	0	0	0	0
AC010768.2	0	0	0	1.77931e-05	0	0	0	0.053303	0	0.0370061	0	0	0	0.0281606	-0.173661	-0.0897082	-0.287994	-0.164017	-0.158608	0.0417466	0	0	0	0	0	0	0	0.0604456
AC010768.4	0	0.0570593	0	0	0	0	0	0	0	0	0	0	0	0	0	0	0	0	0	0	0	0	0	0	0	0	0	0
AC010776.1	-0.0557052	-0.0557052	-0.0557052	-0.0557052	-0.0557052	0	0	0	0	0	0	0	0	0.0557977	0.341277	0.106078	0.328113	0.203002	0.204662	0	0	0	0	0	0	0	0.0725881	0
AC010776.2	0.408311	0.126935	0.103482	0.17436	0.0453321	0.181213	0.264045	0.272766	0.21936	0.312822	0.28037	0.135107	0.0582924	-0.0658333	-0.701345	-0.250263	-0.461552	-0.193843	-0.612876	0.338103	0.337116	0.134937	0.324702	-0.082612	0.0988131	0.17724	-0.273893	-0.134724
AC010776.3	-0.0454233	-0.110478	-0.201348	0.250189	-0.201348	0.487904	0.583659	0.47967	0.18596	0.30188	0.344399	0.65217	0.0223849	0.00617425	-0.332612	0.423205	0.32263	0.299488	0.639555	0.44291	-0.183874	-0.149165	-0.228956	-0.149777	0.176454	0.479068	0.0852571	-0.246126
AC010789.1	0	0	0	0	0	0	0	0	0	0	0	0	0	0	0	0	0	0	0	0	0	0	0	0	0	0	0	0
AC010809.1	0.227511	0.0181359	0.161027	0.0652628	-0.144334	-0.299896	-0.405485	-0.185297	-0.218628	0.0294837	0.0426451	-0.42466	-0.158847	-0.400224	0.27025	0.480742	0.341217	-0.210637	-0.369689	-0.0679962	0.374988	0.207259	0.213423	-0.23508	-0.171859	0.124406	0.0395683	-0.570098
AC010809.2	0.20791	0.226366	0.156152	-0.00483051	-0.201012	-0.136372	-0.210044	-0.167797	-0.142272	-0.10191	-0.10136	-0.157721	-0.223312	-0.121379	0.304751	-0.0956985	0.0575822	0.0685272	-0.217974	0.17781	0.131675	0.124274	0.00221535	0.159943	0.0721086	-0.00723528	-0.224947	-0.233289
AC010809.3	0.17944	0	0.127601	0.0474342	0.079792	-0.0117355	-0.0407346	0.00394443	0.00111759	0.0583498	0.00523552	0.00765603	0.0147299	0.0101411	0.199473	0.195524	0	0	0	-0.0666149	-0.199902	-0.139604	-0.151372	-0.0960259	-0.199902	-0.14712	-0.199902	-0.104416
AC010834.1	0.0845428	0	0.0404783	0.0375033	0	-0.141813	-0.106958	-0.141813	-0.0737348	-0.141813	-0.141813	-0.141813	-0.141813	-0.141813	-0.00356533	-0.0971741	-0.096841	0.0556025	-0.10054	0.0407552	-0.0370185	0.172286	0.0592111	0.00615018	0.170313	-0.0370185	0.188308	0.0508017
AC010834.2	-0.185719	-0.00873886	-0.185719	-0.0682633	-0.0215841	0.167081	0.0400154	0.104503	0.203494	-0.0294815	0.00477915	0.0184749	0.148064	0.428928	-0.345706	-0.463023	-0.482793	-0.383833	-0.263062	0.133703	0.0467375	0.178379	-0.0120815	-0.104822	-0.181351	0.0125466	-0.092967	-0.111027
AC010834.3	0.0357387	0.0147218	0.037036	-0.00812199	-0.0642879	-0.0221119	-0.024286	0.00450623	-0.0260463	-0.0720939	-0.0442963	-0.0192184	3.84656	3.14372	0.323744	0.413913	0.31574	0.426555	0.190016	0.0579053	-0.0319234	-0.0355166	0.108071	0.0811414	0.0359167	0.188987	0.0797217	0.022203
AC010857.1	-0.0845309	-0.0865204	-0.133078	-0.133078	-0.133078	-0.0509608	-0.0509608	0.093282	-0.0509608	-0.0509608	-0.0509608	0.0473726	-0.0509608	-0.0509608	0.492372	0	0.226198	0.117144	0.201156	0.0667736	0.0717517	-0.000413123	0.118708	-0.0672215	-0.0672215	0.130545	0.00826034	-0.0672215
AC010864.1	0.207747	0.0669624	0.140527	0.125361	0.0594819	0.0152479	-0.0281403	-0.0750335	-0.0684892	0.0170786	-0.00404109	0.064416	0.806785	0.646169	-0.00663941	0.202357	-0.202208	0.0942077	0.141641	0.0647827	0.033074	0.0731019	0.262043	0.135156	0.0828497	0.158015	0.296354	0.179028
AC010880.1	0	0	0	0	0	0	0	0	0	0	0	0	0	0	0	0	0	0	0	0	0	0	0	0	0	0	0	0
AC010883.1	0.249617	0.17475	0.0998428	0.173408	-0.0761822	0.0864756	0.036123	0.173115	-0.108378	0.199001	0.253492	-0.181026	0.201599	0.299306	0.0340194	0.0149861	0.904232	0.547165	0.0171333	0.134886	0.232974	0.492738	0.517831	0.905499	0.413772	0.106811	0.944393	0.347628
AC010884.1	-0.0359509	-0.0359509	-0.0359509	-0.0359509	-0.0359509	-0.040643	-0.040643	0.00393827	-0.040643	-0.040643	0.00246411	0.0472255	-0.00870299	-0.040643	-0.0149635	-0.112634	-0.112634	-0.0082976	-0.112634	0	0	0	0	0	0	0	0	0
AC010889.1	0	0	0	0	0	0	0	0	0	0	0	0	0	0	0	0.0196017	0	0	0	0	0	0	0	0	0	0	0	0
AC010890.1	-0.0108958	0.240724	0.493211	0.320439	0.320644	-0.363841	0.0418617	-0.106694	0.28602	0.478127	0.548628	0.478628	1.17719	0.430925	0.412895	0.741022	0.592919	0.698576	0.597239	0.040617	0.0987091	0.380057	0.140314	0.0264029	0.411482	0.0313896	0.27915	0.638804
AC010891.1	0	0	0	0	0	0	0	0	0	0	0	0	0	0	0	0	0	0	0	0	0	0	0	0	0	0	0	0
AC010894.2	0.0992692	0.0138121	0.157875	0.0296668	0.120242	-0.176984	0.218259	0.365548	0.286175	-0.160227	0.0345124	0.579563	0.567778	0.356962	0.381596	0.350594	0.210798	0.394186	0.499349	-0.329159	-0.396243	-0.384655	-0.717445	-0.397782	0.10682	-0.0664206	-0.0441026	0.349194
AC010894.3	0.0408492	0.00241144	0.000600883	0.00598825	-0.0257788	-0.0271567	-0.00267565	-0.0179802	-0.00640152	-0.0125857	-0.0194797	-0.0191361	0.00745727	0.0177038	-0.0391067	0.0120685	0.135302	0.0481693	-0.0438677	-0.0230136	-0.0555901	-0.0308494	0.0298623	-0.0185289	-0.0241747	-0.0124449	0.113797	-0.024793
AC010894.4	0	0	0	0.0675901	0	0	0	0	0	0	0	0	0	0.032957	-7.92e-05	4.61e-05	-7.92e-05	-7.92e-05	-7.92e-05	0	0	0	0	0	0	0	0	0
AC010904.2	0	0	0	0	0	0	0.0792865	0	0	0.0319708	0	0	0	0	0.10345	0	0	0	0.101974	0	0	0	0	0.107059	0	0.0473147	0	0
AC010907.1	0	0	0	0	0	0	0	0	0	0	0	0	0	0	0	0	0	0	0	0	0	0	0	0	0	0	0	0
AC010907.2	0.0410676	-0.0387671	-0.0387671	-0.0386585	0.000138425	-0.365564	-0.391544	-0.391544	-0.316908	-0.360457	-0.391544	-0.391544	-0.391544	-0.391544	-0.0207089	-0.150171	-0.150827	-0.0513404	-0.0585166	-0.0336638	0.0943727	-0.0734911	-0.070557	-0.0702112	0.0517013	0.00762824	-0.073279	-0.0735365
AC010931.2	0.00843643	0	0.00783636	0.000136358	0	0.0144106	0	0	0	0	0	0	0	0	-0.00215634	0.00923358	-0.00987219	0.032366	0.0300801	0.00958511	-1.73e-05	-1.73e-05	3.02e-05	-1.73e-05	-1.73e-05	0.00983415	0.0109629	0.0106193
AC010931.3	0	0	0	0	0	0	0	0	0	0	0	0	0	0	0	0	0.130157	0	0	0	0	0	0	0	0	0	0	0
AC010967.1	0.133969	0	0	0	0	-0.0340995	0.420574	-0.0777977	-0.00795251	-0.0246781	-0.0777977	0.093862	0.0225453	0.00320133	0.0327377	0.0517652	0.0231406	-0.139657	0.29259	0	0	0.0889477	0	0.249677	0	0.160053	0	0.0895755
AC010967.2	0	0	0	0	0	0	0	0	0	0	0	0	0	0	0	0	0	0	0	0	0	0	0	0	0	0	0	0
AC010969.1	0	0	0	0.00802203	0	0	0.0464794	0.00897531	0	0	0	0	0.00626391	0.0255403	0.048912	0.0742397	0.000231622	0.0235674	0.000171512	0	0	0	0	0.0101579	0	0	0	0
AC010969.2	0.228481	-0.0479334	-0.0451284	-0.0407799	-0.139234	0.0582465	0.141	0.0706299	0.0291884	0.0993706	0.0781889	-0.175084	0.0932236	-0.0440949	-0.189513	-0.243021	-0.0977775	-0.238115	-0.0684986	0.0730838	0.188935	0.0679345	0.194096	0.10869	0.237402	0.287975	0.122818	0.0791227
AC010973.1	0.0678489	0	0.122543	0	0.0571203	-0.0785398	0.0461199	-0.0042133	0.64158	-0.0743767	-0.119287	-0.119287	-0.0374168	-0.0503139	-0.346585	-0.181392	-0.193549	-0.346593	0.126263	-0.163072	-0.163072	-0.0100771	0.0064358	-0.0204478	-0.163072	-0.042157	0.399025	-0.163072
AC010973.2	-0.0759923	-0.248126	-0.163452	-0.0781728	-0.103756	-0.136893	-0.0185641	-0.0981714	-0.132501	-0.0807927	-0.0802809	-0.0621299	-0.1013	-0.169357	-0.283256	-0.155176	-0.009992	-0.417779	-0.271079	0.0182338	0.122206	-0.0852339	-0.000312817	0.055537	-0.204106	-0.125878	0.102139	-0.169114
AC010974.1	0	0	0	0	0.0973366	-0.0976492	-0.0976492	-0.0976492	0.0827148	-0.0976492	0.106207	-0.0976492	-0.0976492	-0.0976492	-0.245688	-0.245688	-0.0130365	-0.245688	-0.245688	0	0.147162	0	0	0	0	0	0	0
AC010975.1	0	0	0	0	0	0	0	0	0	0	0	0	0	0	0	0	0	0	0	0	0	0	0	0	0	0	0	0
AC010976.1	0.0749194	0.176885	-0.0275879	-0.0286815	-0.0286812	0.0461073	0.0265149	0.0357456	0.357332	0.160177	0.0367908	0	0	0.0362512	-0.0630927	-0.541577	-0.738053	-0.913922	-0.337887	0.0385212	-0.00571045	-0.0540561	0.0492502	0.0267321	-0.0540561	-0.00712421	0.228502	-0.0540561
AC010976.2	-0.101167	-0.207059	-0.122864	-0.0691066	0.024142	0	0.309554	0.162286	0.0234701	0.30674	0.329462	0.464521	0.67378	0.711448	0.198454	0.108692	0.0702011	-0.0142088	0.0453236	0.196519	0.196064	-0.0383869	-0.0452193	0.00409146	-0.0444922	-0.102757	0.0754945	-0.139402
AC010978.1	-0.0237815	-0.118942	-0.118063	-0.0954819	-0.186294	0.146751	0.0889247	0.0601913	-0.00889646	0.0162024	-0.0285132	-0.131148	-0.0235777	-0.175543	0.0197272	0.33387	0.141338	0.104905	-0.0887994	0.0349039	-0.0121705	0.0855711	0.172119	-0.136829	-0.149891	-0.14389	-0.110989	-0.185558
AC010980.2	0	0.0152194	0	0	0.0147208	0	0	0	0.015548	0	0.0309499	0	0	0	0.0391115	0	0	0	0	0	0	0	0	0	0	0	0	0
AC010982.1	0	0	0	0	0	0	0	0	0	0	0	0	0	0	0	0	0	0	0	0	0	0	0	0	0	0	0	0
AC010983.1	0	0	0	0	0	0.015542	0	0	0	0.0193566	0	0	0	0	0	0	0.0659044	0.0621368	0	0	0	0	0	0	0	0	0	0
AC010997.2	0	0	0	0	0	0	0	0	0	0	0	0	0	0	0	0	0	0	0	0	0	0	0	0	0	0.208224	0	0
AC010997.3	0.13525	0.143001	0.420823	0.183593	0.240342	0.0525206	0.047494	-0.00210525	-0.0164841	-0.022487	-0.0661507	0.401404	0.0779011	0.0382128	0.138613	-3.15e-05	0.153418	0.140746	0.287602	0.219779	0.178957	0.311075	0.155484	0.163073	0.155364	0.141421	0.43661	0.119288
AC010997.4	0.0447987	0.0549941	0.0127797	0.0353946	0.0337569	0.0924607	0.0211068	0.0453002	0.124639	0.0188199	0.055243	0.0127942	0.274552	0.388769	0.0909364	0.0956264	0.130477	0.0626825	0.121546	0.0458706	-0.0136957	0.00808095	0.00224599	-0.00201971	0.0278245	0.0231452	0.0613612	0.0614898
AC010997.5	0	0	0	0	0.114226	-0.171493	-0.21214	-0.312322	-0.312322	-0.312322	-0.312322	-0.188932	-0.166735	-0.263383	-0.268083	-0.268083	-0.268083	-0.268083	0.175645	0	0	0.236052	0	0	0	0.128537	0.248606	0.111708
AC010998.1	0	0	0	0	0	0	0	0	0	0	0	0	0	0	0	0	0	0	0	0	0	0	0	0	0	0	0	0
AC010998.2	0	0	0	0.0415804	0	0	0	0.196701	0	0	0	0	0.0330654	0	0.48055	0.3417	0.268973	0.220668	0.447524	-0.145447	-0.198756	-0.198756	-0.198756	-0.198756	-0.198756	-0.198756	-0.198756	-0.198755
AC010998.3	0	0	0	0	0	0	0	0	0	0	0	0	0	0	0	0	0	0	0	0	0	0	0	0	0	0	0	0
AC010999.2	-0.0567444	0.0724522	0.150183	-0.151388	0.0939234	-0.0434528	-0.132638	0.00567735	-0.182243	-0.0117845	-0.0814146	0.00983413	-0.0548055	-0.0707742	-0.405979	-0.424422	-0.276595	-0.523637	-0.20583	0.0690303	0.187825	-0.0681747	0.247055	-0.0219153	0.211846	0.0232407	-0.0548239	0.0146696
AC011005.1	-0.0482191	-0.0124804	0.00787232	0.0188137	-0.013613	0.0228141	0.0938806	0.0185873	0	0.1286	0.0340897	0	0.0142333	0.0606988	0.155143	-0.0286883	0.0285993	0.0229917	-0.0308295	-6.74e-05	0.0451136	4.43e-05	0.000150426	7.32e-05	0.032552	-1.77e-05	0.000647663	-4.48e-05
AC011005.4	0	0	0	0.0558162	0	0	0	0	0	0	0	0	0	0	-0.0794363	-0.312472	-0.585601	-0.455715	-0.458813	0	0	0	0	0	0	0	0	0
AC011008.1	-0.0783821	-0.0783821	-0.0783821	-0.0783821	-0.0783821	0.1347	0.0698397	0	0.0616346	0.0556555	0	0.190871	0.110884	0.0754038	0.16062	0	0	0	0	-0.0566584	-0.118097	-0.118097	0.0666643	-0.0170258	-0.118097	-0.118097	-0.0183973	0.0279686
AC011043.1	0.267976	-0.128054	-0.026455	-0.637908	-0.567624	-0.356941	-0.414025	-0.674338	-0.696333	-0.70246	-0.737594	-1.92975	-1.63594	-1.66333	-1.08258	-0.886121	-0.926353	-1.1045	-1.03204	-0.225815	-0.236808	-0.506181	-0.461337	-0.574752	-0.768909	-0.82371	-1.22265	-0.87396
AC011043.2	-0.0303461	-0.0407888	-0.00118428	-0.0539528	-0.0252244	-0.0142616	-0.059782	-0.127943	-0.100931	-0.0790326	-0.111613	-0.106349	-0.115047	-0.120249	-0.0836261	-0.0876556	-0.0854885	-0.094762	-0.0867153	0.0083253	-0.0124036	-0.0993449	-0.0320078	-0.0932354	-0.0991321	-0.0912031	-0.157586	-0.156367
AC011092.2	0.0495482	0.056881	-0.0494477	-0.0494477	-0.0494477	-0.102925	-0.0916678	-0.0851829	-0.00335856	-0.0620045	-0.00513189	-0.135976	0.0800698	-0.0693405	0.302345	0.10494	0.250667	0.115711	0.236812	-0.0736113	-0.113527	-0.0518599	-0.0472164	-0.0471749	-0.113527	-0.113527	-0.0484896	-0.0631234
AC011120.1	0.269257	0.0461976	-0.0344725	0.160517	0.0823499	-0.263577	-0.281632	-0.12408	0.0846822	-0.0137675	-0.00232847	-0.110966	-0.109759	-0.0428475	0.0149937	0.767335	0.23922	-0.328876	-0.171345	0.287359	0.155707	0.325881	0.191885	0.137824	0.34718	0.205672	0.18303	0.0237443
AC011124.1	0	0	0	0	0	0	0	0	0	0	0	0	0	0	0	0	0.0364635	0	0	0	0	0	0	0	0	0	0	0
AC011124.2	0	8.36761e-06	0.000650667	0	0	0	0	0	0	0	0	0	0	0.00330124	0	0.0798035	1.7e-05	0	0.000655249	0	0	0	0.00349805	0	0	0	0	0
AC011131.1	0	0	0	0	0	0	0	0	0	0	0	0	0	0	0	0	0	0	0	0	0	0	0	0	0	0	0	0
AC011139.1	0	0	0	0	0	0	0	0	0	0	0	0	0	0	-0.178464	-0.178464	-0.178464	-0.178464	-0.0426953	0	0	0	0	0	0	0	0	0
AC011193.1	0	0	0	0	0	0	0	0	0	0	0	0	0	0	0	0	0	0	0	0	0	0	0	0	0	0	0	0
AC011195.2	0	0	1.63024e-05	0	0	0	0	0	0	0	0	0	0	0	-0.000100892	-0.000100892	-3.68e-05	-2.37e-05	-0.000100892	2.75e-05	0	0	0.0279664	0	0	0	1.39e-05	0
AC011196.1	0	0	0	0	0	0	0	0	0	0	0	0	0	0	0	0	0	0	0	0	0	0	0	0	0	0	0	0
AC011228.1	0	0	0	0	0	0	0	0	0	0	0	0	0	0.0193858	0	0	0	0	0	0	0	0	0	0	0	0	0	0
AC011239.1	0.0552512	0	0.148883	0.0459604	0.0484701	0.0332189	0	0.101603	0.0938084	0.0387201	0	0	0	0.0233598	0.0115947	-0.0984874	0.0314365	0.138505	0.125221	0.145689	0.0288302	0.0694506	0.232581	-0.0473848	-0.0473848	0.0106889	-0.0473848	0.0717239
AC011243.1	0	0	0	0	0	0	0	0	0	0	0	0	0	0	0	0	0	0	0	0	0	0	0	0	0	0	0	0
AC011247.1	0.143666	0.1022	-0.0493579	-0.0103129	0.150243	-0.334853	0.0556038	-0.188289	0.00733633	-0.127684	-0.108816	-0.0133704	0.0102198	0.0911931	-0.316005	-0.0308517	-0.0927002	-0.106927	-0.259052	-0.294388	-0.378619	-0.401109	-0.170797	-0.205718	-0.110074	0.240548	0.220062	-0.0852075
AC011247.2	-0.249316	-0.249316	-0.249316	-0.249316	-0.00136407	0.279711	0	0.198859	0.370025	0	0.444308	0.765877	0	0	-0.3551	-0.937326	-0.961547	-0.591044	-0.586749	-0.335288	-0.335288	-0.335288	-0.335288	-0.335288	-0.335288	-0.335288	-0.335288	-0.335288
AC011257.1	0	0	0	0	0	0	0	0	0	0	0	0	0	0.0831235	0	0	0	0	0	0	0	0	0	0	0	0	0	0
AC011284.1	0	0	0	0	0	0	0	0	0	0	0	0	0	0	-0.232329	-0.0932047	-0.150086	-0.017959	-0.0201841	0	0	0	0	0	0	0	0	0
AC011287.1	0.130051	0.00832747	0.0493752	0.075445	-0.0171958	-0.153788	-0.0519162	-0.0637275	-0.0748827	-0.110944	-0.0551423	-0.0894458	-0.120329	0.0759129	0.155671	0.0383219	-0.0847007	-0.29538	-0.297567	-0.0420106	0.136031	0.10066	0.0148334	-0.105462	-0.0957018	-0.177235	-0.0976805	-0.14503
AC011287.2	0.065615	0.0286774	0.0295258	0.0275868	0.0277952	0	0	0	0	0.0244864	0.0319064	0	0.0203294	0.0146542	0.0763013	0.0664507	0.32169	0.0884602	0.213579	0.0247264	0	0	0	0.109527	0.0504577	0.0371838	0	0.0672427
AC011290.1	-0.0495339	-0.220568	-0.134931	-0.220568	-0.220568	-0.0910286	0.185354	0.219359	-0.0910286	0.0875006	-0.0178405	-0.0910286	0.0082939	0.172211	-0.161537	0.00207881	-0.161537	0.0207446	0.19527	0	0	0.113897	0	0.295794	0	0	0.328679	0.190547
AC011294.1	-0.0231094	-0.0218859	0.0831727	-0.00145281	0.0235468	0.00221719	0.0252132	0.074681	-0.0123289	0.1031	0.136856	0.0252217	0.17768	0.147716	-0.000817662	0.247148	0.018511	0.126735	0.00698316	0.199241	0.00505756	-0.079903	0.0989807	0.173255	0.153948	0.0950773	0.307045	0.0469919
AC011298.1	0	0	0	0	0	0	0	0	0	0	0	0	0	0	0	0	0	0	0	0	0	0	0	0	0	0	0	0
AC011306.1	0	0	0	0	0	0	0	0	0	0.0146601	0	0	0.0276447	0	0.0957893	0.0461409	0.000221883	0.0467281	6.84e-05	2.58e-05	0	0	0	0	0.0309765	0.0227235	0	0
AC011313.1	-0.178293	-0.454488	-0.17169	-0.652246	-0.655889	0.245739	-0.111972	-0.104179	-0.212843	0.196409	0.237689	0.148118	0.281388	0.0892391	-0.000980054	-0.0482927	0.289804	0.060459	0.317071	0.0886499	0.370886	-0.10111	-0.0499064	-0.081886	-0.354709	-0.285536	-0.110665	-0.385213
AC011330.3	0	0.0153598	0	0	0	0	0	0.0115279	0	0	0	0.0118791	0	0.0558123	0.00585213	0.0167175	0.0466641	0	0.0161575	0	0.0029684	0	0	0	0.0116984	0	0.020456	0
AC011337.1	0.0656705	-0.0534519	0.0278737	0.0346728	-0.0204545	-0.0743962	-0.0333053	-0.0770137	-0.000553843	-0.0282709	-0.0301676	-0.136435	-0.080051	-0.0560685	-0.0769016	-0.138956	-0.0157655	-0.133379	-0.0587654	-0.0371606	0.0203726	0.0598123	0.0927192	0.0994764	-0.0155784	0.119171	0.0769577	0.0749775
AC011352.1	0	0.0324479	0	0	0	0	0	0.0285286	0	0	0	0	0.0726179	0.211476	0	0	0	0	0	0.0519255	0	0	0	0	0	0	0	0
AC011352.3	0	0	0	0	0	0	0	0	0	0	0	0	0	0.0228862	0	0	0	0.206089	0	0	0	0	0	0	0	0	0	0
AC011362.1	0	0	0	0	0	0	0	0	0	0	0	0	0	0	0	0	0	0	0	0	0	0	0	0	0	0	0	0
AC011363.1	0	0	0	0	0	0	0	0	0	0	0	0	0	0	0	0	0	0	0	0	0	0	0	0	0	0	0	0
AC011365.1	0.00199258	0.0251245	0.00541073	0.022807	0.00114924	-0.00551273	-0.000179808	0.0067237	0.00499491	0.0382861	0.0405504	0.002938	0.0144969	0.0369649	-0.062437	-0.0533058	0.0689343	-0.0676629	-0.0514338	0.000575662	-0.0116581	-0.000248679	-0.00770256	-0.00423062	-0.0215634	-0.0048769	0.00542408	0.0174676
AC011365.2	0	0	0	0	0	0	0	0	0	0	0	0	0	0	0	0.00581877	0.086717	0	0	0	0	0	0	0	0	0	0	0
AC011369.1	0	0	0	0	0	0	0	0	0	0	0	0	0	0	0	0.026349	0	0.0264244	0	0	0	0.000347357	0	0	0	0.000446204	0	0.0120484
AC011373.1	0	0	0	0	0	0	0	0	0	0	0	0	0	0	0	0	0	0	0	0	0	0	0	0	0	0	0	0
AC011374.1	0	0	0	0	0	0	0	0	0	0	0	0	0	0.0083238	0.114935	0.0116757	0.0995247	0.0874646	-0.0188564	0	0	0	0	0	0	0	0	0
AC011374.2	0.0939073	-0.240148	-0.186139	-0.266714	-0.35634	0.130128	0.46824	0.105225	0.384596	0.336026	0.393125	1.00525	1.20511	0.989293	0.424077	0.160391	0.156133	0.435143	1.14302	-0.323706	-0.492892	-0.341048	-0.201311	-0.686932	-0.648947	-0.017569	-0.124764	-0.312986
AC011377.1	0	0	0	0	0	0	0	0	0	0	0	0	0	0	0	0	0	0	0	0	0	0	0	0	0	0	0	0
AC011383.1	-0.0386523	-0.0386523	-0.0386523	-0.0386523	-0.0386523	0	0	0	0	0	0	0	0	0	0	0	0	0	0	0	0	0	0	0	0	0	0	0
AC011389.1	0	0	0	0	0	0	0	0	0	0	0	0	0	0.0278296	0	0	0	0	0	0	0	0	0	0	0	0	0	0
AC011389.2	0	0	0	0	0	0	0	0	0	0	0	0	0	0	0	0	0	0	0	0	0	0	0	0	0	0	0	0
AC011396.1	0	0	0	0	0	0	0	0	0	0	0	0	0	0	0	0	0	0	0	0	0	0	0	0	0	0	0	0
AC011396.2	0	0	0.000894972	0	0	0	0	0	0	0	0	0	0	0	0	0	0.00156743	0	0	0.000451106	0	0	0	0	0	0	0	0
AC011405.1	0.035394	0.0684826	-0.00465518	-0.00403469	-0.00468644	-0.0338609	-0.00127089	0.00344632	-0.0338609	-0.0338609	-0.0338609	-0.0338609	-0.0338609	-0.0082695	0.688608	0.267698	0.52572	0.237997	0.0957403	1.44e-07	0.102858	0	0.108014	0.000143754	0.113625	0.000338767	0.0575223	0.0638527
AC011410.1	0	0	0	0	0	0	0	0	0	0	0	0	0	0	0	0	0	0	0	0	0	0	0	0	0	0	0	0
AC011416.3	-0.0470539	-0.0575184	-0.0270463	-0.00740802	-0.0216453	-0.0470075	-0.00198173	-0.0198925	-0.0199771	-0.0335099	-0.009004	-0.00967012	-0.0451491	-0.00876947	0.00589164	-0.0220686	-0.0807757	-0.0542828	-0.0227811	-0.108621	-0.122106	-0.124926	-0.111493	-0.126618	-0.137863	-0.0895988	-0.137863	-0.123187
AC011442.1	0	0	0	0	0	0	0	0	0	0	0	0	0	0	-0.463632	-0.656923	-0.385259	-0.634129	-0.850013	0	0	0	0	0	0	0	0	0
AC011443.1	0	0	0	0	0	0	0	0	0	0	0	0	0	0	0	0	0	0	0	0	0	0	0	0	0	0	0	0
AC011444.1	0.0443297	0.0888072	-0.133972	0.100874	-0.178409	0.0646401	-0.343471	-0.279819	-0.226728	-0.131195	-0.191523	-0.291266	-0.224073	-0.156717	0.00898358	0.343373	0.037496	-0.0115682	-0.135566	0.101612	0.33723	0.086393	0.225899	0.0360939	-0.0951571	0.126926	0.130733	-0.0756287
AC011444.2	0	0	0	0	0	0	0	0	0	0	0	0	0	0.0547631	0	0	0	0	0	0	0	0	0	0	0	0	0	0
AC011444.3	0	0	0	0	0	0	0	0	0	0	0	0	0	0.0809105	0	0	0	0	0.251581	0	0	0	0	0	0	0	0	0
AC011445.2	-0.562617	-0.234831	-0.0294031	-0.609089	0.143149	-0.450745	-0.395621	0.337255	-0.994801	-1.43226	-1.28296	-0.720775	-0.753909	-1.19062	-0.900973	0.478972	0.0826808	1.12266	0.281498	-0.463616	-0.252622	-0.161055	0.899518	0.10979	-0.0963137	0.00337803	-1.49438	-0.0917974
AC011446.1	0.160536	-0.157891	-0.231427	-0.159335	-0.0904029	-0.137076	-0.0718691	-0.000379772	0.0604993	-0.0830738	-0.00358055	0.217951	-0.0832577	-0.137076	-0.889574	-0.450866	-0.287167	-0.139525	-0.250804	-0.110184	-0.110184	-0.110184	-0.110184	-0.110184	0.14762	-0.110184	-0.110184	-0.110184
AC011446.2	0.280059	0.135121	0.0461094	0.0120185	0.175165	-0.245174	0.0212841	-0.280045	-0.00730787	-0.345932	-0.402891	-0.430686	-0.343619	-0.436317	0.0343685	-0.13948	-0.137236	-0.133849	0.28627	0.103396	-0.00612538	0.0150424	0.0861558	-0.0210367	-0.107302	-0.0661156	-0.107302	-0.107302
AC011447.3	0.167185	-0.0891106	-0.142172	-0.248991	-0.632158	-0.346111	-0.225409	-0.177928	-0.405552	-0.386829	-0.348808	-0.33533	-0.32899	-0.487192	-0.424502	-0.107275	-0.744612	-0.551375	-0.500748	0.380931	0.110124	-0.155574	-0.272297	-0.248853	-0.721698	-0.582451	-0.78196	-0.785055
AC011448.1	-0.253612	-0.349641	-0.302595	-0.402709	-0.140001	0.477656	0.0306403	0.38931	0.393947	0.247693	0.227484	0.415542	-0.118744	-0.220162	0.0801681	-0.106112	0.203602	-0.530529	-0.4465	-0.258892	0.00914806	0.141052	-0.0665717	0.336633	0.480978	0.287923	0.463678	0.253737
AC011450.1	0.821568	0.444873	0.522847	0.880094	0.591794	0.236668	-0.17348	0.0911446	0.0183374	-0.137897	-0.108114	-0.215822	-0.357477	-0.429366	-1.03604	-0.768986	-0.680882	-1.02081	-0.909975	0.647784	0.147664	0.514216	0.529419	0.505493	0.419375	0.331845	-0.0645558	0.367735
AC011451.1	0.0996081	-1.70237e-05	0.00108275	-1.70237e-05	0.0876042	0	0.0797804	0	0.070525	0	0.0920621	0	0	0	-0.212873	-1.00378	-0.124904	-0.787265	-1.02603	0.227475	0.130137	2.35e-05	0	0	0	0.103886	0.11348	0
AC011452.1	0.00243269	0.00508321	0.00078157	0.00197965	0.113219	0.470332	0	0	0	0	0	0	0.0328859	0	-0.274957	-0.124307	-0.278889	-0.262505	-0.230342	-0.00511514	0.000424891	-0.00938087	-0.00550469	-8.69e-05	0.00234601	-0.00935455	0.0253306	0.00196658
AC011453.1	0.0133246	6.52557e-05	-1.52925e-05	0.0102413	-1.52925e-05	0	0	0	0	0.00750146	0	0	0.0134675	0.00564932	0.0181033	0.12237	0.0900654	0.0245899	0.080222	2.91e-05	0.0197223	-8.43e-05	-8.43e-05	-1.95e-05	-8.43e-05	0.00443512	-6.22e-05	-5.99e-05
AC011455.1	0	3.90489e-06	0	3.10657e-05	0.0609199	0	0	0	0	0	0	0	0	0	0.149585	0.000134829	6.71e-06	0.234315	0.0157628	0	0	1.94e-06	4.72e-05	0	2.18e-06	0.139557	0	6.42e-07
AC011455.2	0.260936	-0.143482	-0.0123575	0.110121	-0.0251989	0.426057	0.111189	0.0426314	0.0947855	0.29879	0.283747	0.130407	0.455637	0.188449	-0.382372	-0.304353	-0.562811	-0.46047	-0.279071	-0.311135	0.189009	0.0268709	-0.073041	-0.0248458	-0.111857	-0.308181	0.0929987	-0.199967
AC011456.1	0	0	0	0	0	0	0	0	0	0	0	0	0	0	0	0	0	0	0	0	0	0	0	0	0	0	0	0
AC011462.1	0.235684	0.282298	0.127038	0.0826672	0.12872	-0.0368012	-0.0299557	-0.210108	0.235999	0.496372	0.453564	0.0490009	0.0880481	-0.133787	0.192253	0.243319	-0.221994	0.0841522	0.131703	0.159962	0.246942	-0.0381817	0.534035	0.0208947	0.738852	0.490055	0.767261	-0.145439
AC011462.2	0	0	0	0	0	0	0	0	0	0	0	0	0	0	0.000764801	0.000168044	0.000334353	0	0	0	0	0	0	0	0	0	0	0
AC011465.1	0	0	0	0	0	0	0	0	0	0	0	0	0	0	0.510229	0	1.29644	0	0	0	0	0	0	0	0	0	0	0
AC011466.1	-0.08823	-0.0141671	-0.0508836	-0.139048	0.144917	-0.13556	-0.158432	0.190126	-0.0157104	0.00560937	0.114589	0.0249802	-0.252381	0.0627711	0.17089	-0.04492	0.20818	0.251701	-0.180214	0.342375	0.41049	-0.0586176	-0.0041911	0.0605467	-0.0748101	0.0305384	-0.288384	-0.179158
AC011466.2	0	0	0	0	0	0	0	0	0	0	0	0	0	0	0	0	0	0	0.234671	0	0	0	0	0	0	0	0	0
AC011466.3	0	0	0	0	0	0	0.0329072	0	0	0	0	0	0	0	-0.14602	-0.169879	-0.00328752	-0.248124	-0.164329	-0.0492339	-0.0492339	-0.0492339	-0.0492339	-0.0492339	-0.0492339	-0.0492339	-0.0492339	-0.0492339
AC011468.3	0	0	0	0	0	0	0	0	0	0	0.106188	0.137454	0	0.140763	0	0.239014	0.000718397	0.2235	0.260971	1.66e-06	0	0	0.132561	0	0.187235	0	0	0
AC011468.5	0.118051	-0.0571229	-0.111769	-0.164816	-0.21731	-0.210283	-0.399025	-0.50115	-0.558034	-0.260664	-0.303243	-0.697877	-0.546878	-0.600099	-0.0585862	-0.0169483	0.0208255	0.126336	0.354875	-0.214927	-0.436215	-0.136683	-0.246447	-0.19838	0.0250982	-0.358416	-0.0770363	-0.0827947
AC011471.2	0	0	0	0	0	0	0	0	0	0	0	0	0	0	0	0	0	0	0	0	0	0	0	0	0	0	0	0
AC011472.1	-0.0264846	0.083783	-0.114175	-0.108714	0.0240405	0.155104	0.212126	0.181701	0.139283	0.0596081	0.087862	0.0562119	0.435513	0.157104	0.320823	0.014265	-0.271478	0.0992238	0.315135	-0.0598307	0.00393945	-0.00696202	-0.0824325	0.0402442	-0.0320134	0.0291123	0.0403854	0.0900016
AC011472.4	0.189764	0.140475	0.018069	0.145854	0.0771884	0.14549	0.190448	0.154377	0.306035	-0.0299811	0.0651962	0.493416	0.517558	0.715024	0.0119287	0.506	0.212445	-0.00799846	0.165599	-0.312682	-0.134725	-0.225152	0.0408435	-0.0775897	0.255244	0.275587	0.140284	-0.137854
AC011473.1	0.0855901	0.0843777	0	0.0845537	0	-0.0742186	-0.0742186	-0.0742186	-0.0134999	-0.0742186	-0.00867614	-0.0742186	-0.0742186	-0.0397103	0.284741	0.149625	0	0	0.162796	0	0	0	0	0	0	0	0	0
AC011473.2	0	0	0	0	0	0	0	0	0	0	0	0	0	0	-1.76689	-1.10295	-0.727941	-1.76686	-0.149731	0	0	0	0	0	0	0	0	0
AC011473.3	0	0	0	0	0	0	0	0	0	0	0	0	0	0	0	0	0	0	0	0	0	0	0	0	0	0	0	0
AC011473.4	0	0	0	0	0	0	0	0	0	0	0	0	0	0	0	0	0	0	0	0	0	0	0	0	0	0	0	0
AC011474.2	0	0	0	0	0	0	0	0	0.0531958	0	0	0	0	0	0	0	0	0	0	0	0	0	0	0	0	0	0	0
AC011474.3	0	0	0	0	0	0	0	0	0	0	0	0	0	0	0	0	0	0	0	0	0	0	0	0	0	0	0	0
AC011476.3	-0.0187581	0.0874585	0.0734741	-0.0145519	-0.00425528	0.106627	-0.151642	0.0151192	-0.0932033	0.0346064	0.0496174	-0.101675	0.147106	-0.0349333	0.532752	0.407134	0.569319	0.305091	0.894017	0.306083	0.146601	0.342674	0.232325	0.368847	0.214426	0.331994	0.41345	0.0188524
AC011477.3	0	0	0	0	0	-0.095314	-0.095314	-0.095314	-0.095314	-0.095314	-0.095314	-0.095314	-0.095314	0.00835622	-0.420495	0.0850355	-0.0618556	-0.513694	-0.718547	0	0	0	0.0968475	0	0	0	0	0
AC011477.4	-0.0788976	-0.0918531	-0.0382735	-0.0923189	-0.0912186	-0.0872371	-0.0872371	-0.0391909	-0.0501339	-0.0872371	-0.000490473	0.111193	6.62084	1.87977	-0.0947332	0.749269	0.223364	0.255155	0.202559	0.0217985	-0.00699654	0.00343323	0.122667	0.0618705	0.0547748	-0.0736752	-0.0729125	0.25289
AC011478.1	0	0	0	0	0	0	0	0	0	0	0	0	0	0	0	0	0	0	0	0	0	0	0	0	0	0	0	0
AC011479.1	0.00118207	0.00114523	0.00205654	-0.00164279	0.000337892	0	0	0	0	0	0.128811	0	0	0	-0.347487	-0.292373	-0.000833853	-0.0659129	-0.223651	0.00292288	0.193385	0.00774406	0.00137197	-0.00157823	0.00323462	-0.00135441	0.388855	4.53e-05
AC011481.1	0.286056	0.310732	0.212829	0.232532	0.0102988	-0.0895609	-0.310437	-0.069468	-0.319816	-0.116724	-0.097696	-0.405758	-0.190783	-0.315202	-0.0666574	-0.459396	0.425055	-0.237913	-0.242867	0.101891	0.544875	0.22426	0.332626	0.420324	0.659337	0.321836	0.669741	0.23295
AC011481.2	0	0	0.0815369	0.161857	0.0827471	0.0548298	0	0	1.8066	0.115162	0	0	0.109805	0.0422765	0.0722783	-0.22759	0.732128	-0.227547	0.093125	0.115794	0.120285	0	0.134133	0.100257	0.162715	0.178553	0.227031	0.0826158
AC011483.1	0	0	0	0	0	0	0	0	0	0	0	0	0	0	0	0	0	0	0	0	0	0	0	0	0	0	0	0
AC011483.2	0	0	0	0	0	0	0	0	0	0	0	0	0	0	0	0	0	0	0	0	0	0	0	0	0	0	0	0
AC011484.1	0.0127031	-0.00900384	-0.00900384	0.000880131	-0.00900384	0	0	0.0537051	0.0105382	0	0	0	0	0.00549663	-0.0126699	-0.0127733	-0.00756415	0.033453	-0.0159822	0.0265619	0	0	0.0606415	0	0.0246585	0.0511751	0.0671673	0.0271096
AC011491.3	0	0	0	0	0.0533269	-0.0499282	-0.0499282	0.00450421	-0.0499282	-0.00889875	0.193414	0.0830352	-0.0116239	-0.0137381	-0.104533	0.0427468	0.032701	0.344128	-0.104533	-0.0993783	-0.0184766	0.145776	-0.0993783	-0.0410736	-0.0993783	-0.0993783	-0.0993783	-0.0993783
AC011495.2	-0.110833	-0.110833	-0.110833	-0.110833	-0.110833	0	0	0	0	0	0	0	0	0	0.000160624	-4.77e-05	-4.77e-05	0.000164521	2.86e-05	0	0.156097	0	0	0	0	0	0	0
AC011495.3	0	0	0	0	0	0	0	0	0	0	0	0	0	0	0	0.0170962	0	0	0.296544	0	0	0	0	0	0	0	0	0
AC011498.1	0.225254	0.112307	0.0391993	0.0583238	-0.181505	-0.420347	-0.185993	0.292437	0.196795	-0.101254	0.261971	0.257858	-0.00693519	0.1871	-0.659109	-0.0343568	0.0455295	-0.756755	0.343111	0.276259	0.198205	0.3222	0.518684	0.74621	1.01058	0.312348	0.554386	0.453001
AC011498.2	0.287733	0.252324	-0.271114	-0.0334996	0.142661	-0.0764573	-0.510895	-0.0987045	-0.438834	-0.322883	-0.446997	-0.510124	-0.561262	-0.561262	-0.0482332	-0.306708	-0.306708	-0.306708	-0.0439206	0.693899	-0.0449461	0.286851	0.188788	0.0106018	0.0628654	-0.198485	-0.0621673	-0.0198129
AC011498.3	0	0	0	0	0	0	0	0	0	0	0	0	0	0	-0.242228	-0.242228	-0.242228	-0.120893	0.00379229	0	0	0	0	0	0	0	0	0
AC011498.4	0	0	0	0.00541853	0.00361862	0.0152119	0.0113612	0	0	0	0	0	0	0.00613506	0.0836319	-0.0363538	0.0320536	-0.0194098	-0.00139355	0.00908858	0.0185045	-0.00119192	0.0175731	0.0104559	0.00739752	-0.00117266	0.0188594	0.0114893
AC011498.6	0.0834044	-0.0759573	0.0818548	-0.0770355	0.120151	-0.0179299	-0.0588028	-0.0588028	-0.0103503	-0.0123498	0.0657471	0.0243819	-0.0588028	-0.0588028	0.137886	-0.308099	0.249821	-0.424417	-0.536728	0.0159073	-0.0901592	0.0350036	-0.314305	-0.189095	-0.0917042	-0.243784	-0.141647	-0.113482
AC011499.1	0.0428337	-0.409101	-0.365553	-0.357122	-0.289515	0.0640871	-1.11744	-0.708411	-1.11744	-1.08161	-1.11744	-1.11744	-1.04862	-1.08306	-0.277374	-0.081102	-0.289481	-0.290222	-0.28858	0.11969	0.226644	0.183419	0.173848	0.0565508	-0.0547715	0.00951993	-0.0511447	0.0115612
AC011500.3	0	0.0468244	0.0449746	0	0	0	0	0.224452	0.199186	0	0	0	0	0.0298644	0	0.124505	0.000738698	0.000975839	0	0	0	0	0	0.0580801	0	0	0.364093	0
AC011503.1	0.0821166	0.272887	0.287433	0.0602463	-0.0367289	0.083737	-0.00383799	-0.000557067	-0.00191635	-0.016022	0.124377	0.0749672	1.18314	0.598788	0	0	0.0796995	0	0.153265	0.0675155	0.101773	0	0.0594594	0.249387	0.0589053	0.152845	0.0364019	0.196786
AC011507.1	0	0	0	0	0	0	0	0	0	0	0	0	0	0	0	0	0	0	0	0	0	0	0	0	0	0	0	0
AC011509.1	0	0	0	0	0	0	0	0	0	0	0	0	0	0	0	0	0	0	0	0	0	0	0	0	0	0	0	0
AC011509.2	0.140644	-0.037815	-0.0808177	-0.0808177	-0.035912	0.0480803	0.0659846	-0.00235673	0.168202	0.0764849	0.0428752	-0.0378255	0.059162	0.0917656	-0.131537	-0.131537	-0.0199786	-0.0241071	0.381398	0.0676712	-0.069033	-0.069033	-0.00853487	0.0411827	-0.069033	0.0753452	-0.00974196	-0.0232085
AC011510.1	0	0	0	0	0	0	0.144713	0	0.130028	0	0	0	0	0	-0.325951	-0.39064	0.0618291	-1.27533	-1.2605	0.17779	0.224082	0	0	0	0	0.306739	0	0
AC011511.1	-0.107976	-0.0916556	-0.0988352	0.138188	0.149538	0.0958949	0.00297938	-0.0338292	-0.0298914	0.207862	0.178514	0.0778964	-0.180902	-0.274058	0.0705589	-0.336641	-0.0455331	-0.0906008	-0.158489	0.106386	0.246045	0.418857	0.335915	0.240708	0.560658	0.175118	0.525926	0.189541
AC011511.2	-0.0618995	-0.0915805	-0.0915805	-0.0624392	-0.0915805	-0.00715728	-0.0250607	0.245633	-0.00372302	-0.0036657	-0.0250607	-0.0250607	-0.0250607	-0.0250607	-0.0746905	0.253573	0.210245	0.12249	0.47044	-0.0566169	-0.0788395	-0.0405294	0.0237706	-0.0788395	0.122474	-0.0788395	-0.0788395	-0.0465818
AC011511.3	0	0	0	0	0	0	0	0	0	0.0766876	0	0	0	0.106398	0.388033	1.29443	0.53993	0.650771	-0.198634	0	0	0	0	0	0	0	0	0
AC011511.4	0.413208	0.465499	0.818316	0.0574345	0.0213006	0.412755	-0.0609991	-0.266023	-0.227981	-0.566227	-0.602724	-0.58656	-0.914102	-0.802332	-0.01402	-0.320291	-0.285043	-0.387411	-0.507437	-0.82104	-0.594572	-0.623966	-0.63741	-0.71546	-0.643682	-0.637751	-1.09225	-1.30241
AC011511.5	0.048597	4.5293e-05	0.00620428	0.0126227	0.00589628	0.0235279	-0.01193	0.0326149	0.0268461	0.00428144	0.00848993	0.0273927	0.00343536	0.00720477	0.0741205	0.0736633	0.0992887	0.106951	0.0940693	-0.0589287	-0.0320964	-0.0322453	-0.000192429	-0.0489073	-0.0403333	-0.0311816	0.107162	0.0152505
AC011516.1	0	0	0	0	0	0	0	0	0	0	0	0	0	0	0	0	0	0	0	0	0	0	0	0	0	0	0	0
AC011518.1	0	0	0	0	0	0	0	0	0	0	0	0	0	0	0	0	0	0	0	0	0	0	0	0	0	0	0	0
AC011523.1	0	0	0	0	0	0	0	0	0	0	0	0	0	0	0	0	0	0	0	0	0	0	0	0	0	0	0	0
AC011524.1	0	0	0	0	0	0	0	0	0	0	0	0	0	0	0	0	0	0	0	0	0	0	0	0	0	0	0	0
AC011524.2	-0.0883753	-0.261036	-0.169369	-0.261036	-0.171127	0	0	0	0	0	0	0	0	0.128361	0.187625	0.35788	0	0	0	-0.0878439	-0.0878439	-0.0878439	-0.0878439	-0.0878439	-0.0878439	-0.0878439	-0.0878439	-0.0878439
AC011525.1	-0.00295249	-0.00295249	-0.00295249	-0.00295249	-0.00295249	0	0	0	0	0	0	0	0	0	0	0	0	0	0	0	0	0	0	0.00902512	0	0	0.00499622	0
AC011525.2	0	0	0	0	0	0	0	0	0	0	0	0	0	0	0	0	0	0	0	0	0	0	0	0	0	0	0	0
AC011530.1	-0.144802	0.262239	-0.13944	0.00426896	0.178307	-1.63408	-0.839812	-1.63408	-1.63408	-1.56858	-1.63408	-1.13248	-1.58816	-1.46753	0.0357307	0.408925	0.373919	0.0917119	-0.195536	0.00197623	0.114253	-0.0410707	-0.00897212	0.125053	-0.00697437	-0.169836	-0.155585	-0.067657
AC011586.1	0	0	0	0	0	0	0	0	0	0	0	0	0	0	-0.138779	0.00448478	-0.138779	-0.138779	-0.138779	0	0	0	0	0	0	0	0	0
AC011591.1	0.32235	0.134824	-0.1014	-0.158535	0.154733	0.172809	0.0549779	0.76855	0.342989	0.771416	0.687197	0.890615	0.653411	0.101783	-0.212914	-0.388671	-0.384554	-0.535711	-0.20513	0.119494	0.0490549	0.0862129	0.140516	0.0734776	-0.0655539	0.0818166	-0.103037	-0.00106787
AC011595.1	0.0320029	0	0	0	0	0	0	0	0	0.0271631	0	0	0	0	-0.138244	-0.138244	-0.138244	-0.138244	-0.138244	0	0	0	0	0	0	0	0	0
AC011595.2	0.12739	-0.0373197	0.00923542	0.165313	0.0441045	0.0219847	-0.0911066	-0.202096	-0.145221	-0.104921	-0.0388667	-0.237173	-0.28655	-0.175165	0	0	0.200255	0.106379	0.474533	-0.0975665	0.051067	0.0172781	-0.0563519	-0.039777	-0.133471	-0.0338431	0.0608793	-0.133471
AC011601.1	0	0	0	0	0	0	0	0	0	0	0	0	0.0327345	0	-0.10011	-0.10011	-0.10011	-0.10011	-0.10011	-0.00750207	-0.0482292	-0.0482292	-0.0482292	-0.0482292	-0.0482292	-0.0482292	-0.0482292	-0.0482292
AC011603.1	-0.156407	-0.156407	-0.156407	0.0103629	0.0168471	0.282195	0.157328	0.150048	0	0	0.338503	0	0	0	0	0.108756	0	0	0	-0.0129671	-0.243018	-0.190926	-0.243018	-0.243018	0.00812335	-0.243018	-0.243018	-0.243018
AC011603.2	-1.13933	-1.71548	-1.66493	-0.579662	-0.161013	-1.77093	-1.08214	-1.52	-0.359243	-1.74715	-1.92878	-1.40371	-2.91148	-3.0931	-0.6272	-0.410668	-1.35339	-0.761563	-1.49359	0.087013	0.0508532	-0.201861	-0.191069	-0.349272	-1.00954	-1.44154	-2.39045	-1.33041
AC011603.3	0.0167938	-0.148134	0.33789	0.460452	-0.148134	-0.32224	2.07042	-0.151934	0.0967083	-0.208561	-0.32224	0.0487803	-0.113924	-0.248782	0	0	0.347396	0	0.625398	0.0345113	0.46415	-0.314851	0.261199	0.439599	0.155765	0.397533	-0.161242	-0.159853
AC011604.2	0	0	0	0	0	0	0	0	0	0	0	0	0	0	0.0240325	0	0	0	0	0	0	0	0	0	0	0	0	0
AC011611.2	0	0	0	0	0	0	0	0	0	0	0	0.100108	0.077726	0.0480525	-0.380842	-0.380842	-0.134085	-0.380842	-0.380842	0.0858529	0	0	0.117195	0	0	0	0	0
AC011611.3	-0.0722952	0.043616	0.086165	-0.12308	0.184432	-0.142985	-0.207927	-0.0369496	0.0176083	-0.0188774	0.0904717	0.0883451	-0.169278	-0.295447	-0.257313	0.120823	0.0910462	0.299106	-0.0188704	0.0435861	0.046705	0.204203	0.266962	0.231703	-0.096838	0.0696411	0.0518106	0.0693426
AC011611.4	0.0646192	-0.0791587	0.133682	0.100513	0.00994832	-0.0584581	0.157502	0.0398491	-0.00457582	0.0990522	0.0900644	0.228586	0.233972	0.187598	-0.22141	-0.223894	-0.219913	-0.13297	-9.73e-05	0.0569423	0.00588376	0.255557	0.0584394	0.236412	0.402947	0.0997551	0.0989556	0.239462
AC011625.1	0	0	0	0	0	0	0	0.0509478	0	0	0	0	0	0	0	0	0	0	0	0	0	0	0	0	0	0	0	0
AC011632.1	-0.000690723	0.0328308	-6.77512e-05	-0.0018254	-0.00116065	-0.0501134	-0.0207193	0.0309723	-0.0501134	-0.0501134	-0.0501134	-0.0501134	-0.00442312	-0.0283419	-0.0336183	-0.120859	-0.217028	0.107486	-0.0104659	0.00362379	-0.00370759	0.0271734	-0.00294336	-0.00189703	0.207544	0.0317644	-0.0027694	0.000772632
[truncated: 31,535 more rows]

## Sheet: TP2
pathway	pval	padj	log2err	ES	NES	size	leadingEdge
[truncated: 50 more rows]

[truncated: 27 more sheets: TP4, TP5, TP6, TP7, PDL25, PDL28, PDL33, PDL37, PDL45, PDL46, PDL50, PDL52, PDL53, d3, d4, d5, d6, d9, D1.5c, D2c …]
