# Supplementary material for: Novel insights from a multiomics dissection of the Hayflick limit
Source: eLife. 2022 Feb 4;11:e70283. doi: 10.7554/eLife.70283 (PMC8933007; doi:10.7554/eLife.70283)
Supplement: Figure 3—source data 1. [file elife-70283-fig3-data1.xlsx]

## Sheet: readme
sheet:gsea_input_protein	enclosed matrix is relative protein abundance (log2 fold change) (to PDL20 for RS and TP1 for hTERT) for confidently measured proteins (rows)
	at each time point (hTERT) or RS PDL (column). Reference not included
	values are averaged from 3 replicates
	used for GSEA
sheet differential analysis	signficance testing of changes over time for PDL and hTERT timecourse
sheet PDL-TP	GSEA results with leading edge genes
	Pvalues used for Figure 3A

## Sheet: gsea_input_protein
gene	PDL25	PDL29	PDL33	PDL37	PDL46	PDL50	hTERT2_fc	hTERT4_fc	hTERT5_fc	hTERT6_fc	hTERT7_fc
MEX3A	-0.390125	-1.47391	-1.20184	-1.17615	-0.939557	-1.88919	0.255151	-0.212	0.306656	0.760518	0.323863
FAM92A1	-0.095355	-0.0498633	-0.0286318	-0.0724005	-0.265053	-0.526546	0.203872	0.112098	0.223673	0.315726	0.354481
NBAS	0.19944	0.269362	0.304272	0.300158	0.249914	0.669601	-0.0186761	0.0921593	0.00688162	-0.0895673	-0.0695859
RAB19	0.259499	0.206192	0.191163	-0.0373315	-0.161749	0.353406	-0.0125621	0.375809	0.238112	0.0979844	0.239106
BTBD11	0.45551	0.372896	0.138485	0.386711	0.155162	1.19361	-0.233081	-0.112947	NA	NA	NA
FAM127A	0.196258	0.275078	0.0835571	-0.0051863	-0.00537163	-0.167603	-0.285263	-0.0724652	-0.0891846	-0.0981403	-0.214661
ZSWIM8	-0.0376309	0.0141913	-2.6913e-05	-0.0983949	-0.0809863	-0.206531	0.0537743	0.102988	0.0755751	0.0661759	0.186536
FAM171A2	0.512852	0.834197	0.654213	0.773981	0.729576	1.32798	0.10783	0.180988	0.238298	0.240127	0.239957
SNRPGP15	-0.327129	-0.617781	-0.601241	-0.551534	-0.516281	-0.825253	-0.211947	-0.387486	-0.425364	-0.356977	-0.347944
PSMD9	0.226914	0.315323	0.222573	0.223284	0.167771	0.212002	-9.69399e-05	-0.0796911	0.0101965	0.0157216	0.0536594
RFXAP	-0.520298	-0.636081	-0.744767	-0.520185	-0.598632	-0.950888	NA	NA	NA	NA	NA
DCTN6	0.212452	0.359378	0.257941	0.35726	0.299089	0.771764	0.0533328	0.144389	0.18985	0.0426127	0.200286
SLC33A1	0.0426183	0.331787	0.368999	0.37118	0.156933	0.7125	0.198316	-0.0346655	-0.00121201	0.120315	0.19448
MAN2B1	0.159904	0.454651	0.381586	0.526032	0.600451	1.52608	-0.0476451	0.146409	0.0571115	0.0388682	-0.0488232
CDK2AP1	-0.396628	-0.681349	-0.910937	-0.679014	-0.655079	-1.45414	0.00636287	0.0464521	-0.134454	-0.0635169	-0.0488016
TOR1B	-0.268289	-0.21323	-0.12092	-0.201529	-0.152396	0.356128	-0.225502	-0.218163	-0.227078	-0.336879	-0.121546
ABCD4	-0.124968	-0.0955951	-0.0761952	0.0612631	-0.247305	0.723739	0.0308693	0.100504	-0.064543	-0.148806	-0.101477
PRMT5	-0.0349286	-0.0592792	0.0143312	-0.0439475	-0.146899	0.0343442	0.0671672	0.0634598	0.052684	-0.0500694	-0.0814994
TAX1BP3	-0.0899175	0.094181	-0.171397	-0.00960072	0.145929	0.139654	-0.062943	-0.170743	-0.309139	-0.222714	-0.302523
CLGN	0.103613	0.128026	0.0752351	0.115362	-0.091307	-0.852468	0.0150127	0.000153581	0.0406107	-0.093068	-0.0971653
SPTBN2	0.184785	0.365362	0.216233	0.333333	0.337028	0.493851	-0.162983	-0.127691	-0.111984	-0.292709	-0.251982
TECPR2	0.0339785	0.154626	0.141207	0.25434	0.208321	0.614616	0.101235	0.163574	0.0434229	0.0565248	0.114222
CTDSPL	-0.132555	-0.0698857	0.072827	-0.0649905	-0.393785	0.073234	0.15323	0.0861548	0.0125303	0.0394344	0.255586
HDAC3	-0.456521	-0.68937	-0.583105	-0.551695	-0.484419	-1.19935	0.0680844	-0.00517849	-0.0508461	-0.0646745	-0.155387
IPO8	-0.189815	-0.223686	-0.245823	-0.362397	-0.372212	-0.70823	0.0263221	-0.075292	0.00812448	-0.103807	-0.0611527
ABCC3	-0.0269857	0.105374	0.13638	0.145441	0.342295	0.712628	0.201371	0.650853	0.482464	0.546879	0.566391
SGSM2	NA	NA	NA	0.173111	-0.0736733	0.352218	0.054908	0.334324	0.359663	NA	NA
PLXNB1	0.327575	0.582522	0.657495	0.929254	0.897492	1.88997	0.103885	0.386243	0.258707	0.0355856	0.0932315
PHF1	-0.064817	-0.24783	-0.329485	-0.249075	-0.0168653	-0.439139	-0.313536	-0.11883	-0.474249	-0.0784635	-0.195551
PSMD3	0.00120905	0.0348531	0.0562635	0.017124	-0.0895446	0.142807	0.0550288	0.0432361	-0.00884013	-0.0381391	-0.108336
NARS	0.127771	0.212709	0.158552	0.0872019	-0.0188596	0.21039	-0.00600919	-0.0381983	-0.0485848	-0.0182724	0.0983414
STRN	0.0524332	0.0271672	0.0356726	0.234283	0.123079	0.57403	0.190053	0.192935	0.110818	0.0146572	-0.0839439
C21orf2	-0.0187074	-0.0673141	-0.342528	0.240509	0.291596	0.139016	0.234163	-0.000904054	0.0414638	0.396286	0.199117
CALU	0.00752086	0.502096	0.0969093	0.360239	0.683866	1.04913	0.268167	0.333668	-0.0168431	0.394744	0.133029
SNAP91	0.227276	0.259843	0.293588	0.170753	0.296799	0.163408	0.0427205	-0.149643	0.0213412	-0.07258	-0.0985163
UGDH	-0.234951	-0.12156	-0.130498	-0.180436	0.133026	-0.535115	-0.443153	-0.381893	-0.295988	-0.274158	-0.325415
EDF1	-0.0726704	-0.0696763	-0.108822	-0.115286	-0.0216979	-0.121164	0.024308	-0.0926685	-0.00284907	-0.0824086	0.06505
DNAJC6	1.23088	-1.20158	-1.32848	-0.892461	-0.131015	0.535378	1.88917	1.51454	NA	NA	NA
DUSP11	-0.374869	-0.576649	-0.580101	-0.677163	-0.686573	-1.04975	-0.126999	0.094961	0.186419	0.125877	0.144441
SNN	NA	NA	NA	-0.259129	-0.412251	0.0442816	0.162225	0.432378	0.347325	NA	NA
H2AFY	0.575454	0.241329	0.456343	0.283484	0.407048	1.02459	0.25813	0.219556	NA	NA	NA
H2AFY.1	-0.174845	-0.437963	-0.321554	-0.198098	-0.307316	0.160657	0.298623	0.226034	0.198437	0.175363	-0.014698
MTX2	-0.0323729	0.0895295	0.119084	0.0478836	0.0416964	0.660183	0.108678	0.0974973	0.0277962	0.142851	0.0923719
SAP30	-0.71059	-0.911494	-0.866944	-1.18442	-1.23279	-1.93711	-0.0452004	-0.479802	-0.0518402	0.253872	0.165996
CLDN11	-0.0763831	-0.0462228	0.0869175	-0.174597	0.0194791	-0.965571	-0.400113	-0.68493	-0.402568	-0.271376	-0.526444
TADA3	-0.23376	-0.481919	-0.49173	-0.600585	-0.531521	-0.73272	-0.122354	-0.317568	-0.144583	0.119053	-0.0316232
EED	-0.530079	-0.8851	-0.777588	-0.922989	-0.92051	-1.50768	0.00201226	-0.267506	-0.230033	-0.0412449	-0.139336
CSDE1	-0.1006	-0.182186	-0.214662	-0.261844	-0.247004	-0.309764	-0.0988556	-0.0529894	-0.0554636	-0.111781	-0.106978
MTRF1	NA	NA	NA	-0.281331	-0.00660298	-0.616887	0.0765959	-0.159289	0.139595	NA	NA
NPM3	-0.166656	-0.68456	-0.498081	-0.612924	-0.610124	-1.08912	0.232405	0.161775	0.293339	0.292539	0.261942
SERPINB7	0.518718	0.622093	0.622034	0.71528	-0.0767886	-0.235919	0.345179	0.0550347	0.090791	0.0218193	0.179147
NUP155	-0.420307	-0.675531	-0.637007	-0.762762	-0.645404	-0.902928	-0.210677	-0.327491	-0.321449	-0.276491	-0.226417
PPP1R37	0.022	-0.164859	-0.0509362	-0.0754525	-0.172967	0.0343016	0.0329956	0.0861074	-0.0704748	-0.287323	-0.191934
RBBP9	0.244764	0.385907	0.345775	0.310102	0.00176256	0.732288	-0.0190581	0.108828	-0.263055	-0.348745	-0.28179
PIAS2	-0.400639	-1.17932	-0.800912	-0.598998	-0.676827	-1.12916	0.0177202	0.120554	0.140172	0.129269	-0.0659918
RSL1D1	-0.31548	0.0703925	-0.185782	-0.222093	-0.246351	-0.786461	-0.214661	-0.429225	-0.355282	-0.192235	-0.169289
WFS1	0.491407	0.790712	0.658324	0.795054	0.79929	1.791	0.0479362	0.315442	0.127648	0.133197	0.135007
ZFAND5	-0.0396155	-0.174935	-0.296658	-0.31926	0.00929617	-0.299358	-0.0630408	0.279829	0.366374	0.479323	0.465056
RECQL4	-1.27363	-3.25031	-1.76799	-1.72434	-1.40614	-1.97802	-0.00426427	-0.543004	-0.154141	0.0604405	0.090179
TOMM70	0.0574491	0.172418	0.109556	0.201933	0.130111	0.717503	0.0652879	0.128754	0.161311	0.166824	0.138521
PLEKHG5	0.160375	0.376671	0.425984	0.417236	0.293847	0.500447	-0.337817	0.0269864	-0.146489	-0.256679	-0.25504
DDHD2	0.0319664	-0.02629	-0.027299	-0.129666	-0.107656	0.158732	0.178978	0.246056	0.216532	0.281861	0.207995
SASH1	-0.0635739	0.161575	0.263603	0.418417	0.375762	0.237486	0.1977	0.0340343	0.175913	0.195878	0.232546
FRYL	0.0713626	-0.0149652	-0.119493	-0.10897	-0.172718	-0.389817	0.0535353	0.0421828	0.0359295	0.0632676	0.108072
GLCE	-0.0852011	-0.16782	-0.181126	-0.365468	-0.228576	-0.972082	-0.0217813	0.0925742	-0.00734836	0.0869097	-0.0238747
ABLIM3	0.587802	0.470402	0.470164	0.532991	0.895154	1.14636	0.292878	-0.00879743	0.155869	0.580182	0.513718
ABLIM3.1	0.455522	0.454551	0.479209	0.615376	0.620463	1.44176	-0.225518	-0.159815	-0.356284	-0.25107	-0.216351
CEP152	-0.117123	-0.366711	-0.330218	-0.675235	-0.474412	-0.246504	-0.281561	-0.170685	-0.388126	-0.739369	-0.00392059
NDUFA3	0.369775	0.346361	0.414046	0.603813	0.529368	0.843733	0.17244	0.289905	0.39062	0.230243	0.141299
MAP3K6	0.0754162	0.0420361	0.266361	0.164208	0.245104	0.257714	-0.0676277	-0.116133	-0.0954967	-0.20684	-0.14491
SGPL1	-0.0060317	-0.0190727	0.0977972	0.181568	0.189709	0.796549	-0.0977867	-0.0903283	-0.152902	0.0702133	-0.0227658
CPSF4	-0.425284	-0.73817	-0.698181	-0.587498	-0.515692	-0.985157	0.400746	0.129598	0.17105	0.16131	0.258634
BAG3	0.784829	1.11296	0.958046	1.26819	1.33541	1.54151	0.317775	0.407268	0.545811	0.39053	0.395118
MLYCD	0.252214	0.547916	0.542384	0.604778	0.498363	1.36639	-0.0489	0.087947	-0.0217297	-0.230242	-0.417824
CRYZL1	0.209552	0.0907498	0.137975	0.180585	0.191921	0.502532	0.230306	0.242465	0.147031	0.105527	-0.00746748
TXNDC12	0.0715807	0.0972232	0.115867	0.208383	0.274278	0.611701	0.0251176	0.114672	0.0518008	0.114443	-0.0500175
ECD	-0.209528	-0.347082	-0.345694	-0.503314	-0.611184	-0.954132	0.00414629	-0.0855365	-0.00712583	-0.176625	-0.0409734
NUDT3	0.122969	-0.00542878	0.0906165	0.050109	0.156165	0.687013	-0.0810344	0.0251332	-0.101781	-0.0848273	-0.0431818
TOMM40	-0.181111	-0.26481	-0.280809	-0.278524	-0.335394	-0.0734012	0.0651149	-0.015935	-0.164353	-0.1886	-0.162318
PLG	-0.13805	-0.376887	-0.473181	-0.497912	-0.711691	-0.254761	0.0487566	0.293846	NA	NA	NA
PLAT	0.317517	0.18252	0.463778	0.642259	1.80779	1.7883	0.207441	0.685008	0.568471	1.42314	0.957455
ADA	0.720214	1.34429	1.38481	1.73177	1.99561	3.33431	-0.363266	-0.169536	-0.255332	-0.178319	-0.337154
CST3	0.499295	0.411967	0.416334	0.260349	0.225937	0.621814	0.214447	0.39952	0.218519	0.343785	0.196085
LMNA	-0.260742	0.0440037	-0.218762	-0.225262	-0.0782966	-0.414714	-0.159959	-0.0551827	0.145081	0.129089	0.0857502
C9	-0.314936	0.00950605	-0.227147	0.00170608	-0.0299468	0.0996583	0.132707	0.432595	0.426139	-0.169547	-0.265509
ERBB2	0.192499	0.28768	0.294062	0.312999	0.430413	0.774056	0.0372071	0.20671	0.113073	0.0124433	0.00954037
GYPC	0.305281	0.82137	0.32624	0.131468	0.245108	0.166933	-0.296801	0.333612	-0.0863344	-0.0463865	-0.290621
ATP1B1	-0.0709672	-0.0626442	-0.141316	-0.460723	-0.514864	-0.71897	0.109661	0.136882	0.0110906	-0.0431483	-0.0500989
PCCA	0.056319	0.15152	0.10552	0.268212	0.340016	0.878684	0.21597	0.407664	0.424507	0.434118	0.389448
RPLP1	0.0654012	-0.0704208	-0.0880253	-0.179388	-0.226178	-0.326116	-0.0379972	-0.0061944	-0.0410976	-0.0864355	-0.241442
ITGB1	0.0605246	0.142224	0.146658	0.135009	0.0891663	0.329097	-0.0389641	0.0386147	-0.0214215	-0.243338	-0.160524
GLA	0.321204	0.458735	0.443284	0.670188	0.461133	1.88165	0.0198453	0.308726	0.230551	0.120624	0.153147
ERCC1	-0.514091	-0.507133	-0.541858	-0.565418	-0.553024	-1.21321	-0.381475	-0.519663	-0.374576	-0.525445	-0.172945
ASNS	-0.257908	-0.495991	-0.623686	-0.850871	-0.831953	-1.80118	-0.219138	-0.288956	-0.396987	-0.121005	-0.138298
MME	0.552158	1.1037	1.02054	1.12093	-0.619705	1.06097	0.315318	-0.127692	-0.538363	-1.09635	-0.787874
WNT2	0.0270577	3.15146	0.0370116	0.426979	0.218058	0.406021	NA	NA	NA	NA	NA
U2AF1L5	-0.380413	-0.596055	-0.539435	-0.59765	-0.521852	-1.27328	0.0503273	-0.17239	-0.175064	-0.0203121	-0.0356464
GLI2	-0.0064147	0.0135762	-0.0570609	0.142273	0.0872939	-0.293006	0.231346	0.0924351	0.22092	0.437723	0.364061
CLU	0.231704	0.0638212	0.0256883	0.0804938	0.811267	0.90168	0.725192	1.23209	1.10212	0.795518	0.62044
PDHB	0.114958	0.231527	0.229226	0.265041	0.242361	0.774381	-0.072882	0.0454413	-0.0155183	-0.0871667	-0.179832
PRPS2	0.319777	0.430831	0.576922	0.626372	0.578893	1.35625	0.0171621	0.0776197	0.0397045	0.0128032	0.0610347
F3	-0.145397	0.142266	0.244573	0.758278	1.93993	1.91349	-0.632006	-1.06877	-1.28158	-1.06938	-1.24562
ENO3	0.143555	-0.0543288	-0.0512007	-0.481177	-0.530293	-0.0978154	0.337042	0.491276	0.334372	-0.343384	-0.220127
CCDC130	-0.340928	-0.533904	-0.481432	-0.329893	-0.261311	-0.813984	0.14255	-0.100395	0.312176	NA	NA
MTHFD2	-0.289694	-0.50247	-0.810731	-0.695074	-0.696898	-1.73679	-0.20936	-0.580805	-0.561434	-0.0600473	-0.197092
FDPS	0.114647	0.649673	0.306066	0.59257	0.511835	0.812899	-0.301564	0.00898571	-0.0380569	-0.0851852	0.0968984
AKR1A1	0.219717	0.667728	0.621327	0.789786	0.714966	1.51467	0.0844897	0.281088	0.2168	0.0616147	0.178899
ANPEP	0.240401	0.328332	0.724569	1.04981	0.752221	1.62292	0.19111	0.369135	0.301472	0.284459	0.167912
EZR	0.251831	0.552505	0.31884	0.257584	0.381701	-0.211431	-0.409287	-0.534317	-0.379553	-0.288874	-0.302115
ATF2	-0.128275	-0.105644	-0.118405	-0.304585	-0.449324	-0.494846	0.0164396	-0.0206159	-0.00711462	0.47749	0.326096
CPE	0.268126	0.129629	0.120356	-0.154146	-0.288009	0.254385	0.978183	1.34407	1.22303	1.06722	0.969075
ZKSCAN1	0.033916	-0.169116	0.0102333	-0.102441	0.159669	-0.535882	0.0855028	0.131418	0.165137	0.296892	0.300959
ZNF28	NA	NA	NA	NA	NA	NA	NA	NA	NA	NA	NA
CEBPB	-0.32864	-0.522973	-0.429903	-0.4949	-0.312888	-0.762503	0.185799	0.173902	0.0944366	0.384871	0.326873
CTPS1	-0.174093	-0.169004	-0.165552	-0.126041	-0.139281	0.0123976	-0.156631	-0.263636	-0.244583	-0.148851	-0.121658
TCP1	0.0310568	-0.0583994	-0.0502809	0.0586742	-0.0217999	0.207511	-0.016548	0.0293425	-0.048714	-0.0825335	-0.0800722
TRIM21	0.0610673	0.0297009	0.14657	0.145933	0.100324	-0.0687558	-0.172769	-0.189379	-0.207006	-0.106502	-0.231438
SRM	0.109788	0.0594899	0.0556571	0.0634591	0.0544881	0.404827	-0.0202476	-0.0346575	-0.139301	-0.160016	-0.150935
ATP2B1	0.218287	0.322761	0.349976	0.283428	0.0770238	0.226329	-0.00130956	0.132126	0.0101549	-0.205182	-0.154304
CAST	-0.0848145	0.445317	0.0252601	0.382521	0.580986	0.15848	-0.473193	-0.369816	-0.0926415	-0.203611	-0.454202
IMPDH1	-0.10591	-0.186846	-0.214923	-0.362432	-0.309367	-0.66711	-0.00799705	-0.111117	-0.0225317	0.0486335	-0.0504366
RASA1	-0.00853643	-0.146298	-0.0264097	-0.000137559	0.150059	0.771608	-0.124581	-0.111526	-0.130148	0.03723	0.0960273
TGM2	1.06129	1.27611	1.469	1.76661	1.52636	1.82878	-0.415519	-0.562345	-0.617871	0.00916685	-0.299862
ENPP1	0.197054	0.176717	0.180264	-0.0067527	0.0121134	-1.30135	-0.215409	-0.424963	-0.351915	0.155241	-0.127487
PTPRG	0.144046	0.277774	0.237323	0.142991	0.174084	0.433365	0.111895	0.267336	0.136916	0.0336971	0.00905732
CPT2	0.352259	0.598295	0.566108	0.690272	0.608736	1.36844	-0.0514406	0.055937	0.014355	0.0640877	-0.0126658
RRM1	-0.570577	-0.949637	-0.832856	-1.1755	-1.07196	-2.02866	-0.262519	-0.463281	-0.425359	-0.270276	-0.289419
POLR2A	-0.225858	-0.637418	-0.573402	-0.700179	-0.586089	-1.18256	0.0482328	-0.13212	-0.097863	0.0487197	0.0192185
DDX6	-0.319687	-0.297774	-0.278655	-0.375364	-0.415584	-0.713991	-0.146262	-0.179581	-0.0901105	-0.109771	-0.0601529
ARNT	-0.159183	-0.419444	-0.238784	-0.173582	0.00371864	-0.555899	0.899029	0.823581	0.884089	1.03778	0.995425
RBL1	-0.747273	-1.44974	-1.39588	-1.58764	-1.80094	-2.87835	NA	NA	NA	NA	NA
GTF2E1	-0.0665946	-0.253813	-0.178003	-0.122233	-0.140994	-0.369547	0.0261374	0.0683804	0.157774	0.273402	0.337132
GNA11	0.221569	-0.0523962	0.237325	0.2341	0.284785	0.670639	0.188767	0.191367	0.0607076	-0.0106689	-0.0112842
RPL12	0.0115012	-0.0334837	-0.148626	-0.0860673	-0.0774678	-0.287842	-0.360057	-0.410578	-0.395236	-0.329042	-0.322521
NKTR	-0.238492	-0.502431	-0.32809	-0.612621	-0.583248	-1.05687	0.127546	0.0132457	0.0878109	0.233402	0.272962
CLIP1	0.0207585	-0.407485	-0.144793	0.0451182	0.132658	0.384841	0.42345	0.357336	0.73866	0.376945	0.197149
CPS1	0.0995652	0.081845	0.211916	-0.18947	-0.0192524	-1.55035	-0.198838	-0.222322	-0.187158	0.184837	0.0789713
STIP1	0.0667566	0.0942983	-0.05847	0.0533826	0.090321	0.144838	-0.090739	-0.069013	0.0719735	0.0316623	-0.0278287
L1CAM	NA	NA	NA	2.12036	0.95445	0.757109	-1.88825	-3.04802	-1.31917	NA	NA
ACSL1	0.0370785	0.149752	0.102231	0.102174	-0.177444	0.776228	0.143057	0.225036	0.11246	-0.0262329	0.0203593
S100A3	-0.177495	-0.0935642	-0.137405	0.0250087	0.148591	0.257408	0.433608	0.800029	0.653883	0.73805	0.426043
CTNNB1	0.125231	0.0653183	0.0302442	-0.0392638	-0.0246001	0.131005	0.00944761	0.0569759	0.0645695	-0.119539	0.00533213
PCGF2	-0.631659	-0.716526	-0.779733	-0.763436	-0.566531	-1.54062	-0.0361693	-0.0752655	0.0188312	0.155513	0.296805
GTF2F1	-0.196211	-0.182148	-0.228492	-0.352607	-0.320609	-0.901027	0.0270814	-0.193189	0.219559	0.394912	0.260211
PTGER4	NA	NA	NA	-0.704859	-1.05281	-1.57676	0.544898	0.229084	0.139199	NA	NA
THBS2	0.326798	0.467943	0.456341	0.488255	0.379441	0.515013	0.428068	0.548306	0.221903	0.174377	0.380211
COPB2	0.190298	0.268706	0.273243	0.238056	0.244509	0.357517	-0.111207	-0.0675241	-0.0680554	-0.0635613	-0.048362
ADD1	0.20737	0.273322	0.303478	0.452432	0.471443	0.319141	0.159017	0.0880773	0.112681	0.25126	0.122734
PPM1A	0.0162944	0.330712	0.206156	0.335496	0.283859	0.554269	0.0802547	0.173924	0.118645	0.137684	0.0488763
ARL3	-0.0154691	0.131699	0.108799	0.298416	0.211945	0.425038	-0.0156218	-0.144193	-0.180861	0.0625031	0.0660578
GMPR	0.590119	0.65681	0.731474	0.673228	0.923459	1.84586	0.289641	0.649545	0.489614	0.24959	0.182007
ANP32A	-0.0724575	-0.437486	-0.198836	-0.260394	-0.163409	-0.550587	0.173602	0.00621261	0.288141	0.341926	0.184958
CUX1	-0.032931	0.0764838	-0.092875	-0.0548179	0.000427124	-0.344024	0.0234745	0.0237251	0.023108	0.0940517	0.162008
NNMT	0.939881	1.65146	1.88099	2.3187	2.29842	3.49936	-0.0971516	-0.0783861	-0.281851	0.193854	0.0689148
HADHA	0.319767	0.578907	0.597804	0.655492	0.543552	1.51317	-0.00514681	0.118549	0.0464845	-0.0585455	-0.0654911
ETV3	-0.354152	-0.511374	-0.400051	-0.238763	-0.143659	-0.789269	0.40754	0.153342	0.443374	0.568971	0.900737
GARS	0.25021	0.442611	0.324954	0.34915	0.201267	0.584093	0.105278	0.21046	0.056481	0.0738024	-0.0376983
SKIV2L2	-0.450392	-0.77141	-0.669631	-0.797143	-0.777126	-1.5182	-0.098494	-0.436752	-0.250696	-0.177229	-0.0570882
MTOR	0.116917	0.195061	0.187778	0.27257	0.156073	0.70502	0.197976	0.21381	0.238511	0.139242	0.122533
CASP3	0.322481	0.212943	0.146616	0.229205	0.550067	0.215179	-0.100563	-0.292744	-0.333918	-0.062509	-0.270483
GRK6	0.23419	-0.20135	-0.266364	0.632429	0.61429	-0.123098	-0.236633	-0.487889	-0.673101	-0.439235	-0.356039
RANBP1	-0.510428	-0.670518	-0.650757	-0.626237	-0.588506	-0.858188	0.0110319	0.0472651	0.128984	0.0533995	0.0452232
ATRX	0.0114203	-0.0653464	-0.0515463	-0.0148983	-0.0542539	-0.48227	0.0981835	0.126263	0.143947	0.299093	0.259571
LIMS1	0.217199	0.377248	0.460864	0.353662	0.0581616	-0.0854983	-0.466156	-0.689475	-0.944082	-0.876596	-0.763184
MARCKSL1	-0.171437	-0.681479	-0.658444	-0.681786	-0.392737	-1.52862	-0.0322406	0.19909	0.171302	0.25578	0.1994
CENPF	-0.862667	-1.64987	-1.32721	-1.59404	-1.76884	-2.8874	-0.0213156	-0.370666	-0.20592	-0.371856	0.14789
VEGFC	0.0942885	-0.184362	-0.143699	-0.348546	-0.182603	-0.738791	0.0954532	0.17138	-0.0817953	-0.507408	-0.0195528
GNAQ	0.129799	0.153129	0.166011	0.209924	0.212205	0.748103	-0.00568752	0.0970732	-0.0525191	-0.131542	-0.152489
RAB5C	0.177222	0.270721	0.284856	0.241808	0.0928486	0.655618	0.00629624	0.109884	-0.0471385	-0.21023	-0.120831
RAB9A	0.0176559	0.390156	0.41476	0.32125	-0.154952	0.62134	0.136291	0.165108	-0.114142	-0.382508	-0.251655
RAB27A	-0.255475	-0.00463472	0.00897986	0.0116066	-0.126263	0.0292621	0.0855235	-0.0151968	-0.121243	-0.0517249	-0.044431
DAP3	-0.144299	-0.215705	-0.146049	-0.0614135	-0.186161	-0.308413	0.148829	0.163701	0.178556	-0.121494	-0.0300365
SUOX	0.0150412	-0.0474867	-0.0471095	-0.134672	0.112351	-0.423246	-0.0446997	0.0307527	0.017805	0.0448142	-0.190728
RAP1GDS1	0.17078	0.0871504	0.138817	0.159869	0.141959	0.271088	0.0400852	0.0719277	0.120417	0.0771547	0.0885983
GTF2A1	-0.269367	-0.584633	-0.572959	-0.623242	-0.543197	-0.942269	-0.0419463	-0.145071	-0.131368	0.0691542	-0.070599
HK2	0.119214	0.131563	0.156368	0.0552227	0.0142691	0.49108	-0.0685826	-0.00699376	-0.137366	-0.20835	-0.111106
NUP98	-0.265862	-0.579481	-0.522635	-0.575666	-0.486343	-0.737523	0.00376332	-0.0603179	-0.0688516	-0.00526134	-0.054296
SUCLG1	0.101094	0.253803	0.2369	0.313055	0.171603	0.645635	-0.0455039	-0.114404	0.119844	-0.00316816	-0.0254656
ITGA8	1.37177	0.287611	1.47575	-0.0736478	-0.396151	0.0369575	-0.719475	0.355757	0.16099	-0.100378	-0.159417
MAPK12	-0.0627688	0.0273171	0.0971263	0.0817873	-0.0508514	0.429187	0.488522	0.301872	0.367107	0.273943	0.403929
CACNB3	-0.0345829	-0.138414	-0.0287529	0.000620863	0.214578	0.29997	0.0148553	0.235264	0.247129	0.28527	0.214787
HSPA2	-0.18894	-0.309415	-0.262343	-0.131362	-0.0777085	-0.244623	0.0608447	0.354949	0.386564	0.526119	0.457087
ADAR	-0.193594	-0.396388	-0.348031	-0.330135	-0.241296	-0.568479	0.176836	0.238025	0.188092	0.238566	0.166845
EIF3B	-0.0714776	-0.0363114	-0.0841356	-0.187818	-0.181073	-0.249543	-0.340708	-0.308977	-0.229495	-0.263014	-0.253267
BID	0.191701	0.481802	0.501139	0.766324	0.823102	0.921071	0.738418	0.598619	0.772826	0.849136	0.754787
NDUFA6	0.11226	-0.142422	0.210349	0.0812811	0.00919509	0.412416	-0.0701331	0.104146	-0.00808696	-0.739464	-0.574063
TMEM50B	0.36519	0.232936	0.311079	0.477258	0.220962	0.351682	0.427482	0.180514	NA	NA	NA
BACE1	-0.267044	0.397365	0.0314266	-0.240453	-0.541577	0.407025	-0.488052	-0.044954	-0.176748	-0.423076	-0.253329
JAM2	-0.275934	-0.430931	-0.495376	-0.443344	-0.542754	-0.841465	0.0383608	0.318642	0.239874	0.020226	-0.178029
NUP107	-0.254551	-0.432136	-0.433527	-0.565967	-0.490412	-0.74419	-0.172594	-0.292062	-0.192848	-0.1067	-0.0531262
RAC3	0.340291	0.42158	0.433646	0.564115	0.298431	1.13782	-0.240119	-0.0600356	-0.121623	0.140369	-0.0214129
SNAP25	0.164375	0.673578	0.810408	1.04707	1.14327	1.47337	-0.385997	-0.155388	0.0260688	0.0178717	0.048287
RAP2B	0.134308	0.317642	0.357461	0.163845	-0.255186	0.102907	0.0412497	-0.015397	-0.0109256	-0.186348	-0.0506605
RHOA	0.118738	0.187939	0.116018	-0.210302	-0.254637	0.0170657	-0.593895	-0.162972	-0.254071	-0.0611488	-0.320011
LYZ	0.09981	0.927699	0.0617488	0.775331	-0.543516	0.42539	NA	NA	NA	NA	NA
UFM1	0.32249	0.316284	0.379815	0.349535	0.239381	0.516872	-0.254422	-0.221808	-0.0692442	-0.152592	-0.225964
TIMM10	-0.1132	0.141761	0.0166035	0.208337	0.173229	0.430966	0.123495	0.227734	0.193973	0.0838102	0.11385
PPP1CA	0.0539844	0.0515937	-0.0714423	-0.264814	-0.100288	0.127455	-0.0316252	0.0119512	0.0824005	0.0461634	0.0444524
RPS25	-0.296965	-0.210786	-0.428871	-0.48103	-0.382408	-0.610571	-0.288204	-0.177449	-0.39504	-0.326927	-0.334837
RPL39	0.0817369	-0.0445512	-0.323186	0.0877635	0.120488	-0.177338	0.148107	-0.0349185	-0.0803414	0.0831558	0.093261
RPL10A	-0.19762	-0.0293182	-0.0467411	-0.130236	0.0151873	-0.42265	-0.255149	-0.367724	-0.0327375	-0.128505	-0.0231924
TPM4	0.0793971	0.816699	0.331103	0.566015	1.0549	0.69887	-0.270344	-0.484507	-0.516871	0.120558	-0.278214
UBE2L3	0.0990002	0.220986	0.0821503	-0.0423496	0.100913	0.191283	-0.198288	-0.200835	-0.028379	-0.0428096	-0.0849587
DLG4	0.0394567	0.243612	0.177663	0.203432	-0.0185887	0.497205	NA	NA	NA	NA	NA
PRKDC	-0.281593	-0.55031	-0.518146	-0.630151	-0.553993	-0.952439	-0.0523927	-0.132139	-0.0858648	0.0535339	-0.0337888
IFI35	0.0803529	0.282618	0.329033	0.498943	0.612201	-0.196392	0.0754083	0.267051	0.312809	0.556219	0.19923
BASP1	0.245964	0.380667	0.276842	0.468493	0.489162	1.15802	-0.0273462	0.610761	0.583114	0.565234	0.144511
MRPS22	0.0491467	-0.091791	-0.043547	-0.0306838	-0.0793151	-0.193937	0.143416	0.145337	0.129065	0.0378191	-0.0671665
MRPS35	-0.0289055	-0.00243747	-0.0149604	-0.264305	-0.283481	-0.231446	-0.212881	-0.0233631	-0.0618603	-0.0706641	-0.090228
MRPS11	-0.0799618	-0.277894	0.0128142	-0.227889	-0.234824	-0.293515	0.260021	0.399748	0.245905	-0.0240791	-0.102647
MRPS6	-0.0915673	-0.0614012	0.0242591	-0.101349	-0.321576	-0.315442	0.131404	0.0182917	0.0240246	0.254969	0.0255368
FOXK1	-0.151533	-0.393806	-0.33989	-0.126875	-9.77038e-05	-0.251858	-0.142145	-0.0597739	-0.285059	-0.232537	-0.252409
RPP14	0.309838	0.288463	0.644634	0.320152	-0.0538937	0.889015	0.208052	0.0933245	-0.070043	-0.00637203	0.0146963
CCZ1B	-0.0818434	-0.00042149	-0.0728969	-0.0743607	-0.0432497	0.260434	-0.189681	-0.136657	-0.151607	-0.133469	-0.203671
ATP8B2	0.014016	0.286796	0.35884	0.154184	0.262537	0.590024	0.0617351	0.681877	0.451791	0.11913	0.320346
REEP5	0.181319	0.751198	0.499151	0.694925	0.659707	1.44882	-0.381355	-0.22625	-0.15178	-0.166193	-0.231064
FLI1	-0.474629	-0.886426	-0.486117	-0.419599	-1.41095	-2.48118	NA	NA	NA	NA	NA
IFITM3	0.150561	0.221314	0.297467	0.240845	0.427279	0.107048	-0.216129	-0.132616	-0.27359	-0.158766	-0.366703
ALDH6A1	0.368716	0.764425	0.733259	1.00694	0.951747	1.96424	-0.134047	-0.000511765	-0.079381	-0.0422865	-0.307989
CYP27A1	-0.258015	-0.469822	-0.419081	-0.565227	-0.887182	-1.21149	0.0277227	0.35114	0.235101	0.0133615	0.138375
SP4	0.437308	-0.0235849	-0.302446	0.31179	0.0149609	0.461568	1.01542	1.29706	NA	NA	NA
HIST1H1A	-0.738703	-2.23277	-1.68996	-2.12277	-2.28051	-4.55409	-0.366044	-0.301363	-0.154289	0.270842	-0.0640981
FKBP4	-0.0977502	-0.118716	-0.21234	-0.135037	-0.115535	-0.0952351	0.0633328	-0.0352726	0.17759	0.0402323	0.153505
KMT2A	-0.220852	-0.625978	-0.486089	-0.65856	-0.516213	-0.911263	0.179688	-0.0791488	-0.000901757	0.212766	0.181499
PPARD	-0.395153	-0.935091	-0.687427	-0.651899	-0.458752	-0.486898	NA	NA	NA	NA	NA
CALD1	0.329808	0.922842	0.991291	0.97007	1.12011	1.39949	0.233213	0.0115523	0.462839	0.0292448	-0.21143
FMR1	-0.207449	-0.306024	-0.292907	-0.240559	-0.129164	-0.379972	0.300759	0.15402	0.154019	0.0838515	0.169346
AP1B1	0.153117	0.313894	0.322859	0.350207	0.288755	0.782368	-0.037065	0.15029	-0.0115266	-0.20401	-0.217903
TRO	0.161904	0.143884	0.153888	0.110851	0.00863103	-0.511891	0.0418623	0.170751	0.0223545	-0.0124338	-0.178699
FOXF1	NA	NA	NA	-0.105369	0.0284438	0.407587	0.00630636	-0.121017	-0.125981	NA	NA
FOXL1	NA	NA	NA	-0.539096	-0.474414	-1.35209	0.333995	0.125452	0.510283	NA	NA
NFX1	0.105925	0.0607584	0.0807926	0.0467273	0.183187	0.324966	-0.0376545	0.0412089	0.00958601	0.165764	0.153682
TRIM32	0.304386	0.27959	0.310634	0.202868	0.160643	0.187449	-0.107265	-0.158618	-0.158892	-0.199967	-0.195713
ZBTB17	0.0979131	-0.465007	-0.50224	-0.769588	-0.631101	-0.997127	-0.251718	-0.332643	-0.448074	0.181197	-0.179477
USP4	-0.117419	-0.215535	-0.133438	-0.156046	-0.000182301	-0.0761218	-0.109478	-0.0075482	-0.0366744	-0.00607254	-0.112081
PPFIA1	0.213833	0.327556	0.38335	0.443133	0.404621	0.988434	0.261888	0.365072	0.387437	0.270304	0.271927
CALCOCO2	0.0152102	-0.0166228	-0.1103	-0.37073	-0.468159	-0.633658	0.28839	0.259023	0.128596	0.0279837	0.14415
PAK1	0.307343	0.536996	0.580871	0.717227	0.60587	0.725637	0.219052	0.301036	0.275279	0.203963	0.19523
STX5	-0.00265465	0.0469125	-0.0823095	0.0376929	0.0853102	0.197948	0.0166454	-0.0357653	-0.155544	-0.150412	-0.134437
SEMA3F	0.11678	-0.198761	-0.222783	-0.705846	-0.534412	-0.773408	0.424906	0.396617	0.411997	-0.142959	0.317012
PTPRS	-0.0602977	-0.0764732	-0.046603	-0.36602	-0.222808	0.129822	0.465052	0.643585	0.499871	0.317661	0.361858
PPP2R5C	0.035256	-0.371829	-0.29646	-0.39547	-0.370016	-0.54834	-0.0790814	-0.217251	-0.184187	-0.199778	-0.144894
PLD1	0.13492	0.483558	0.38827	0.328159	0.33098	1.10086	0.073492	0.120371	0.0158622	-0.0704258	-0.101339
PPIG	-0.221709	-0.429005	-0.401881	-0.431396	-0.318463	-0.715908	0.0264167	-0.0264349	-0.011195	-0.0278215	0.00393381
RAB32	-0.0920548	0.245746	-0.10627	0.0571613	0.150037	0.393122	-0.0677733	-0.0196386	-0.282258	-0.29709	-0.206111
MOGS	0.193564	0.267389	0.249979	0.325833	0.470298	0.812493	0.0288455	0.138274	0.0955342	0.113388	0.0269712
LAMB3	0.245142	0.606806	0.501123	0.705563	1.17859	0.898715	-0.41055	-0.578714	-1.22023	NA	NA
HNRNPD	-0.404015	-0.404648	-0.456164	-0.602772	-0.455425	-1.18851	-0.391695	-0.502531	-0.319703	-0.14135	-0.234194
DHX34	-0.251582	-0.551421	-0.518298	-0.752279	-0.765103	-1.36262	0.049823	-0.123721	-0.176475	-0.158655	-0.10007
GIT2	0.139605	0.169833	0.0837184	0.0707415	0.184065	-0.0974996	0.145223	0.0951208	0.0756105	0.184586	0.0864813
ELOA	-0.125316	-0.311493	-0.258014	-0.315236	-0.205253	-0.463848	0.0851837	0.0128699	-0.0100339	0.107957	0.121562
RCN2	-0.0284	0.477911	0.406056	0.450887	0.443348	0.57729	0.191205	-0.0485771	-0.0134685	0.0469826	-0.0442575
SEMA3A	-0.347361	-0.884103	-0.594885	-1.16841	-1.16624	-1.38176	0.460441	0.309998	0.268417	-0.484138	0.0326602
ITPR1	0.444043	0.286752	0.430046	0.593765	0.62261	1.89902	0.108593	0.541219	0.576447	0.0821958	0.0706476
LAGE3	-0.210458	0.0100844	0.0424073	0.0141939	-0.265958	-0.0882442	-0.381615	-0.419218	0.244676	0.349568	-0.126811
TRIP12	-0.154634	-0.210722	-0.217455	-0.188693	-0.130066	-0.531301	-0.0655889	-0.296232	-0.132562	-0.115914	-0.0299785
RRP1B	-0.353823	-0.562742	-0.533966	-0.546408	-0.538697	-1.02495	0.259949	-0.0340787	0.0829508	0.170607	0.169415
NCOA6	-0.687193	-0.396962	0.326824	0.145412	-0.172182	-0.841372	0.529812	-0.0431871	0.577647	0.968768	1.27051
MVP	0.429253	0.782941	0.690045	0.774332	0.752867	1.06178	-0.0220242	0.163244	0.0577854	-0.0673487	-0.00608219
GOLGB1	0.286517	0.390073	0.303198	0.363979	0.417284	0.0642739	0.0594015	0.106586	0.126148	0.17869	0.126075
MTF1	0.267259	0.241269	0.0473338	0.320083	0.338104	0.31041	-0.217214	-0.117925	-0.523869	-0.138944	-0.292303
NFIX	-0.281965	-0.550354	-0.583126	-0.491724	-0.573199	-1.0599	0.248349	0.176307	0.190342	0.33574	0.162717
ZNF638	-0.161397	-0.450707	-0.359008	-0.324287	-0.300878	-0.868513	0.184458	0.11135	0.227905	0.295664	0.207033
NOLC1	NA	NA	NA	NA	NA	NA	NA	NA	NA	NA	NA
CUL7	-0.145411	-0.173629	-0.126718	-0.0826483	-0.0405513	-0.186815	-0.0284361	0.0268308	-0.0534851	-0.106166	-0.284225
UBXN2B	0.0912498	0.148132	-0.286169	0.133706	0.300432	0.275389	0.282313	0.0750554	0.0769549	-0.265188	-0.0640934
MAD2L1BP	-0.312933	-0.0398349	-0.590929	-0.466052	-0.0634109	-0.404333	-0.405506	-0.159151	-0.49506	-0.00451322	-0.0711224
KIF14	-0.540577	-0.975905	-0.752338	-1.02664	-1.00187	-1.98456	0.0365406	-0.0651492	0.124531	0.118425	0.42792
PDIA6	0.0891013	0.19808	0.250214	0.285847	0.298552	0.448587	0.0163142	0.0127954	-0.0180049	-0.0276724	0.00887388
PLCB4	0.382181	0.431839	0.501943	0.562275	0.592808	0.812639	0.133829	0.335145	0.360164	0.230323	0.186073
PPP2R5A	0.0470206	0.154966	0.0904919	0.13791	0.213665	0.141371	0.23967	0.356167	0.303865	0.405723	0.305232
PPP2R5B	0.42698	0.429259	0.415815	0.387696	0.533463	1.03534	-0.288795	-0.0751788	-0.289831	-0.667701	-0.134146
RNPS1	-0.452638	-0.66796	-0.593304	-0.746733	-0.574292	-1.18222	-0.210694	-0.366594	-0.186271	-0.180501	-0.199194
ELOB	0.115789	0.171395	0.178989	0.341567	0.337122	0.655445	0.045051	0.00553825	0.00935253	-0.16276	-0.106068
ANGPT1	0.185038	0.471909	0.459623	0.195076	0.154886	0.154195	0.690795	0.979765	0.956948	0.396282	0.792171
SF3A1	-0.18969	-0.407374	-0.482533	-0.437656	-0.380797	-0.999003	-0.075074	-0.215791	-0.145505	-0.0379745	-0.111676
TESK1	0.233408	0.295678	0.292511	0.26461	0.500461	1.01255	0.13408	0.159633	0.263104	0.304983	0.592373
TARBP2	0.0454582	-0.163658	-0.0188715	-0.0572162	-0.0646625	-0.0447715	0.0161245	-0.15261	-0.0869765	-0.0544338	0.0369563
TRIP10	0.165096	0.325511	0.307756	0.429257	0.465512	0.503317	0.138491	0.0909589	0.209506	0.249948	0.332309
TRIP13	-0.556256	-1.10016	-0.965171	-1.20109	-1.07336	-3.22062	-0.125461	-0.340074	-0.251515	-0.217673	-0.149036
STXBP2	0.370646	0.703143	0.677947	0.701909	0.639008	1.05381	0.125486	0.3966	0.0506533	0.107161	-0.0490153
VPS72	-0.429022	-1.0695	-0.471215	-0.592499	-0.645257	-1.2375	0.841921	0.133489	0.548561	0.789452	0.936565
NRF1	NA	NA	NA	-0.866643	-0.804538	-1.038	-0.387274	-0.258573	-0.166308	NA	NA
NDUFA5	0.133081	0.182062	-0.0156609	0.204162	0.257625	0.609272	0.0316475	0.0359288	-0.0134501	-0.117362	-0.107808
HAGH	0.594221	0.768934	0.718307	0.828788	0.934018	2.11273	0.159969	0.344456	0.25805	-0.012123	0.14319
PFKFB3	-0.171586	-0.292416	-0.20174	-0.330775	-0.417753	-0.335778	-0.0837432	0.0104717	-0.0611004	-0.15437	-0.157905
TXNRD1	-0.0438577	0.466294	0.268919	0.429401	0.575053	1.79072	-0.369449	-0.108599	-0.184872	-0.201894	-0.221247
HNRNPUL2	-0.304745	-0.445402	-0.386214	-0.478235	-0.450022	-0.592238	-0.0672921	-0.0687626	-0.119825	0.0150843	-0.0615583
TMEM44	0.100037	0.242272	0.0394288	-0.095693	0.0136768	-0.0548983	0.48767	0.695058	0.466257	0.601678	0.482846
CTU2	-0.291715	-0.313055	-0.274565	-0.336449	-0.416286	-0.358299	-0.129214	-0.195545	-0.180367	-0.0853575	-0.149289
LRRFIP1	0.207828	0.677217	0.773636	0.81077	0.861635	0.611195	0.112335	0.350071	0.468507	0.573175	0.601453
LRRK1	0.430179	-0.925398	-1.03641	0.511514	0.416375	-0.0633304	0.0726184	-0.911511	-0.457522	-0.31957	-0.544326
TWISTNB	-0.236436	-0.543869	-0.464831	-0.534304	-0.500096	-0.976552	0.019453	-0.116222	-0.110166	-0.188708	-0.124653
KMT5B	-0.171655	-0.489003	-0.0364063	0.144496	-0.0296009	-1.8691	NA	NA	NA	NA	NA
KCTD21	0.377352	0.141895	0.434175	0.399199	0.238807	0.693996	0.102627	0.130366	0.149653	0.135288	0.178748
FILIP1L	0.291094	0.230455	0.221857	0.340866	0.440636	0.544127	0.0477083	-0.293561	-0.0819777	0.109499	0.206112
CCDC58	-0.379763	-0.520126	-0.44875	-0.331999	-0.341395	-0.500756	0.167295	0.0441455	-0.0758386	-0.202645	-0.236185
WDR81	0.0387547	0.203576	0.132033	0.164568	-0.0492651	0.512373	0.149889	0.25179	0.0824071	0.0467799	0.106434
SGO2	-0.297768	-0.783097	-1.09344	-1.18706	-1.14673	-2.00827	0.857661	0.236869	0.752151	0.364366	0.70654
SFT2D3	-0.102743	-0.146138	-0.26848	-0.470017	-0.494674	-0.92279	0.200091	0.181124	0.208412	0.228018	0.200142
DCAF6	0.353511	0.40356	0.39277	0.439297	0.425132	0.514726	0.265817	0.296204	0.256263	0.195502	0.156689
PDZD11	0.00295524	-0.174515	-0.0588175	-0.168728	-0.114546	-0.30744	-0.203647	-0.177888	-0.159133	-0.28509	-0.139561
CARD16	0.472826	0.936684	0.98097	1.161	0.958208	1.89919	0.241835	0.500476	0.416059	0.107439	0.241105
ARSJ	0.112587	-0.0455346	0.0550186	0.00139752	0.239205	-0.0692014	0.160832	0.237057	0.155684	0.143594	0.180697
RABGAP1L	-0.10334	-0.785129	-0.505889	-0.420815	-0.16762	-0.689197	0.697593	0.63321	0.447207	0.50476	0.464259
COX20	0.0186027	-0.29523	-0.240028	-0.46614	-0.428482	-0.642826	-0.0500244	-0.230628	-0.0696759	-0.130681	-0.0720794
TIMM23B	-0.137409	-0.31379	-0.12065	-0.136554	-0.259794	-0.0123229	-0.0205289	-0.0577845	-0.081706	-0.249963	-0.117333
NUP188	-0.426312	-0.692482	-0.60522	-0.690486	-0.666689	-0.833132	-0.0910693	-0.24686	-0.265983	-0.320107	-0.216716
LDLRAP1	0.473122	0.924202	0.699013	1.03133	1.06517	1.7394	-0.0330335	0.146279	0.208885	0.219758	0.267735
ZC3H13	-0.324374	-0.664343	-0.698529	-0.619646	-0.571449	-1.27965	0.194016	-0.121764	-0.0185234	0.13069	0.0696367
ARHGAP21	-0.0172309	0.0881614	0.101137	0.193593	0.149752	-0.0388848	0.297966	0.159687	0.405673	0.423557	0.42899
C9orf64	-0.424951	-0.46209	-0.563441	-0.533564	-1.26649	-1.57625	-0.411251	-0.731701	-0.816332	-0.894838	-0.988663
ZNF618	-0.178276	-0.558338	-0.503883	-0.560281	-0.589762	-0.783943	0.183398	0.0624607	0.0542671	0.147788	0.183317
FAM102A	0.279504	0.550404	0.559343	0.591862	0.247709	0.869537	0.0724147	0.334767	-0.0427662	-0.0861774	-0.0550144
FAM171A1	0.157674	0.164544	0.0515396	-0.147078	-0.198336	-0.0987245	0.0729991	0.167079	0.164351	0.416928	0.472174
RRAGB	-0.0403784	0.363705	0.298516	0.283009	-0.0952348	0.85538	-0.255612	-0.0624136	-0.113927	-0.385044	-0.253449
RNF219	-0.45675	-0.808385	-0.681519	-0.719552	-0.72837	-1.52904	-0.099226	-0.400551	-0.195353	-0.0856638	0.0125139
FBXO31	0.190141	0.589139	0.318741	0.258129	0.431879	0.498012	NA	NA	NA	NA	NA
ANO1	0.59358	-0.177497	0.344938	0.539199	1.40025	1.04495	0.472712	0.629265	0.867374	1.56251	1.30633
WASHC2A	0.240503	0.332903	0.241232	0.249367	0.116968	0.285705	0.327592	0.240885	0.191018	0.124851	0.360956
LPCAT4	0.188948	0.203206	0.253788	0.37196	0.543568	0.699562	-0.0897675	0.0325548	0.145306	0.147355	0.266499
WDR25	0.057285	-0.327308	-0.375756	0.217804	0.163053	0.81752	-0.155395	-0.0326159	-0.580226	-0.395354	-0.571824
STEAP3	-0.198479	-0.0536055	-0.0309116	-0.37178	-0.748549	-0.715835	0.319317	0.333257	0.186743	-0.125759	0.222936
PPP2R2D	-0.254334	1.36795	0.362107	0.216385	0.221573	0.0696065	-1.00317	-0.399191	0.0556344	-0.337961	-0.229836
ATG16L1	0.0654509	0.133184	0.137745	0.211292	0.104553	0.403284	0.144258	0.180948	0.0147205	-0.13367	-0.0383295
HGSNAT	0.277543	1.01828	0.836752	1.00411	0.786137	1.81168	0.224367	0.196678	-0.0411937	0.0433012	-0.218807
ARID2	-0.447544	-0.939503	-0.927416	-0.859791	-0.771321	-1.55892	-0.132415	-0.14826	-0.0554117	0.0391568	0.0792288
FMN1	0.119965	0.140616	0.238143	0.19354	0.3635	-0.202731	-0.124072	-0.278421	-0.241259	-0.514539	-0.105567
INTS3	-0.300485	-0.540865	-0.456009	-0.584892	-0.426085	-0.908346	-0.0964935	-0.103799	-0.0958528	-0.0736403	-0.0207426
TMEM200B	0.0618186	-0.0181273	-0.0966932	-0.813785	-0.586595	-0.453433	0.259789	0.23559	0.169066	0.26274	-0.306605
ZNF787	-0.651955	-1.14413	-0.97003	-1.14357	-0.968125	-1.90101	-0.299287	-0.297234	-0.359911	-0.283412	-0.257315
RAB12	0.0445727	0.297483	0.228303	0.26364	0.119634	0.51959	0.0034319	0.0928438	-0.102533	-0.264338	-0.202807
PDE12	-0.036139	-0.0154557	-0.054	-0.162477	-0.178704	-0.144842	-0.0340859	-0.0832451	-0.0665579	-0.22777	-0.191835
LIN54	-0.80748	-1.10591	-0.968798	-1.07593	-1.23095	-1.72095	-0.0207164	-0.134271	-0.407025	-0.297631	-0.0998845
LRRC8E	0.0697045	0.282188	0.315847	0.159822	-0.0612937	-0.21734	0.163676	0.242901	0.104312	-0.0874538	0.00826971
RHBDD2	0.345477	1.08863	0.668293	0.569992	0.593206	1.49396	0.125624	0.206542	0.0771715	0.127396	0.0690335
RETSAT	0.32574	0.640477	0.606688	0.692779	0.286087	1.43678	0.271941	0.624704	0.44074	0.254596	0.289789
TMEM214	-0.221804	-0.131934	-0.183317	-0.124245	0.0869002	-0.659802	-0.337235	-0.291537	-0.210586	-0.161966	-0.150458
MFSD12	0.273188	0.361934	0.487424	0.481416	0.212841	1.02425	-0.226162	-0.278533	-0.267951	0.068275	-0.10426
ARMC6	-0.038404	-0.0206924	-0.0248125	-0.273697	-0.409887	-0.372133	-0.0198775	-0.106222	-0.10591	-0.161827	-0.131677
PTRF	0.15541	0.456653	0.331228	0.53803	0.64407	0.874001	-0.005363	-0.12865	-0.0690963	-0.131383	-0.250533
FAHD1	-0.0101842	0.352737	0.26167	0.163035	-0.0109669	0.712139	-0.0558266	0.141412	-0.0113229	-0.134425	-0.0212842
INTS5	-0.193947	-0.455474	-0.431957	-0.559924	-0.51615	-0.9043	-0.100993	-0.207915	-0.100805	-0.0352037	-0.0174275
INO80C	-0.35979	-0.749892	-0.640344	-0.732648	-0.770394	-1.12172	NA	NA	NA	NA	NA
FBXO38	-0.0671687	-0.164508	-0.218315	-0.15775	-0.0754942	-0.289368	-0.149113	-0.185118	-0.293778	-0.136803	-0.237738
PAPD4	-0.640681	-0.594081	-0.079238	0.273434	0.100075	-0.534947	-0.531236	-0.377708	-0.461663	-0.657616	-0.637882
WDR59	0.00285996	0.013866	0.0158347	0.0709419	0.149971	0.551257	-0.130726	0.172897	0.132428	NA	NA
LARP1	0.0123188	0.04473	0.0140906	0.00496617	-0.0389834	-0.0819803	-0.039414	0.0261537	0.0387267	-0.0359616	-0.0139734
BLOC1S3	0.0520781	0.163858	0.440031	0.435511	0.199667	0.761061	0.0668003	0.325655	0.50026	0.254332	0.130226
WDR74	-0.101191	-0.454686	-0.415149	-0.307215	-0.124551	-0.526274	-0.0692377	-0.320328	-0.15925	-0.0782753	0.0492632
POTEE	0.113686	0.0513192	0.204593	0.369699	0.212521	0.483377	0.0472041	0.0324668	-0.0948139	0.000961029	0.0425865
NHS	0.168258	0.183081	0.104575	0.172903	-0.026398	0.0658212	0.281724	0.261627	0.395384	0.236479	0.433168
CRTC3	0.130154	0.0937003	0.0207075	0.106439	0.264844	-0.126781	0.409529	0.327009	0.63744	1.09216	0.904167
CSPG4	-0.314658	-0.220324	-0.3229	-0.418134	-0.393109	-0.605631	-0.210341	-0.11882	-0.206144	-0.479487	-0.389958
CCBE1	0.218973	0.323564	0.350687	-0.0329567	0.0687471	-1.03706	0.339184	0.344574	0.419632	0.780355	0.582081
PACS1	0.310797	0.416083	0.440972	0.502105	0.460742	0.963369	0.161133	0.101952	0.151969	0.143441	0.18362
C1orf122	0.257237	0.536432	0.250449	0.205083	0.327661	0.0682751	-0.119027	-0.0183766	-0.103818	NA	NA
TMPPE	0.216954	0.120265	-0.124461	-0.0769719	0.165673	0.444922	-0.326747	-0.166606	-0.254371	-0.370318	-0.213398
SYDE1	0.192825	0.110381	0.0707491	0.107565	0.327182	0.0133282	-0.127222	-0.154932	-0.159788	-0.127198	-0.189399
KCTD8	NA	NA	NA	-0.0566708	0.211885	0.396089	0.165525	0.0693624	0.0525998	NA	NA
VPS13C	-0.0673097	0.0352668	0.0229213	0.0955608	0.0274058	0.71545	0.0864383	0.243384	0.165414	-0.0973806	-0.0177084
LARP4	0.139728	0.0111106	-0.0241047	-0.0279744	-0.0710535	-0.633358	0.220615	0.0600798	0.0535921	-0.0844261	0.00470742
BTN2A1	0.0714111	0.102798	0.0353949	0.0678019	0.158359	0.324506	-0.241485	-0.20631	-0.265137	-0.295963	-0.0415815
TRMT10C	0.0753287	0.196538	0.267931	0.161353	0.0427005	0.307934	0.139213	0.107662	0.118367	-0.00223523	0.0994313
BZW1	-0.245754	-0.407071	-0.393985	-0.31905	-0.358546	-0.537314	-0.105915	-0.276513	-0.334373	-0.356493	-0.387457
CDC37L1	0.640781	0.309722	0.395499	0.65574	0.553299	1.09753	0.539776	0.51398	0.486935	0.324107	0.206852
CYFIP1	0.0663652	0.0946019	0.0850869	0.0541683	0.0620226	-0.0494091	-0.152212	-0.0480751	-0.0787773	-0.037382	-0.00248771
COPS6	0.113664	-0.031862	0.101316	0.0402228	-0.0825547	0.276984	0.0370756	0.0309595	-0.0260315	-0.101158	-0.0448876
LPCAT2	0.30355	0.668249	0.604228	0.59074	0.602804	1.5485	-0.160455	-0.140512	-0.0226866	-0.275952	0.0135126
RAB11FIP2	-0.0823486	0.0939192	0.0780746	0.155496	0.00311215	-0.0850043	-0.192624	-0.174464	-0.251862	-0.370178	-0.312861
DPH6	-0.124311	-0.280251	-0.329571	-0.657505	-0.613817	-0.545352	0.0629271	0.031775	-0.0645621	-0.211097	-0.130785
EEPD1	-0.351258	-0.30523	-0.271	-0.172493	0.141717	0.462457	-0.0484568	0.269839	0.268281	0.740365	0.464921
NRK	0.0405495	0.0404805	-0.0755855	-0.420797	0.0740345	-0.266888	0.0106471	-0.305592	-0.344104	-0.811161	-0.489832
SETX	-0.198649	-0.35858	-0.255032	-0.385222	-0.290278	-0.677754	0.179849	0.0668804	0.207374	0.278905	0.248975
MIER3	-0.426167	-0.532886	-0.481418	-0.445092	-0.653073	-0.883435	-0.00447438	-0.250376	NA	NA	NA
CLASP1	-0.125799	-0.213358	-0.203591	-0.213175	-0.0428995	0.0456291	-0.0737409	-0.112366	-0.0392779	-0.0234754	0.0486543
HAUS6	-0.181391	-0.810144	-0.682158	-0.794414	-0.88171	-1.54179	0.174865	-0.155396	-0.0491587	-0.0798094	0.165578
WAPL	-0.257609	-0.682964	-0.494518	-0.649203	-0.529745	-1.27423	0.270944	0.0220025	0.233833	0.341088	0.364553
KIAA0907	-0.35099	-0.62159	-0.593849	-0.625739	-0.542256	-1.0905	0.0141741	0.0192959	0.0724183	0.0210867	0.0189527
ZBTB33	-0.0244686	-0.161017	-0.249826	-0.330524	-0.285414	-0.58064	0.194741	-0.00514273	0.264351	0.392243	0.443207
ALPK2	0.8266	0.913687	0.618681	0.878773	1.24661	1.13297	0.0375465	-0.0234365	0.140424	0.85873	0.05618
MYPN	0.434238	0.664608	0.544291	0.452582	0.49042	0.018476	-0.0824664	-0.156485	0.0966909	0.277218	0.582915
LDB1	-0.00339834	-0.396925	-0.452516	-0.464797	-0.386023	-0.505991	-0.194118	-0.0536856	0.0320386	0.323556	0.0604975
SLC9B2	0.0692603	0.330841	0.229413	0.329132	0.206907	0.577798	0.0985604	0.507215	0.108952	-0.262214	-0.0706323
MAGI2	0.0468839	0.138719	0.0478414	0.0157396	0.259607	0.0438394	-0.0782833	0.05691	0.134472	0.0405127	0.182408
BCL9L	0.156717	-0.0478111	-0.101483	-0.26901	0.000340993	-0.920425	0.180145	0.0762519	0.251794	0.361136	0.302784
GPR180	0.0325682	-0.166616	-0.00358533	-0.0357644	-0.00303821	-0.00219781	-0.0763409	0.0672036	0.0464726	-0.121388	-0.118088
TSPYL5	-0.143406	-0.520064	-0.546045	-0.565667	-0.333756	-1.16291	-0.00877545	-0.414548	-0.517362	-0.889985	-1.45872
NLRP10	0.726835	0.749039	0.874602	0.965957	1.37565	0.54282	-0.0257364	-0.427537	-0.412322	-0.256677	-0.255951
THOC6	-0.342889	-0.72227	-0.520126	-0.69775	-0.694589	-1.08257	-0.0153854	-0.219884	-0.0723733	0.0313422	-0.0613024
SBF2	0.0172244	0.0492348	-0.0171471	0.0591607	0.0485143	0.385824	0.172509	0.269461	0.307379	0.395667	0.340105
FCHSD1	0.340387	0.580947	0.47825	0.5365	0.625919	0.607224	-0.0597001	-0.0266578	0.00586714	0.0722502	0.0326049
CHSY1	0.0885633	-0.0201182	0.0777178	-0.0993091	-0.129823	-0.306916	0.0608248	-0.0956156	-0.00580821	0.163978	-0.00961151
DDX42	-0.291309	-0.498605	-0.447706	-0.488327	-0.471708	-0.921528	0.0216298	-0.114743	-0.117157	0.0125891	-0.0412972
CEP57	-0.441146	-0.713039	-0.866938	-0.906183	-0.790829	-0.937155	-0.237204	-0.447725	-0.27483	-0.120759	-0.431823
XYLT1	0.0273168	-0.138235	-0.172903	-0.306689	-0.42835	-0.742857	-0.0630258	0.0634442	-0.0985861	-0.119269	-0.148457
PDSS2	-0.0838466	0.0325458	0.0263467	-0.0158206	-0.143137	-0.113502	-0.11533	-0.069825	-0.208699	-0.176689	-0.328679
HPS6	0.0418783	0.116391	0.0452391	0.0870411	0.0773817	0.317412	0.187607	0.0461743	0.249028	-0.0292374	0.0428815
RNF135	0.143416	0.437944	0.306621	0.304353	0.232493	-0.0834257	-0.0622285	0.0431735	0.255347	0.4536	0.443394
MINA	-0.379706	-0.42875	-0.470457	-0.573613	-0.897549	-1.33272	0.13321	-0.181537	-0.0246686	0.408873	0.111495
P3H3	0.220362	0.214732	0.300925	0.297077	0.504328	0.30511	-0.280621	-0.338692	-0.157394	0.0382916	-0.00921501
CEP97	-0.379075	-0.622294	-0.613484	-0.601591	-0.518565	-1.00177	0.182297	-0.111832	0.0646441	0.0318008	0.237732
LMTK2	0.257005	0.331233	0.24324	-0.185451	-0.110357	0.163675	-0.268365	0.443302	-0.00279403	-0.284584	-0.014257
UBR2	0.117715	-0.0422326	0.0194974	0.0779183	0.193088	0.235297	0.144176	0.130394	0.107331	0.10877	0.04517
DHX40	-0.128111	-0.484879	-0.389659	-0.415671	-0.23439	-0.928499	-0.624128	-0.584147	-0.495566	-0.335692	-0.0675206
ASXL1	-0.174024	-0.222779	-0.430998	-0.413399	-0.265159	-0.895169	0.348616	-0.358752	NA	NA	NA
DHX37	-0.26842	-0.595981	-0.483592	-0.72126	-0.633783	-1.38458	-0.0828615	-0.165597	-0.0679915	-0.114452	-0.0284461
KBTBD2	-0.0750639	-0.433484	-0.262348	-0.0410554	-0.146165	0.0551326	0.0956077	0.0904131	-0.200773	-0.253047	-0.106906
TMEM192	0.360074	0.601058	0.454382	0.309296	-0.042861	0.938068	-0.0642048	0.109551	0.25154	-0.0132562	0.0236517
DIS3L2	-0.0113076	-0.147612	-0.2303	-0.135667	-0.0676481	-0.298099	0.154791	0.0670667	0.0342571	0.12967	0.0476666
KIAA2013	-0.0192122	0.0202497	0.0206218	0.0622843	0.108368	0.171788	0.00601959	0.0278381	-0.124894	-0.376315	-0.260727
HACE1	-0.0866958	-0.0555427	-0.0432678	-0.0228962	0.00634357	0.309066	-0.0497504	-0.0237006	0.00440322	-0.0503075	-0.0431877
PHACTR4	0.0450543	0.0235795	0.0492045	0.092842	0.0795379	-0.010522	0.0765954	0.0263565	-0.130744	0.18196	-0.183106
DCP1B	-0.0754735	-0.225451	-0.242426	-0.218592	-0.166033	-0.304553	0.148875	0.136965	0.0896962	0.138905	0.0204445
XRN1	-0.0100791	-0.143783	-0.166483	-0.125548	0.0198762	-0.187921	-0.0350219	-0.0302725	-0.00686956	0.0426405	0.0498375
SYS1	0.0120329	0.155633	0.0538373	-0.131773	0.0586413	-0.116405	-0.25943	-0.0693966	-0.0546778	-0.21567	-0.212099
MICALL1	0.272739	0.174436	0.0823207	0.218545	0.564274	0.287751	-0.0040065	-0.193176	-0.0221675	-0.0557195	0.0267511
VPS8	0.0798	0.143498	0.18372	0.196869	0.0882016	0.618161	0.0247309	0.191122	0.120335	-0.0795549	-0.0894811
PNKD	-0.0155377	-0.181843	-0.295658	0.0239898	-0.181962	-0.116463	-0.0649749	-0.103075	-0.106094	-0.0277525	-0.0516547
MINK1	0.513187	0.630338	0.471196	0.726876	0.686876	1.29057	0.21969	0.343903	0.151593	0.212188	0.129869
FBXL6	-0.751637	-1.63434	-1.05361	-1.16239	-0.924354	-1.15239	NA	NA	NA	NA	NA
OGFOD1	-0.207069	-0.443447	-0.406697	-0.491364	-0.349919	-0.847867	-0.110366	-0.532071	-0.488538	-0.469498	-0.204707
CISD2	0.0470803	-0.223763	-0.127352	-0.170264	-0.0387271	-0.0521834	-0.0488435	-0.129083	0.0550372	-0.0585025	0.179196
UBR7	-0.64551	-1.14809	-1.04027	-0.927847	-0.935026	-1.86495	0.241845	-0.239228	-0.0405712	0.0849223	0.0577008
RNF152	0.0100431	-0.237946	-0.0169434	-0.422589	-0.949567	-0.409306	NA	NA	NA	NA	NA
C2orf69	-0.187817	-0.47275	-0.260571	-0.712014	-0.689548	-0.596853	0.013556	0.124708	-0.00556538	0.121624	0.226545
PRPF38A	-0.375702	-0.789173	-0.619866	-0.670626	-0.563096	-1.11127	0.0466558	-0.0270332	0.0677414	0.0992559	0.0218643
MFSD9	0.101538	0.293767	0.495849	0.337778	0.1662	0.472335	NA	NA	NA	NA	NA
HSD17B11	0.109726	0.244	0.320799	0.384039	0.441662	1.18579	0.0457136	0.277689	0.189528	0.133443	0.135538
KCTD6	-0.598994	-0.639805	-0.482122	-0.885097	-0.976152	-2.12231	0.131612	-0.306623	-0.0617651	-0.0333782	-0.0333644
LRRN4CL	0.852089	0.672606	0.777142	0.910459	0.99812	0.0896742	0.387969	0.892135	-0.128944	0.0185823	0.174442
MROH1	0.311279	0.464237	0.590657	0.49011	0.219283	1.48098	0.326819	0.592223	0.308208	0.0361679	0.234436
PAPD5	-0.398761	-0.645582	-0.463527	-0.570058	-0.591016	-1.06653	0.186393	0.00831102	0.011666	-0.0661484	0.0375625
EHBP1	0.0469014	-0.0583059	-0.0352674	-0.00561039	0.0940624	-0.0398024	0.18337	0.123891	0.17836	0.214649	0.144466
APPL2	0.243862	0.294023	0.336147	0.398091	0.601489	0.76968	0.0387048	0.179391	0.132936	0.222493	0.205908
TNIP2	-0.229487	-0.324125	-0.309821	-0.41359	-0.41446	-1.07655	0.0489979	-0.0922756	-0.0843358	NA	NA
TTL	-0.00759763	-0.0900645	-0.00306623	0.0155149	-0.0283776	0.332142	-0.170369	-0.246926	-0.253618	-0.315922	-0.268835
KDM2B	-0.123814	-0.758236	-0.568398	-0.740317	-0.567036	-0.875973	-0.322364	-0.280165	-0.391315	-0.231094	-0.569781
DDX55	-0.180866	-0.468436	-0.643581	-0.78489	-0.640476	-0.985062	-0.467446	-0.285511	-0.372408	-0.282377	-0.0912772
NEDD1	-0.250899	-0.464004	-0.412496	-0.448315	-0.396556	-1.16033	0.208691	-0.0284284	0.106301	0.146666	0.256498
NPLOC4	0.192843	0.158715	0.189162	0.183296	0.177665	0.44658	0.0431401	0.175952	0.172115	0.140825	0.143621
SPATA20	0.113936	0.451986	0.463013	0.644288	0.626103	1.54992	0.0913991	0.31707	-0.0321793	-0.234715	-0.252766
NANP	0.138775	-0.137329	-0.179578	-0.0684053	-0.320897	-0.29633	0.426204	0.281027	0.178894	0.00870649	-0.142907
PIGX	0.18003	-0.156397	0.248149	0.0418011	-0.156431	0.410393	-0.438179	-0.100916	NA	NA	NA
TBC1D16	0.303548	-0.139558	-0.0398607	0.0464254	0.190062	0.237031	0.419444	0.642304	0.811026	0.792709	0.779864
TBC1D15	-0.0670473	-0.135865	-0.0503417	-0.13731	-0.0876937	0.108391	0.014143	-0.0157615	-0.145586	-0.239977	-0.186151
ZFAND1	-0.082174	-0.152731	0.00619024	-0.0900922	-0.183748	-0.519909	-0.103184	0.0338528	-0.197348	-0.315232	-0.346578
HM13	0.59089	0.450932	0.569454	0.498385	0.387856	1.38465	0.142889	0.310028	0.222478	0.0152096	0.209931
MIPOL1	-0.323116	-0.528405	-0.559103	-0.723848	-0.696574	-0.758438	NA	NA	NA	NA	NA
BICD2	-0.040611	-0.00464151	-0.00478696	-0.0218672	-0.00746672	-0.0899374	-0.0962999	-0.165538	-0.106525	-0.137129	-0.0939774
GPT2	0.0204586	-0.0708922	-0.0493381	-0.288513	-0.666753	-0.574146	-0.00334779	0.0672663	-0.0466439	0.0842862	-0.0819468
TRAF3IP1	0.0591135	-0.15317	0.100691	0.0365299	0.140357	0.000883098	0.603905	0.65753	0.683898	0.551905	0.436134
FAT3	0.0514191	-0.12787	0.00440116	-0.140622	-0.0752647	-0.000379421	0.28704	0.204193	0.126982	0.148717	0.290015
NPRL2	-0.192274	-0.023089	-0.217194	-0.123156	-0.243179	0.271483	-0.110117	-0.343289	-0.230575	-0.33883	0.0774362
CHPT1	-0.0828897	0.281268	0.15868	0.124937	0.0567818	0.36117	-0.103706	-0.0528594	-0.176039	-0.422175	-0.227096
HEXDC	0.231572	0.473275	0.626043	0.651208	0.803627	1.4987	0.253899	0.384351	0.434595	0.655441	0.566209
RNF141	-0.16631	-0.294739	1.02011	1.02055	0.0760943	0.277317	-0.16374	0.12783	NA	NA	NA
OSCP1	0.347283	0.717209	0.610159	0.607928	0.522655	1.31106	0.0882198	0.275796	0.127865	-0.151037	-0.218119
ANKRD49	0.0408457	0.161066	0.181089	-0.471824	0.302204	-0.0236123	NA	NA	NA	NA	NA
WDR60	0.116877	-0.0334751	0.105519	0.281101	0.247942	0.0668369	0.0819013	-0.0779886	-0.532348	NA	NA
CKAP2	-0.860871	-1.44437	-1.26106	-1.44978	-1.55291	-2.67789	0.0338211	-0.47202	-0.311596	-0.472618	0.0976506
PALLD	0.494026	0.831281	0.733757	0.8865	1.07586	1.44161	-0.029233	0.112485	0.122162	0.318361	0.141824
RUFY2	0.213341	0.336636	0.355083	0.289018	0.310236	0.627529	-0.0289653	-0.00927071	0.00334218	0.0694712	0.161084
MADD	0.202537	0.19767	0.103051	0.294193	0.40418	0.620505	-0.0262943	0.0564235	0.101779	0.204491	0.191832
PIBF1	-0.0948345	-0.284976	-0.302345	-0.265323	-0.198209	-0.474309	-0.0399699	-0.0079209	-0.0700141	-0.0331365	0.0185568
BRI3BP	0.0717578	-0.231089	-0.166221	-0.374164	-0.15773	-0.082055	-0.21779	-0.435383	0.024131	-0.183472	-0.251554
SSH1	0.400708	0.604982	0.534618	0.720933	0.776483	0.830636	-0.0395285	0.0820782	0.206588	0.336582	0.185165
RFFL	-0.0646615	-1.15549	-0.348983	-0.385532	-0.0428117	-0.64646	0.274697	0.512722	-0.0950716	-0.367294	-0.0971386
DDX1	0.0190277	0.050532	0.0590049	0.0136506	-0.0440438	0.119739	-0.000622079	-0.0151488	-0.0481901	-0.102359	-0.120125
RGP1	-0.0688109	0.13297	0.194569	0.031391	0.238973	-0.0388788	0.546396	0.223998	0.287653	0.272567	0.416195
WASF1	0.562667	0.454202	0.465445	0.249774	0.278676	0.123933	-0.114887	-0.148095	0.0444491	0.335061	0.0732798
NDRG1	0.0505294	0.289652	0.354421	0.564666	0.433177	2.07783	0.36773	0.772112	0.599297	0.324001	0.399516
EDEM1	-0.066745	-0.359382	-0.338418	-0.492699	-0.90629	-0.727174	0.411018	0.0474995	-0.0317684	0.123903	0.0792519
PIGK	0.0470713	-0.050816	0.110086	0.155408	0.150842	0.690322	0.245204	0.306881	0.161554	0.119548	0.0956567
STAM	0.0183376	0.213705	0.215635	0.0956074	0.0209627	0.450598	0.287477	0.29988	0.294409	0.125783	0.287898
CREBBP	-0.367784	-0.767909	-0.752636	-0.842815	-0.632715	-1.53295	0.0501516	-0.0720718	0.000517269	0.214087	0.151427
RAB8B	-0.123653	-0.0284922	0.0526771	0.0538791	0.171372	0.498518	0.216188	0.11828	0.119562	-0.111625	0.0249579
EMG1	-0.461433	-0.823349	-0.698486	-0.872275	-0.879793	-1.49956	0.0352719	-0.209154	-0.109613	-0.069427	-0.0240926
MR1	-0.958933	0.147335	-0.254577	-0.340977	-0.238045	-0.571798	NA	NA	NA	NA	NA
HPS3	0.0346453	-0.105431	-0.0278232	-0.165119	-0.323857	0.0036794	0.0144497	0.165437	0.0811236	-0.0118692	0.0537279
SMARCE1	-0.402792	-0.858422	-0.874911	-0.786701	-0.647956	-1.13866	0.320757	0.13069	0.0449844	0.264962	0.207196
NXPE3	0.175253	0.553292	0.583845	0.405528	0.277382	0.280497	0.062283	0.152507	0.0050341	-0.341583	-0.397429
PPP1R14A	0.576943	1.15217	1.18162	1.76422	0.997846	-0.204706	0.333798	-1.25319	-0.525235	-0.376916	-0.523003
CCDC47	-0.0597135	-0.0320082	-0.00172797	-0.0160734	-0.0442902	0.103572	0.00380108	0.0277488	-0.0603717	-0.084396	-0.0124239
KIAA1143	-0.24023	-0.187591	-0.414768	-0.289559	-0.154787	-0.63798	0.0850669	-0.252421	0.0949812	0.380774	0.35506
COA7	-0.254885	-0.443215	-0.320699	-0.395986	-0.69391	-0.812053	0.0215042	0.186805	0.150656	0.165941	0.0556234
TMCO6	NA	NA	NA	-0.145613	0.0169734	-0.612702	-0.358932	-0.573063	-0.392985	NA	NA
SEH1L	-0.262991	-0.490774	-0.48593	-0.48494	-0.382721	-0.485275	0.0428432	-0.0634806	-0.0417913	-0.0105461	-0.014062
FBXO17	NA	NA	NA	-0.331793	-0.37444	0.00217224	-0.367376	-0.572266	-0.719314	NA	NA
TCEAL4	-0.00917014	0.0321202	0.0104127	0.0798589	-0.000590044	-0.162782	0.117888	0.0434307	-0.0454541	-0.0971395	0.00847597
L3HYPDH	0.282199	0.215295	0.266686	0.217386	0.307754	0.0605452	-0.115248	-0.0520014	-0.0811055	0.00833863	-0.0731742
RNFT2	0.213372	-0.777687	-0.796866	-1.44932	-1.18729	-1.76809	0.26782	-0.307004	NA	NA	NA
SAT2	-0.187658	0.232602	0.0808102	0.254217	0.289892	0.121385	-0.162804	0.0810967	-0.0513812	0.0725197	0.181607
MASTL	-0.907622	-1.5659	-1.3464	-1.20068	-1.15647	-2.50514	-0.135475	-0.419981	-0.21402	-0.180072	0.119468
ZC2HC1A	-0.153973	-0.230956	-0.274707	-0.31675	-0.264718	-0.547853	-0.1217	-0.065457	0.00110144	0.0709374	0.0928897
RBM18	NA	NA	NA	0.214008	0.340839	0.198884	-0.331063	-0.363754	-0.356288	NA	NA
ZNF414	NA	NA	NA	-0.363745	0.0220187	-0.259773	-0.309446	-0.242619	-0.293615	NA	NA
ZNF845	0.352814	0.0407094	-0.0453736	0.103549	0.209062	0.0738117	-0.371727	-0.11114	-0.0863298	-0.163033	-0.343487
VPS39	0.183844	0.3084	0.298206	0.327982	0.122956	0.856746	0.0108448	0.156703	0.0263588	-0.106575	-0.0184493
EAF1	0.0878851	-0.000157156	0.00313119	0.0234633	0.149758	-0.233192	0.0139072	-0.183849	0.0500175	-0.044632	0.380821
SERAC1	0.525273	0.238978	0.321233	0.413186	0.564433	1.82333	0.348019	0.400633	0.391944	0.0400257	0.318932
EP400	-0.402936	-0.696671	-0.625262	-0.697642	-0.62924	-1.01716	0.00706657	-0.167706	-0.0409705	0.049503	0.124342
UBE2E2	-0.346039	-0.0756655	-0.122681	-0.0863462	-0.180884	-0.910191	1.10026	0.334469	0.644793	0.704864	0.263106
PRRC1	0.244153	0.167591	0.180541	0.208019	0.261418	0.0998648	-0.0630251	0.0499069	0.0450846	0.0532069	-0.0179471
MFSD14A	-0.0940579	0.0669138	-0.00755337	-0.201908	-0.25402	-0.290155	0.148259	0.229944	-0.196497	-0.429376	-0.080987
NSMCE3	-0.427718	-0.777529	-0.794585	-0.93513	-0.913437	-1.45963	-0.116867	-0.217606	-0.173729	-0.0389455	-0.0286767
TTC14	NA	NA	NA	NA	NA	NA	NA	NA	NA	NA	NA
PWWP2A	-0.388624	-0.981344	-0.708983	-0.944862	-0.829497	-1.37337	-0.0619132	-0.259358	0.0155489	0.139707	-0.0374289
ZNF830	-0.299702	-0.601721	-0.439537	-0.445615	-0.388085	-1.14002	0.298114	-0.0372018	0.20543	0.407866	0.366073
RPRD1A	-0.220372	-0.479017	-0.444772	-0.555098	-0.442648	-1.14163	-0.162739	-0.218826	-0.146824	-0.117913	-0.184682
ARAP1	0.00502879	0.0438982	0.0400326	-0.0401538	-0.0728409	-0.00641668	-0.0313186	0.0342599	-0.0243149	-0.106294	-0.0243226
ACAP3	0.275583	0.0882468	0.150017	0.15601	0.178461	0.356663	0.0605152	0.230901	0.167418	0.152308	0.283583
ZNF385A	-0.133035	-0.629289	-0.279843	-0.394967	-0.244247	-0.505336	0.108138	0.143891	NA	NA	NA
NEDD4L	0.447876	0.641804	0.581962	0.557149	0.607922	0.692118	-0.0597741	-0.0362993	-0.11068	-0.128207	-0.0903071
ALS2	0.0800473	0.13771	0.237732	0.330757	0.109654	0.559541	0.0811538	0.206502	0.270719	-0.0275051	0.0939334
SNX18	0.217973	0.261245	0.393274	0.572932	0.55762	0.581159	0.204828	0.424919	0.49002	0.588195	0.575037
RAB40C	-0.20439	-0.430924	-0.286505	-1.13724	-0.577243	-0.188469	0.0555268	0.696973	-0.309502	-0.381089	-0.241309
RPS6KC1	0.137534	0.208257	0.213061	0.325906	0.438563	0.567739	0.153545	0.23614	0.152643	0.11969	0.101418
CLCC1	0.305656	0.477557	0.532442	0.588148	0.799382	1.08891	-0.0768665	-0.0737613	-0.1333	-0.10297	-0.177956
SIN3A	-0.471661	-0.793628	-0.737692	-0.792982	-0.76009	-1.47737	-0.0386555	-0.236002	-0.128065	0.0863634	0.0183063
MMS19	-0.139132	0.0504219	-0.0726728	-0.0612837	-0.0614003	-0.00959661	-0.116279	-0.0628775	0.0813479	0.127835	0.143542
RMDN3	0.0466339	0.204672	0.22262	0.416891	0.199541	1.28009	-0.0511921	0.0169221	-0.0916036	-0.236224	-0.22041
PCYT2	0.341424	0.558228	0.683894	0.854226	0.587989	1.29241	0.536276	0.728365	0.53413	0.281768	0.413215
EYA3	-0.450214	-0.536771	-0.654698	-0.672812	-0.566265	-1.1385	0.00764304	-0.155893	-0.168223	-0.0520643	-0.13152
VAT1	0.325048	0.813696	0.695253	0.916852	0.620171	1.73128	0.0104118	0.243148	0.15128	-0.16987	0.0485867
P2RX4	-0.002813	0.321221	0.413185	0.38468	0.163876	1.40796	-0.0632203	0.30208	0.118475	-0.000194119	0.24375
SCAF11	0.0300193	-0.37994	-0.189966	-0.102625	0.136615	-0.361145	0.251946	0.0267838	0.131725	0.0694599	0.190858
PHB2	-0.172442	-0.0949662	-0.127619	-0.149917	-0.153397	0.20915	-0.119308	-0.048189	-0.0322289	-0.152575	-0.176767
COQ7	0.343014	0.0619806	0.0620764	0.0941117	-0.209323	0.576864	0.0214772	-0.0201347	-0.191441	-0.178702	-0.210723
HSD17B14	-0.112168	0.974742	0.621403	0.34441	0.401281	0.875262	0.283615	0.578143	0.539343	-0.229445	0.442654
CMSS1	-0.469394	-0.82345	-0.871114	-1.00075	-1.20869	-1.73356	-0.0191119	-0.429392	-0.485053	-0.203541	-0.21368
VKORC1	0.254533	0.602728	0.539335	0.592667	0.659487	1.35294	0.00918824	0.0761948	-0.0405142	0.114873	0.197189
DPH2	0.273433	0.144308	0.229916	0.0629106	0.157264	0.161033	-0.00389558	-0.0849086	0.0722178	0.0712393	-0.0170488
SELENOS	0.104919	-0.208277	-0.187602	-0.249375	0.0672841	0.0230614	-0.240665	-0.426639	-0.238394	-0.0930028	-0.0719506
LPIN3	0.0529107	0.156125	-0.0862002	-0.187081	0.345032	0.175423	0.170628	0.4036	0.398299	0.296223	0.0533173
CORO1B	0.270758	0.789688	0.682734	0.776375	0.784434	0.811577	-0.141859	-0.00459888	0.0574621	0.0477367	0.0975556
LZTS2	0.0407395	-0.00265049	-0.131336	-0.158566	-0.128557	-0.276613	-0.0270447	-0.000916437	-0.0298129	-0.0936685	0.179335
UQCC2	0.092981	0.0979083	0.140205	0.197001	0.110077	0.778725	0.164782	0.212205	0.172262	-0.078892	-0.249126
GINS4	-0.989469	-1.76567	-1.34571	-1.44184	-1.61387	-3.16903	-0.157451	-0.615597	-0.395239	-0.150084	-0.124855
SIKE1	0.0391143	0.542072	-0.142615	0.08944	0.314141	0.239168	0.200589	0.191129	0.156771	0.17339	0.238471
WDR83	-0.400099	-0.726884	-0.637605	-0.836986	-0.626866	-1.49557	-0.105048	-0.389255	-0.169491	0.0716081	-0.0348448
C16orf70	0.24832	0.405332	0.575813	0.543029	0.53883	1.26734	-0.239998	-0.0780959	-0.163696	0.0917462	0.112056
FAM103A1	0.0645567	-0.0272665	-0.113833	0.18032	0.337338	0.287466	0.257138	0.458859	0.168118	0.12434	-0.043674
MSTO1	0.0628679	0.151581	-0.15743	-0.0664283	-0.0920968	-0.316757	-0.000232088	-0.153545	-0.130297	-0.0205853	-0.0680272
PDCD10	0.185978	0.0465765	0.0926614	0.098308	0.0940575	0.363503	0.0690625	0.182187	0.114791	-0.0585536	-0.0469256
SLC25A23	NA	NA	NA	NA	NA	NA	NA	NA	NA	NA	NA
RNF126	0.027625	0.0940276	0.0579358	0.138971	0.0810384	-0.362912	-0.108073	-0.0955964	-0.0978088	0.0678245	-0.0241729
KATNB1	0.211279	0.311607	0.307452	0.415431	0.361541	1.06155	0.000348851	0.0156904	-0.16589	-0.186251	-0.178863
TUBB2B	NA	NA	NA	0.0321609	1.52296	1.02232	-1.00192	-2.00183	-2.45546	NA	NA
TMEM109	-0.268544	-0.266625	-0.251111	-0.192978	-0.313402	-0.0520089	0.208372	0.115441	0.134707	0.111934	0.0292577
SPATA5L1	-0.319186	-0.577734	-0.463204	-0.490812	-0.421816	-0.549588	-0.0607394	-0.147503	-0.0453886	-0.0252206	-0.0591035
DDA1	0.19798	0.054167	0.227677	0.249314	0.307576	0.48797	0.276089	0.24779	0.291993	0.0786633	0.310341
CCDC94	-0.321415	-0.767287	-0.835054	-0.930921	-0.8634	-1.87002	0.119924	-0.113303	-0.000716373	0.122778	0.116755
RBM4	-0.234128	-0.645746	-0.601707	-0.61771	-0.581337	-1.253	0.0256841	-0.0883233	-0.130735	-0.0242996	-0.152766
MND1	-0.42617	-1.26688	-1.00473	-1.12496	-1.14241	-1.16531	0.301009	-0.125404	0.0297379	-0.155548	0.0503242
BRIP1	-0.543178	-1.16965	-1.02978	-1.19083	-1.29325	-2.53794	-0.312277	-0.592497	-0.515929	-0.324258	-0.29254
HINT2	-0.117083	0.23896	0.0168929	0.0188408	-0.173836	0.655721	-0.0427726	-0.13539	-0.294296	-0.289496	-0.574977
NUSAP1	-0.778572	-1.48037	-1.22481	-1.25773	-1.22528	-2.36006	-0.183568	-0.562266	-0.343802	-0.37364	-0.0832513
DGCR6L	-0.140821	-0.185253	-0.270562	-0.403807	-0.421713	-0.782316	0.194045	0.0064509	-0.0767425	0.059789	0.104159
HDAC8	0.205816	-0.118827	-0.116414	-0.0365141	0.0435541	0.029613	-0.326223	-0.166377	-0.14477	-0.0602801	-0.11887
POLDIP3	-0.452481	-0.938059	-0.856628	-0.656829	-0.797324	-1.56949	0.972866	0.451595	0.606537	1.09722	0.733346
GNB1L	-0.296185	-0.433872	-0.418443	-0.527986	-0.362383	-0.251139	-0.134187	-0.136872	-0.257431	-0.151297	0.0222943
MRPL20	-0.0503703	-0.0368972	-0.00760563	-0.0437836	-0.147273	-0.129891	0.110392	-0.0418503	-0.0685051	-0.0200892	0.00350453
MRPL4	-0.0531537	-0.019693	-0.12115	-0.0473913	-0.0995487	-0.248514	-0.0368185	-0.0129361	-0.00852076	-0.101133	-0.129421
SETD2	-0.392561	-0.624618	-0.550012	-0.495618	-0.430287	-0.999368	0.12283	-0.121859	0.120877	0.159861	0.11102
TBC1D2	0.308121	0.571219	0.553732	0.641976	0.417879	0.741377	-0.0443779	0.0940118	-0.135371	-0.263104	-0.266833
NUF2	-0.681541	-1.46229	-0.97403	-1.45778	-1.44356	-3.67677	-0.122973	-0.384238	-0.173635	0.0265336	0.158005
ASPSCR1	0.084933	0.18563	0.176606	0.1549	0.113481	0.276374	0.00400134	0.049463	0.103348	0.139878	0.18663
OSBPL6	-0.367524	-0.344588	-0.279123	-0.372269	-0.346607	-0.618647	-0.33898	-0.113068	0.000349048	-0.116663	0.179943
PPP1R12C	0.612566	1.10253	0.948638	1.18673	1.22599	2.0546	0.120746	0.313501	0.329433	0.316535	0.240536
TRIM5	0.0956642	0.174666	0.134908	0.0480167	0.241279	0.0479428	0.134069	0.0662987	0.156908	0.214602	0.151806
ZDHHC5	0.219169	0.41565	0.411493	0.454135	0.446466	0.709519	0.0610478	0.0980452	0.0802139	0.0904538	0.0985008
UBE2O	-0.0210761	-0.0960931	0.0121153	-0.0386026	-0.0157684	-0.0496885	0.152265	0.186933	0.250693	0.248661	0.336853
ZNF518B	1.11871	0.750389	2.27776	1.57264	0.779436	2.34453	NA	NA	NA	NA	NA
ZC3H12C	0.0196266	-0.273804	-0.0246584	0.028127	0.0698805	-0.0448494	0.0102887	-0.283081	-0.307738	-0.417141	-0.0712735
ZNF407	-0.15607	0.385241	-0.434823	-0.30319	-0.00989791	-0.161801	0.0444953	-0.0585952	-0.0745589	-0.497406	0.373933
NIF3L1	-0.324948	-0.203004	0.0405425	-0.14911	-0.495972	-0.469843	NA	NA	NA	NA	NA
LSG1	-0.0464704	-0.0818569	-0.1366	-0.133104	-0.251232	-0.37571	-0.0422287	-0.0690414	-0.132346	-0.210418	-0.1149
NAT10	-0.350363	-0.558464	-0.579595	-0.594299	-0.615047	-1.16313	0.0602438	-0.0661409	-0.117443	-0.179255	-0.201784
KLC2	-0.0180175	0.018691	-0.0198419	0.0384313	0.030093	0.0748069	-0.0721366	-0.171882	-0.0754756	0.00219168	0.124042
SAP130	-0.364693	-0.682543	-0.568273	-0.551702	-0.590781	-1.0492	-0.0873252	-0.228367	-0.138113	0.00661302	-0.0693839
CCDC8	0.353058	-0.279377	-0.688659	-0.749299	-1.98053	-3.02086	0.99522	0.633575	0.586542	0.947742	0.0699117
ANAPC1	-0.135321	-0.198421	-0.286864	-0.348736	-0.408769	-0.325359	0.0171112	-0.0687511	-0.0464146	-0.0267743	-0.100094
UPF3A	0.00568935	-0.299559	-0.269724	-0.163194	0.0404735	-0.0432684	0.273089	0.059985	0.138483	0.426707	0.303777
DNAJC25	-0.193043	0.0682779	-0.0437104	-0.162565	-0.501055	0.106488	0.0989014	0.463537	0.374321	0.129107	0.0698588
TAOK3	0.171458	0.134506	0.231858	0.318	0.410952	0.400111	-0.141449	-0.0072095	0.0111715	0.114708	0.0499068
SNX25	0.154455	0.148396	0.201169	0.157363	0.187005	0.409005	0.0391518	0.0850676	0.0214355	-0.161149	-0.243911
KDM4C	NA	NA	NA	1.0205	0.770254	1.80951	0.152917	0.17234	0.0630489	NA	NA
MTG2	0.346422	0.210018	0.244549	0.473189	0.505656	0.870552	-0.0455284	-0.159559	0.135934	0.877065	0.754347
ZNF644	-0.763984	-1.19042	-0.866131	-0.852575	-0.801845	-2.69944	NA	NA	NA	NA	NA
TFB2M	-0.334115	-0.680462	-0.547262	-0.71558	-0.781066	-0.897506	-0.0708339	-0.155935	-0.220818	-0.3518	-0.274897
PCNX3	0.183447	0.255611	0.206884	0.199126	0.226693	0.344792	0.0623653	0.194201	0.275066	0.116072	-0.0993188
NARFL	0.319808	0.28174	0.3024	0.561476	0.550635	0.75695	NA	NA	NA	NA	NA
EPS8L2	0.73603	0.998706	1.0207	1.09099	1.09312	1.28013	0.251038	0.460366	0.482316	0.363452	0.400412
PEAK1	0.207203	0.295047	0.300518	0.286231	0.403986	0.439043	0.14346	0.137977	0.128896	0.301923	0.163755
TDRD3	-0.139047	-0.423488	-0.399906	-0.345269	-0.261635	-0.730508	-0.131236	-0.129768	-0.0915706	0.0581405	0.0610327
C8orf33	-0.0636758	-0.332852	-0.373784	-0.540763	-0.472595	-1.05236	-0.0699815	-0.0997327	-0.0146416	0.0380018	-0.0392975
SUDS3	-0.663657	-0.83967	-0.982179	-0.583699	-0.884586	-1.42135	NA	NA	NA	NA	NA
YY1AP1	-0.322652	-1.13651	-0.75805	-0.775225	-0.832223	-1.57793	NA	NA	NA	NA	NA
C10orf88	-0.100513	-0.1153	-0.0591347	-0.103645	0.0139229	-0.400185	-0.0429329	-0.0479255	0.408358	0.622448	0.404554
EVA1A	-0.898001	-0.502685	-0.196942	-0.453137	-1.19438	-1.88339	NA	NA	NA	NA	NA
ANKZF1	-0.204489	-0.219024	-0.297027	-0.217591	-0.0686842	-0.207394	0.0905145	0.0727962	-0.00572767	-0.0478883	-0.0656718
SLC25A22	0.158175	0.35727	0.422805	0.444535	0.202589	0.829734	-0.0418242	0.0443376	-0.120521	-0.206373	-0.1004
MED20	0.159288	-0.409363	-0.424625	-0.23245	-0.120122	-0.431229	-0.0125183	-0.184631	-0.167268	-0.0315584	-0.229257
WDR76	-0.859906	-1.69452	-1.64594	-1.47672	-1.523	-1.99959	-0.238203	-0.723637	-0.469133	-0.382609	-0.120915
SFXN1	-0.102908	-0.0114038	0.0236869	0.208337	0.143575	0.663528	0.247267	0.144182	0.122375	0.0864952	0.100419
FN3KRP	-0.0663233	-0.0281575	-0.00892828	0.0523967	-0.111096	0.438977	-0.105647	-0.14809	-0.127952	-0.146548	-0.0271833
CARS2	0.0490749	0.216946	0.0510454	0.155998	-0.235281	0.197526	0.0483254	0.0214178	-0.136296	-0.544934	-0.280723
RNPEPL1	NA	NA	NA	0.0975061	-0.0106052	0.297386	-0.114844	0.0941645	0.187481	NA	NA
RRAGC	-0.0653255	0.296604	0.110176	0.191593	-0.108186	0.811177	-0.068446	0.0872876	-0.0228567	-0.290226	-0.203577
RC3H2	0.0617515	0.118955	0.170531	0.0672531	0.388731	0.107509	-0.100314	0.205788	-0.0428128	0.281984	0.129877
MRM3	-0.327029	-0.22145	-0.531944	-0.64357	-0.535937	-1.07214	0.21332	0.11695	0.171645	0.415094	0.229718
VAT1L	-0.325425	-0.671225	-0.560834	-0.838364	-0.460283	-0.528313	-0.0473089	-0.209806	-0.165918	0.575184	-0.268053
RANGRF	-0.0823159	-0.0186461	0.0478895	-0.0743061	0.0433866	-0.279775	-0.163408	-0.3274	0.0371479	-0.0367454	0.212265
RAB18	0.175857	0.20573	0.210039	0.0739203	0.0412796	0.205451	-0.0792431	-0.0954787	-0.0907916	-0.113741	-0.0288157
SSU72	-0.208729	-0.448864	-0.334831	-0.346724	-0.380936	-0.589086	-0.0150215	-0.103961	-0.0602111	-0.0152522	0.0293499
VTA1	0.0363416	0.148769	0.0951279	0.1175	0.0681648	0.249464	-0.257081	-0.209128	-0.307346	-0.313	-0.21705
MID1IP1	-0.229112	-0.381895	0.0939516	-0.0791998	-0.138528	-0.0794202	-0.263936	0.0844932	0.330344	NA	NA
EXOSC4	-0.422641	-0.667396	-0.616039	-0.683198	-0.686282	-1.36552	0.0947147	-0.136599	-0.0720396	0.0450024	0.07448
NOP10	-0.331326	-0.489035	-0.44353	-0.515897	-0.557918	-0.575185	-0.024235	-0.173504	-0.16914	-0.164573	-0.0325471
RTN4	0.385106	0.260019	0.363407	0.302103	0.00862363	0.895738	0.0695578	0.300512	0.23164	-0.00327615	-0.129426
AVEN	0.138705	0.253855	0.0462224	0.0908864	0.255149	0.101115	0.174925	0.0207668	0.118436	0.0925904	0.172403
UTP3	-0.423058	-0.464417	-0.472766	-0.483626	-0.487418	-1.29999	-0.0831392	-0.290975	-0.105274	-0.0911604	-0.126116
STARD7	0.277417	0.329961	0.321342	0.356042	0.247921	0.64229	-0.0795593	0.0256468	-0.170471	-0.214133	-0.0949166
ENTPD7	0.516845	0.092963	0.224123	-0.356755	0.176014	-0.116725	NA	NA	NA	NA	NA
PDLIM7	0.240255	0.169348	0.178295	0.148187	0.471587	0.653608	-0.240765	-0.247852	-0.230646	-0.145459	-0.214803
ASH1L	-0.19541	-0.567526	-0.550814	-0.74121	-0.506321	-1.0658	0.189925	0.0493377	0.146259	0.0430439	0.140251
PRTFDC1	-0.470375	-0.77169	-0.637104	-0.608166	-0.58071	-1.25089	0.0396403	-0.060246	0.15387	0.401304	0.205129
PCDHB16	NA	NA	NA	0.573063	0.854741	0.533442	-0.0709686	0.478786	0.556052	NA	NA
AASDHPPT	-0.0464949	-0.176455	-0.137195	-0.246607	-0.24806	-0.226563	-0.155283	-0.213732	-0.18686	-0.232478	-0.10311
SNX15	-0.216488	-0.185277	-0.30409	-0.197573	-0.0811256	-0.229223	0.0265538	-0.0528065	0.114129	0.0474767	0.0696868
MRPL17	-0.00386995	-0.117783	-0.104372	-0.023401	0.036371	-0.162232	0.0628184	0.102524	0.0336606	-0.173391	-0.190197
PHPT1	0.549928	0.63974	0.551671	0.663923	0.745198	1.66032	0.00496968	0.136203	-0.14417	-0.376522	-0.34081
AGPAT4	0.161237	0.171348	0.1633	-0.0660636	0.0721513	0.322346	-0.0599917	-0.161157	-0.142236	0.0570441	0.363354
MBIP	-0.512507	-0.441239	-0.421507	-0.394594	-0.263788	-0.780818	-0.204975	-0.469547	-0.343704	-0.188696	-0.252552
DIAPH3	-0.647151	-1.15764	-0.955243	-1.20594	-1.15287	-1.8693	-0.258268	-0.521253	-0.55046	-0.531633	-0.1974
BMP2K	0.173186	0.201459	0.332218	0.286305	0.416681	0.578347	0.212517	0.0690368	0.117103	0.066214	0.116981
PDS5B	-0.477978	-0.841203	-0.701864	-0.799765	-0.783968	-1.51149	-0.0434174	-0.149616	-0.109687	0.0476781	0.0279976
DECR2	0.513367	0.732169	0.73088	0.900823	0.872785	1.48537	-0.159382	0.086442	0.121007	0.18809	0.00686051
RYDEN	0.100268	0.328385	0.622795	0.652872	0.819709	1.26821	-0.213311	0.00965165	-0.0749876	-0.186737	-0.314456
INTS9	-0.28076	-0.491847	-0.447405	-0.517729	-0.45938	-0.88281	-0.258536	-0.370045	-0.192983	-0.171931	-0.144054
SLC38A7	0.344092	0.777354	0.645647	0.758312	0.509893	1.92009	-0.0630101	0.189793	-0.044079	-0.435289	-0.337294
POLR3B	-0.163888	-0.51791	-0.397634	-0.430806	-0.387501	-0.675074	0.0779184	0.00275847	0.0386969	0.0455099	0.00582792
PLEKHJ1	-0.014041	-0.144965	0.306688	0.11371	0.0388287	0.31143	-0.0847199	0.124535	0.151128	0.00270038	0.116033
RMND1	0.183335	0.211089	0.243719	0.159444	0.121219	0.330227	-0.0276299	0.0608572	0.0158273	-0.1838	-0.0978386
BABAM1	0.172217	0.372062	0.346128	0.323215	0.223736	0.485424	0.155382	0.0879013	0.183628	0.259889	0.185507
ASB6	0.0580638	-0.0431998	-0.008839	-0.128351	-0.284374	0.00953884	0.0942855	0.0864129	-0.0857216	-0.333636	-0.139298
HPF1	-0.416504	-0.801569	-0.647597	-0.826589	-0.924858	-1.62118	-0.0115305	-0.274548	-0.18796	-0.046599	-0.151086
NDUFB11	0.150974	0.447733	0.319993	0.498061	0.281051	0.8206	0.252716	0.296499	0.259591	0.255061	-0.0919893
2021-03-05	0.258828	0.211832	0.0144595	-0.0555694	0.146445	0.247856	-0.08429	0.0111186	-0.0831657	-0.0272926	0.00856697
SMPD4	-0.419744	-0.629543	-0.661819	-0.694061	-0.632363	-0.854309	0.0551184	-0.14911	-0.171824	-0.0110672	-0.0242549
TOR4A	-0.0186005	-0.162943	-0.0489713	-0.109816	0.0200883	-0.489472	0.0912249	0.0244952	0.0711365	0.0625991	0.0440492
ING3	-0.421424	-0.92883	-0.812355	-1.00307	-0.768461	-1.54205	-0.337567	-0.384061	-0.151644	-0.0893993	-0.114327
AATF	-0.13552	-0.532995	-0.486292	-0.630265	-0.561565	-0.887224	0.179924	0.0793569	0.116162	0.0471126	0.154605
ZAK	-0.0727453	-0.196629	-0.147228	0.00556137	-0.0153524	-0.431585	-0.184429	-0.261038	-0.314086	-0.188757	-0.00747807
MIS18A	-1.28925	-1.92957	-1.54071	-1.2692	-1.54251	-3.09063	-0.105801	-0.791008	-0.463043	-0.499536	-0.27172
CDK12	-0.156581	-0.508405	-0.48147	-0.515691	-0.354833	-0.94422	0.0385521	-0.161809	-0.102001	-0.0745474	-0.00804734
USE1	0.115331	0.222272	0.146472	0.364771	0.333454	0.697201	0.304026	0.136153	0.171028	-0.0638544	0.0600266
SACS	-0.258967	-0.592421	-0.464461	-0.476183	-0.296573	-0.327872	0.174262	0.0574758	0.166688	0.190601	0.0129215
EHD3	0.0958176	0.0139389	-0.0764481	-0.209772	-0.222943	-0.740944	0.201091	0.397022	0.313784	0.191785	-0.0672079
CNOT2	-0.0391796	-0.400445	-0.171182	-0.370778	-0.341847	-0.442602	-0.233815	-0.107126	-0.12249	-0.224802	0.0603544
C1RL	-1.57814	-0.747871	-0.94043	-0.899259	-0.936051	-0.9557	NA	NA	NA	NA	NA
EMC3	0.0266329	0.166808	0.121287	0.175322	0.210106	0.565547	0.0208714	0.0301698	0.0493337	0.0347893	-0.0666647
SCHIP1	0.557576	0.769975	0.570696	0.557125	0.751732	0.301136	0.576386	0.111247	0.52024	0.448605	0.757673
ACTR3B	0.278055	0.282457	0.385529	0.366073	0.380396	0.596952	-0.0546794	0.0242861	-0.0501503	-0.00127024	-0.0683679
USP35	0.0963512	0.162251	0.0680804	0.339943	0.125022	0.289536	NA	NA	NA	NA	NA
PDP2	0.14151	-0.2364	-0.201688	-0.00911781	-0.0264547	0.171893	0.0611531	0.114927	-0.0548695	-0.183295	0.112853
RBM27	-0.231037	-0.514278	-0.428428	-0.524524	-0.500544	-1.03422	0.0622879	0.068795	0.0934059	0.193801	0.0504273
KANSL3	-0.100208	-0.676443	-0.482574	-0.69268	-0.378115	-1.75861	0.0382095	-0.235774	-0.0714136	0.053002	0.138114
RNF14	0.32667	0.711191	0.576816	0.466579	0.278363	0.962168	-0.242713	-0.00122816	-0.223902	-0.436247	-0.377721
ZNF629	-0.278428	-0.419369	-0.360571	-0.480317	-0.360273	-1.04871	0.188287	0.00986419	0.129436	0.356369	0.258117
ZBTB47	-0.412507	-0.349524	-0.201781	-0.353344	-0.578664	-0.0351965	NA	NA	NA	NA	NA
CACFD1	0.254677	0.189818	0.256638	0.637011	0.416611	0.60979	0.205671	0.383077	-0.111416	0.191699	-0.202502
ENOPH1	-0.069288	0.168721	0.0888756	0.146003	-0.11092	0.456611	-0.047127	-0.0133058	-0.046195	-0.188552	-0.196562
BAZ2A	-0.302048	-0.371906	-0.276464	-0.346015	-0.358964	-0.490053	0.408357	0.227693	0.311466	0.376178	0.383063
PLXNA1	0.151716	0.189923	0.223516	0.176591	0.170163	0.534009	0.191675	0.377889	0.232369	0.016797	0.0826875
RABGEF1	0.0739738	0.349467	0.335655	0.283127	0.216524	0.369134	0.0329861	-0.0389519	0.0200526	-0.0919268	0.0499829
CRLS1	0.174012	-0.153938	0.046113	-0.17197	-0.0542076	0.0490804	-0.202562	-0.289337	-0.0827063	-0.176922	-0.19333
MID2	-0.0975096	0.0633536	-0.0520052	-0.174898	-0.237681	-0.3865	0.194736	0.0772305	0.417983	0.339728	0.353061
RPS6KA6	0.10449	-0.0840176	-0.0092188	-0.0421929	-0.141523	-0.00269507	-0.124492	0.226901	0.0692457	-0.0319802	-0.103747
LSM7	-0.504246	-0.633329	-0.547723	-0.452048	-0.572648	-1.05386	0.0428813	-0.0971766	-0.104448	-0.124439	-0.246075
AKAP11	0.0585836	0.0427167	-0.116048	-0.0606518	-0.0662782	-0.273353	0.215073	0.202713	0.201975	0.147515	0.293293
PARP4	0.26921	0.314656	0.361892	0.394187	0.458456	0.781269	0.0762402	0.204936	0.121026	0.0101227	0.00238084
GTF3C4	-0.479825	-1.01365	-0.865763	-0.876929	-0.834034	-1.42033	0.0210011	-0.19535	-0.130638	-0.0133735	0.0783682
HDAC9	0.39519	0.626464	0.48816	0.293346	0.24902	-0.106101	0.557907	0.550434	0.358799	0.247496	0.470664
CNOT11	0.0237157	-0.19849	-0.225013	-0.330917	-0.12042	-0.438752	-0.0300348	0.00577141	-0.0634842	-0.0342434	-0.0153912
RAB23	-0.0541725	0.151539	0.10153	0.112653	0.0383325	0.19667	0.0354367	0.0167635	-0.089878	-0.160298	-0.12221
ACSL5	0.375984	0.685551	0.662167	0.347332	0.0585891	0.822669	-0.0913283	0.104467	-1.16938	-0.85091	-0.926264
ASAP1	0.111043	0.305907	0.247643	0.390922	0.434634	0.423032	0.168701	0.316227	0.354924	0.423426	0.330251
HEG1	-0.183933	0.408898	0.535182	0.625437	1.06682	1.21549	-0.0269657	0.353831	0.308356	0.582247	0.0750752
ANGEL1	-0.122486	0.639758	-0.169128	-0.179188	-0.176504	0.127111	NA	NA	NA	NA	NA
COPS3	-0.0148489	-0.0184422	-0.00448787	0.0479108	-0.107503	0.161348	-0.115161	-0.14151	-0.305434	-0.255949	-0.237335
RPL26L1	-0.171327	-0.0849527	-0.193171	-0.216955	-0.340874	-0.324933	-0.125897	-0.162246	-0.121918	0.103879	-0.0757197
WDR3	-0.156904	-0.629753	-0.49767	-0.557092	-0.515227	-0.887742	0.0772448	-0.103053	-0.121196	-0.164562	-0.0736682
MACF1	0.551744	0.36304	0.350449	0.488043	0.51402	1.06554	0.705197	0.394843	0.646977	0.629759	0.686548
HPS5	0.0517608	0.297415	0.241048	0.30642	0.271105	0.431573	0.146048	0.264965	0.347308	0.147937	0.342954
DNM3	0.119339	0.0478807	0.0492864	0.0926011	0.0258913	0.588282	-0.0471043	-0.0537895	-0.0905593	-0.031767	-0.10431
RUVBL2	-0.191881	-0.0810934	-0.142218	-0.132613	-0.0761681	-0.190245	-0.230617	-0.226311	-0.156192	-0.182064	-0.11057
AKT3	-0.108468	-0.177696	-0.178196	-0.234296	-0.168261	-0.37575	-0.270812	-0.0591129	-0.167817	-0.469939	0.0989426
RNF6	NA	NA	NA	NA	NA	NA	NA	NA	NA	NA	NA
BCS1L	-0.00113987	-0.0928682	-0.0992339	-0.0568766	-0.0490902	0.384138	0.0245209	-0.0361336	0.0684146	0.022664	-0.0323636
POFUT2	0.582668	0.796322	0.83635	0.958859	1.03256	1.58486	-0.146795	-0.0424649	-0.206655	0.0459141	0.00384614
NOP58	-0.35044	-0.584615	-0.518749	-0.622633	-0.668318	-0.702011	-0.128206	-0.288732	-0.203129	-0.178758	-0.166379
DERA	0.123362	0.107901	0.0668914	-0.0988606	-0.0330323	0.0987681	-0.0677737	0.102548	-0.0361221	-0.0682104	-0.22925
MEMO1	0.189064	0.225844	0.248384	0.171964	0.200193	0.403312	-0.0559715	0.0249644	-0.0339471	-0.125354	-0.080726
EXOSC1	-0.42936	-0.528859	-0.557101	-0.850075	-0.754472	-1.33867	-0.0629029	-0.227693	-0.112768	0.17563	0.156238
RAP2C	0.210882	0.0598227	-0.0307312	0.0387764	0.0215463	-0.0840466	0.13909	0.106269	0.0989842	0.0875197	0.0469797
STARD13	0.048094	-0.00469012	0.0332831	0.0048379	0.298586	-0.279977	-0.16911	-0.353401	-0.230562	-0.262081	-0.279139
CCDC9	0.0627948	0.126241	-0.0245549	0.0944372	0.373333	-0.049114	-0.0852546	-0.129344	-0.167888	-0.0122115	-0.0589498
KNSTRN	-0.737529	-1.06181	-0.923214	-1.17511	-1.39078	-2.49089	-0.0451635	-0.543158	-0.234129	-0.142321	0.00845372
RAD54L2	-0.354295	-0.847546	-0.361062	-0.723394	-0.468762	-1.06281	0.173789	0.0194987	-0.131336	-0.112052	-0.0525224
TCAF1	0.0111632	-0.0937136	-0.107625	-0.192764	-0.0879847	-0.106104	-0.00892491	-0.0628844	-0.081259	-0.0594728	-0.136571
ZNF451	-0.546925	-0.246406	-0.686411	-0.55404	-0.195479	-1.20718	-0.214675	-0.426952	-0.381884	-0.0598623	-0.150034
MYO5A	0.17742	0.37112	0.32171	0.410682	0.305336	0.663721	-0.0725258	-0.0331631	-0.0190263	-0.0435826	-0.040134
DTNA	0.467501	0.892206	0.766677	0.701885	0.510362	1.1858	-0.151166	-0.1813	-0.49539	-0.71923	-0.775958
CTDP1	0.0108135	-0.0668786	-0.00266465	-0.0895654	-0.0496952	-0.250977	0.35386	0.27865	0.297697	0.352102	0.307915
FKBP7	0.279817	0.280386	0.314297	0.380172	0.562739	0.386791	-0.107753	0.0791486	0.0686856	0.29283	0.120431
TLL2	0.0936565	0.112226	0.113118	0.209469	0.309184	0.510861	0.099687	0.174676	0.0801356	-0.0102639	-0.104249
SLC4A4	0.0162834	0.0388838	0.0473779	-0.292061	-0.126315	-0.380895	-0.385496	-0.402497	-0.644871	-0.71399	-0.433595
RBM8	-0.2295	-0.677733	-0.458441	-0.650571	-0.638282	-0.946731	-0.229228	-0.125346	-0.269446	-0.124	-0.232453
CCDC22	0.127585	0.362916	0.215371	0.359955	0.18201	0.790006	-0.0828932	0.0270077	-0.0465388	-0.158253	-0.091949
PRAF2	0.297003	0.767222	0.609448	0.521898	0.613173	0.830861	-0.753813	-0.736861	-0.499611	-0.428899	-0.548033
LRRC20	0.15522	0.182341	0.419296	0.396251	0.0653528	0.979244	0.160267	0.023782	-0.0122127	-0.0529883	-0.26485
PLAU	-0.40782	-0.717726	-0.60582	-0.887319	-0.557213	-0.624166	0.373021	0.227398	0.0793164	-0.490315	-0.281864
C10orf56	-0.122793	-0.257249	-0.15483	-0.175367	-0.0649161	-0.604204	0.225309	0.153997	0.20103	0.484037	0.339557
EXOC2	0.160724	0.221729	0.266589	0.266482	0.241659	0.704966	-0.000344027	0.0230793	-0.0356418	-0.0347083	-0.00214958
RIPK1	0.112082	0.0863622	0.136523	0.150973	0.240359	0.0588092	-0.213248	-0.0931789	-0.152352	-0.0369451	-0.130685
JTV1	0.0947648	0.126338	0.0385194	0.0176697	0.132379	0.23489	-0.01435	-0.0284595	-0.102965	-0.0394047	-0.073275
FAM50B	-1.26344	-1.20511	-1.31043	-0.418856	-0.676288	-0.646834	NA	NA	NA	NA	NA
MGC20255	-0.117822	-0.490335	-0.465165	-0.435861	-0.513966	-0.710634	-0.20691	-0.32886	-0.307798	-0.363255	-0.56566
PAFAH1B3	-0.0353232	0.000265121	-0.0982982	-0.153841	-0.0729463	-0.00445787	0.0983221	0.0420679	0.175173	0.0936035	0.104018
ITPKC	0.0715161	0.0658466	0.0569252	0.0768939	0.109352	0.271015	-0.191258	-0.0187893	-0.139015	-0.05567	-0.123764
hCG_28765	0.440485	0.702765	0.641619	0.889674	0.881221	1.56946	0.44892	0.51635	0.467777	0.279138	0.410294
UGCG	-0.32739	0.41623	-0.130166	-0.536122	-0.314208	-0.882999	-0.479074	-0.627467	-0.713909	-0.78204	-0.500798
C9orf125	-0.0319127	0.021929	0.0521408	-0.0608671	-0.0230771	0.264657	-0.205017	-0.145582	-0.266942	-0.404788	-0.410189
MTP18	-0.0378277	-0.180725	-0.153946	-0.143864	-0.117494	0.0968128	0.0638358	-0.147331	-0.0817677	0.0197237	0.176622
RANGAP1	-0.238997	-0.12733	-0.270886	-0.251807	-0.194308	-0.637053	-0.32322	-0.439117	-0.394167	-0.260358	-0.24313
MLX	-0.132582	0.0287965	-0.0770173	-0.10469	0.0043759	0.161767	0.0246552	0.0482721	-0.159172	-0.230856	-0.0823674
CASC3	-0.185683	-0.222738	-0.169914	-0.129471	-0.0665388	-0.466484	0.345258	0.111005	0.0300409	0.132044	0.245487
PSMD13	-0.0424051	-0.0222458	0.0503962	0.0761748	-0.0931422	0.0973429	0.0905343	-0.0153397	-0.0528211	-0.068882	-0.105121
CPEB1	NA	NA	NA	-0.416097	-0.790194	-0.147381	0.0330755	0.421268	-0.301227	NA	NA
TJP2	0.000851987	-0.057844	-0.123189	-0.205872	-0.170638	-0.866197	0.124913	0.174531	0.126378	0.0398971	0.113583
TMEM115	-0.125486	-0.0441706	-0.0377437	-0.192763	-0.249863	-0.534098	0.0257292	0.0118277	0.0355065	-0.250411	-0.114063
SC5DL	0.12708	0.2682	0.150165	0.246623	0.108876	0.511226	0.255175	0.287085	0.160692	-0.141641	0.0824931
PARP1	-0.525072	-1.00102	-0.824207	-0.96602	-0.811313	-1.57688	0.128976	-0.107277	0.0540536	0.209674	0.153067
C2orf33	0.11921	0.1251	0.129762	0.17589	0.251568	0.734633	0.121498	0.264177	0.149809	0.146737	0.225333
COPS8	-0.0546472	0.0640669	0.0334983	-0.103905	-0.0548883	0.21104	-0.00138689	-0.15917	-0.141456	-0.093723	-0.0625032
RPS9	-0.216726	-0.302562	-0.372888	-0.363265	-0.317858	-0.499141	-0.169227	-0.210566	-0.134096	-0.161861	-0.269686
PPP1R14B	-0.326333	-0.290033	-0.476085	-0.230742	-0.107602	-0.2322	0.456048	0.46668	0.600915	0.23822	0.403428
TM7SF2	0.704393	0.75452	0.606555	0.957033	1.38335	2.40732	0.739393	0.876328	0.726089	0.486713	0.354937
LOC51035	0.0200807	-0.0452302	-0.185268	-0.0393438	0.0863902	0.365636	0.424593	0.406983	0.326354	0.479783	0.474295
BANF1	-0.531263	0.128388	-0.258273	-0.145363	0.0619633	-0.515714	-0.365363	-0.0538508	-0.0160015	0.37914	0.0208618
GNB5	0.036571	-0.0858438	0.0928488	-0.320449	-0.207304	-0.255775	0.39202	0.192363	0.130521	0.500712	0.692981
CLN5	0.268543	0.339039	0.283971	0.464813	0.3485	0.843063	-0.00990168	0.142365	-0.0461667	-0.177206	-0.373867
SHCBP1	-0.844042	-1.67103	-1.39026	-1.70339	-1.84928	-3.83285	-0.446549	-0.717854	-0.747283	-0.873799	-0.435968
PLEKHG4	0.0514368	0.280486	0.175936	0.3522	-0.135498	-0.137737	-0.22856	-0.132524	-0.0242993	-0.214456	-0.12277
SLC44A2	0.0605512	0.509882	0.365289	0.629786	0.795896	1.16072	-0.113515	-0.0464503	-0.131858	0.0789613	0.189889
BTBD14B	-0.162706	-0.352496	-0.319248	-0.273576	-0.239181	-0.913146	0.196095	0.107869	0.265857	0.337327	0.322422
ASF1B	-0.922997	-1.9864	-1.31001	-1.72138	-1.83724	-3.17818	NA	NA	NA	NA	NA
SSBP4	0.258691	-0.826495	-0.58946	-0.692349	-0.293541	-0.742943	-0.626278	-0.614368	-0.532746	-0.431393	-0.296674
TMED9	0.234021	0.545282	0.174985	0.393528	0.549926	0.538032	-0.522647	-0.283006	-0.507944	-0.35638	-0.293603
GMIP	0.497833	0.449706	0.505217	0.591896	0.444368	0.590032	0.149465	0.397012	0.487525	0.416999	0.295392
ATP6V1H	0.392485	0.786092	0.69332	0.937616	0.527192	1.66572	0.281872	0.27784	-0.0124184	-0.148038	-0.0036811
RPL7	-0.183892	-0.109765	-0.230772	-0.373564	-0.170578	-0.546981	-0.376149	-0.366925	-0.250949	-0.138236	-0.254344
POLE3	-0.442358	-0.986417	-0.699393	-0.937031	-1.23387	-1.74067	0.166432	-0.0822258	-0.053345	-0.0837347	0.274926
CDC26	-0.160689	0.0674763	-0.0474425	0.286432	0.169874	-0.249402	0.154979	0.344209	0.451374	0.470747	0.260596
HDHD3	0.319014	0.698156	0.65216	0.823974	0.530561	1.26924	0.16215	-0.117759	-0.105136	-0.420782	-0.608592
GOLGA1	0.196365	0.143892	-0.00173651	0.0130243	0.060241	0.268225	0.0131496	0.0119603	-0.0503817	-0.0325013	-0.195689
SLC2A8	NA	NA	NA	0.807088	0.418226	2.27849	0.167579	0.192938	-0.101157	NA	NA
SSNA1	-0.449571	-0.488439	-0.379805	-0.547922	-0.329342	-1.26331	-0.238488	-0.131119	-0.141488	0.183805	-0.208047
C9orf140	-0.611114	-1.44574	-1.01718	-0.970744	-0.885657	-2.86736	0.215361	-0.0791283	0.0900745	0.357925	0.40793
C17orf80	0.122544	-0.0621475	-0.0779121	0.0315797	0.0528734	-0.284916	0.191723	0.276068	0.487394	0.255868	0.168239
CEP350	-0.0475838	-0.367053	-0.227264	-0.201629	-0.134064	-0.240994	0.0519415	0.125655	0.0868923	0.249307	0.195122
TOR1AIP2	0.328929	0.174582	0.342061	0.431936	0.439217	0.843123	0.414259	0.550549	0.58639	0.462305	0.369193
ETNK2	-0.246013	-0.109251	-0.212266	0.154084	0.335938	-0.258754	0.576743	0.773075	0.937956	0.590808	1.16543
FAM49B	0.23905	0.275058	0.326025	0.242589	0.232924	0.732488	-0.00109402	0.162497	0.154994	0.138998	0.225099
FYTTD1	0.19865	-0.112999	0.0428666	0.0895168	0.251596	0.0469411	0.407429	0.0988376	0.277104	0.269273	0.321795
LRRC57	0.0213498	0.238459	0.229037	0.356597	0.373002	1.02596	-0.085312	0.0570265	-0.0816044	-0.184014	-0.113436
ANLN	-0.721441	-1.30233	-1.17183	-1.37267	-1.4462	-3.51139	-0.136593	-0.596921	-0.477379	-0.562954	0.0118763
SLC35F5	0.51273	1.1703	0.917204	0.698418	0.491817	1.41672	0.334011	0.893055	0.442701	-0.0718227	0.284429
POLR2D	-0.556151	-0.704434	-0.597597	-0.51138	-0.535299	-1.38154	0.00557731	-0.111273	-0.243028	-0.25958	-0.461658
HNRPA1	-0.541393	-0.72521	-0.743473	-0.843797	-0.750553	-1.84807	-0.318615	-0.576386	-0.441663	-0.239356	-0.240486
CTDSP2	-0.37581	-0.425345	-0.32446	-0.751632	-0.808313	-0.710322	-0.139423	0.132393	-0.156522	-0.171025	-0.2864
PCTK2	-0.135566	-0.119507	-0.0401274	-0.106641	-0.0181476	-0.110035	0.0794029	-0.0389939	0.0752751	0.0161476	0.0357458
PIR	-0.0674875	-0.00382489	0.106487	-0.00249834	0.759858	1.45144	-0.0626913	-0.00937631	-0.0314816	-0.154764	-0.0636377
ASB7	-0.201045	0.10594	-0.0448218	-0.00362446	0.101271	-0.105379	0.0275765	-0.171292	NA	NA	NA
MRPL23	-0.227421	-0.20689	-0.0156914	-0.104472	-0.304848	-0.288112	0.11518	-0.104265	0.00155893	-0.208452	-0.228008
AGPAT1	0.268502	0.257812	0.349222	0.410011	0.503521	1.33982	-0.0283773	0.0938766	-0.040339	-0.0563568	-0.0432298
C6orf64	-0.158907	0.00427052	-0.444829	-0.00797857	0.0669722	0.143622	-0.164312	-0.0309139	0.0469892	0.199312	0.332342
PEX6	0.133336	0.0906395	0.153442	0.165466	0.205676	0.69974	-0.0227224	0.0467378	0.0977012	-0.180988	-0.0305197
SRF	-0.281988	-0.771905	-0.607747	-0.79237	-0.606449	-0.961992	0.29443	-0.267783	0.061857	0.405466	0.29315
SLC7A1	-0.0227947	-0.118382	-0.118689	-0.468727	-0.546267	-1.119	-0.054654	-0.104793	-0.153931	-0.0310539	-0.0617687
GPX4	0.168569	0.434623	0.442386	0.484284	0.538341	0.777917	0.103229	0.0432604	0.0124113	0.561424	0.245714
UBXN8	0.0626429	0.0991489	0.199493	0.0800421	0.173029	0.556541	0.0881172	0.060342	0.102849	0.00217617	0.209747
UHRF1	-0.961958	-1.74271	-1.4993	-1.79194	-1.90415	-3.32295	-0.223248	-0.812426	-0.620684	-0.48751	-0.228924
SLC9A7	0.426563	0.605982	0.575441	0.671569	0.69506	1.29265	-0.0478917	-0.210921	-0.150017	-0.135595	-0.0266974
ZCCHC17	-0.0120769	-0.169853	-0.173407	-0.149596	-0.245114	-0.144629	-0.0714115	-0.158158	-0.304001	-0.190271	-0.309954
PSME2	0.114354	0.281184	0.351024	0.379798	0.321009	0.316952	-0.162815	-0.229797	-0.156649	-0.058073	-0.0376342
TMEM120A	0.236824	1.28292	1.0333	0.971081	0.646132	1.63686	-0.717363	-0.281078	-0.176895	-0.446981	-0.277625
NARF	-0.610244	-0.447255	-0.165666	-0.616557	-0.826491	-0.626681	0.314209	-0.246	-0.344111	0.501422	-0.327231
TRIM39-RPP21	-0.102172	-0.0820534	-0.241422	-0.246535	-0.230754	-0.155626	-0.0436932	0.0069146	0.136194	-0.0277646	0.0061408
MAP4K5	0.178074	0.217903	0.27855	0.287554	0.422836	0.284018	0.064674	0.161051	0.121475	0.096581	0.0361397
SCLY	0.0144781	0.199884	0.0685331	0.150781	0.13139	0.814501	0.0247881	-0.0117347	-0.00130348	0.0993447	0.0470543
SLC10A3	NA	NA	NA	0.365026	0.526725	1.0776	0.389587	0.293204	0.286783	NA	NA
ADCY3	-0.109343	0.219405	0.101213	-0.0323782	-0.240588	-0.587265	0.0864268	0.171603	0.145642	0.0809778	0.495968
ILK	0.10624	0.13554	0.0867594	0.0578147	0.0793647	-0.0266781	-0.356134	-0.432301	-0.515842	-0.616536	-0.588453
BORCS7-ASMT	0.162178	0.287151	0.325208	0.498777	0.380126	0.880122	-0.116525	0.114752	0.268761	0.0682863	-0.0643835
CYP51A1	0.0118747	-0.130998	0.0488922	-0.0964623	0.000568405	-0.244774	0.226918	0.321945	0.239293	-0.106196	-0.012787
ZNF574	-0.234101	-0.21403	-0.467724	-0.306673	-0.492801	-0.64615	0.0438751	-0.154943	-0.0211493	-0.149864	-0.291764
SYNE1	0.158837	0.148672	0.155768	0.0538392	0.221825	0.0161459	-0.172974	-0.259602	-0.288538	-0.375455	-0.268286
SERPINI2	0.0124181	0.220338	0.427094	0.493049	0.40162	1.18537	0.0453999	-0.0714947	-0.122505	0.0977889	0.0303682
SPTAN1	0.586191	0.526592	0.194468	0.446105	0.748156	0.356468	0.381996	0.211376	0.193882	0.226434	0.544985
CYTH2	-0.0365501	-0.166819	-0.110408	-0.171451	-0.278913	-0.48057	-0.0959225	-0.294232	-0.235762	-0.293118	-0.26245
CLDND1	-0.120102	-0.133682	-0.0930962	-0.0630735	0.00341278	0.157893	0.231886	0.211827	-0.262722	-0.313092	-0.128684
COL1A2	0.113435	0.209991	0.145087	0.114365	0.170362	-0.695132	-0.0339013	0.111727	0.0756593	0.689394	0.081742
RCC1	-0.538929	-0.724589	-0.614684	-0.67443	-0.559661	-0.772157	-0.166018	-0.420244	-0.24707	-0.00462259	-0.112594
PROS1	0.103387	0.813037	0.689032	0.388064	0.743758	0.130081	0.184882	0.449008	-0.0622616	-0.0458436	-0.0540347
TUBG2	-0.375388	-0.332161	-0.534805	-0.476801	-0.390992	-0.705132	-0.0178282	-0.120549	-0.0780323	0.0948222	0.131965
SLC22A17	0.265491	0.929471	0.386843	0.296402	-0.0949721	0.395922	-0.0688491	-0.0668079	-0.530639	-0.533903	-0.398623
STRN3	0.572695	1.07637	0.772923	1.19667	1.22592	1.55262	0.732076	0.519569	0.47576	0.829007	0.740377
ALG6	0.152638	0.120071	0.168169	0.126756	0.357503	0.684774	-0.219766	-0.120003	-0.260094	-0.316362	-0.222589
CSRP3	0.345085	-0.412531	-0.0565877	-0.183005	0.29588	1.14462	1.0003	1.08946	0.844572	0.522406	0.588487
CAPZA2	0.0995042	0.215899	0.232765	0.284424	0.309828	0.787562	-0.0614128	-0.047234	-0.16642	-0.241282	-0.14086
LSM8	-0.639568	-0.927183	-0.873598	-0.771874	-0.823805	-1.12033	-0.298767	-0.425133	-0.397285	-0.380309	-0.436394
ARF5	0.140639	0.151191	0.0937243	0.0302186	0.0219091	-0.0808821	-0.0958221	-0.196778	-0.325619	-0.180178	-0.0821684
CBX3	-0.59232	-1.03968	-0.915211	-1.02928	-1.04261	-1.55102	0.185231	-0.130702	0.12553	0.237662	0.0612751
ZMYM3	-0.0601312	-0.54074	-0.386042	-0.45649	-0.17488	-0.945634	-0.0527673	-0.161575	-0.061662	0.195896	0.048375
ZBTB8OS	0.00736915	0.13663	0.13781	0.239168	0.134221	0.515726	-0.146119	-0.0198578	-0.183326	-0.460411	-0.217692
PTPN1	0.520279	0.600233	0.705045	0.795908	0.770974	1.6094	0.0425467	0.116711	0.0690693	-0.0423259	-0.050071
SFRS4	-0.246676	-0.435929	-0.511882	-0.489702	-0.456618	-0.896844	-0.0263654	-0.198424	-0.153493	0.132476	0.121
TSSC1	0.0855671	0.190636	0.0540164	0.216284	0.131063	0.404342	-0.130899	-0.0898735	-0.112453	-0.049977	-0.123958
CPNE1	0.164157	0.263694	0.28589	0.452042	0.772228	1.06891	0.137611	0.232077	0.259878	0.245073	0.210518
WDR46	-0.300011	-0.477225	-0.54659	-0.531077	-0.517797	-0.824788	0.0265335	-0.128872	-0.122418	-0.128511	-0.158187
ARL5B	0.180793	-0.0357887	-0.206237	-0.308383	-0.315007	0.0407259	-0.16692	-0.0614689	NA	NA	NA
MAD2L2	-0.0466825	0.253517	0.0375797	0.00716505	0.345934	0.394473	0.0593988	0.158227	0.173754	0.55275	-0.011659
DDAH1	0.0784163	0.155904	0.222234	0.366789	0.425064	1.35466	-0.0442361	-0.0518137	-0.0304102	-0.0822242	-0.19192
DYNLRB1	-0.0695926	0.0601197	0.0983886	0.252123	0.223049	0.474679	0.299194	0.467101	0.490055	0.358804	0.221263
PSEN2	0.400364	0.808647	0.606967	0.614347	0.496791	1.48266	0.0780251	0.486992	0.209033	-0.200867	0.0316595
URCC5	0.104484	-0.0811017	-0.0525048	-0.0489175	0.0927063	0.0694886	0.0228486	0.0551697	0.0450559	0.200562	0.101803
TNS1	0.331557	0.192316	0.179835	0.121188	0.268248	0.123543	0.0566678	0.138378	0.0846223	0.152954	-0.0274816
PHF15	0.0630068	-0.39078	-0.20421	-0.343244	-0.278011	-0.749182	0.207252	0.120836	0.052477	-0.050202	0.107333
OATL1	-0.08196	0.100049	0.128802	-0.100534	0.0774228	-0.103545	NA	NA	NA	NA	NA
PRKD2	0.105008	0.0130711	0.203143	0.166203	0.337802	0.582098	-0.0788657	0.0914617	-0.140606	-0.119965	-0.106667
STK26	0.469915	0.565041	0.541145	0.460006	0.822304	0.506336	-0.21782	-0.381685	-0.0850589	0.229922	0.457519
TSPAN9	0.298646	0.799062	0.706122	0.61766	0.810715	0.903314	0.26892	0.55017	0.374762	0.429957	0.318964
KIAA1033	0.155549	0.142452	0.165253	0.0118522	-0.145952	0.23236	0.152821	0.210172	0.120812	-0.00288982	0.126403
ARFRP1	-0.0632933	-0.161797	-0.046258	-0.230431	-0.193938	-0.11659	-0.160565	-0.0473318	-0.289058	-0.396928	-0.317826
FAM98C	0.305909	0.605372	0.401279	0.381333	0.115719	0.652539	0.129205	-0.00586653	-0.132955	-0.524054	-0.26031
SMARCA1	-0.390685	-0.634237	-0.50689	-0.568204	-0.571697	-1.07599	-0.109609	-0.234004	-0.134574	0.018286	-0.00282077
MZT2B	-0.13824	-0.177637	-0.215533	-0.248078	-0.170656	-0.608242	-0.000812341	-0.174461	0.114421	0.133009	0.090294
feat	0.0402738	0.0569623	0.0503835	-0.0291149	-0.0418088	-0.0180804	0.378069	0.46188	0.459165	0.466474	0.362948
DISC1	0.143359	0.0980263	0.225192	0.160989	0.134689	0.067555	0.72114	0.527883	0.425767	0.303706	0.771828
FOXC1	-0.197652	-0.786274	-0.469998	-0.797335	-0.878737	-1.0918	-0.277932	-0.347041	-0.1971	0.0302763	0.0566761
MRPS34	0.117261	0.0388108	-0.0451625	0.14374	0.0958253	-0.246779	-0.0168713	-0.147296	-0.133951	-0.152702	-0.310687
HVCN1	-0.0920408	-0.00447477	-0.113702	-0.148254	-1.75383	-3.20314	NA	NA	NA	NA	NA
SH3BGRL3	0.34359	0.519418	0.528078	0.664374	0.704142	0.831655	0.0801868	0.197945	0.11252	0.0794877	0.103581
SERBP1	-0.117528	-0.330233	-0.360954	-0.269324	-0.0962303	-0.56388	0.0180959	-0.0781554	0.116659	0.00471163	0.0850054
TPP1	0.182204	0.656231	0.454458	0.84636	0.707431	2.37578	0.151873	0.238691	0.379496	0.0639422	0.0777577
SPFH1	-0.16162	-0.092808	-0.165985	-0.0902973	-0.0639995	-0.0509589	-0.204651	-0.222055	-0.158811	-0.0445281	-0.00333859
VBP1	-0.119381	-0.0364497	0.0240102	0.0325074	-0.00905457	0.211102	0.0447489	-0.0534426	0.00353832	-0.0134905	0.0223967
AR	0.365951	-0.0380993	0.271476	0.00926219	-1.80589	-1.90384	0.690267	0.892422	1.12597	1.0534	0.945651
RQCD1	-0.25737	-0.466148	-0.380469	-0.593425	-0.558595	-0.837329	0.324432	0.159529	0.152347	0.282341	0.209291
COL6A3	-0.0801175	-0.285371	-0.200488	-0.153291	-0.348096	-0.79766	0.149203	0.423366	0.316677	0.528317	0.256555
CETN3	-0.571021	-1.16467	-0.871019	-0.545315	-0.345039	-0.579203	0.741532	0.326859	0.517611	0.247616	0.612692
NDUFV2	0.25118	0.24496	0.144344	0.300909	0.380129	0.660824	0.149981	0.322071	0.15513	0.0685598	-0.161619
MYH10	NA	NA	NA	2.09394	2.20687	1.72081	-0.431482	-1.53099	-1.55521	NA	NA
ZC3H18	-0.42238	-0.612785	-0.617463	-0.648915	-0.557678	-1.24297	0.171085	-0.0470026	0.0916578	0.200231	0.238681
NDUFA10	0.235641	0.292448	0.398877	0.477056	0.354698	0.80485	0.193948	0.339562	0.196094	0.147464	-0.00564749
DNPEP	0.102588	0.215722	0.229462	0.152038	0.0834083	0.755326	0.0881124	0.146778	0.0856919	-0.0595907	0.0303741
YWHAZ	0.0974458	0.17162	0.216996	0.314552	0.333206	0.611606	0.133235	0.201849	0.436461	0.287924	0.460302
ACAN	0.796002	0.988317	1.17142	0.68503	-0.611299	-1.0822	0.0673505	0.0393395	0.974256	2.96284	3.4475
CCDC15	NA	NA	NA	-0.792987	-0.840557	-0.898774	0.348335	0.0891851	-0.212059	NA	NA
PDE4DIP	0.182216	0.255253	0.0328801	0.14005	0.18672	0.218973	-0.329195	0.0408327	0.194393	0.168663	-0.223946
CD59	0.432671	0.580275	0.613551	0.556118	0.601359	1.34912	-0.527085	-0.305893	-0.39455	-0.464905	-0.678712
SLC25A10	-0.183593	-0.174547	-0.173332	-0.285821	-0.227693	-0.0430427	0.00901711	0.0986659	-0.000456073	-0.282795	-0.15903
HYI	-0.00493679	0.113241	0.0272134	0.13789	0.125491	0.682222	-0.277792	-0.360801	-0.356323	-0.358572	-0.211442
SPRYD3	-0.472104	-0.144794	-0.257467	0.19854	-0.0674005	-0.059692	NA	NA	NA	NA	NA
PPHLN1	-0.275969	-0.667097	-0.787415	-0.211388	-0.168927	-1.24644	0.069836	-0.668125	-0.49721	-0.812432	0.52089
ARMCX4	-0.117962	0.0424556	0.271292	0.0454596	-0.160682	-0.260755	0.153015	0.44169	0.19681	0.238115	0.672302
PMPCB	0.172839	0.155533	0.137709	0.109182	0.0372896	0.281172	-0.177681	-0.0659494	-0.223445	-0.30923	-0.354485
ACYP1	-0.196129	-0.0640258	-0.0154809	0.100361	0.145323	0.799422	-0.202261	-0.265926	-0.162535	-0.0353112	0.0782597
NAPRT	-0.126193	-0.160686	-0.212762	-0.0819064	0.147972	-0.0323773	0.0158745	0.120465	0.0477349	-0.0145476	-0.122165
TJP1	NA	NA	NA	1.41033	1.77486	1.52214	0.914352	0.391447	0.650326	NA	NA
LIN9	-0.0553219	-0.623452	-0.567256	-0.672927	-0.70537	-0.867235	0.195675	0.256265	0.41471	0.707817	0.706907
PPIP5K2	0.114356	0.00253399	-0.00897045	0.0870778	0.312512	-0.567234	NA	NA	NA	NA	NA
PLEC	0.188415	0.560362	0.478165	0.451622	0.736537	0.979928	0.376779	0.703264	0.720317	0.85602	0.65708
GMPR2	0.470656	0.499835	0.434407	0.612234	0.564123	1.56184	0.0178432	0.084707	-0.0643058	-0.0565244	-0.0288099
MTRF1L	0.196648	0.100057	0.161228	-0.0495446	0.0592761	0.319949	-0.0415282	0.024987	0.219029	NA	NA
ARPP19	0.0660827	0.525908	0.488743	0.717344	0.699704	0.925004	0.565448	0.337629	0.571966	0.486741	0.409511
GOLGA6L2	NA	NA	NA	NA	NA	NA	NA	NA	NA	NA	NA
PRICKLE2	0.48823	0.50284	0.505679	0.442317	0.495638	1.00597	0.73287	0.753876	0.628626	0.750333	0.679188
CTDSP1	-0.00723992	0.0224396	-0.0121166	-0.259609	-0.208386	-0.204977	-0.16798	-0.0318079	-0.16443	-0.0994733	-0.0842847
hCG_1984214	0.0462706	-0.103325	-0.000972518	-0.0374532	-0.131852	-0.267787	0.168393	0.115752	0.107882	0.00200192	0.000953299
AFP	-0.865545	-0.714476	-0.918162	-0.52068	-0.560895	-0.780577	-0.285762	-0.111653	-0.163017	-0.388485	-0.703171
TRABD	-0.0362363	-0.115752	-0.125474	-0.0638723	-0.105675	-0.156164	0.482542	0.40988	0.47587	0.416121	0.386688
TBC1D8	-0.270443	-0.0805847	-0.0705259	0.106452	0.956317	1.42328	0.978291	0.363814	-0.118304	0.272176	0.0597185
CCDC12	-0.331763	-0.710509	-0.852884	-0.750486	-0.464651	-1.62301	0.566418	0.133277	0.246418	0.328316	0.275564
MRPS7	-0.167223	-0.108114	-0.167694	-0.125662	-0.295043	-0.401268	0.143999	0.102551	0.150975	0.0952687	0.00713052
CYGB	-0.436733	-0.64966	-0.571476	-0.275078	-0.565079	-0.24169	0.180789	0.428223	-0.144634	-0.0192179	-0.366599
APOC4-APOC2	-0.595293	-0.886366	-1.11461	-1.79865	-1.60779	-1.94888	1.49619	1.01675	0.626406	-0.397088	0.151135
UBE2O.1	0.0331093	-0.378134	-0.151754	-0.215188	-0.384265	-0.620909	0.0319339	0.071826	0.157847	0.182226	0.251797
DIAPH2	0.0341531	0.0468299	0.0705313	0.0460289	-0.287451	-0.353786	0.0815601	0.120388	0.0165065	-0.0406408	0.0652286
TXNRD2	0.0848202	0.234132	0.116153	0.109466	-0.0147973	0.392554	0.254936	0.195607	0.164968	0.162989	0.0717083
HBEBP2BPA	-0.102762	-0.415243	-0.00638195	-0.188405	-0.1593	-0.09579	0.0129211	0.176854	0.0432978	0.0224484	-0.0563024
GART	0.315593	0.660472	-0.787335	-1.07703	0.191972	-1.1527	NA	NA	NA	NA	NA
MYO1E	0.147208	0.191416	0.232369	0.188915	0.209067	0.467475	-0.135244	-0.125514	-0.150921	-0.182856	-0.129219
ABCA3	-0.545755	-1.0248	0.360377	-1.0887	-0.227043	-0.392099	0.000373378	0.0963403	1.10252	0.537435	0.154351
PLCG1	-0.146442	-0.242408	-0.1355	-0.239957	-0.187889	-0.14529	0.199297	0.176665	0.145053	0.0814209	0.125849
PPFIA2	0.270387	0.495738	0.554511	0.614677	0.51794	1.07436	-0.10236	0.192259	0.315402	0.0756236	0.114282
SSBP1	0.0555957	0.258307	0.253863	0.395341	0.108349	0.385361	0.306962	0.175573	0.0649291	0.122613	0.00337544
MED23	-0.391912	-0.708043	-0.63137	-0.582872	-0.561875	-1.05966	-0.0222762	-0.108666	-0.226871	-0.162745	-0.206317
APEX1	-0.240419	-0.342019	-0.464688	-0.468526	-0.275855	-0.941448	-0.116361	-0.313949	-0.212956	-0.0272853	0.021541
TAGLN	0.535117	0.902334	0.774	0.830776	1.23057	1.01251	-0.383566	-0.228562	-0.160757	0.231603	0.194831
B3GAT3	0.258006	0.24919	0.268303	0.398576	0.187235	0.173795	-0.163156	-0.233234	-0.4642	-0.440393	-0.329183
NMT2	0.00305254	-0.0114847	0.022836	0.0738564	0.311907	0.609661	0.0290781	0.149073	0.196587	0.416782	0.345412
DKFZp686N14223	-0.466007	-0.278731	-0.478905	-0.651811	0.075676	-1.15197	NA	NA	NA	NA	NA
TM4SF13	0.912774	0.812131	0.669469	0.69507	0.627585	1.4833	NA	NA	NA	NA	NA
STC2	0.209422	0.596787	0.48749	0.624961	0.514413	0.812815	0.0579575	0.276231	-0.0113624	0.0148433	0.0442127
PCNA	-0.638719	-1.08772	-0.933783	-1.01971	-1.25044	-2.6273	-0.184463	-0.524961	-0.405031	-0.344544	-0.446166
PSMB10	0.0597531	0.129759	0.626399	0.474448	0.784603	0.336047	0.0282567	-0.266611	0.147932	0.595575	0.392363
ADH5	-0.0558713	0.392461	0.342615	0.381028	0.193935	0.696683	-0.0545451	0.161613	0.102398	0.107219	-0.00133412
TFAM	-0.485271	-0.272502	-0.142696	-0.36561	-0.502673	-0.481096	0.00493898	-0.13982	0.0564095	0.257154	0.372681
FTH1	0.0588461	0.465069	0.553292	0.81609	0.0659588	2.2758	0.0106825	0.170612	-0.18903	-0.3506	-0.364317
BNIP3	0.107502	0.30387	0.406676	0.308808	-0.00689633	0.867276	0.311105	0.584041	0.394641	0.0317292	0.0858427
PPM2C	0.0858874	0.114017	0.157419	0.173309	0.227632	0.743825	0.00106908	0.0418719	-0.0302525	-0.0801304	-0.142002
DKFZp586L0518	-0.399065	-0.354154	0.218914	0.386884	0.383617	1.20135	NA	NA	NA	NA	NA
EIF5B	0.484071	-1.0712	-0.226772	-0.237562	-0.549748	0.292226	1.62953	1.53401	1.84703	0.985086	0.408457
DKFZp434I2129	0.146292	0.632402	0.326443	0.227465	0.0987157	0.369464	NA	NA	NA	NA	NA
THOP1	-0.0889973	-0.218175	-0.159771	-0.250308	-0.25885	-0.353241	0.101961	0.00656402	-0.0666462	-0.0309745	0.00724172
ORC1L	NA	NA	NA	-1.27821	-1.10401	-2.3759	-0.0894519	-0.413768	-0.396951	NA	NA
POLE1	-0.259311	-1.25332	-0.941799	-1.23258	-1.47128	-2.23235	NA	NA	NA	NA	NA
CSNK1G1	0.0529476	0.145602	0.16427	-0.0397651	-0.0864571	-0.0650848	0.154789	0.169277	0.0522967	-0.0205877	0.0796792
HEL-S-310	-0.0566028	-0.169957	-0.248619	-0.282041	-0.0577947	-0.417403	-0.120735	-0.160997	-0.0372473	0.00671787	-0.029111
HEL-S-100n	-0.0447863	-0.00527714	-0.0589915	-0.0553118	-0.0897976	-0.0114001	-0.0958434	-0.137884	-0.110666	-0.147285	-0.115289
HEL113	-0.101036	0.552503	0.391558	0.487959	0.303541	1.00334	-0.214682	-0.252964	-0.157949	-0.157862	-0.0649036
HEL57	0.207152	0.296513	0.381332	0.501376	0.776094	1.67795	-0.212262	-0.0755253	-0.180619	-0.00385444	0.0446541
SLIT2	-0.176098	-0.461376	-0.412004	-0.808041	-0.487373	-1.14543	0.116614	0.0588673	0.00555622	-0.152638	-0.156999
UHRF1BP1L	0.037693	0.0774714	0.0769992	0.155079	0.0935148	0.323664	-0.0536382	0.0296418	0.0508221	-0.0882146	-0.0149045
PLEKHG3	NA	NA	NA	NA	NA	NA	NA	NA	NA	NA	NA
SSC5D	0.81768	0.573155	0.885194	0.725287	0.879067	1.27377	-0.181689	0.358086	-0.396302	NA	NA
CPED1	-0.683921	0.142713	0.35094	-0.32207	0.16786	0.0615336	0.00396548	0.0446819	0.11633	NA	NA
VPS37C	0.344707	0.357424	0.494628	0.37399	0.281722	0.636455	0.0716113	-0.00918774	0.131188	0.402229	0.168445
MAP1LC3B2	0.0186977	0.304433	0.168659	-0.0287906	-0.202678	0.636019	-0.211541	-0.014131	-0.151824	-0.444755	-0.339206
UNC119B	0.235683	0.0777844	0.151208	0.219155	0.301336	0.408497	-0.159668	-0.129595	-0.0528413	-0.0916409	-0.139265
WTIP	NA	NA	NA	-0.520965	-0.663069	-0.637562	-0.154724	-0.215617	-0.142519	NA	NA
CCDC85C	0.112235	-0.0386331	-0.0732711	-0.0626685	0.327099	-0.232282	0.255911	-0.00589417	0.155196	0.614982	0.495446
NDUFS8	0.0437823	0.165641	0.207178	0.268813	0.0931687	0.43116	-0.00581909	-0.0163125	-0.0820703	-0.0619022	-0.181956
TAF4	-0.405975	-0.487975	-0.478594	-0.472111	-0.416301	-0.840532	-0.0114898	-0.213591	-0.0866459	0.189035	0.123937
TNFRSF11B	0.152959	-0.155464	-0.0220953	0.356047	1.31325	1.83661	1.08687	1.44021	1.48113	1.43609	1.15018
QSOX1	0.299463	0.193967	0.151355	0.138799	0.26195	0.463411	0.405878	0.557849	0.590518	0.382631	0.479334
IPO5	-0.0964066	-0.126189	-0.113037	-0.238092	-0.325032	-0.450687	-0.215805	-0.342151	-0.287291	-0.204051	-0.164643
PLOD2	0.389469	0.261465	0.33399	0.44438	0.710226	1.10722	-0.154343	-0.33764	-0.291935	-0.0960367	-0.165156
MEIS1	0.00324486	-0.35218	-0.529272	-0.204163	-0.315066	-1.71224	0.241836	0.133535	0.0708124	0.366736	0.094755
EXOC5	0.208793	0.256982	0.296702	0.2847	0.230468	0.742388	-0.0229475	0.104289	0.056842	-0.0146671	0.0832559
PSMD14	-0.020934	0.393971	0.167022	0.160344	0.148931	0.166156	-0.441216	-0.25116	-0.21822	-0.209164	-0.235219
EBAG9	-0.104793	-0.17399	-0.168922	-0.211891	-0.0854302	-0.187358	0.198207	0.243533	0.226713	0.271266	0.252345
TRIM38	0.185965	0.137297	0.282739	0.551941	0.240158	0.506252	-0.0405078	0.225483	-0.276607	-0.441961	-0.342874
PLPP1	0.339664	0.653445	0.800064	0.971848	0.257239	1.57207	0.281981	-0.221868	-0.161847	-0.189184	-0.501672
NEMP1	-0.277179	-0.534445	-0.410032	-0.494709	-0.492816	0.17856	NA	NA	NA	NA	NA
NDUFAB1	0.174286	0.532137	0.614619	0.609375	0.357725	0.71072	0.659412	0.744254	0.611785	0.328119	0.280391
DVL1	0.0633338	-0.000231593	-0.0770825	0.204102	0.261326	0.251531	0.155226	0.173823	0.144189	0.287637	0.411907
RIOK3	-0.21254	0.0388082	-0.0404449	-0.0355517	-0.0911615	-0.0367663	-0.0680105	0.0275293	-0.107985	-0.195937	-0.210082
TERT	0.292975	-0.000305378	0.244561	0.0994444	0.0203408	0.588363	-0.792902	-1.42675	-1.48349	-1.47286	-1.53122
POLR3A	-0.151989	-0.469944	-0.523084	-0.43748	-0.531915	-0.88181	-0.147976	-0.147197	-0.0059562	0.0829246	-0.0155632
RASGRF2	0.0804519	-0.414813	-0.603237	-0.00281032	0.145037	0.494096	0.277065	0.28736	-0.0768755	0.0819866	0.192731
SCAMP3	0.0210471	0.259086	0.0802668	0.0922823	-0.0480833	0.541793	0.283053	0.36038	0.289545	0.0321095	0.105745
BACH1	-0.0206628	-0.145205	-0.0982478	-0.014151	0.511772	-0.35336	0.274296	0.220607	0.208281	0.239483	0.187972
IKBKB	0.227723	0.417638	0.513825	0.500251	0.526222	0.977169	0.0137658	0.145933	0.079118	0.0822493	0.0678516
NACAD	0.000966496	0.133447	0.0112618	0.203025	0.826745	-0.0880508	0.0311638	0.18454	0.388699	0.496924	0.536666
SMAD7	-0.290492	-0.0653395	-0.125524	-0.406016	-1.22253	-0.665731	NA	NA	NA	NA	NA
LAMA5	-0.00454373	-0.0755297	-0.0244287	0.0470113	0.806144	0.738601	0.707681	1.41846	0.909993	1.31978	0.71138
OGT	-0.165276	-0.409339	-0.366049	-0.374878	-0.221684	-0.562157	-0.0840919	-0.140779	-0.0385161	0.0539696	0.10695
SLC16A6	0.00151192	0.814824	1.51432	0.962256	0.0282702	4.07903	0.569644	1.51877	1.18158	0.067147	0.896677
IRAK2	0.204426	0.102348	-0.362158	0.277488	0.450148	0.28027	-0.15858	-0.202517	-0.124492	0.214508	0.0443559
DYNC1LI2	0.243448	0.426472	0.456263	0.558127	0.481284	1.07547	0.115947	0.197305	0.146139	0.13676	0.19313
PAPSS1	-0.00753283	-0.155778	-0.111215	-0.215317	-0.219621	-0.986024	0.0410814	-0.156002	-0.0935647	-0.0798024	-0.0585849
SART1	-0.237874	-0.591922	-0.609859	-0.551883	-0.636205	-1.17758	0.131266	-0.0744003	-0.021976	0.0596802	0.0382437
MTSS1	-0.0547126	-0.0828051	0.0686744	0.419442	0.269396	0.601631	0.432672	0.597674	0.765141	0.965077	0.935364
HNRNPR	-0.3956	-0.540561	-0.488985	-0.660724	-0.637124	-1.18734	-0.0784502	-0.177321	-0.051991	0.102682	-0.0238966
ACTN4	0.160851	0.4148	0.313419	0.378162	0.375961	0.442786	-0.19876	-0.202593	-0.216777	-0.271514	-0.172313
SYNGR1	0.148278	0.557754	0.666792	0.738388	0.906564	1.67728	0.202844	0.373556	0.29375	0.299734	0.255113
RRP9	-0.149757	-0.493089	-0.42445	-0.634599	-0.781241	-0.992762	0.0731414	-0.218322	-0.33318	-0.143623	-0.0311547
CALU.1	0.0402111	0.553807	0.318131	0.513969	0.742353	1.00904	0.104569	0.0793468	0.111417	0.143891	0.0286937
CREB3	0.096789	0.162194	0.113516	-0.956684	0.11279	-0.49891	0.185491	0.187045	NA	NA	NA
ORC4	-0.541575	-0.751767	-0.639297	-0.796033	-0.848315	-1.79321	-0.268399	-0.467232	-0.397349	-0.331231	-0.342808
TIMM8A	-0.317441	0.0647272	0.215891	0.44471	0.384087	0.806978	0.147783	0.462498	0.598945	0.66484	0.0758094
SIPA1L3	-0.182499	-0.271663	-0.202817	-0.0869276	-0.0455278	-0.71582	-0.00919259	-0.177436	-0.0704939	-0.20099	-0.122317
KIAA0556	0.164441	0.339212	0.177923	0.237167	0.377503	0.353566	-0.268876	-0.242623	-0.0643298	0.0450091	-0.0536911
PIP5K1C	0.283818	0.398201	0.456499	0.395318	0.282078	0.678468	-0.133849	0.0248007	-0.149269	-0.247536	-0.150035
TPST1	0.327213	0.12435	0.0437694	0.162318	0.197572	0.676708	-0.0300397	0.398641	0.244149	-0.020966	-0.0382816
DKC1	-0.329291	-0.390359	-0.463198	-0.535904	-0.571805	-0.554652	-0.016933	-0.130487	-0.0330012	0.0519802	-0.00791576
EIF5B.1	0.0302341	0.133758	0.117616	0.135882	0.108656	0.133309	0.15038	0.0923963	0.178488	0.0950109	0.0636053
HUS1	-0.307055	-0.534175	-0.50161	-0.561277	-0.601514	-0.797688	-0.0588232	-0.0506417	-0.11871	-0.17814	-0.156716
CLASP2	NA	NA	NA	0.187968	-0.219061	-0.291796	0.0161512	0.164192	0.317409	NA	NA
DEPDC5	1.11679	1.25977	1.3093	0.787741	1.03974	3.3733	-0.0755582	0.423445	-0.107483	0.911933	0.876536
PHF2	-0.381459	-0.800669	-0.617826	-0.650508	-0.48643	-1.01197	0.0967444	-0.00528569	0.00440053	0.212663	0.0942352
ZC3H11A	-0.292428	-0.549331	-0.392665	-0.451238	-0.412249	-0.981368	0.0862034	0.0708583	0.0706716	0.13592	0.265926
TAF5L	-0.534007	-0.681516	-0.774307	-0.82746	-0.52855	-1.05761	-0.269819	-0.215167	-0.0593819	-0.209936	-0.217477
WBP4	-0.103405	-0.539392	-0.773425	-0.740173	-0.615537	-1.27121	-0.185825	-0.246043	-0.172425	0.307073	0.149129
CBR3	0.035189	0.0174789	-0.0156102	0.0304905	0.0130849	0.0820223	-0.0989866	-0.159465	-0.186569	0.073692	0.0192201
BCAS2	-0.438291	-0.382345	-0.48833	-0.628191	-0.554077	-1.15724	0.0134476	-0.145255	-0.10057	-0.08148	-0.0789326
TRIO	0.00121603	-0.121099	-0.0460039	0.00989508	0.240419	0.364004	0.00703019	0.110371	0.0303316	0.184599	0.0654941
MPDZ	0.19619	0.333564	0.244414	0.323653	0.413213	0.51595	-0.152344	-0.0454183	0.0515627	0.0605817	0.146432
TOX4	-0.389745	-0.610369	-0.535059	-0.629564	-0.63355	-1.25975	0.0512088	-0.158959	-0.00612419	0.128776	0.132262
KLHL18	-0.101451	-0.0282273	0.13768	0.182464	-0.0360173	0.652133	-0.419927	-0.381393	-0.328323	-0.292251	-0.179345
CLSTN1	0.120183	0.00811639	0.0173909	-0.270706	-0.0714621	0.250286	0.606993	0.63641	0.533061	0.113603	0.355489
ZFPL1	-0.0216361	-0.269109	-0.175575	-0.224691	-0.187446	-0.271289	0.33396	0.311659	0.116244	-0.0520592	0.0470271
KIF20A	-0.83089	-1.594	-1.25576	-1.47201	-1.47236	-3.30478	-0.117098	-0.508074	-0.335416	-0.411864	-0.174487
ABCB11	0.3882	0.822444	0.459476	1.38404	1.58357	2.29073	0.0461451	0.313665	0.447307	0.246082	0.293774
ZBTB7A	-0.160987	-0.400988	-0.514251	-0.147973	0.0107538	-0.68371	0.298451	0.0705921	0.159662	-0.0507567	0.0566292
LYPLA2	0.307548	0.343915	0.355873	0.391387	0.362495	0.384654	0.0449902	0.13201	0.0827564	-0.0539284	-0.0512698
MOCS3	0.150137	0.117844	0.190999	0.321601	0.329718	0.495975	0.0792283	0.118042	0.149348	0.0877256	0.10334
SVIL	0.46044	0.572312	0.679256	1.0046	0.625637	2.18218	0.448622	0.755662	0.656494	0.482182	0.512511
APOM	-0.397374	-0.721166	-0.54212	-1.1163	-1.34943	-1.21281	1.14576	0.948068	1.01035	0.407712	0.722517
SEC24A	0.1698	0.112577	0.133548	0.162385	0.155748	0.258458	0.0435113	0.046833	0.0655886	0.138966	0.0979047
TDP2	-0.0693884	-0.0659379	-0.210159	-0.174405	-0.181903	-0.0086362	0.318416	0.300204	0.378762	0.473637	0.406821
POLR1A	-0.228081	-0.497887	-0.457559	-0.552853	-0.520886	-0.888352	0.146542	0.0359415	0.0482816	-0.0422867	-0.079028
LATS1	0.113064	0.0535724	0.0388235	0.0524813	0.119002	-0.209041	0.288019	0.179535	0.326489	0.316976	0.417438
DDAH2	-0.237376	-0.127611	-0.215444	-0.175614	-0.030488	0.145056	-0.0332317	-0.0191621	-0.107826	0.0470312	0.0238674
RECK	0.556162	0.733442	0.599946	0.952892	1.57502	2.28256	0.235087	0.562387	0.639776	0.955944	0.646779
CYB5R3	0.00496856	0.45498	0.373793	0.572578	0.594439	1.36044	-0.342026	-0.0202529	-0.111875	-0.212299	-0.130059
HRAS	0.0931605	0.218985	0.0908132	0.18111	0.189231	0.309782	-0.0366488	0.0278528	-0.0439784	-0.0753177	-0.164796
FN1	0.271036	0.385869	0.441474	0.348389	-0.469803	-0.343342	0.110027	0.0649577	-0.189104	-0.0739714	-0.261044
ANXA1	0.158471	0.645254	0.475358	0.523734	0.650388	0.847369	-0.122625	-0.204762	-0.0609187	-0.0426549	-0.0840849
MT1E	-0.376398	-0.424548	-0.516407	-0.122793	0.143677	-1.08353	0.34935	-0.298752	NA	NA	NA
MYL1	-0.0137901	0.28961	0.183873	0.178043	0.379659	0.382857	-0.0508049	-0.124862	-0.105655	0.0845212	-0.428092
DBI	0.190928	0.470709	0.516525	0.964581	0.663454	0.633681	-0.101892	0.429971	0.0349673	0.226251	-0.0461141
CTSL	-0.0959433	0.125197	0.168417	0.163649	-0.168526	0.552709	0.427067	0.547609	0.304658	-0.247295	-0.0684791
IGF1R	-0.069228	-0.0643227	-0.0179986	-0.143388	0.0521419	0.263788	0.225453	0.242942	0.0532496	-0.131752	-0.011458
RHOC	-0.106654	0.024912	0.147515	0.133819	-0.0165668	0.300272	0.0472223	0.0819921	-0.0275919	0.054938	0.0960108
MMP2	-0.0601395	0.0525546	-0.0785942	-0.37084	-0.802375	0.00967672	0.609839	0.836093	0.348032	-0.357355	-0.0676556
CD63	0.3074	0.438554	0.686096	0.750042	0.2917	2.19549	-0.125477	0.147163	-0.0846532	-0.163982	-0.147665
ENO2	-0.167475	-0.118855	-0.143953	-0.146248	0.144643	0.791023	-0.0388799	-0.11793	-0.159778	-0.427333	-0.24466
HMGB1	-0.861943	-1.12772	-1.02669	-1.23981	-1.09078	-2.36399	-0.390954	-0.523761	-0.336246	-0.0804765	-0.167094
CLTA	0.243299	0.447756	0.195599	0.434513	0.309481	0.524176	-0.140625	0.16798	-0.0329309	-0.0970185	-0.416147
PET100	-0.613805	-0.62994	-0.563224	-0.515655	-0.682157	-0.971107	-0.0224345	-0.0919088	-0.141996	-0.0676382	-0.132437
DLAT	0.0741234	0.0401262	-0.014968	0.00163328	0.151558	0.643402	-0.283879	-0.162163	-0.328379	-0.345976	-0.335348
PTPRF	-0.157888	-0.281436	-0.295802	-0.475819	-0.124759	-0.255047	0.0970435	0.0138046	-0.00609323	-0.108255	0.0108424
NR2F6	-0.252104	-0.294729	-0.436791	-0.223729	-0.102864	-0.425081	-0.169111	-0.05246	0.0324019	-0.0115851	0.295878
BCR	0.2445	0.355721	0.385583	0.43533	0.464666	0.684137	0.188286	0.16958	0.197025	0.13844	0.140908
IGF2R	0.120307	0.326122	0.271499	0.0613496	0.00250192	0.3513	0.0998683	0.294602	0.148825	-0.0337857	0.143747
FGF5	0.114664	-0.315222	0.210581	-0.31467	-0.564129	-1.89942	0.288325	0.0201762	0.0569177	0.254494	0.337761
HARS	-0.029444	0.0790846	0.0908761	0.118991	0.0799967	-0.0113748	-0.161207	-0.125267	-0.117217	-0.0643661	-0.133851
XRCC6	-0.540608	-0.41741	-0.556437	-0.656916	-0.615429	-1.42669	-0.372994	-0.496092	-0.363961	-0.116919	-0.198203
GSPT1	-0.15578	-0.0457508	-0.0474648	-0.0695677	-0.192989	-0.236965	0.0657534	0.0348598	0.060728	0.00313776	0.0767947
CD46	-0.238206	0.324454	0.109536	0.172432	0.224891	0.224497	-0.0749054	0.125758	0.126919	0.092957	0.240082
CD46.1	0.398395	0.32057	0.457483	0.34375	0.237206	0.554064	0.272451	0.562403	0.533801	0.371675	0.511812
COX7C	0.243039	0.227712	0.320047	0.279665	0.139325	0.426134	0.380448	0.785352	0.622491	0.391364	0.458751
CREB1	-0.393876	-0.718455	-0.718614	-0.666319	-0.548007	-1.30471	-0.399929	-0.649366	-0.549045	-0.397488	-0.213745
PDGFRA	-0.746533	-1.02938	-1.07949	-1.70296	-1.14012	-1.32752	0.4159	0.536957	0.352207	0.1988	0.0550703
ENG	0.312121	0.22429	0.310299	0.104491	0.0430249	-0.369615	0.0922657	0.0927586	0.00706758	-0.215068	-0.0903849
POLR2C	-0.172959	-0.267343	-0.253501	-0.272094	-0.301812	-0.614026	0.000945083	-0.0371492	-0.09418	0.0284378	-0.0685338
GGT1	0.695113	1.15281	1.42347	1.90976	1.5534	3.51343	0.0542012	-0.00440802	0.0198429	0.0710271	0.044168
ITIH1	NA	NA	NA	-0.0122834	-0.699157	-0.192455	-0.00993812	0.239523	0.433229	NA	NA
SCP2	0.247069	0.374723	0.312064	0.34338	0.23884	0.682724	-0.0959734	0.0366893	-0.0842258	-0.129936	-0.0690943
FBLN1	-0.262027	-0.622238	-0.457363	-0.426363	0.0770684	-0.52353	0.686605	0.574087	0.805439	1.0261	0.673033
TCEA1	-0.45656	-0.547838	-0.601188	-0.684525	-0.676312	-1.63801	-0.547063	-0.821573	-0.634151	-0.486944	-0.416579
ITGA6	0.0612385	0.0631476	0.0856128	0.0299697	-0.316405	-0.411331	-0.0163548	-0.0590969	-0.133884	-0.357995	-0.0993525
COX7A1	0.567092	0.653885	0.506198	0.523584	-0.340406	0.577104	0.404046	1.2567	1.04328	0.365958	0.556687
CHM	-0.102902	0.140974	0.0114003	-0.0592117	-0.167685	-0.206878	0.0448245	0.119524	-0.120432	-0.100959	-0.0495714
MCM3	-0.736959	-1.56874	-1.26279	-1.46168	-1.60452	-3.63276	-0.0605898	-0.383264	-0.291691	-0.0946823	-0.283735
RPS12	0.0228838	-0.186743	-0.225306	-0.29129	-0.168971	-0.431836	-0.207469	-0.296899	-0.27639	-0.114768	-0.242864
DNMT1	-0.851681	-1.42055	-1.25501	-1.42479	-1.51065	-2.83943	-0.0462053	-0.491243	-0.255605	-0.133176	-0.0421322
PSMB8	0.0781657	0.0946339	0.299037	0.368138	0.336526	0.422119	-0.0937995	-0.053831	-0.17723	-0.120984	-0.131589
PSMB9	-0.123518	-0.135167	0.122384	0.29232	0.660709	0.0277364	-0.386891	-0.578653	-0.866461	-0.489089	-0.71692
TEAD1	-0.422648	-0.819743	-0.678494	-0.723716	-0.566313	-1.04635	-0.18862	-0.39072	-0.272478	-0.264488	0.0709883
RXRB	-0.247677	-0.605648	-0.561631	-0.509116	-0.554149	-1.16526	0.0351137	-0.11447	0.0582693	0.349994	0.227722
MARCKS	0.243385	-0.341243	-0.00784547	-0.18186	-0.0370066	-0.369007	0.256018	0.305847	0.649637	0.597914	0.512254
ALDH4A1	0.223166	0.519069	0.553505	0.789091	0.744299	1.91996	0.183923	0.347584	0.0523345	-0.10916	-0.110623
PRDX5	0.403691	0.728535	0.698746	0.857115	0.817904	1.34219	0.126794	0.375162	0.294788	0.103102	0.0717831
CDC25B	-0.407896	-1.1641	-0.484015	-0.678647	-1.21429	-1.48566	-0.041548	-0.239785	-0.139707	-0.379106	-0.212431
NMT1	0.265586	0.150011	0.105021	0.322678	0.31302	0.578576	2.29058e-05	-0.0459864	-0.117318	-0.158858	-0.154351
MAT2A	-0.276416	-0.484176	-0.453482	-0.487529	-0.517861	-0.749834	-0.0328479	-0.149573	-0.00786918	-0.0445686	-0.0979494
SDC4	-0.0645524	-0.114327	-0.161097	-0.457024	-0.116677	-0.329076	0.482264	0.447156	0.383304	-0.106575	-0.0682529
STX2	0.171552	0.417888	0.3272	0.234502	0.509869	0.673527	-0.304025	-0.277147	-0.250906	-0.0747427	-0.169505
MCM7	-0.700789	-1.4453	-1.32038	-1.48298	-1.56797	-3.76464	-0.295729	-0.715635	-0.65366	-0.28045	-0.406576
EVI2B	-0.468729	-0.783631	-0.639061	-0.73502	-1.43378	-1.33634	0.04261	0.0125491	-0.111534	-0.434526	0.00491953
MPI	0.359658	0.576192	0.515533	0.647805	0.484315	1.3342	0.098413	0.158961	0.0511856	-0.13774	-0.16944
RFC4	-0.616194	-1.14686	-0.91537	-1.20386	-1.16923	-2.51938	-0.257494	-0.416062	-0.19634	-0.135885	-0.115828
ADD1.1	0.39831	0.220835	0.198624	0.457255	0.56928	0.1372	0.0175143	0.244629	-0.147055	0.0838913	-0.227471
HMGCL	0.33199	0.519816	0.617535	0.715801	0.543282	1.72059	-0.0473675	0.185376	0.00590338	-0.035669	-0.0215885
BMPR1A	-0.241931	-0.217987	-0.206548	-0.526833	-0.648807	-0.677314	0.0225908	0.17246	0.0294902	-0.142379	-0.0213747
HSD17B2	0.231377	0.10728	0.285109	0.0980043	-0.172561	0.710961	1.64696	2.74763	2.27096	1.97115	1.78829
SRP14	-0.557656	-0.532274	-0.623575	-0.736155	-0.584342	-0.996791	-0.40044	-0.296382	-0.258164	-0.150408	-0.113225
COL18A1	-0.091589	-0.275918	0.0431201	0.0966122	0.547251	0.183343	-0.0518083	0.218821	0.202332	1.06019	0.680709
STAT3	0.302348	0.57677	0.512095	0.606737	0.605584	1.13108	-0.165465	-0.0802023	-0.198336	-0.0843436	-0.146353
CETN2	-0.628736	-0.249245	-0.390702	0.0269693	0.0466199	-0.00838266	-0.220378	-0.368143	-0.270155	-0.296033	-0.397999
PRKCI	-0.0169436	-0.0532169	0.0274853	0.0229876	0.0956516	-0.204512	0.122154	0.314869	0.272491	0.251819	0.255582
CDKN2C	-0.724711	-1.19573	-0.899224	-1.18836	-0.871773	-1.8396	-0.102801	-0.0339089	-0.071179	0.189251	0.246645
PRCP	0.312189	0.388424	0.350764	0.527281	0.589064	2.08753	-0.247583	-0.0774239	-0.0667209	0.118732	-0.175105
PTGER2	0.216934	0.00435207	0.156447	0.0182895	-0.342762	-1.55093	NA	NA	NA	NA	NA
CTSO	0.234534	0.622439	0.639989	0.91545	0.886953	2.07216	NA	NA	NA	NA	NA
MAP2K3	0.316086	0.50782	0.410422	0.378441	-0.0275225	0.323246	0.113529	0.178105	0.204597	-0.037481	-0.00778663
BRCC3	0.107776	-0.203001	0.0591125	0.144964	0.0680171	0.433814	0.623485	0.514586	0.463364	0.231614	0.234428
RPL28	-0.233048	-0.0270351	-0.169355	-0.381063	-0.276039	-0.725757	-0.467022	-0.401894	-0.118767	-0.168845	-0.155324
RABIF	0.0685589	0.0957901	0.141349	0.0446039	-0.0520494	0.255191	0.200656	0.292407	0.272294	0.300291	0.467161
ATP5O	0.0176266	0.362558	0.23404	0.437747	0.289513	1.00485	-0.041908	0.0971811	-0.0463446	-0.0933687	-0.0800355
PIP4K2A	-0.101798	0.167635	0.0785722	0.265465	-0.0920826	0.130899	0.395567	0.410739	0.32379	0.0488954	0.387289
MASP1	-0.00623045	-0.0591674	0.0189509	0.459113	0.965235	1.55622	0.857021	1.16281	1.00542	1.34359	0.617872
CD97	-0.140287	-0.0615487	-0.23874	-0.323956	-0.145793	-0.537957	0.159004	0.260978	0.224444	0.123982	0.32192
DNASE1L1	0.717184	1.056	1.03538	1.30312	1.58388	2.19043	-0.0199962	0.188274	0.116058	0.0104406	0.125716
ARRB1	0.423127	0.584047	0.760038	0.733174	0.840479	1.93342	0.179577	0.651184	0.497522	0.720934	-0.0754581
CDC34	0.291093	0.186438	0.282637	0.182113	0.0353093	0.355587	0.104213	0.0516415	-0.078207	-0.264211	-0.0585303
PRIM2	-0.878422	-1.5978	-1.30689	-1.54842	-1.72948	-3.22775	-0.261428	-0.578301	-0.448912	-0.411633	-0.385184
PSMB3	0.00910603	0.075942	0.133949	0.0624478	-0.068637	0.354993	-0.146711	-0.0767567	-0.196567	-0.194364	-0.209297
MCM2	-0.739987	-1.45449	-1.2104	-1.53682	-1.64801	-3.72816	-0.119732	-0.510566	-0.370104	-0.149098	-0.285365
NUDT2	0.0860899	0.0669669	0.128567	-0.0248232	0.00260783	0.347364	-0.111331	0.02819	0.00646222	0.0263612	0.022452
RAB28	-0.108842	-0.05586	0.0364135	0.0495691	-0.0541791	0.168755	-0.1939	-0.129205	-0.192679	-0.157436	-0.0927986
PLXNA3	0.214126	0.403542	0.368019	0.389833	0.41144	0.924203	0.0772946	0.370043	0.208624	-0.036026	0.115037
UBE2E1	-0.271113	-0.537579	-0.596712	-0.710829	-0.685449	-1.32431	-0.151166	-0.333916	-0.25224	-0.418778	-0.243688
HNRNPM	-0.307358	-0.469311	-0.482869	-0.491171	-0.388682	-0.990868	-0.0530175	-0.110174	0.0329582	0.131794	0.032227
SMS	-0.133682	-0.0652142	0.0124276	0.0907754	0.262524	0.541229	-0.0774216	-0.18037	-0.171806	-0.140125	-0.247702
EFNB2	-0.0357791	-0.303399	-0.161348	-0.74586	-0.70177	-1.30944	0.383832	0.403803	0.244153	-0.251897	-0.106505
MVD	0.282816	0.375858	0.359011	0.460749	0.399801	0.954519	0.196053	0.313849	0.195826	-0.256927	-0.0987469
HCCS	-0.0707827	-0.141533	0.00762913	-0.189202	-0.31473	-0.189661	0.132259	-0.0800257	-0.174075	0.0487606	0.00320633
TTC3	-0.230904	-0.494018	-0.343093	-0.396543	-0.393378	0.309664	-0.0692151	0.143678	0.307753	0.201532	0.0853034
BLM	-0.429569	-1.2993	-0.918957	-0.95189	-1.36067	-2.29154	-0.248427	-0.315864	-0.307895	-0.217982	-0.0986448
USP14	0.135035	0.314216	0.237764	0.256196	0.203114	0.438214	-0.069712	-0.0304445	-0.063117	-0.00312505	-0.040872
AK2	0.231491	0.0761568	0.167167	0.227206	0.0125354	0.726491	0.249725	0.41467	0.440804	0.165133	0.123591
ALDH18A1	0.121596	0.113239	0.163676	0.179628	0.299271	0.271136	-0.0917788	-0.072539	0.00121501	0.115136	0.0598905
EIF5	-0.160169	-0.26036	-0.202827	-0.183053	-0.144132	-0.535003	-0.120077	-0.178563	-0.0622874	0.107979	0.0124588
GFER	-0.335285	-0.435997	-0.394232	-0.319158	-0.258693	0.218458	-0.231496	-0.213722	-0.170573	0.110396	0.00325473
HNRNPH2	0.0992573	0.0844058	0.0511654	-0.00507621	0.0652847	0.153949	-0.195244	-0.0662709	-0.247455	-0.236296	-0.263535
EVC	-0.298993	0.220963	0.472263	1.3409	1.56856	2.01723	-0.325468	-0.442501	NA	NA	NA
LOXL3	-0.0513186	-0.501614	-0.848398	-0.172085	-0.125061	-1.08613	-0.0140034	0.0444047	0.0657859	0.655916	0.119108
ADAMTS12	0.883967	1.08611	1.22157	1.40134	1.61053	1.56194	0.0245051	-0.139885	-0.238019	-0.477177	-0.395319
RAB2A	0.185832	0.296818	0.24019	0.141864	0.0758109	0.277034	-0.151033	0.0576339	0.0316803	-0.0671624	0.0601638
ACTR2	0.00484558	0.447672	0.218517	0.292512	0.295107	0.502342	-0.359439	-0.237511	-0.341443	-0.217477	-0.263519
ABCE1	0.0029585	-0.155853	-0.0617923	-0.130167	-0.129934	-0.158835	-0.0999421	-0.160123	-0.0924573	-0.0964161	-0.0765798
HSPE1	-0.127412	0.340853	-0.0226959	0.171247	0.219409	0.331351	-0.432046	-0.443697	-0.35823	-0.358392	-0.305355
STXBP1	0.357757	0.564649	0.616401	0.643089	0.505757	1.48688	0.0706851	0.319518	0.219057	-0.0522249	0.0772099
DCAF7	-0.258085	-0.372644	-0.339907	-0.252773	-0.233497	-0.30811	-0.0702197	-0.175194	-0.137694	-0.0364929	-0.149067
RPS7	-0.261825	-0.0956441	-0.171344	-0.332817	-0.246109	-0.755046	-0.406156	-0.327514	-0.295729	-0.255164	-0.116386
RPS16	-0.0583112	-0.241064	-0.192886	-0.238348	-0.268691	-0.378897	-0.336878	-0.29268	-0.352054	-0.324664	-0.246913
SELENOT	-0.0692651	0.193829	0.146318	0.125798	-0.0962052	0.429132	-0.415003	-0.515257	-0.486292	-0.408422	-0.470057
RPL7A	-0.284813	-0.126688	-0.222676	-0.253502	-0.203841	-0.571031	-0.152214	-0.293935	-0.174094	-0.0321859	-0.0732276
RPS24	-0.125013	0.0325079	0.077416	-0.0878066	-0.227155	-0.418094	-0.028094	-0.0769688	0.024179	0.141898	0.140257
POLR2L	-0.221732	-0.290966	-0.134544	-0.346972	-0.538898	-0.806488	0.184616	-0.00605954	0.104014	0.107272	0.120076
PPIA	0.210931	0.21514	0.199426	0.180837	0.00281501	0.69293	-0.348284	-0.289592	-0.237601	-0.348504	-0.10675
RAC1	-0.136907	0.0300391	0.0296564	0.0284461	-0.0558207	0.0695014	0.142584	0.105839	0.0432548	0.0648166	0.0615208
UBE2B	-0.0667279	-0.013222	-0.0224696	0.146748	0.120069	0.340763	-0.158946	-0.180048	-0.252365	-0.2859	-0.2803
RPP30	-0.171643	-0.273656	-0.23763	-0.32287	-0.330935	-0.662957	0.0565632	-0.0974739	-0.0663304	-0.0389077	0.0357368
ST5	0.150481	0.120891	0.0531215	0.0934726	0.0536094	0.23239	0.173359	0.395313	0.203539	0.449334	0.295904
BLOC1S1	0.0839349	0.288585	0.196313	0.233321	0.319905	0.951178	0.176482	0.201209	0.0805028	0.155249	0.159438
MRPS15	-0.246326	-0.156735	-0.00226051	-0.0671451	-0.206221	-0.344106	0.197984	0.339849	0.364633	0.232873	0.180789
MXRA7	0.74564	1.21471	1.05139	1.34598	0.755455	1.90004	-0.0214197	0.502691	0.203909	0.317185	-0.15521
VLDLR	-0.16893	-0.167259	-0.233645	-0.280514	-0.357597	-0.26907	0.022211	0.260084	0.0295557	0.015308	0.102778
EFNB1	-0.00994233	0.18158	-0.0100324	0.133577	0.389125	0.584453	0.339603	0.404949	0.295415	0.229012	-0.0258434
HNRNPU	-0.300526	-0.6223	-0.606747	-0.574345	-0.451844	-1.09345	-0.080704	-0.262804	-0.234813	-0.0160986	-0.0849702
TIAL1	-0.0545067	-0.260773	-0.123879	-0.262209	-0.331367	-0.509763	0.14706	0.0765313	0.0705118	0.177884	0.203069
OCRL	0.113901	0.207732	0.226241	0.199803	0.121847	0.495778	-0.205304	-0.17392	-0.18765	-0.09254	-0.10216
PLCB3	-0.0115189	-0.0584671	0.0217951	-0.00905565	0.0262532	0.204398	0.0603757	0.213257	0.26989	0.250592	0.23139
AKAP17A	0.207581	-0.112019	-0.0333248	-0.240321	-0.140353	-0.674442	-0.0164487	-0.183344	-0.00944065	0.278331	0.214626
PLOD1	0.284948	0.412009	0.451701	0.635236	0.580766	0.69626	-0.029541	0.0542824	0.076304	0.102733	0.0520185
TOP2B	-0.243776	-0.692409	-0.494254	-0.495013	-0.412327	-1.04321	0.0715278	-0.0780774	-0.097326	0.0752431	-0.012171
GNA12	0.0541099	0.0445619	-0.0744563	-0.13662	-0.064948	-0.105758	-0.430487	-0.323632	-0.295654	-0.262565	-0.477253
ERCC6	0.18966	0.155162	0.0851197	0.103698	-0.0809699	0.0425699	-0.0541209	-0.161119	-0.118452	-0.155527	-0.0228911
CEBPZ	-0.307037	-0.560668	-0.572206	-0.669339	-0.691876	-0.99389	0.0906675	0.0138075	0.0259895	0.0211338	0.00874874
CSTF1	-0.0425062	-0.23575	-0.193678	-0.216761	-0.220552	-0.5157	-0.0960725	-0.127511	-0.0606936	0.0894514	-0.0651003
RNASEL	0.156549	0.335416	0.447485	0.475304	0.289392	0.256419	-0.100521	-0.0359222	-0.158686	-0.214332	-0.210528
BAX	-0.0561456	0.0471498	-0.00757867	0.0865437	0.141308	0.350799	0.00254728	-0.0417606	0.00738382	0.016905	-0.0284331
KLC1	0.674384	0.930339	0.940145	0.993471	1.31711	1.51835	0.333043	0.179062	0.360579	0.662254	0.366886
CACNB2	-0.0218347	-0.0905371	0.275465	0.0941561	0.29435	0.334412	0.304048	0.251312	NA	NA	NA
PUDP	0.0933223	0.176974	0.206687	0.256479	0.1276	0.503982	-0.0698725	-0.0768422	-0.142975	-0.132754	-0.232297
CD47	-0.161757	0.0496591	0.172049	0.196959	-0.0610931	0.88581	-0.0932035	-0.160441	0.0855366	-0.128846	-0.0541548
DMWD	0.142136	0.352095	-0.0573374	0.257299	0.347041	0.686929	0.101192	0.0362955	0.0697558	0.110988	0.0387169
RBBP4	-0.350786	-0.913756	-0.686843	-0.851507	-0.819416	-1.24783	-0.275779	-0.246744	-0.212738	-0.0372082	-0.130182
SMAGP	-0.181306	0.11244	0.087326	-0.406982	-0.0665721	-1.37127	NA	NA	NA	NA	NA
ST3GAL1	0.203276	0.0791384	0.136668	-0.239639	-0.250237	-0.580183	-0.0124452	0.328914	0.159244	0.415869	0.418616
HMGXB3	0.0866827	0.461956	-0.0618849	0.0423905	-0.236418	-0.435967	NA	NA	NA	NA	NA
AKAP13	0.175556	0.179903	0.230604	0.292627	0.297643	0.380374	0.0462761	-0.0143557	0.111773	0.0356738	0.0684222
CDC20	-0.819988	-1.79217	-1.44165	-1.54157	-1.72783	-3.35382	0.0462165	-0.375291	-0.211716	-0.404544	0.126935
SFSWAP	-0.426365	-0.828172	-0.717242	-0.693175	-0.625578	-1.30672	-0.0319092	-0.13215	-0.0786754	0.0486961	-0.110342
FLII	-0.00885537	-0.00177439	-0.0122422	-0.0808475	0.0324633	-0.198227	-0.102262	-0.098751	-0.13493	-0.0682477	-0.0356853
COASY	-0.216422	0.00309964	-0.23007	-0.0223437	-0.194094	0.106711	-0.384077	-0.0292835	0.00621782	-0.0435426	-0.163993
HNRNPA0	-0.385143	-0.693734	-0.686004	-0.888274	-0.915792	-1.62513	-0.182401	-0.362976	-0.214623	0.0170886	-0.170251
PRDX4	0.218775	0.622964	0.46519	0.551472	0.622141	1.27525	-0.102791	-0.12625	-0.166028	0.0403157	0.0371882
TRIM28	-0.266562	-0.528141	-0.430933	-0.594742	-0.512721	-1.05141	0.0277231	-0.114021	-0.0278569	0.111186	0.084706
NMI	0.00956912	0.178183	0.183474	0.274028	0.39243	-0.360432	-0.0205126	0.211499	0.209309	0.438353	0.117203
PTK7	0.202168	0.281424	0.246877	0.313956	0.391657	0.325465	0.198057	0.500643	0.362555	0.512532	0.289419
SLC14A1	0.184833	-0.0262961	0.437096	1.02714	1.39708	1.52636	0.652892	0.843817	1.01318	1.44276	1.48726
DYNC1I2	0.0935039	0.26913	0.266523	0.370887	0.325748	0.503981	-0.00779101	0.0197179	0.0169823	-0.0201668	0.0313255
TCOF1	-0.200296	-0.412913	-0.382282	-0.395604	-0.374199	-0.316892	0.0981279	-0.0944088	0.0485428	0.12332	0.0792956
SLC39A6	0.270708	0.174617	0.228574	0.366589	0.396576	0.800996	0.271695	0.479751	0.204425	-0.0274905	0.135801
TCIRG1	0.281139	0.594084	0.596717	0.614795	0.452937	1.42133	-0.0315813	-0.0178003	-0.0591347	-0.17722	-0.138262
EIF4EBP1	0.472631	0.386417	0.0444969	0.303464	0.386332	-0.16256	0.69411	0.279447	0.939657	1.21767	0.979037
CAMK2G	0.369595	0.487653	0.66656	0.569108	0.500976	1.15461	0.103204	0.172318	0.173233	0.257948	0.252588
MTMR2	0.0189485	0.0131714	-0.187734	-0.0617612	0.202077	0.0242229	-0.120295	-0.30071	-0.270975	0.0469135	0.139382
DYRK1A	-0.121709	-0.248415	-0.135372	-0.299375	-0.409093	-0.347044	-0.0237699	0.0165269	-0.0654784	-0.0285733	0.0245065
FHL1	0.533754	0.525401	0.574557	0.383791	0.710762	1.24098	0.176502	0.385788	0.401993	0.588898	0.312487
FHL3	0.0975018	0.117795	0.190496	0.208338	0.425976	0.692802	0.0581419	0.15558	0.119295	0.170518	0.145228
THOC5	-0.180659	-0.633107	-0.51726	-0.597555	-0.530688	-1.05338	-0.018293	-0.0308341	-0.0876213	-0.0464779	0.046837
GTF2H3	-0.213726	-0.287523	-0.200765	-0.284978	-0.384629	-0.568366	0.0636824	-0.0567564	-0.0858137	-0.040611	0.188746
NID2	0.333819	0.47875	0.564043	0.747211	0.793613	0.58836	0.208799	0.411602	0.349966	0.435813	0.294569
LRP8	-0.280579	-0.152507	-0.155204	-0.309344	0.0147654	0.0593621	0.191725	0.202497	0.159674	-0.182994	0.0188216
EIF3A	-0.059031	-0.0193114	-0.131805	-0.103657	-0.0512412	-0.266425	-0.174758	-0.275164	-0.198482	-0.156092	-0.115578
UBAP2L	-0.128061	0.0488579	0.544315	-0.19233	-0.00495654	-0.954412	0.147593	-0.18138	-0.407299	-0.425257	-0.613891
POLA2	-0.736193	-1.26475	-1.01318	-1.22069	-1.48604	-2.1572	-0.246765	-0.660433	-0.563061	-0.572444	-0.360812
CAPRIN1	-0.0334155	-0.193684	-0.235478	-0.186631	-0.207056	-0.634857	0.0903432	-0.0335864	0.0884684	0.171143	0.201768
HLTF	-0.429898	-0.710039	-0.68069	-0.587233	-0.577029	-0.81928	-0.0717995	-0.193541	-0.0676473	-0.0541169	0.207698
KANK1	0.0863658	0.103586	0.125996	0.122734	-0.00908165	-0.00667916	0.208371	0.306655	0.334402	0.342201	0.564013
KCTD2	-0.146753	-0.227347	-0.222764	-0.429682	-0.50328	-0.536113	NA	NA	NA	NA	NA
RFTN1	1.32932	0.843874	0.207454	0.256808	0.790235	2.07372	-0.91851	0.19854	-0.243162	-0.151132	-0.219336
PPP2R5D	-0.0198197	-0.0453465	-0.0267405	0.0532363	0.0676565	0.22979	-0.0539657	-0.0981657	-0.0424498	-0.0119068	-0.00881583
KIF22	-1.03122	-1.86253	-1.59119	-2.12516	-2.29598	-3.3457	-0.12354	-0.485438	-0.476841	-0.424242	0.0543222
PSMD6	0.0134776	0.388206	0.227206	0.108098	0.103183	0.156089	-0.473745	-0.412894	-0.2842	-0.349944	-0.318892
LRRC14	-0.0177436	0.107295	0.121773	0.232903	0.0612211	0.557127	0.0129234	0.108926	-0.125698	-0.079987	-0.0827972
PDK1	0.0192923	-0.0089048	0.028772	-0.136911	-0.522108	0.214898	0.0626576	0.202774	0.0547715	0.0695278	0.22015
PGM5	0.496147	0.601499	0.394419	0.584385	0.722089	1.49145	-0.152842	0.022152	-0.0663693	-0.101828	-0.102942
PMVK	-0.0108935	0.0101378	-0.0077887	-0.0837531	-0.101419	0.23118	0.126733	0.239409	0.169406	0.106672	0.0398084
PLEC.1	0.391919	0.652931	0.604236	0.79369	0.967517	1.12641	0.175896	0.417151	0.564105	0.37936	0.485334
PLEC.2	-0.33578	0.35043	-0.220597	-0.0253224	0.334894	0.568237	0.601544	1.18206	1.05578	1.004	1.0789
PTPRK	0.142513	0.145441	0.267286	0.147405	0.115001	0.845034	0.43312	0.716975	0.553172	0.153517	0.2113
PWP2	-0.249007	-0.513976	-0.538028	-0.612552	-0.61622	-0.871479	-0.0457956	-0.0882613	-0.080938	-0.157817	-0.13767
LLGL1	0.132264	0.0751808	0.134582	0.30683	0.34888	0.491458	0.272273	0.321686	0.333086	0.410496	0.282356
PUM3	-0.294212	-0.521489	-0.35146	-0.563366	-0.615783	-0.94726	0.0234372	-0.145071	-0.110542	-0.109327	-0.107168
RPS6KA1	-0.0192241	-0.132973	-0.0870591	-0.1549	-0.201099	-0.326621	0.18701	0.225755	0.144989	0.236807	0.147885
NCOA2	-0.139128	-0.264588	-0.270363	-0.110585	-0.104989	-0.511211	0.0891436	0.131682	0.236161	0.281164	0.283171
TSN	-0.19579	-0.0729978	-0.00276475	-0.0125921	-0.289451	0.169541	0.112333	0.119844	0.117015	-0.0429227	-0.166657
TRIP6	0.0559319	0.0611064	0.0431506	0.0152952	0.0850063	-0.119137	0.103466	0.10058	0.0440149	0.0760465	0.153337
TWIST1	-0.676053	-0.837912	-0.893032	-1.13922	-0.717937	-2.57811	0.146753	-0.140109	0.0363212	0.10922	0.613507
TSC22D1	0.503872	0.763858	0.642995	0.713179	0.776215	0.996372	0.293185	0.522794	0.484447	0.478925	0.383228
SMAD2	0.0620868	-0.0265147	0.138416	-0.075299	-0.0564973	0.150049	0.0370214	-0.108285	0.0824997	0.188287	0.181648
TBCE	0.013104	0.0936341	0.148126	0.13833	0.000622017	0.19367	0.0702984	0.0909509	0.0236092	-0.010935	0.0234044
ETFDH	0.571292	0.695795	0.727186	0.962743	0.835825	1.72879	-0.0212043	0.139348	0.113185	-0.00843803	-0.0824112
IGFBP7	0.620403	1.46231	1.61903	2.02447	1.84689	3.9622	0.728919	1.09399	0.977098	0.641561	0.800209
SNRNP35	-0.548192	-0.762267	-0.719275	-0.973211	-0.749572	-1.24382	-0.0570575	-0.261035	-0.257572	-0.407598	-0.293355
FXN	0.214937	0.0997416	0.0847246	0.213794	0.0598895	0.345691	0.247947	0.138469	0.106268	0.0462472	0.0733564
DBN1	0.447979	0.553728	0.484534	0.614258	0.724424	0.735052	0.273408	0.191773	0.366858	0.45009	0.285633
TST	0.61211	0.886838	0.978502	1.23037	1.25817	1.7225	-0.0576353	0.159414	0.179856	0.219609	0.0716994
UBE2S	-0.906452	-1.27387	-1.28813	-1.61401	-1.65358	-2.1708	-0.280548	-0.747014	-0.498527	-0.701719	-0.475606
ME3	-0.187283	-0.0432145	-0.19497	-0.260967	-0.763391	0.00743143	0.0444543	-0.0521977	-0.131937	0.0311057	-0.367461
UPP1	-0.116125	0.231418	0.0274408	0.1523	-0.0881064	1.14931	-0.176555	-0.425358	-0.639939	-0.828485	-0.760967
ATP6V1F	0.0932875	0.532687	0.41475	0.664689	0.388646	1.26844	0.0403987	0.195813	0.0976206	-0.266562	-0.305854
CLEC16A	0.220851	0.155231	0.0490985	0.185784	0.164829	0.258611	0.139691	0.121115	0.155596	0.171879	0.159466
UVSSA	NA	NA	NA	0.0428514	0.0207214	-0.224488	-0.0543839	-0.019763	0.378515	NA	NA
CHD9	-0.345863	-0.597216	-0.270833	-0.568757	-0.648015	-0.971313	0.317397	0.197134	0.240497	-0.0387892	0.115209
ITPRIPL2	-0.123363	-0.0780226	-0.0847613	-0.247063	-0.435396	0.486125	0.0981081	0.351426	0.0641943	-0.17795	0.174933
TMEM259	0.205187	0.242328	0.254858	0.230601	0.385413	0.783222	-0.0641244	-0.0693859	-0.104281	-0.0387888	-0.0664711
ARHGAP29	0.179421	-0.0558714	0.127586	0.125798	0.140749	-0.433366	-0.113938	-0.423915	-0.215192	-0.24211	-0.331136
TMEM35A	0.529006	0.873686	0.934467	1.08169	0.768229	1.65487	0.341273	0.627896	0.735154	0.422777	0.45004
AGK	0.254552	0.017677	0.185384	0.159137	0.198951	0.806767	0.00808632	0.112927	0.0381786	0.0759731	0.102071
CDCA8	-1.0152	-2.07976	-1.56007	-1.84624	-1.98433	-3.92246	-0.251994	-0.699004	-0.623869	-0.631807	-0.206889
C3orf38	0.0336419	-0.224637	-0.231824	-0.334436	-0.339751	-0.374286	0.157796	0.247909	0.283542	0.194645	0.285541
RRP12	-0.26183	-0.424478	-0.434999	-0.585764	-0.652343	-0.921661	-0.0302409	-0.0634782	-0.0717951	-0.10933	-0.0370751
AARS2	-0.0613536	-0.0836798	-0.153326	-0.191761	-0.222274	-0.304143	0.0450838	-0.0206088	-0.0729319	-0.0976736	-0.056199
WDR45B	0.230649	0.231763	0.325988	0.179786	0.105073	0.63571	0.0613511	0.28325	0.204676	0.177519	0.27499
BRMS1L	-0.591278	-0.534195	-0.845806	-0.658407	-1.10216	-1.35036	NA	NA	NA	NA	NA
MANEA	0.0159177	-0.200587	-0.260802	-0.515716	-0.390773	-0.745888	0.143328	-0.0297681	0.0539283	0.0387437	0.0886498
OTUD3	0.395573	0.877329	0.594885	0.593178	0.238814	0.63123	0.223057	0.331675	0.434838	0.253067	0.149941
TMEM63B	0.337465	0.680349	0.503458	0.69415	0.577377	1.76385	0.111257	0.376446	0.3001	-0.172465	-0.0994622
RBM26	-0.532749	-1.00091	-0.766861	-0.862692	-1.03329	-1.68625	NA	NA	NA	NA	NA
WLS	-0.0445291	-0.0228401	0.0254932	-0.0549082	0.0225503	0.669546	0.0286795	0.0549308	-0.20726	-0.208666	-0.215254
MAGI3	-0.207714	-0.402983	-0.284347	-0.480699	-0.389655	-0.738209	0.0877085	-0.136315	0.0398884	0.223611	0.255531
NT5DC1	0.103198	0.048936	0.0841293	0.00317604	-0.0641123	0.0502923	-0.071197	-0.0119537	-0.071545	-0.151809	-0.111241
AHDC1	0.0125744	-0.342607	-0.176196	-0.29658	-0.284403	-0.883759	0.255646	0.0885058	0.302683	0.452311	0.360901
MINOS1	0.464447	0.298347	0.170772	0.350905	0.202593	1.33998	-0.130878	0.0894253	-0.162583	-0.097231	-0.182309
VPS13D	0.0099218	0.0989947	0.106875	0.17177	0.0214227	0.515327	0.00541577	0.100191	0.0794588	-0.0768956	-0.0327218
MEX3C	0.0130407	-0.388149	-0.514193	-0.335642	-0.216023	-0.266043	0.289181	0.086185	-0.0609575	0.240809	0.1708
TTC39B	0.174271	0.0886551	0.240858	0.222521	0.0396877	0.222331	-0.0250574	-0.0434171	-0.146217	-0.104297	-0.186954
LYPLAL1	0.213941	0.37641	0.459091	0.586411	0.226215	1.46313	0.039789	0.262058	0.205235	-0.0179192	0.101158
CHIC1	-0.0360252	0.61038	0.497248	0.169853	-0.2029	0.327242	-0.0354322	-0.0802918	-0.374097	-0.303883	-0.484314
PEAR1	0.357359	0.441041	0.331712	0.139526	0.0773422	-0.850154	0.0724692	-0.058931	-0.213706	-0.384506	-0.236082
KANK2	-0.0680572	-0.133333	-0.177764	-0.1528	0.06185	0.130809	0.0353819	0.0743768	0.105966	0.155275	0.0884219
HAUS3	-0.454399	-1.10745	-1.0516	-1.12846	-1.19308	-2.15717	-0.0300611	-0.228782	-0.141919	-0.207734	-0.304199
SPECC1L	0.15072	0.250184	0.22993	0.34698	0.37999	0.697621	-0.000936817	-0.00225282	-0.0350559	-0.0247104	0.0132734
THOC7	-0.377359	-0.582106	-0.554014	-0.667937	-0.712104	-1.28678	-0.0282216	-0.194318	-0.0434648	0.060379	0.0672687
SNRNP48	NA	NA	NA	-0.745179	-0.721176	-1.00585	0.271418	0.0680041	-0.0327496	NA	NA
MRM1	0.153568	-0.316764	-0.389702	-0.209213	-0.448183	-0.679391	-0.123179	-0.0971487	-0.127435	-0.163652	0.266633
TYW3	-0.0302482	-0.43887	-0.182656	-0.224077	-0.140697	-0.526821	0.156061	0.0908454	0.0263251	-0.24344	0.1418
ACAD10	0.30135	0.273657	0.162723	0.0142669	0.0364813	0.0931378	0.305494	0.408851	0.165264	0.161101	0.113181
JMJD6	-0.245434	-0.393372	-0.485791	-0.525647	-0.572971	-1.18622	0.0622232	0.0310894	0.133815	0.167392	0.319551
MAST2	0.256229	0.360252	0.514017	0.479767	0.511059	0.73391	0.325568	0.419044	0.449337	0.457938	0.368762
SLC27A4	0.168412	0.560364	0.470711	0.421835	0.297115	0.665198	-0.27895	-0.0406048	-0.0741414	-0.24888	-0.0381998
PRMT9	0.0271229	0.0591932	0.0347453	0.0195742	-0.0713454	-0.0797208	0.0028591	0.0398934	0.00678543	0.0310062	-0.0832052
SFXN4	0.0272096	0.257292	0.161336	0.220469	0.14337	0.758187	0.0582572	0.0904174	-0.0351652	0.0296012	0.173349
ALKBH5	-0.349629	-0.54257	-0.334821	-0.263159	-0.396477	-0.540891	0.22585	0.179755	0.13032	0.286676	0.164598
EMB	0.23324	0.297397	0.524152	0.536005	0.524691	-0.402854	1.02399	1.15104	1.11858	0.937476	1.05901
AAGAB	-0.0335299	0.0492333	-0.00407816	-0.0306411	0.0152868	-0.167069	0.0886005	-0.119644	-0.0949391	-0.141429	-0.171342
CCDC174	-0.034706	-0.624581	-0.330257	-0.140563	0.0832398	-0.272128	0.0515996	0.0745708	0.0460763	0.566676	0.308335
ATAD2	-1.05776	-1.91327	-1.63121	-1.91251	-1.8855	-2.68403	-0.105607	-0.655962	-0.464404	-0.459117	0.0605204
FAM111B	-1.33125	-2.45071	-1.70759	-1.67899	-2.03835	-3.86741	NA	NA	NA	NA	NA
AFTPH	-0.0764545	-0.0223868	0.030243	0.089698	0.289122	0.152101	0.476338	0.237757	0.399204	0.355833	0.361824
CRTC1	-0.125097	0.497577	0.293782	0.306174	0.418177	0.788123	-0.577707	-1.30867	-1.60042	-1.23499	-1.43934
ZDHHC24	0.104209	0.0940169	0.533044	0.48715	0.205476	1.26078	0.180986	0.165473	-0.457642	-0.232092	1.20034
DNAJC14	-0.417605	-0.807602	-0.451756	-0.379017	-0.442113	-0.278561	NA	NA	NA	NA	NA
DEF8	0.0170035	0.269954	0.231107	0.295687	0.0328974	0.625324	0.173876	0.105583	0.0407723	0.0361523	-0.0653776
FRRS1	NA	NA	NA	NA	NA	NA	NA	NA	NA	NA	NA
ATG14	-0.208902	0.25986	-0.110579	-0.155758	0.0712924	-0.355162	-0.242539	0.102149	-0.620163	-0.211148	-0.364724
LHFPL2	-0.26512	0.50039	0.588817	0.371371	0.20411	1.15129	0.0908346	0.0464832	-0.116706	-0.229997	-0.0644619
NUDT18	0.800936	0.795722	1.0272	1.04652	0.999226	1.95888	0.0547645	0.428643	0.506646	0.585703	0.579085
STXBP4	-0.130301	-0.295254	-0.335101	-0.204117	-0.152633	-0.938796	0.179902	0.0991481	0.0971829	-0.0503071	-0.0602622
USP34	-0.0227447	-0.17541	-0.11554	-0.193923	-0.185116	-0.498483	0.061597	0.104943	0.0518847	0.00501151	0.170418
USP30	0.196423	0.208669	0.172628	0.107184	0.154155	0.461533	0.133093	0.21343	0.158668	0.0592237	0.158559
USP31	-0.00903154	-0.328034	0.22208	0.795213	0.615386	0.487163	0.165145	0.215228	0.107778	-0.171689	-0.0385393
TUBA1A	0.183892	0.13504	0.168186	0.291134	0.350884	0.687648	0.105368	0.0527544	0.257332	0.353137	0.334452
MARK2	0.107694	0.0246004	0.122598	0.155387	0.104792	0.346088	0.172102	0.124169	0.124975	0.0949082	0.0910836
PHF5A	-0.333933	-0.511181	-0.568364	-0.757487	-0.66972	-1.3582	-0.264854	-0.328747	-0.170048	0.0175653	-0.0852951
GPRIN1	-0.171473	-0.375458	-0.422206	-0.308351	-0.332504	-0.491384	0.427086	0.328804	0.421914	0.459769	0.283467
EFL1	0.0117873	0.0357194	0.0699667	0.0730383	0.257982	0.3959	-0.0346792	-0.0567257	-0.111383	-0.18344	-0.119772
MON2	-0.0431394	0.0468116	0.0302105	-0.0468924	-0.0624789	-0.117498	-0.136022	-0.119964	-0.137136	-0.1335	-0.077777
MYH14	0.0493943	0.277372	0.153427	0.263717	0.450053	0.727855	-0.271655	-0.156935	-0.205577	-0.0768442	-0.0533198
COMMD6	0.0955364	0.295561	0.199073	0.25063	0.238111	0.566016	-0.0339056	0.124519	0.0789041	-0.0185275	0.0546548
IRF2BP2	-0.177355	-0.726292	-0.646999	-0.61365	-0.789653	-1.26189	0.121562	-0.00971899	0.155821	0.25537	0.300077
C5orf24	-0.429931	-0.69101	-0.75641	-0.891631	-0.801031	-1.63171	0.00886433	-0.246127	-0.19824	0.0457796	0.0257811
FRMD5	0.251544	0.065295	0.372043	0.0836326	-0.450194	-0.494141	-0.0014471	-0.169076	-0.11209	-0.0825552	-0.0517808
PTAR1	-0.127766	-0.190435	-0.271398	0.0201616	0.0655272	-0.00598827	0.0342251	-0.093234	0.0494406	-0.104561	-0.06384
FILIP1	-0.295609	0.611693	0.287028	0.726111	0.381499	0.302516	0.212354	0.110471	1.41853	0.588283	1.86661
MRPL55	-0.0733022	-0.315343	-0.11706	-0.0841803	-0.178138	-0.0765613	0.26571	0.261696	0.216599	0.0518157	0.177369
METTL3	-0.218544	-0.492644	-0.410885	-0.436137	-0.310981	-1.14462	0.248935	0.0771157	0.124695	0.330216	0.273629
KBTBD6	0.0367848	-0.0351776	-0.171191	0.0564024	-0.221893	-0.0890692	0.0215843	-0.079253	0.0414036	0.230224	0.0595175
SERINC5	0.194598	0.457943	0.398795	0.178031	-0.0878181	0.151935	-0.101767	-0.554313	-0.580549	-1.04067	-0.654989
GLCCI1	0.215478	0.684442	0.593792	0.609227	0.523264	1.22759	0.190791	0.407412	0.104263	-0.165376	0.334664
LONP2	0.13339	0.107611	0.209502	0.0685475	0.0857172	0.252726	-0.0616309	-0.0611966	-0.0175037	0.0197663	0.0484359
ANKLE2	-0.036765	0.00547907	-0.0523261	-0.0151132	-0.00896387	0.162874	0.0574191	0.0015324	-0.0752109	-0.0392022	0.00849996
CAMK1D	0.314449	0.234695	0.235239	0.371972	0.769396	1.28489	0.113701	0.420135	0.232099	0.0150492	0.0271799
SPATA2L	0.676931	0.830359	0.613072	0.719135	1.0516	1.25873	0.603531	0.41086	0.491187	0.400364	0.683127
SLC9A9	0.104167	0.464014	-0.0263582	0.0961387	0.0976646	0.428658	-0.326168	-0.0461049	-0.0626564	0.108014	-0.0374786
PLEKHH2	NA	NA	NA	-1.25011	-0.291233	-2.86884	0.178032	0.192074	0.0634722	NA	NA
SLC41A1	0.199175	0.534779	0.054009	0.357087	0.209908	1.04554	NA	NA	NA	NA	NA
NAXD	0.405147	0.646025	0.633354	0.807588	0.733302	1.7941	0.00653989	0.161887	-0.0499147	-0.0742983	-0.143928
TEX2	0.210696	0.416249	0.453831	0.534255	0.377381	0.677608	-0.0133767	0.224958	0.122619	0.0835952	0.0554227
GCC2	0.137896	0.201785	0.203355	0.247202	0.154376	0.0645078	0.138243	0.0957743	0.091412	0.0882654	0.0971438
ADGRA3	-0.187162	-0.25328	-0.454004	-0.560618	-0.523698	-0.582766	-0.0622615	0.133548	-0.133319	-0.393376	-0.3878
BBS7	0.19485	0.144004	-0.0794868	0.245348	0.0948459	0.498096	0.0350999	-0.267375	-0.258219	-0.163603	-0.188069
RHOT1	0.0522729	0.131147	0.163602	0.271219	0.213142	0.723738	-0.224222	-0.0848845	-0.128743	-0.261666	-0.170728
SMC5	-0.603694	-0.865747	-0.839833	-0.920289	-1.04076	-1.63198	-0.235602	-0.308308	-0.334095	-0.135516	-0.204903
AMN1	-0.19718	0.236682	0.302963	0.591575	0.298034	0.92942	NA	NA	NA	NA	NA
FTSJ3	-0.149032	-0.380508	-0.443814	-0.437529	-0.497393	-0.899417	0.08049	-0.051977	-0.0278917	-0.0487836	-0.0576596
SLC38A6	0.205926	0.540276	0.3462	-0.108968	-0.23097	-0.142892	NA	NA	NA	NA	NA
ABI1	0.279743	0.360906	0.275881	0.237292	0.148966	0.0710287	-0.0781067	-0.0786129	0.04128	0.0722881	0.101156
WDFY3	0.0679241	0.0900465	0.255946	0.305656	0.289169	0.526899	0.142956	0.230206	0.225554	0.197731	0.147494
KIRREL3	-0.124854	-0.108329	-0.633609	-0.927418	-0.916413	-0.834653	-0.605084	0.0424059	-0.284786	-0.594226	0.369613
RBFA	-0.216301	-0.280557	-0.0879541	-0.150805	-0.261758	-0.00891247	-0.137665	-0.21587	-0.31004	-0.324473	-0.224658
SPICE1	0.399412	0.334979	0.508144	0.435902	0.0656388	0.0810292	0.647502	0.156654	0.673051	0.907535	1.03415
ADSSL1	0.584852	0.741556	0.896726	1.22867	1.08802	2.26542	NA	NA	NA	NA	NA
REXO1	-0.0536323	-0.365007	-0.509508	-0.132342	-0.309456	-1.18032	0.0104576	-0.422561	-0.304283	0.0921179	-0.0835686
SLC39A11	0.439964	0.567128	0.595335	0.777902	0.902901	1.57594	0.406916	0.572673	0.659116	0.768569	0.683944
ARHGAP24	-0.024945	0.209597	0.182754	0.149044	-0.173094	0.486605	-0.184328	-0.098733	-0.313802	-0.278683	-0.0511721
ARMC10	-0.327871	0.121266	0.136768	0.154137	-0.270121	0.368329	NA	NA	NA	NA	NA
KDM8	-0.420128	-0.72966	-0.391562	-0.692085	-1.16787	-1.32071	NA	NA	NA	NA	NA
TCAIM	0.150012	0.237091	0.0398355	0.323833	0.19055	0.738486	NA	NA	NA	NA	NA
RYBP	-0.246912	-0.577727	-0.52954	-0.595646	-0.494771	-0.692625	-0.0958547	-0.290055	-0.178671	-0.215722	-0.229584
DCLK2	0.0234892	-0.0554919	0.0418738	0.239715	0.158354	0.134975	0.317674	0.133977	0.0408368	0.0797318	0.164194
ARRDC1	0.32756	0.123554	0.179078	0.185389	0.404859	0.481426	0.628922	0.518557	0.542748	0.0997944	0.324812
TTC9C	0.134379	0.0455148	0.0303301	0.0646671	0.0187933	-0.0296708	-0.25308	-0.111829	-0.152396	-0.257457	-0.33161
LRRC17	0.503568	0.0430156	0.132134	0.0482906	0.316655	0.98988	0.486066	0.902563	0.81169	1.12592	0.887846
CCNYL1	0.363694	0.548132	0.59056	0.626226	0.725232	0.905181	-0.301726	-0.249052	-0.230969	-0.071013	-0.217025
ABTB2	0.480615	1.11802	0.627525	0.894354	0.962604	1.86974	-0.209366	-0.245852	-0.420907	-0.226127	0.127016
C12orf29	0.102071	-0.057791	0.0340057	0.00172855	-0.11067	-0.277271	0.311299	0.193186	0.123666	0.0672694	0.0276166
GDPD1	0.677389	1.28525	0.958091	1.25289	1.2485	1.84594	-0.219691	-0.109816	0.029216	0.182	0.277481
C19orf47	-0.203898	-0.635915	-0.578597	-0.819743	-0.863394	-1.04994	-0.130562	-0.319186	-0.240521	-0.378346	-0.300422
PDDC1	0.414382	0.612502	0.673306	0.68562	0.570185	1.00351	0.157383	0.246272	0.163138	0.0587298	0.0271239
SLC43A3	-0.811941	-0.965641	-0.970393	-1.42572	-1.83911	-2.60319	0.991916	0.350541	-0.20246	-0.64031	-1.87538
COLGALT1	0.176093	0.333908	0.374832	0.507801	0.357939	0.507121	0.0242667	0.0442171	-0.0737863	0.0524555	-0.0399753
POGLUT1	-0.198943	-0.0318678	-0.000572019	0.0659848	0.157736	0.520655	-0.18315	-0.152721	-0.149867	-0.119776	-0.0948287
FAM98A	0.00731552	0.00417053	0.0801175	0.0573096	0.028492	0.30819	-0.0916731	-0.0788407	-0.10778	-0.224062	-0.166563
RCBTB1	0.0419962	-0.870984	-0.0110118	0.0363203	-0.21065	0.470524	0.0625771	0.135017	0.102795	NA	NA
GSTCD	-0.347976	-0.591396	-0.435395	-0.586343	-0.506635	-1.12017	0.0252367	-0.174723	-0.0858073	0.162178	0.14047
PDZD8	-0.0297589	0.146362	-0.0156899	0.0476765	0.0489774	0.168123	0.0114139	0.051685	0.114378	0.171876	0.235718
KMT2C	0.044337	0.00430075	0.140367	-0.0796048	-0.191201	-0.207515	0.0777149	0.113365	0.105494	0.0248558	0.0359732
USP32	-0.0579158	-0.0941842	-0.278924	-0.136363	-0.235818	-0.292306	-0.0584979	-0.138796	-0.218703	-0.178931	-0.142229
BBS1	-0.297033	-0.0391597	0.254544	0.134376	0.260587	0.878631	NA	NA	NA	NA	NA
ABHD11	0.0319911	0.0555958	0.107646	0.154801	-0.0379587	0.397215	-0.0187232	-0.0650717	-0.152982	-0.129395	-0.0964049
NLGN2	-0.265754	-0.539908	-0.165108	-0.360097	-0.341535	-0.420878	0.964687	0.918047	0.287465	0.337576	0.514711
NCOA7	0.220385	0.478646	0.467101	0.63527	0.626166	1.57068	0.303568	0.177014	0.263097	0.180896	0.289921
PPTC7	0.0225608	0.0947416	0.0201755	-0.0778586	0.127831	-0.0351707	0.0794786	0.157915	-0.10341	-0.345921	-0.256453
SLC30A5	0.257824	0.331959	0.152943	0.345813	0.267163	0.168124	-0.317457	-0.0777055	-0.368526	-0.471665	-0.491399
WDR48	-0.0191742	-0.199982	-0.0540531	-0.0502055	-0.0781732	0.296069	0.0966891	0.000672537	0.0445718	0.088517	-0.0137475
DNAJB14	-0.253799	-0.363931	-0.320333	-0.341568	-0.28125	-0.267959	0.102756	-0.0689608	0.0751468	0.00281467	-0.0101496
PIP4K2C	0.601109	0.816393	0.782719	0.634574	0.260368	0.743011	0.103768	0.234985	0.290807	0.0573513	0.15805
SPPL2A	0.0442318	0.24424	0.193407	0.0824314	-0.0262709	0.950257	-0.665699	-0.158876	-0.215737	-0.301738	-0.54521
SFXN5	-0.291355	-0.524893	-0.289491	0.0834001	-0.0626437	-0.0730293	NA	NA	NA	NA	NA
TRPM4	0.117632	0.354556	0.399764	0.382929	0.738373	0.939568	0.186437	0.521593	0.383579	0.279824	0.40981
HELQ	-0.110859	-0.0205476	0.0341813	-0.00316834	-0.0578972	0.20939	-0.169629	-0.256475	NA	NA	NA
BRIX1	-0.185348	-0.463979	-0.344521	-0.358775	-0.408989	-0.594121	0.254526	0.167338	0.189866	0.178827	0.260573
NSUN6	-0.0473105	-0.368787	-0.292285	-0.354169	-0.498821	-0.891956	-0.164793	-0.333508	-0.126355	0.0251287	0.0529933
SLC37A2	-0.291193	-0.337548	-0.0039907	-0.0848706	-0.758467	-0.278325	0.053238	0.0460067	-0.00235453	-1.00455	-0.241633
IPO4	-0.0892209	-0.26024	-0.240818	-0.356663	-0.31111	-0.466211	0.0688256	0.0403723	0.0724249	-0.0206143	-0.0169353
SETD7	0.28005	0.432021	0.343285	0.34573	0.448131	0.51962	-0.131166	-0.0646165	-0.0818821	-0.0927841	-0.0694178
FRS2	0.899475	0.64716	0.397728	0.408168	0.732094	0.560083	NA	NA	NA	NA	NA
ZC3H15	-0.10741	-0.263443	-0.362627	-0.233263	-0.227043	-0.534033	0.300191	0.21947	0.233554	0.254863	0.3472
PHF10	-0.350346	-0.905171	-0.73906	-0.787807	-0.793306	-1.13971	0.00908597	-0.0853532	0.117405	0.301822	0.157223
RAB2B	0.0341608	0.236851	0.296876	0.24144	0.173857	0.364525	-0.0947798	-0.0798995	-0.175116	-0.201273	-0.186573
THEM6	0.119657	0.264953	0.288932	0.210314	0.341612	0.966848	0.138671	0.256477	0.293546	0.262842	0.113802
DCAF4	-0.416311	-0.134821	-0.390365	-0.533659	-0.635851	-0.787129	0.00175008	0.00362307	0.0366431	-0.0466912	0.120712
SNX33	0.210018	0.161416	0.267318	0.317543	0.312446	0.556669	0.235563	0.384322	0.24312	0.274256	0.136544
RTN4IP1	0.100834	0.155515	-0.258193	-0.224795	-0.244977	-0.0361426	-1.13172	0.0355693	0.00137386	-0.148814	-0.110107
GATAD2B	-0.176366	-0.533478	-0.477215	-0.504071	-0.249279	-0.832962	-0.0384987	-0.0616266	0.211857	0.391595	0.281849
RIN2	0.112322	-0.0290064	0.3064	0.482671	0.475598	0.677992	0.279389	0.255331	0.389238	0.126192	0.352316
H1FX	-0.988063	-1.56483	-1.42379	-1.73132	-1.70364	-2.6311	-0.267797	-0.544461	-0.488117	0.0623139	-0.0638474
DHX38	-0.222541	-0.458279	-0.519101	-0.530212	-0.421666	-1.09773	0.0512739	-0.157132	-0.122474	0.008283	0.0552536
AKAP1	-0.0372969	-0.0735779	-0.16389	-0.170625	-0.230157	0.105305	0.507564	0.323206	0.204696	0.0733781	0.0819162
HTRA1	0.132117	0.47134	0.499039	0.513833	0.204166	0.860066	0.568552	0.736656	0.554993	0.053108	0.330042
P3H4	0.43478	0.565664	0.63022	0.746901	0.915042	0.869219	-0.12286	-0.0201489	-0.0438712	0.220909	0.130493
KAT2B	-0.591072	-0.39337	-0.632672	-0.159342	-0.370148	-0.413476	-0.112002	-0.00438818	-0.437117	-0.576063	-0.69154
BCL2L2	-0.361148	-0.484014	-0.425159	-0.510273	-0.536256	-0.942929	0.0369085	-0.163261	-0.114198	0.00790768	-0.138115
KIFAP3	0.336614	0.438704	0.429305	0.427753	0.413758	0.778017	-0.172986	-0.198044	-0.148293	-0.160296	-0.0735702
SMARCC1	-0.50515	-1.14383	-0.832709	-1.12771	-1.16219	-2.27531	0.0662092	-0.0596784	0.142794	0.238593	0.121634
USP7	-0.228633	-0.438669	-0.31284	-0.466737	-0.490957	-0.461604	-0.154143	-0.180385	-0.153912	-0.158495	-0.155437
NAT6	0.133111	0.381924	0.143174	0.251521	0.27037	0.397057	-0.0266677	0.0902699	0.13413	-0.0460603	-0.0352244
LPP	0.323771	0.437401	0.413768	0.586957	1.05683	0.707028	-0.131206	-0.15233	-0.179834	-0.0688495	-0.0952527
MT1L	0.188461	0.117407	0.18072	-0.241653	0.332984	-0.72016	0.561231	-0.0721578	0.0808775	0.208095	0.639165
ATP2A3	0.0471984	0.117467	0.090693	0.174884	0.314305	0.689936	-0.469907	-0.228262	-0.24019	-0.27133	-0.403401
TCEAL3	1.16059	1.62263	0.934614	1.55043	1.38065	1.02192	-0.0536932	0.162365	0.342433	0.825267	0.291048
PRKCDBP	0.123637	0.375498	0.33399	0.548613	0.751591	1.03064	-0.0507873	-0.137066	-0.0683894	-0.0526586	-0.145181
TOMM40L	0.280495	0.377823	0.39904	0.48607	0.471291	1.24048	0.0831932	0.241258	0.332415	0.253678	0.250177
YIPF5	0.11957	0.404443	0.210764	0.285291	0.0813047	0.21996	0.0498443	0.143144	-0.0188708	0.0370678	0.303794
ERGIC1	0.421395	0.623005	0.621737	0.741308	0.799879	1.3566	-0.0355503	0.168809	0.0818641	-0.0282309	0.0502742
RELT	NA	NA	NA	-1.27505	-1.65457	-1.00384	0.841677	0.736917	0.339282	NA	NA
MRPL24	-0.0809421	-0.122977	-0.0979362	-0.0734223	-0.151108	-0.229315	0.12705	0.147316	0.0334675	-0.0625207	-0.102467
NTAN1	0.0983571	0.113439	0.227626	0.174513	0.179584	0.750085	-0.123371	-0.0317759	-0.0435829	-0.196181	-0.0741385
RAB7B	NA	NA	NA	-0.192202	0.199466	0.108347	0.606342	-0.282587	-0.237461	NA	NA
VTI1A	0.0378563	0.176387	0.0874529	0.23931	0.0934813	0.449451	0.30072	0.357111	0.275225	0.273779	0.32452
TMEM143	NA	NA	NA	NA	NA	NA	NA	NA	NA	NA	NA
VOPP1	-0.274431	-0.0168586	0.010549	-0.595658	-0.835879	-0.637965	-0.158516	-0.215818	-0.299226	-0.669481	-0.457536
TOMM6	-0.40807	-0.475657	-0.522332	-0.306509	-0.245099	-0.364774	-0.458436	-0.276587	-0.0920107	-0.33561	-0.357648
TMEM186	NA	NA	NA	0.494632	0.0740581	1.16136	-0.51984	-0.153208	-0.473668	NA	NA
TBC1D20	0.196285	0.243407	0.230599	0.186275	0.0549854	0.239282	0.0306915	0.12295	0.0879913	0.00919363	0.0492056
MIEF2	0.486575	0.958658	0.711837	1.06984	1.04861	1.45012	-0.419001	-0.266793	-0.210088	-0.298693	-0.41748
NSUN4	-0.0425889	-0.0384409	-0.0393712	-0.19446	-0.217307	-0.340886	0.0304078	0.0212651	0.0128351	0.0364501	-0.120996
RHBDF1	0.138982	0.613185	0.674012	0.5948	0.622957	1.36939	0.144389	0.0130572	-0.221212	-0.531083	-0.306357
RPUSD4	-0.303074	-0.442053	-0.260466	-0.495605	-0.529728	-0.873619	0.1227	0.19025	0.519133	0.438425	0.476067
FAF2	0.191054	0.266982	0.137128	0.218271	0.24248	0.445827	-0.0684977	-0.111781	-0.166252	-0.0291561	-0.090719
ANAPC16	-0.31781	0.0515489	-0.0421048	0.183109	-0.149981	-0.0337207	0.719448	0.114738	-1.54627	-1.50797	-1.48102
RSPRY1	0.119811	-0.0331164	0.0723962	0.0394132	-0.0216108	0.0467983	0.00358854	0.046127	-0.0430896	-0.0250608	-0.145012
MTERF3	-0.397146	-0.591536	-0.50173	-0.509311	-0.64015	-0.882748	0.0432906	-0.0558804	0.0253096	-0.180712	-0.122819
SPDL1	-0.245691	-0.540149	-0.511647	-0.377134	-0.876866	-1.15529	0.0886075	-0.212333	-0.0862556	-0.038799	-0.00189769
KTI12	0.241892	-0.232459	-0.06039	-0.208928	-0.248087	-0.362134	0.0956196	-0.0955916	0.0127506	0.0459355	0.370683
MRPS24	0.0161701	-0.158856	-0.107477	-0.109624	-0.198322	-0.201622	0.0797197	0.0493599	0.0387926	0.139567	0.140128
MRPL53	-0.120229	-0.286892	-0.214999	-0.23383	-0.25158	-0.221633	0.19295	0.16841	-0.0115072	0.00108875	0.0220917
CHFR	-0.751508	-0.135819	-0.211764	-0.00871756	-0.70825	-1.1914	NA	NA	NA	NA	NA
PTCD3	-0.100145	-0.116113	-0.0632609	-0.0945965	-0.139892	-0.15092	0.217611	0.141773	0.116448	0.127404	0.167699
MCRS1	-0.632804	-0.790395	-0.827494	-0.972469	-0.898848	-1.66203	-0.157901	-0.383777	-0.25133	-0.038647	-0.0430687
STAMBPL1	-0.128487	-0.281287	-0.233464	-0.147308	0.243851	-0.281333	0.238373	0.276703	0.421658	0.781666	0.777648
CERS2	0.110821	0.0824871	0.160418	-0.0174266	-0.0280831	0.292983	0.190115	0.202139	0.153401	0.183899	0.336057
CFAP36	0.087738	0.0991864	0.103186	0.38342	0.181302	0.459665	0.560248	0.577152	0.403232	0.553882	0.373824
SDSL	0.74446	0.930263	1.14577	1.22747	0.792297	1.95045	0.0583663	0.387028	0.314088	0.236939	0.154807
MRPL48	0.0554981	-0.0773006	-0.0848317	-0.234529	-0.260749	-0.0585972	-0.268596	-0.168428	-0.307569	-0.221828	-0.259316
ZNF274	0.422171	0.263601	-0.0321401	-0.0129199	0.731801	0.600655	0.113692	-0.0221469	-0.706628	-1.40085	0.761564
GRAMD3	-0.072591	0.443129	0.520216	0.34888	0.280035	-0.105865	-1.00866	-0.581358	-0.256582	-0.313441	-0.371729
SENP5	-0.186008	-0.457017	-0.346188	-0.365393	-0.0796855	-0.787196	-0.0402155	-0.195007	NA	NA	NA
DDRGK1	-0.0705802	-0.000259282	0.0272043	-0.00922623	-0.0858013	0.161749	0.0286969	0.0862825	0.0246813	-0.0739457	0.0428857
PPP1R16A	0.350407	0.382844	0.56506	0.1097	0.759462	1.15757	NA	NA	NA	NA	NA
PAWR	0.251277	0.804411	0.538869	0.772805	0.939823	1.46743	-0.101493	-0.279879	-0.231014	-0.178382	-0.0970468
KIRREL	-0.0637802	-0.110619	-0.020462	-0.21059	-0.187276	-0.0827271	0.346533	0.470892	0.317406	-0.0822888	0.176999
WNK4	-0.0428777	-0.196535	-0.207048	-0.182275	-0.527562	-2.08015	-0.000508607	-0.698139	-0.344635	0.0112804	-0.0516366
COG3	-0.00365642	0.0233522	0.0183956	-0.0623723	-0.0508994	-0.0371482	-0.154183	-0.0353705	-0.0276875	-0.0162183	-0.0565708
ELMO2	0.175389	0.0953962	0.0651811	0.0977856	0.123218	0.173361	0.0960614	0.0936487	0.0654124	0.103356	0.041133
DCAF5	0.264967	0.241972	0.230839	0.300101	0.306187	0.265615	0.305911	0.295091	0.24508	0.312111	0.306809
LCOR	-0.202138	-0.619013	-0.426068	-0.517101	-0.423861	-0.994191	0.173876	-0.0682387	0.203089	0.457843	0.380505
FEM1C	-0.44682	-0.117931	-0.36588	-0.309914	-0.272097	-0.704841	0.295638	0.180939	-0.00621399	-0.0716198	0.296514
C8orf76	-0.29355	-0.0111882	-0.295264	-0.441923	-0.195771	-0.294243	0.6192	0.301184	0.133561	0.163358	0.287353
CLPTM1L	0.272717	0.470428	0.47139	0.567574	0.510636	1.37728	0.0632568	0.230182	0.0562186	0.101761	0.00947109
PPP1R13B	0.299666	0.328867	0.284663	0.149638	0.539737	0.648014	0.111994	0.10589	0.382439	0.0799176	0.280295
NSD1	0.247458	0.0492707	0.0107423	-0.268774	0.186906	-0.139379	-0.149255	-0.123515	0.0179708	0.44568	0.437163
TMEM68	0.39082	0.681394	0.768619	0.464467	0.504595	1.21465	-0.302816	-0.233325	-0.31361	-0.378536	-0.134477
CEP63	0.0214887	-0.541091	-0.113365	-0.116526	-0.191738	-0.207043	NA	NA	NA	NA	NA
CCDC43	0.199019	0.391024	0.353441	0.578655	0.571787	0.615704	0.46912	0.399386	0.591678	0.541004	0.578437
CLIC6	0.196128	-0.13442	0.153535	4.67639e-05	0.10688	0.229712	-0.0639254	0.0199931	-0.0296158	0.0904298	0.0969657
NSUN5	-0.49751	-0.576151	-0.612636	-0.635001	-0.555234	-0.892421	-0.27653	-0.298699	-0.061479	-0.0767801	0.0449209
ARHGEF17	0.310986	0.460598	0.395411	0.475307	0.480362	0.495299	-0.021437	0.0956391	0.0130494	0.196922	0.0700249
ALKBH3	-0.134786	-0.22704	-0.170149	-0.303769	-0.434143	-0.502438	0.113933	-0.0678459	-0.0307126	0.098306	-0.0125243
KIF20B	-0.724538	-0.999121	-0.866969	-0.966551	-1.17277	-1.35422	-0.137404	-0.322062	-0.0899536	-0.222914	0.294062
VPS35	0.114873	0.204423	0.258323	0.304053	0.123529	0.880148	0.00904374	0.181893	0.0895623	-0.0156836	0.0115302
XPO6	-0.103605	-0.172725	-0.224495	-0.244858	-0.247787	-0.464885	-0.136891	-0.175758	-0.0813214	-0.0427957	-0.0803399
BBS4	0.232632	0.746642	0.719415	0.433438	0.78993	0.871608	-0.0278172	-0.2222	0.0920655	-0.0442404	-0.252345
TGS1	-0.416567	-0.147549	-0.0471658	-0.389886	-0.497336	-0.886067	-0.117829	-0.0920191	0.171486	0.179862	0.229064
PCNX1	0.00607943	0.316912	0.259521	0.056861	-0.0704365	0.188342	0.165334	0.277662	0.212639	-0.019906	-0.00951108
PSMD1	-0.00906965	0.126786	0.0600044	0.0781074	0.0383288	0.127665	-0.0317176	-0.017852	-0.0984571	-0.100842	-0.111721
TSC22D3	0.754324	0.121323	0.0212357	-0.13429	-0.139668	-0.34089	0.465063	0.92728	-0.277501	0.301967	0.17455
TM9SF2	-0.126248	0.0172392	0.061002	-0.0686911	-0.125615	-0.0357573	-0.0353037	0.0972368	0.0194622	-0.211792	-0.179765
MYBBP1A	-0.289569	-0.406006	-0.442533	-0.539069	-0.596158	-0.963271	-0.0785534	-0.15005	-0.155363	-0.19016	-0.221909
EIF2AK1	0.180307	-0.0107492	0.167094	-0.102351	0.0682376	-0.0208924	0.141607	0.0702875	0.449766	0.412221	0.4269
SLC25A21	NA	NA	NA	0.474656	0.660933	1.09358	-0.0368934	0.100644	-0.309698	NA	NA
PIGQ	0.0194776	-0.100238	-0.0434005	0.14141	0.101044	0.30303	-0.0419685	0.241542	0.101566	0.031095	-0.00515575
CPPED1	0.357876	0.860144	0.956703	0.943456	0.86372	1.66254	-0.14489	0.014734	-0.114789	-0.0956496	-0.165813
ADPGK	0.0671904	0.113244	0.229688	0.303489	0.388068	0.773496	0.0949659	0.112383	0.120499	0.151791	0.0784144
CENPK	NA	NA	NA	NA	NA	NA	NA	NA	NA	NA	NA
TIMM29	0.83385	0.889263	0.457322	0.397583	0.287	0.657718	-0.442577	-0.204854	0.150572	-0.161584	-0.010679
MARVELD1	0.330347	0.18296	0.0980478	0.317968	0.357686	0.780823	0.0439333	0.234621	-0.24379	NA	NA
YIPF4	-0.199639	-0.176709	-0.140756	-0.244709	-0.230926	-0.420355	-0.134799	-0.0427838	-0.11532	-0.265155	-0.130359
TCHP	-0.270776	0.106023	-0.028893	-0.143692	-0.122972	-0.208515	0.289427	0.199369	0.312725	0.441438	0.64909
URM1	-0.197648	0.33087	0.0815352	0.0275805	-0.0335922	-0.305591	-0.479749	-0.292906	0.316299	0.406057	-0.340443
HGH1	-0.239332	-0.327269	-0.291174	-0.338501	-0.340647	-0.44802	0.0364023	0.10454	0.0571006	-0.0281967	0.0227733
SPON2	0.292527	0.403299	0.531919	0.934187	-0.604624	-1.07486	-0.437942	-1.00198	-1.53837	-1.41049	-1.38512
APOO	0.102809	0.139174	0.0670986	0.355106	0.219813	0.942592	-0.125851	0.000794026	-0.11601	-0.288857	-0.240037
C20orf24	0.39694	-0.278874	0.0840106	0.162577	0.0144063	0.586477	0.423035	-0.00138056	-0.0813351	-0.0140007	-0.0364677
MRI1	0.136451	0.308366	0.14939	0.236124	0.275412	0.30471	-0.105202	-0.165231	-0.175065	0.0907005	-0.139677
ADI1	0.163387	0.13949	0.178023	0.109169	0.261389	-0.0101563	-0.236103	-0.0731034	0.0174207	0.162256	-0.150769
MECR	-0.0499289	0.0445462	0.0477929	0.0596644	0.0771991	0.305404	0.125071	0.181253	-0.00728717	0.0379808	-0.000735587
TRIM62	0.245338	0.378767	0.289212	0.486476	0.467578	0.718135	NA	NA	NA	NA	NA
KIFC3	-0.232114	-0.497618	-0.484078	-0.649818	-0.637581	-0.88664	0.01518	-0.106034	-0.275139	-0.296104	-0.250199
KIAA0586	-0.679141	-0.832872	-0.873761	-0.746883	-1.05391	-1.61291	NA	NA	NA	NA	NA
SLC12A9	0.364928	0.495918	0.602498	0.687189	0.45637	1.88835	-0.0172987	0.237878	0.152623	-0.0943794	0.0713751
POLDIP3.1	-0.251411	-0.64772	-0.641657	-0.544532	-0.530424	-1.34561	0.0229881	-0.0508606	-0.0509171	0.18015	0.0568166
HELZ2	-0.351787	-0.404926	-0.189083	1.22768e-05	0.081731	-0.274155	-0.0578906	-0.052859	-0.553297	-0.322202	-0.378527
PPP1R12C.1	0.565544	1.2212	1.22074	1.47223	1.40541	2.11719	NA	NA	NA	NA	NA
TNKS1BP1	0.360128	0.492313	0.400061	0.634507	0.741513	0.623722	0.37348	0.431616	0.404856	0.514553	0.346414
TANC1	0.251331	0.304973	0.376064	0.454764	0.263457	0.643203	0.190165	0.316724	0.274039	0.213409	0.112753
XPO4	-0.165449	-0.341743	-0.229253	-0.272037	-0.251339	-0.279292	0.0242624	0.00495206	-0.0563217	-0.0833368	-0.0614525
COA1	-0.503354	0.312575	0.0699758	1.57477	-0.139531	0.269904	0.0789157	0.508836	NA	NA	NA
MKRN2	0.290162	0.285861	0.255521	0.31436	0.306418	0.12875	0.0383249	-0.0189437	-0.0176115	0.0686116	0.0164458
LHPP	0.171313	0.327175	0.49782	0.417737	0.460821	0.926504	-0.493982	-0.112405	-0.475463	-0.423711	-0.515784
COMMD4	0.0654226	0.0341736	0.0607429	0.122919	0.0459048	0.46089	0.207309	0.193038	0.0726162	-0.0293249	0.109287
INTS2	-0.244143	-0.444297	-0.340496	-0.40945	-0.468109	-0.967515	-0.0123933	-0.102639	-0.172961	0.0809114	-0.0513825
KLHL25	-0.0555213	-0.126948	-0.0919645	-0.0123087	0.0615639	0.324003	-0.0708635	-0.0192077	-0.128421	-0.23028	-0.0206748
DDX47	-0.236024	-0.655496	-0.599692	-0.684127	-0.700636	-1.08687	0.0988133	-0.100544	0.069928	0.0906386	0.126625
RAB1B	0.105687	0.247678	0.252442	0.132931	0.221788	0.383838	0.0170305	0.0544234	0.0386863	-0.0100108	-0.00616987
CYSTM1	-0.109682	0.305378	0.198607	0.0366561	-0.436259	0.332814	0.216944	0.496254	0.170319	-0.237485	-0.063669
MTIF3	-0.199086	0.00587008	-0.132793	-0.100398	-0.176166	0.179817	-0.19058	-0.0930194	-0.0554499	0.0742153	-0.0425084
RAB3GAP2	0.145689	0.271526	0.173796	0.230705	0.15863	0.211861	0.0178398	0.195227	0.170197	0.217676	0.165229
RANBP17	0.31967	0.483976	0.605953	0.494814	0.738943	0.607786	0.0261129	-0.0154925	-0.104948	-0.16162	-0.0668443
PARL	0.0719819	0.280107	0.514332	0.597087	0.193717	1.18914	-0.119315	-0.0297217	-0.0438372	-0.0500635	-0.555452
TMEM245	0.0822025	0.140298	0.0849433	0.35266	0.251539	0.699846	-0.131431	-0.115565	0.105601	-0.113189	0.00913833
C11orf68	0.0932359	-0.0562268	-0.0287822	0.0113914	-0.192702	0.0422942	0.171872	0.044159	0.0556546	0.0872481	0.175881
PTPN23	-0.014903	0.0803348	0.0494157	-0.00891124	-0.022863	0.201911	-0.0759064	0.0635717	0.00899198	-0.063429	-0.00276724
ZNF768	-0.921683	-1.19386	-1.17675	-1.5969	-1.56663	-2.23407	-0.141255	-0.518484	-0.297767	-0.201955	-0.0706622
CCDC86	-0.10587	-0.522315	-0.536506	-0.393325	-0.52239	-1.05406	0.646017	0.121265	0.235511	0.20027	0.258975
YTHDC2	-0.104168	-0.173694	-0.122506	-0.263707	-0.278187	-0.568765	0.102583	0.122097	-0.00998499	-0.0223954	-0.0605479
ELAC1	0.0213176	-0.00817834	-0.245703	-0.166362	-0.173912	-0.30538	NA	NA	NA	NA	NA
SYNC	0.526054	0.870066	0.637656	0.766318	0.554177	0.557993	-0.0919724	-0.0850701	-0.0814258	-0.171822	-0.171285
DOCK5	0.180064	0.203093	0.158104	0.0827238	-0.0171051	-0.0608137	-0.00605387	-0.0318292	-0.0489099	-0.0479798	0.0159906
PLEKHG2	0.00313612	-0.182154	-0.202379	-0.104542	-0.00410681	-0.224408	0.0860217	0.0832687	0.21502	0.445405	0.288036
ZNF703	-0.199023	-0.509313	-0.681574	-0.205195	-0.148427	-1.57415	0.49332	-0.224169	-0.0843727	-0.0201071	-0.490537
PHAX	-0.339613	-0.688892	-0.5021	-0.586106	-0.576815	-1.28651	0.111697	-0.141392	0.0376087	0.054105	0.148951
FAM188A	0.31493	0.30567	0.181669	0.223214	0.276392	0.453851	-0.430332	0.0148823	-0.263681	-0.426011	-0.346998
GORASP2	0.0223176	0.229452	0.0698613	0.101662	0.119226	0.30931	-0.0481321	-0.113981	-0.115206	-0.06795	-0.102223
PSTPIP2	0.261732	0.649956	0.734751	0.758287	0.593171	0.798873	-0.0359282	-0.0335026	0.167182	0.266066	0.1035
WDR54	-0.00720085	0.00183169	0.0847354	0.00607242	-0.00915782	0.592956	-0.105366	-0.0362209	-0.0294883	-0.241225	-0.203644
2021-03-07	-0.28598	-0.30166	-0.394913	-0.491357	-0.49236	-0.638904	0.135906	-0.00940776	0.0507553	-0.275602	-0.0516855
VPS37B	0.199763	0.20143	0.262958	0.250037	0.14298	0.447182	0.0116406	0.155875	0.0539384	-0.169457	-0.106263
JMJD4	0.21571	-0.0273765	0.682067	0.218513	0.208937	0.592933	0.00891095	0.762735	0.501003	0.64724	0.545912
UBTD1	-0.00297544	0.0936853	0.134688	-0.00214309	-0.130541	-0.109562	0.177305	0.335376	0.315484	-0.0711677	-0.138064
BCL2L12	-0.207895	-0.278877	-0.239363	-0.438939	-0.501204	-1.0704	0.0757988	-0.102975	-0.0558425	0.123449	-0.0705091
PLEKHA1	0.302997	0.683742	0.604434	0.61226	0.69423	1.52898	0.482858	0.596277	0.644737	0.295799	0.531386
SCPEP1	0.22079	0.383851	0.395189	0.756077	0.44264	1.43572	0.231607	0.548838	0.435152	0.0177292	-0.110952
RDH14	0.583208	0.235622	0.150411	0.592163	0.582376	1.2422	-0.0122005	0.0562434	-0.167349	-0.343585	-0.0807158
SPC25	-0.636185	-1.46506	-1.15177	-1.35222	-1.51209	-3.09488	0.0287056	-0.239167	-0.175864	-0.0315456	-0.0472005
CBX8	-0.272812	-0.689676	-0.505061	-0.481271	-0.343864	-0.948725	0.400169	0.394058	0.510038	0.656659	0.535225
ARHGEF10L	0.321849	0.542103	0.750128	0.868177	0.685616	1.1415	-0.12086	-0.0220733	-0.0768045	0.148349	0.241225
PCDH18	-0.0671921	-0.303244	-0.248924	-0.602595	-0.663055	-1.04655	0.327252	0.583113	0.23555	-0.0562554	-0.0610761
PREB	0.177253	0.240956	0.276058	0.317507	0.299725	0.84227	-0.00781935	0.0957668	0.0271154	-0.0258062	-0.00815101
POLD4	0.0284624	-0.202104	-0.243181	0.111021	-0.0820497	-0.589911	NA	NA	NA	NA	NA
TUFT1	0.66015	0.781597	0.676987	0.714793	1.05466	0.87064	0.308516	0.440178	0.666576	0.566498	0.393939
ATP13A2	0.214465	0.546072	0.648752	0.968153	0.930288	1.79027	-0.347692	0.278202	-0.45049	-0.935622	-0.755673
EXOSC3	-0.38526	-0.729808	-0.504843	-0.627236	-0.746616	-1.34417	0.0861165	-0.0735808	-0.0363736	0.00464489	-0.0258384
XPNPEP1	0.159869	0.494236	0.321445	0.494591	0.471197	0.784537	-0.0195675	0.0463236	-0.0350752	0.0603851	-0.0666984
DDX21	-0.458453	-0.902523	-0.783939	-0.954372	-0.998499	-1.80779	0.00225575	-0.304464	-0.0103728	0.130934	0.125193
SAR1A	0.0694104	0.0796171	0.132172	0.266037	0.209742	0.336893	0.0107081	0.108057	0.0616191	0.112608	0.00323557
NANS	0.236812	0.288418	0.398333	0.372249	0.649403	0.74639	-0.112961	-0.0815127	-0.0664141	0.0458014	0.105369
AAAS	-0.479423	-0.794974	-0.67375	-0.683057	-0.778665	-0.876633	-0.0386019	-0.24357	-0.0536642	0.11908	0.120969
SNRK	0.287721	-0.0419456	0.0881749	-0.1963	-0.0265643	0.297859	1.00931	0.479974	-0.00981393	0.240857	0.203408
ZNF277	0.249407	0.0686891	-0.000857375	0.0157682	0.0303285	-0.357386	0.0748502	-0.0913972	-0.109098	-0.224032	-0.0611181
VPS45	0.070132	0.0515212	0.176215	0.143883	0.162987	0.449479	0.0397644	0.148101	0.0549432	-0.0415598	0.0200969
MDN1	-0.404954	-0.742387	-0.707084	-0.759919	-0.941356	-1.19763	0.0971478	-0.0746532	0.056223	0.0143235	0.0191739
LYRM2	-0.268843	-0.454223	-0.452799	-0.668419	-0.666801	-0.762879	-0.254892	-0.345923	-0.476625	-0.780885	-0.787045
STAU2	0.0890121	0.0834641	0.0825573	0.00824995	0.129777	-0.120229	0.0996524	0.0787796	0.254617	0.279152	0.222783
ABCB8	0.103717	0.103086	0.189797	0.219284	0.356804	0.715662	0.205166	0.316613	0.236754	0.363402	0.173615
PANK4	0.0826505	0.184141	0.189649	0.229405	0.312335	0.654617	-0.163319	-0.132055	-0.101322	0.0549258	0.00863626
INTS7	-0.241845	-0.365536	-0.354787	-0.478257	-0.504389	-0.978786	-0.0158858	-0.131117	0.0502465	0.0296706	0.137931
DDX18	-0.430878	-0.833237	-0.662545	-0.784484	-0.792968	-1.2872	0.14892	-0.113663	-0.011952	0.0635471	0.0951938
FAIM	-0.253658	-0.598803	-0.444018	-0.932227	-0.989109	-1.13985	-0.413023	-0.35532	NA	NA	NA
TMEM38B	-0.317948	0.134932	-0.0705402	-0.504041	-0.906534	0.323735	0.203857	0.365896	0.276938	-0.252356	0.150178
NECAP2	0.185721	0.40547	0.320744	0.485044	0.394716	0.711222	-0.0643469	0.106869	0.0558183	0.0347982	0.0584185
FAM120C	-0.18796	-0.263675	-0.237355	-0.397573	-0.272471	-0.247293	-0.130867	-0.00656076	-0.00850291	0.128227	0.0616824
LYAR	-0.155059	-0.379034	-0.259936	-0.425435	-0.47796	-0.81387	0.0499956	-0.134727	-0.160185	-0.0656719	0.0865288
DUS2	-0.371419	-0.562969	-0.428453	-0.594245	-0.426738	-1.23041	-0.00275574	-0.154882	-0.117618	-0.184629	-0.11219
GDAP2	0.150905	-0.0771831	0.197635	0.284883	0.0949886	1.59521	0.62736	0.759483	0.521	0.145448	0.390812
ARL15	0.386038	0.324103	0.548581	0.659741	0.705774	1.05288	0.0378237	0.183044	0.274057	0.452175	0.197057
NSMCE4A	-0.434378	-0.827238	-0.715336	-0.832867	-0.783191	-1.33645	-0.00196383	-0.278588	-0.103275	0.0153848	-0.0284831
FAM53C	0.300236	0.371343	0.301377	0.292119	0.539362	0.209193	0.0235258	-0.509077	0.334789	0.277711	0.684927
GTSE1	-0.698778	-0.718205	-0.473143	-0.503647	-0.544904	-0.895829	NA	NA	NA	NA	NA
MRPL35	-0.182962	-0.423166	-0.291087	-0.57329	-0.826084	-1.03732	-0.0691778	-0.238566	-0.119106	-0.0497391	-0.221999
ITSN2	0.320169	0.390957	0.312542	0.364617	0.475013	0.581814	0.307719	0.484306	0.54992	0.395968	0.729101
CRIM1	-0.0381219	-0.132816	-0.13197	-0.575612	-0.332516	-0.281442	0.305353	0.270766	0.183137	-0.371259	0.0350406
VAPA	-0.095506	0.281383	0.137023	0.190043	0.166903	0.16542	-0.628857	-0.543455	-0.379776	-0.341658	-0.400844
HMG20B	-0.311304	-0.773037	-0.544746	-0.529703	-0.417555	-1.08989	-0.0649384	-0.254445	0.0228978	0.402933	-0.186429
BTBD7	NA	NA	NA	0.204537	0.220686	0.46699	0.198245	0.233576	0.517253	NA	NA
KIAA1522	0.246533	0.206702	0.197703	0.0404116	-0.0597631	-0.379019	0.306274	0.183484	0.153538	-0.066956	-0.0710133
COPZ2	0.417354	0.908024	0.94578	1.20782	1.10472	1.57693	0.0156064	0.0318924	-0.252652	-0.261063	-0.317437
HEATR5B	-0.0485399	-0.0154826	0.0321059	-0.0274722	0.102859	-0.0511696	-0.197647	-0.295118	-0.208107	-0.250346	-0.179957
CHPF2	0.317855	0.180152	0.235591	0.313468	0.386936	0.398004	-0.0197407	0.078183	0.0940116	-0.00503341	0.0869703
LARS	0.0766145	0.142636	0.0340181	0.0652879	0.0654646	0.29805	0.0880204	0.140306	0.0993006	0.161241	0.106267
KLHL42	-0.0892748	-0.0350772	-0.0581039	-0.032372	-0.0201545	-0.00915405	-0.00989206	-0.169641	-0.227074	-0.276	-0.336965
KLHL13	0.103	0.0663925	0.0858275	-0.0800201	-0.0840415	-0.268951	0.0680998	0.0774235	-0.0513059	-0.127059	-0.0331651
FRMD4A	-0.140585	-0.272974	-0.19576	-0.236925	-0.385896	-0.768498	0.0558823	-0.131698	-0.205833	-0.244923	-0.14816
WRAP73	-0.294335	-0.63296	-0.505451	-0.700149	-0.695246	-1.24268	-0.157398	-0.0156566	-0.2635	-0.274631	0.0140422
EPS15L1	0.562907	0.542323	0.410812	0.652887	0.955069	0.258473	-0.389999	0.215691	-0.127701	-0.144006	-0.172753
RABL2A	-0.229333	-0.0736451	0.0842803	-0.0464946	-0.248656	0.169957	-0.250509	-0.115498	-0.11082	-0.402983	0.0784958
APEX2	NA	NA	NA	-1.06002	-0.475009	-0.965243	-0.0490079	-0.646077	-0.482138	NA	NA
UQCR10	-0.874192	0.0653364	-0.0274138	0.257301	0.156801	0.474016	0.357072	0.143007	0.650857	0.336004	0.391259
MALT1	0.148757	0.0283082	0.00442153	0.0102272	0.197923	0.469234	-0.0237957	-0.127545	-0.00422589	0.0684709	0.106808
TES	0.230938	0.406673	-0.00256724	0.0473603	0.204037	0.603196	-0.169125	-0.169714	-0.207338	-0.140504	-0.510921
SWAP70	0.0865307	0.315819	0.207334	0.251141	0.337808	0.562847	-0.0654938	-0.0117141	-0.0105096	0.00767215	0.0176508
NDOR1	-0.229636	-0.526708	-0.481427	-0.281112	-0.468827	-0.631044	0.183598	-0.0993594	0.0216695	0.0771882	0.157498
USP25	0.119234	0.117958	0.258911	0.281153	0.225077	0.319001	0.0462649	0.0534502	0.00605163	-0.0257401	0.0947761
CYB5R1	0.65377	1.18574	1.14833	1.27465	0.993769	2.68025	0.178031	0.443286	0.25645	0.0215774	0.18371
MED13	0.0203972	-0.28383	-0.00762845	-0.0472782	-0.165406	-0.360758	-0.0647666	0.0271991	-0.0561493	-0.0855417	-0.125647
PUF60	-0.347911	-0.431487	-0.457721	-0.559649	-0.495619	-1.01786	-0.206093	-0.274675	-0.238849	-0.105649	-0.033599
EIF2B4	0.0387034	0.0229539	0.059808	-0.139402	-0.316874	-0.125552	0.124523	0.067097	0.32072	0.154237	0.400796
IPO11	-0.108446	-0.262856	-0.127164	-0.247602	-0.253928	-0.322519	0.0153596	-0.0616844	-0.0749352	-0.156668	-0.0785685
TRMT6	-0.274753	-0.696603	-0.564878	-0.616023	-0.800617	-1.47628	0.0855431	-0.286615	-0.258159	-0.170466	-0.155497
HSPB8	0.452054	1.03848	0.915317	1.12308	1.10367	1.42329	0.273165	0.40314	0.229205	-0.0874366	-0.0789229
GGA2	-0.247074	-0.154757	-0.160562	-0.260639	-0.255356	-0.488485	0.233512	0.421612	0.413284	0.266198	0.35653
FBXO9	0.461777	0.530077	0.561005	0.418377	0.499495	0.377088	-0.131499	-0.0472051	-0.0445809	-0.0958666	-0.0734437
TNIK	0.241262	0.375242	0.386517	0.360436	0.171978	0.677623	-0.00608816	0.181791	0.169036	-0.0728754	-0.106932
POMT2	-0.134948	0.120662	0.0969396	0.119963	-0.263649	0.5445	NA	NA	NA	NA	NA
CCPG1	0.393942	0.631803	0.54609	0.272699	0.391707	0.982726	0.000367791	0.263205	0.140367	-0.134098	0.293108
ODF2L	0.375005	-0.00565811	-0.17821	-0.0691485	0.140583	-0.349079	NA	NA	NA	NA	NA
SUFU	0.0667604	0.0115685	0.0511346	0.0462913	0.109997	0.039839	-0.0100934	-0.0684156	-0.0521538	0.0962291	0.14231
PCDHGC3	-0.125061	-0.306333	-0.330602	-0.534926	-0.435502	-0.623852	0.350641	0.555587	0.334734	-0.17428	0.0234187
NSFL1C	0.124721	0.183148	0.0522305	0.103942	-0.0461518	-0.27739	-0.103892	-0.21043	-0.0732495	0.0345921	0.0223612
SLC12A4	0.261993	0.444498	0.439923	0.484885	0.489838	1.22104	-0.133633	-0.127591	-0.154927	-0.30108	-0.162541
AP4E1	0.0891052	-0.066883	-0.0274093	-0.0805686	-0.11096	0.187996	0.294268	0.266148	0.142205	0.11694	0.138878
TRIM33	-0.180461	-0.78695	-0.591135	-0.503874	-0.403385	-1.12591	NA	NA	NA	NA	NA
AGAP1	-0.120025	-0.0685133	-0.088693	0.0265214	-0.0254582	0.398278	0.191752	0.110034	0.015661	0.0950377	0.171294
TRAK1	0.285407	0.0753755	0.181164	-0.0598006	-0.169296	-0.474109	NA	NA	NA	NA	NA
DICER1	0.105275	0.136434	0.0551439	0.111258	0.037033	0.29348	-0.114261	-0.184491	-0.268025	-0.285303	-0.125991
MTMR6	0.233376	0.277495	0.261346	0.253746	0.305076	0.575368	-0.199554	-0.0813909	-0.122368	-0.164028	-0.169672
PIN4	-0.0688676	-0.218988	-0.114254	-0.16302	-0.164619	-0.410407	-0.276198	-0.441958	-0.291288	-0.25001	-0.0922063
VDAC3	0.0398189	0.053631	0.169749	0.189878	0.0713634	1.00554	-0.0611912	0.0177094	-0.104983	-0.171543	-0.108091
SLC5A6	-0.359299	0.0662507	0.119506	-0.230353	-0.276096	-0.428606	-0.459884	-0.347403	-0.283293	-0.162204	-0.105691
TRAPPC4	0.0174762	-0.0237052	0.113847	0.0214125	-0.00450689	0.326994	-0.0347151	0.0420936	0.0312735	-0.110081	0.0341524
TMEM5	NA	NA	NA	-0.254808	-0.177766	-0.515283	-0.322054	-0.165413	-0.159757	NA	NA
ATP11B	0.0878801	0.403003	0.383659	0.668985	0.712994	1.10883	-0.168412	0.0348319	-0.258332	-0.247157	-0.198747
WDR37	0.57058	0.928652	0.78714	0.673481	0.61001	1.09619	-0.0309208	0.117443	0.126245	0.248314	0.266526
EPB41L3	0.111719	0.351355	0.395307	0.532094	1.01134	0.571313	-0.145308	-0.429254	-0.425986	-0.608746	-0.620996
LRCH1	-0.165708	-0.205132	-0.138095	-0.255644	-0.247922	-0.432587	0.433887	0.215106	0.3022	0.519045	0.465441
WBP11	-0.258653	-0.281286	-0.602873	-0.546787	-0.368103	-1.01296	-0.318156	-0.475302	-0.420754	-0.140548	-0.282304
ACOT9	0.151607	0.266701	0.281489	0.278343	0.302353	0.751906	-0.0602543	-0.108855	-0.16784	-0.187573	-0.147294
IFT52	-0.107464	-0.186492	-0.232384	-0.410601	-0.320085	-0.712049	0.206208	0.211458	NA	NA	NA
REXO2	0.391241	0.531476	0.526946	0.532882	0.396161	0.892691	-0.135619	-0.0905555	-0.18374	-0.103707	-0.16269
UFC1	-0.14228	0.433325	0.308748	0.170959	0.212362	0.0164099	-0.18556	-0.123635	-0.0582015	0.13696	0.189662
MSRB2	0.0311211	0.275192	0.228434	0.13465	0.0612685	0.133759	-0.402133	-0.394822	-0.397077	-0.212716	-0.337602
FIS1	0.229953	0.288402	0.46824	0.624925	0.480548	1.12027	0.23868	0.36679	0.0785331	0.215187	0.0464185
GOLT1B	NA	NA	NA	-0.399971	-0.551615	-0.616884	-0.126477	-0.138837	-0.118477	NA	NA
RWDD3	2.16205	0.295456	0.956474	0.109337	-0.0013758	0.111493	0.576874	-0.0173621	0.599025	0.693767	0.643688
VPRBP	-0.399424	-0.516905	-0.569937	-0.518875	-0.499944	-0.605152	0.134573	-0.107959	0.0147226	-0.0834639	0.00326465
ZNF451.1	0.249871	-0.863071	-0.0812688	-0.307379	-0.550672	-1.23457	0.0931014	0.510163	NA	NA	NA
WIPI2	0.908949	1.04273	0.948443	1.15104	1.1888	1.70244	-0.246935	0.198069	0.052166	-0.0477206	-0.998027
SUPT16H	-0.649469	-0.934477	-0.844285	-0.9872	-0.995979	-1.61369	-0.149614	-0.293385	-0.247476	-0.108673	-0.145405
UTP18	-0.345937	-0.579756	-0.512521	-0.628752	-0.697632	-1.24774	-0.078251	-0.14802	-0.109566	-0.0730256	-0.0956376
COL4A3BP	0.0624274	0.235911	0.13789	0.158929	0.103339	0.592302	0.305596	0.377741	0.209264	-0.0415991	0.107579
GMPPB	-0.157854	-0.0515525	-0.141278	-0.0680475	-0.0813935	-0.126489	-0.0267368	-0.075914	-0.0849454	-0.159663	-0.163983
TRAPPC1	-0.00411963	0.0832402	0.131629	-0.0324598	0.0377017	0.258178	-0.11646	-0.0212071	-0.110879	-0.193441	-0.217386
NPTN	0.349654	0.923442	0.864145	0.746694	0.606894	0.604567	-0.392182	-0.261482	-0.255656	-0.210947	-0.14174
TACC3	-0.719493	-0.854374	-0.865443	-0.971303	-0.957291	-2.94089	-0.534649	-0.801524	-0.481978	-0.469965	-0.170186
SELENOK	-0.154745	-0.400284	-0.237542	-0.458566	-0.591282	-0.515598	0.161653	0.17353	0.263301	0.156948	0.349628
DYNC1LI1	0.199758	0.202455	0.155312	0.210201	0.0661063	0.472721	0.133692	0.220847	0.101906	0.0859694	0.0385314
EPN1	0.0152506	0.121112	0.18819	0.236956	0.252914	0.354328	0.306313	0.33523	0.337204	0.289831	0.163946
DNMT3A	0.531519	-0.00735541	-0.317786	-0.12356	-0.166423	-0.243688	NA	NA	NA	NA	NA
COX11	0.057385	-0.26537	-0.161197	-0.304659	-0.433934	-0.132894	-0.405911	0.0717545	-0.0428604	-0.137909	0.0703122
IVNS1ABP	-0.389323	-0.951631	-0.703795	-0.62499	-0.406607	-0.276226	-0.125355	-0.144517	-0.128651	0.115601	0.124038
FLJ10292	-0.516605	-0.799745	-0.778576	-0.838384	-0.792093	-1.2352	-0.0628909	-0.1051	-0.219741	-0.0623197	-0.0376159
SEC61G	0.00967577	-0.315058	0.107127	-0.208005	-0.144109	-0.209225	0.0384576	0.0665126	0.318171	0.160336	0.164056
APPBP2	0.0911329	-0.0956183	-0.0395721	-0.00688013	0.0737434	-0.0626202	0.043759	0.181604	0.0817634	0.241675	0.017461
TAOK1	0.0926763	0.106012	0.0200989	0.0799002	0.165143	0.0741636	0.0867075	0.117658	0.140225	0.225511	0.263355
NOL7	-0.390759	-0.508376	-0.668937	-0.536701	-0.642981	-1.1078	0.163445	0.0693862	-0.0105956	0.0469629	0.0469991
OXCT1	0.0140391	0.279122	0.192641	0.267912	-0.0263889	0.477073	-0.0547771	-0.0973831	-0.13505	-0.0831977	-0.161884
DDX23	-0.240516	-0.469922	-0.433372	-0.474676	-0.480752	-0.868257	-0.0927116	-0.187761	-0.15283	-0.083779	-0.0703572
RACGAP1	-0.796292	-1.59935	-1.28932	-1.58234	-1.70514	-3.30835	-0.150426	-0.364541	-0.255803	-0.283774	-0.165955
PDXP	-0.0534719	-0.0921192	-0.0540126	0.0422335	-0.033245	0.679797	-0.0449492	-0.0906186	0.0800066	0.125708	0.128237
RAC2	0.511301	0.513422	0.632198	0.713762	0.659854	0.870612	-0.470334	-0.878255	-1.13745	-1.36379	-1.46092
NOL8	-0.235288	-0.564899	-0.784708	-0.760124	-0.694387	-1.14642	0.128212	0.120893	0.139279	-0.0474907	0.0305781
FVT1	0.0932068	0.293898	0.353896	0.347566	0.0250402	1.27199	-0.282778	-0.0436762	-0.24015	-0.435396	-0.215284
SPIN	-0.443886	-1.01902	-0.91547	-1.02591	-0.949462	-1.82538	-0.101067	-0.396561	-0.274494	-0.00599777	0.0646215
TATDN2	0.0725631	-0.232748	-0.356078	0.022331	-0.0392311	0.317634	0.103164	0.0871197	-0.0484462	0.452718	0.332368
CHCHD4	-0.196847	-0.830007	-0.2598	-0.204682	-0.505236	0.686019	0.711034	0.564939	0.488168	0.152251	0.165861
TMEM43	-0.0828889	0.195676	0.107977	0.183873	0.339742	0.293669	-0.360965	-0.243816	-0.185257	-0.027039	0.051374
MAP4	0.0627342	0.0282843	-0.00511446	0.109731	0.209484	0.536262	0.229517	0.291831	0.215949	0.32472	0.0679332
DAG1	-0.0203639	0.192098	0.0684042	-0.0413406	0.307217	0.334364	-0.0174261	0.0447024	-0.0290218	-0.14683	-0.156073
TMEM113	-0.313523	-0.532953	-0.475702	-0.505609	-0.361778	-0.67981	0.0489238	0.105539	-0.136532	0.0230437	-0.10031
PANX1	-0.234744	-0.576217	-0.577367	-0.851326	-0.540569	-0.830559	0.0188283	0.016549	-0.114909	-0.120618	-0.0213132
SNF1LK2	0.230298	0.304056	0.252358	0.487389	0.429187	0.718644	0.108918	0.227138	0.269958	0.00661337	-0.0586243
VPS26B	0.318931	0.322207	0.30383	0.435047	0.412209	1.04459	0.0848086	0.338989	0.193681	0.127692	0.0902745
NRGN	-0.201027	-0.616023	-0.650286	-0.660076	-0.025498	-2.19382	0.262693	0.48735	0.628212	0.832126	0.606549
MLPH	0.346895	0.521852	0.467799	0.451019	-0.163448	0.90649	0.677829	0.751906	0.678076	0.161804	0.565687
SBF1	0.296071	0.35005	0.396756	0.465901	0.487475	0.83319	0.121134	0.205215	0.166365	0.139221	0.175915
MRGPRF	-0.149534	-0.305729	-0.252915	-0.3907	-0.165944	-0.971836	-0.506209	-0.562885	-0.385374	-0.502182	-0.262366
KIAA0256	0.156126	-0.0694808	0.0571089	0.0509867	0.158525	-0.0966958	0.112151	0.0579428	0.0643506	0.142013	0.238206
USP8	-0.0716452	-0.0855472	-0.0845208	-0.0996119	-0.223619	-0.403601	0.0883066	0.200868	0.181253	0.134839	0.0760406
SLTM	-0.121209	-0.529914	-0.428594	-0.571254	-0.556793	-0.87949	0.424311	0.444835	0.505484	0.498705	0.350257
CLPX	-0.0363219	0.0186288	-0.00220126	-0.0379612	0.0371436	-0.362917	-0.210745	-0.122779	-0.118457	-0.0106754	-0.0687121
hCG_2027080	-0.168315	-0.199329	-0.263434	-0.146637	-0.453834	-0.165449	0.17226	-0.0626131	0.0245394	-0.0444904	-0.0375568
SLC35E1	-0.017855	0.237828	0.192392	0.284363	0.192097	-0.0199556	-0.277096	-0.260771	-0.153226	-0.244878	-0.176907
GATAD2A	-0.374148	-0.624643	-0.635268	-0.71368	-0.695353	-1.4462	-0.0489495	-0.197116	-0.178196	-0.131247	-0.0921584
KIAA1191	0.313928	0.766001	0.691056	0.899438	0.997279	1.67357	0.288177	0.0606105	0.146668	0.245593	0.239182
TCEB1	-0.0264534	0.100767	0.127033	0.241573	0.114813	0.45481	-0.020864	0.0951755	0.107821	0.0193095	-0.0685472
ARPC5L	0.128509	0.221558	0.201632	0.104151	0.0475409	0.555075	-0.0887426	-0.065106	-0.0421307	-0.119991	-0.0295905
USP20	0.259486	0.207728	0.490622	0.301805	0.0906578	0.464783	0.596288	0.351464	0.463823	0.361739	0.473345
TK1	-0.836201	-1.67284	-1.23725	-1.61759	-1.82149	-4.05359	-0.337879	-0.702189	-0.488116	-0.436904	-0.103971
MPZL1	0.16054	0.820104	0.367467	0.202142	-0.28502	0.626204	NA	NA	NA	NA	NA
CACYBP	-0.398896	-0.375656	-0.517338	-0.438877	-0.441314	-1.20183	-0.0460866	-0.111788	0.179123	0.219801	0.19084
COX6C	-0.0550163	0.719024	0.172237	0.48842	0.484359	0.0970623	-0.586676	-0.161068	-0.0977362	-0.066319	-0.112685
RAD21	-0.476304	-0.937695	-0.809922	-0.902594	-0.848221	-1.5888	-0.157861	-0.52076	-0.421467	-0.105674	-0.179927
STK17A	0.264065	0.24446	0.293267	0.338579	0.256374	0.421113	-0.171787	0.00357681	-0.163291	-0.679569	-0.36656
CDC2L5	-0.121028	-0.434883	-0.499913	-0.428957	-0.349639	-0.571745	0.331256	0.106803	0.436082	0.650224	0.62587
GLI3	NA	NA	NA	0.136219	-0.0122345	-0.581629	-0.00270932	0.204441	-0.102841	NA	NA
ARHGDIB	0.859848	0.85289	0.878148	0.556705	-1.18049	-1.70449	-0.766994	-1.32875	-1.27003	-1.31237	-1.25751
KRAS	0.306909	0.861364	0.621134	0.500039	0.606052	0.528058	-0.612832	-0.0425362	-0.131393	-0.0932652	-0.0108843
NUDT4	0.0638974	0.152799	0.0897772	0.0991186	-0.159127	-0.102655	-0.0777254	-0.0914189	-0.198753	-0.16611	-0.0920204
TCP11L2	-0.670388	-0.761147	-0.820173	-0.880828	-0.106268	-0.153039	-0.164958	0.24959	0.253071	0.464103	0.465197
IFT81	-0.113086	-0.224126	-0.202275	-0.177672	-0.224893	-0.367118	0.130138	0.0567013	0.0437294	0.0252903	-0.024739
hCG_1981838	-0.449147	-0.835375	-0.657214	-0.96048	-1.03544	-1.5582	-0.11421	-0.528575	-0.428751	-0.0535737	-0.00628577
hCG_1991723	0.245323	0.316938	0.333562	0.663547	0.691574	1.06815	0.0277602	0.268841	0.175739	0.304801	0.213425
PTDSS2	0.641449	0.756006	0.554782	0.960025	0.793499	1.38928	0.155739	0.19344	0.0160871	-0.141661	-0.170868
VARS	-0.0623165	0.0783095	-0.0289139	-0.0171767	-0.0150068	0.292156	-0.0910031	-0.012132	-0.0376801	-0.161914	-0.164499
GNL1	0.0231408	0.114834	0.140171	0.175417	0.117521	0.572621	0.164632	0.122719	0.011444	0.067655	0.0528559
MRPS10	-0.219914	-0.299631	-0.264055	-0.191744	-0.299176	-0.367405	-0.106367	0.133051	0.0738697	0.0437921	-0.0232133
MRPL14	0.106439	-0.072295	-0.0522767	-0.117347	-0.0459735	-0.162228	-0.0447293	-0.127314	-0.0295377	-0.327511	-0.27302
ZNF198	-0.210177	-0.299804	-0.330683	-0.183782	-0.187094	-0.538333	0.101923	0.00700704	-0.130963	0.0132842	-0.0252249
ITGBL1	0.452784	0.291815	0.366542	0.652746	1.33722	1.72844	0.212666	0.202918	0.120109	-0.194753	0.0236161
RYK	0.215823	-0.613827	-0.400001	-0.309543	-0.398635	0.112665	0.737926	0.669596	NA	NA	NA
C19orf68	-0.352767	-0.854491	-0.793777	-0.563406	-0.468511	-0.935605	0.320985	-0.0752709	0.408801	NA	NA
APOOL	0.116784	0.462735	0.227562	0.332491	0.298828	0.860555	-0.362771	-0.48318	-0.453715	-0.516653	-0.303046
DHX29	0.0586309	0.0134797	0.103181	0.109039	0.125667	0.0881275	0.0320522	-0.0817439	-0.00241829	0.00994578	0.0871363
NOL4L	0.41351	-0.0765201	0.0151127	-0.0667713	0.298197	0.204249	-0.109858	-0.129378	-0.159964	-0.374549	-0.558271
HECTD1	-0.0256974	-0.0440882	-0.0124162	-0.00493167	0.0326086	-0.231186	-0.0097075	-0.0671307	-0.0164231	-0.0504947	-0.0390481
C7orf24	0.220249	0.150267	0.234257	0.201726	0.0743333	0.472466	-0.354748	-0.321752	-0.162859	-0.186741	-0.158668
DOCK1	0.039616	0.0416131	0.0923498	0.0988661	0.269761	0.342049	0.014579	0.176856	0.137259	0.40107	0.263005
COX2	-0.00502048	0.236863	0.0768408	0.276547	0.146252	0.303452	0.254203	0.37436	0.179248	0.187884	0.210837
CLASRP	-0.212992	-0.607918	-0.505208	-0.603192	-0.631827	-1.03051	0.352615	0.166203	-0.0175869	0.188072	0.118098
RBP1	-0.243837	-0.813691	-1.22372	-2.16765	-3.24049	-3.76855	-0.353417	-0.701785	-1.09341	-0.920106	-1.26593
RPL17-C18orf32	-0.218547	-0.366953	-0.254448	-0.127799	-0.243962	-0.462203	0.0381532	-0.0718769	-0.0776679	-0.112837	-0.162187
MDM2	0.0215174	0.233393	0.392845	0.177316	-0.00665074	-0.28903	0.0947306	-0.384246	-0.162325	-0.453001	0.157599
CDYL2	-0.214908	-0.559179	-0.542702	-0.698605	-0.487012	-1.27472	-0.38726	-0.740091	-0.520015	-0.368681	-0.198384
ZCCHC11	0.00193983	-0.186995	-0.140135	-0.198487	-0.155577	-0.409302	0.0646177	-0.024612	0.0784047	0.087565	0.123937
COBLL1	0.251241	0.350093	0.341774	0.535346	0.701504	0.967816	0.30681	0.386346	0.503533	0.64689	0.693279
SPTAN1.1	0.292658	0.502442	0.377514	0.494316	0.424553	0.552184	-0.0905243	-0.0461549	-0.058232	-0.100354	-0.111273
OCLN	0.676211	1.35276	1.30792	1.15886	1.60336	0.871137	-0.323514	-0.215947	-0.282006	-0.277961	-0.576699
BCL2L1	-0.0390591	0.0436736	0.171438	0.166269	0.269227	0.464205	0.0624017	0.237249	0.0131498	-0.233988	-0.206634
CLPTM1	0.0559585	0.244189	0.00430682	-0.0435644	-0.162491	0.204853	-0.370058	-0.158582	-0.235964	-0.394801	-0.273045
ATP2A2	-0.0389754	0.0952177	0.136969	0.214687	0.274229	0.673415	-0.156293	-0.0884546	-0.073874	-0.0837803	-0.06646
MPV17	0.153688	0.470004	0.398337	0.529684	0.385921	1.47453	0.0404049	0.262629	0.208577	0.0880054	0.0770537
NDUFS4	-0.135405	0.319821	0.0343656	0.194274	0.157434	0.348207	-0.155891	-0.102862	-0.0899808	-0.156064	-0.2139
PMM2	0.441512	0.496265	0.534135	0.455153	0.530071	0.820903	-0.109216	0.0389738	-0.0211335	-0.169976	-0.143358
DAZAP1	-0.105768	-0.42162	-0.429333	-0.469101	-0.370409	-0.82957	-0.00149268	0.0147867	0.0184279	0.141688	0.0820842
CWF19L1	-0.645467	-1.19037	-1.02037	-1.26157	-1.31077	-2.41487	-0.0234189	-0.190525	-0.0798571	0.0120884	-0.047846
DIP2C	0.207022	0.299061	0.258866	0.2738	0.179577	0.44716	0.183986	0.166399	-0.0423799	-0.00076008	0.0422747
DENND4A	0.221716	0.26273	0.155735	0.537029	0.495106	0.52725	0.287179	0.0292658	0.0582566	0.244781	0.10726
CMTR2	-0.214438	-0.365481	-0.464661	-0.49004	-0.656334	-0.709449	0.0394068	0.0603514	0.0195863	-0.030068	-0.184341
HLA-B	-0.00125639	0.314935	0.721743	0.722612	0.442	0.7629	0.0763048	-0.0174371	-0.453739	-0.180909	-0.425345
GALNS	0.4697	0.552488	0.547504	0.797939	0.831836	2.13271	-0.37428	-0.312744	-0.303602	-0.326849	-0.293676
PXN	0.144736	0.21829	0.126971	0.230844	0.361037	0.063245	-0.174631	-0.111998	-0.0400194	0.0124248	0.0301792
EVI5	0.572251	0.607567	0.621404	0.791781	0.868403	0.375467	NA	NA	NA	NA	NA
BTBD8	0.292213	0.551385	0.574503	0.745884	0.962049	0.643183	-0.150562	-0.453278	0.183318	0.348831	0.453655
SRGAP2	0.0727474	-0.0516978	-0.103561	-0.138077	-0.00635944	-0.124424	0.197782	0.260663	0.303754	0.452048	0.376945
UNC84A	-0.062178	-0.230392	-0.197019	-0.174079	0.194642	0.120914	-0.0248375	0.0222457	-0.00322269	0.023206	0.073269
GABPA	-0.375213	-0.848937	-0.600611	-0.719932	-0.732255	-1.38584	-0.0759768	-0.180447	-0.138978	0.0162542	-0.0754648
UMPS	-0.126266	-0.0791961	-0.111157	-0.123805	-0.280534	-0.235899	-0.015417	-0.0457234	-0.104404	-0.11552	-0.1126
ATG5	0.241438	0.042195	0.116824	0.135083	0.0685962	0.306928	0.0661373	0.0455986	0.0482998	0.00714837	-0.0498359
APOBEC3B	-0.975989	-1.68599	-1.37677	-1.43618	-1.4718	-3.10954	-0.270983	-0.530148	-0.462982	-0.30352	-0.301816
TFEB	0.377974	0.205627	0.223563	0.704175	0.578843	1.25929	0.172295	0.37887	NA	NA	NA
LAMA3	0.297581	0.309863	0.455876	0.406071	0.532497	1.03453	NA	NA	NA	NA	NA
SNIP1	-0.0885879	-0.558329	-0.31657	-0.33685	-0.234993	-0.812134	-0.109957	-0.258738	-0.173268	0.00875115	-0.0245222
NRDC	0.0825916	0.0720323	-0.00177191	-0.0428564	0.0685945	-0.0233927	-0.0586287	-0.0309681	-0.0390477	-0.0991556	-0.0967517
CIAO1	0.0825061	0.0531581	0.0230267	0.0398157	-0.000965006	0.053209	-0.0374911	-0.0509882	0.00442266	-0.055682	-0.0365227
NUBP2	-0.0582263	-0.0794945	0.0582016	0.0719831	-0.013615	0.00445148	0.151273	0.00663845	0.127148	0.10317	0.157232
HEATR1	-0.272655	-0.572629	-0.553823	-0.668331	-0.700018	-1.15486	-0.0507237	-0.188503	-0.121103	-0.208455	-0.176343
COL5A1	0.544517	0.477433	0.362544	0.068368	0.783789	1.13599	-0.299187	0.344214	NA	NA	NA
SRA1	0.241781	0.291368	0.236944	0.273566	0.128392	0.253646	-0.113616	-0.22777	-0.188249	-0.158483	-0.201131
SEC61A1	-0.173905	-0.174213	-0.0494011	-0.0270637	-0.1173	-0.0233954	-0.105926	-0.0834622	-0.0137746	-0.00698635	-0.0358683
APIP	-0.127933	0.0636324	0.109311	0.132219	0.0013933	0.872403	0.29909	0.386099	0.190486	0.255651	0.121795
PKMYT1	-1.37839	-2.16042	-1.97611	-1.81833	-1.86022	-5.06825	-0.0787515	-0.517782	-0.53609	-0.674908	-0.354046
PEX5	0.0570333	0.0788207	0.129455	0.228369	0.209781	0.301337	0.0226688	0.13214	0.0535486	0.0192569	-0.052817
ARFIP1	0.126873	0.444037	0.45579	0.63879	0.578101	0.69513	0.0836914	0.161382	0.175857	0.303107	0.274879
RIC8B	0.0973707	-0.312105	-0.361212	-0.503955	-0.430652	-0.185894	0.0575778	-0.0130941	0.075532	0.163904	0.196961
KIAA0528	-0.0948324	-0.29474	-0.277908	-0.342604	-0.479769	-0.585558	0.0577773	0.106864	0.0697145	0.0862295	0.0210011
TAX1BP1	0.0733795	0.0684659	-0.00263294	-0.368003	-0.248502	-0.708113	0.114553	0.0887204	0.00828011	-0.184542	0.0069131
SPG11	-0.0761448	-0.258462	-0.133733	-0.0746927	-0.320674	0.264012	0.0896728	0.190971	0.305049	0.102315	0.0910558
DRAP1	-0.310865	-0.441032	-0.587583	-0.458735	-0.35167	-0.809662	0.0251234	0.012828	-0.0781766	-0.0308129	0.0953627
SPRED2	0.3124	0.110629	0.284567	0.148967	0.617833	1.12133	0.398392	0.449122	0.314835	0.227656	0.223612
CHCHD3	-0.025998	0.0391076	0.167536	0.0640408	-0.0759682	0.635382	0.124015	-0.00358985	0.0378681	-0.0678114	0.0297722
ACTB	-0.397477	-0.781175	-0.673524	-0.824584	-0.737043	-1.73504	-0.411005	-0.0784458	-0.0903113	-0.0974219	-0.0422491
CEP55	-0.953663	-1.6956	-1.34936	-1.47929	-1.5295	-3.30645	0.111224	-0.261447	-0.133626	-0.0219389	0.190213
SLC19A1	-0.468481	-0.803197	-0.626178	-1.28506	-1.0836	-1.79726	0.157958	-0.0239667	-0.0041186	0.0552552	0.264602
NES	0.344183	0.169998	0.101921	0.498922	1.34467	1.47871	0.550337	0.461829	0.570064	0.599673	0.351383
UBL7	0.23504	0.341834	0.287525	0.256153	0.332355	0.296338	-0.0106577	0.101745	0.0131304	0.084439	0.0131467
CANX	-0.0763962	-0.560401	-0.357717	-0.106131	-0.0883716	0.567723	0.665749	0.763428	1.01469	0.543668	0.42454
ADAT3	-0.303869	-0.46876	-0.526446	-0.814841	-0.705027	-1.58615	-0.111178	-0.051761	-0.0475288	-0.216158	-0.133744
ACADS	0.0173928	0.212691	0.423238	0.456091	0.451388	1.66624	NA	NA	NA	NA	NA
TBCA	-0.263887	0.222629	-0.0326999	0.2113	0.191154	0.141215	-0.170535	-0.166224	-0.0915859	0.038087	-0.148443
FABP5	-0.177988	-0.168375	-0.232626	-0.168722	-0.607348	-1.45761	-0.233677	-0.228927	-0.0716893	-0.19637	-0.329139
TSEN34	-0.0253329	-0.841014	-0.545135	-0.64737	-0.706912	-0.948123	0.343395	-0.0312343	0.085183	-0.31862	-0.0735718
PTK2	0.132874	0.251943	0.264484	0.356347	0.430633	0.786077	0.225162	0.304861	0.306809	0.416354	0.330762
RAVER1	-0.448696	-0.469046	-0.448405	-0.473197	-0.382238	-1.34589	-0.358037	-0.549196	-0.432707	-0.0827065	-0.151812
DENND3	0.347801	0.490578	0.579685	0.584613	0.774082	1.49188	0.388027	0.771866	0.707267	0.594487	0.506802
PARP10	-0.0349973	-0.0181634	-0.014394	-0.0521735	0.242806	-0.241157	0.110956	0.20151	0.0816236	0.0946751	0.152325
NAA40	-0.153031	-0.339059	-0.294708	-0.275416	-0.187271	-0.533755	-0.0918599	-0.182488	-0.139163	-0.211938	-0.279877
HEATR5A	0.170845	0.264287	0.261817	0.340749	0.320819	0.693259	0.0126683	0.099528	0.0983159	0.0435311	0.1737
HLA-A	0.120962	-0.354277	0.250444	-0.21571	-0.130197	-0.556727	0.279525	0.491681	0.443895	0.274798	0.262672
SIMC1	0.45247	0.826888	0.152271	0.484942	0.3891	-0.504083	0.685914	0.265193	0.592837	0.754673	0.507828
DKK3	0.27196	0.434334	0.42058	0.405305	0.296846	0.7067	0.151038	0.380263	0.206893	0.00982913	0.126208
TDRKH	0.489049	0.799151	0.739622	0.996001	0.861108	2.01546	0.0950389	0.312973	0.256005	-0.257032	-0.333894
COPZ1	0.0953286	0.0803858	0.0344906	0.141126	0.165407	0.0431372	-0.0292253	-0.0110361	0.106397	0.00878327	-0.135039
FGD4	0.622214	1.18914	1.25124	1.28808	1.3568	1.45535	0.0728792	0.422135	0.468077	0.666935	0.798319
ATXN2	-0.239941	0.143667	-0.0117298	0.139409	-0.568135	-0.926062	NA	NA	NA	NA	NA
MTAP	-0.0987079	-1.04633	-0.337123	-0.467643	-0.596984	0.0712175	1.2154	1.04375	0.893143	0.434995	0.416509
TOGARAM1	0.200926	0.869708	-0.0609999	0.8296	0.0682117	0.135436	-0.303834	-0.201621	-0.00678849	-0.159278	-0.325677
COX7A2	0.0167935	0.313499	0.277093	0.423231	0.327826	0.407245	0.264103	0.162214	0.284238	0.0634094	0.326877
FLNA	0.24721	0.572367	0.61809	0.708716	-0.31362	0.374929	NA	NA	NA	NA	NA
NDUFB5	0.125894	0.389172	0.448632	0.616541	0.438759	1.06462	0.336	0.388196	0.0303143	-0.0769131	-0.0820878
RAPGEF2	0.112129	0.184153	0.201521	0.369394	0.555269	0.898517	0.236598	0.0521177	-0.910652	-0.43427	-0.124093
ANK2	0.617759	0.962311	1.0754	1.46677	1.27842	1.49039	1.12624	1.21713	1.1406	1.01278	0.560842
PCDH7	1.32543	-0.118026	0.095902	0.248496	0.780228	0.551439	NA	NA	NA	NA	NA
MTDH	-0.413418	0.0479616	0.180508	0.541711	0.254621	0.481784	0.943147	0.663021	0.577059	0.778687	0.117727
RPS27L	0.0839655	0.121895	0.133634	0.195762	0.507495	0.27241	-0.229754	-0.0780516	-0.168759	-0.174605	-0.218472
SPPL2A.1	-0.0976314	0.0287952	0.166162	-0.350249	-0.39468	0.397165	-0.100555	0.0543277	-0.262259	-0.485234	-0.177863
NUB1	-0.0176622	-0.0724336	0.00175478	-0.0182039	0.0223365	0.136172	-0.262385	-0.314382	-0.182335	-0.202963	-0.16765
UTP4	-0.171321	-0.591317	-0.507562	-0.591836	-0.594006	-0.950351	0.209212	0.028029	0.00394172	0.00880261	0.0720946
PKM	0.523537	0.817995	0.700439	1.00618	0.600015	1.70972	-0.0742923	-0.0889983	0.0409173	-0.224977	-0.130954
MICA	0.305396	0.447805	0.260472	0.35018	0.28326	0.700936	-0.0477845	0.0603858	-0.0770381	-0.387054	-0.280477
PCMT1	-0.0410561	0.204494	0.0520603	0.0984798	0.0652172	0.56037	-0.144282	-0.138941	-0.134035	-0.157519	-0.142915
CHD3	-0.534364	-0.820752	-0.443638	-0.0797062	-0.858028	-1.90587	NA	NA	NA	NA	NA
ACTN4.1	0.64724	0.702614	0.486261	0.735614	0.463561	0.301554	-0.182716	-0.140796	-0.102432	0.178319	-0.0516893
BCL7C	-0.47675	-0.935063	-0.65772	-0.96269	-0.6939	-1.38942	0.61103	0.246165	0.317038	0.383088	0.427715
PCTP	0.25777	0.319667	0.223564	0.0840925	-0.00331249	0.223868	-0.0488056	-0.0511526	-0.042882	-0.0379499	-0.0786494
OXA1L	-0.0343743	-0.0747102	-0.0749465	-0.134936	-0.232189	-0.0998827	-0.186809	-0.162941	-0.18987	-0.237685	-0.266013
SEMA4B	-0.0841115	-0.372967	-0.215193	-0.488989	-0.481831	-0.56761	0.289143	0.439991	0.434587	0.280487	0.241827
AGTPBP1	0.242389	0.701166	0.264555	0.156722	-0.122782	0.190085	-0.186744	-0.0941141	-0.0648374	-0.0622414	0.0595052
TM2D1	0.395611	0.469459	0.409869	0.378089	0.300169	1.32249	-0.175689	-0.0218047	-0.283645	-0.409007	-0.0468939
ARMC5	0.292106	-0.085658	0.149741	0.144734	0.0862552	0.487156	NA	NA	NA	NA	NA
PTRH2	0.304832	0.436413	0.462135	0.501089	0.234027	0.859697	0.0313389	0.196562	0.0488247	-0.00927944	0.0443338
DDX5	-0.249164	-0.661883	-0.618229	-0.846872	-0.807354	-1.59141	-0.169832	-0.380491	-0.379752	-0.329813	-0.231666
SCRN2	0.3151	0.440591	0.584599	0.71375	0.700141	1.49869	0.214023	0.433511	0.150882	0.170429	0.213228
RPL18	-0.382503	-0.0669164	-0.133239	-0.150458	-0.0843954	-0.683127	-0.540562	-0.507901	-0.335087	-0.190494	-0.228729
YES1	0.18268	0.118843	0.2345	0.199443	0.164915	0.474575	-0.0825232	-0.0252767	-0.202467	-0.158723	-0.202852
AES	0.166556	-0.221439	-0.333763	-0.2153	-0.0559591	-0.520568	-0.0302829	-0.102469	-0.106328	0.113105	-0.15343
CHTF8	NA	NA	NA	0.238315	3.12609	1.16978	0.251843	0.0308809	0.568256	NA	NA
C11orf48	-0.253499	0.0687303	-0.37677	-0.217314	-0.24771	-0.93505	-0.351445	-0.53887	-0.362956	-0.00427757	-0.179911
PRKCA	0.252692	0.29961	0.199342	0.234012	0.120243	0.0347253	0.121752	0.314972	0.341997	0.458296	0.361155
PSG3	0.174704	0.185123	0.105639	0.0615084	0.15833	0.0598361	-0.17403	0.056751	-0.154877	-0.240532	-0.0128335
RPL13A	-0.363685	-0.0594648	-0.328825	-0.153076	-0.236121	-0.653116	-0.363157	-0.480049	-0.265549	-0.215209	-0.266764
HNRNPM.1	0.0457006	-0.176684	-0.181258	-0.333216	-0.186549	-0.908407	0.137929	0.195634	0.128182	0.11511	0.0341769
MRPL34	0.038455	0.0149298	-0.014546	-0.0179499	-0.101438	-0.0445013	-0.0266254	-0.0693684	-0.220749	-0.311377	-0.213969
POLD1	-0.538396	-0.954958	-0.782824	-0.890898	-0.939553	-1.6019	-0.123976	-0.466699	-0.155348	0.0814581	0.0774838
UBA52	-0.0835929	-0.204031	-0.413136	-0.294158	0.0242126	-0.129709	0.0609732	0.232933	-0.0142465	-0.221065	0.302909
PRNP	0.141626	0.391797	0.466381	0.66765	0.340539	1.40876	0.226847	0.62413	0.441742	0.232964	0.170145
EXTL2	0.000584745	0.188627	0.179677	0.0431732	-0.0930564	0.192061	-0.210125	0.0323565	0.238433	0.265846	0.32151
DOCK4	-0.146916	-0.322109	-0.0945025	-0.120313	-0.117864	0.108807	0.277508	0.307117	0.108294	0.0366807	-0.00603568
CLSPN	-0.642749	-1.59364	-1.27043	-1.426	-1.27089	-2.62602	0.0936588	-0.640089	-0.0846578	-0.677734	0.550344
FKBP5	-0.563927	-0.937263	-0.797172	-0.945788	-0.899613	-2.13332	-0.0914284	-0.400476	-0.238853	-0.115308	-0.0866346
CAV1	0.430784	0.470909	0.473553	0.485265	0.623635	1.14623	-0.0895746	-0.0218284	-0.0361692	-0.0761795	-0.288908
COII	-0.11917	-0.145669	0.0149965	0.0956713	-0.375286	0.0676439	NA	NA	NA	NA	NA
RALY	-0.550847	-0.514777	-0.47636	-0.691269	-0.595462	-1.46054	-0.200111	-0.341588	-0.287126	-0.225856	-0.17278
ARPC2	0.177389	0.304125	0.358075	0.337195	0.316626	0.685836	-0.168946	-0.0136649	-0.0746605	-0.221281	-0.202248
PPP2R5E	0.0454308	-0.146709	-0.108443	-0.154829	-0.134048	-0.134473	-0.0593014	-0.0662896	-0.023389	-0.157597	-0.0306885
ACT	0.0988627	0.243253	0.168796	0.294978	0.210663	0.435516	-0.0920038	-0.0292762	-0.336087	-0.0947713	-0.0464635
DKFZp686L20222	-0.686658	-1.40389	-1.10671	-1.38408	-1.44034	-3.07822	-0.217095	-0.467146	-0.325464	-0.285119	-0.0908783
RPS8	-0.260946	-0.255555	-0.271606	-0.254605	-0.250523	-0.535305	-0.0729196	-0.154837	-0.153297	-0.119863	-0.14405
PYGO2	-0.224918	-0.566838	-0.653472	-0.707917	-0.556549	-1.24763	-0.132228	-0.106568	-0.0614976	0.11177	-0.0694187
AK1	0.384317	0.58886	0.648359	0.874076	0.754365	1.52196	-0.0168744	0.16959	-0.0629216	-0.158663	-0.23159
DOPEY1	0.444845	0.00715134	0.052132	0.365022	0.379429	1.23907	0.0982173	0.275567	0.423246	0.585607	0.442605
CSNK2A1	-0.129226	0.0109928	-0.0670489	-0.102726	-0.245942	-0.230792	-0.325687	-0.495295	-0.33569	-0.215203	-0.257176
ADD3	0.236168	0.287066	0.32825	0.410372	0.430947	0.282074	0.0307086	-0.0328048	-0.102115	0.0825001	0.0230658
PSMD4	0.124652	0.137728	0.0915543	0.123691	0.144933	0.261231	-0.0589916	-0.0915869	-0.0281685	-0.0586384	-0.0226013
RBM17	-0.459976	-0.448927	-0.571156	-0.565717	-0.555168	-1.05573	0.016586	-0.16324	-0.015838	0.208614	0.167588
DKFZp686K23100	-0.333247	-0.943933	-0.630682	-0.457325	-0.596137	-0.846278	0.654069	0.137351	0.2469	0.19538	0.133772
WNT5A	0.430605	0.27219	0.485451	0.742678	1.21883	1.30214	-0.0598422	-0.332815	-0.364355	-0.222029	-0.356979
CYR61	0.0221912	-0.124544	-0.118591	-0.676787	-0.334686	-0.437174	0.311133	0.346836	0.379072	-0.0168869	0.112227
KBTBD7	NA	NA	NA	-0.0716542	0.153937	-0.495173	-0.424923	-0.308766	-0.113784	NA	NA
DUSP10	-0.0868551	0.403268	0.411927	0.110322	-0.25105	-1.12793	-0.0987391	-0.138678	0.0254556	0.0486125	0.254673
EIF3E	-0.0475487	-0.14895	-0.185503	-0.201538	-0.149806	-0.265947	-0.0361159	-0.109454	-0.0334956	-0.0925337	-0.0207237
HNRPK	-0.255302	-0.54413	-0.445528	-0.523115	-0.338599	-0.983831	0.0321609	-0.111033	0.0204248	0.0456489	0.0985365
NEU1	0.327098	0.308232	0.21795	0.104895	0.229875	0.901951	0.138335	0.203804	0.0725208	-0.340586	-0.0483883
DKFZp686J1286	0.178782	0.237962	0.298907	0.385886	0.258046	0.489678	0.0913676	0.364489	0.215936	0.279301	0.0894672
JOSD2	0.620489	0.362607	0.38271	0.537871	0.372805	0.725187	-0.391077	-0.208072	0.0786012	0.0156257	0.158383
C22orf9	NA	NA	NA	0.685602	0.830245	1.6493	-0.0197249	0.309601	0.30909	NA	NA
ICAM5	0.607374	0.411965	0.519611	0.408912	1.22438	1.60247	0.0659857	0.0301999	0.0305088	0.24434	0.387738
OSBPL7	-0.0796553	0.116689	0.159124	0.0395992	-0.00368272	0.0669923	NA	NA	NA	NA	NA
RJD9	0.0484308	0.21397	0.0597987	0.12047	-0.0944531	0.220516	-0.0632068	0.136903	-0.0769807	-0.175908	-0.0786075
G4	0.108856	0.23922	0.0963821	-0.126213	0.195837	-0.118842	-0.461766	-0.607661	-0.181308	-0.0689381	-0.102162
H6PD	0.281733	0.474353	0.549588	0.697154	0.749297	1.14544	-0.0898054	0.0537252	-0.133323	0.0914815	-0.0331756
FNBP1L	0.334778	0.361332	0.379994	0.363643	0.450102	0.48842	-0.0368475	0.138663	0.410235	0.62465	0.375213
HEL-S-89	-1.14571	-2.77394	-1.9773	-2.1461	-2.53344	-3.20504	NA	NA	NA	NA	NA
HEL-S-162eP	0.0767654	0.233457	0.144472	0.187331	0.243356	0.620576	0.0542702	-0.00135901	-0.0439949	-0.112119	-0.0630161
HEL-S-123m	0.112042	0.367035	0.282926	0.350566	0.284673	1.00742	-0.139065	-0.0257707	-0.0670598	-0.124977	-0.179535
HEL-S-106	0.22891	0.42395	0.344073	0.40781	0.241215	0.849602	0.0713112	0.151732	0.0373557	-0.0422572	-0.0238737
ST7	-0.0799227	-0.15645	-0.189798	-0.237009	-0.184656	-0.0677135	0.0157032	0.00136941	-0.113592	-0.221369	-0.0332124
SLC27A3	-0.0369135	0.219725	0.120227	0.114449	-0.220103	-0.432279	0.32655	0.671674	0.493185	0.455109	0.557915
SH3PXD2B	-0.0360035	-0.15527	-0.112666	-0.237487	-0.350579	-0.320717	0.264934	0.356131	0.309908	0.318818	0.156762
CNOT1	-0.130765	-0.34511	-0.287591	-0.355038	-0.326308	-0.615178	0.00480855	-0.0246682	-0.0909179	-0.0438373	-0.0442674
ARHGAP32	-0.130363	-0.718173	-0.493709	-0.397045	-0.438127	-1.05859	0.0858965	0.288404	0.128641	0.263209	0.426492
STXBP3	0.137397	0.248025	0.231637	0.190488	0.117283	0.32711	-0.159974	-0.0036411	-0.0650508	-0.164585	-0.146846
ARVCF	0.186294	0.386665	0.419226	0.159074	0.122931	0.271624	0.377254	0.322562	0.237534	0.147202	0.20177
SUPT5H	-0.302402	-0.616053	-0.33181	-0.677376	-0.988199	-1.75141	-0.160871	-0.400674	-0.455284	-0.634957	-0.28491
SUPT5H.1	-0.221722	-0.57083	-0.450679	-0.545599	-0.664296	-0.778149	0.0408186	-0.0386019	-0.0857923	-0.136297	-0.0696118
EML1	0.179346	0.0248766	0.0634712	0.159977	0.18576	0.742359	-0.0733119	0.147257	0.0915176	0.0698844	0.0129477
AGRN	0.170488	0.0467148	0.185669	0.28401	0.470075	0.229618	0.393551	0.480814	0.445561	0.382555	0.500989
TXNDC9	-0.00985396	-0.17813	0.0314217	-0.138281	-0.143738	-0.164144	0.0194689	-0.0481085	-0.0330782	-0.150754	-0.0930274
DYNC1I1	0.241401	1.19036	1.18802	0.807113	0.346542	3.65105	-0.0938073	-0.245231	-0.290132	-0.0720567	0.245654
COPE	0.130563	0.0699924	0.0536249	0.0883693	0.163387	0.100286	0.00624309	0.0906674	-0.00914301	0.00711436	-0.145065
MAP2K7	-0.247486	-0.12086	-0.297732	-0.184352	-0.0805648	-0.220063	-0.0926673	-0.227762	-0.0847992	0.0129778	0.0724455
BCKDK	-0.619154	1.23058	0.712487	0.918176	1.05779	0.234451	-1.43099	-1.45677	-1.53111	-0.863103	-0.796499
KIAA0355	0.00845523	-0.32473	-0.428584	-0.275975	-0.0860736	-0.35759	-0.367858	-0.0601798	0.142264	0.0218605	0.191724
KIF3B	0.0565755	0.145471	0.113555	0.171397	0.177388	0.440579	0.0145711	0.00934565	0.0281774	-0.115114	-0.0553742
SNPH	0.360985	0.6916	0.529718	0.643811	0.229203	1.12287	0.419262	0.438599	0.378652	0.121906	0.40413
NKRF	-0.243698	-0.520443	-0.527067	-0.684921	-0.665856	-1.15826	-0.0570003	-0.0996915	-0.111315	-0.159456	-0.18035
NVL	-0.539132	-0.875292	-0.756954	-0.904882	-0.88085	-1.67174	0.115754	-0.108154	0.00946889	0.102001	0.0758734
TNRC18	-0.661063	-0.447691	-0.643186	-0.705745	-0.815603	-1.2819	NA	NA	NA	NA	NA
P4HA2	0.410053	0.500089	0.625956	0.755575	0.872376	0.922052	-0.107918	0.0597339	-0.0338144	0.129037	0.108843
RRP8	-0.201854	-0.387011	-0.475534	-0.478515	-0.575394	-0.868259	0.150185	0.0557553	-0.0026419	-0.0562306	-0.0179652
SIPA1L1	0.25919	0.144963	0.127072	0.125165	-0.00580432	0.255303	-0.025525	0.0186332	-0.0324986	0.0461343	-0.0395623
B4GALT5	-0.664923	-0.935989	-0.53103	-0.895506	-1.01718	-1.70229	0.751074	0.390357	0.462818	-0.119662	-0.160473
KLF4	-0.4657	-0.232458	-0.180368	-0.597047	-0.901009	-0.72292	0.265956	0.0932354	NA	NA	NA
MED7	-0.0969964	-0.574055	-0.31259	-0.432005	-0.597919	-0.909643	-0.294212	-0.533208	-0.0467216	-0.00403851	-0.181875
PRC1	-0.799453	-1.66043	-1.30666	-1.54328	-1.71504	-3.416	-0.12429	-0.428072	-0.331969	-0.179213	-0.0467785
NUDT21	-0.657007	-0.292416	-0.523235	-0.592608	-0.50629	-1.41624	-0.635284	-0.765503	-0.571011	-0.199156	-0.31062
AKAP8	-0.1409	-0.590301	-0.492774	-0.732929	-0.723377	-1.77033	0.00873645	-0.135183	-0.0134664	0.099526	0.0504688
EDIL3	0.598412	0.76792	0.828695	0.810229	0.839862	1.54701	-0.273169	-0.216827	-0.480553	-0.488404	-0.260117
ATP9B	0.192256	0.327624	0.403798	0.426082	0.435353	1.31025	0.0645142	0.253407	0.0490088	-0.172484	0.171373
SPAG9	-0.00334292	0.0122056	0.783455	-0.248008	-0.75317	-0.108819	1.27196	1.61917	2.09864	1.42221	0.743121
LZTS3	-1.21925	-1.09946	-1.03056	-1.30405	-1.19798	-1.83796	-2.09556	-1.06245	-0.625567	-2.12255	-1.49313
CEP104	0.107741	-0.0196408	0.0962987	-0.175182	-0.0856272	0.409441	0.531173	1.03236	0.426598	0.177647	0.184104
LY75	-0.500658	-0.860343	-0.684695	-0.831719	-0.429644	-0.629289	0.0300559	-0.00128491	-0.0518337	-0.151191	-0.0676853
MAN1A2	0.0961519	0.165963	0.196968	0.0540671	0.310035	0.238692	-0.0177078	0.110586	-0.00610537	0.0377392	-0.0524341
ADCY9	0.0752123	0.287597	0.314645	0.543821	0.478997	1.34707	0.153594	0.318234	0.14903	0.274599	0.248597
MRPS14	-0.178761	-0.168071	-0.146226	-0.186723	-0.292613	-0.425255	0.134212	0.0661484	-0.0722186	-0.0494752	-0.115429
SDC3	-0.114672	0.140955	-0.0505668	-0.0175894	0.342568	1.31615	0.163816	0.638289	0.39313	0.261797	0.232571
EFCAB14	-0.16948	0.0771413	-0.0306538	0.199041	-0.0780298	0.202132	0.312099	0.394653	0.159861	-0.0977048	-0.182135
ROCK2	0.103584	0.0786832	0.0466013	0.0663211	0.0477404	0.273247	-0.0552817	-0.0359013	-0.0176907	0.0297956	0.0320969
NDUFS2	0.0598112	0.000696126	0.0420414	0.0873971	0.030254	0.347063	-0.0419455	0.0345562	-0.0696404	-0.134043	-0.183394
SEMA7A	0.179487	-0.115546	-0.218641	-0.650431	-1.06883	-2.54107	-0.0447342	-0.37088	-0.233792	-0.342789	-0.192797
ENTPD5	0.172292	0.3136	0.370394	0.296159	0.264344	1.21346	-0.081434	0.18381	-0.00840156	-0.0305276	-0.039361
PEX14	0.359814	0.313286	0.347014	0.182928	0.205557	0.591579	0.0191883	0.289463	0.250229	0.130944	0.00566132
ULK1	0.153637	0.32876	0.340607	0.418369	0.297659	0.609305	0.330119	0.46443	0.299325	0.239419	0.228433
SEC22B	0.306086	0.791522	0.520864	0.500956	0.292486	0.856712	-0.204169	-0.176186	-0.166966	-0.219286	-0.257906
ERN1	0.090672	-0.589342	-0.505983	-0.653332	-0.575581	-0.0298102	NA	NA	NA	NA	NA
SRSF10	-0.313295	-0.547784	-0.459949	-0.628664	-0.548923	-0.999445	-0.338863	-0.281005	-0.243935	-0.119851	-0.150996
ERAL1	-0.132558	-0.304898	-0.173451	-0.354454	-0.568951	-0.997243	0.178338	0.014259	0.0985069	-0.0309185	-0.080043
RNASEH2A	-0.669204	-1.30535	-1.08866	-1.36955	-1.40605	-2.45535	0.0979951	-0.407036	-0.208452	-0.0781729	0.0732849
RPP40	0.0807607	-0.0697318	-0.0655451	-0.41831	-0.465583	-0.481823	0.0879335	0.00174037	0.118308	0.183334	0.298221
IDH1	0.0762962	0.272478	0.213558	0.248569	0.102083	0.195054	-0.086613	0.0372261	0.0357626	-0.0765289	0.0146016
DNAJC8	-0.195982	-0.46199	-0.469113	-0.622412	-0.525346	-1.30502	-0.38482	-0.504481	-0.407426	-0.167011	-0.262576
SEC14L2	0.172728	0.0982824	0.26639	0.331644	0.568873	0.572756	0.159429	0.136896	0.151303	0.283089	0.0936824
RGS20	-0.229171	-0.182433	-0.247312	-0.325518	-0.0865285	-0.456392	-0.115384	-0.151455	-0.144892	-0.204176	-0.312056
IPO13	0.324922	0.185531	0.261614	0.290869	0.20436	0.495356	0.0390955	0.015197	-0.00444107	-0.186872	-0.128609
MICAL2	0.0225533	-0.0759901	0.0348981	-0.076639	-0.293536	-0.245619	-0.204051	-0.285169	-0.408992	-0.400603	-0.38568
TMEM63A	0.13718	0.216908	0.422208	0.438246	0.276118	1.64557	0.302419	0.668638	0.49525	0.106578	0.365777
UBXN7	-0.527325	-0.509172	-0.588441	-0.401624	-0.190662	-0.871315	-0.176436	-0.387351	-0.0830799	0.235675	0.0810537
ERLIN2	0.0619797	0.271076	0.225167	0.379242	0.32083	0.666385	-0.269137	-0.140473	-0.246834	-0.232919	-0.296814
PCF11	-0.480342	-0.68459	-0.71433	-0.894063	-0.820289	-1.54619	0.0626294	-0.148523	-0.126489	0.104297	0.242686
GLS	-0.338512	0.231382	0.143526	0.0394747	-0.163656	-0.250088	-0.283296	-0.348349	-0.121689	-0.152399	-0.0466128
FBXO21	0.113844	-0.246776	-0.0290825	0.113948	-0.101094	-0.22609	0.0139873	0.0457789	NA	NA	NA
DUSP14	-0.15668	-0.396621	-0.29191	-0.352785	-0.314416	-0.776182	-0.0538737	-0.199617	-0.160361	-0.317979	-0.0477334
NDUFB4	0.1138	-0.132155	-0.015335	0.173201	0.0686361	0.425428	0.193473	0.354538	0.318782	0.139552	0.0759098
ZRANB2	0.0296413	-0.23495	-0.274495	-0.213283	-0.0533086	-0.847787	0.0958195	0.0157221	-0.0225383	0.153035	0.0813667
SNX4	0.252109	0.333647	0.32129	0.331425	0.218135	0.540647	0.0885992	0.137001	0.0319695	-0.116943	-0.016429
VAPB	0.15732	0.342708	0.2777	0.481239	0.426785	0.748915	0.0197335	-0.306711	-0.221193	-0.091669	-0.131969
IPO7	-0.235213	-0.317124	-0.351574	-0.406446	-0.360639	-0.594131	-0.182542	-0.267197	-0.199356	-0.151017	-0.106531
BMP10	-0.020423	-1.01977	-0.451474	-1.33452	-2.17941	-0.895938	1.20844	0.928477	NA	NA	NA
ZFYVE9	0.162448	0.147089	0.187838	0.375254	0.346097	0.275795	0.398693	0.0260674	0.146689	0.0356337	0.0897632
ADAMTS2	0.258521	0.130383	0.174043	-0.198064	-0.136688	-0.484261	0.200538	0.286585	0.137336	-0.121945	0.239182
NSA2	-0.264216	-0.633011	-0.450297	-0.71341	-0.66454	-1.13844	-0.00685829	-0.0922842	-0.00168923	-0.122533	-0.167645
OXSR1	-0.0785593	-0.0546913	-0.00221986	-0.0787032	-0.111395	0.087131	-0.028747	-0.0515227	-0.13008	-0.114904	-0.0866914
AP2A1	0.186998	0.241159	0.266257	0.307161	0.269444	0.607995	-0.124091	-0.00210703	-0.0874096	-0.120896	-0.0919656
TOP3B	-0.150047	-0.386252	-0.400562	-0.541811	-0.497748	-0.946633	0.0409891	-0.122204	-0.0526402	0.142138	-0.00704776
GSR	-0.0593845	0.0700633	0.0807729	0.0928336	0.156467	1.08482	-0.158303	-0.0115134	-0.151422	-0.216834	-0.204313
F8	0.580731	0.693407	0.458034	0.54451	0.559633	0.669217	-0.390011	-0.29492	-0.0511202	-0.135367	-0.166966
COL3A1	0.250068	0.336113	0.452496	0.300167	0.596811	-0.235051	-0.189788	0.0391957	-0.0106216	0.495496	-0.0426787
OAT	0.008875	-0.109811	-0.0161145	-0.10243	-0.224896	-0.0615567	-0.0406001	-0.127921	-0.0874975	-0.199854	-0.0571734
SERPINB2	0.00102864	0.175225	0.313116	0.340366	-0.115213	0.575882	-0.850158	-1.21371	-1.62424	-1.66978	-1.2775
SSB	-0.14675	-0.253819	-0.254004	-0.272624	-0.0107999	-0.752015	-0.0408502	-0.0782033	0.00295668	0.103446	0.0917624
CENPB	-0.84935	-1.15885	-1.20744	-1.40314	-1.73714	-2.52141	0.264568	-0.0446923	0.0997513	-0.0384124	-0.101725
CAPN1	0.192042	0.456749	0.361227	0.347193	0.340249	0.448442	-0.315361	-0.302656	-0.349562	-0.321172	-0.285166
ADRB2	0.00984027	-0.0916703	-0.0802118	-0.24548	-0.525995	-0.350644	0.11046	-0.0579537	-0.0844691	-0.228575	0.0355109
HNRNPC	-0.369923	-0.832594	-0.735854	-0.694604	-0.805877	-1.22364	0.388889	0.0716642	0.32687	0.392513	0.240037
TPM2	0.592277	1.25193	0.799456	1.37715	1.88375	1.45276	0.0885479	-0.288441	0.0940843	0.554529	0.159647
SLC3A2	-0.436627	-0.537724	-0.567778	-0.880009	-0.60099	-0.638074	-0.0231555	-0.0314149	-0.145973	-0.455833	-0.288848
NR3C2	-0.0990421	-0.294413	-0.268336	0.156261	0.1092	-0.213291	0.567041	0.891321	NA	NA	NA
PFKM	0.0126089	0.11398	0.0857361	-0.00338707	-0.0747793	0.267567	-0.0425296	0.0435027	-0.0304193	-0.144519	-0.0556813
SRPRA	-0.0923499	-0.181309	-0.0814865	-0.088087	-0.0204973	-0.181763	-0.232255	-0.291342	-0.249185	-0.10826	-0.206454
PLEK	NA	NA	NA	-0.545223	-1.21281	0.00989277	0.527056	0.668703	0.654429	NA	NA
FGF2	0.212364	-0.167439	0.0208349	-0.0940777	0.0897629	0.305481	-0.236961	-0.301309	-0.447565	-0.415313	-0.303716
HMOX1	0.103142	0.309817	0.255879	0.0153151	-1.13049	-0.50869	0.0321231	0.373414	0.166964	-0.0406348	0.01675
DLD	0.117552	0.313216	0.40345	0.39734	0.257774	1.12166	0.0432766	0.144173	0.0855127	-0.0179896	0.0245765
C4A	0.0463569	0.258214	0.101584	-0.0668998	-0.511233	0.0975182	0.524847	0.715937	0.788979	0.404619	0.500784
SLFN14	-0.048605	-0.298346	-0.243332	-0.436342	-0.218143	-0.659507	-0.122553	0.102092	-0.0927386	-0.168093	-0.10373
PLA2G4B	0.255955	-0.0727438	0.225342	0.185358	0.454385	1.39759	0.0584176	0.309574	0.425727	0.356614	0.383929
TROVE2	0.120607	0.187098	0.184477	0.146938	0.124007	0.108234	0.175484	0.232483	0.0919147	0.283309	0.236088
COX5B	-0.0124804	0.51551	0.133217	0.393258	0.320055	0.419812	0.0720239	0.222673	0.237364	0.127905	-0.0226528
ACP2	0.215232	0.54217	0.5945	0.658497	0.488946	2.16231	0.0951555	0.143244	0.0254216	-0.0161691	0.0873482
SLC2A3	0.132656	0.305093	0.547921	0.303839	0.102479	0.0114775	0.327377	-0.00885688	-0.297704	-0.643122	-0.433003
DMD	0.482579	0.436135	0.48563	0.456504	0.489952	0.799873	0.284278	0.0707692	0.157099	0.244494	0.424188
ODC1	-0.291776	-1.28992	-0.90529	-1.41876	-1.49852	-2.57122	-0.0346243	-0.428514	0.297034	-0.208948	0.290652
COL11A1	1.08329	1.49429	1.36382	1.4254	-0.106418	0.196579	0.119161	0.49885	0.469666	0.0759666	0.111413
COL6A1	-0.125832	-0.367459	-0.105923	-0.0789974	-0.125731	-0.756744	0.242099	0.419037	0.322167	0.75194	0.438731
LAMP2	0.210892	0.482488	0.622564	0.649106	0.309568	1.66385	0.299327	0.334838	0.0856116	-0.147319	0.000355055
GYS1	0.261409	0.371531	0.394175	0.395136	0.375318	0.839174	0.156558	0.230721	0.179309	0.070509	0.193258
POU2F1	-0.42827	-0.495499	-0.92171	-0.483334	-0.510243	-1.08439	-0.11759	-0.384668	-0.366329	NA	NA
UCHL3	0.123997	0.243882	0.216511	0.278822	0.111711	0.572632	-0.258706	-0.286762	-0.179084	-0.271732	-0.259701
SLC25A16	-0.0383191	-0.0761745	-0.0259611	-0.265129	-0.325938	-0.0272919	-0.250613	-0.317785	-0.545107	-0.269489	-0.30851
RHOQ	0.256121	0.929005	0.898317	0.726087	0.866542	1.47785	0.0160329	0.358921	0.00932731	-0.0978555	-0.145252
HOXB6	-0.138643	-0.444097	-0.447584	-0.265371	-0.321722	-0.924555	0.820523	0.405195	0.468641	0.436412	0.285373
IGFBP2	-0.43537	-0.423179	-0.64323	-0.967012	-0.977452	-0.640508	0.564301	0.538836	0.343518	-0.491673	-0.0478932
ERCC2	-0.182304	-0.250747	-0.110308	-0.152108	-0.266928	-0.452756	0.168433	-0.071192	0.182738	0.173618	0.237063
TNFRSF1A	-0.0930511	-0.0711309	-0.0204905	-0.273063	-0.396964	-0.230711	0.596544	0.557887	0.323105	0.118885	0.240678
SLC9A1	0.237398	0.0991258	0.292697	0.246557	0.0913638	0.883953	0.461339	0.539693	0.304522	-0.0109625	-0.0092313
[truncated: 6,447 more rows]

## Sheet: differental_analysis
Gene	Protein	PDL_Pval_Time	PDL_Pval_Time_LlocalFDR_Time	hTERT_Pval_Time	PDL_Pval_Time_LlocalFDR_Time
PIGBOS1	sp|A0A0B4J2F0|PIOS1-HUMAN	0.675489	0.723677	0.0489762	0.247186
TMEM120B	sp|A0PK00|T120B-HUMAN	6.83987e-06	2.29681e-05	0.0521691	0.255606
DCTN6	sp|O00399|DCTN6-HUMAN	3.9918e-06	1.41898e-05	0.296915	0.620979
IDE	sp|P14735|IDE-HUMAN	2.22706e-10	2.85218e-09	0.0294987	0.187333
MMP9	sp|P14780|MMP9-HUMAN	3.84828e-05	0.000111238	0.0664226	0.291937
COX6B1	sp|P14854|CX6B1-HUMAN	8.27707e-05	0.000222192	0.580413	0.834274
POU2F1	sp|P14859-6|PO2F1-HUMAN	0.404694	0.469926	0.427864	0.73297
HNRNPL	sp|P14866|HNRPL-HUMAN	9.94744e-10	9.72697e-09	0.629712	0.858542
DARS	sp|P14868|SYDC-HUMAN	0.72829	0.771194	0.00154995	0.0317577
UQCRB	sp|P14927|QCR7-HUMAN	0.000828668	0.001815	0.855025	0.954227
ETS2	sp|P15036|ETS2-HUMAN	0.236554	0.295165	0.443521	0.747524
BRAF	sp|P15056|BRAF-HUMAN	0.00454449	0.00852763	0.0670014	0.292667
FABP4	sp|P15090|FABP4-HUMAN	0.883405	0.904896	0.119623	0.393242
SLC33A1	sp|O00400|ACATN-HUMAN	0.000457688	0.00105324	0.287291	0.61401
ANPEP	sp|P15144|AMPN-HUMAN	2.51706e-11	4.64196e-10	0.230243	0.552307
PVR	sp|P15151|PVR-HUMAN	8.5461e-10	8.6788e-09	0.820534	0.944216
GSPT1	sp|P15170-3|ERF3A-HUMAN	0.000143769	0.000367431	0.590198	0.839629
B4GALT1	sp|P15291|B4GT1-HUMAN	0.58286	0.638839	0.000297417	0.0100814
EZR	sp|P15311|EZRI-HUMAN	0.524609	0.585077	0.391626	0.705005
ATF2	sp|P15336|ATF2-HUMAN	0.016376	0.0272226	0.144483	0.433651
UCHL3	sp|P15374|UCHL3-HUMAN	0.00138577	0.00290348	0.0559004	0.265981
FOSL2	sp|P15408|FOSL2-HUMAN	1.46188e-05	4.59755e-05	0.260121	0.587136
CD46	sp|P15529-2|MCP-HUMAN	0.0223091	0.0359762	0.36915	0.68683
CD46	sp|P15529|MCP-HUMAN	0.0818305	0.11525	0.0941322	0.350213
WASL	sp|O00401|WASL-HUMAN	0.0138124	0.0234298	0.84011	0.950051
NME1	sp|P15531-2|NDKA-HUMAN	0.694412	0.740945	0.13421	0.417809
NQO1	sp|P15559|NQO1-HUMAN	3.83908e-05	0.000111007	0.637173	0.862793
GNS	sp|P15586|GNS-HUMAN	6.5858e-10	7.02867e-09	0.822194	0.94453
HIVEP1	sp|P15822|ZEP1-HUMAN	0.0996475	0.137265	0.711018	0.899109
RPS2	sp|P15880|RS2-HUMAN	3.02571e-06	1.10484e-05	0.11306	0.380344
CHN1	sp|P15882|CHIN-HUMAN	0.00133214	0.00280194	0.00367297	0.0547148
ST6GAL1	sp|P15907|SIAT1-HUMAN	0.237346	0.295873	0.935075	0.981011
RPA2	sp|P15927-3|RFA2-HUMAN	4.19884e-07	1.85695e-06	0.0120016	0.111559
COX7C	sp|P15954|COX7C-HUMAN	0.547006	0.605952	0.0668978	0.292492
TIMP2	sp|P16035|TIMP2-HUMAN	0.68615	0.733479	0.596216	0.84189
IPO5	sp|O00410-3|IPO5-HUMAN	4.93606e-08	2.79751e-07	0.0717316	0.30175
CD44	sp|P16070|CD44-HUMAN	1.58107e-09	1.455e-08	0.819182	0.944216
NQO2	sp|P16083|NQO2-HUMAN	7.15298e-05	0.000195083	0.832545	0.947575
H2AFX	sp|P16104|H2AX-HUMAN	0.0274334	0.0433156	0.303502	0.628051
CBR1	sp|P16152|CBR1-HUMAN	4.27184e-09	3.36098e-08	0.214424	0.535538
ANK1	sp|P16157-14|ANK1-HUMAN	0.0458597	0.0684369	0.494568	0.782641
CREB1	sp|P16220|CREB1-HUMAN	0.000463153	0.00106449	0.156598	0.453657
PDGFRA	sp|P16234|PGFRA-HUMAN	1.51124e-06	5.91725e-06	0.778879	0.928373
SLC25A16	sp|P16260|GDC-HUMAN	0.124627	0.167227	0.0112395	0.106406
PPP3CB	sp|P16298-4|PP2BB-HUMAN	0.0841721	0.118262	0.264846	0.591318
GCFC2	sp|P16383|GCFC2-HUMAN	0.00040821	0.000950051	0.32094	0.644988
POLRMT	sp|O00411|RPOM-HUMAN	0.000285606	0.000688336	0.922367	0.977098
HIST1H1B	sp|P16401|H15-HUMAN	3.48185e-07	1.56927e-06	0.391946	0.705005
HIST1H1D	sp|P16402|H13-HUMAN	2.89389e-08	1.74041e-07	0.867606	0.959026
HIST1H1C	sp|P16403|H12-HUMAN	2.55833e-07	1.19931e-06	0.123667	0.400961
FER	sp|P16591|FER-HUMAN	0.0807147	0.113785	0.940128	0.983017
CPE	sp|P16870|CBPE-HUMAN	0.560251	0.617582	0.00112931	0.0252753
IL7R	sp|P16871|IL7RA-HUMAN	0.00206588	0.00417293	0.812889	0.943204
FAH	sp|P16930|FAAA-HUMAN	1.52909e-09	1.41706e-08	0.771432	0.925757
STMN1	sp|P16949|STMN1-HUMAN	0.819868	0.84982	0.0155698	0.129008
YBX3	sp|P16989|YBOX3-HUMAN	0.969589	0.974769	0.403706	0.71382
ZNF22	sp|P17026|ZNF22-HUMAN	7.93684e-09	5.7221e-08	0.107457	0.373471
EEF2K	sp|O00418|EF2K-HUMAN	0.176086	0.227376	0.000832475	0.0203075
ZKSCAN1	sp|P17029|ZKSC1-HUMAN	0.144556	0.190858	0.542028	0.813337
ZNF28	sp|P17035|ZNF28-HUMAN	0.453738	0.517575	0.13364	0.41688
RHOQ	sp|P17081|RHOQ-HUMAN	1.62795e-07	8.04898e-07	0.376269	0.692574
HMGA1	sp|P17096|HMGA1-HUMAN	0.277569	0.339047	0.497955	0.784232
TMEM11	sp|P17152|TMM11-HUMAN	0.187379	0.240042	0.0961717	0.354012
IFNAR1	sp|P17181|INAR1-HUMAN	0.197836	0.251411	0.308841	0.63299
ITGA2	sp|P17301|ITA2-HUMAN	0.181543	0.233506	0.0749599	0.308765
UBTF	sp|P17480|UBF1-HUMAN	2.33416e-11	4.39251e-10	0.678183	0.882453
HOXB6	sp|P17509|HXB6-HUMAN	0.0135672	0.0230478	0.840966	0.950051
JUND	sp|P17535|JUND-HUMAN	9.64376e-08	5.09016e-07	0.506338	0.789206
EML1	sp|O00423-3|EMAL1-HUMAN	1.92797e-05	5.9141e-05	0.547968	0.816418
ATF7	sp|P17544|ATF7-HUMAN	3.19173e-10	3.84215e-09	0.639925	0.864361
NDUFB7	sp|P17568|NDUB7-HUMAN	0.243262	0.30243	0.704334	0.89564
CEBPB	sp|P17676|CEBPB-HUMAN	0.000577888	0.00130254	0.00456066	0.0617531
GAP43	sp|P17677-2|NEUM-HUMAN	0.213764	0.269205	0.475528	0.769136
PTPN2	sp|P17706|PTN2-HUMAN	1.52716e-05	4.77841e-05	0.453578	0.753454
CTPS1	sp|P17812|PYRG1-HUMAN	0.786235	0.822049	0.239596	0.563313
ENG	sp|P17813|EGLN-HUMAN	0.000909371	0.00197394	0.108087	0.374014
PFKL	sp|P17858-2|PFKAL-HUMAN	8.01845e-09	5.7674e-08	0.70843	0.897806
GM2A	sp|P17900|SAP3-HUMAN	3.07533e-06	1.12174e-05	0.296437	0.620494
IGFBP3	sp|P17936-2|IBP3-HUMAN	0.568917	0.625639	0.851989	0.952843
IGF2BP3	sp|O00425|IF2B3-HUMAN	0.530098	0.589985	0.658857	0.873797
FLT1	sp|P17948|VGFR1-HUMAN	0.115621	0.156693	0.0557332	0.265792
PSMC3	sp|P17980|PRS6A-HUMAN	0.942346	0.9532	0.00914818	0.0942532
TCP1	sp|P17987|TCPA-HUMAN	0.0882207	0.123274	0.168024	0.471202
IGFBP2	sp|P18065|IBP2-HUMAN	0.00929799	0.0163589	0.0396236	0.219178
ERCC2	sp|P18074|ERCC2-HUMAN	0.00021428	0.000527605	0.0199089	0.148528
RPL35A	sp|P18077|RL35A-HUMAN	0.814825	0.845354	0.354597	0.675984
ITGB5	sp|P18084|ITB5-HUMAN	6.90113e-05	0.000188885	0.490014	0.77877
ARF4	sp|P18085|ARF4-HUMAN	0.000102067	0.000268518	0.121755	0.397249
SON	sp|P18583-9|SON-HUMAN	1.55586e-07	7.7549e-07	0.062913	0.282572
NELFE	sp|P18615-3|NELFE-HUMAN	4.21846e-05	0.000120915	0.414192	0.722251
DNM1L	sp|O00429-2|DNM1L-HUMAN	0.00119109	0.00253182	0.399428	0.709951
SDC1	sp|P18827|SDC1-HUMAN	7.33859e-09	5.36206e-08	0.707627	0.897405
ATF6	sp|P18850|ATF6A-HUMAN	0.0015266	0.00317617	0.0159163	0.130806
LIG1	sp|P18858|DNLI1-HUMAN	1.08562e-12	4.20673e-11	0.281918	0.609792
ATP5J	sp|P18859-2|ATP5J-HUMAN	0.0939291	0.130302	0.534182	0.808458
PAM	sp|P19021-5|AMD-HUMAN	0.0234075	0.0376029	0.923005	0.977098
CDH2	sp|P19022|CADH2-HUMAN	5.57679e-10	6.16589e-09	0.061497	0.279108
CD58	sp|P19256|LFA3-HUMAN	0.058344	0.0850847	0.181762	0.492224
POLR2C	sp|P19387|RPB3-HUMAN	1.07394e-06	4.32814e-06	0.689759	0.888053
TNFRSF1A	sp|P19438|TNR1A-HUMAN	0.0154784	0.0259409	0.840246	0.950051
GGT1	sp|P19440|GGT1-HUMAN	1.70244e-10	2.25873e-09	0.67687	0.882024
RTCA	sp|O00442|RTCA-HUMAN	0.000301066	0.000721074	0.768701	0.923904
TRIM21	sp|P19474|RO52-HUMAN	0.83126	0.860179	0.0691943	0.296941
EIF2AK2	sp|P19525|E2AK2-HUMAN	4.41889e-05	0.000126229	0.0899388	0.341102
TFE3	sp|P19532|TFE3-HUMAN	0.986949	0.989417	0.050549	0.251273
SRM	sp|P19623|SPEE-HUMAN	0.00444857	0.00836637	0.0308051	0.19154
SLC9A1	sp|P19634|SL9A1-HUMAN	0.0079849	0.0142941	0.20681	0.527478
CSNK2A2	sp|P19784|CSK22-HUMAN	0.428896	0.493863	0.314245	0.639093
ITIH1	sp|P19827|ITIH1-HUMAN	0.0855853	0.119991	0.367109	0.685346
NFKB1	sp|P19838-2|NFKB1-HUMAN	0.15573	0.20393	0.257499	0.584105
FST	sp|P19883|FST-HUMAN	0.0299945	0.0469416	0.0964111	0.354192
ATP2B1	sp|P20020|AT2B1-HUMAN	0.342585	0.407873	0.0270915	0.178182
ARHGAP10	sp|A1A4S6|RHG10-HUMAN	3.33449e-06	1.2072e-05	0.656354	0.873466
PIK3C2A	sp|O00443|P3C2A-HUMAN	0.282615	0.344207	0.729663	0.906524
ANXA7	sp|P20073|ANXA7-HUMAN	0.00469947	0.00878626	0.460417	0.758523
CCNA2	sp|P20248|CCNA2-HUMAN	0.0713942	0.10205	0.814671	0.943885
BTF3	sp|P20290-2|BTF3-HUMAN	0.954211	0.962351	0.189393	0.502125
BTF3	sp|P20290|BTF3-HUMAN	8.16524e-10	8.36575e-09	0.336447	0.658971
TNFRSF1B	sp|P20333|TNR1B-HUMAN	0.595755	0.651038	0.557239	0.821828
RAB5A	sp|P20339|RAB5A-HUMAN	0.00414185	0.00784713	0.0387491	0.216417
RAB6A	sp|P20340-2|RAB6A-HUMAN	9.15948e-06	3.00354e-05	0.508692	0.791005
RAB6A	sp|P20340|RAB6A-HUMAN	0.0340567	0.0525321	0.061304	0.278709
MSH3	sp|P20585|MSH3-HUMAN	9.90598e-12	2.2893e-10	0.128105	0.407731
NPR2	sp|P20594|ANPRB-HUMAN	4.00075e-05	0.00011514	0.161636	0.461863
IFRD1	sp|O00458|IFRD1-HUMAN	5.71067e-11	9.32457e-10	0.866375	0.958354
M6PR	sp|P20645|MPRD-HUMAN	0.257104	0.31682	0.795164	0.934396
LMNB1	sp|P20700|LMNB1-HUMAN	6.34855e-10	6.86283e-09	0.658295	0.873797
HOXA5	sp|P20719|HXA5-HUMAN	0.371047	0.436963	0.318569	0.643208
CAST	sp|P20810-6|ICAL-HUMAN	0.134557	0.179092	0.503674	0.786817
IMPDH1	sp|P20839-6|IMDH1-HUMAN	3.65855e-10	4.29751e-09	0.87371	0.960462
AGA	sp|P20933|ASPG-HUMAN	0.000179899	0.000448944	0.979873	0.993994
RASA1	sp|P20936|RASA1-HUMAN	1.39967e-05	4.41847e-05	0.197859	0.515092
PTMS	sp|P20962|PTMS-HUMAN	0.50141	0.564323	0.926014	0.977536
GSTM3	sp|P21266|GSTM3-HUMAN	1.40706e-13	1.00977e-11	0.054901	0.26353
ATP6V1B2	sp|P21281|VATB2-HUMAN	5.72863e-06	1.95861e-05	0.271435	0.598638
GOLIM4	sp|O00461|GOLI4-HUMAN	0.335598	0.400463	0.00315173	0.0503675
CSRP1	sp|P21291|CSRP1-HUMAN	0.00664393	0.0120408	0.390077	0.703826
FLNA	sp|P21333|FLNA-HUMAN	3.08696e-05	9.0855e-05	0.0508548	0.252114
NF1	sp|P21359|NF1-HUMAN	1.82879e-05	5.64365e-05	0.741353	0.913264
ACO1	sp|P21399|ACOC-HUMAN	0.00274913	0.00539585	0.0219304	0.15676
ABCB4	sp|P21439|MDR3-HUMAN	0.00122141	0.0025903	0.509549	0.791669
TAF1	sp|P21675-4|TAF1-HUMAN	0.0116311	0.0200355	0.597482	0.842293
SDHB	sp|P21912|SDHB-HUMAN	2.36398e-07	1.12189e-06	0.876124	0.960954
CD9	sp|P21926|CD9-HUMAN	2.4059e-06	8.99991e-06	0.881614	0.963636
COMT	sp|P21964|COMT-HUMAN	1.0166e-12	4.04117e-11	0.317679	0.642254
TGM2	sp|P21980|TGM2-HUMAN	1.49163e-08	9.79654e-08	0.904953	0.970691
MANBA	sp|O00462|MANBA-HUMAN	1.39294e-07	7.04183e-07	0.276741	0.605097
MUT	sp|P22033|MUTA-HUMAN	0.000397902	0.00092958	0.49653	0.78388
OSBP	sp|P22059|OSBP1-HUMAN	1.45076e-08	9.56213e-08	0.587898	0.839258
FBL	sp|P22087|FBRL-HUMAN	3.66322e-07	1.64293e-06	0.183313	0.494538
RPS4Y1	sp|P22090|RS4Y1-HUMAN	6.0638e-05	0.000168113	0.178611	0.487703
PAICS	sp|P22234-2|PUR6-HUMAN	0.000104574	0.000274489	0.672812	0.879857
SCP2	sp|P22307|NLTP-HUMAN	7.01348e-06	2.35168e-05	0.38729	0.70136
UBA1	sp|P22314|UBA1-HUMAN	0.000233939	0.000571583	0.281897	0.609792
ENPP1	sp|P22413|ENPP1-HUMAN	0.000155479	0.000394951	0.648592	0.869721
FDXR	sp|P22570-7|ADRO-HUMAN	5.95097e-09	4.45767e-08	0.118606	0.391574
HNRNPA2B1	sp|P22626|ROA2-HUMAN	2.79715e-07	1.29806e-06	0.187363	0.499327
AGRN	sp|O00468-3|AGRIN-HUMAN	0.000245261	0.000597977	0.000124155	0.00561192
RFX1	sp|P22670|RFX1-HUMAN	8.28308e-07	3.42503e-06	0.499179	0.784615
CBL	sp|P22681|CBL-HUMAN	0.0996299	0.137265	0.0165899	0.133667
IGFBP4	sp|P22692|IBP4-HUMAN	9.91334e-16	2.53919e-13	0.486474	0.776758
PRKACB	sp|P22694-2|KAPCB-HUMAN	0.151031	0.198498	0.923606	0.977098
UQCRC2	sp|P22695|QCR2-HUMAN	0.00838392	0.0149301	0.915437	0.974178
FECH	sp|P22830-2|HEMH-HUMAN	0.915163	0.931015	0.00229783	0.0412224
XPA	sp|P23025|XPA-HUMAN	0.0304096	0.0475266	0.26654	0.593376
FBLN1	sp|P23142|FBLN1-HUMAN	0.362295	0.427968	0.000667959	0.01735
TCEA1	sp|P23193|TCEA1-HUMAN	5.93304e-07	2.52812e-06	0.223436	0.544477
PTGS1	sp|P23219-6|PGH1-HUMAN	1.2071e-12	4.59944e-11	0.263706	0.590489
PLOD2	sp|O00469-2|PLOD2-HUMAN	1.10079e-11	2.5001e-10	0.358584	0.679876
ITGA6	sp|P23229-6|ITA6-HUMAN	8.01691e-06	2.65341e-05	0.0106028	0.102388
SFPQ	sp|P23246|SFPQ-HUMAN	5.13446e-11	8.5306e-10	0.687368	0.886545
TUBG1	sp|P23258|TBG1-HUMAN	0.000163109	0.000411725	0.459915	0.758383
PPIB	sp|P23284|PPIB-HUMAN	5.26169e-06	1.81376e-05	0.848042	0.951837
ME2	sp|P23368|MAOM-HUMAN	3.25089e-05	9.52843e-05	0.107569	0.373558
RPS3	sp|P23396|RS3-HUMAN	5.61066e-06	1.92041e-05	0.0459036	0.236937
GCSH	sp|P23434|GCSH-HUMAN	0.440278	0.504825	0.127317	0.406897
RPS6KB1	sp|P23443|KS6B1-HUMAN	0.000451149	0.00104001	0.298734	0.623078
JAK1	sp|P23458|JAK1-HUMAN	4.76145e-06	1.65868e-05	0.410143	0.719174
PTPRG	sp|P23470|PTPRG-HUMAN	0.00153998	0.0032004	0.745463	0.914717
MEIS1	sp|O00470-2|MEIS1-HUMAN	0.00032471	0.000771886	0.477493	0.770626
SP100	sp|P23497-4|SP100-HUMAN	0.400662	0.466007	0.796291	0.934887
NFYA	sp|P23511|NFYA-HUMAN	0.000463675	0.00106516	0.565834	0.826871
AHCY	sp|P23526|SAHH-HUMAN	4.43399e-11	7.50198e-10	0.00293596	0.0477764
BDNF	sp|P23560-4|BDNF-HUMAN	0.968131	0.973417	0.826415	0.945104
F8A1	sp|P23610|F8I2-HUMAN	0.0528542	0.077842	0.681561	0.883796
ATP2B4	sp|P23634-2|AT2B4-HUMAN	4.00087e-06	1.42166e-05	0.913675	0.973708
ATP2B4	sp|P23634|AT2B4-HUMAN	7.88564e-05	0.000212924	0.193166	0.507748
ITPKA	sp|P23677|IP3KA-HUMAN	0.0163561	0.0272011	0.76833	0.923904
DGKA	sp|P23743|DGKA-HUMAN	1.3214e-16	5.07694e-14	0.459389	0.758194
CPT2	sp|P23786|CPT2-HUMAN	8.77589e-11	1.32011e-09	0.63899	0.863942
EXOC5	sp|O00471|EXOC5-HUMAN	9.6479e-06	3.14136e-05	0.498797	0.784347
RRM1	sp|P23921|RIR1-HUMAN	9.27234e-13	3.85136e-11	0.162221	0.462826
LAMA2	sp|P24043|LAMA2-HUMAN	0.000293736	0.000705348	0.310482	0.63456
COX7A1	sp|P24310|CX7A1-HUMAN	0.842651	0.869721	0.713733	0.900137
CCND1	sp|P24385|CCND1-HUMAN	0.0809161	0.114034	0.658837	0.873797
CHM	sp|P24386|RAE1-HUMAN	0.0493985	0.073205	0.295821	0.620494
KDELR1	sp|P24390|ERD21-HUMAN	0.000200367	0.000496396	0.225767	0.54712
NR2F2	sp|P24468|COT2-HUMAN	7.22534e-05	0.000196824	0.376329	0.692574
IGFBP6	sp|P24592|IBP6-HUMAN	0.0546718	0.0803008	0.187965	0.500208
IGFBP5	sp|P24593|IBP5-HUMAN	6.29292e-11	1.01092e-09	9.575e-05	0.00477249
ACP1	sp|P24666-2|PPAC-HUMAN	0.00436096	0.00821331	0.626025	0.857243
ELL2	sp|O00472|ELL2-HUMAN	0.316455	0.380101	0.826313	0.945104
ACAT1	sp|P24752|THIL-HUMAN	5.60593e-08	3.13101e-07	0.503032	0.786817
TNC	sp|P24821-4|TENA-HUMAN	0.000406245	0.000946195	0.385456	0.700491
POLR2A	sp|P24928|RPB1-HUMAN	8.55993e-12	2.04485e-10	0.855193	0.954227
GRK2	sp|P25098|ARBK1-HUMAN	0.0116091	0.0200014	0.0516026	0.25391
F2R	sp|P25116|PAR1-HUMAN	0.25222	0.311927	0.551006	0.818174
MCM3	sp|P25205-2|MCM3-HUMAN	4.97684e-12	1.34579e-10	0.466001	0.762042
NFYB	sp|P25208|NFYB-HUMAN	9.74801e-08	5.13343e-07	0.957593	0.988494
MPST	sp|P25325-2|THTM-HUMAN	9.25451e-07	3.78765e-06	0.643003	0.8659
LAMA1	sp|P25391|LAMA1-HUMAN	0.156989	0.205362	0.0356736	0.207057
RPS12	sp|P25398|RS12-HUMAN	9.81831e-05	0.000259189	0.148907	0.442214
NDUFA4	sp|O00483|NDUA4-HUMAN	0.229892	0.287552	0.338786	0.660218
YY1	sp|P25490|TYY1-HUMAN	1.86138e-07	9.06699e-07	0.902591	0.970475
DNAJB2	sp|P25686|DNJB2-HUMAN	8.40039e-08	4.47686e-07	0.105228	0.36908
CTSS	sp|P25774|CATS-HUMAN	0.0036017	0.00691757	0.194705	0.509906
PSMA1	sp|P25786-2|PSA1-HUMAN	0.0430913	0.0648515	0.763015	0.921223
PSMA4	sp|P25789|PSA4-HUMAN	0.00275243	0.00540003	0.708902	0.898034
ITGA3	sp|P26006-1|ITA3-HUMAN	2.80345e-07	1.29998e-06	0.00354238	0.0536782
PTX3	sp|P26022|PTX3-HUMAN	0.0180256	0.0296758	0.422012	0.727543
DDX6	sp|P26196|DDX6-HUMAN	2.85231e-08	1.72128e-07	0.666783	0.87659
CTNNA2	sp|P26232|CTNA2-HUMAN	0.231969	0.289953	0.440701	0.745527
DNMT1	sp|P26358-2|DNMT1-HUMAN	4.5939e-13	2.32749e-11	0.785253	0.931175
MEX3A	sp|A1L020|MEX3A-HUMAN	0.000665615	0.00148431	0.349861	0.671328
PSMD14	sp|O00487|PSDE-HUMAN	0.466394	0.529437	0.646584	0.868479
U2AF2	sp|P26368|U2AF2-HUMAN	6.36785e-10	6.86759e-09	0.367071	0.685346
RPL13	sp|P26373|RL13-HUMAN	0.0342428	0.0527839	0.186305	0.498093
CHML	sp|P26374|RAE2-HUMAN	0.0041077	0.0077892	0.9405	0.983017
S100A4	sp|P26447|S10A4-HUMAN	1.95371e-05	5.98907e-05	0.00266023	0.045426
HMGB2	sp|P26583|HMGB2-HUMAN	2.50447e-10	3.14628e-09	0.662348	0.87485
PTBP1	sp|P26599-3|PTBP1-HUMAN	0.097662	0.134878	0.704591	0.89564
TARS	sp|P26639|SYTC-HUMAN	0.0257061	0.0408965	0.321417	0.645424
EEF1G	sp|P26641-2|EF1G-HUMAN	0.0136948	0.0232431	0.0264965	0.176098
FKBP2	sp|P26885|FKBP2-HUMAN	3.459e-07	1.5612e-06	0.887633	0.965994
ACVR2A	sp|P27037|AVR2A-HUMAN	0.0578873	0.0844854	0.676869	0.882024
ZNF593	sp|O00488|ZN593-HUMAN	0.225715	0.282788	0.545924	0.814689
STOM	sp|P27105|STOM-HUMAN	2.31588e-09	2.0127e-08	0.0109832	0.104732
AK4	sp|P27144|KAD4-HUMAN	2.6785e-13	1.57315e-11	0.215689	0.537073
YWHAQ	sp|P27348|1433T-HUMAN	0.84431	0.870945	0.0463741	0.238618
MAPK3	sp|P27361|MK03-HUMAN	9.40979e-09	6.59329e-08	0.0472015	0.241133
ATP6V0C	sp|P27449|VATL-HUMAN	3.96169e-07	1.76137e-06	0.708629	0.897934
G0S2	sp|P27469|G0S2-HUMAN	0.882259	0.904049	0.760647	0.921048
DPP4	sp|P27487|DPP4-HUMAN	8.51759e-10	8.65939e-09	0.56938	0.828494
ARNT	sp|P27540|ARNT-HUMAN	0.323201	0.387264	0.0067751	0.0782165
RPA1	sp|P27694|RFA1-HUMAN	9.33788e-12	2.19096e-10	0.469012	0.764009
CD82	sp|P27701|CD82-HUMAN	1.85684e-11	3.68213e-10	0.00681143	0.0785103
STK25	sp|O00506|STK25-HUMAN	1.72256e-05	5.33907e-05	0.923039	0.977098
CAD	sp|P27708|PYR1-HUMAN	6.49127e-08	3.56498e-07	0.906296	0.971069
PDE4A	sp|P27815|PDE4A-HUMAN	0.00215563	0.00432957	0.00455135	0.0617176
MAP4	sp|P27816-5|MAP4-HUMAN	3.66621e-06	1.31307e-05	0.279639	0.606788
CANX	sp|P27824-2|CALX-HUMAN	0.000329275	0.000782335	0.892545	0.966737
PIK3R1	sp|P27986-4|P85A-HUMAN	9.11349e-05	0.000242317	0.58391	0.836784
ITPKB	sp|P27987|IP3KB-HUMAN	0.000673754	0.00150101	0.294093	0.619264
PSMB8	sp|P28062|PSB8-HUMAN	3.55223e-06	1.27551e-05	0.127394	0.406897
PSMB9	sp|P28065|PSB9-HUMAN	0.0349932	0.0537876	0.00299948	0.0483534
PSMA5	sp|P28066|PSA5-HUMAN	0.00245014	0.00485551	0.0888383	0.338783
PSMB5	sp|P28074|PSB5-HUMAN	0.0131886	0.0224501	0.00320878	0.0507609
KRIT1	sp|O00522|KRIT1-HUMAN	0.554625	0.612772	0.930294	0.979044
GSTM2	sp|P28161|GSTM2-HUMAN	3.62448e-08	2.12604e-07	0.102495	0.364763
TMOD1	sp|P28289|TMOD1-HUMAN	0.00223626	0.00447107	0.376368	0.692574
SSFA2	sp|P28290|SSFA2-HUMAN	0.00298747	0.00582522	0.0799554	0.31875
NDUFS1	sp|P28331-2|NDUS1-HUMAN	5.85457e-09	4.39975e-08	0.000356445	0.0112948
TEAD1	sp|P28347-2|TEAD1-HUMAN	2.28999e-05	6.92101e-05	0.834189	0.947671
RXRB	sp|P28702-3|RXRB-HUMAN	4.63679e-08	2.64251e-07	0.0369452	0.210942
RBL1	sp|P28749|RBL1-HUMAN	0.00018245	0.00045494	0.115845	0.38647
GRN	sp|P28799|GRN-HUMAN	0.00239513	0.00476185	0.545721	0.81465
PTPRM	sp|P28827-2|PTPRM-HUMAN	0.0191059	0.0312645	0.797004	0.935248
S100A2	sp|P29034|S10A2-HUMAN	0.712735	0.758119	0.994407	0.998069
EBAG9	sp|O00559-2|RCAS1-HUMAN	0.586423	0.642316	0.230624	0.552646
GTF2E1	sp|P29083|T2EA-HUMAN	0.0359451	0.0551039	0.0286082	0.183955
GTF2E2	sp|P29084|T2EB-HUMAN	2.5958e-07	1.2144e-06	0.194609	0.509799
IMPA1	sp|P29218-3|IMPA1-HUMAN	0.000339082	0.000803359	0.0641732	0.286003
SHC1	sp|P29353-6|SHC1-HUMAN	0.0112852	0.019509	0.00281885	0.0467692
CRABP2	sp|P29373|RABP2-HUMAN	4.98071e-09	3.84006e-08	0.536882	0.810641
KDM5A	sp|P29375|KDM5A-HUMAN	0.191975	0.24501	0.78316	0.930249
TKT	sp|P29401-2|TKT-HUMAN	0.0166926	0.0277087	0.439043	0.743783
CASP1	sp|P29466|CASP1-HUMAN	0.000105869	0.000277335	0.276477	0.604695
LMOD1	sp|P29536|LMOD1-HUMAN	9.99861e-18	1.02441e-14	1.46556e-10	1.5692e-07
PML	sp|P29590|PML-HUMAN	7.723e-09	5.5854e-08	0.137216	0.422463
MPHOSPH10	sp|O00566|MPP10-HUMAN	1.93581e-08	1.22597e-07	0.60737	0.847415
MARCKS	sp|P29966|MARCS-HUMAN	0.108082	0.147582	0.00915277	0.0942532
GNA11	sp|P29992|GNA11-HUMAN	0.00171035	0.00351876	0.477558	0.770626
ALDH4A1	sp|P30038|AL4A1-HUMAN	9.4663e-10	9.35571e-09	0.287846	0.614144
PBLD	sp|P30039|PBLD-HUMAN	2.95084e-05	8.70988e-05	0.0146407	0.124607
ERP29	sp|P30040|ERP29-HUMAN	0.443546	0.507691	0.00218106	0.0400083
PRDX5	sp|P30044|PRDX5-HUMAN	4.15644e-13	2.16534e-11	0.700408	0.894277
DDT	sp|P30046|DOPD-HUMAN	1.32064e-09	1.24515e-08	0.197423	0.514107
PRDX3	sp|P30048|PRDX3-HUMAN	4.31325e-08	2.47495e-07	0.734021	0.908877
ATP5D	sp|P30049|ATPD-HUMAN	1.14394e-05	3.66258e-05	0.185127	0.49652
RPL12	sp|P30050|RL12-HUMAN	0.04413	0.0662309	0.0694403	0.297265
NOP56	sp|O00567|NOP56-HUMAN	1.10944e-10	1.60598e-09	0.035681	0.207057
ECHS1	sp|P30084|ECHM-HUMAN	1.88222e-09	1.69162e-08	0.543368	0.813641
CMPK1	sp|P30085|KCY-HUMAN	8.88009e-10	8.91004e-09	0.369419	0.687053
PDIA3	sp|P30101|PDIA3-HUMAN	0.00069265	0.00153939	0.366283	0.68472
PPP2R1A	sp|P30153|2AAA-HUMAN	0.104008	0.142568	0.0060998	0.0737807
PPP2R1B	sp|P30154-2|2AAB-HUMAN	2.14587e-08	1.34606e-07	0.13094	0.413067
CDC27	sp|P30260-2|CDC27-HUMAN	1.36087e-11	2.95957e-10	0.837827	0.949365
CCND3	sp|P30281|CCND3-HUMAN	3.21359e-07	1.45973e-06	0.451069	0.752261
CDC25B	sp|P30305-4|MPIP2-HUMAN	1.79436e-05	5.55229e-05	0.135266	0.419115
NKTR	sp|P30414|NKTR-HUMAN	1.32778e-06	5.25922e-06	0.0170332	0.135726
NMT1	sp|P30419|NMT1-HUMAN	0.00169724	0.00349647	0.13259	0.415572
PEX12	sp|O00623|PEX12-HUMAN	0.000105901	0.00027734	0.924953	0.977234
ADSS	sp|P30520|PURA2-HUMAN	0.0522828	0.0770867	0.556771	0.821828
AXL	sp|P30530|UFO-HUMAN	8.29896e-17	4.02761e-14	0.156503	0.453657
LRPAP1	sp|P30533|AMRP-HUMAN	6.76963e-09	4.98584e-08	0.818277	0.944216
TSPO	sp|P30536|TSPO-HUMAN	1.5151e-05	4.74548e-05	0.22328	0.54427
ADSL	sp|P30566|PUR8-HUMAN	0.0189572	0.0310543	0.0877648	0.336499
CLIP1	sp|P30622-2|CLIP1-HUMAN	0.0811957	0.114411	0.110346	0.377033
CLIP1	sp|P30622|CLIP1-HUMAN	2.50127e-05	7.49567e-05	0.946503	0.985024
SRI	sp|P30626|SORCN-HUMAN	0.107099	0.146327	0.0707408	0.299796
GSTT1	sp|P30711|GSTT1-HUMAN	2.42585e-15	4.99378e-13	0.453428	0.753454
ALDH1B1	sp|P30837|AL1B1-HUMAN	3.20798e-06	1.16551e-05	0.00105968	0.0242463
PEX7	sp|O00628|PEX7-HUMAN	0.0605027	0.0878576	0.0615566	0.2792
POLR2B	sp|P30876|RPB2-HUMAN	7.43231e-10	7.79674e-09	0.510669	0.792341
GDI1	sp|P31150|GDIA-HUMAN	1.09973e-07	5.71948e-07	0.634544	0.861646
MAT2A	sp|P31153|METK2-HUMAN	1.10342e-09	1.06876e-08	0.237908	0.561334
PRKAR2B	sp|P31323|KAP3-HUMAN	0.981753	0.985279	0.21738	0.538111
CPS1	sp|P31327-3|CPSM-HUMAN	0.00089715	0.00195063	0.374719	0.6916
SDC4	sp|P31431|SDC4-HUMAN	0.0663202	0.0956127	0.0377644	0.213505
TIA1	sp|P31483|TIA1-HUMAN	0.0148677	0.0250585	0.244533	0.570072
DNAJA1	sp|P31689|DNJA1-HUMAN	0.000253712	0.000616464	0.66755	0.877088
AKT1	sp|P31749|AKT1-HUMAN	0.000120392	0.000311573	0.148646	0.441977
AKT2	sp|P31751|AKT2-HUMAN	0.752441	0.791948	0.816153	0.944216
KPNA4	sp|O00629|IMA3-HUMAN	0.0104211	0.0181925	0.394316	0.706566
UQCRC1	sp|P31930|QCR1-HUMAN	0.00397176	0.00756529	0.304554	0.628932
HIBADH	sp|P31937|3HIDH-HUMAN	3.6481e-10	4.29071e-09	0.863767	0.957207
ATIC	sp|P31939|PUR9-HUMAN	0.000660529	0.00147404	0.198326	0.515469
HNRNPH3	sp|P31942|HNRH3-HUMAN	1.66225e-11	3.39107e-10	0.651371	0.871198
YWHAB	sp|P31946|1433B-HUMAN	1.5184e-07	7.60106e-07	0.903317	0.970683
SFN	sp|P31947|1433S-HUMAN	0.127929	0.171184	0.244573	0.570072
STIP1	sp|P31948-2|STIP1-HUMAN	0.0996708	0.137276	0.548946	0.816687
L1CAM	sp|P32004|L1CAM-HUMAN	0.772273	0.810232	0.284868	0.612327
INPP5B	sp|P32019|I5P2-HUMAN	0.386981	0.452951	0.47717	0.770575
GK	sp|P32189|GLPK-HUMAN	3.59881e-05	0.000104617	0.714334	0.900214
ILVBL	sp|A1L0T0|ILVBL-HUMAN	0.00218073	0.00437237	0.413771	0.722063
TRIM38	sp|O00635|TRI38-HUMAN	0.0255713	0.0407172	0.00958033	0.0964412
CDA	sp|P32320|CDD-HUMAN	0.000859665	0.00187532	4.07908e-08	1.50453e-05
DCTD	sp|P32321-2|DCTD-HUMAN	0.000373774	0.00087833	0.670613	0.879019
PYCR1	sp|P32322-3|P5CR1-HUMAN	1.05436e-10	1.53673e-09	1.38392e-13	6.38057e-10
SLC8A1	sp|P32418-2|NAC1-HUMAN	0.00131523	0.00276964	0.076393	0.312204
GBP2	sp|P32456|GBP2-HUMAN	1.03764e-05	3.35487e-05	0.411576	0.719917
GTF2H1	sp|P32780|TF2H1-HUMAN	1.66119e-12	5.76234e-11	0.991044	0.997028
STX2	sp|P32856|STX2-HUMAN	5.51847e-06	1.89378e-05	0.57579	0.831797
CTH	sp|P32929|CGL-HUMAN	0.105153	0.143966	0.629513	0.858542
ACSL1	sp|P33121|ACSL1-HUMAN	0.00938387	0.0164974	0.61358	0.850386
CSTF2	sp|P33240|CSTF2-HUMAN	2.92734e-05	8.6516e-05	0.0999717	0.360265
E2F3	sp|O00716|E2F3-HUMAN	6.97507e-07	2.9275e-06	0.958864	0.989049
DUT	sp|P33316|DUT-HUMAN	9.57666e-13	3.92473e-11	0.871638	0.959722
ABCC1	sp|P33527|MRP1-HUMAN	7.38392e-10	7.7548e-09	0.298198	0.622796
CKS2	sp|P33552|CKS2-HUMAN	4.42513e-07	1.94398e-06	0.950576	0.985838
S100A3	sp|P33764|S10A3-HUMAN	0.459528	0.522996	0.46972	0.76403
ABCD1	sp|P33897|ABCD1-HUMAN	4.96643e-09	3.83225e-08	0.0147629	0.125234
MAN1A1	sp|P33908|MA1A1-HUMAN	1.86425e-05	5.73199e-05	0.858538	0.955647
TTK	sp|P33981|TTK-HUMAN	4.93131e-13	2.41352e-11	0.650472	0.871044
MCM5	sp|P33992|MCM5-HUMAN	5.39293e-13	2.59001e-11	0.813739	0.943438
MCM7	sp|P33993|MCM7-HUMAN	1.19178e-11	2.64382e-10	0.369065	0.686811
SDC2	sp|P34741|SDC2-HUMAN	0.430545	0.495513	0.970924	0.991456
PPP6C	sp|O00743-3|PPP6-HUMAN	0.320526	0.384389	0.10133	0.362437
EVI2B	sp|P34910-2|EVI2B-HUMAN	8.86717e-07	3.64206e-06	0.298953	0.623252
HSPA4	sp|P34932|HSP74-HUMAN	0.176821	0.228197	0.83125	0.947461
MPI	sp|P34949|MPI-HUMAN	4.34005e-09	3.39436e-08	0.0733829	0.30618
GPC1	sp|P35052|GPC1-HUMAN	0.00303816	0.0059153	0.155385	0.452309
PFN2	sp|P35080|PROF2-HUMAN	3.55445e-05	0.000103458	0.709563	0.898405
CTNNA1	sp|P35221|CTNA1-HUMAN	0.00348288	0.00671173	0.0932844	0.348108
CTNNB1	sp|P35222|CTNB1-HUMAN	0.649336	0.699968	0.321885	0.645672
PCGF2	sp|P35227|PCGF2-HUMAN	0.000614486	0.00137796	0.510815	0.792434
NF2	sp|P35240-2|MERL-HUMAN	2.07293e-07	9.98144e-07	0.26894	0.595701
RDX	sp|P35241-5|RADI-HUMAN	0.00195278	0.003963	0.475028	0.768462
MAN2B1	sp|O00754|MA2B1-HUMAN	1.1648e-10	1.67561e-09	0.982689	0.995045
RPA3	sp|P35244|RFA3-HUMAN	1.9311e-12	6.486e-11	0.227703	0.550023
RFC4	sp|P35249|RFC4-HUMAN	1.14991e-11	2.58618e-10	0.752915	0.917487
RFC2	sp|P35250|RFC2-HUMAN	8.04723e-13	3.43535e-11	0.896839	0.968322
RFC1	sp|P35251|RFC1-HUMAN	1.5837e-11	3.29646e-10	0.402995	0.713385
RPL22	sp|P35268|RL22-HUMAN	0.222124	0.278894	0.814233	0.943815
GTF2F1	sp|P35269|T2FA-HUMAN	0.00144152	0.00301138	0.0722006	0.302619
SPR	sp|P35270|SPRE-HUMAN	9.45496e-11	1.40393e-09	0.846195	0.951327
PTGER4	sp|P35408|PE2R4-HUMAN	0.000851264	0.00185919	0.327552	0.65047
THBS2	sp|P35442|TSP2-HUMAN	0.0282817	0.0444951	0.607349	0.847415
IDUA	sp|P35475|IDUA-HUMAN	2.68588e-05	8.00728e-05	0.0137226	0.120396
ACACB	sp|O00763|ACACB-HUMAN	0.508604	0.570887	0.00316537	0.0504981
CBS	sp|P35520-2|CBS-HUMAN	3.58684e-10	4.22944e-09	0.0172332	0.136284
FBN1	sp|P35555|FBN1-HUMAN	5.87597e-07	2.50844e-06	0.932782	0.979592
FBN2	sp|P35556|FBN2-HUMAN	4.1221e-06	1.4608e-05	0.000336675	0.0110088
IRS1	sp|P35568|IRS1-HUMAN	0.00117205	0.00249538	6.25918e-05	0.00333618
MYH9	sp|P35579|MYH9-HUMAN	2.58002e-08	1.58286e-07	0.85841	0.95562
MYH10	sp|P35580-3|MYH10-HUMAN	0.082173	0.115647	0.277277	0.605153
COPB2	sp|P35606|COPB2-HUMAN	9.6893e-06	3.15373e-05	0.793461	0.934023
SOAT1	sp|P35610|SOAT1-HUMAN	5.51205e-10	6.12369e-09	0.984702	0.995215
ADD1	sp|P35611-3|ADDA-HUMAN	3.97525e-05	0.000114549	0.119953	0.393626
ADD1	sp|P35611-4|ADDA-HUMAN	0.286365	0.34813	0.717848	0.902206
PLPP1	sp|O14494|PLPP1-HUMAN	0.00180049	0.00369022	0.26458	0.591125
BSG	sp|P35613|BASI-HUMAN	0.0035466	0.00682027	0.224544	0.545875
TIMP3	sp|P35625|TIMP3-HUMAN	5.31568e-05	0.000148849	0.408182	0.718222
FUS	sp|P35637|FUS-HUMAN	2.18281e-11	4.18455e-10	0.576973	0.832439
DEK	sp|P35659|DEK-HUMAN	9.81209e-10	9.63152e-09	0.253864	0.581387
SOX6	sp|P35712|SOX6-HUMAN	0.728708	0.77146	0.991823	0.997028
SOX11	sp|P35716|SOX11-HUMAN	0.00193887	0.00393796	0.558579	0.822817
ZNF93	sp|P35789|ZNF93-HUMAN	0.0106069	0.018454	0.614313	0.850538
CHKA	sp|P35790|CHKA-HUMAN	2.93573e-09	2.45202e-08	0.943823	0.983854
PPM1A	sp|P35813-3|PPM1A-HUMAN	2.52927e-09	2.16953e-08	0.32652	0.649632
HMGCL	sp|P35914|HMGCL-HUMAN	6.4546e-09	4.7921e-08	0.896636	0.968322
PLPP3	sp|O14495|PLPP3-HUMAN	0.00116539	0.00248234	0.0418131	0.226134
SLC16A2	sp|P36021|MOT8-HUMAN	0.307791	0.371144	0.230456	0.552616
GJC1	sp|P36383|CXG1-HUMAN	2.47338e-16	8.77193e-14	0.206848	0.527478
ARL2	sp|P36404|ARL2-HUMAN	0.122541	0.164787	0.978406	0.99349
ARL3	sp|P36405|ARL3-HUMAN	0.00309345	0.00601533	0.736496	0.910597
TRIM23	sp|P36406|TRI23-HUMAN	0.00320043	0.00619853	0.30517	0.629524
MAP2K2	sp|P36507|MP2K2-HUMAN	0.000513165	0.00116722	0.860814	0.956333
ATP5C1	sp|P36542|ATPG-HUMAN	3.73566e-05	0.000108322	0.197301	0.514094
CPOX	sp|P36551|HEM6-HUMAN	5.55947e-09	4.22034e-08	0.40973	0.719094
NUDT1	sp|P36639|8ODP-HUMAN	1.27397e-10	1.79074e-09	0.142119	0.431093
PGM1	sp|P36871-2|PGM1-HUMAN	0.00235078	0.00468075	0.515587	0.795382
SOCS2	sp|O14508|SOCS2-HUMAN	0.0157297	0.0262998	0.979851	0.993994
PPP1CC	sp|P36873-2|PP1G-HUMAN	0.1933	0.246497	0.497335	0.784232
FLT3	sp|P36888|FLT3-HUMAN	0.000851819	0.00185996	0.0549685	0.263717
BMPR1A	sp|P36894|BMR1A-HUMAN	1.66506e-07	8.1973e-07	0.350417	0.671569
ACVR1B	sp|P36896-4|ACV1B-HUMAN	0.236068	0.294638	0.467782	0.763526
TGFBR1	sp|P36897-2|TGFR1-HUMAN	0.00492101	0.00915959	0.420749	0.727099
LTBR	sp|P36941|TNR3-HUMAN	0.82796	0.857354	0.157815	0.455968
POLR2I	sp|P36954|RPB9-HUMAN	3.24106e-07	1.47113e-06	0.659287	0.873947
SREBF1	sp|P36956-4|SRBP1-HUMAN	0.000281663	0.000680069	0.627901	0.85802
DLST	sp|P36957|ODO2-HUMAN	1.26378e-06	5.02297e-06	0.386578	0.701306
GMPR	sp|P36959|GMPR1-HUMAN	8.55656e-08	4.5528e-07	0.764344	0.921791
CDK2AP1	sp|O14519|CDKA1-HUMAN	3.25408e-05	9.53475e-05	0.7749	0.927162
HSD17B2	sp|P37059|DHB2-HUMAN	0.494742	0.557704	0.00331087	0.0515701
SRP14	sp|P37108|SRP14-HUMAN	1.05752e-06	4.26946e-06	0.95627	0.988213
TGFBR2	sp|P37173-2|TGFR2-HUMAN	0.304803	0.367878	0.137155	0.422463
NUP62	sp|P37198|NUP62-HUMAN	8.73286e-05	0.000233353	0.675064	0.881545
FDFT1	sp|P37268|FDFT-HUMAN	3.24873e-05	9.52514e-05	0.101542	0.362632
ZEB1	sp|P37275-2|ZEB1-HUMAN	5.25395e-05	0.000147434	0.0146486	0.124607
TAGLN2	sp|P37802-2|TAGL2-HUMAN	3.38014e-16	1.15438e-13	0.00010947	0.00517651
SNCA	sp|P37840|SYUA-HUMAN	5.07625e-08	2.8699e-07	0.0827339	0.325341
ETFB	sp|P38117|ETFB-HUMAN	6.1942e-12	1.60892e-10	0.326997	0.649975
RBMX	sp|P38159|RBMX-HUMAN	1.30823e-09	1.23472e-08	0.248126	0.574579
C2CD2L	sp|O14523-2|C2C2L-HUMAN	8.85376e-07	3.63979e-06	0.653906	0.871918
BRCA1	sp|P38398-7|BRCA1-HUMAN	0.000945265	0.00204437	0.531923	0.807517
COIL	sp|P38432|COIL-HUMAN	7.10793e-06	2.37989e-05	0.891996	0.966737
LIPA	sp|P38571|LICH-HUMAN	5.83596e-07	2.49377e-06	0.815423	0.944107
ATP6V1A	sp|P38606|VATA-HUMAN	2.48336e-06	9.24093e-06	0.456938	0.756043
IGHMBP2	sp|P38935|SMBP2-HUMAN	0.235006	0.293543	0.226239	0.547545
RPL3	sp|P39023|RL3-HUMAN	4.43586e-06	1.55584e-05	0.834625	0.947905
COL18A1	sp|P39060|COIA1-HUMAN	0.0188058	0.0308282	8.34936e-07	0.00014716
ANP32A	sp|P39687|AN32A-HUMAN	0.000772105	0.00170325	0.0451084	0.235388
FEN1	sp|P39748|FEN1-HUMAN	3.41138e-12	1.02131e-10	0.383501	0.698315
CUX1	sp|P39880-3|CUX1-HUMAN	0.00170022	0.00350105	0.0497536	0.249471
PLEKHG3	sp|A1L390|PKHG3-HUMAN	0.342002	0.407284	0.00864133	0.0917992
NEMP1	sp|O14524|NEMP1-HUMAN	0.913311	0.929439	0.841204	0.950051
CAPG	sp|P40121|CAPG-HUMAN	0.0630102	0.0912257	0.0317925	0.194987
CAP2	sp|P40123|CAP2-HUMAN	5.75467e-12	1.51179e-10	0.21671	0.537599
IL6ST	sp|P40189|IL6RB-HUMAN	0.00632134	0.0114991	0.153446	0.448612
TXLNA	sp|P40222|TXLNA-HUMAN	1.3669e-06	5.39794e-06	0.329369	0.652211
NNMT	sp|P40261|NNMT-HUMAN	1.0201e-16	4.27563e-14	0.312313	0.63685
VHL	sp|P40337|VHL-HUMAN	0.364037	0.429861	0.585067	0.837847
PBX1	sp|P40424|PBX1-HUMAN	0.242889	0.302047	0.734519	0.909128
STAT3	sp|P40763|STAT3-HUMAN	1.437e-11	3.08153e-10	0.573322	0.830574
MDH1	sp|P40925-3|MDHC-HUMAN	4.15502e-06	1.46964e-05	0.234721	0.558402
MDH2	sp|P40926|MDHM-HUMAN	4.34736e-10	4.99838e-09	0.292795	0.618928
TXNDC9	sp|O14530|TXND9-HUMAN	0.0131923	0.0224523	0.0201631	0.149515
HADHA	sp|P40939|ECHA-HUMAN	2.93369e-10	3.5925e-09	0.596599	0.842031
EIF2S3	sp|P41091|IF2G-HUMAN	0.874672	0.897846	0.0293994	0.187
ETV5	sp|P41161-2|ETV5-HUMAN	0.195555	0.248926	0.655334	0.872693
ETV3	sp|P41162|ETV3-HUMAN	0.035008	0.0538014	0.0122434	0.112687
CETN2	sp|P41208|CETN2-HUMAN	0.198051	0.25165	0.136348	0.421131
ETV6	sp|P41212|ETV6-HUMAN	0.0476825	0.0709048	0.414795	0.722892
EIF2D	sp|P41214|EIF2D-HUMAN	1.55011e-05	4.84693e-05	0.143627	0.432804
BUD31	sp|P41223-2|BUD31-HUMAN	3.07262e-07	1.4026e-06	0.270989	0.598357
UBA7	sp|P41226|UBA7-HUMAN	0.0293185	0.0459929	0.0612446	0.278709
NAA10	sp|P41227|NAA10-HUMAN	0.00338	0.00652439	0.545463	0.814528
DPYSL4	sp|O14531|DPYL4-HUMAN	7.65719e-08	4.12017e-07	0.393743	0.706566
KDM5C	sp|P41229|KDM5C-HUMAN	3.54452e-07	1.59356e-06	0.638015	0.86339
PPP1R2	sp|P41236|IPP2-HUMAN	0.359044	0.424891	0.581717	0.834995
GARS	sp|P41250|SYG-HUMAN	0.00100459	0.00216433	0.83009	0.947193
PRKCI	sp|P41743|KPCI-HUMAN	0.512258	0.57401	0.0459472	0.236957
ACTR1B	sp|P42025|ACTY-HUMAN	4.90326e-06	1.70358e-05	0.119557	0.393164
ECI1	sp|P42126|ECI1-HUMAN	2.50078e-09	2.14908e-08	0.28296	0.610906
TMPO	sp|P42166|LAP2A-HUMAN	1.18156e-12	4.52083e-11	0.777793	0.927813
STAT1	sp|P42224|STAT1-HUMAN	7.24995e-12	1.79709e-10	0.714174	0.900137
SKIV2L2	sp|P42285|SK2L2-HUMAN	1.05493e-10	1.53673e-09	0.562524	0.825303
PIK3CB	sp|P42338|PK3CB-HUMAN	0.00272969	0.00535998	0.0308028	0.19154
TRAFD1	sp|O14545|TRAD1-HUMAN	0.332819	0.397427	0.00480161	0.0636144
MTOR	sp|P42345|MTOR-HUMAN	1.08136e-06	4.35424e-06	0.450554	0.752208
EPS15	sp|P42566|EPS15-HUMAN	0.00112143	0.00239257	0.0427492	0.228914
CASP3	sp|P42574|CASP3-HUMAN	0.00479065	0.0089386	0.0943712	0.350321
RPS27	sp|P42677|RS27-HUMAN	6.82033e-05	0.000186951	0.563453	0.825511
TEC	sp|P42680|TEC-HUMAN	0.463583	0.526766	0.611477	0.849242
ABL2	sp|P42684|ABL2-HUMAN	0.266744	0.327604	0.0508368	0.252114
NCAPD3	sp|P42695|CNDD3-HUMAN	1.88731e-12	6.39812e-11	0.261326	0.588447
RBM34	sp|P42696|RBM34-HUMAN	2.4346e-12	7.78099e-11	0.0510175	0.252649
LIFR	sp|P42702|LIFR-HUMAN	0.916698	0.932165	0.430784	0.735859
LRPPRC	sp|P42704|LPPRC-HUMAN	0.0160139	0.0267169	0.0975142	0.355969
COX7A2L	sp|O14548|COX7R-HUMAN	0.315082	0.378846	0.8929	0.966737
RPL35	sp|P42766|RL35-HUMAN	0.690241	0.737083	0.445375	0.749071
CDKN2C	sp|P42773|CDN2C-HUMAN	0.000116071	0.000301405	0.284793	0.612327
PRCP	sp|P42785-2|PCP-HUMAN	1.26886e-07	6.49288e-07	0.827737	0.945687
HTT	sp|P42858|HD-HUMAN	8.91509e-07	3.66011e-06	0.774931	0.927162
MTHFR	sp|P42898-2|MTHR-HUMAN	0.00106885	0.00228728	3.40997e-06	0.000430069
SLC1A1	sp|P43005|EAA3-HUMAN	6.5895e-11	1.05124e-09	0.00746571	0.0840553
SLC1A4	sp|P43007|SATT-HUMAN	2.75388e-09	2.32755e-08	0.493594	0.782325
PAFAH1B1	sp|P43034|LIS1-HUMAN	0.00325593	0.00629808	0.406319	0.71608
PTGER2	sp|P43116|PE2R2-HUMAN	0.0126376	0.0216118	0.672546	0.879857
MCAM	sp|P43121|MUC18-HUMAN	0.00198254	0.0040187	0.0128427	0.115647
NDUFAB1	sp|O14561|ACPM-HUMAN	0.030746	0.0479935	0.79161	0.933193
CRAT	sp|P43155|CACP-HUMAN	1.54377e-09	1.42779e-08	0.592795	0.840655
CTSO	sp|P43234|CATO-HUMAN	0.00316096	0.00613109	0.999677	0.999785
MSH2	sp|P43246|MSH2-HUMAN	2.21284e-13	1.46796e-11	0.1306	0.412561
GRK6	sp|P43250-2|GRK6-HUMAN	0.54432	0.603339	0.0348384	0.204484
GPD2	sp|P43304|GPDM-HUMAN	0.00972362	0.0170589	0.578581	0.833088
SSR1	sp|P43307|SSRA-HUMAN	0.0151731	0.025494	0.968742	0.991362
ALDH3B1	sp|P43353|AL3B1-HUMAN	7.64709e-05	0.000207211	0.00751743	0.084124
PTPN9	sp|P43378|PTN9-HUMAN	0.00316551	0.00613733	0.793684	0.934023
RANBP1	sp|P43487|RANG-HUMAN	5.02065e-06	1.73978e-05	0.757134	0.919975
NAMPT	sp|P43490|NAMPT-HUMAN	0.746902	0.786968	0.737959	0.91094
UBFD1	sp|O14562|UBFD1-HUMAN	4.20136e-15	7.04378e-13	1.13759e-05	0.00107038
TSFM	sp|P43897|EFTS-HUMAN	0.224458	0.281442	0.00518124	0.0665407
CBX5	sp|P45973|CBX5-HUMAN	1.48703e-10	2.02404e-09	0.513139	0.793551
USP5	sp|P45974|UBP5-HUMAN	0.000500882	0.00114181	0.748113	0.915806
MAPK9	sp|P45984|MK09-HUMAN	0.000526005	0.00119348	0.744869	0.914717
MAP2K4	sp|P45985-2|MP2K4-HUMAN	0.90668	0.92371	0.251064	0.57862
MKI67	sp|P46013|KI67-HUMAN	5.45634e-10	6.06911e-09	0.995058	0.998234
PHKA2	sp|P46019|KPB2-HUMAN	1.46456e-06	5.74667e-06	0.771356	0.925757
NOP2	sp|P46087-4|NOP2-HUMAN	1.88632e-13	1.29697e-11	0.0749641	0.308765
ATRX	sp|P46100|ATRX-HUMAN	0.000306285	0.000732811	0.00509041	0.0658326
CRK	sp|P46108-2|CRK-HUMAN	0.0329398	0.0510226	0.205757	0.526467
DYNC1I1	sp|O14576|DC1I1-HUMAN	0.00465615	0.00871232	0.970742	0.991456
CRKL	sp|P46109|CRKL-HUMAN	3.83976e-06	1.36969e-05	0.332582	0.655286
MTIF2	sp|P46199|IF2M-HUMAN	0.88908	0.909497	0.894483	0.96701
BAG6	sp|P46379-3|BAG6-HUMAN	2.28718e-05	6.91478e-05	5.86901e-07	0.000110445
NSF	sp|P46459|NSF-HUMAN	1.29626e-12	4.78113e-11	0.150312	0.444524
NOTCH1	sp|P46531|NOTC1-HUMAN	2.71904e-07	1.26628e-06	0.503025	0.786817
MAP2K3	sp|P46734-3|MP2K3-HUMAN	0.723882	0.767143	0.503488	0.786817
BRCC3	sp|P46736|BRCC3-HUMAN	0.110942	0.150996	0.987157	0.996014
RPL28	sp|P46779|RL28-HUMAN	0.00194663	0.00395197	0.953362	0.987082
RPS5	sp|P46782|RS5-HUMAN	0.00707109	0.0127648	0.334648	0.657504
RPS10	sp|P46783|RS10-HUMAN	0.0361032	0.0553003	0.302076	0.626404
CIT	sp|O14578-4|CTRO-HUMAN	1.39907e-14	1.79179e-12	0.161685	0.461863
GNPDA1	sp|P46926|GNPI1-HUMAN	0.137122	0.182138	0.0883334	0.337416
NEDD4	sp|P46934-4|NEDD4-HUMAN	0.0529366	0.0779508	0.435938	0.740849
NEDD4	sp|P46934|NEDD4-HUMAN	0.000188303	0.000468649	0.016809	0.134662
YAP1	sp|P46937-9|YAP1-HUMAN	0.00146618	0.00306013	0.193656	0.508314
UTRN	sp|P46939|UTRO-HUMAN	0.00401178	0.00762734	0.117592	0.389342
GYG1	sp|P46976-2|GLYG-HUMAN	0.392783	0.458521	0.128279	0.407766
STT3A	sp|P46977|STT3A-HUMAN	0.0995883	0.137265	0.441283	0.745527
RABIF	sp|P47224|MSS4-HUMAN	0.655556	0.705766	0.0476308	0.242643
PLA2G4A	sp|P47712|PA24A-HUMAN	1.10225e-08	7.57368e-08	0.580581	0.834274
CAPZB	sp|P47756|CAPZB-HUMAN	0.0569804	0.0833332	0.0924985	0.347142
COPE	sp|O14579|COPE-HUMAN	0.0566335	0.0828391	0.0623243	0.281023
EIF1AX	sp|P47813|IF1AX-HUMAN	0.113935	0.154613	0.330472	0.653017
ALDH1A3	sp|P47895|AL1A3-HUMAN	0.104335	0.142953	0.435945	0.740849
QARS	sp|P47897|SYQ-HUMAN	0.0792602	0.111957	0.064887	0.287794
ZFP36L2	sp|P47974|TISD-HUMAN	0.00144084	0.00301064	0.00797794	0.0873689
UQCRFS1	sp|P47985|UCRI-HUMAN	0.628498	0.681649	0.00716823	0.0816027
SLC6A8	sp|P48029|SC6A8-HUMAN	0.341513	0.406806	0.709904	0.898685
ATP5O	sp|P48047|ATPO-HUMAN	1.38617e-07	7.01146e-07	0.472196	0.766907
LIMS1	sp|P48059-3|LIMS1-HUMAN	0.312703	0.376379	4.32725e-05	0.00267796
GLIPR1	sp|P48060|GLIP1-HUMAN	0.0375878	0.0574026	0.0183474	0.142289
ME1	sp|P48163|MAOX-HUMAN	4.92842e-08	2.79489e-07	0.432526	0.737701
SSC5D	sp|A1L4H1|SRCRL-HUMAN	0.0195893	0.0319875	0.448252	0.750587
CDC42EP2	sp|O14613|BORG1-HUMAN	0.0177968	0.0293463	0.159802	0.459046
TFPI2	sp|P48307|TFPI2-HUMAN	0.733122	0.775243	4.99835e-05	0.00289873
PIP4K2A	sp|P48426|PI42A-HUMAN	0.291179	0.353517	0.471743	0.766375
SOX9	sp|P48436|SOX9-HUMAN	4.59737e-08	2.62491e-07	0.349723	0.671281
LSS	sp|P48449|ERG7-HUMAN	9.68998e-05	0.000256168	0.765245	0.921951
PPP3CC	sp|P48454-3|PP2BC-HUMAN	6.73402e-05	0.00018486	0.9316	0.979194
GCLC	sp|P48506|GSH1-HUMAN	6.27158e-11	1.00925e-09	0.0945941	0.350725
GCLM	sp|P48507|GSH0-HUMAN	0.0665472	0.0959099	0.289255	0.615468
TRAPPC10	sp|P48553|TPC10-HUMAN	3.44582e-06	1.2436e-05	0.840934	0.950051
PRRC2A	sp|P48634|PRC2A-HUMAN	0.000765691	0.00169031	0.0113778	0.107495
CSNK1A1	sp|P48729-3|KC1A-HUMAN	0.0049347	0.00917952	0.631124	0.859234
AP3D1	sp|O14617-5|AP3D1-HUMAN	8.34666e-06	2.75957e-05	0.519957	0.798131
CSNK1D	sp|P48730-2|KC1D-HUMAN	0.507306	0.569707	0.0515382	0.253729
PITPNB	sp|P48739-3|PIPNB-HUMAN	0.00577166	0.0105975	0.420677	0.727099
MASP1	sp|P48740-2|MASP1-HUMAN	6.32057e-05	0.000174706	0.0542914	0.261831
CD97	sp|P48960|CD97-HUMAN	0.0015893	0.00329367	0.0539121	0.261369
MARCKSL1	sp|P49006|MRP-HUMAN	1.4801e-07	7.42549e-07	0.151529	0.44669
CAMLG	sp|P49069|CAMLG-HUMAN	3.75461e-09	3.02349e-08	0.0627655	0.28246
MAPKAPK2	sp|P49137|MAPK2-HUMAN	0.880451	0.902673	0.00238321	0.0420183
DNASE1L1	sp|P49184|DNSL1-HUMAN	7.18527e-20	2.20851e-16	0.379542	0.69552
RPIA	sp|P49247|RPIA-HUMAN	0.0304305	0.0475512	0.0161592	0.131979
SLC11A2	sp|P49281-3|NRAM2-HUMAN	0.122144	0.164326	0.0310948	0.192433
CCS	sp|O14618|CCS-HUMAN	5.19101e-08	2.92403e-07	0.330581	0.653017
NASP	sp|P49321|NASP-HUMAN	4.2436e-09	3.34161e-08	0.558894	0.822817
FASN	sp|P49327|FAS-HUMAN	0.178492	0.230063	0.00877286	0.09234
MRPL19	sp|P49406|RM19-HUMAN	0.0129417	0.0220786	0.288844	0.61511
ARRB1	sp|P49407|ARRB1-HUMAN	8.76636e-07	3.60547e-06	0.545231	0.814352
TUFM	sp|P49411|EFTU-HUMAN	0.0040046	0.00761527	0.384228	0.698947
AMPH	sp|P49418|AMPH-HUMAN	0.245081	0.304444	0.00954276	0.0963768
ALDH7A1	sp|P49419-2|AL7A1-HUMAN	0.223478	0.280289	0.0811323	0.322188
CDC34	sp|P49427|UB2R1-HUMAN	0.290325	0.352619	0.171032	0.474882
CENPF	sp|P49454|CENPF-HUMAN	3.24804e-12	9.88455e-11	0.765882	0.922078
SRP9	sp|P49458|SRP09-HUMAN	1.30774e-05	4.151e-05	0.367281	0.685346
ABLIM1	sp|O14639|ABLM1-HUMAN	0.0324335	0.0503144	0.816044	0.944216
PCYT1A	sp|P49585|PCY1A-HUMAN	0.166849	0.216815	0.0849894	0.330955
AARS	sp|P49588|SYAC-HUMAN	5.35812e-12	1.42057e-10	0.00347299	0.0528457
CARS	sp|P49589-3|SYCC-HUMAN	7.89416e-11	1.22154e-09	0.576437	0.832298
PPM1F	sp|P49593|PPM1F-HUMAN	3.818e-07	1.70241e-06	0.0347568	0.204265
MAN2A2	sp|P49641|MA2A2-HUMAN	0.282169	0.343846	0.106785	0.372338
PRIM1	sp|P49642|PRI1-HUMAN	8.70952e-15	1.21683e-12	0.0701336	0.298432
PRIM2	sp|P49643|PRI2-HUMAN	1.15421e-14	1.56515e-12	0.0976835	0.35625
CASP4	sp|P49662|CASP4-HUMAN	0.856044	0.880783	0.980773	0.994142
CTCF	sp|P49711|CTCF-HUMAN	4.1829e-09	3.30227e-08	0.314588	0.639446
CEBPD	sp|P49716|CEBPD-HUMAN	0.321305	0.385173	0.0794011	0.317915
DVL1	sp|O14640|DVL1-HUMAN	0.0490672	0.0727895	0.067654	0.293883
PSMB3	sp|P49720|PSB3-HUMAN	0.0501215	0.0741728	0.0268045	0.177306
PSMB2	sp|P49721|PSB2-HUMAN	0.282521	0.344153	0.137834	0.42287
MCM2	sp|P49736|MCM2-HUMAN	9.36142e-13	3.87092e-11	0.453998	0.753661
YLPM1	sp|P49750-4|YLPM1-HUMAN	1.28385e-10	1.80189e-09	0.316465	0.641562
ACOT2	sp|P49753|ACOT2-HUMAN	4.80282e-08	2.73038e-07	0.526239	0.801811
VPS41	sp|P49754|VPS41-HUMAN	0.00055592	0.00125548	0.631305	0.859354
RBM25	sp|P49756|RBM25-HUMAN	3.90842e-08	2.27523e-07	0.974347	0.992648
CLK1	sp|P49759-3|CLK1-HUMAN	3.39802e-05	9.92496e-05	0.0602419	0.276639
CLK2	sp|P49760|CLK2-HUMAN	0.603765	0.657997	0.990207	0.996817
VEGFC	sp|P49767|VEGFC-HUMAN	0.000925367	0.00200583	0.0333943	0.200084
DVL2	sp|O14641|DVL2-HUMAN	0.804016	0.837059	0.0185533	0.14256
EIF2B2	sp|P49770|EI2BB-HUMAN	0.0134153	0.0228148	0.706949	0.896791
HINT1	sp|P49773|HINT1-HUMAN	0.0048162	0.00898447	0.0119684	0.111458
RANBP2	sp|P49792|RBP2-HUMAN	7.08931e-15	1.03763e-12	0.420696	0.727099
RGS19	sp|P49795|RGS19-HUMAN	1.82169e-06	6.97005e-06	0.520023	0.798131
RGS3	sp|P49796|RGS3-HUMAN	0.0176892	0.0291949	0.118182	0.390454
RGS4	sp|P49798-3|RGS4-HUMAN	0.0277294	0.043738	0.0118101	0.110335
RGS7	sp|P49802|RGS7-HUMAN	0.615259	0.668313	0.818691	0.944216
TSC2	sp|P49815-3|TSC2-HUMAN	1.69509e-05	5.261e-05	0.74626	0.914878
GSK3A	sp|P49840|GSK3A-HUMAN	0.0420042	0.0633498	0.0688129	0.296034
GSK3B	sp|P49841-2|GSK3B-HUMAN	0.495695	0.558505	0.640814	0.864769
CHD1	sp|O14646|CHD1-HUMAN	4.11393e-09	3.25619e-08	0.999875	0.999875
NT5C2	sp|P49902|5NTC-HUMAN	4.1191e-07	1.82432e-06	0.000549109	0.0153153
SEPHS1	sp|P49903|SPS1-HUMAN	1.12785e-06	4.52564e-06	0.788703	0.932389
MTHFS	sp|P49914|MTHFS-HUMAN	3.24394e-05	9.51412e-05	0.348634	0.670418
GMPS	sp|P49915|GUAA-HUMAN	2.08389e-13	1.40259e-11	0.752491	0.917334
LIG3	sp|P49916|DNLI3-HUMAN	8.15856e-12	1.96423e-10	0.695617	0.890625
LIG4	sp|P49917|DNLI4-HUMAN	1.58968e-05	4.95889e-05	0.485755	0.776758
MRE11	sp|P49959-3|MRE11-HUMAN	4.32303e-08	2.47902e-07	0.116802	0.3884
HNMT	sp|P50135|HNMT-HUMAN	0.39365	0.459358	0.363489	0.683609
GNAQ	sp|P50148|GNAQ-HUMAN	1.29454e-05	4.11194e-05	0.111386	0.378075
IDH3A	sp|P50213|IDH3A-HUMAN	0.0111798	0.0193667	0.118169	0.390454
CHD2	sp|O14647|CHD2-HUMAN	0.0443531	0.0664792	0.726027	0.90481
MMP14	sp|P50281|MMP14-HUMAN	0.00437097	0.00823048	0.00131745	0.0278628
PPOX	sp|P50336|PPOX-HUMAN	3.23046e-05	9.48362e-05	0.749415	0.915885
EMD	sp|P50402|EMD-HUMAN	0.00662502	0.0120089	0.452105	0.75258
SLC26A2	sp|P50443|S26A2-HUMAN	0.289074	0.351239	0.992033	0.997028
SERPINB8	sp|P50452|SPB8-HUMAN	2.16206e-05	6.56665e-05	0.0162854	0.132351
SERPINH1	sp|P50454|SERPH-HUMAN	0.00971132	0.0170406	0.0728763	0.30462
PDLIM4	sp|P50479|PDLI4-HUMAN	2.52486e-12	8.02819e-11	0.607343	0.847415
ERF	sp|P50548|ERF-HUMAN	0.131181	0.175028	0.0189673	0.143712
VASP	sp|P50552|VASP-HUMAN	0.0162258	0.0270167	0.218782	0.539576
DNM2	sp|P50570-4|DYN2-HUMAN	4.92364e-05	0.000139053	0.273754	0.601737
TOR1B	sp|O14657|TOR1B-HUMAN	0.0245927	0.039323	0.296919	0.620979
NUDT2	sp|P50583|AP4A-HUMAN	0.206433	0.261113	0.71944	0.902226
TUB	sp|P50607-2|TUB-HUMAN	0.774865	0.812397	0.109991	0.376475
HLCS	sp|P50747|BPL1-HUMAN	0.690166	0.737083	0.155765	0.452931
KNTC1	sp|P50748|KNTC1-HUMAN	4.19175e-12	1.18202e-10	0.543555	0.81373
RASSF2	sp|P50749|RASF2-HUMAN	0.531368	0.591185	0.107493	0.373471
CDK9	sp|P50750-2|CDK9-HUMAN	2.53097e-07	1.1895e-06	0.28509	0.61235
LRBA	sp|P50851|LRBA-HUMAN	0.599257	0.654012	0.943212	0.983854
PPT1	sp|P50897|PPT1-HUMAN	2.43589e-07	1.1495e-06	0.104321	0.367004
CCT4	sp|P50991|TCPD-HUMAN	0.00589224	0.0107974	0.0863748	0.333108
FXR2	sp|P51116|FXR2-HUMAN	0.0205983	0.0335103	0.712694	0.899902
STX16	sp|O14662-2|STX16-HUMAN	0.38955	0.455323	0.986983	0.996002
RAB5C	sp|P51148-2|RAB5C-HUMAN	0.00130346	0.00274787	0.0691187	0.296896
RAB7A	sp|P51149|RAB7A-HUMAN	0.593947	0.649524	0.113844	0.381728
RAB9A	sp|P51151|RAB9A-HUMAN	0.0703654	0.100736	0.018555	0.14256
RAB28	sp|P51157|RAB28-HUMAN	0.319613	0.383395	0.470467	0.764841
RAB27A	sp|P51159|RB27A-HUMAN	0.612604	0.665977	0.881166	0.96339
PLCD1	sp|P51178|PLCD1-HUMAN	0.0753205	0.107065	0.544416	0.814284
DAP3	sp|P51398|RT29-HUMAN	0.0318288	0.049468	0.163585	0.464506
DUSP3	sp|P51452|DUS3-HUMAN	0.000954221	0.00206159	0.00480933	0.0636254
MMP15	sp|P51511|MMP15-HUMAN	0.277896	0.339357	0.0304298	0.190661
MMP16	sp|P51512|MMP16-HUMAN	7.82605e-12	1.90406e-10	0.00181275	0.0351163
SH3PXD2B	sp|A1X283|SPD2B-HUMAN	0.00506728	0.00940527	0.284354	0.612294
ABCD4	sp|O14678|ABCD4-HUMAN	0.00672266	0.0121739	0.218933	0.539576
SMARCA2	sp|P51531|SMCA2-HUMAN	2.25802e-10	2.87983e-09	0.0992283	0.359137
IDH3G	sp|P51553|IDH3G-HUMAN	0.00291137	0.00568283	0.924033	0.977098
GALK1	sp|P51570-2|GALK1-HUMAN	3.10151e-09	2.56977e-08	2.80037e-05	0.00197116
SSR4	sp|P51571|SSRD-HUMAN	0.0059498	0.0108877	0.384814	0.699737
BCAP31	sp|P51572-2|BAP31-HUMAN	5.93185e-06	2.02584e-05	0.421574	0.727338
BRCA2	sp|P51587|BRCA2-HUMAN	0.00031054	0.000741622	0.843324	0.950283
HCFC1	sp|P51610|HCFC1-HUMAN	0.000148634	0.000378605	0.911096	0.973377
IRAK1	sp|P51617|IRAK1-HUMAN	0.39293	0.458634	0.0909563	0.343451
ALDH3A2	sp|P51648-2|AL3A2-HUMAN	0.268948	0.330005	0.0300874	0.189553
ALDH5A1	sp|P51649-2|SSDH-HUMAN	2.80131e-15	5.49592e-13	0.00195327	0.0368326
EI24	sp|O14681|EI24-HUMAN	0.0252905	0.0403258	0.932498	0.979558
HSD17B4	sp|P51659|DHB4-HUMAN	2.92591e-07	1.3463e-06	0.906652	0.971208
PSMD7	sp|P51665|PSMD7-HUMAN	0.535779	0.595198	0.0808565	0.321231
SUOX	sp|P51687|SUOX-HUMAN	0.034065	0.0525361	0.552992	0.818876
ARSD	sp|P51689|ARSD-HUMAN	2.09471e-06	7.93238e-06	0.586108	0.838167
STAT5B	sp|P51692|STA5B-HUMAN	0.888955	0.909497	0.0418897	0.226283
USP11	sp|P51784|UBP11-HUMAN	0.000625207	0.00139996	0.0857511	0.332371
CLCN3	sp|P51790|CLCN3-HUMAN	5.53681e-06	1.89866e-05	0.315959	0.641111
CLCN5	sp|P51795-2|CLCN5-HUMAN	0.239972	0.298823	0.485615	0.776732
CLCN6	sp|P51797-5|CLCN6-HUMAN	0.0803351	0.113337	0.802541	0.93821
CLCN7	sp|P51798|CLCN7-HUMAN	6.55439e-05	0.000180628	0.129484	0.410582
KMT2D	sp|O14686-3|KMT2D-HUMAN	6.17997e-06	2.09814e-05	0.758057	0.919975
PLXNA3	sp|P51805|PLXA3-HUMAN	2.76832e-06	1.02025e-05	0.587497	0.839258
VAMP7	sp|P51809|VAMP7-HUMAN	0.00907312	0.0160213	0.0181261	0.141405
RPS6KA3	sp|P51812|KS6A3-HUMAN	0.00128757	0.0027181	0.0523646	0.256292
PRKX	sp|P51817|PRKX-HUMAN	0.152609	0.200285	0.664036	0.875069
ADCY7	sp|P51828|ADCY7-HUMAN	0.167401	0.21747	0.187248	0.499166
AKR1D1	sp|P51857|AK1D1-HUMAN	4.56284e-05	0.000129898	0.253666	0.581197
HDGF	sp|P51858|HDGF-HUMAN	0.185332	0.237783	0.00110716	0.0249612
LUM	sp|P51884|LUM-HUMAN	4.04375e-07	1.79353e-06	0.000911098	0.0218214
CNN1	sp|P51911|CNN1-HUMAN	7.8798e-14	7.3913e-12	0.480923	0.773513
MNAT1	sp|P51948|MAT1-HUMAN	0.000225567	0.000552004	0.714045	0.900137
APAF1	sp|O14727|APAF-HUMAN	0.0326107	0.0505654	0.168572	0.472319
NEK3	sp|P51956|NEK3-HUMAN	0.000495418	0.00113048	0.0648744	0.287794
NEK4	sp|P51957|NEK4-HUMAN	0.224604	0.28151	0.0779588	0.315906
CCNG1	sp|P51959|CCNG1-HUMAN	0.005003	0.00929531	0.469636	0.76403
UBE2E1	sp|P51965|UB2E1-HUMAN	2.31774e-12	7.57868e-11	0.010982	0.104732
NDUFA8	sp|P51970|NDUA8-HUMAN	0.00390961	0.00746079	0.062268	0.281023
HNRNPA3	sp|P51991|ROA3-HUMAN	0.00805212	0.0144032	0.783556	0.930479
PGD	sp|P52209|6PGD-HUMAN	1.81459e-05	5.6036e-05	0.461822	0.75888
HNRNPM	sp|P52272|HNRPM-HUMAN	2.24893e-08	1.40023e-07	0.26693	0.593709
KPNA1	sp|P52294|IMA5-HUMAN	0.948758	0.958219	2.70883e-05	0.00195142
NCBP2	sp|P52298|NCBP2-HUMAN	3.14077e-07	1.42947e-06	0.748641	0.915806
RIOK3	sp|O14730|RIOK3-HUMAN	0.900985	0.919447	0.0160812	0.131575
RAP1GDS1	sp|P52306-5|GDS1-HUMAN	0.0099567	0.0174346	0.174336	0.480439
JAK3	sp|P52333|JAK3-HUMAN	0.0131611	0.0224074	0.223932	0.545254
DGKE	sp|P52429|DGKE-HUMAN	0.000977246	0.00211084	0.358668	0.679876
POLR2H	sp|P52434|RPAB3-HUMAN	2.15767e-08	1.35254e-07	0.892929	0.966737
ARHGDIA	sp|P52565|GDIR1-HUMAN	0.0301077	0.0471026	0.000667584	0.01735
SLC7A2	sp|P52569-3|CTR2-HUMAN	1.91724e-17	1.60717e-14	0.21767	0.538539
GTF2A1	sp|P52655|TF2AA-HUMAN	1.23805e-07	6.35283e-07	0.908785	0.972147
MSH6	sp|P52701|MSH6-HUMAN	1.01399e-13	8.42344e-12	0.548477	0.816518
KIF11	sp|P52732|KIF11-HUMAN	1.26385e-12	4.71818e-11	0.549136	0.816805
VAV2	sp|P52735|VAV2-HUMAN	0.182842	0.235046	0.409152	0.718722
MAP2K7	sp|O14733-3|MP2K7-HUMAN	0.55237	0.610939	0.533152	0.808458
ZNF131	sp|P52739|ZN131-HUMAN	0.000297409	0.000713055	0.978123	0.99349
ZNF143	sp|P52747|ZN143-HUMAN	0.130387	0.17407	0.842706	0.950051
SMS	sp|P52788|SPSY-HUMAN	2.83851e-06	1.04196e-05	0.0392663	0.21838
HK2	sp|P52789|HXK2-HUMAN	0.00211498	0.00426371	0.0299804	0.189219
EFNB2	sp|P52799|EFNB2-HUMAN	2.8233e-05	8.37095e-05	0.599875	0.843133
NDST1	sp|P52848|NDST1-HUMAN	0.174215	0.225243	0.267076	0.593709
NDST2	sp|P52849|NDST2-HUMAN	0.72221	0.765812	0.975831	0.993162
HMGA2	sp|P52926|HMGA2-HUMAN	0.529366	0.589385	0.192663	0.506861
NUP98	sp|P52948|NUP98-HUMAN	2.31561e-09	2.0127e-08	0.494827	0.78291
PLK1	sp|P53350|PLK1-HUMAN	8.01573e-14	7.3913e-12	0.28721	0.61401
PDCD5	sp|O14737|PDCD5-HUMAN	0.00108111	0.00231136	0.000240331	0.00855633
ARFIP1	sp|P53367-2|ARFP1-HUMAN	0.361145	0.426829	0.0373993	0.212483
NUBP1	sp|P53384|NUBP1-HUMAN	0.37475	0.440593	0.762901	0.921223
ACLY	sp|P53396-2|ACLY-HUMAN	0.00460037	0.00862371	0.131297	0.413629
METAP1	sp|P53582|MAP11-HUMAN	6.60259e-08	3.61535e-07	0.268643	0.595471
SUCLG1	sp|P53597|SUCA-HUMAN	0.00178407	0.00365739	0.72295	0.903618
MVD	sp|P53602|MVD1-HUMAN	1.39467e-06	5.49112e-06	0.0216345	0.155488
PGGT1B	sp|P53609|PGTB1-HUMAN	4.71957e-07	2.06154e-06	0.130488	0.412561
RABGGTB	sp|P53611|PGTB2-HUMAN	0.000493122	0.00112551	0.360164	0.68037
COPB1	sp|P53618|COPB-HUMAN	0.32612	0.390184	0.148664	0.441977
COPA	sp|P53621|COPA-HUMAN	0.160468	0.209349	0.59211	0.840382
PRMT5	sp|O14744|ANM5-HUMAN	0.606207	0.660113	0.0700117	0.298432
LIMK2	sp|P53671-3|LIMK2-HUMAN	0.815209	0.845485	0.508693	0.791005
CLTCL1	sp|P53675|CLH2-HUMAN	0.0293164	0.0459929	0.00329139	0.0513535
AP3M2	sp|P53677|AP3M2-HUMAN	1.13448e-06	4.54827e-06	0.0264428	0.176019
HCCS	sp|P53701|CCHL-HUMAN	0.047812	0.0710853	0.443139	0.747197
ITGA8	sp|P53708|ITA8-HUMAN	0.352174	0.417833	0.872007	0.959864
MAPK12	sp|P53778|MK12-HUMAN	0.0430442	0.0647911	0.159714	0.459046
MAPK10	sp|P53779|MK10-HUMAN	0.989216	0.991199	0.103629	0.366338
SLC5A3	sp|P53794|SC5A3-HUMAN	0.00011288	0.000293699	0.542153	0.813337
PTTG1IP	sp|P53801|PTTG-HUMAN	0.000739076	0.00163587	0.170391	0.474103
TTC3	sp|P53804|TTC3-HUMAN	0.464321	0.527474	0.368801	0.686459
SLC9A3R1	sp|O14745|NHRF1-HUMAN	0.0979075	0.135191	9.19946e-06	0.000912131
SMTN	sp|P53814-5|SMTN-HUMAN	0.0202868	0.0330327	0.0113205	0.107063
IST1	sp|P53990-2|IST1-HUMAN	0.000824064	0.00180749	0.808049	0.941123
SEC24C	sp|P53992|SC24C-HUMAN	0.000198384	0.000492012	0.0797464	0.318606
CLNS1A	sp|P54105|ICLN-HUMAN	0.0156156	0.0261375	0.469	0.764009
BLM	sp|P54132|BLM-HUMAN	6.21883e-06	2.10823e-05	0.561293	0.824161
RARS	sp|P54136|SYRC-HUMAN	0.00972935	0.0170657	0.000631326	0.0169228
HIRA	sp|P54198|HIRA-HUMAN	0.00171111	0.00351904	0.395407	0.706571
PMS1	sp|P54277|PMS1-HUMAN	1.1414e-07	5.90954e-07	0.0167551	0.134347
PMS2	sp|P54278|PMS2-HUMAN	3.7022e-09	2.98719e-08	0.0998207	0.360265
CACNB3	sp|P54284|CACB3-HUMAN	0.00583641	0.0107014	0.0174986	0.13791
TERT	sp|O14746|TERT-HUMAN	0.737322	0.778702	9.17012e-05	0.00464161
CACNA2D1	sp|P54289-4|CA2D1-HUMAN	4.89568e-09	3.79196e-08	0.00628171	0.0753233
USP14	sp|P54578|UBP14-HUMAN	9.01575e-06	2.96167e-05	0.936649	0.981459
PRKAG1	sp|P54619-3|AAKG1-HUMAN	0.000122732	0.000317273	0.21722	0.538003
HSPA2	sp|P54652|HSP72-HUMAN	0.167699	0.217797	1.22176e-07	3.30865e-05
BCAT1	sp|P54687-5|BCAT1-HUMAN	0.112958	0.153398	0.0183268	0.142249
BCAT1	sp|P54687|BCAT1-HUMAN	0.427669	0.492695	0.962604	0.989645
ATP1B3	sp|P54709|AT1B3-HUMAN	0.672393	0.720862	0.0372008	0.211877
RAD23A	sp|P54725|RD23A-HUMAN	0.72942	0.772125	0.121876	0.397249
RAD23B	sp|P54727|RD23B-HUMAN	0.00148038	0.00308626	0.987471	0.996076
EPHB3	sp|P54753|EPHB3-HUMAN	8.79345e-09	6.2229e-08	0.0203471	0.149939
FAM92A1	sp|A1XBS5|F92A1-HUMAN	0.000375299	0.000881465	0.0218742	0.156521
CHEK1	sp|O14757|CHK1-HUMAN	3.29992e-12	9.91165e-11	0.514954	0.794933
EPHB4	sp|P54760|EPHB4-HUMAN	0.0426021	0.064199	0.00431942	0.0597142
EPHB1	sp|P54762|EPHB1-HUMAN	0.0128906	0.0219997	0.170605	0.474269
AK2	sp|P54819|KAD2-HUMAN	0.00772041	0.0138502	0.482357	0.773915
PRRX1	sp|P54821|PRRX1-HUMAN	0.000693113	0.00154005	0.653215	0.871918
ALDH18A1	sp|P54886|P5CS-HUMAN	9.59228e-09	6.70587e-08	0.000326058	0.0108541
EIF5	sp|P55010|IF5-HUMAN	0.000176811	0.000442435	0.417227	0.723627
SLC12A2	sp|P55011|S12A2-HUMAN	1.06198e-07	5.54805e-07	0.464218	0.760532
PSMD4	sp|P55036|PSMD4-HUMAN	0.508826	0.570997	0.841777	0.950051
DRG2	sp|P55039|DRG2-HUMAN	0.380365	0.446114	0.0236058	0.163003
GEM	sp|P55040|GEM-HUMAN	8.36181e-14	7.59101e-12	0.00257489	0.0442967
TNFRSF10B	sp|O14763|TR10B-HUMAN	0.464497	0.527609	0.000920243	0.0219833
CSE1L	sp|P55060|XPO2-HUMAN	2.86389e-08	1.72601e-07	0.358421	0.679876
TMBIM6	sp|P55061-2|BI1-HUMAN	0.210581	0.265887	0.8795	0.962702
VCP	sp|P55072|TERA-HUMAN	7.52094e-09	5.46498e-08	0.555068	0.820633
MFAP1	sp|P55081|MFAP1-HUMAN	7.50889e-06	2.49872e-05	0.251248	0.578756
MFAP3	sp|P55082|MFAP3-HUMAN	1.63647e-08	1.06567e-07	0.363219	0.683379
HADHB	sp|P55084|ECHB-HUMAN	5.75374e-10	6.32362e-09	0.551748	0.818174
F2RL1	sp|P55085|PAR2-HUMAN	0.361904	0.427565	0.14515	0.434979
AFDN	sp|P55196-1|AFAD-HUMAN	0.0101735	0.0177906	0.326644	0.649632
AFDN	sp|P55196-5|AFAD-HUMAN	1.93075e-09	1.72681e-08	0.0792707	0.317568
BRPF1	sp|P55201-2|BRPF1-HUMAN	5.6186e-05	0.00015657	0.418359	0.724584
TCERG1	sp|O14776|TCRG1-HUMAN	1.34354e-08	8.97088e-08	0.511374	0.792839
CASP7	sp|P55210-3|CASP7-HUMAN	0.959636	0.966343	0.736032	0.910389
CASP6	sp|P55212|CASP6-HUMAN	2.03262e-06	7.71944e-06	0.617431	0.853317
ADK	sp|P55263|ADK-HUMAN	0.0018634	0.00380057	0.0624717	0.281413
ADAR	sp|P55265-4|DSRAD-HUMAN	6.68336e-05	0.000183742	0.0679241	0.294738
LAMB2	sp|P55268|LAMB2-HUMAN	0.0242905	0.0388792	0.177316	0.485147
CDH4	sp|P55283|CADH4-HUMAN	5.04482e-05	0.000142127	0.251891	0.579318
CDH6	sp|P55285|CADH6-HUMAN	0.408487	0.473853	0.121285	0.396445
CDH13	sp|P55290-4|CAD13-HUMAN	1.88576e-08	1.19756e-07	1.44921e-07	3.61166e-05
SEC13	sp|P55735-3|SEC13-HUMAN	0.70478	0.75087	0.229147	0.550823
NPEPPS	sp|P55786|PSA-HUMAN	6.93264e-12	1.74185e-10	0.339172	0.660713
NDC80	sp|O14777|NDC80-HUMAN	1.6905e-11	3.43351e-10	0.610288	0.848788
GFER	sp|P55789|ALR-HUMAN	0.299797	0.362738	0.875598	0.96077
HNRNPH2	sp|P55795|HNRH2-HUMAN	0.409546	0.474962	0.00921064	0.0942705
EIF3B	sp|P55884-2|EIF3B-HUMAN	0.0077128	0.0138419	0.085469	0.331976
BID	sp|P55957-2|BID-HUMAN	1.52727e-08	9.99499e-08	0.000246768	0.00862183
GFRA1	sp|P56159|GFRA1-HUMAN	1.91162e-09	1.71136e-08	0.175424	0.481748
NDUFV3	sp|P56181|NDUV3-HUMAN	1.11003e-05	3.57014e-05	0.131676	0.414292
ITGA1	sp|P56199|ITA1-HUMAN	0.0454915	0.0679756	0.00194492	0.0367502
MAZ	sp|P56270-2|MAZ-HUMAN	7.04786e-10	7.47851e-09	0.277528	0.60527
CMC4	sp|P56277|CMC4-HUMAN	0.806949	0.839449	0.45553	0.754822
ATP5I	sp|P56385|ATP5I-HUMAN	2.80863e-07	1.30012e-06	0.0714027	0.301053
NRP1	sp|O14786|NRP1-HUMAN	2.43704e-15	4.99378e-13	0.068432	0.295417
HDAC4	sp|P56524|HDAC4-HUMAN	0.876649	0.899504	0.0860286	0.333059
EIF6	sp|P56537|IF6-HUMAN	0.718018	0.762155	0.000552328	0.0153404
CTBP2	sp|P56545-2|CTBP2-HUMAN	7.60245e-07	3.16346e-06	0.880072	0.962782
NDUFA6	sp|P56556|NDUA6-HUMAN	0.255469	0.31527	0.0378885	0.213885
TMEM50B	sp|P56557|TM50B-HUMAN	0.736649	0.778169	0.596133	0.84189
ARL4C	sp|P56559-2|ARL4C-HUMAN	0.0261182	0.0414663	4.65081e-05	0.00276678
PEX3	sp|P56589|PEX3-HUMAN	9.7572e-05	0.000257797	0.135569	0.419491
PRSS12	sp|P56730|NETR-HUMAN	0.777786	0.81503	0.0431434	0.229957
BACE1	sp|P56817|BACE1-HUMAN	0.841141	0.868648	0.52216	0.79994
HSD17B7	sp|P56937|DHB7-HUMAN	0.812225	0.84332	0.739805	0.912363
POLR3A	sp|O14802|RPC1-HUMAN	1.78445e-10	2.35063e-09	0.317011	0.641651
BCAR1	sp|P56945-6|BCAR1-HUMAN	0.0144576	0.0244388	0.487171	0.777467
PRDM15	sp|P57071|PRD15-HUMAN	0.00736836	0.0132521	0.46074	0.758523
MAP3K7CL	sp|P57077|M3KCL-HUMAN	1.02453e-05	3.32062e-05	0.464899	0.760766
WDR4	sp|P57081|WDR4-HUMAN	1.77079e-07	8.6623e-07	0.926505	0.977557
JAM2	sp|P57087-3|JAM2-HUMAN	0.00996495	0.0174424	0.486654	0.77691
TMEM33	sp|P57088|TMM33-HUMAN	0.457203	0.520606	0.0031118	0.0499025
EVC	sp|P57679|EVC-HUMAN	0.00142104	0.00297264	0.56427	0.825986
PCBP3	sp|P57721|PCBP3-HUMAN	0.0844092	0.118523	0.277239	0.605153
CORO7	sp|P57737-3|CORO7-HUMAN	0.149564	0.196849	0.777023	0.927379
NUP107	sp|P57740|NU107-HUMAN	2.41357e-09	2.08972e-08	0.843581	0.950283
MRAS	sp|O14807|RASM-HUMAN	5.19065e-05	0.000145861	0.672109	0.879548
SNX16	sp|P57768|SNX16-HUMAN	0.787088	0.822652	0.952784	0.986816
EEFSEC	sp|P57772|SELB-HUMAN	0.210283	0.265583	0.736286	0.910486
SESN2	sp|P58004|SESN2-HUMAN	0.164518	0.214159	0.00658522	0.0770285
LOXL3	sp|P58215|LOXL3-HUMAN	0.255533	0.315305	0.0773119	0.313955
ANTXR2	sp|P58335|ANTR2-HUMAN	3.39754e-09	2.77983e-08	0.196075	0.512474
ADAMTS12	sp|P58397|ATS12-HUMAN	2.82134e-13	1.6362e-11	0.000728433	0.0185549
YBEY	sp|P58557|YBEY-HUMAN	0.0118101	0.0203248	0.0785148	0.316151
ZNF445	sp|P59923|ZN445-HUMAN	0.000117489	0.000304659	0.32774	0.650471
ARPC4	sp|P59998-3|ARPC4-HUMAN	2.94215e-05	8.68919e-05	0.245178	0.570575
CD81	sp|P60033|CD81-HUMAN	4.57271e-07	2.00213e-06	0.65281	0.871918
RASGRF2	sp|O14827|RGRF2-HUMAN	0.105354	0.144221	0.841473	0.950051
TPI1	sp|P60174|TPIS-HUMAN	4.99323e-07	2.16875e-06	0.953767	0.987169
SEC61B	sp|P60468|SC61B-HUMAN	0.556215	0.614161	0.799378	0.936358
GABARAPL2	sp|P60520|GBRL2-HUMAN	0.541227	0.600705	0.568808	0.827937
UBE2G2	sp|P60604|UB2G2-HUMAN	0.510513	0.572542	0.568791	0.827937
RAC3	sp|P60763|RAC3-HUMAN	0.000932785	0.00202001	0.528566	0.804275
EIF4A1	sp|P60842|IF4A1-HUMAN	3.22323e-08	1.91751e-07	0.158468	0.457064
RPS20	sp|P60866-2|RS20-HUMAN	0.114851	0.155765	0.368243	0.685973
SNAP25	sp|P60880|SNP25-HUMAN	2.46002e-08	1.51731e-07	0.349125	0.670683
CDC42	sp|P60953-1|CDC42-HUMAN	0.525973	0.586314	0.00535381	0.0674419
DSTN	sp|P60981|DEST-HUMAN	2.76627e-05	8.22565e-05	0.278041	0.605532
SCAMP3	sp|O14828|SCAM3-HUMAN	0.0155882	0.0261105	0.747102	0.915485
GMFB	sp|P60983|GMFB-HUMAN	0.18122	0.233189	0.667827	0.877088
SPCS3	sp|P61009|SPCS3-HUMAN	0.0164936	0.0274082	0.0219596	0.156847
SRP54	sp|P61011|SRP54-HUMAN	0.000398699	0.000931207	0.792006	0.93354
RAB4B	sp|P61018-2|RAB4B-HUMAN	1.39746e-11	3.01075e-10	0.661727	0.87485
RAB2A	sp|P61019|RAB2A-HUMAN	0.158089	0.206684	0.389372	0.703448
RAB5B	sp|P61020|RAB5B-HUMAN	1.62454e-06	6.30734e-06	0.498171	0.784232
CKS1B	sp|P61024|CKS1-HUMAN	5.95281e-12	1.55498e-10	0.980665	0.994142
RAB10	sp|P61026|RAB10-HUMAN	0.00824858	0.0147204	0.631085	0.859234
UBE2D3	sp|P61077-3|UB2D3-HUMAN	0.000218941	0.000537786	0.000166157	0.00671989
UBE2M	sp|P61081|UBC12-HUMAN	0.864323	0.888181	0.988665	0.996278
SLC30A4	sp|O14863|ZNT4-HUMAN	0.20495	0.259543	0.163617	0.464506
UBE2K	sp|P61086|UBE2K-HUMAN	0.00948373	0.0166666	0.0375965	0.213209
UBE2N	sp|P61088|UBE2N-HUMAN	0.0762561	0.108278	0.0339471	0.201495
ACTR3	sp|P61158|ARP3-HUMAN	3.15755e-07	1.4364e-06	0.329436	0.652211
ACTR2	sp|P61160|ARP2-HUMAN	0.00170553	0.00350964	0.249124	0.576184
ACTR1A	sp|P61163|ACTZ-HUMAN	1.89475e-06	7.22859e-06	0.987878	0.996197
ABCE1	sp|P61221|ABCE1-HUMAN	0.000728596	0.00161461	0.288827	0.61511
RAP1B	sp|P61224|RAP1B-HUMAN	0.798606	0.83246	0.653634	0.871918
RAP2B	sp|P61225|RAP2B-HUMAN	0.230832	0.288571	0.291455	0.61821
MAX	sp|P61244|MAX-HUMAN	0.0031243	0.00606636	0.789859	0.932575
RPS3A	sp|P61247|RS3A-HUMAN	0.000612235	0.00137325	0.173302	0.478448
NBAS	sp|A2RRP1|NBAS-HUMAN	2.10129e-07	1.00969e-06	0.285904	0.612956
BACH1	sp|O14867|BACH1-HUMAN	0.866756	0.890215	0.515895	0.795617
RPL26	sp|P61254|RL26-HUMAN	0.0117306	0.0201956	0.703225	0.895394
STX1B	sp|P61266|STX1B-HUMAN	0.00427973	0.00807353	0.17546	0.481748
PSME3	sp|P61289-2|PSME3-HUMAN	6.7338e-05	0.00018486	0.57512	0.83166
PCBD1	sp|P61457|PHS-HUMAN	1.73926e-06	6.69353e-06	0.934092	0.980563
RPL37A	sp|P61513|RL37A-HUMAN	0.0274924	0.0433864	0.603678	0.845448
RHOA	sp|P61586|RHOA-HUMAN	0.353598	0.419414	0.380192	0.695999
RND3	sp|P61587|RND3-HUMAN	0.519411	0.580225	0.000628487	0.0168959
NAA20	sp|P61599|NAA20-HUMAN	5.74001e-05	0.000159616	0.375665	0.692123
HSPE1	sp|P61604|CH10-HUMAN	0.172575	0.223436	0.446862	0.74973
LYZ	sp|P61626|LYSC-HUMAN	0.901586	0.919943	0.0666804	0.292286
BCKDK	sp|O14874|BCKD-HUMAN	0.433773	0.49842	0.704973	0.89564
STXBP1	sp|P61764-2|STXB1-HUMAN	2.19875e-08	1.37549e-07	0.892789	0.966737
DAD1	sp|P61803|DAD1-HUMAN	0.106196	0.145265	0.889679	0.966509
TGFB2	sp|P61812-2|TGFB2-HUMAN	3.30733e-05	9.68464e-05	0.0527824	0.257524
RPL37	sp|P61927|RL37-HUMAN	0.451212	0.515056	0.67658	0.882024
UFM1	sp|P61960|UFM1-HUMAN	0.0352895	0.0542161	0.365677	0.68472
DCAF7	sp|P61962|DCAF7-HUMAN	0.0468719	0.0697894	0.175011	0.48158
WDR5	sp|P61964|WDR5-HUMAN	4.80081e-11	8.01961e-10	0.57897	0.833326
HNRNPK	sp|P61978-3|HNRPK-HUMAN	0.00395311	0.00753296	0.477619	0.770626
USP46	sp|P62068|UBP46-HUMAN	0.138285	0.183472	0.712069	0.899902
RRAS2	sp|P62070-4|RRAS2-HUMAN	0.0635525	0.09191	0.622006	0.854969
IFIT3	sp|O14879|IFIT3-HUMAN	0.564407	0.621347	0.947341	0.98512
TIMM10	sp|P62072|TIM10-HUMAN	0.0183363	0.0301442	0.608961	0.848222
TSPAN5	sp|P62079|TSN5-HUMAN	0.0179099	0.0295064	0.0505138	0.251234
RPS7	sp|P62081|RS7-HUMAN	0.000216504	0.000532512	0.824438	0.944532
PPP1CA	sp|P62136|PP1A-HUMAN	0.318727	0.382481	0.569742	0.828773
PPP1CB	sp|P62140|PP1B-HUMAN	2.53898e-07	1.19205e-06	0.873873	0.960462
PSMC5	sp|P62195|PRS8-HUMAN	0.715025	0.759722	0.0148423	0.12533
RPS16	sp|P62249|RS16-HUMAN	0.0104757	0.0182671	0.13734	0.422463
UBE2G1	sp|P62253|UB2G1-HUMAN	0.048358	0.0718397	0.328505	0.651428
YWHAE	sp|P62258|1433E-HUMAN	0.001683	0.0034718	0.868311	0.959065
RPS14	sp|P62263|RS14-HUMAN	0.219821	0.276305	0.831567	0.947575
GEMIN2	sp|O14893|GEMI2-HUMAN	0.00545555	0.0100732	0.0325158	0.197776
RPS18	sp|P62269|RS18-HUMAN	5.40433e-05	0.000151102	0.127218	0.406897
RPS29	sp|P62273|RS29-HUMAN	0.190261	0.243193	0.851095	0.952449
RPS13	sp|P62277|RS13-HUMAN	0.0257858	0.0410161	0.570328	0.828832
RPS11	sp|P62280|RS11-HUMAN	3.93922e-05	0.000113653	0.817878	0.944216
SNRPE	sp|P62304|RUXE-HUMAN	2.86573e-05	8.48857e-05	0.621102	0.854969
SNRPF	sp|P62306|RUXF-HUMAN	8.11397e-10	8.32246e-09	0.619061	0.854126
LSM3	sp|P62310|LSM3-HUMAN	3.77122e-07	1.68644e-06	0.0571822	0.268896
LSM6	sp|P62312|LSM6-HUMAN	1.1215e-05	3.59919e-05	0.96771	0.991195
SNRPD1	sp|P62314|SMD1-HUMAN	8.86341e-07	3.64206e-06	0.0842679	0.329252
SNRPD2	sp|P62316|SMD2-HUMAN	8.42249e-10	8.59112e-09	0.0974645	0.355969
TAX1BP3	sp|O14907|TX1B3-HUMAN	0.121698	0.163821	0.0216584	0.155539
SNRPD3	sp|P62318|SMD3-HUMAN	3.07543e-10	3.74617e-09	0.102054	0.36418
SELENOT	sp|P62341|SELT-HUMAN	0.115115	0.156077	0.0759565	0.311126
TBPL1	sp|P62380|TBPL1-HUMAN	9.83685e-08	5.17136e-07	0.900842	0.969948
RPL7A	sp|P62424|RL7A-HUMAN	0.00106044	0.00227349	0.898799	0.969563
POLR2G	sp|P62487|RPB7-HUMAN	2.92495e-12	8.99033e-11	0.0755423	0.310417
ETF1	sp|P62495|ERF1-HUMAN	4.49864e-05	0.000128268	3.80227e-05	0.00246907
CNBP	sp|P62633-4|CNBP-HUMAN	1.13584e-09	1.0933e-08	0.102155	0.364258
CNBP	sp|P62633-6|CNBP-HUMAN	8.10645e-10	8.32246e-09	0.395012	0.706571
YPEL5	sp|P62699|YPEL5-HUMAN	0.002667	0.00524582	0.0866342	0.333829
ACTA2	sp|P62736|ACTA-HUMAN	4.28282e-08	2.46362e-07	0.865942	0.958353
LIN7A	sp|O14910|LIN7A-HUMAN	0.0740699	0.105499	0.127282	0.406897
RHOB	sp|P62745|RHOB-HUMAN	0.518606	0.579541	0.10825	0.374127
RPL23A	sp|P62750|RL23A-HUMAN	0.229742	0.287403	0.356297	0.677964
VSNL1	sp|P62760|VISL1-HUMAN	0.00122067	0.00258933	6.08488e-10	4.5119e-07
HIST1H4A	sp|P62805|H4-HUMAN	6.21259e-06	2.10689e-05	0.882507	0.963895
RAB1A	sp|P62820|RAB1A-HUMAN	1.74946e-07	8.57166e-07	0.089089	0.339395
RPL23	sp|P62829|RL23-HUMAN	5.28455e-06	1.81892e-05	0.134801	0.418519
RPS24	sp|P62847-4|RS24-HUMAN	0.0113058	0.0195336	0.232855	0.555827
RPS25	sp|P62851|RS25-HUMAN	0.006338	0.0115249	0.0688316	0.296034
RPS26	sp|P62854|RS26-HUMAN	0.12886	0.17233	0.4002	0.710854
POLR2L	sp|P62875|RPAB5-HUMAN	2.76397e-06	1.01905e-05	0.401552	0.712196
IKBKB	sp|O14920|IKKB-HUMAN	1.18648e-08	8.08017e-08	0.496984	0.78417
GNB2	sp|P62879|GBB2-HUMAN	0.0021784	0.00436865	0.00378393	0.055121
RPL39	sp|P62891|RL39-HUMAN	0.492635	0.5556	0.848889	0.952084
RPL10A	sp|P62906|RL10A-HUMAN	0.134781	0.179338	0.685159	0.885247
RPL11	sp|P62913|RL11-HUMAN	0.0142446	0.0241141	0.0593308	0.274368
RPL8	sp|P62917|RL8-HUMAN	0.108523	0.148118	0.549202	0.816805
PPIA	sp|P62937-2|PPIA-HUMAN	0.0848897	0.119143	0.486399	0.776758
RPS27A	sp|P62979|RS27A-HUMAN	0.0246424	0.0393876	0.633682	0.861191
TRA2B	sp|P62995|TRA2B-HUMAN	1.18903e-10	1.69874e-09	0.574256	0.831598
RAC1	sp|P63000-2|RAC1-HUMAN	0.31618	0.379869	0.830857	0.947445
GNAS	sp|P63092-3|GNAS2-HUMAN	0.323707	0.38775	0.605814	0.846217
RGS12	sp|O14924|RGS12-HUMAN	0.210544	0.265877	0.559177	0.822832
GNAI1	sp|P63096|GNAI1-HUMAN	0.0490684	0.0727895	0.00835391	0.0896756
UBE2B	sp|P63146|UBE2B-HUMAN	0.00583058	0.0106929	0.0247547	0.168336
PPP2R2A	sp|P63151-2|2ABA-HUMAN	8.90744e-06	2.93132e-05	0.0468639	0.239807
DYNLL1	sp|P63167|DYL1-HUMAN	0.384867	0.450821	0.0150652	0.126633
DYNLT1	sp|P63172|DYLT1-HUMAN	0.0015669	0.00325193	0.390108	0.703826
RPL38	sp|P63173|RL38-HUMAN	0.523407	0.583983	0.443637	0.747583
GNG5	sp|P63218|GBG5-HUMAN	0.0313192	0.0487252	0.218718	0.539576
KCNJ2	sp|P63252|KCNJ2-HUMAN	3.65466e-15	6.47359e-13	0.243828	0.569342
SUPT4H1	sp|P63272|SPT4H-HUMAN	1.18008e-05	3.77046e-05	0.642369	0.865597
SEC11A	sp|P67812-3|SC11A-HUMAN	0.15046	0.197888	0.0131367	0.117006
HAT1	sp|O14929|HAT1-HUMAN	3.73886e-11	6.48045e-10	0.050074	0.249985
TPM4	sp|P67936-2|TPM4-HUMAN	0.00928832	0.0163459	0.991043	0.997028
TPM4	sp|P67936|TPM4-HUMAN	0.0552979	0.0811428	0.654057	0.871918
UBE2L3	sp|P68036-3|UB2L3-HUMAN	0.482178	0.545609	0.878401	0.96185
TUBA4A	sp|P68366|TBA4A-HUMAN	3.42518e-08	2.01941e-07	0.113379	0.38114
UBXN2A	sp|P68543|UBX2A-HUMAN	0.000423399	0.000981439	0.0894119	0.339765
CXADR	sp|P78310|CXAR-HUMAN	0.000834786	0.00182666	0.413871	0.722101
SH3BP2	sp|P78314-4|3BP2-HUMAN	0.0332917	0.0514985	0.023496	0.162777
IGBP1	sp|P78318|IGBP1-HUMAN	0.00093884	0.00203171	0.848848	0.952084
SIRPA	sp|P78324|SHPS1-HUMAN	0.00104267	0.0022401	0.0448068	0.234769
RBM6	sp|P78332|RBM6-HUMAN	3.0086e-07	1.37747e-06	0.207905	0.52805
UBE2L6	sp|O14933|UB2L6-HUMAN	0.00221613	0.00443755	0.647577	0.869185
RPP38	sp|P78345|RPP38-HUMAN	8.413e-05	0.000225447	0.715134	0.90072
RPP30	sp|P78346-2|RPP30-HUMAN	1.40679e-06	5.53177e-06	0.565705	0.826813
DLG4	sp|P78352-2|DLG4-HUMAN	0.379766	0.445653	0.976229	0.993162
PIP4K2B	sp|P78356|PI42B-HUMAN	0.00255989	0.00505563	0.0141607	0.122377
CNTNAP1	sp|P78357|CNTP1-HUMAN	0.0134068	0.0228047	0.00309737	0.0497576
SRPK2	sp|P78362-2|SRPK2-HUMAN	0.390119	0.455815	0.446783	0.74973
SLC35A2	sp|P78381-4|S35A2-HUMAN	0.814225	0.844826	0.728745	0.906161
SLC35A1	sp|P78382|S35A1-HUMAN	5.44718e-05	0.000152207	0.254299	0.581804
RAE1	sp|P78406|RAE1L-HUMAN	2.30309e-07	1.09751e-06	0.25418	0.581731
BTN3A2	sp|P78410|BT3A2-HUMAN	0.685521	0.733062	0.114361	0.383182
TARSL2	sp|A2RTX5|SYTC2-HUMAN	0.022247	0.0359012	0.60365	0.845448
CASK	sp|O14936-4|CSKP-HUMAN	0.00017894	0.000446794	0.00411361	0.0576469
ST5	sp|P78524|ST5-HUMAN	0.356897	0.422838	0.00928679	0.0947273
PRKDC	sp|P78527|PRKDC-HUMAN	2.62189e-13	1.56592e-11	0.661878	0.87485
BLOC1S1	sp|P78537|BL1S1-HUMAN	4.12655e-06	1.46125e-05	0.287594	0.61401
SRPX	sp|P78539|SRPX-HUMAN	0.529053	0.589108	0.436809	0.742181
ARG2	sp|P78540|ARGI2-HUMAN	0.00708791	0.0127926	0.944802	0.983854
IL13RA1	sp|P78552|I13R1-HUMAN	2.21346e-05	6.7073e-05	0.00742175	0.083765
ADARB1	sp|P78563-5|RED1-HUMAN	0.0883722	0.123429	0.237487	0.561125
IFI35	sp|P80217-2|IN35-HUMAN	0.37602	0.441861	0.0339713	0.201495
BASP1	sp|P80723|BASP1-HUMAN	0.000132012	0.000339455	0.0964512	0.354192
GPSM2	sp|P81274|GPSM2-HUMAN	0.0494041	0.073205	0.707249	0.897049
PLD2	sp|O14939|PLD2-HUMAN	0.0358025	0.0549218	0.00639665	0.0759119
FAM189B	sp|P81408-4|F189B-HUMAN	0.180182	0.232014	0.00193402	0.0367502
MRPS22	sp|P82650|RT22-HUMAN	0.00482293	0.0089952	0.123901	0.401578
MRPS25	sp|P82663|RT25-HUMAN	0.0467151	0.0695784	0.0352558	0.206016
MRPS35	sp|P82673|RT35-HUMAN	0.00785423	0.014082	0.899718	0.969715
MRPS5	sp|P82675|RT05-HUMAN	1.25317e-05	3.99155e-05	0.00447696	0.0610681
MRPS36	sp|P82909|RT36-HUMAN	4.18907e-06	1.47941e-05	0.331077	0.653858
MRPS11	sp|P82912|RT11-HUMAN	0.313546	0.377294	0.398897	0.709404
MRPS15	sp|P82914|RT15-HUMAN	0.0437951	0.0657819	0.396381	0.706832
MRPS6	sp|P82932|RT06-HUMAN	0.0418116	0.06308	0.58901	0.839258
MRPS9	sp|P82933|RT09-HUMAN	0.000277273	0.000670004	0.317581	0.642196
EREG	sp|O14944|EREG-HUMAN	0.833214	0.86162	0.000494701	0.0142013
LACTB	sp|P83111|LACTB-HUMAN	5.4129e-15	8.60558e-13	0.926777	0.977557
COG7	sp|P83436|COG7-HUMAN	0.242931	0.302059	0.0916022	0.344656
TXNL4A	sp|P83876|TXN4A-HUMAN	0.0256634	0.0408356	0.415809	0.723571
SMAD3	sp|P84022|SMAD3-HUMAN	0.00184919	0.00377665	0.298843	0.623163
ARF1	sp|P84077|ARF1-HUMAN	0.509542	0.571731	0.996949	0.999142
ERH	sp|P84090|ERH-HUMAN	0.000661423	0.00147568	0.991464	0.997028
RPL19	sp|P84098|RL19-HUMAN	0.555485	0.613575	0.684856	0.885081
SERF2	sp|P84101|SERF2-HUMAN	0.327697	0.391868	0.363879	0.683773
SRSF3	sp|P84103|SRSF3-HUMAN	4.78985e-06	1.66795e-05	0.570769	0.829221
MXRA7	sp|P84157-2|MXRA7-HUMAN	3.79044e-05	0.000109773	0.00228119	0.0412224
UQCRQ	sp|O14949|QCR8-HUMAN	0.0803955	0.113405	0.472916	0.766942
MXRA7	sp|P84157-3|MXRA7-HUMAN	0.00659607	0.0119611	0.80978	0.941692
MXRA7	sp|P84157|MXRA7-HUMAN	7.2664e-05	0.000197826	0.018571	0.14256
FOXK1	sp|P85037|FOXK1-HUMAN	0.6944	0.740945	0.496954	0.78417
RPP14	sp|P86397|HTD2-HUMAN	0.152451	0.200107	0.78761	0.931862
CCZ1B	sp|P86790|CCZ1B-HUMAN	0.0253723	0.0404281	0.180452	0.490986
DAB2	sp|P98082|DAB2-HUMAN	0.0640667	0.0925809	0.792232	0.933688
VLDLR	sp|P98155|VLDLR-HUMAN	0.0193385	0.0316226	0.977998	0.99349
HSPG2	sp|P98160|PGBM-HUMAN	0.110273	0.150219	0.0146711	0.124684
XIAP	sp|P98170|XIAP-HUMAN	0.372552	0.438232	0.32418	0.647139
EFNB1	sp|P98172|EFNB1-HUMAN	0.000355566	0.000839179	0.410043	0.719174
RAB29	sp|O14966|RAB7L-HUMAN	9.49253e-06	3.10172e-05	0.0465434	0.23883
RBM3	sp|P98179|RBM3-HUMAN	7.11497e-08	3.86607e-07	0.0422305	0.227458
ATP2C1	sp|P98194-7|AT2C1-HUMAN	0.326655	0.390723	0.0734367	0.30618
ATP8B2	sp|P98198-3|AT8B2-HUMAN	0.00916008	0.0161563	0.296391	0.620494
CYCS	sp|P99999|CYC-HUMAN	0.000207572	0.000512729	0.43851	0.743275
GTF2B	sp|Q00403|TF2B-HUMAN	9.6822e-09	6.75337e-08	0.29169	0.61821
CDK6	sp|Q00534|CDK6-HUMAN	0.00161971	0.00334949	0.640474	0.864604
PURA	sp|Q00577|PURA-HUMAN	0.00767324	0.0137736	0.000442564	0.0131641
CDC42EP1	sp|Q00587|BORG5-HUMAN	0.592231	0.648031	0.247923	0.574252
HSF1	sp|Q00613|HSF1-HUMAN	6.45031e-09	4.7921e-08	0.154898	0.451286
NFKB2	sp|Q00653|NFKB2-HUMAN	0.00725865	0.0130778	5.99772e-05	0.00323421
CLGN	sp|O14967|CLGN-HUMAN	9.43882e-05	0.000250102	0.4272	0.73297
REEP5	sp|Q00765|REEP5-HUMAN	2.69031e-08	1.6407e-07	0.676872	0.882024
HNRNPU	sp|Q00839-2|HNRPU-HUMAN	0.0377792	0.0576568	0.669351	0.878339
HNRNPU	sp|Q00839|HNRPU-HUMAN	6.23537e-08	3.43878e-07	0.722216	0.90359
B4GALNT1	sp|Q00973|B4GN1-HUMAN	0.153071	0.20075	0.160787	0.460584
IRF9	sp|Q00978|IRF9-HUMAN	0.0186923	0.0306693	0.927493	0.977977
SPTBN1	sp|Q01082-3|SPTB2-HUMAN	0.0579223	0.0845097	0.0971362	0.355857
TIAL1	sp|Q01085-2|TIAR-HUMAN	1.40213e-07	7.08141e-07	0.0085078	0.0910098
TIAL1	sp|Q01085|TIAR-HUMAN	0.747004	0.786968	0.981459	0.99451
SET	sp|Q01105-2|SET-HUMAN	1.93259e-05	5.92631e-05	0.0651727	0.288783
SRSF2	sp|Q01130|SRSF2-HUMAN	0.0403883	0.0612132	0.842667	0.950051
DSCR3	sp|O14972|DSCR3-HUMAN	0.000219614	0.000539153	0.124888	0.403009
FOXK2	sp|Q01167|FOXK2-HUMAN	1.79241e-06	6.86656e-06	0.132666	0.415622
RUNX1	sp|Q01196-8|RUNX1-HUMAN	6.27567e-12	1.62551e-10	0.758929	0.920551
RELB	sp|Q01201|RELB-HUMAN	0.98926	0.991199	0.0138409	0.120973
GALK2	sp|Q01415|GALK2-HUMAN	9.9945e-05	0.000263463	0.0912557	0.344159
AMPD3	sp|Q01432-4|AMPD3-HUMAN	1.54201e-09	1.4276e-08	0.658043	0.873797
ANK2	sp|Q01484|ANK2-HUMAN	2.0278e-09	1.79792e-08	0.294268	0.619264
FLI1	sp|Q01543|FLI1-HUMAN	0.0116057	0.0199992	0.753997	0.918078
HMGCS1	sp|Q01581|HMCS1-HUMAN	1.44568e-10	1.98373e-09	0.000388122	0.0118899
IFITM3	sp|Q01628|IFM3-HUMAN	0.198852	0.25253	0.122913	0.399021
SLC7A5	sp|Q01650|LAT1-HUMAN	0.000205705	0.000508692	0.0416631	0.225587
PPP1R12A	sp|O14974|MYPT1-HUMAN	1.69509e-08	1.09764e-07	0.00304557	0.0490108
DR1	sp|Q01658|NC2B-HUMAN	0.00886434	0.0157008	0.0791821	0.317451
TFAP4	sp|Q01664|TFAP4-HUMAN	0.000546649	0.00123636	0.742624	0.913651
EXOSC10	sp|Q01780|EXOSX-HUMAN	4.17581e-11	7.1174e-10	0.293568	0.619264
OTUD4	sp|Q01804|OTUD4-HUMAN	0.00505661	0.00939113	0.0495986	0.249266
PFKP	sp|Q01813|PFKAP-HUMAN	0.0478351	0.0710973	0.225902	0.547305
EWSR1	sp|Q01844-5|EWS-HUMAN	1.16297e-06	4.64433e-06	0.69472	0.890342
CDR2	sp|Q01850|CDR2-HUMAN	0.542566	0.601828	0.000421259	0.0127358
OCRL	sp|Q01968|OCRL-HUMAN	0.000217213	0.000533969	0.631789	0.859758
PLCB3	sp|Q01970|PLCB3-HUMAN	0.010447	0.0182308	3.37271e-05	0.00220566
AKAP17A	sp|Q02040|AK17A-HUMAN	0.000851102	0.00185919	0.156368	0.453418
GAK	sp|O14976|GAK-HUMAN	1.81596e-05	5.60594e-05	0.930635	0.979194
MEF2A	sp|Q02078|MEF2A-HUMAN	4.98591e-09	3.84086e-08	0.0781458	0.315906
NAAA	sp|Q02083|NAAA-HUMAN	1.1221e-07	5.81613e-07	0.566523	0.827092
SP2	sp|Q02086|SP2-HUMAN	0.014785	0.024944	0.470718	0.765113
DHODH	sp|Q02127|PYRD-HUMAN	0.136742	0.181685	0.459623	0.758308
PRKCE	sp|Q02156|KPCE-HUMAN	0.467902	0.530888	0.656009	0.873133
OGDH	sp|Q02218|ODO1-HUMAN	1.33965e-09	1.25922e-08	2.53319e-05	0.00185385
CENPE	sp|Q02224|CENPE-HUMAN	2.46119e-10	3.11312e-09	0.091665	0.344656
KIF23	sp|Q02241|KIF23-HUMAN	4.34576e-13	2.23364e-11	0.710992	0.899109
ALDH6A1	sp|Q02252|MMSA-HUMAN	1.09001e-13	8.71897e-12	0.233391	0.556529
CYP27A1	sp|Q02318|CP27A-HUMAN	1.11443e-07	5.78523e-07	0.909659	0.972856
HNRNPDL	sp|O14979|HNRDL-HUMAN	1.64499e-11	3.37827e-10	0.522634	0.800267
BDH1	sp|Q02338|BDH-HUMAN	0.888773	0.909486	0.0663102	0.291837
COL7A1	sp|Q02388|CO7A1-HUMAN	0.21534	0.271041	0.0237145	0.163554
APBA1	sp|Q02410|APBA1-HUMAN	0.242453	0.301545	0.00375441	0.0550388
SP4	sp|Q02446|SP4-HUMAN	0.467208	0.530165	0.0251898	0.170539
SP3	sp|Q02447|SP3-HUMAN	5.94793e-08	3.29727e-07	0.107413	0.373471
HIST1H1A	sp|Q02539|H11-HUMAN	1.62964e-11	3.35422e-10	0.607984	0.847514
RPL18A	sp|Q02543|RL18A-HUMAN	0.00762665	0.0136926	0.221847	0.542613
FKBP4	sp|Q02790|FKBP4-HUMAN	0.245602	0.304969	0.0880748	0.336987
PLOD1	sp|Q02809-2|PLOD1-HUMAN	3.29994e-12	9.91165e-11	0.113113	0.380385
RASSF7	sp|Q02833|RASF7-HUMAN	0.0201427	0.0328097	0.0123363	0.112687
RBM47	sp|A0AV96|RBM47-HUMAN	0.0418115	0.06308	0.718726	0.902226
FAM234B	sp|A2RU67|F234B-HUMAN	0.495067	0.558002	0.923341	0.977098
XPO1	sp|O14980|XPO1-HUMAN	3.82933e-10	4.47046e-09	0.268109	0.594913
TOP2B	sp|Q02880|TOP2B-HUMAN	1.06385e-07	5.55165e-07	0.918816	0.975153
AKAP12	sp|Q02952|AKA12-HUMAN	0.515359	0.576714	0.0957572	0.353425
SLC25A11	sp|Q02978|M2OM-HUMAN	0.000679803	0.00151266	0.370006	0.687238
DST	sp|Q03001-13|DYST-HUMAN	0.00176052	0.00361473	0.683844	0.88488
DST	sp|Q03001|DYST-HUMAN	6.37957e-05	0.000176126	1.05212e-08	5.38979e-06
HHEX	sp|Q03014|HHEX-HUMAN	0.0112943	0.0195193	0.735023	0.909385
MLLT1	sp|Q03111|ENL-HUMAN	6.28855e-07	2.67058e-06	0.0610889	0.278448
MECOM	sp|Q03112-3|EVI1-HUMAN	0.00151087	0.00314699	0.809805	0.941692
GNA12	sp|Q03113|GNA12-HUMAN	0.403169	0.468333	0.0276758	0.180752
KMT2A	sp|Q03164-3|KMT2A-HUMAN	3.74177e-07	1.67489e-06	0.221197	0.541727
BTAF1	sp|O14981|BTAF1-HUMAN	1.68903e-08	1.09526e-07	0.733402	0.908599
TGFBR3	sp|Q03167|TGBR3-HUMAN	0.807197	0.839613	0.122813	0.399021
TNFAIP2	sp|Q03169|TNAP2-HUMAN	1.85283e-05	5.70258e-05	0.10083	0.361509
PPARD	sp|Q03181|PPARD-HUMAN	0.209076	0.264239	0.724726	0.904429
CENPC	sp|Q03188|CENPC-HUMAN	3.74645e-08	2.192e-07	0.815612	0.944107
LMNB2	sp|Q03252|LMNB2-HUMAN	0.00136508	0.00286532	0.541507	0.813104
PTS	sp|Q03393|PTPS-HUMAN	0.0580473	0.0846787	0.837587	0.949365
PLAUR	sp|Q03405-2|UPAR-HUMAN	0.184393	0.236743	0.380324	0.696078
PLAUR	sp|Q03405|UPAR-HUMAN	4.94692e-13	2.41352e-11	0.00943374	0.095697
MVK	sp|Q03426|KIME-HUMAN	1.25607e-06	4.99882e-06	0.157769	0.455968
ERCC6	sp|Q03468|ERCC6-HUMAN	0.799126	0.832908	0.618642	0.854031
ARHGEF10	sp|O15013|ARHGA-HUMAN	0.109947	0.149841	0.765294	0.921951
CEBPZ	sp|Q03701|CEBPZ-HUMAN	2.28346e-14	2.66529e-12	0.760767	0.921048
HSF2	sp|Q03933|HSF2-HUMAN	3.38273e-05	9.89284e-05	0.995555	0.998479
RELA	sp|Q04206|TF65-HUMAN	0.075404	0.107167	0.381714	0.696987
GBE1	sp|Q04446|GLGB-HUMAN	0.62322	0.676243	0.577137	0.832439
ATP7A	sp|Q04656-3|ATP7A-HUMAN	0.000375144	0.000881326	0.4276	0.73297
NOTCH2	sp|Q04721|NOTC2-HUMAN	2.92848e-06	1.07199e-05	0.081884	0.323918
TLE1	sp|Q04724|TLE1-HUMAN	2.23752e-09	1.95566e-08	0.808923	0.94149
TLE4	sp|Q04727-3|TLE4-HUMAN	1.94769e-08	1.23265e-07	0.210344	0.531468
GLO1	sp|Q04760|LGUL-HUMAN	0.337738	0.402778	0.00462063	0.0621997
ACVR1	sp|Q04771|ACVR1-HUMAN	0.0147444	0.024887	0.0882769	0.33734
ZNF609	sp|O15014|ZN609-HUMAN	0.00139838	0.00292855	0.109195	0.375845
AKR1C1	sp|Q04828|AK1C1-HUMAN	1.74626e-09	1.58956e-08	0.621151	0.854969
REL	sp|Q04864|REL-HUMAN	0.0723266	0.103255	0.910898	0.973336
CD164	sp|Q04900|MUC24-HUMAN	0.0743885	0.105903	0.251434	0.57904
CSTF1	sp|Q05048|CSTF1-HUMAN	8.20801e-06	2.71568e-05	0.378722	0.694825
UBE3A	sp|Q05086|UBE3A-HUMAN	0.0130123	0.0221828	0.745339	0.914717
PTPN12	sp|Q05209|PTN12-HUMAN	0.0241718	0.0387094	0.379126	0.695014
SRSF11	sp|Q05519|SRS11-HUMAN	2.52915e-09	2.16953e-08	0.913822	0.973708
EEF1A2	sp|Q05639|EF1A2-HUMAN	0.0158962	0.0265541	0.281565	0.609463
CALD1	sp|Q05682-2|CALD1-HUMAN	0.00241096	0.00478921	0.592303	0.840382
CALD1	sp|Q05682-4|CALD1-HUMAN	1.58271e-07	7.84633e-07	0.959656	0.989082
ZNF646	sp|O15015-2|ZN646-HUMAN	0.0799738	0.112879	0.628009	0.85802
CALD1	sp|Q05682|CALD1-HUMAN	1.00471e-08	6.9553e-08	0.252779	0.580363
COL14A1	sp|Q05707|COEA1-HUMAN	0.0002208	0.000541777	0.776581	0.927379
RNASEL	sp|Q05823|RN5A-HUMAN	0.0238894	0.0383103	0.0187934	0.143118
FPGS	sp|Q05932|FOLC-HUMAN	0.0450823	0.0674405	0.124076	0.402004
CTDSPL2	sp|Q05D32|CTSL2-HUMAN	3.68015e-10	4.3119e-09	0.938627	0.982501
ITIH3	sp|Q06033|ITIH3-HUMAN	0.170575	0.221219	0.0122548	0.112687
PTPN11	sp|Q06124|PTN11-HUMAN	3.81151e-07	1.70033e-06	0.854643	0.954075
GFPT1	sp|Q06210|GFPT1-HUMAN	3.9678e-06	1.41154e-05	0.216234	0.537073
EXOSC9	sp|Q06265-2|EXOS9-HUMAN	1.96855e-11	3.85392e-10	0.479846	0.772866
AOX1	sp|Q06278|AOXA-HUMAN	9.03214e-05	0.000240362	0.00405941	0.0572352
SPTBN2	sp|O15020|SPTN2-HUMAN	0.000419834	0.000974399	0.0313174	0.193235
PSME1	sp|Q06323|PSME1-HUMAN	0.000473516	0.00108614	0.253624	0.581197
RBPJ	sp|Q06330|SUH-HUMAN	2.7796e-11	5.04541e-10	0.785685	0.931328
APLP2	sp|Q06481|APLP2-HUMAN	0.00168764	0.00348059	0.149957	0.443903
GABPB1	sp|Q06547|GABP1-HUMAN	0.152898	0.200551	0.239301	0.562906
RING1	sp|Q06587|RING1-HUMAN	1.88865e-10	2.46326e-09	0.789521	0.932575
FMR1	sp|Q06787-5|FMR1-HUMAN	0.267696	0.328685	0.856442	0.955044
FMR1	sp|Q06787-7|FMR1-HUMAN	0.01561	0.0261329	0.451963	0.75258
PRDX1	sp|Q06830|PRDX1-HUMAN	2.28383e-12	7.49436e-11	0.452289	0.75258
C1QBP	sp|Q07021|C1QBP-HUMAN	0.0168674	0.0279586	0.00792376	0.0873339
COL16A1	sp|Q07092|COGA1-HUMAN	0.000632453	0.00141515	0.0038142	0.055249
MAST4	sp|O15021|MAST4-HUMAN	0.0910688	0.126716	0.411433	0.719891
PDE4B	sp|Q07343|PDE4B-HUMAN	0.694245	0.740945	0.118906	0.392061
KHDRBS1	sp|Q07666|KHDR1-HUMAN	2.64556e-09	2.24422e-08	0.559965	0.823383
BAX	sp|Q07812-2|BAX-HUMAN	3.40101e-06	1.22887e-05	0.982879	0.995045
MCL1	sp|Q07820|MCL1-HUMAN	0.0412139	0.0623107	0.391622	0.705005
KLC1	sp|Q07866-10|KLC1-HUMAN	4.61765e-08	2.63323e-07	0.119927	0.393626
KLC1	sp|Q07866-3|KLC1-HUMAN	0.00206384	0.00416974	0.512381	0.793193
KLC1	sp|Q07866-8|KLC1-HUMAN	0.0442919	0.0664307	0.0160547	0.131475
KLC1	sp|Q07866-9|KLC1-HUMAN	0.778261	0.815309	0.819189	0.944216
SOS1	sp|Q07889|SOS1-HUMAN	2.30654e-05	6.96647e-05	0.390634	0.704624
LRP1	sp|Q07954|LRP1-HUMAN	0.00644497	0.0117032	0.827382	0.945623
PLXNB2	sp|O15031|PLXB2-HUMAN	4.25598e-06	1.50017e-05	0.0856583	0.3323
ARHGAP1	sp|Q07960|RHG01-HUMAN	3.09844e-11	5.54771e-10	0.0756365	0.310443
DHX9	sp|Q08211|DHX9-HUMAN	1.04823e-12	4.14836e-11	0.895904	0.967942
CRYZ	sp|Q08257|QOR-HUMAN	2.69698e-08	1.64259e-07	0.492307	0.780934
CACNB2	sp|Q08289|CACB2-HUMAN	0.0416945	0.0629446	0.507722	0.790161
IL10RB	sp|Q08334|I10R2-HUMAN	0.824862	0.854613	0.348686	0.670418
GOLGA3	sp|Q08378|GOGA3-HUMAN	0.490187	0.553042	0.635144	0.861659
GOLGA2	sp|Q08379|GOGA2-HUMAN	0.265543	0.326346	0.0453866	0.235709
LOXL1	sp|Q08397|LOXL1-HUMAN	0.181685	0.233656	0.257647	0.584105
EHHADH	sp|Q08426|ECHP-HUMAN	1.44949e-10	1.98599e-09	0.292383	0.618647
PUDP	sp|Q08623-4|HDHD1-HUMAN	1.78381e-06	6.84215e-06	0.00436325	0.0601398
AREL1	sp|O15033|AREL1-HUMAN	0.715331	0.759916	0.82023	0.944216
CD47	sp|Q08722|CD47-HUMAN	0.0115277	0.0198872	0.992054	0.997028
PPID	sp|Q08752|PPID-HUMAN	1.66322e-07	8.19261e-07	0.0185779	0.14256
SSRP1	sp|Q08945|SSRP1-HUMAN	2.31856e-14	2.67243e-12	0.177359	0.485147
RBL2	sp|Q08999|RBL2-HUMAN	0.419588	0.484779	0.126635	0.406058
CAMSAP2	sp|Q08AD1|CAMP2-HUMAN	0.95069	0.959851	7.99499e-05	0.00414167
SPIRE1	sp|Q08AE8-2|SPIR1-HUMAN	0.348671	0.414104	0.0063115	0.0753864
SLFN5	sp|Q08AF3|SLFN5-HUMAN	7.15851e-10	7.57848e-09	0.622876	0.855711
VAC14	sp|Q08AM6|VAC14-HUMAN	0.000151197	0.000384678	0.206953	0.527478
NSUN2	sp|Q08J23|NSUN2-HUMAN	1.73943e-12	5.97218e-11	0.695917	0.890886
DMWD	sp|Q09019|DMWD-HUMAN	0.00344432	0.00664298	0.805619	0.940185
TECPR2	sp|O15040|TCPR2-HUMAN	4.51737e-05	0.000128763	0.212323	0.53347
RBBP4	sp|Q09028|RBBP4-HUMAN	1.35526e-09	1.26743e-08	0.981835	0.994671
MGAT5	sp|Q09328|MGT5A-HUMAN	1.62972e-05	5.07005e-05	0.000640856	0.0170298
EP300	sp|Q09472|EP300-HUMAN	0.000363057	0.000856201	0.768221	0.923904
AHNAK	sp|Q09666|AHNK-HUMAN	0.0719766	0.102787	0.00277671	0.0464712
TBC1D8B	sp|Q0IIM8|TBC8B-HUMAN	0.0197534	0.0322326	0.446336	0.749528
FCHO2	sp|Q0JRZ9|FCHO2-HUMAN	0.744405	0.785193	0.0686617	0.295855
ELP6	sp|Q0PNE2|ELP6-HUMAN	0.0431952	0.0649654	0.782552	0.930023
SMAGP	sp|Q0VAQ4|SMAGP-HUMAN	0.0909593	0.126582	0.584492	0.837415
HSPA14	sp|Q0VDF9|HSP7E-HUMAN	2.43065e-09	2.10056e-08	0.423343	0.728837
NEXN	sp|Q0ZGT2|NEXN-HUMAN	7.35012e-12	1.81096e-10	0.000105248	0.00510785
TYW5	sp|A2RUC4|TYW5-HUMAN	0.256012	0.315685	0.223292	0.54427
U2SURP	sp|O15042|SR140-HUMAN	1.47721e-09	1.37173e-08	0.708874	0.898034
GALNT1	sp|Q10472|GALT1-HUMAN	0.594046	0.649555	0.0937082	0.348984
AP1B1	sp|Q10567|AP1B1-HUMAN	5.96156e-06	2.03448e-05	0.0324573	0.197551
CPSF1	sp|Q10570|CPSF1-HUMAN	6.77286e-11	1.07491e-09	0.0586901	0.272636
PMPCA	sp|Q10713|MPPA-HUMAN	0.0906061	0.12611	2.20968e-05	0.00173781
ST3GAL1	sp|Q11201|SIA4A-HUMAN	0.0417134	0.0629627	0.15197	0.447132
ST3GAL4	sp|Q11206-4|SIA4C-HUMAN	0.0443373	0.0664771	0.3545	0.675984
SCRN1	sp|Q12765-2|SCRN1-HUMAN	0.000314937	0.000750589	0.216356	0.537073
HMGXB3	sp|Q12766|HMGX3-HUMAN	0.0370494	0.0566555	0.296506	0.620494
TMEM94	sp|Q12767-2|TMM94-HUMAN	0.0941358	0.130569	0.0790007	0.316984
WASHC5	sp|Q12768|WASC5-HUMAN	0.701734	0.748143	0.47333	0.766942
SETD1A	sp|O15047|SET1A-HUMAN	1.22918e-10	1.74642e-09	0.738217	0.911014
NUP160	sp|Q12769|NU160-HUMAN	5.41872e-09	4.13626e-08	0.987876	0.996197
SCAP	sp|Q12770|SCAP-HUMAN	0.0501389	0.0741867	0.658443	0.873797
TBL3	sp|Q12788|TBL3-HUMAN	2.58789e-15	5.1876e-13	0.133839	0.417266
GTF3C1	sp|Q12789|TF3C1-HUMAN	6.95157e-11	1.09449e-09	0.481893	0.77373
TWF1	sp|Q12792|TWF1-HUMAN	0.0869334	0.121678	0.0862485	0.333108
ASPH	sp|Q12797|ASPH-HUMAN	2.66711e-10	3.32343e-09	0.846696	0.951327
AKAP13	sp|Q12802-2|AKP13-HUMAN	6.19624e-06	2.10289e-05	0.925587	0.977309
TRO	sp|Q12816|TROP-HUMAN	0.0117961	0.0203046	0.236311	0.559441
SMARCB1	sp|Q12824|SNF5-HUMAN	2.49056e-09	2.1423e-08	0.0332709	0.199604
BPTF	sp|Q12830|BPTF-HUMAN	2.03514e-07	9.82514e-07	0.024717	0.168203
TRANK1	sp|O15050|TRNK1-HUMAN	0.435532	0.500068	0.126672	0.406058
CDC20	sp|Q12834|CDC20-HUMAN	5.611e-09	4.25136e-08	0.751571	0.916731
FSTL1	sp|Q12841|FSTL1-HUMAN	8.69937e-09	6.16579e-08	0.592972	0.840655
STX4	sp|Q12846|STX4-HUMAN	0.574143	0.630558	0.665995	0.875929
GRSF1	sp|Q12849|GRSF1-HUMAN	3.54842e-08	2.08674e-07	0.029756	0.188319
MAP4K2	sp|Q12851|M4K2-HUMAN	4.94286e-06	1.71411e-05	0.936107	0.981103
SFSWAP	sp|Q12872-2|SFSWA-HUMAN	3.21968e-08	1.91664e-07	0.682365	0.884418
CHD3	sp|Q12873-3|CHD3-HUMAN	1.20168e-09	1.14588e-08	0.405952	0.715871
SF3A3	sp|Q12874|SF3A3-HUMAN	0.00023373	0.000571222	0.268563	0.595437
DPYD	sp|Q12882|DPYD-HUMAN	0.260591	0.320559	0.893358	0.966974
FAP	sp|Q12884|SEPR-HUMAN	6.29258e-09	4.68312e-08	0.647173	0.868897
SYNJ2	sp|O15056|SYNJ2-HUMAN	0.00728134	0.0131161	0.5545	0.820193
COX10	sp|Q12887|COX10-HUMAN	0.751686	0.791303	0.887003	0.965992
TP53BP1	sp|Q12888-2|TP53B-HUMAN	0.471416	0.534546	0.0227305	0.160131
IFRD2	sp|Q12894-2|IFRD2-HUMAN	1.82936e-07	8.92043e-07	0.821452	0.944465
TRIM26	sp|Q12899|TRI26-HUMAN	0.934493	0.946295	0.0430942	0.229828
AIMP1	sp|Q12904-2|AIMP1-HUMAN	0.548123	0.606897	0.606698	0.846861
ILF3	sp|Q12906-7|ILF3-HUMAN	7.40715e-07	3.09476e-06	0.850229	0.952145
PTPN13	sp|Q12923-4|PTN13-HUMAN	2.50279e-14	2.84916e-12	0.136631	0.421652
EPS8	sp|Q12929|EPS8-HUMAN	2.02544e-10	2.62311e-09	0.096646	0.354625
TRAP1	sp|Q12931|TRAP1-HUMAN	0.159869	0.208803	0.930289	0.979044
TRAF2	sp|Q12933-2|TRAF2-HUMAN	0.879133	0.901522	0.0768878	0.313017
SYNM	sp|O15061|SYNEM-HUMAN	1.59429e-09	1.46278e-08	0.136741	0.421842
FOXF1	sp|Q12946|FOXF1-HUMAN	0.138504	0.183683	0.448695	0.750619
FOXF2	sp|Q12947|FOXF2-HUMAN	0.00820586	0.0146526	0.820556	0.944216
FOXL1	sp|Q12952|FOXL1-HUMAN	0.026651	0.0421805	0.348696	0.670418
ANK3	sp|Q12955|ANK3-HUMAN	0.0181893	0.0299293	0.117356	0.389259
DLG1	sp|Q12959-2|DLG1-HUMAN	4.23753e-05	0.000121349	0.447502	0.750587
TAF10	sp|Q12962|TAF10-HUMAN	0.0150279	0.0253007	0.186675	0.498406
PPP1R8	sp|Q12972|PP1R8-HUMAN	0.000313236	0.000747115	0.323956	0.647139
NPRL3	sp|Q12980|NPRL3-HUMAN	0.224586	0.28151	0.11936	0.392938
BNIP1	sp|Q12981-1|SEC20-HUMAN	0.00193632	0.00393364	0.084991	0.330955
NFX1	sp|Q12986|NFX1-HUMAN	0.00289273	0.00565125	0.201358	0.520235
KIAA0355	sp|O15063|K0355-HUMAN	0.581775	0.637877	0.0398511	0.219979
CSTF3	sp|Q12996|CSTF3-HUMAN	8.39794e-06	2.77454e-05	0.704064	0.89564
TSPAN31	sp|Q12999|TSN31-HUMAN	0.0221655	0.035776	0.588652	0.839258
ECH1	sp|Q13011|ECH1-HUMAN	9.15604e-12	2.15928e-10	0.0781105	0.315906
MLLT11	sp|Q13015|AF1Q-HUMAN	0.906901	0.923722	0.0110551	0.105216
ARHGAP5	sp|Q13017|RHG05-HUMAN	1.7092e-06	6.58335e-06	0.411078	0.719847
STRN3	sp|Q13033|STRN3-HUMAN	2.32686e-09	2.01844e-08	0.0212443	0.154005
CDC16	sp|Q13042|CDC16-HUMAN	9.29505e-07	3.80256e-06	0.200339	0.518328
FLII	sp|Q13045-2|FLII-HUMAN	0.905774	0.923093	0.718712	0.902226
FLII	sp|Q13045|FLII-HUMAN	0.023016	0.037045	0.734349	0.909128
TRIM32	sp|Q13049|TRI32-HUMAN	0.577634	0.633714	0.0219943	0.156973
KIF3B	sp|O15066|KIF3B-HUMAN	7.6495e-08	4.12017e-07	0.021516	0.155241
COASY	sp|Q13057-2|COASY-HUMAN	0.575146	0.63136	0.849673	0.952145
TRAF1	sp|Q13077|TRAF1-HUMAN	0.203734	0.258195	0.51746	0.79682
MRPL28	sp|Q13084|RM28-HUMAN	8.82543e-05	0.000235404	0.193718	0.50833
ACACA	sp|Q13085-4|ACACA-HUMAN	0.79357	0.828108	0.0903841	0.342131
PLA2G7	sp|Q13093|PAFA-HUMAN	0.746029	0.786561	0.00594381	0.0721365
GPS1	sp|Q13098-7|CSN1-HUMAN	0.999174	0.999282	0.00616747	0.0743402
ZBTB17	sp|Q13105-2|ZBT17-HUMAN	0.000676208	0.00150575	0.888506	0.96635
USP4	sp|Q13107|UBP4-HUMAN	0.953979	0.962223	0.518586	0.797046
CHAF1B	sp|Q13112|CAF1B-HUMAN	6.64159e-07	2.80156e-06	0.984419	0.995211
REST	sp|Q13127|REST-HUMAN	0.00054683	0.00123647	0.86054	0.956161
PFAS	sp|O15067|PUR4-HUMAN	6.33927e-12	1.6328e-10	0.852661	0.953132
RLF	sp|Q13129|RLF-HUMAN	8.92979e-05	0.000237913	0.649664	0.870491
PRKAA1	sp|Q13131-2|AAPK1-HUMAN	2.06121e-06	7.81835e-06	0.870769	0.959722
PPFIA1	sp|Q13136|LIPA1-HUMAN	1.37482e-07	6.95785e-07	0.14132	0.429442
CALCOCO2	sp|Q13137-4|CACO2-HUMAN	5.66757e-07	2.43186e-06	0.860555	0.956161
EIF2B5	sp|Q13144|EI2BE-HUMAN	0.925223	0.938764	0.523475	0.800716
TARDBP	sp|Q13148|TADBP-HUMAN	2.05001e-05	6.2531e-05	0.545613	0.814621
HNRNPA0	sp|Q13151|ROA0-HUMAN	1.99692e-11	3.89293e-10	0.798269	0.935899
PAK1	sp|Q13153-2|PAK1-HUMAN	5.75353e-08	3.20564e-07	0.26284	0.58984
FADD	sp|Q13158|FADD-HUMAN	0.000257911	0.000626271	0.106319	0.371632
PRDX4	sp|Q13162|PRDX4-HUMAN	2.43527e-09	2.10248e-08	0.562346	0.825174
NACAD	sp|O15069|NACAD-HUMAN	0.0288757	0.0453908	0.00095026	0.022481
PAK2	sp|Q13177|PAK2-HUMAN	7.65922e-05	0.000207479	0.222673	0.543565
STK3	sp|Q13188-2|STK3-HUMAN	0.199613	0.25346	0.0605591	0.277267
STX5	sp|Q13190|STX5-HUMAN	0.0952603	0.131931	0.0199844	0.148742
CBLB	sp|Q13191|CBLB-HUMAN	0.161629	0.210684	0.262763	0.589809
DDX10	sp|Q13206|DDX10-HUMAN	1.00592e-11	2.3088e-10	0.901962	0.97026
SEMA3B	sp|Q13214|SEM3B-HUMAN	0.534328	0.593977	0.653276	0.871918
ERCC8	sp|Q13216|ERCC8-HUMAN	0.602426	0.656771	0.479755	0.77286
DNAJC3	sp|Q13217|DNJC3-HUMAN	0.0187445	0.030744	0.163429	0.46447
PAPPA	sp|Q13219|PAPP1-HUMAN	0.00138094	0.00289526	0.000155545	0.00643176
SELENBP1	sp|Q13228-4|SBP1-HUMAN	0.0951804	0.13184	4.50243e-05	0.00271563
DCLK1	sp|O15075|DCLK1-HUMAN	0.273898	0.335094	5.35801e-05	0.00303105
NME3	sp|Q13232|NDK3-HUMAN	4.73031e-13	2.37055e-11	0.68865	0.887254
PRKG2	sp|Q13237|KGP2-HUMAN	1.33137e-11	2.90914e-10	1.4376e-05	0.001287
MAD2L1	sp|Q13257|MD2L1-HUMAN	5.96931e-10	6.52941e-09	0.090003	0.341109
TRIM28	sp|Q13263|TIF1B-HUMAN	1.40733e-10	1.93398e-09	0.297611	0.621861
SEMA3F	sp|Q13275|SEM3F-HUMAN	5.17905e-06	1.78594e-05	0.975115	0.992771
NMI	sp|Q13287|NMI-HUMAN	0.903922	0.921714	0.0739916	0.307332
KCNAB2	sp|Q13303-3|KCAB2-HUMAN	0.247849	0.307262	0.192473	0.506649
PTK7	sp|Q13308-6|PTK7-HUMAN	0.000384715	0.000901285	0.000198156	0.0074885
GRB10	sp|Q13322|GRB10-HUMAN	2.71714e-08	1.65051e-07	0.971834	0.991456
IFIT5	sp|Q13325|IFIT5-HUMAN	0.472945	0.536082	0.255247	0.582006
KIAA0922	sp|A2VDJ0-5|T131L-HUMAN	0.0235807	0.0378482	0.187629	0.499893
SNPH	sp|O15079-2|SNPH-HUMAN	0.00230912	0.00460078	0.542312	0.813381
MTA1	sp|Q13330|MTA1-HUMAN	2.19351e-09	1.92999e-08	0.971449	0.991456
PTPRS	sp|Q13332-2|PTPRS-HUMAN	0.843954	0.870675	0.132698	0.415622
SLC14A1	sp|Q13336-2|UT1-HUMAN	4.19039e-08	2.42103e-07	1.19607e-06	0.000190154
PPP2R5C	sp|Q13362-4|2A5G-HUMAN	3.78784e-08	2.21061e-07	0.0557545	0.265792
CTBP1	sp|Q13363|CTBP1-HUMAN	0.000172858	0.000433132	0.0133209	0.117994
PDCL	sp|Q13371|PHLP-HUMAN	0.270258	0.331301	0.086037	0.333059
PLD1	sp|Q13393|PLD1-HUMAN	1.9879e-07	9.61217e-07	0.234906	0.558445
TARBP1	sp|Q13395|TARB1-HUMAN	7.86258e-10	8.11788e-09	0.724352	0.904429
DYNC1I2	sp|Q13409-2|DC1I2-HUMAN	0.129233	0.172704	0.698475	0.892673
DYNC1I2	sp|Q13409-5|DC1I2-HUMAN	6.03816e-10	6.5969e-09	0.817972	0.944216
ANKRD28	sp|O15084|ANR28-HUMAN	0.0288538	0.0453642	0.00122532	0.0266478
NNT	sp|Q13423|NNTM-HUMAN	1.88655e-06	7.20328e-06	0.970935	0.991456
SNTA1	sp|Q13424|SNTA1-HUMAN	0.044773	0.0669996	0.977738	0.99349
PPIG	sp|Q13427|PPIG-HUMAN	1.54938e-06	6.04861e-06	0.91624	0.974469
TCOF1	sp|Q13428-4|TCOF-HUMAN	0.000156678	0.000397667	0.19675	0.513657
UNC119	sp|Q13432|U119A-HUMAN	0.110894	0.150953	0.340492	0.661682
SLC39A6	sp|Q13433|S39A6-HUMAN	0.0143446	0.02427	0.472604	0.766942
SF3B2	sp|Q13435|SF3B2-HUMAN	1.74814e-10	2.31272e-09	0.74284	0.9137
OS9	sp|Q13438|OS9-HUMAN	0.00574222	0.0105581	0.00125529	0.0270445
GOLGA4	sp|Q13439-5|GOGA4-HUMAN	0.666717	0.71636	0.03288	0.19868
PDAP1	sp|Q13442|HAP28-HUMAN	0.230264	0.28794	0.589923	0.839522
ARHGEF11	sp|O15085-2|ARHGB-HUMAN	3.38438e-06	1.22397e-05	0.0127846	0.115576
ADAM9	sp|Q13443|ADAM9-HUMAN	0.871804	0.895002	0.729249	0.906376
ADAM15	sp|Q13444|ADA15-HUMAN	0.022001	0.0355291	0.237963	0.561334
TMED1	sp|Q13445|TMED1-HUMAN	0.0921647	0.128105	0.0558538	0.265981
TUSC3	sp|Q13454|TUSC3-HUMAN	0.899057	0.917836	4.11363e-05	0.00258701
ROCK1	sp|Q13464|ROCK1-HUMAN	0.952536	0.961167	0.246681	0.57267
TOP3A	sp|Q13472|TOP3A-HUMAN	5.17843e-07	2.2376e-06	0.0281323	0.182168
GAB1	sp|Q13480-2|GAB1-HUMAN	0.372602	0.438235	0.00293751	0.0477764
SMAD4	sp|Q13485|SMAD4-HUMAN	2.11259e-06	7.99679e-06	0.112536	0.380344
TCIRG1	sp|Q13488|VPP3-HUMAN	1.44929e-08	9.56094e-08	0.324232	0.647139
SQSTM1	sp|Q13501|SQSTM-HUMAN	2.42524e-08	1.49988e-07	0.457171	0.756292
KIAA0391	sp|O15091|MRRP3-HUMAN	9.25744e-06	3.02987e-05	0.767602	0.923432
ASAH1	sp|Q13510-2|ASAH1-HUMAN	2.35165e-06	8.82923e-06	0.638522	0.863695
PRPF4B	sp|Q13523|PRP4B-HUMAN	1.5345e-06	5.99562e-06	0.704716	0.89564
PIN1	sp|Q13526|PIN1-HUMAN	0.157794	0.206326	0.481536	0.773513
ATR	sp|Q13535|ATR-HUMAN	0.00731692	0.0131673	0.561261	0.824161
EIF4EBP1	sp|Q13541|4EBP1-HUMAN	0.391239	0.456949	0.0131391	0.117006
HDAC1	sp|Q13547|HDAC1-HUMAN	9.71213e-08	5.12331e-07	0.545243	0.814352
CAMK2B	sp|Q13554|KCC2B-HUMAN	2.98871e-09	2.49176e-08	0.908627	0.972091
CAMK2G	sp|Q13555-6|KCC2G-HUMAN	2.56385e-08	1.57399e-07	0.0331467	0.199248
PKD2	sp|Q13563|PKD2-HUMAN	0.365532	0.431405	0.810186	0.941846
NAE1	sp|Q13564|ULA1-HUMAN	0.000146022	0.00037257	0.0510988	0.252754
SMAD7	sp|O15105|SMAD7-HUMAN	0.141772	0.187558	0.772293	0.925883
SNW1	sp|Q13573|SNW1-HUMAN	3.90891e-09	3.118e-08	0.660991	0.87485
DGKZ	sp|Q13574|DGKZ-HUMAN	0.00152967	0.00318061	0.499427	0.784629
SEMA5A	sp|Q13591|SEM5A-HUMAN	0.0121472	0.0208645	0.052535	0.256989
TRA2A	sp|Q13595|TRA2A-HUMAN	7.33417e-07	3.06599e-06	0.107256	0.373419
SNX1	sp|Q13596|SNX1-HUMAN	4.19418e-09	3.30834e-08	0.397133	0.70749
KRR1	sp|Q13601|KRR1-HUMAN	5.82344e-09	4.38351e-08	0.0773227	0.313955
PWP1	sp|Q13610|PWP1-HUMAN	0.00142284	0.00297573	0.437288	0.742722
MTMR2	sp|Q13614|MTMR2-HUMAN	0.400123	0.465556	0.944192	0.983854
CUL2	sp|Q13617-2|CUL2-HUMAN	0.30304	0.366182	0.558675	0.822817
CUL4A	sp|Q13619|CUL4A-HUMAN	0.0391171	0.0594036	0.93537	0.981011
LSM1	sp|O15116|LSM1-HUMAN	4.11218e-05	0.000118163	0.0258252	0.173564
CUL4B	sp|Q13620|CUL4B-HUMAN	0.0233523	0.0375273	0.278699	0.605732
TP53BP2	sp|Q13625-3|ASPP2-HUMAN	0.00216999	0.00435368	0.00117183	0.0259579
DYRK1A	sp|Q13627|DYR1A-HUMAN	5.54085e-06	1.89934e-05	0.696379	0.89123
RAB32	sp|Q13637|RAB32-HUMAN	0.00270044	0.00530481	0.0258624	0.173564
TPBG	sp|Q13641|TPBG-HUMAN	0.000201117	0.000498119	0.00373444	0.0550388
FHL1	sp|Q13642-4|FHL1-HUMAN	4.99989e-07	2.1696e-06	0.0396157	0.219178
FHL1	sp|Q13642|FHL1-HUMAN	7.65423e-07	3.18256e-06	0.0165958	0.133667
FHL3	sp|Q13643|FHL3-HUMAN	3.63851e-07	1.63343e-06	0.116542	0.387816
RIN1	sp|Q13671|RIN1-HUMAN	2.62736e-05	7.8455e-05	0.200933	0.519574
ITGA7	sp|Q13683-3|ITA7-HUMAN	0.141243	0.186965	0.0959106	0.353474
TBX3	sp|O15119|TBX3-HUMAN	2.2556e-10	2.87983e-09	0.141094	0.428957
ALKBH1	sp|Q13686|ALKB1-HUMAN	0.025637	0.0408076	0.817668	0.944216
MOGS	sp|Q13724|MOGS-HUMAN	2.61144e-13	1.56592e-11	0.369428	0.687053
ALCAM	sp|Q13740-2|CD166-HUMAN	0.292972	0.355366	0.190089	0.503247
LAMB3	sp|Q13751|LAMB3-HUMAN	0.00102737	0.00220927	0.00932818	0.0949395
THOC5	sp|Q13769|THOC5-HUMAN	1.24902e-08	8.43136e-08	0.97182	0.991456
NCOA4	sp|Q13772-4|NCOA4-HUMAN	4.94456e-10	5.58747e-09	0.122011	0.397549
PMAIP1	sp|Q13794|APR-HUMAN	0.161448	0.210508	0.328838	0.651809
SHROOM2	sp|Q13796|SHRM2-HUMAN	0.466943	0.52993	0.41178	0.719951
SPTAN1	sp|Q13813|SPTN1-HUMAN	0.567844	0.624588	0.106201	0.371466
ENPP2	sp|Q13822-2|ENPP2-HUMAN	0.0162684	0.0270827	0.461758	0.75888
DEGS1	sp|O15121|DEGS1-HUMAN	0.101868	0.139989	0.228859	0.550657
GNL2	sp|Q13823|NOG2-HUMAN	1.84256e-06	7.04696e-06	0.0925749	0.347288
AUH	sp|Q13825|AUHM-HUMAN	8.10587e-07	3.36231e-06	0.218341	0.539475
TNFAIP1	sp|Q13829|BACD2-HUMAN	0.0767004	0.108799	0.0449084	0.23497
DDX39B	sp|Q13838-2|DX39B-HUMAN	1.4742e-09	1.37032e-08	0.551986	0.818174
BLMH	sp|Q13867|BLMH-HUMAN	0.787145	0.822652	0.844722	0.950712
EXOSC2	sp|Q13868|EXOS2-HUMAN	9.63863e-08	5.09016e-07	0.0831916	0.326073
SNTB1	sp|Q13884|SNTB1-HUMAN	0.713938	0.759047	0.0101836	0.100565
TUBB2A	sp|Q13885|TBB2A-HUMAN	1.09754e-12	4.23448e-11	0.325293	0.648432
GTF2H2	sp|Q13888|TF2H2-HUMAN	2.83999e-08	1.71496e-07	0.0243744	0.166609
GTF2H3	sp|Q13889|TF2H3-HUMAN	0.000427364	0.00098889	0.83982	0.950051
ARPC1B	sp|O15143|ARC1B-HUMAN	3.93229e-09	3.13123e-08	0.136373	0.421131
BYSL	sp|Q13895|BYST-HUMAN	1.1949e-08	8.12551e-08	0.70644	0.896516
RAPGEF1	sp|Q13905-3|RPGF1-HUMAN	3.24189e-07	1.47113e-06	0.0806324	0.320726
IDI1	sp|Q13907-2|IDI1-HUMAN	0.051131	0.0755697	0.308101	0.632224
CUX1	sp|Q13948-2|CASP-HUMAN	0.990554	0.992243	0.00117105	0.0259579
CBFB	sp|Q13951-2|PEBB-HUMAN	0.0414579	0.0626488	0.390116	0.703826
NFYC	sp|Q13952|NFYC-HUMAN	4.18003e-08	2.41656e-07	0.255041	0.581851
PRKG1	sp|Q13976-2|KGP1-HUMAN	6.92451e-07	2.90906e-06	0.168931	0.472617
PRKG1	sp|Q13976|KGP1-HUMAN	0.000945365	0.00204437	0.302411	0.62677
CDK13	sp|Q14004|CDK13-HUMAN	2.48116e-06	9.23648e-06	0.539605	0.811829
CKAP5	sp|Q14008|CKAP5-HUMAN	0.0179451	0.0295538	0.619873	0.854459
ARPC3	sp|O15145|ARPC3-HUMAN	0.00997895	0.0174636	0.103583	0.366338
COTL1	sp|Q14019|COTL1-HUMAN	1.80555e-05	5.57941e-05	0.336817	0.659044
COX17	sp|Q14061|COX17-HUMAN	0.31616	0.379869	0.567792	0.827372
RAB33A	sp|Q14088|RB33A-HUMAN	0.459848	0.523295	0.17265	0.477507
HNRNPD	sp|Q14103-2|HNRPD-HUMAN	6.06497e-06	2.06518e-05	0.757143	0.919975
TOB2	sp|Q14106|TOB2-HUMAN	0.0260778	0.0414206	0.442603	0.747012
NID2	sp|Q14112|NID2-HUMAN	5.48559e-07	2.36037e-06	0.00341546	0.0523156
LRP8	sp|Q14114|LRP8-HUMAN	0.113164	0.153612	0.149266	0.442852
IL18	sp|Q14116|IL18-HUMAN	0.783581	0.819678	0.100815	0.361509
VEZF1	sp|Q14119|VEZF1-HUMAN	8.82513e-13	3.69893e-11	0.724565	0.904429
PDE1C	sp|Q14123-3|PDE1C-HUMAN	0.0193945	0.0316974	0.286998	0.613731
VWA8	sp|A3KMH1|VWA8-HUMAN	0.152023	0.199602	0.688319	0.887195
POLR1C	sp|O15160|RPAC1-HUMAN	2.60975e-11	4.79373e-10	0.00159812	0.0323164
DSG2	sp|Q14126|DSG2-HUMAN	0.0137556	0.0233376	8.25532e-08	2.71865e-05
BOP1	sp|Q14137|BOP1-HUMAN	8.66979e-16	2.42255e-13	0.106983	0.372682
UBE4A	sp|Q14139-2|UBE4A-HUMAN	0.0553308	0.0811783	0.0732632	0.306099
TRIM14	sp|Q14142|TRI14-HUMAN	0.135755	0.180504	0.112758	0.380344
KEAP1	sp|Q14145|KEAP1-HUMAN	1.59914e-10	2.14951e-09	0.0789174	0.316803
DHX34	sp|Q14147|DHX34-HUMAN	1.1327e-15	2.67812e-13	0.0771153	0.313527
MORC3	sp|Q14149|MORC3-HUMAN	1.82402e-09	1.64895e-08	0.893753	0.96701
SAFB2	sp|Q14151|SAFB2-HUMAN	6.59918e-09	4.87979e-08	0.872472	0.960146
EIF3A	sp|Q14152|EIF3A-HUMAN	0.00846992	0.0150716	0.238153	0.561529
ARHGEF7	sp|Q14155-5|ARHG7-HUMAN	0.017319	0.0286506	0.548369	0.816499
PLSCR1	sp|O15162|PLS1-HUMAN	2.8066e-05	8.3241e-05	0.565166	0.826689
UBAP2L	sp|Q14157-1|UBP2L-HUMAN	0.368446	0.434344	0.178869	0.488154
UBAP2L	sp|Q14157-5|UBP2L-HUMAN	0.106661	0.145793	0.00284184	0.047046
SCRIB	sp|Q14160|SCRIB-HUMAN	3.24844e-06	1.17836e-05	0.207483	0.52805
GIT2	sp|Q14161|GIT2-HUMAN	0.255343	0.315238	0.424351	0.730299
IKBKE	sp|Q14164|IKKE-HUMAN	0.235032	0.293543	0.032763	0.198477
MLEC	sp|Q14165|MLEC-HUMAN	3.15275e-06	1.14635e-05	0.885922	0.965841
MPP2	sp|Q14168-4|MPP2-HUMAN	0.123456	0.165825	0.118014	0.390423
POLA2	sp|Q14181|DPOA2-HUMAN	5.6027e-14	5.55511e-12	0.0103924	0.101513
DOCK1	sp|Q14185|DOCK1-HUMAN	0.929957	0.942426	0.124455	0.402167
TFDP1	sp|Q14186|TFDP1-HUMAN	0.122456	0.164698	0.202351	0.52156
TRIM24	sp|O15164|TIF1A-HUMAN	5.06655e-06	1.75305e-05	0.292605	0.618833
WRN	sp|Q14191|WRN-HUMAN	5.92591e-07	2.52625e-06	0.555423	0.820894
CRMP1	sp|Q14194-2|DPYL1-HUMAN	7.92154e-06	2.62373e-05	0.651449	0.871198
MRPL58	sp|Q14197|ICT1-HUMAN	0.0231027	0.037178	0.0897142	0.340554
DYNC1H1	sp|Q14204|DYHC1-HUMAN	1.60759e-09	1.47352e-08	0.600285	0.843143
EIF2B1	sp|Q14232|EI2BA-HUMAN	0.256472	0.316167	0.496376	0.78388
EIF4A2	sp|Q14240-2|IF4A2-HUMAN	0.000408196	0.000950051	0.125199	0.403516
ELOA	sp|Q14241|ELOA1-HUMAN	0.000345601	0.000816914	0.358944	0.679876
ENDOG	sp|Q14249|NUCG-HUMAN	0.0630773	0.0913086	0.369702	0.687053
FLOT2	sp|Q14254|FLOT2-HUMAN	2.25903e-11	4.27731e-10	0.963029	0.989645
RCN2	sp|Q14257-2|RCN2-HUMAN	0.00199295	0.00403713	0.81179	0.942537
PGRMC2	sp|O15173-2|PGRC2-HUMAN	2.38439e-05	7.18277e-05	0.0464633	0.238618
TRIM25	sp|Q14258|TRI25-HUMAN	0.0779826	0.110343	0.693274	0.889602
FLNC	sp|Q14315|FLNC-HUMAN	0.00104412	0.00224267	0.605223	0.846025
FKBP8	sp|Q14318-2|FKBP8-HUMAN	0.593574	0.649347	0.821746	0.94447
FAM50A	sp|Q14320|FA50A-HUMAN	1.17973e-08	8.04014e-08	0.740981	0.913204
FRG1	sp|Q14331|FRG1-HUMAN	2.93236e-11	5.29145e-10	0.00716318	0.0816027
GALE	sp|Q14376|GALE-HUMAN	0.00403772	0.00766969	0.215743	0.537073
GAS6	sp|Q14393-2|GAS6-HUMAN	0.158213	0.206817	0.85916	0.955698
GPR176	sp|Q14439|GP176-HUMAN	0.00595274	0.0108888	0.0398518	0.219979
PIGH	sp|Q14442|PIGH-HUMAN	0.185934	0.238488	0.323325	0.646519
CAPRIN1	sp|Q14444|CAPR1-HUMAN	1.78743e-06	6.85317e-06	0.0788495	0.316803
CTDSPL	sp|O15194|CTDSL-HUMAN	0.446856	0.510653	0.518631	0.797046
RBM39	sp|Q14498|RBM39-HUMAN	4.31557e-09	3.38441e-08	0.689243	0.887765
NEDD9	sp|Q14511-3|CASL-HUMAN	0.919371	0.934162	0.0174874	0.13791
FAT1	sp|Q14517|FAT1-HUMAN	0.00216973	0.00435368	0.844183	0.950454
HABP2	sp|Q14520|HABP2-HUMAN	0.138648	0.183847	0.777016	0.927379
HIC1	sp|Q14526|HIC1-HUMAN	1.22183e-07	6.28011e-07	0.228623	0.550657
HLTF	sp|Q14527|HLTF-HUMAN	4.16343e-06	1.4716e-05	0.337731	0.659512
SQLE	sp|Q14534|ERG1-HUMAN	0.481898	0.545359	0.137692	0.422659
PDIA5	sp|Q14554|PDIA5-HUMAN	1.64987e-07	8.13551e-07	0.965493	0.990301
PRPSAP1	sp|Q14558-2|KPRA-HUMAN	0.000160448	0.000405897	0.01873	0.143054
SEMA3A	sp|Q14563|SEM3A-HUMAN	4.90349e-09	3.79321e-08	0.0239215	0.164367
SMAD9	sp|O15198|SMAD9-HUMAN	0.00216784	0.00435125	0.435244	0.740556
MCM6	sp|Q14566|MCM6-HUMAN	1.71868e-12	5.93557e-11	0.484196	0.775529
ITPR2	sp|Q14571|ITPR2-HUMAN	0.388695	0.454669	0.672058	0.879548
ITPR3	sp|Q14573|ITPR3-HUMAN	0.736148	0.777876	0.246517	0.572613
INPP5A	sp|Q14642|I5P1-HUMAN	4.96815e-08	2.81223e-07	0.1261	0.404722
ITPR1	sp|Q14643|ITPR1-HUMAN	6.4664e-06	2.18253e-05	0.701932	0.894722
RASA3	sp|Q14644|RASA3-HUMAN	3.08537e-13	1.73477e-11	0.0003615	0.0113768
PLS1	sp|Q14651|PLSI-HUMAN	0.00258838	0.00510425	0.0514847	0.253601
IRF3	sp|Q14653|IRF3-HUMAN	0.197205	0.250852	0.0284172	0.183064
LAGE3	sp|Q14657|LAGE3-HUMAN	0.681011	0.728746	0.074823	0.308765
KIAA0100	sp|Q14667|K0100-HUMAN	0.000918605	0.00199258	0.0401537	0.220972
NKRF	sp|O15226-2|NKRF-HUMAN	1.44554e-12	5.14644e-11	0.0374251	0.212498
TRIP12	sp|Q14669-2|TRIPC-HUMAN	2.99522e-06	1.09425e-05	0.411703	0.719951
TRIP12	sp|Q14669-3|TRIPC-HUMAN	0.000289887	0.000697378	0.736986	0.910726
PUM1	sp|Q14671|PUM1-HUMAN	0.144091	0.190298	0.727098	0.90502
MDC1	sp|Q14676|MDC1-HUMAN	1.30263e-10	1.82269e-09	0.831031	0.947445
CLINT1	sp|Q14677|EPN4-HUMAN	6.82474e-07	2.87094e-06	0.787364	0.931862
KANK1	sp|Q14678|KANK1-HUMAN	0.470684	0.533847	3.95917e-07	8.11278e-05
KCTD2	sp|Q14681|KCTD2-HUMAN	0.0109542	0.0190152	0.550846	0.818174
SMC1A	sp|Q14683|SMC1A-HUMAN	2.27004e-12	7.47574e-11	0.7795	0.928468
RRP1B	sp|Q14684|RRP1B-HUMAN	3.85829e-09	3.08983e-08	0.40443	0.714279
NCOA6	sp|Q14686|NCOA6-HUMAN	0.74599	0.786561	0.0437226	0.231971
LAMA5	sp|O15230|LAMA5-HUMAN	0.0342915	0.0528236	0.24981	0.576739
DIP2A	sp|Q14689|DIP2A-HUMAN	0.567552	0.624435	0.164589	0.465544
PDCD11	sp|Q14690|RRP5-HUMAN	8.5661e-14	7.59101e-12	0.338808	0.660218
GINS1	sp|Q14691|PSF1-HUMAN	2.21149e-07	1.05823e-06	0.00271848	0.0461411
BMS1	sp|Q14692|BMS1-HUMAN	5.36124e-12	1.42057e-10	0.224964	0.546036
LPIN1	sp|Q14693-7|LPIN1-HUMAN	1.11489e-07	5.78523e-07	0.0511462	0.252754
USP10	sp|Q14694-2|UBP10-HUMAN	1.53361e-10	2.07657e-09	0.0227496	0.160133
MESDC2	sp|Q14696|MESD-HUMAN	0.91541	0.931163	0.060118	0.276449
GANAB	sp|Q14697-2|GANAB-HUMAN	0.0602425	0.0875625	0.920681	0.976041
RFTN1	sp|Q14699|RFTN1-HUMAN	0.0446313	0.0668418	0.594758	0.840825
MBTPS1	sp|Q14703|MBTP1-HUMAN	0.0127484	0.0217851	0.845694	0.951327
ZNF185	sp|O15231-3|ZN185-HUMAN	0.330259	0.394573	6.2212e-10	4.5119e-07
MFSD10	sp|Q14728|MFS10-HUMAN	6.23359e-07	2.65006e-06	0.538013	0.811165
PPP2R5D	sp|Q14738|2A5D-HUMAN	0.000174484	0.000436968	0.993943	0.997948
COG2	sp|Q14746|COG2-HUMAN	0.80801	0.840079	0.597488	0.842293
MVP	sp|Q14764|MVP-HUMAN	2.70954e-11	4.95728e-10	0.711238	0.899154
LTBP1	sp|Q14766-3|LTBP1-HUMAN	0.0767058	0.108799	0.570012	0.828773
LTBP1	sp|Q14766-4|LTBP1-HUMAN	0.117259	0.158634	0.749214	0.915806
LTBP2	sp|Q14767|LTBP2-HUMAN	4.67496e-08	2.66097e-07	0.000665814	0.01735
GOLGB1	sp|Q14789|GOGB1-HUMAN	0.151876	0.199466	0.0824188	0.324779
CASP8	sp|Q14790-9|CASP8-HUMAN	0.83622	0.864437	0.294222	0.619264
NAA30	sp|Q147X3|NAA30-HUMAN	0.677086	0.725125	0.840579	0.950051
CLIC2	sp|O15247|CLIC2-HUMAN	1.06822e-10	1.55364e-09	0.542886	0.813531
KIF22	sp|Q14807|KIF22-HUMAN	8.6253e-10	8.72107e-09	0.912757	0.973708
ARID5B	sp|Q14865|ARI5B-HUMAN	5.16519e-05	0.000145238	0.00586292	0.0714161
MTF1	sp|Q14872|MTF1-HUMAN	0.0647983	0.0935502	0.240412	0.56423
PTGR1	sp|Q14914|PTGR1-HUMAN	1.59009e-09	1.46038e-08	0.00414785	0.0578044
NFATC4	sp|Q14934-2|NFAC4-HUMAN	0.677714	0.725555	2.38094e-05	0.00178033
NFIX	sp|Q14938-3|NFIX-HUMAN	2.54528e-08	1.56467e-07	0.139444	0.426048
GPNMB	sp|Q14956|GPNMB-HUMAN	0.0914402	0.127137	0.862503	0.956835
ZNF638	sp|Q14966|ZN638-HUMAN	1.48317e-07	7.43681e-07	0.0359677	0.207936
KPNB1	sp|Q14974|IMB1-HUMAN	2.90046e-07	1.33659e-06	0.00940885	0.0955496
NOLC1	sp|Q14978-2|NOLC1-HUMAN	5.45162e-13	2.60231e-11	0.165246	0.466152
SBNO1	sp|A3KN83|SBNO1-HUMAN	3.08715e-10	3.75415e-09	0.811491	0.942537
SURF4	sp|O15260|SURF4-HUMAN	1.89623e-07	9.21845e-07	0.000288266	0.00980851
NOLC1	sp|Q14978-3|NOLC1-HUMAN	0.268946	0.330005	0.712777	0.899902
PSME4	sp|Q14997|PSME4-HUMAN	3.55641e-06	1.27651e-05	0.0028941	0.0475717
CUL7	sp|Q14999-2|CUL7-HUMAN	0.898322	0.917424	0.00548784	0.0684979
SLMAP	sp|Q14BN4|SLMAP-HUMAN	7.28053e-09	5.32807e-08	0.888707	0.96635
GAPVD1	sp|Q14C86-6|GAPD1-HUMAN	0.895869	0.91563	0.934844	0.981011
ARHGAP19	sp|Q14CB8-2|RHG19-HUMAN	0.000452573	0.00104251	0.916134	0.974469
UBXN2B	sp|Q14CS0|UBX2B-HUMAN	0.043222	0.0649952	0.258964	0.585416
NAA25	sp|Q14CX7|NAA25-HUMAN	0.000531389	0.00120433	0.189767	0.502684
FASTKD3	sp|Q14CZ7|FAKD3-HUMAN	0.246874	0.306382	0.382008	0.696998
VEPH1	sp|Q14D04|MELT-HUMAN	0.00431737	0.00813953	0.932832	0.979592
ATXN7	sp|O15265-2|ATX7-HUMAN	0.00667163	0.0120863	0.162738	0.463185
EMC2	sp|Q15006|EMC2-HUMAN	0.000844595	0.00184725	0.306065	0.630524
WTAP	sp|Q15007|FL2D-HUMAN	3.60471e-10	4.24508e-09	0.700101	0.894008
PSMD6	sp|Q15008-4|PSMD6-HUMAN	0.504017	0.566566	0.274098	0.601821
PSMD6	sp|Q15008|PSMD6-HUMAN	0.0597022	0.0868866	0.00975537	0.0978974
MAD2L1BP	sp|Q15013-3|MD2BP-HUMAN	0.309803	0.373277	0.861201	0.956353
FAM175B	sp|Q15018|F175B-HUMAN	4.27497e-08	2.46064e-07	0.0873365	0.3355
2021-09-02	sp|Q15019-2|SEPT2-HUMAN	1.62365e-08	1.05882e-07	0.0120283	0.111695
SART3	sp|Q15020|SART3-HUMAN	5.44402e-05	0.000152165	0.599536	0.843122
SUZ12	sp|Q15022|SUZ12-HUMAN	3.49936e-09	2.84798e-08	0.539066	0.811829
TNIP1	sp|Q15025|TNIP1-HUMAN	8.08356e-05	0.000217504	0.00246681	0.0432005
OGT	sp|O15294|OGT1-HUMAN	0.000100278	0.000264265	0.109338	0.376057
EFTUD2	sp|Q15029|U5S1-HUMAN	1.14868e-13	8.97629e-12	0.144258	0.433651
LARS2	sp|Q15031|SYLM-HUMAN	0.417534	0.48289	0.762735	0.921223
R3HDM1	sp|Q15032-2|R3HD1-HUMAN	0.0627705	0.0909072	0.0108926	0.104192
HERC3	sp|Q15034|HERC3-HUMAN	0.805801	0.838728	0.691772	0.888169
TRAM2	sp|Q15035|TRAM2-HUMAN	0.0406779	0.0615609	0.222363	0.543487
SNX17	sp|Q15036|SNX17-HUMAN	0.152637	0.200294	0.207735	0.52805
JOSD1	sp|Q15040|JOS1-HUMAN	0.0127294	0.0217568	0.0363334	0.208573
SLC39A14	sp|Q15043|S39AE-HUMAN	1.11742e-13	8.80658e-12	0.308683	0.632807
KARS	sp|Q15046-2|SYK-HUMAN	7.89356e-05	0.000213013	5.50183e-05	0.00305617
SETDB1	sp|Q15047|SETB1-HUMAN	0.00801609	0.0143443	0.275711	0.603448
HMGB3	sp|O15347|HMGB3-HUMAN	2.25097e-11	4.27731e-10	0.140443	0.427575
LRRC14	sp|Q15048|LRC14-HUMAN	0.00257652	0.00508303	0.496707	0.784001
RRS1	sp|Q15050|RRS1-HUMAN	4.07061e-08	2.36219e-07	0.433272	0.738349
ARHGEF6	sp|Q15052|ARHG6-HUMAN	0.0153639	0.0257771	0.948874	0.985838
EIF4H	sp|Q15056|IF4H-HUMAN	0.810065	0.841646	0.245222	0.570575
ACAP2	sp|Q15057|ACAP2-HUMAN	2.05004e-07	9.89188e-07	0.0158874	0.130685
KIF14	sp|Q15058|KIF14-HUMAN	1.05171e-08	7.25344e-08	0.201844	0.520761
BRD3	sp|Q15059|BRD3-HUMAN	0.0148506	0.0250343	0.345221	0.666751
WDR43	sp|Q15061|WDR43-HUMAN	1.63308e-12	5.74759e-11	0.19705	0.513995
ZNF146	sp|Q15072|OZF-HUMAN	0.000155234	0.000394438	0.675399	0.881633
EEA1	sp|Q15075|EEA1-HUMAN	9.23188e-09	6.48341e-08	0.00336671	0.0520877
GPR37	sp|O15354|GPR37-HUMAN	0.506058	0.568516	0.729851	0.906531
PDIA6	sp|Q15084-2|PDIA6-HUMAN	2.06818e-09	1.8302e-08	0.803819	0.938942
PCOLCE	sp|Q15113|PCOC1-HUMAN	2.01114e-06	7.64099e-06	0.162513	0.463185
PDK1	sp|Q15118|PDK1-HUMAN	0.229631	0.287304	0.286788	0.613424
PDK2	sp|Q15119|PDK2-HUMAN	3.24546e-08	1.92949e-07	0.608736	0.848165
PEA15	sp|Q15121-2|PEA15-HUMAN	3.56282e-05	0.000103636	0.429114	0.734111
PGM5	sp|Q15124|PGM5-HUMAN	1.81244e-10	2.37731e-09	0.578149	0.832726
EBP	sp|Q15125|EBP-HUMAN	0.187314	0.240023	0.726873	0.905008
PMVK	sp|Q15126|PMVK-HUMAN	0.213067	0.268474	0.801296	0.937896
PLCB4	sp|Q15147-4|PLCB4-HUMAN	2.90135e-09	2.43059e-08	0.0551666	0.26453
PLEC	sp|Q15149-3|PLEC-HUMAN	3.64434e-11	6.34046e-10	0.000139224	0.00604986
INPPL1	sp|O15357|SHIP2-HUMAN	3.86165e-14	3.96395e-12	0.000573849	0.0157484
PLEC	sp|Q15149-4|PLEC-HUMAN	0.00123787	0.0026228	0.00915854	0.0942532
PLEC	sp|Q15149-5|PLEC-HUMAN	0.00567115	0.0104399	0.89141	0.966737
PLEC	sp|Q15149-8|PLEC-HUMAN	0.246951	0.306438	0.054245	0.261831
PLEC	sp|Q15149|PLEC-HUMAN	6.44572e-10	6.93536e-09	4.78794e-05	0.0028301
TCEAL1	sp|Q15170-2|TCAL1-HUMAN	0.394278	0.459858	0.232561	0.555412
PPP2R5A	sp|Q15172|2A5A-HUMAN	0.00333286	0.00643609	4.10792e-05	0.00258701
PPP2R5B	sp|Q15173|2A5B-HUMAN	1.1716e-05	3.74596e-05	0.0608607	0.277837
PPA1	sp|Q15181|IPYR-HUMAN	0.000147459	0.000375921	0.860953	0.956353
NECTIN1	sp|Q15223|NECT1-HUMAN	0.537772	0.59723	0.0370259	0.211272
PTPRK	sp|Q15262-3|PTPRK-HUMAN	0.00193078	0.00392413	0.77566	0.927204
FANCA	sp|O15360|FANCA-HUMAN	0.00254972	0.00503663	0.0276783	0.180752
PWP2	sp|Q15269|PWP2-HUMAN	3.0698e-13	1.73477e-11	0.064073	0.285808
RABEP1	sp|Q15276|RABE1-HUMAN	0.0573063	0.0837037	0.488947	0.778384
RAB35	sp|Q15286|RAB35-HUMAN	0.0933177	0.129493	0.581821	0.835016
RNPS1	sp|Q15287|RNPS1-HUMAN	1.20626e-07	6.21045e-07	0.402761	0.713243
ERBB4	sp|Q15303|ERBB4-HUMAN	0.489941	0.5529	0.889504	0.966509
RALBP1	sp|Q15311|RBP1-HUMAN	0.607872	0.661379	0.0108811	0.104192
ZMYND11	sp|Q15326|ZMY11-HUMAN	3.8823e-06	1.38354e-05	0.00565277	0.069499
E2F5	sp|Q15329|E2F5-HUMAN	0.294799	0.3573	0.25756	0.584105
LLGL1	sp|Q15334|L2GL1-HUMAN	7.83458e-08	4.20994e-07	0.000382326	0.0117907
LRRC41	sp|Q15345|LRC41-HUMAN	0.115688	0.156738	0.224577	0.545875
EIF3D	sp|O15371|EIF3D-HUMAN	8.06419e-05	0.000217109	0.862948	0.957161
RPS6KA2	sp|Q15349-2|KS6A2-HUMAN	1.1406e-05	3.65315e-05	0.472759	0.766942
TMED2	sp|Q15363|TMED2-HUMAN	9.1541e-05	0.000243256	0.27837	0.605532
PCBP2	sp|Q15366-2|PCBP2-HUMAN	4.09256e-07	1.8143e-06	0.0166123	0.133667
ELOB	sp|Q15370|ELOB-HUMAN	2.13923e-06	8.09431e-06	0.153933	0.449467
RHEB	sp|Q15382|RHEB-HUMAN	0.00470636	0.00879556	0.0367676	0.210059
UBE3C	sp|Q15386|UBE3C-HUMAN	2.82978e-05	8.38745e-05	0.125117	0.403516
TOMM20	sp|Q15388|TOM20-HUMAN	0.0001886	0.000469261	0.965238	0.990192
ANGPT1	sp|Q15389|ANGP1-HUMAN	0.538893	0.59833	0.0587775	0.272767
DHCR24	sp|Q15392|DHC24-HUMAN	0.433129	0.497787	0.309181	0.633353
SF3B3	sp|Q15393|SF3B3-HUMAN	1.26039e-10	1.77827e-09	0.24935	0.576544
HDAC3	sp|O15379-2|HDAC3-HUMAN	5.97038e-06	2.03598e-05	0.586709	0.838896
PUM3	sp|Q15397|PUM3-HUMAN	4.42323e-13	2.2534e-11	0.19175	0.505323
DLGAP5	sp|Q15398|DLGP5-HUMAN	8.7464e-11	1.31782e-09	0.444297	0.748285
RSU1	sp|Q15404|RSU1-HUMAN	1.46882e-06	5.76093e-06	0.315713	0.640949
CNN3	sp|Q15417|CNN3-HUMAN	1.33829e-15	3.0851e-13	2.20618e-08	8.84485e-06
RPS6KA1	sp|Q15418-2|KS6A1-HUMAN	8.15161e-07	3.37825e-06	0.0149088	0.125742
SAFB	sp|Q15424-3|SAFB1-HUMAN	3.10845e-07	1.41616e-06	0.568273	0.82767
SF3B4	sp|Q15427|SF3B4-HUMAN	1.04406e-06	4.2299e-06	0.777708	0.927813
RBMS2	sp|Q15434|RBMS2-HUMAN	0.359208	0.424975	0.639079	0.863942
PPP1R7	sp|Q15435|PP1R7-HUMAN	0.000414401	0.00096276	0.0891459	0.339395
SEC23A	sp|Q15436|SC23A-HUMAN	9.54555e-06	3.11574e-05	0.778216	0.927961
NVL	sp|O15381|NVL-HUMAN	9.15543e-10	9.12473e-09	0.910502	0.973225
SEC23B	sp|Q15437|SC23B-HUMAN	6.36043e-11	1.01703e-09	0.234015	0.557297
CYTH1	sp|Q15438|CYH1-HUMAN	2.14954e-05	6.5351e-05	0.0238407	0.163933
SF3A1	sp|Q15459|SF3A1-HUMAN	1.16724e-08	7.96676e-08	0.626077	0.857243
SHB	sp|Q15464|SHB-HUMAN	0.0386846	0.0588923	0.0327139	0.198457
SKIV2L	sp|Q15477|SKIV2-HUMAN	4.51222e-09	3.51116e-08	0.392787	0.705988
RGN	sp|Q15493|RGN-HUMAN	0.00251764	0.00498048	0.132142	0.414672
SURF1	sp|Q15526|SURF1-HUMAN	0.000124281	0.000320918	0.171517	0.475656
SURF2	sp|Q15527|SURF2-HUMAN	1.35788e-12	4.94903e-11	0.216292	0.537073
TAF5	sp|Q15542|TAF5-HUMAN	0.926681	0.939519	0.61974	0.854459
TAF13	sp|Q15543|TAF13-HUMAN	0.00012915	0.000332558	0.58877	0.839258
CPED1	sp|A4D0V7|CPED1-HUMAN	0.68113	0.728788	0.705909	0.896088
BIRC5	sp|O15392-2|BIRC5-HUMAN	5.71905e-10	6.29301e-09	0.540711	0.812583
TAF7	sp|Q15545|TAF7-HUMAN	0.00113167	0.00241275	0.268941	0.595701
TERF2	sp|Q15554|TERF2-HUMAN	5.33069e-08	2.99904e-07	0.26332	0.590385
TESK1	sp|Q15569|TESK1-HUMAN	0.00169387	0.00349031	0.0757718	0.310668
NCOA2	sp|Q15596|NCOA2-HUMAN	0.00686912	0.0124269	0.0034283	0.0523553
TRADD	sp|Q15628|TRADD-HUMAN	3.5492e-10	4.19042e-09	0.0264547	0.176019
TSN	sp|Q15631|TSN-HUMAN	0.550103	0.608871	0.0986452	0.357691
TARBP2	sp|Q15633|TRBP2-HUMAN	0.541878	0.601344	0.997906	0.999423
TRIP10	sp|Q15642|CIP4-HUMAN	3.1551e-10	3.813e-09	1.151e-06	0.000189524
TRIP11	sp|Q15643|TRIPB-HUMAN	0.041686	0.062942	0.00534775	0.0674419
TRIP13	sp|Q15645|PCH2-HUMAN	5.3276e-10	5.94743e-09	0.645208	0.867248
NCAM2	sp|O15394|NCAM2-HUMAN	1.22186e-05	3.89853e-05	0.015811	0.130238
MED1	sp|Q15648|MED1-HUMAN	4.17351e-11	7.1174e-10	0.850004	0.952145
TRIP4	sp|Q15650|TRIP4-HUMAN	0.00187578	0.00382497	0.372846	0.689861
HMGN3	sp|Q15651|HMGN3-HUMAN	6.13626e-09	4.58529e-08	0.100965	0.361551
JMJD1C	sp|Q15652|JHD2C-HUMAN	0.273933	0.335094	0.997021	0.999142
TRIP6	sp|Q15654|TRIP6-HUMAN	0.250704	0.310301	0.185391	0.49652
TWIST1	sp|Q15672|TWST1-HUMAN	0.0019902	0.00403269	0.250066	0.577064
PTPN14	sp|Q15678|PTN14-HUMAN	7.43246e-06	2.47596e-05	0.811803	0.942537
MAPRE1	sp|Q15691|MARE1-HUMAN	0.146908	0.193631	0.395284	0.706571
DLG2	sp|Q15700-2|DLG2-HUMAN	0.0032856	0.00635148	0.237557	0.561125
TSC22D1	sp|Q15714|T22D1-HUMAN	2.04565e-08	1.28845e-07	0.00364561	0.054512
IPO8	sp|O15397|IPO8-HUMAN	2.84442e-09	2.39311e-08	0.358683	0.679876
ELAVL1	sp|Q15717-2|ELAV1-HUMAN	1.23417e-09	1.17327e-08	0.0704335	0.299118
ELF2	sp|Q15723|ELF2-HUMAN	0.377571	0.443401	0.195452	0.51117
NSDHL	sp|Q15738|NSDHL-HUMAN	2.74828e-06	1.01449e-05	0.018694	0.143052
NAB2	sp|Q15742|NAB2-HUMAN	9.78412e-14	8.21035e-12	0.372412	0.689446
MYLK	sp|Q15746-2|MYLK-HUMAN	2.34496e-06	8.80769e-06	0.015105	0.126702
MYLK	sp|Q15746|MYLK-HUMAN	2.80768e-21	2.58896e-17	0.00170658	0.0337101
SLC1A5	sp|Q15758|AAAT-HUMAN	0.00348011	0.00670919	0.653779	0.871918
MAPK11	sp|Q15759|MK11-HUMAN	1.68384e-09	1.54035e-08	0.0782655	0.315974
SPEG	sp|Q15772|SPEG-HUMAN	0.86647	0.890069	0.0286641	0.183955
TOMM34	sp|Q15785|TOM34-HUMAN	2.66792e-08	1.6292e-07	0.111934	0.379184
STX7	sp|O15400|STX7-HUMAN	1.3551e-09	1.26743e-08	0.324236	0.647139
NCOA1	sp|Q15788|NCOA1-HUMAN	0.128181	0.171497	0.07122	0.300558
SMAD2	sp|Q15796|SMAD2-HUMAN	0.966756	0.972345	0.0418891	0.226283
SMAD1	sp|Q15797|SMAD1-HUMAN	0.0543956	0.0799334	0.267867	0.594609
MSMO1	sp|Q15800|MSMO1-HUMAN	0.347843	0.413226	0.0102942	0.100984
ITSN1	sp|Q15811-2|ITSN1-HUMAN	4.21473e-12	1.18405e-10	0.0596627	0.275395
TBCE	sp|Q15813|TBCE-HUMAN	0.0512901	0.0757319	0.801651	0.938085
TBCC	sp|Q15814|TBCC-HUMAN	0.849006	0.875109	0.389469	0.703486
NPTX1	sp|Q15818|NPTX1-HUMAN	0.394078	0.459683	0.0221662	0.157469
UBE2V2	sp|Q15819|UB2V2-HUMAN	0.195296	0.248629	0.827682	0.945687
STXBP2	sp|Q15833-3|STXB2-HUMAN	0.000295509	0.000709052	0.935292	0.981011
SLC16A6	sp|O15403|MOT7-HUMAN	0.00977849	0.0171486	0.554505	0.820193
CCDC85B	sp|Q15834|CC85B-HUMAN	0.180161	0.232014	0.344754	0.666312
VAMP3	sp|Q15836|VAMP3-HUMAN	2.64082e-07	1.23359e-06	0.239791	0.563629
ADIRF	sp|Q15847|ADIRF-HUMAN	1.05456e-05	3.40597e-05	0.00373775	0.0550388
USF2	sp|Q15853|USF2-HUMAN	0.0265643	0.0420731	0.00129968	0.0275503
SCN9A	sp|Q15858|SCN9A-HUMAN	0.000161216	0.000407614	0.026388	0.175939
ATP6AP1	sp|Q15904|VAS1-HUMAN	6.83857e-06	2.29681e-05	0.110358	0.377033
VPS72	sp|Q15906-2|VPS72-HUMAN	0.010258	0.0179282	0.0343355	0.202694
RAB11B	sp|Q15907|RB11B-HUMAN	4.54073e-06	1.589e-05	0.369895	0.687238
EZH2	sp|Q15910-2|EZH2-HUMAN	6.69386e-05	0.000183922	0.349727	0.671281
ZFHX3	sp|Q15911|ZFHX3-HUMAN	2.07427e-11	4.00143e-10	0.293618	0.619264
TNRC18	sp|O15417|TNC18-HUMAN	0.00753873	0.0135453	0.899149	0.969714
ZYX	sp|Q15942|ZYX-HUMAN	0.00233389	0.00464812	0.353771	0.675956
ETFDH	sp|Q16134|ETFD-HUMAN	3.64209e-12	1.06954e-10	0.71707	0.901944
2021-09-07	sp|Q16181|SEPT7-HUMAN	7.06903e-05	0.000193022	0.929955	0.979044
ADRM1	sp|Q16186|ADRM1-HUMAN	0.00920254	0.0162157	0.859613	0.95592
UAP1	sp|Q16222|UAP1-HUMAN	2.9914e-05	8.8268e-05	0.182702	0.493611
E2F4	sp|Q16254|E2F4-HUMAN	0.617885	0.670928	0.65219	0.871698
IGFBP7	sp|Q16270|IBP7-HUMAN	4.24682e-13	2.2e-11	0.0783789	0.316008
PDCD2	sp|Q16342|PDCD2-HUMAN	0.000369976	0.000870294	0.135713	0.419656
INA	sp|Q16352|AINX-HUMAN	0.978913	0.983178	0.330337	0.652984
EXT1	sp|Q16394|EXT1-HUMAN	0.00249332	0.00493578	0.198606	0.515727
SLC16A3	sp|O15427|MOT4-HUMAN	3.09012e-10	3.75415e-09	0.324114	0.647139
PSMD5	sp|Q16401|PSMD5-HUMAN	0.137176	0.182184	0.0297986	0.188459
PKN1	sp|Q16512-2|PKN1-HUMAN	0.059913	0.0871659	0.111414	0.378075
PKN2	sp|Q16513|PKN2-HUMAN	0.163456	0.212885	0.833554	0.947671
TAF12	sp|Q16514|TAF12-HUMAN	0.0341273	0.0526234	0.752159	0.917173
DDB1	sp|Q16531|DDB1-HUMAN	0.0239396	0.0383841	0.0351748	0.20583
PCSK7	sp|Q16549|PCSK7-HUMAN	0.914974	0.930925	0.870625	0.959722
SNRNP35	sp|Q16560-2|U1SBP-HUMAN	2.84202e-05	8.42104e-05	0.112777	0.380344
SYPL1	sp|Q16563|SYPL1-HUMAN	0.00114926	0.00244911	0.2963	0.620494
CAMK4	sp|Q16566|KCC4-HUMAN	5.15607e-10	5.78396e-09	0.226454	0.547922
RBBP7	sp|Q16576-2|RBBP7-HUMAN	1.47233e-10	2.00833e-09	0.496545	0.78388
ABCC3	sp|O15438-4|MRP3-HUMAN	0.00829359	0.0147864	0.00763817	0.0850622
TAF9	sp|Q16594|TAF9-HUMAN	0.0015435	0.00320627	0.985273	0.995314
FXN	sp|Q16595|FRDA-HUMAN	0.296203	0.358813	0.994866	0.998234
ECM1	sp|Q16610-4|ECM1-HUMAN	0.11844	0.160083	0.0102915	0.100984
CTF1	sp|Q16619|CTF1-HUMAN	7.80157e-05	0.000210901	0.917971	0.974886
STX1A	sp|Q16623|STX1A-HUMAN	0.191681	0.24467	0.9562	0.988213
MEA1	sp|Q16626|MEA1-HUMAN	0.462718	0.525976	0.438582	0.743275
SRSF7	sp|Q16629|SRSF7-HUMAN	1.85138e-08	1.17824e-07	0.293986	0.619264
CPSF6	sp|Q16630-2|CPSF6-HUMAN	5.04425e-07	2.18679e-06	0.302162	0.626404
DBN1	sp|Q16643-3|DREB-HUMAN	2.1163e-07	1.01584e-06	0.00276434	0.0464712
MAPKAPK3	sp|Q16644|MAPK3-HUMAN	6.20407e-06	2.10477e-05	0.0128038	0.115636
ABCC4	sp|O15439|MRP4-HUMAN	6.14516e-11	9.92373e-10	0.365166	0.684469
NFIL3	sp|Q16649|NFIL3-HUMAN	4.03416e-07	1.79013e-06	0.104375	0.367004
NRF1	sp|Q16656-4|NRF1-HUMAN	0.00428547	0.00808105	0.266146	0.593069
FSCN1	sp|Q16658|FSCN1-HUMAN	0.282294	0.343952	0.0189627	0.143712
IFI16	sp|Q16666|IF16-HUMAN	1.52589e-08	9.99304e-08	3.31445e-05	0.00218304
MAN2A1	sp|Q16706|MA2A1-HUMAN	0.0121311	0.0208463	0.0997884	0.360265
NDUFA5	sp|Q16718|NDUA5-HUMAN	0.000481796	0.00110349	0.340121	0.661623
CLPP	sp|Q16740|CLPP-HUMAN	0.026695	0.0422365	0.904857	0.970691
DGKD	sp|Q16760|DGKD-HUMAN	0.643991	0.695019	0.873468	0.960462
TST	sp|Q16762|THTR-HUMAN	3.79106e-15	6.47359e-13	0.257767	0.584105
UBE2S	sp|Q16763|UBE2S-HUMAN	1.95465e-08	1.23535e-07	0.00484544	0.0640111
ABCC5	sp|O15440|MRP5-HUMAN	0.00185844	0.0037913	0.365208	0.684469
GUK1	sp|Q16774-2|KGUA-HUMAN	5.40946e-07	2.33087e-06	0.140046	0.42711
HAGH	sp|Q16775|GLO2-HUMAN	2.50039e-10	3.14544e-09	0.878101	0.961714
NDUFA9	sp|Q16795|NDUA9-HUMAN	0.000764436	0.00168795	0.0229403	0.160861
ME3	sp|Q16798|MAON-HUMAN	0.0851996	0.11956	0.186459	0.498215
RTN1	sp|Q16799|RTN1-HUMAN	0.0149681	0.0252139	0.00291413	0.0477505
PTPN21	sp|Q16825|PTN21-HUMAN	0.999335	0.999335	0.0871649	0.335174
UPP1	sp|Q16831|UPP1-HUMAN	0.000320465	0.000762582	0.00180165	0.0349748
ATP6V1F	sp|Q16864-2|VATF-HUMAN	3.29807e-07	1.49516e-06	0.0277626	0.180824
PFKFB3	sp|Q16875-4|F263-HUMAN	0.000770296	0.00169967	0.086123	0.333108
PFKFB4	sp|Q16877|F264-HUMAN	0.00955623	0.0167844	0.525505	0.801746
ISPD	sp|A4D126|ISPD-HUMAN	0.858305	0.882716	0.121098	0.396113
CD3EAP	sp|O15446-2|RPA34-HUMAN	3.54623e-12	1.05483e-10	0.669611	0.878555
CDO1	sp|Q16878|CDO1-HUMAN	0.00268088	0.00527087	0.761064	0.921048
TXNRD1	sp|Q16881|TRXR1-HUMAN	2.00253e-09	1.78237e-08	0.617912	0.853598
IMMT	sp|Q16891-2|MIC60-HUMAN	0.0579151	0.0845097	0.627561	0.857989
IMMT	sp|Q16891-4|MIC60-HUMAN	6.04411e-07	2.57147e-06	0.204956	0.526142
TATDN3	sp|Q17R31-3|TATD3-HUMAN	0.0387496	0.0589523	0.904397	0.970683
ZNF827	sp|Q17R98|ZN827-HUMAN	0.00132901	0.00279662	0.857222	0.9552
FAM127C	sp|Q17RB0|F127C-HUMAN	0.03075	0.0479935	0.00632981	0.0755074
KNOP1	sp|Q1ED39|KNOP1-HUMAN	5.29749e-07	2.28476e-06	0.232363	0.555128
HNRNPUL2	sp|Q1KMD3|HNRL2-HUMAN	4.86323e-09	3.77156e-08	0.81908	0.944216
CSPP1	sp|Q1MSJ5|CSPP1-HUMAN	0.273769	0.334982	0.923989	0.977098
P4HA2	sp|O15460|P4HA2-HUMAN	8.6757e-14	7.59101e-12	0.0139241	0.121441
BMT2	sp|Q1RMZ1|BMT2-HUMAN	0.723427	0.76675	0.0139723	0.121613
TMEM132A	sp|Q24JP5-2|T132A-HUMAN	3.3456e-08	1.97755e-07	0.158856	0.457897
INF2	sp|Q27J81|INF2-HUMAN	2.9024e-07	1.33682e-06	0.0987884	0.358069
KIAA0753	sp|Q2KHM9|MOONR-HUMAN	0.022274	0.0359323	0.425914	0.732168
RFX7	sp|Q2KHR2|RFX7-HUMAN	0.0368559	0.056369	0.581195	0.834633
QSER1	sp|Q2KHR3|QSER1-HUMAN	6.33645e-09	4.71196e-08	0.755273	0.919268
CLEC16A	sp|Q2KHT3|CL16A-HUMAN	0.257695	0.317463	0.0781148	0.315906
KIAA1109	sp|Q2LD37|K1109-HUMAN	0.00183235	0.00374635	0.00200951	0.0375095
KIF7	sp|Q2M1P5|KIF7-HUMAN	0.00693549	0.0125421	0.322477	0.645837
ARHGAP31	sp|Q2M1Z3|RHG31-HUMAN	0.140963	0.186675	0.452367	0.75258
GYG2	sp|O15488|GLYG2-HUMAN	7.46054e-06	2.48352e-05	0.030838	0.191615
MTHFSD	sp|Q2M296-3|MTHSD-HUMAN	0.00608031	0.0111001	0.182228	0.492763
AAK1	sp|Q2M2I8|AAK1-HUMAN	1.37124e-07	6.94354e-07	0.444546	0.748339
SHROOM1	sp|Q2M3G4|SHRM1-HUMAN	0.510848	0.572848	0.964476	0.989982
TCTN1	sp|Q2MV58-2|TECT1-HUMAN	0.0495193	0.0733287	0.883262	0.96431
ERCC6L	sp|Q2NKX8|ERC6L-HUMAN	7.8705e-10	8.11788e-09	0.554128	0.820031
TSR1	sp|Q2NL82|TSR1-HUMAN	1.22557e-08	8.30347e-08	0.452064	0.75258
RALGAPA2	sp|Q2PPJ7|RGPA2-HUMAN	0.018197	0.0299367	0.964718	0.990057
TYSND1	sp|Q2T9J0|TYSD1-HUMAN	0.183582	0.235801	0.391207	0.704896
TMEM44	sp|Q2T9K0|TMM44-HUMAN	0.563401	0.620535	0.0637937	0.285245
IAH1	sp|Q2TAA2|IAH1-HUMAN	2.62071e-07	1.22543e-06	0.413765	0.722063
YKT6	sp|O15498|YKT6-HUMAN	5.96974e-06	2.03598e-05	0.109473	0.376339
ALG11	sp|Q2TAA5|ALG11-HUMAN	6.07362e-05	0.000168334	0.371271	0.688687
TUSC1	sp|Q2TAM9|TUSC1-HUMAN	0.00190807	0.0038848	0.691523	0.888169
ATG2A	sp|Q2TAZ0-3|ATG2A-HUMAN	0.000280259	0.000676865	0.000756524	0.0190523
ZNF800	sp|Q2TB10|ZN800-HUMAN	0.0220578	0.0356147	0.613122	0.850165
CWF19L2	sp|Q2TBE0|C19L2-HUMAN	0.635362	0.687799	0.264601	0.591125
FHOD3	sp|Q2V2M9-4|FHOD3-HUMAN	0.00185003	0.00377665	0.788476	0.932284
AP5B1	sp|Q2VPB7|AP5B1-HUMAN	0.621135	0.674297	0.877669	0.961505
CTU2	sp|Q2VPK5|CTU2-HUMAN	0.088135	0.123191	0.500122	0.785159
UVSSA	sp|Q2YD98|UVSSA-HUMAN	0.650612	0.70118	0.290647	0.617525
HFE	sp|Q30201|HFE-HUMAN	0.327808	0.391924	0.817445	0.944216
ARPC5	sp|O15511|ARPC5-HUMAN	0.00175543	0.00360508	0.452381	0.75258
HLA-B	sp|Q31612|1B73-HUMAN	0.586769	0.642589	0.312868	0.637419
ANO4	sp|Q32M45|ANO4-HUMAN	0.836708	0.864749	0.300616	0.624602
LRRFIP1	sp|Q32MZ4-4|LRRF1-HUMAN	0.000158723	0.000401974	0.000191639	0.00742481
LRRFIP1	sp|Q32MZ4|LRRF1-HUMAN	0.00160307	0.00331655	0.825876	0.944957
PGS1	sp|Q32NB8|PGPS1-HUMAN	7.49659e-05	0.000203372	0.939112	0.982589
P3H1	sp|Q32P28|P3H1-HUMAN	1.13586e-09	1.0933e-08	0.477467	0.770626
TRMT5	sp|Q32P41|TRM5-HUMAN	1.06554e-05	3.43664e-05	0.186384	0.498157
NDUFAF6	sp|Q330K2|NDUF6-HUMAN	0.0026427	0.00520254	0.46757	0.763496
LRRK1	sp|Q38SD2|LRRK1-HUMAN	0.930183	0.942448	0.41757	0.723627
TWISTNB	sp|Q3B726|RPA43-HUMAN	1.05368e-09	1.02443e-08	0.0243651	0.166609
CLOCK	sp|O15516|CLOCK-HUMAN	0.0277705	0.0437804	0.821687	0.94447
EDRF1	sp|Q3B7T1|EDRF1-HUMAN	0.317993	0.381848	0.853789	0.953613
MAP7D1	sp|Q3KQU3-4|MA7D1-HUMAN	0.000616548	0.00138191	0.0423384	0.227656
MAP7D1	sp|Q3KQU3|MA7D1-HUMAN	0.036254	0.0555128	0.970194	0.991456
UAP1L1	sp|Q3KQV9|UAP1L-HUMAN	0.00208519	0.00420918	0.0128987	0.115925
ALKBH6	sp|Q3KRA9-2|ALKB6-HUMAN	0.46832	0.531296	0.394698	0.706566
CHD9	sp|Q3L8U1|CHD9-HUMAN	7.3809e-05	0.000200587	0.876652	0.961261
ITPRIPL2	sp|Q3MIP1|IPIL2-HUMAN	0.434743	0.499286	0.827807	0.945687
ADCK5	sp|Q3MIX3|ADCK5-HUMAN	0.000922846	0.00200131	0.641922	0.8655
HSDL1	sp|Q3SXM5|HSDL1-HUMAN	1.16256e-07	6.00559e-07	0.100618	0.361433
BBS9	sp|Q3SYG4-3|PTHB1-HUMAN	0.00559397	0.0103102	0.235704	0.55903
OGG1	sp|O15527-4|OGG1-HUMAN	0.561055	0.618395	0.663173	0.875069
GON4L	sp|Q3T8J9|GON4L-HUMAN	0.275479	0.336762	0.130535	0.412561
GNPTAB	sp|Q3T906|GNPTA-HUMAN	0.81131	0.842465	0.377921	0.694185
CCDC88A	sp|Q3V6T2|GRDN-HUMAN	0.458117	0.521518	0.589084	0.839258
RABL6	sp|Q3YEC7-2|RABL6-HUMAN	0.000332508	0.000788391	0.515135	0.79499
VMA21	sp|Q3ZAQ7-2|VMA21-HUMAN	0.0496205	0.0734667	0.0704536	0.299118
TIMM50	sp|Q3ZCQ8-2|TIM50-HUMAN	0.318725	0.382481	0.106231	0.371466
PARP14	sp|Q460N5|PAR14-HUMAN	0.106334	0.145433	0.435584	0.740753
PLEKHN1	sp|Q494U1|PKHN1-HUMAN	0.445654	0.509722	0.95461	0.987506
FUT11	sp|Q495W5|FUT11-HUMAN	0.801994	0.835426	0.966899	0.9907
CCDC14	sp|Q49A88|CCD14-HUMAN	0.00272793	0.00535768	0.870806	0.959722
PDPK1	sp|O15530|PDPK1-HUMAN	1.01811e-06	4.13206e-06	0.0360408	0.207941
CDNF	sp|Q49AH0|CDNF-HUMAN	3.02911e-05	8.93234e-05	0.0483838	0.244866
TTC31	sp|Q49AM3|TTC31-HUMAN	0.0444432	0.0666034	0.52397	0.800917
COX19	sp|Q49B96|COX19-HUMAN	0.227788	0.285191	0.618099	0.853681
C2CD3	sp|Q4AC94|C2CD3-HUMAN	0.771042	0.809033	0.4762	0.769817
RIC1	sp|Q4ADV7|RIC1-HUMAN	0.00016092	0.000406978	0.869878	0.959568
GTDC1	sp|Q4AE62|GTDC1-HUMAN	4.82581e-06	1.67857e-05	0.243821	0.569342
KMT5B	sp|Q4FZB7|KMT5B-HUMAN	0.0926742	0.128717	0.575273	0.83166
FAM188B	sp|Q4G0A6|F188B-HUMAN	0.598408	0.653317	0.183971	0.49501
LARP7	sp|Q4G0J3-3|LARP7-HUMAN	6.28474e-09	4.68107e-08	0.933698	0.98026
NADK2	sp|Q4G0N4|NAKD2-HUMAN	2.7051e-08	1.64631e-07	0.871673	0.959722
RNF113A	sp|O15541|R113A-HUMAN	0.0233724	0.037553	0.131969	0.414471
KCTD21	sp|Q4G0X4|KCD21-HUMAN	0.0039962	0.00760085	0.456116	0.755193
GXYLT1	sp|Q4G148|GXLT1-HUMAN	0.111006	0.151038	0.0556574	0.265778
ACSF3	sp|Q4G176|ACSF3-HUMAN	0.000118027	0.000305968	0.172565	0.477413
PREPL	sp|Q4J6C6|PPCEL-HUMAN	0.0121223	0.020835	0.185974	0.49764
TBC1D10B	sp|Q4KMP7|TB10B-HUMAN	0.551113	0.609737	0.115021	0.384698
TPRN	sp|Q4KMQ1|TPRN-HUMAN	0.0302252	0.0472722	0.719912	0.902226
ANO6	sp|Q4KMQ2-2|ANO6-HUMAN	4.55866e-05	0.000129819	0.437622	0.742981
PLCH1	sp|Q4KWH8|PLCH1-HUMAN	0.935535	0.947038	0.925013	0.977234
FILIP1L	sp|Q4L180|FIL1L-HUMAN	0.000425403	0.000984599	0.117452	0.389342
SVEP1	sp|Q4LDE5|SVEP1-HUMAN	1.99343e-10	2.58529e-09	0.00354517	0.0536782
DHX15	sp|O43143|DHX15-HUMAN	6.94232e-13	3.138e-11	0.099922	0.360265
DNAL1	sp|Q4LDG9|DNAL1-HUMAN	0.829477	0.858622	0.589331	0.839258
MRPL51	sp|Q4U2R6|RM51-HUMAN	0.00919245	0.0162041	0.0065341	0.0768506
TMEM119	sp|Q4V9L6|TM119-HUMAN	4.97843e-05	0.000140386	0.48549	0.776732
BCL7A	sp|Q4VC05-2|BCL7A-HUMAN	6.04216e-05	0.000167563	0.022505	0.159045
CCDC58	sp|Q4VC31|CCD58-HUMAN	0.0205167	0.0333835	0.156035	0.453309
AMOT	sp|Q4VCS5|AMOT-HUMAN	0.925754	0.938952	0.0609835	0.278198
TIGD2	sp|Q4W5G0|TIGD2-HUMAN	0.000137349	0.000352196	0.771978	0.925791
TMEM259	sp|Q4ZIN3|MBRL-HUMAN	4.04181e-06	1.4351e-05	0.441285	0.745527
PAN2	sp|Q504Q3|PAN2-HUMAN	0.0349109	0.0536768	0.567412	0.827258
FAM98B	sp|Q52LJ0-2|FA98B-HUMAN	7.28486e-07	3.04781e-06	0.0363812	0.208573
GTPBP10	sp|A4D1E9|GTPBA-HUMAN	4.83429e-13	2.39661e-11	0.400941	0.711661
SGSM2	sp|O43147-2|SGSM2-HUMAN	0.571969	0.628321	0.100247	0.360811
ARHGAP29	sp|Q52LW3|RHG29-HUMAN	0.0328781	0.0509356	0.0227965	0.160341
FNDC3B	sp|Q53EP0|FND3B-HUMAN	4.32903e-06	1.52243e-05	0.695123	0.890364
CRTC2	sp|Q53ET0|CRTC2-HUMAN	0.534071	0.593762	2.636e-05	0.0019139
NCBP3	sp|Q53F19|NCBP3-HUMAN	8.92869e-06	2.93621e-05	0.849741	0.952145
MPPE1	sp|Q53F39|MPPE1-HUMAN	0.000310082	0.000740744	0.0734712	0.30618
TP53I3	sp|Q53FA7|QORX-HUMAN	2.06451e-11	4.00028e-10	0.308019	0.632224
TMEM35A	sp|Q53FP2|TM35A-HUMAN	5.86668e-08	3.25884e-07	0.0414258	0.224831
HIKESHI	sp|Q53FT3|HIKES-HUMAN	0.00158887	0.00329367	0.774182	0.926747
ORMDL2	sp|Q53FV1|ORML2-HUMAN	0.773636	0.811477	0.474242	0.767459
KLHL12	sp|Q53G59-2|KLH12-HUMAN	0.30531	0.368441	0.0744544	0.308144
RNMT	sp|O43148-2|MCES-HUMAN	4.85972e-08	2.75933e-07	0.793717	0.934023
PHLDA2	sp|Q53GA4|PHLA2-HUMAN	0.926085	0.939018	0.655794	0.872972
PDLIM3	sp|Q53GG5-2|PDLI3-HUMAN	0.506614	0.569069	0.354554	0.675984
HSD17B12	sp|Q53GQ0|DHB12-HUMAN	4.21762e-07	1.86347e-06	0.00807716	0.0879333
GLE1	sp|Q53GS7|GLE1-HUMAN	3.02779e-06	1.10484e-05	0.485516	0.776732
USP39	sp|Q53GS9|SNUT2-HUMAN	9.61541e-14	8.2096e-12	0.29399	0.619264
KLHL22	sp|Q53GT1|KLH22-HUMAN	0.824426	0.854292	0.160582	0.460408
AGK	sp|Q53H12|AGK-HUMAN	7.93406e-05	0.000213981	0.46645	0.762042
SETMAR	sp|Q53H47|SETMR-HUMAN	0.00829917	0.0147906	0.548641	0.816629
AKIRIN2	sp|Q53H80|AKIR2-HUMAN	0.00544744	0.0100623	0.781644	0.929766
LACTB2	sp|Q53H82|LACB2-HUMAN	1.7835e-06	6.84215e-06	0.0683351	0.295241
ZZEF1	sp|O43149|ZZEF1-HUMAN	9.35048e-06	3.05747e-05	0.763101	0.921223
CCDC92	sp|Q53HC0|CCD92-HUMAN	0.00075979	0.00167809	0.00255391	0.0440773
KLHL26	sp|Q53HC5|KLH26-HUMAN	0.0270653	0.0427637	0.0567717	0.26832
CDCA8	sp|Q53HL2|BOREA-HUMAN	1.6156e-11	3.34024e-10	0.307644	0.632217
SOWAHC	sp|Q53LP3|SWAHC-HUMAN	0.00781131	0.0140078	0.194218	0.509216
FASTKD1	sp|Q53R41|FAKD1-HUMAN	0.276464	0.337787	0.833856	0.947671
ANKRD39	sp|Q53RE8|ANR39-HUMAN	0.00461309	0.00864403	0.000220478	0.00803568
BOLA3	sp|Q53S33|BOLA3-HUMAN	0.347764	0.413185	0.0582417	0.271647
COBLL1	sp|Q53SF7|COBL1-HUMAN	1.14485e-06	4.58386e-06	0.052654	0.257163
HS1BP3	sp|Q53T59|H1BP3-HUMAN	0.00468804	0.00876993	0.845802	0.951327
TAF1B	sp|Q53T94|TAF1B-HUMAN	0.032217	0.0499955	0.957627	0.988494
ASAP2	sp|O43150|ASAP2-HUMAN	5.92564e-11	9.60287e-10	0.019245	0.14522
CYBRD1	sp|Q53TN4|CYBR1-HUMAN	6.96389e-05	0.000190433	0.0330325	0.199021
WDR81	sp|Q562E7|WDR81-HUMAN	0.0415495	0.0627461	0.496452	0.78388
SGO2	sp|Q562F6|SGO2-HUMAN	4.4278e-05	0.000126405	0.705604	0.895825
ACTBL2	sp|Q562R1|ACTBL-HUMAN	0.855864	0.880697	0.291837	0.61821
CCDC93	sp|Q567U6|CCD93-HUMAN	0.00069971	0.00155396	0.411073	0.719847
PRR16	sp|Q569H4|LARGN-HUMAN	0.542276	0.601647	0.809616	0.941692
EAPP	sp|Q56P03|EAPP-HUMAN	0.00111455	0.00237844	0.0780853	0.315906
OCIAD2	sp|Q56VL3|OCAD2-HUMAN	0.00514703	0.00953984	1.20411e-07	3.30865e-05
SFT2D3	sp|Q587I9|SFT2C-HUMAN	1.23149e-07	6.32269e-07	0.0667859	0.292286
PAN3	sp|Q58A45|PAN3-HUMAN	0.0437868	0.0657801	0.499487	0.784629
TTI1	sp|O43156|TTI1-HUMAN	0.00375187	0.00718056	0.208398	0.528503
NAALADL2	sp|Q58DX5|NADL2-HUMAN	2.55182e-11	4.69668e-10	0.944558	0.983854
HSP90AA4P	sp|Q58FG1|HS904-HUMAN	0.095743	0.13252	0.773723	0.926438
DCAF6	sp|Q58WW2-3|DCAF6-HUMAN	0.000120289	0.000311393	0.46355	0.760532
TMEM97	sp|Q5BJF2|TMM97-HUMAN	0.176885	0.228215	0.942482	0.983514
ODF2	sp|Q5BJF6|ODFP2-HUMAN	5.17839e-10	5.80194e-09	0.664475	0.875177
YIF1B	sp|Q5BJH7|YIF1B-HUMAN	0.800273	0.833915	0.771251	0.925757
MURC	sp|Q5BKX8|MURC-HUMAN	0.0736917	0.105009	0.0127192	0.115097
ZNF326	sp|Q5BKZ1|ZN326-HUMAN	2.43049e-05	7.31449e-05	0.0496587	0.24928
NOM1	sp|Q5C9Z4|NOM1-HUMAN	3.13864e-10	3.79808e-09	0.460678	0.758523
MEST	sp|Q5EB52|MEST-HUMAN	7.09132e-07	2.97223e-06	0.0176091	0.138426
PLXNB1	sp|O43157|PLXB1-HUMAN	8.66428e-13	3.6481e-11	0.985548	0.995429
RILPL1	sp|Q5EBL4|RIPL1-HUMAN	1.00655e-11	2.3088e-10	0.00272938	0.0461792
PDZD11	sp|Q5EBL8-2|PDZ11-HUMAN	0.027762	0.0437745	0.147675	0.440366
CARD16	sp|Q5EG05|CAR16-HUMAN	2.9046e-10	3.57587e-09	0.526555	0.802009
DNAJC21	sp|Q5F1R6-2|DJC21-HUMAN	0.286047	0.347836	0.166761	0.46867
PRRT3	sp|Q5FWE3|PRRT3-HUMAN	0.165087	0.214858	0.663877	0.875069
ARSJ	sp|Q5FYB0|ARSJ-HUMAN	0.601297	0.655643	0.357359	0.679084
TNFAIP8L3	sp|Q5GJ75|TP8L3-HUMAN	0.303765	0.366865	0.785474	0.931318
HERC4	sp|Q5GLZ8|HERC4-HUMAN	0.0417901	0.0630681	0.795544	0.934478
PIGG	sp|Q5H8A4|PIGG-HUMAN	0.440101	0.504685	0.103107	0.365901
PPP6R3	sp|Q5H9R7-5|PP6R3-HUMAN	0.458785	0.522214	0.191636	0.505268
RRP8	sp|O43159|RRP8-HUMAN	3.21958e-12	9.83037e-11	0.0952676	0.352513
MTX3	sp|Q5HYI7|MTX3-HUMAN	0.213433	0.268825	0.117512	0.389342
RABL3	sp|Q5HYI8|RABL3-HUMAN	0.249654	0.309167	0.0601307	0.276449
FAM76B	sp|Q5HYJ3|FA76B-HUMAN	7.65284e-06	2.54112e-05	0.688654	0.887254
COQ5	sp|Q5HYK3|COQ5-HUMAN	0.0468817	0.0697928	0.102661	0.365074
EMC4	sp|Q5J8M3|EMC4-HUMAN	0.0022871	0.00456184	0.332576	0.655286
NOMO2	sp|Q5JPE7|NOMO2-HUMAN	0.538396	0.597851	0.463	0.760071
EARS2	sp|Q5JPH6-2|SYEM-HUMAN	1.86652e-05	5.73707e-05	0.365523	0.68472
C3orf38	sp|Q5JPI3|CC038-HUMAN	0.000423994	0.000982571	0.0322727	0.196947
METTL10	sp|Q5JPI9|MET10-HUMAN	0.0739252	0.105325	0.152075	0.447158
MIA3	sp|Q5JRA6|MIA3-HUMAN	2.04779e-05	6.24885e-05	2.40118e-05	0.00178033
SIPA1L1	sp|O43166|SI1L1-HUMAN	0.348717	0.414104	0.881815	0.963636
WDR44	sp|Q5JSH3|WDR44-HUMAN	1.49025e-09	1.38245e-08	0.0957831	0.353425
FGD3	sp|Q5JSP0|FGD3-HUMAN	0.509961	0.572062	0.517531	0.79682
PRRC2B	sp|Q5JSZ5|PRC2B-HUMAN	0.768926	0.806996	0.883029	0.964283
TJAP1	sp|Q5JTD0|TJAP1-HUMAN	0.024205	0.0387558	0.00875629	0.09234
RRP12	sp|Q5JTH9|RRP12-HUMAN	2.3774e-20	1.0961e-16	0.12141	0.396713
COA6	sp|Q5JTJ3-2|COA6-HUMAN	0.207762	0.262651	0.0970529	0.355693
TOR1AIP1	sp|Q5JTV8-3|TOIP1-HUMAN	5.93919e-05	0.000164856	0.0136897	0.120221
CEP78	sp|Q5JTW2-2|CEP78-HUMAN	6.10947e-06	2.0788e-05	0.0829588	0.325516
AARS2	sp|Q5JTZ9|SYAM-HUMAN	7.30139e-05	0.000198719	0.0671149	0.293024
TOR2A	sp|Q5JU69|TOR2A-HUMAN	0.0960235	0.132848	0.190578	0.503887
PHGDH	sp|O43175|SERA-HUMAN	3.55226e-11	6.22726e-10	0.820286	0.944216
IQSEC2	sp|Q5JU85-2|IQEC2-HUMAN	0.0174871	0.0288976	0.619331	0.854195
TEX30	sp|Q5JUR7|TEX30-HUMAN	0.00445973	0.00838393	0.306244	0.63061
FRMPD3	sp|Q5JV73|FRPD3-HUMAN	0.950207	0.959471	0.0727876	0.304387
PCID2	sp|Q5JVF3|PCID2-HUMAN	6.46416e-07	2.73548e-06	0.320398	0.644641
HABP4	sp|Q5JVS0|HABP4-HUMAN	0.0356432	0.0547138	0.8338	0.947671
GNAS	sp|Q5JWF2-2|GNAS1-HUMAN	0.611032	0.664582	0.28664	0.613392
GNAS	sp|Q5JWF2|GNAS1-HUMAN	0.0042757	0.00806757	0.062845	0.282572
SAMD9	sp|Q5K651|SAMD9-HUMAN	6.13322e-11	9.92183e-10	0.375533	0.692123
COLEC12	sp|Q5KU26|COL12-HUMAN	2.92629e-06	1.07162e-05	0.00444297	0.0608915
WDR45B	sp|Q5MNZ6|WIPI3-HUMAN	0.146492	0.193166	0.825482	0.944857
IRAK2	sp|O43187|IRAK2-HUMAN	0.297136	0.359801	0.455304	0.754693
EOGT	sp|Q5NDL2|EOGT-HUMAN	0.000414637	0.000963066	0.000488913	0.0141325
SAMD4B	sp|Q5PRF9|SMAG2-HUMAN	0.880768	0.902745	0.907876	0.971681
BRMS1L	sp|Q5PSV4|BRM1L-HUMAN	0.00126304	0.00266999	0.292356	0.618647
TBCEL	sp|Q5QJ74|TBCEL-HUMAN	5.02104e-07	2.17775e-06	0.235626	0.55903
DNTTIP2	sp|Q5QJE6|TDIF2-HUMAN	5.3204e-11	8.74499e-10	0.647487	0.869185
DCAF10	sp|Q5QP82|DCA10-HUMAN	0.027535	0.0434462	0.555373	0.820894
RABGAP1L	sp|Q5R372-5|RBG1L-HUMAN	0.0309253	0.0482263	0.605111	0.846025
ELFN2	sp|Q5R3F8|PPR29-HUMAN	0.00106475	0.00228115	0.670791	0.879019
TTC38	sp|Q5R3I4|TTC38-HUMAN	0.142654	0.188589	0.379553	0.69552
[truncated: 7,222 more rows]

## Sheet: PDL25
pathway	pval	padj	log2err	ES	NES	size	leadingEdge
HALLMARK_ADIPOGENESIS	4.70457e-05	0.000288155	0.557332	0.395031	1.8269	127	CD36, ITGA7, PLIN2, TST, CRAT, PQLC3, TANK, DGAT1, COL4A1, SCARB1, BCL2L13, HSPB8, DHRS7B, PGM1, ACLY, ENPP2, NDUFB7, MIGA2, ME1, CMPK1, MYLK, CMBL, LAMA4, PEX14, MCCC1, CPT2, DNAJB9, RETSAT, ECH1, NKIRAS1, DBT, MGST3, ETFB, FAH, SNCG, NMT1, ITSN1, SCP2, RREB1, FABP4, ALDH2, DECR1, AK2, ABCA1, CAT, PHLDB1, DHRS7, ACO2, IDH3G, AIFM1, ANGPT1, UQCRQ, REEP5, SDHB, PREB, NDUFAB1
HALLMARK_ALLOGRAFT_REJECTION	0.518325	0.651228	0.0919686	0.243654	0.971203	60	CDKN2A, EREG, IL18, CCND3, HDAC9, BCL10, THY1, LYN, ABI1, BCAT1, FLNA, IKBKB
HALLMARK_ANDROGEN_RESPONSE	0.730645	0.795591	0.0501934	-0.226307	-0.850602	58	H1F0, FKBP5, SLC38A2, XRCC6, HMGCR, FADS1, ZBTB10, UBE2I, XRCC5, ARID5B, STK39, ALDH1A3
HALLMARK_ANGIOGENESIS	0.178654	0.257472	0.158514	0.422836	1.25334	17	LUM, COL5A2, JAG1, FSTL1, LRPAP1, S100A4, COL3A1
HALLMARK_APICAL_JUNCTION	0.00310125	0.00949757	0.431708	0.342481	1.54424	112	ICAM5, MAPK11, CRAT, RAC2, CERCAM, RRAS, LDLRAP1, SHROOM2, ACTN1, CNN2, EVL, FBN1, NEXN, LIMA1, THY1, IRS1, IKBKG, ZYX, LAMA3, SPEG, MVD, CTNND1, SRC, CDH4, LAMB3, VASP, INPPL1, ITGA3, PARVA, TSC1, RSU1, BAIAP2, ADAM23, FLNC, NF1, PIK3CB, MPP5, TRAF1, ARPC2, SIRPA, NF2, TRO, ACTN4, MPZL1, EPB41L2, STX4, GNAI2, TNFRSF11B, LAYN, EXOC4, NEGR1, ACTN3, PTK2
HALLMARK_APICAL_SURFACE	0.0928074	0.152444	0.224966	0.473939	1.40481	17	ATP6V0A4, SLC34A3, SHROOM2, THY1, GSTM3, LYN
HALLMARK_APOPTOSIS	0.15864	0.235557	0.188204	0.26402	1.1635	99	GSN, PEA15, EREG, LUM, SPTAN1, CCND1, IL18, CAV1, PPP2R5B, PSEN2, PMAIP1, GPX1, BCL10, PPT1, CDKN1A, TXNIP, RETSAT, CASP3, PLAT, PAK1, DNM1L, DCN, ANKH, CYLD
HALLMARK_BILE_ACID_METABOLISM	0.394402	0.522316	0.10673	0.269092	1.0392	54	SLC22A18, ABCD1, ABCA2, PRDX5, ACSL5, AR, OPTN, PEX19, RETSAT, GSTK1, HSD17B4, ALDH9A1, MLYCD, SCP2, DHCR24, ABCA1, CAT, PEX13
HALLMARK_CHOLESTEROL_HOMEOSTASIS	0.192118	0.268966	0.157403	0.309027	1.18638	51	FBXO6, TM7SF2, ABCA2, LGMN, JAG1, ETHE1, PCYT2, MVK, CD9, GSTM2, ECH1, MVD, ALCAM, ACSS2, STARD4, CLU
HALLMARK_COAGULATION	0.00342845	0.00988201	0.431708	0.399631	1.617	63	GSN, DPP4, ACOX2, CTSH, F8, SPARC, CTSB, LTA4H, LGMN, MMP15, FBN1, GNG12, CTSK, CD9, PLAT, SIRT2, FN1, CSRP1, CTSO, CLU, LRP1, THBS1, ARF4, LAMP2
HALLMARK_COMPLEMENT	0.00707467	0.0182452	0.407018	0.359788	1.58735	97	DPP4, CD36, CTSH, CDA, KYNU, CTSC, F8, ZFPM2, CD59, CTSB, COL4A2, LTA4H, LIPA, LGMN, ME1, CPM, MMP15, CASP3, PLAT, PRCP, LYN, FN1, SRC, EHD1, CSRP1, CTSO, CLU, LRP1, APOBEC3F, LAMP2
HALLMARK_DNA_REPAIR	0.00014408	0.000705994	0.518848	-0.425259	-1.7925	111	PRIM1, COX17, DUT, POLA1, TYMS, RPA2, POLA2, RPA3, NUDT21, PCNA, LIG1, DDB2, CETN2, RFC4, RFC2, FEN1, POLR2D, TAF12, POLD1, NELFB, ERCC1, SSRP1, POLE4, AAAS, XPC, TAF6, NELFE, MPG, ZWINT, SF3A3, CSTF3, HPRT1, GTF3C5, ALYREF, POLR2G, SUPT5H, USP11, POM121, SAC3D1, GTF2B, CLP1, SUPT4H1, POLR2H, POLR2A, IMPDH2, GTF2H3, GTF2H5, GTF2F1, NT5C3A, NT5C, ERCC4, ERCC2, RAE1, DGCR8, BOLA2, NCBP2, CANT1, SEC…
HALLMARK_E2F_TARGETS	2.43645e-42	1.19386e-40	1.69659	-0.759306	-3.30785	153	H2AFX, KIF18B, AURKB, TIMELESS, PSMC3IP, MYC, ATAD2, HMGB2, KIF22, CDCA8, GINS4, CDCA3, TOP2A, MAD2L1, UBE2T, ASF1B, MKI67, PLK1, UBE2S, PRIM2, KIF4A, DNMT1, SPC24, BRCA1, TK1, HELLS, DUT, MCM6, CDC20, MMS22L, CIT, RACGAP1, RAD51AP1, CENPE, HMMR, CENPM, RPA2, GINS3, BUB1B, TMPO, MCM2, MCM3, POLA2, CDKN2C, TACC3, SMC6, DLGAP5, CBX5, RPA3, MCM7, CHEK1, GINS1, RNASEH2A, NUDT21, DIAPH3, UBR7, HMGB3, …
HALLMARK_EPITHELIAL_MESENCHYMAL_TRANSITION	1.30965e-07	1.28346e-06	0.690132	0.449284	2.11007	138	COL11A1, TGM2, TPM1, FUCA1, NNMT, MEST, IGFBP4, LUM, EDIL3, TPM2, BDNF, CAP2, PDLIM4, OXTR, COL5A1, TAGLN, SPARC, COL4A1, SGCD, COL5A2, LOX, LRRC15, CD59, LAMC1, WNT5A, LOXL2, COL4A2, PLOD2, MYLK, P3H1, FBN1, IGFBP3, MATN2, COL1A1, THY1, NID2, CALD1, RGS4, DAB2, THBS2, FSTL1, SFRP1, DCN, QSOX1, LAMA3, DST, PLOD1, PVR, FN1, DKK1, COL3A1, FLNA, BASP1, ANPEP, FAP, FBLN5, LRP1, THBS1, SNTB1, FGF2
HALLMARK_ESTROGEN_RESPONSE_EARLY	0.00217705	0.00761967	0.431708	0.382045	1.68571	93	TPD52L1, TGM2, CLIC3, ABAT, SLC1A1, IGFBP4, PODXL, CCND1, ENDOD1, DYNLT3, ZNF185, SCARB1, WFS1, DHRS3, SVIL, HSPB8, PMAIP1, AR, ABLIM1, MLPH, FHL2, GLA, ALDH3B1, PAPSS2, SLC9A3R1, TTC39A, NADSYN1, GFRA1, FAM102A, FARP1, SLC39A6
HALLMARK_ESTROGEN_RESPONSE_LATE	0.117801	0.180383	0.2114	0.291455	1.24056	78	TPD52L1, CLIC3, ACOX2, MEST, IGFBP4, TST, CCND1, DYNLT3, SCARB1, WFS1, HSPB8, CAV1, ATP2B4, CD9, PLXNB1, ALDH3A2, GLA, ALDH3B1, PAPSS2, SLC9A3R1, ETFB, FAM102A, FARP1, CPE, UNC13B
HALLMARK_FATTY_ACID_METABOLISM	0.0449007	0.0965797	0.321776	0.312736	1.39034	102	CD36, GSTZ1, ETFDH, CRAT, ACAA1, UROS, MAOA, EHHADH, G0S2, ME1, ACSL5, CPT2, HMGCL, RETSAT, ALDH3A2, ECH1, PCBD1, D2HGDH, HSD17B4, ALDH9A1, MLYCD, HADHB, DHCR24, MCEE, DECR1, GRHPR, EPHX1, SUCLG2, ACOT2, ACO2, NSDHL, IDH3G, CRYZ, RAP1GDS1, MIF, CBR1, MDH1, PTPRG, ENO3, CPOX, ACOX1, ELOVL5, IDI1, BCKDHB, DLD, PDHB, LGALS1, HSD17B11, MDH2, SUCLG1, HSD17B10, AUH
HALLMARK_G2M_CHECKPOINT	3.66162e-36	8.97098e-35	1.56318	-0.746547	-3.23646	142	H2AFX, AURKB, GINS2, MYC, TPX2, KIF22, PBK, TOP2A, CCNA2, MAD2L1, MKI67, CHAF1A, KIF11, PLK1, UBE2S, PRIM2, HSPA8, CENPF, KIF4A, NSD2, MCM6, CDC20, PRC1, RACGAP1, KIF15, CENPE, HMMR, NUSAP1, RPA2, TMPO, RBL1, MCM2, MCM3, POLA2, SMC2, CDKN2C, KIF20B, UBE2C, TACC3, TTK, SAP30, NDC80, CHEK1, HMGB3, SMC4, BIRC5, MCM5, ORC6, EZH2, CKS2, CBX1, ODF2, KNL1, SMC1A, RBM14, NASP, SLC7A5, STAG1, H2AFZ, CKS1B…
HALLMARK_GLYCOLYSIS	0.0513919	0.104925	0.321776	0.284644	1.31694	126	AK4, P4HA1, FAM162A, IDUA, COL5A1, PKM, SDC2, GALK1, PMM2, P4HA2, GLRX, PLOD2, ME1, AK3, MPI, IGFBP3, CYB5A, AGL, TPST1, CHPF2, TXN, DPYSL4, PYGL, DCN, QSOX1, PYGB, PLOD1, GFPT1, B3GALT6, KDELR3, GYS1, RBCK1, PHKA2, B3GAT3, ALDH9A1
HALLMARK_HEDGEHOG_SIGNALING	0.725	0.795591	0.0667426	0.269867	0.814181	18	RTN1, THY1, OPHN1, CRMP1, CDK6, NF1, DPYSL2
HALLMARK_HEME_METABOLISM	0.00274799	0.00897676	0.431708	0.343957	1.55089	112	CLIC2, SNCA, SIDT2, BPGM, HAGH, CCDC28A, TMEM9B, ENDOD1, RBM38, DAAM1, LPIN2, UROS, FBXO9, PPP2R5B, CTSB, P4HA2, HEBP1, CCND3, EPB41, ELL2, ALDH6A1, ATP6V0A1, OPTN, FN3K, TNS1, GDE1, MAP2K3, GYPC, MGST3, MKRN1, SELENBP1, SLC30A1, UBAC1, PSMD9, GCLC, FECH, CIR1, CAT, MARK3, YPEL5, LAMP2, ADD1
HALLMARK_HYPOXIA	3.38552e-05	0.000236986	0.557332	0.434767	1.93406	103	PPP1R3C, TGM2, AK4, P4HA1, LXN, PLIN2, NDST2, FAM162A, AMPD3, NAGK, COL5A1, SCARB1, SDC2, DTNA, LOX, GALK1, NEDD4L, CAV1, P4HA2, PGM1, PRDX5, NDST1, GLRX, HEXA, IGFBP3, CDKN1A, DPYSL4, DCN, VHL, TMEM45A, B3GALT6, S100A4, SELENBP1, KDELR3, GYS1, GAA, PRKCA
HALLMARK_IL2_STAT5_SIGNALING	0.567123	0.687527	0.0894367	0.215029	0.948212	96	TGM2, P4HA1, PLIN2, SYNGR2, DHRS3, CCND3, ANXA4, SNX14, CD81, PLPP1, CASP3, CTSZ, MAP6, SPRED2, PTRH2, PRAF2, FAH, ALCAM, ABCB1, AHR, PTGER2, SMPDL3A, AHCY, ENPP1, PLEC, DENND5A, TRAF1, TTC39B, GPX4, GALM, AMACR, ITGAV, IFITM3, CKAP4, MYO1E, TWSG1, ADAM19, ENO3, CAPG, PRNP
HALLMARK_IL6_JAK_STAT3_SIGNALING	0.902192	0.961031	0.0425878	-0.201191	-0.679255	35	TNFRSF12A, JUN, OSMR, IL4R, TNFRSF21, ITGA4, STAT1
HALLMARK_INFLAMMATORY_RESPONSE	0.0541237	0.106082	0.315325	0.349264	1.4132	63	PCDH7, SRI, ADRM1, EREG, RNF144B, CD82, IL18, HBEGF, PDE4B, CDKN1A, SLC31A1, LPAR1, LYN, ABI1, PVR, AHR, ABCA1, ATP2B1, PTGER2, IRAK2, KIF1B
HALLMARK_INTERFERON_ALPHA_RESPONSE	0.720297	0.795591	0.0713053	0.222367	0.857666	52	GMPR, TRAFD1, UBA7, IFIT2, ISG15, TXNIP, SAMD9L, LGALS3BP, TRIM25
HALLMARK_INTERFERON_GAMMA_RESPONSE	0.112045	0.177103	0.224966	0.277542	1.21297	91	SRI, BPGM, PTPN1, ST3GAL5, TRAFD1, PDE4B, MVP, IFIT2, ISG15, CDKN1A, TXNIP, VAMP5, CASP3, DDX58, SAMD9L, STAT3, LGALS3BP, TRIM25, RBCK1
HALLMARK_KRAS_SIGNALING_DN	0.0740741	0.134431	0.261664	0.413582	1.40077	30	SYNPO, FGGY, IDUA, ENTPD7, COPZ2, ABCB11, CAMK1D, EPHA5, PDK2, SPHK2
HALLMARK_KRAS_SIGNALING_UP	0.0933333	0.152444	0.24134	0.307055	1.28009	73	FUCA1, EREG, BPGM, ANO1, EVI5, ITGBL1, HBEGF, G0S2, GLRX, HDAC9, IGFBP3, TOR1AIP2, PLAT, CCSER2, ENG, GYPC, ANKH
HALLMARK_MITOTIC_SPINDLE	0.00132737	0.00500316	0.45506	-0.364588	-1.60113	157	TPX2, KIF22, TOP2A, KIF11, PLK1, CENPF, KIF4A, PRC1, ECT2, RACGAP1, KIF15, CENPE, NUSAP1, KIF20B, ANLN, TTK, DLGAP5, NDC80, SMC4, BIRC5, SMC1A, SMC3, KNTC1, INCENP, LMNB1
HALLMARK_MTORC1_SIGNALING	0.959821	1	0.0338984	-0.172906	-0.749592	142	PLK1, DHFR, MCM2, IFRD1, RPA1, SLC7A5, HMGCR, FADS1, SLC37A4, SLC1A4, TCEA1, SLC7A11, NFIL3, CACYBP, HPRT1, NFYC, TUBG1, NUP205, GMPS, PHGDH, SQSTM1, NUFIP1, MTHFD2, CCNG1, PNO1, FADS2
HALLMARK_MYC_TARGETS_V1	2.40257e-13	3.9242e-12	0.932595	-0.527714	-2.33022	170	MYC, CCNA2, MAD2L1, DUT, MCM6, CDC20, TYMS, CNBP, MCM2, MCM7, IFRD1, POLD2, MCM5, FBL, PCNA, RFC4, CBX3, RRM1, DEK, XRCC6, H2AFZ, RANBP1, SMARCC1, LSM7, EIF1AX, CDK2, SNRPD2, PABPC1, DDX21, RNPS1, EXOSC7, HDAC2, POLE3, SRSF3, HNRNPA2B1, DHX15, DDX18, SF3B3, SNRPA, BUB3, HNRNPD, HNRNPR, LSM2, RPL18, NHP2, HPRT1, NCBP1, SNRPB2, HNRNPC, NOP56, SYNCRIP, HNRNPA3, SRSF7, SRSF1, RSL1D1, ERH, EIF4A1, PAB…
HALLMARK_MYC_TARGETS_V2	1.43685e-06	1.17343e-05	0.643552	-0.611102	-2.19391	46	MYC, PLK1, MCM5, CBX3, UTP20, SLC19A1, DDX18, MPHOSPH10, NOP56, PES1, NOC4L, PRMT3, TFB2M, GRWD1, NIP7, EXOSC5, BYSL, NOP2, MYBBP1A, WDR43, NOP16, IMP4, NPM1, RRP12, RCL1, LAS1L, TCOF1, NDUFAF4, HSPD1
HALLMARK_MYOGENESIS	8.85996e-11	1.08535e-09	0.839089	0.564147	2.48663	100	PPP1R3C, GSN, TPD52L1, CD36, ITGA7, TPM3, CRYAB, IGFBP7, TPM2, SYNGR2, SPTAN1, COX7A1, CRAT, SCHIP1, FABP3, TAGLN, FHL1, SPARC, SGCD, DMD, DTNA, SVIL, HSPB8, HBEGF, MRAS, COL4A2, PSEN2, MAPRE3, AK1, MYLK, DAPK2, ABLIM1, IGFBP3, COL1A1, CSRP3, CDKN1A, BIN1, AGL, SIRT2, CAMK2B, LPIN1, SPEG
HALLMARK_NOTCH_SIGNALING	0.442222	0.570234	0.0916795	0.326973	1.00842	19	CCND1, WNT5A, ARRB1, PSEN2, JAG1
HALLMARK_OXIDATIVE_PHOSPHORYLATION	0.0876133	0.152444	0.266351	0.253627	1.21031	151	ETFDH, ACAA1, COX10, SLC25A20, ATP6V1H, BDH2, NDUFB7, NDUFA3, ALDH6A1, CYB5A, ETFA, RETSAT, HADHA, ECH1, NDUFC1, NDUFA8, MGST3, ETFB, TCIRG1, ACAT1, SLC25A6, NDUFV2, HADHB, COX7C, ATP6V1E1, VDAC2, DECR1, ATP6V1G1, NDUFA4, FXN, ACO2, VDAC1, IDH3G, AIFM1, UQCRQ, SDHB, NDUFAB1, GPX4, NQO2, NDUFV1, ISCA1, MDH1, NDUFS3, PRDX3, NDUFC2, NDUFS7, NDUFA5, NDUFB5, MTRR, DLD, NDUFS1, PDHB, NDUFB4, COX6B1, ND…
HALLMARK_P53_PATHWAY	0.018016	0.0441393	0.352488	0.318323	1.43531	112	TPD52L1, FUCA1, ABAT, EPS8L2, CDKN2A, ADA, GM2A, FAM162A, CD82, DGKA, TSC22D1, TRAFD1, RCHY1, HBEGF, CTSF, CCND3, AK1, PMM1, CD81, ZFP36L1, CDKN1A, ZMAT3, RHBDF2, TXNIP, RETSAT
HALLMARK_PEROXISOME	0.0453333	0.0965797	0.352171	0.334009	1.37593	70	CLN8, ABCB4, CRAT, ABCD1, ACAA1, STS, DHRS3, MVP, EHHADH, PRDX5, ACSL5, BCL10, PEX14, HMGCL, RETSAT, ECH1, GSTK1, ABCC5, HSD17B4, ALDH9A1, MLYCD, SCP2, DHCR24, FIS1, ABCB1, CAT, PEX13
HALLMARK_PI3K_AKT_MTOR_SIGNALING	1	1	0.0589694	0.143895	0.592767	70	PLA2G12A, AKT1S1, CDKN1A, MAP2K3, MKNK1, IRAK4, THEM4, PRKAR2A, PRKAA2, NCK1, PRKAG1, MAPK9, ITPR2, RPTOR, HSP90B1, DUSP3, YWHAB, RIPK1, MAP2K6, RAF1, MAPK10, MAPK1, HRAS, TSC2, GSK3B, CSNK2B, MYD88
HALLMARK_PROTEIN_SECRETION	0.000463746	0.00189363	0.498493	0.427741	1.82508	79	CAV2, CTSC, STX7, ATP6V1H, PPT1, USO1, GLA, YIPF6, CD63, DNM1L, SEC22B, VAMP4, STX12, DST, AP2S1, CLN5, VAMP3, RAB22A, CLTA, ABCA1, LAMP2, RAB5A, SNAP23, KIF1B, GOSR2, SCRN1, COPB2, RAB2A, YKT6, CLCN3, ATP7A, GBF1, ERGIC3, TMED2, SOD1, COPE, AP3S1, ARFIP1, IGF2R, SEC31A, COG2, OCRL, ARFGEF2, SEC24D, BNIP3
HALLMARK_REACTIVE_OXYGEN_SPECIES_PATHWAY	0.198044	0.26956	0.154191	0.341116	1.20776	35	LAMTOR5, MGST1, GLRX, TXN, FTL, HMOX2, GCLC, CAT, PRDX4, PRDX1, GPX4, STK25, ABCC1, SOD1, PRNP, MSRA, NDUFB4, NDUFA6, SELENOS
HALLMARK_SPERMATOGENESIS	0.0280528	0.0654565	0.352171	-0.460051	-1.59663	39	PARP2, CHFR, TTK, TOPBP1, EZH2, RFC4, SIRT1, COIL, PIAS2, CAMK4, JAM3, RAD17, IFT88, STRBP
HALLMARK_TGF_BETA_SIGNALING	0.994941	1	0.0380842	-0.149418	-0.498224	34	SLC20A1, HDAC1, ARID4B, SMAD7, TGFBR1, BMPR1A, HIPK2, SKI, TRIM33, CDK9, XIAP, SERPINE1
HALLMARK_TNFA_SIGNALING_VIA_NFKB	0.659236	0.769108	0.0543434	-0.22437	-0.901745	84	MYC, FOSL1, MAFF, B4GALT5, CCNL1, GEM, KLF4, ZBTB10, PLAU, JUN, FJX1, NFIL3, TNC, MCL1
HALLMARK_UNFOLDED_PROTEIN_RESPONSE	0.00533517	0.0145235	0.407018	-0.401878	-1.62626	86	H2AFX, FUS, CNOT6, NFYA, RPS14, NFYB, CHAC1, SLC7A5, EXOSC2, BANF1, CKS1B, DDX10, SLC1A4, EXOSC1, LSM4, EXOSC4, EXOSC9, NHP2, NOP56, EXOSC10, DKC1, CEBPB, IMP3, KHSRP, EXOSC5, DCP1A, EIF4A1, CXXC1, MTHFD2, NPM1, LSM1, ASNS
HALLMARK_UV_RESPONSE_DN	0.000327314	0.00145803	0.498493	0.396993	1.7649	104	SRI, COL11A1, SLC22A18, KCNMA1, BDNF, WDR37, CAP2, SCHIP1, KALRN, SDC2, COL5A2, LAMC1, CAV1, IGFBP5, LTBP1, ANXA4, PLCB4, PIK3CD, ATP2B4, PEX14, COL1A1, ADGRL2, APBB2, FHL2, IRS1, RGS4, DAB2, TGFBR2, LPAR1, CELF2, SIPA1L1, PRKCA, COL3A1, ADD3, ATRN, PTPRM, FBLN5, ANXA2, ATP2B1, AMPH
HALLMARK_UV_RESPONSE_UP	0.575277	0.687527	0.0605093	-0.230444	-0.933775	88	H2AFX, PARP2, RFC4, FEN1, CDK2, DDX21, POLE3, IGFBP2, APOM, CDC5L, PTPRD, MMP14, AGO2, GLS, SQSTM1, HNRNPU, PDLIM3, WIZ, CHKA, DNAJB1, NXF1, ASNS, RAB27A, RXRB
HALLMARK_WNT_BETA_CATENIN_SIGNALING	0.0654867	0.123417	0.234393	-0.494684	-1.47554	22	MYC, KAT2A, SKP2, HDAC2, PPARD, HDAC5, DVL2, RBPJ
HALLMARK_XENOBIOTIC_METABOLISM	8.59943e-05	0.000468191	0.538434	0.407444	1.80984	106	CD36, ACOX2, CDA, ACP1, ITIH4, HGFAC, IGFBP4, DHRS1, KYNU, ETFDH, MPP2, LPIN2, MAOA, PMM1, CYB5A, TPST1, RETSAT, ECH1, GART, PAPSS2, FAH, CDO1, COMT, NMT1, ASL, SLC12A4, BCAT1, ALDH9A1, ALDH2, HSD17B2, GCLC, CAT, GSTT2, EPHX1, ACP2, NFS1, TGFB2, DHRS7, PYCR1, AHCY, ACO2

## Sheet: PDL29
pathway	pval	padj	log2err	ES	NES	size	leadingEdge
HALLMARK_ADIPOGENESIS	1.15112e-09	1.1281e-08	0.788187	0.479602	2.24358	127	CD36, ITGA7, HSPB8, LPCAT3, TST, COL4A1, TANK, DHRS7B, REEP5, CRAT, CMPK1, ABCA1, MIGA2, LAMA4, MYLK, ETFB, DHRS7, MCCC1, RETSAT, GPAT4, CPT2, PGM1, AIFM1, MGST3, DDT, PLIN2, NDUFAB1, CMBL, FAH, ADCY6, NKIRAS1, DBT, BCL2L13, ANGPT1, ME1, ACLY, DNAJB9, COX6A1, ECHS1, GPX4, ECH1, DGAT1, ALDH2, STOM, SCP2, PQLC3, ITSN1, CD151, DECR1, PRDX3, PEX14, DLD, MDH2, ATP1B3, SCARB1
HALLMARK_ALLOGRAFT_REJECTION	0.130769	0.203779	0.245042	0.297545	1.24032	60	EREG, CDKN2A, IL18, THY1, TGFB2, HDAC9, CD4, FLNA, CCND3, F2, ICAM1, LYN, IKBKB, EIF5A, ABI1
HALLMARK_ANDROGEN_RESPONSE	0.687583	0.748702	0.0443293	-0.24612	-0.869691	58	STK39, H1F0, HMGCR, FKBP5, ZBTB10, ARID5B, SRF, FADS1, XRCC5, ALDH1A3
HALLMARK_ANGIOGENESIS	0.112272	0.183377	0.216543	0.457963	1.36941	17	LUM, FSTL1, COL5A2, LRPAP1, JAG1, S100A4, COL3A1
HALLMARK_APICAL_JUNCTION	0.0274656	0.0538325	0.352488	0.2825	1.277	112	LDLRAP1, EVL, MPZL1, THY1, CRAT, RRAS, NEXN, LAMB3, ZYX, MAPK11, LIMA1, CNN2, CERCAM, ITGA3, RAC2, INPPL1, ICAM1, IRS1, SIRPA, RSU1, TSC1, SPEG, LAYN, ACTN4, ICAM5, ACTN3, MVD, CD276, LAMA3, MYH9, ARPC2, FBN1, VWF, MPP5, GNAI2, ACTN1, PTK2, GNAI1, PARD6G, VASP, DLG1, HRAS, IKBKG, ARHGEF6, B4GALT1, BAIAP2, HADH, EXOC4, PFN1, PIK3CB, MAP4K2, TSPAN4, ADAM9, STX4, AKT2, PARVA, SHC1, TRO, ITGB1, CTNND…
HALLMARK_APICAL_SURFACE	0.023446	0.0494453	0.352488	0.546546	1.6343	17	ATP6V0A4, SLC34A3, GSTM3, THY1, ATP8B1, FLOT2
HALLMARK_APOPTOSIS	0.0242181	0.0494453	0.352488	0.309707	1.38252	99	PEA15, TXNIP, GSN, EREG, IL18, PSEN2, SOD2, LUM, TGFB2, ANXA1, RETSAT, CDKN1A, PAK1, FEZ1, SPTAN1, PPT1, GPX1, DNM1L, F2, BID, CAV1, CCND1, TSPO, DCN, GSTM1, BCAP31, GPX4, PPP2R5B, NEDD9, PMAIP1, ANKH, RNASEL, CYLD, IGF2R, PSEN1, TIMP2, HMOX1
HALLMARK_BILE_ACID_METABOLISM	0.198444	0.277821	0.197822	0.290121	1.16647	54	SLC22A18, ABCA2, ABCD1, PRDX5, ABCA1, OPTN, ACSL5, RETSAT, MLYCD, ALDH9A1, GSTK1, PECR, HSD17B4, PEX19, SCP2
HALLMARK_CHOLESTEROL_HOMEOSTASIS	0.13308	0.203779	0.24134	0.31229	1.24524	51	FBXO6, ANXA5, ABCA2, TM7SF2, LGMN, FDPS, ETHE1, GSTM2, STARD4, PCYT2, CD9, MVK, JAG1, ECH1, ALCAM, MVD
HALLMARK_COAGULATION	0.000248251	0.000810952	0.498493	0.450267	1.87618	63	DPP4, ACOX2, GSN, CTSH, CTSK, CTSB, PROS1, S100A13, SPARC, CSRP1, F8, LGMN, ANXA1, CTSO, A2M, LTA4H, CD9, MMP15, F2, LAMP2, HTRA1
HALLMARK_COMPLEMENT	1.89541e-05	7.73961e-05	0.57561	0.417614	1.87832	97	CD36, DPP4, CDA, CTSH, CTSB, KYNU, ANXA5, S100A13, CSRP1, F8, LGMN, COL4A2, CTSO, LIPA, HSPA5, CD59, LTA4H, MMP15, F2, XPNPEP1, LAMP2, ME1, LYN, APOA4, PRCP, FN1, APOBEC3F, ATOX1, EHD1, VCPIP1, SERPINC1, CD46, GMFB, PSEN1, USP14, TIMP2
HALLMARK_DNA_REPAIR	0.000308955	0.000946174	0.498493	-0.441833	-1.73641	111	PRIM1, DUT, TYMS, POLA1, LIG1, RFC2, POLA2, RFC4, PCNA, FEN1, SSRP1, RPA2, RPA3, POLD1, ZWINT, DDB2, MPG, NELFB, POLE4, XPC, ALYREF, TAF6, AAAS, GTF3C5, NCBP2, POLR2D, CLP1, POLR2G, POLR2A, POM121, SUPT5H, USP11, TAF9, DGCR8, HPRT1, ERCC4, ERCC1, POLR2K, NELFE, TAF12, GTF2B, POLR3C, POLR2H, SUPT4H1, IMPDH2, TP53, SNAPC4, CSTF3, RAE1, SF3A3, GTF2H1, POLR1D, UPF3B, NT5C3A, SMAD5, SAC3D1, POLL, COX1…
HALLMARK_E2F_TARGETS	2.38879e-46	1.17051e-44	1.77415	-0.783776	-3.19574	153	AURKB, CDCA8, BRCA1, ASF1B, ATAD2, KIF22, HELLS, TOP2A, CDC20, CDCA3, GINS4, MKI67, PLK1, KIF4A, TK1, GINS3, SRSF2, ORC6, TIMELESS, PSMC3IP, DUT, CENPM, H2AFZ, RACGAP1, PRIM2, SPC24, UBE2T, MCM6, MCM3, HMGB2, KIF18B, MMS22L, EZH2, HMMR, RAD51AP1, SPC25, BUB1B, MCM2, MCM7, MCM5, BIRC5, SMC4, DNMT1, CIT, TMPO, DLGAP5, CENPE, MAD2L1, LIG1, RNASEH2A, RFC2, UBE2S, POLA2, CHEK1, CBX5, CKS1B, CDKN2C, HM…
HALLMARK_EPITHELIAL_MESENCHYMAL_TRANSITION	4.04269e-07	2.20102e-06	0.674963	0.423987	1.99358	138	NNMT, FUCA1, COL11A1, SERPINE2, TGM2, TPM2, MEST, TPM1, IGFBP4, CALD1, TAGLN, COL4A1, TPM4, OXTR, THY1, CAP2, EDIL3, SPARC, PDLIM4, LUM, BDNF, PVR, DAB2, SGCD, COL4A2, RGS4, MYLK, FSTL1, LOX, CD59, FLNA, COL5A2, CALU, LRRC15, MXRA5, NID2, COL5A1, HTRA1, THBS2, DCN, LAMC1, FAP, LOXL2, DST, PLOD1, FN1, BASP1, P3H1, PPIB, ITGB5, COL3A1, COLGALT1, SNTB1, ANPEP, LAMA2, CADM1, LAMA1, SERPINH1
HALLMARK_ESTROGEN_RESPONSE_EARLY	0.00407875	0.0105189	0.407018	0.345422	1.52548	93	SLC1A1, TPD52L1, TGM2, HSPB8, CLIC3, ABAT, IGFBP4, ENDOD1, FHL2, WFS1, ALDH3B1, DYNLT3, PODXL, ABLIM1, ZNF185, STC2, SVIL, SYNGR1, FAM102A, MLPH, SLC9A3R1, CCND1, GLA, NADSYN1, UGCG
HALLMARK_ESTROGEN_RESPONSE_LATE	0.491824	0.547713	0.057006	-0.263029	-0.987179	78	GINS2, TOP2A, CDC20, KIF20A, RNASEH2A, ABCA3, NAB2, FKBP5, TFPI2, MDK, FOXC1
HALLMARK_FATTY_ACID_METABOLISM	0.0013329	0.0038419	0.45506	0.351252	1.58464	102	CD36, ACAA1, CRAT, EPHX1, ETFDH, ACSL5, MAOA, RETSAT, CPT2, HADHB, MCEE, UROS, EHHADH, PCBD1, MLYCD, ALDH9A1, HMGCL, ME1, SERINC1, GRHPR, HSD17B4, ECHS1, CBR1, G0S2, GSTZ1, ECH1, D2HGDH, CPOX, PSME1, DECR1, MDH1, NSDHL, DLD, ECI1, MDH2, LDHA, MIF, HSD17B10, PTPRG, ALDH3A2, IDH1, CRYZ, SUCLG1, PDHA1, HSD17B11, HSDL2, PDHB, DLST, SUCLG2, ACADS
HALLMARK_G2M_CHECKPOINT	3.36753e-38	8.25044e-37	1.60888	-0.76308	-3.07635	142	AURKB, GINS2, TPX2, KIF22, CCNA2, UBE2C, TOP2A, KIF11, CDC20, MKI67, PLK1, KIF4A, PBK, PRC1, SRSF2, ORC6, CENPF, NSD2, TTK, CHAF1A, NDC80, H2AFZ, RACGAP1, PRIM2, MCM6, MCM3, EZH2, HMMR, NUSAP1, MCM2, RBL1, MCM5, BIRC5, SMC4, KIF15, TMPO, TLE3, CENPE, MAD2L1, SMC2, ODC1, KNL1, UBE2S, INCENP, POLA2, CHEK1, CKS1B, CDKN2C, HMGB3, NASP, CDC25B, SMARCC1, CKS2, ODF2, SMC1A, LMNB1, STAG1, CTCF, KIF20B, R…
HALLMARK_GLYCOLYSIS	0.0169222	0.0394851	0.352488	0.293716	1.37279	126	AK4, P4HA1, GLRX, IDUA, GALK1, PKM, AK3, TXN, SDC2, AKR1A1, PYGB, STC2, PYGL, HSPA5, MPI, FAM162A, AGL, ARPP19, ALDH9A1, DPYSL4, P4HA2, PMM2, PGK1, COL5A1, ME1, DCN, KDELR3, SLC35A3, CYB5A, PLOD1, SLC16A3, GYS1, PGAM1, RBCK1, GFPT1, EXT2, PHKA2, LHPP, MDH1, NSDHL, DLD, MDH2, LDHA, HOMER1, MIF, IDH1, COPB2, IRS2, PLOD2, GCLC, PAM, B3GAT3
HALLMARK_HEDGEHOG_SIGNALING	0.793215	0.80974	0.0465084	-0.279568	-0.766345	18	TLE3, NRP1, NRP2, LDB1, PLG, TLE1
HALLMARK_HEME_METABOLISM	0.000138321	0.000484124	0.518848	0.371195	1.67793	112	CLIC2, SNCA, CCDC28A, ATP6V0A1, CTSB, ENDOD1, BPGM, GYPC, DAAM1, SIDT2, HAGH, ALDH6A1, CLCN3, ADIPOR1, FN3K, OPTN, BSG, TMEM9B, HEBP1, UROS, MGST3, EPB41, CCND3, FBXO9, LRP10, SDCBP, MAP2K3, P4HA2, LAMP2, SLC30A1, LPIN2, CAST, SELENBP1, PPP2R5B
HALLMARK_HYPOXIA	2.50724e-05	9.45038e-05	0.57561	0.419185	1.88728	103	PPP1R3C, AK4, TGM2, P4HA1, GLRX, DTNA, AMPD3, GALK1, NDST2, SDC2, PRDX5, HEXA, NEDD4L, CDKN1A, GAA, PGM1, LOX, STC2, HSPA5, FAM162A, PLIN2, LXN, DPYSL4, P4HA2, XPNPEP1, PGK1, COL5A1, CAV1, DCN, KDELR3, GRHPR, SELENBP1, TES, ATP7A, GYS1, S100A4, TPST2, NDST1, HMOX1, SLC2A3, NAGK, MYH9, PRKCA, LDHA, SCARB1, TMEM45A, GPI, NDRG1, MIF
HALLMARK_IL2_STAT5_SIGNALING	0.306931	0.367816	0.17822	0.23952	1.07139	96	TGM2, P4HA1, SYNGR2, SH3BGRL2, PRAF2, ANXA4, PLPP1, PLEC, CCND3, PLIN2, FAH, CKAP4, CTSZ, PTRH2, GPX4, CD81, ALCAM, PRNP, MAP6, SERPINC1, AHCY, AHR, AMACR, IGF2R, P2RX4, DHRS3, SWAP70, SLC2A3, NDRG1, SERPINB6, GALM, SNX14, AHNAK, SCN9A, CAPG, SMPDL3A, ADAM19, NT5E, IFITM3, MYO1C, CASP3, CD44
HALLMARK_IL6_JAK_STAT3_SIGNALING	0.0872274	0.147384	0.271289	0.377197	1.38086	35	CD36, PTPN1, A2M, STAT3, CD9, BAK1
HALLMARK_INFLAMMATORY_RESPONSE	0.0625	0.113426	0.376039	0.344322	1.43472	63	EREG, ADRM1, RNF144B, IL18, KCNJ2, ABCA1, PVR, CDKN1A, CD82, ICAM1, SLC31A1, LYN, HBEGF, ABI1, AHR, SLC11A2, ATP2B1, P2RX4, PSEN1, LPAR1, DCBLD2
HALLMARK_INTERFERON_ALPHA_RESPONSE	0.227799	0.31006	0.183024	0.281848	1.12389	52	TXNIP, IFIT2, GMPR, LGALS3BP, NCOA7, TRAFD1, ISG15, UBA7, SAMD9L, IFIT3, PSME1, IFI35, PSME2, TRIM25, TAP1
HALLMARK_INTERFERON_GAMMA_RESPONSE	0.298969	0.367816	0.184706	0.243217	1.07617	91	TXNIP, BPGM, MVP, IFIT2, SOD2, VAMP5, ST3GAL5, CDKN1A, PTPN1, STAT3, LGALS3BP, ICAM1, TRAFD1, METTL7B, ISG15, VAMP8, DDX58, SAMD9L, RBCK1, IFIT3, PSME1, IFIT1, HLA-B, IFI35, LYSMD2, PSME2, TRIM25, TAP1, SPPL2A, UPP1, IFITM3, CASP3, PDE4B, PSMB2, TAPBP, PSMA2, OGFR
HALLMARK_KRAS_SIGNALING_DN	0.16369	0.235907	0.190023	0.366873	1.28083	30	SYNPO, COPZ2, IDUA, ABCB11, FGGY, TGFB2, PDK2
HALLMARK_KRAS_SIGNALING_UP	0.488263	0.547713	0.134273	0.227918	0.972369	73	FUCA1, EREG, GLRX, BPGM, GYPC, SNAP25, GPNMB, HDAC9, EVI5, USP12
HALLMARK_MITOTIC_SPINDLE	2.01346e-06	9.86594e-06	0.627257	-0.456198	-1.86771	157	TPX2, KIF22, TOP2A, KIF11, PLK1, KIF4A, PRC1, CENPF, TTK, NDC80, RACGAP1, NUSAP1, BIRC5, SMC4, KIF15, ECT2, DLGAP5, CENPE, ANLN, INCENP, KNTC1, SMC1A, SMC3, RFC1, LMNB1, KIF20B
HALLMARK_MTORC1_SIGNALING	0.838554	0.838554	0.0302042	-0.206249	-0.831491	142	PLK1, DHFR, MCM2, HMGCR, RPA1, NFYC, IFRD1, NUFIP1, FADS1, NFIL3, PNO1, GMPS, TMEM97, NUP205, TUBG1, CCNG1, FADS2, CANX, TCEA1, PHGDH, HPRT1, SLC1A4, UCHL5, MTHFD2, ASNS, RRP9, SLC37A4
HALLMARK_MYC_TARGETS_V1	3.77691e-12	6.16895e-11	0.887075	-0.537869	-2.2118	170	CCNA2, CDC20, SRSF2, DUT, H2AFZ, MCM6, TYMS, MCM2, MCM7, MCM5, MAD2L1, ODC1, EXOSC7, POLD2, RFC4, SMARCC1, PCNA, CNBP, DEK, CBX3, POLE3, CDK2, RRM1, IFRD1, DDX21, DDX18, HNRNPC, SF3B3, HDAC2, NCBP1, TRA2B, BUB3, DHX15, SNRPD2, NCBP2, SNRPB2, RANBP1, RNPS1, FBL, PRPF31, HNRNPA2B1, LSM7, SET, HNRNPU, PABPC1, MYC, SRSF7, UBA2, CANX, NOP56, HPRT1, HNRNPR, UBE2E1, TRIM28, SNRPD1, LSM2, TXNL4A, SNRPA, …
HALLMARK_MYC_TARGETS_V2	2.59105e-07	1.58702e-06	0.674963	-0.651219	-2.19718	46	PLK1, MCM5, CBX3, DDX18, SLC19A1, EXOSC5, NIP7, IMP4, UTP20, MPHOSPH10, TFB2M, NOC4L, WDR43, TMEM97, MYC, GRWD1, RCL1, NOP56, BYSL, PRMT3, RRP9, NOP2, PES1, WDR74, RRP12, LAS1L, TCOF1, MYBBP1A
HALLMARK_MYOGENESIS	1.20972e-11	1.48191e-10	0.875325	0.559864	2.50338	100	CD36, CRYAB, PPP1R3C, IGFBP7, TPD52L1, DAPK2, ITGA7, TPM2, GSN, TPM3, HSPB8, TAGLN, DTNA, SYNGR2, FABP3, PSEN2, SCHIP1, SPARC, CRAT, MRAS, ABLIM1, MAPRE3, SGCD, COL4A2, MYLK, COX7A1, FDPS, CDKN1A, GAA, STC2, AK1, SVIL, BIN1, CAMK2B, AGL, SPTAN1, FHL1, CNN3, FST, SPEG, DMD, ACTN3, PRNP, HBEGF, LPIN1, GABARAPL2, CTF1, ITGB5, COL3A1
HALLMARK_NOTCH_SIGNALING	0.281768	0.367816	0.135741	0.378546	1.15048	19	WNT2, PSEN2, ARRB1, CCND1, JAG1
HALLMARK_OXIDATIVE_PHOSPHORYLATION	8.56635e-09	6.99586e-08	0.74774	0.43905	2.10058	151	ATP6V1H, ALDH6A1, ACAA1, COX6C, ETFDH, SLC25A20, ETFB, RETSAT, ETFA, ATP6V1G1, HADHB, TCIRG1, AIFM1, HADHA, ATP6V0C, MGST3, ATP6V1F, NDUFAB1, ATP6V1E1, COX5B, ATP6V1C1, CYB5R3, COX6A1, ECHS1, GPX4, ACAT1, CYB5A, ECH1, ACADSB, BDH2, NDUFB5, NQO2, VDAC1, NDUFA3, DECR1, PRDX3, MDH1, NDUFB8, NDUFS4, COX7A2, DLD, COX6B1, NNT, ECI1, MDH2, LDHA, GPI, ATP6AP1, NDUFA4, OGDH, HSD17B10, NDUFC2, ISCA1, IDH1,…
HALLMARK_P53_PATHWAY	0.143646	0.213293	0.282013	0.26304	1.18903	112	FUCA1, TPD52L1, TXNIP, ADA, GM2A, ABAT, EPS8L2, CDKN2A, CTSF, TSC22D1, ABCC5, EPHX1, RHBDF2, RETSAT, CDKN1A, DGKA, AK1, FAM162A, CCND3, CD82, ZFP36L1, BAK1, PMM1, TRAFD1, CD81, VAMP8, STOM, HBEGF, S100A4, ABHD4
HALLMARK_PEROXISOME	0.0762332	0.133408	0.352171	0.326116	1.38642	70	MVP, ABCD1, SOD2, ACAA1, ABCC5, CRAT, PRDX5, ACSL5, CLN8, FDPS, RETSAT, ABCB4, STS, EHHADH, MLYCD, ALDH9A1, HMGCL, GSTK1, PEX11B, TSPO, HSD17B4, ECH1, SCP2, PRDX1
HALLMARK_PI3K_AKT_MTOR_SIGNALING	0.313901	0.367816	0.166934	0.248052	1.05455	70	PLA2G12A, CFL1, CDKN1A, AKT1S1, THEM4, ARPC3, MAP2K3, PRKAA2, ACTR2, MAPK9, PIN1, MKNK1, PRKAR2A, SFN, CLTC, YWHAB, DUSP3, ACTR3, TSC2, IRAK4, HRAS, PFN1, GSK3B, PTPN11, MYD88, NCK1, RAF1, UBE2N, PRKAG1, AKT1, HSP90B1, RPTOR
HALLMARK_PROTEIN_SECRETION	2.56161e-07	1.58702e-06	0.674963	0.514101	2.20939	79	SEC22B, ATP6V1H, ABCA1, CLCN3, STX7, STX12, SCRN1, PPT1, DNM1L, LAMP2, CAV2, GLA, CLTA, ARFIP1, CD63, AP3B1, DST, STX16, USO1, SNAP23, VAMP3, VAMP4, RAB9A, ATP7A, AP2S1, CLN5, RAB5A, IGF2R, BNIP3, NAPA, RAB2A, CLTC, YKT6, COPB2, SCAMP3, PAM, COPB1, RAB22A, SEC31A, SOD1, RER1, GBF1, STAM, GOSR2, OCRL, TSG101, YIPF6, TMED2, ARFGAP3
HALLMARK_REACTIVE_OXYGEN_SPECIES_PATHWAY	0.0223989	0.0494453	0.352488	0.43142	1.57937	35	GLRX, LAMTOR5, FTL, TXN, SOD2, PRDX4, STK25, MGST1, TXNRD1, GPX4, PRNP, ATOX1, PRDX1, HMOX2
HALLMARK_SPERMATOGENESIS	0.00214785	0.00584692	0.431708	-0.529361	-1.72421	39	TTK, PARP2, EZH2, PIAS2, RFC4, TOPBP1, SIRT1, RAD17, STRBP, COIL, ZC3H14, TLE4, CAMK4
HALLMARK_TGF_BETA_SIGNALING	0.725806	0.766545	0.0461379	-0.25729	-0.819345	34	HDAC1, TRIM33, ARID4B, SKI, LTBP2, TGFBR1, CDK9, NCOR2, SMAD1, TGFB1, BMPR1A, HIPK2, SMAD3, BCAR3, XIAP, UBE2D3
HALLMARK_TNFA_SIGNALING_VIA_NFKB	0.735257	0.766545	0.0383996	-0.22872	-0.871077	84	FOSL1, MAFF, JUN, B4GALT5, TNC, GEM, ZBTB10, CCNL1, MCL1, PLAU, NFIL3, PHLDA1, CEBPD, MYC, PTX3, PANX1, CEBPB, FJX1, IL7R
HALLMARK_UNFOLDED_PROTEIN_RESPONSE	0.0441362	0.0831797	0.24134	-0.357043	-1.36183	86	CKS1B, FUS, EXOSC2, NFYB, NFYA, EXOSC5, CNOT6, EXOSC10, LSM4, CXXC1, DDX10, IMP3, EXOSC4, EXOSC9, H2AFX, ERN1, NOP56, CHAC1, EXOSC1, SLC1A4, CEBPB, MTHFD2, ASNS, RRP9, PARN, NHP2, ZBTB17, EIF4A1, KHSRP, SDAD1
HALLMARK_UV_RESPONSE_DN	0.0127425	0.0312192	0.38073	0.312729	1.40715	104	COL11A1, SLC22A18, WDR37, ATP2B4, TOGARAM1, FHL2, KCNMA1, CAP2, SCHIP1, ANXA4, SDC2, BDNF, DAB2, TGFBR2, RGS4, KALRN, ADGRL2, COL5A2, IRS1, CAV1, LAMC1, PLCB4, ATRN, MAP1B, PTPRM, IGFBP5, AMPH, CELF2, COL3A1, APBB2, ATP2B1, PLPP3, PEX14, LPAR1, PIK3CD, PRKCA, ERBB2, ADD3
HALLMARK_UV_RESPONSE_UP	0.315271	0.367816	0.175204	0.24326	1.06939	88	CYB5R1, TST, SPR, SOD2, TUBA4A, ACAA1, EPHX1, SIGMAR1, MAOA, BSG, CCND3, CLTB, ATP6V1F, PPT1, STK25, ATP6V1C1, ICAM1, BID, BAK1, NAT1, LYN, DGAT1, PPP1R2
HALLMARK_WNT_BETA_CATENIN_SIGNALING	0.306991	0.367816	0.0908241	-0.388501	-1.12133	22	SKP2, PPARD, RBPJ, HDAC2, KAT2A, MYC
HALLMARK_XENOBIOTIC_METABOLISM	4.69771e-06	2.09261e-05	0.610527	0.426027	1.91589	106	CD36, ACOX2, CDA, ACP1, IGFBP4, KYNU, PROS1, DHRS1, EPHX1, ETFDH, GSTT2, TGFB2, GART, DHRS7, MAOA, RETSAT, MPP2, ASL, COMT, DDT, ACP2, FAH, ARPP19, ALDH9A1, LPIN2, PMM1, SLC12A4, PTGR1, CBR1, CYB5A, ECH1, NFS1, ALDH2, ADH5

## Sheet: PDL33
pathway	pval	padj	log2err	ES	NES	size	leadingEdge
HALLMARK_ADIPOGENESIS	7.08192e-10	8.67535e-09	0.801216	0.510855	2.38692	127	CD36, LPCAT3, ITGA7, TST, LAMA4, COL4A1, HSPB8, ABCA1, MYLK, FABP4, CRAT, MIGA2, DHRS7B, CMPK1, MGST3, NDUFAB1, RETSAT, ETFB, MCCC1, DHRS7, FAH, CPT2, CMBL, PLIN2, ME1, DNAJB9, REEP5, PGM1, ANGPT1, NKIRAS1, BCL2L13, STOM, ADCY6, ECH1, GPX4, ACADS, AIFM1, ALDH2, DLD, CD151, DGAT1, ACLY, GPAT4, DDT, ECHS1, TANK, SCARB1, ITSN1, ENPP2, PEX14, DBT, SOWAHC, SCP2, MDH2, PRDX3, DECR1, PREB, CAT, SOD1, PF…
HALLMARK_ALLOGRAFT_REJECTION	0.0684524	0.098652	0.300682	0.341794	1.37538	60	IL18, EREG, CDKN2A, TGFB2, CCND3, PSMB10, FLNA, THY1, GBP2, LYN, ICAM1, IKBKB, HDAC9, CTSS
HALLMARK_ANDROGEN_RESPONSE	0.778443	0.811568	0.043888	-0.226232	-0.827111	58	H1F0, ZBTB10, HMGCR, FKBP5, ARID5B, UBE2I, SRF, XRCC5, STK39, XRCC6, FADS1
HALLMARK_ANGIOGENESIS	0.0414634	0.0615669	0.352171	0.525742	1.54731	17	LUM, FSTL1, JAG1, COL5A2, COL3A1, LRPAP1
HALLMARK_APICAL_JUNCTION	0.012071	0.0227492	0.38073	0.314145	1.41791	112	MAPK11, CRAT, LDLRAP1, RAC2, CERCAM, ADAM23, NEXN, CNN2, THY1, RRAS, ICAM1, ICAM5, RSU1, LAMB3, VWF, VASP, INPPL1, LAMA3, ITGA3, TSC1, FBN1, IRS1, EVL, MPZL1, LIMA1, MVD, ARPC2, BAIAP2, ZYX, PARD6G, ACTN4, ACTN1, GNAI1, SPEG, GNAI2, MPP5, SRC, PTK2, ACTN3
HALLMARK_APICAL_SURFACE	0.0136587	0.0247879	0.38073	0.567347	1.66976	17	ATP6V0A4, GSTM3, SLC34A3, THY1, LYN, ATP8B1, FLOT2, DCBLD2, NCOA6
HALLMARK_APOPTOSIS	0.00809109	0.0172375	0.38073	0.343011	1.52004	99	TXNIP, PEA15, IL18, GSN, EREG, SOD2, LUM, TGFB2, CDKN1A, PSEN2, RETSAT, PPT1, FEZ1, PAK1, TSPO, CCND1, DCN, ANKH, BID, GSTM1, ANXA1, CAV1, PLAT, BCAP31, DNM1L, RNASEL, GPX4, GPX1
HALLMARK_BILE_ACID_METABOLISM	0.137072	0.186098	0.213928	0.318824	1.23761	54	SLC22A18, ABCA2, ABCA1, ABCD1, PRDX5, ACSL5, RETSAT, GSTK1, OPTN, MLYCD, ALDH9A1, PEX19, HSD17B4, ABCA3, PECR, HSD17B11, SCP2, SLC23A2, AR, CAT, PEX7, SOD1, HACL1
HALLMARK_CHOLESTEROL_HOMEOSTASIS	0.0909091	0.127273	0.261664	0.347396	1.33307	51	ABCA2, FBXO6, LGMN, PCYT2, ANXA5, TM7SF2, GSTM2, JAG1, MVK, ETHE1, ACSS2, ECH1, CD9, STARD4, NSDHL, MVD, ALCAM, FDPS, GNAI1
HALLMARK_COAGULATION	0.000663274	0.00203128	0.477271	0.447451	1.80665	63	DPP4, GSN, ACOX2, CTSH, CTSB, SPARC, CTSK, LGMN, PROS1, CTSO, LAMP2, SERPINC1, LTA4H, GNG12, MMP15, HTRA1, VWF, S100A13, ANXA1, PLAT, F8, CSRP1, FN1, FBN1, CD9, A2M, THBS1, ARF4, SERPINB2
HALLMARK_COMPLEMENT	2.60928e-05	0.000106545	0.57561	0.42631	1.87581	97	CD36, DPP4, KYNU, CTSH, CDA, CTSB, LIPA, COL4A2, LGMN, ANXA5, ATOX1, CTSO, LAMP2, CD59, SERPINC1, LTA4H, ME1, LYN, MMP15, S100A13, PLAT, F8, CSRP1, CTSS, FN1
HALLMARK_DNA_REPAIR	0.000138951	0.000486328	0.518848	-0.432108	-1.77452	111	PRIM1, TYMS, DUT, POLA1, LIG1, POLA2, RFC2, PCNA, RFC4, SSRP1, RPA3, FEN1, RPA2, MPG, NELFB, POLD1, ZWINT, DDB2, XPC, TAF6, ALYREF, AAAS, TAF12, POLE4, POLR2D, CLP1, GTF3C5, POLR2A, POLR2G, POM121, NELFE, USP11, ERCC1, POLR2K, NUDT21, SUPT4H1, SF3A3, TAF9, ERCC4, IMPDH2, DGCR8, SAC3D1, NCBP2, HPRT1, POLR2H, POLR3C, GTF2B, CETN2, CSTF3, RAE1, POLR1D, NT5C3A, SUPT5H, UPF3B
HALLMARK_E2F_TARGETS	1.34334e-45	6.58236e-44	1.76244	-0.771986	-3.29052	153	AURKB, ATAD2, KIF22, TIMELESS, CDCA8, CDCA3, H2AFZ, BRCA1, KIF18B, HELLS, HMGB2, BUB1B, CDC20, H2AFX, PSMC3IP, UBE2T, TOP2A, MCM6, PLK1, ORC6, GINS4, MKI67, MMS22L, DUT, MCM7, KIF4A, ASF1B, PRIM2, GINS3, RACGAP1, UBE2S, MCM3, DNMT1, SPC24, CENPE, TK1, TMPO, MCM2, HMMR, CENPM, MCM5, SPC25, CBX5, CIT, HMGB3, SMC6, RNASEH2A, SMC4, LIG1, GINS1, CKS1B, UBR7, BIRC5, POLA2, LBR, CHEK1, STAG1, RFC2, TRIP…
HALLMARK_EPITHELIAL_MESENCHYMAL_TRANSITION	1.17948e-07	7.2243e-07	0.704976	0.447939	2.11734	138	NNMT, FUCA1, SERPINE2, TGM2, COL11A1, MEST, IGFBP4, CALD1, TPM1, COL4A1, EDIL3, TPM2, RGS4, MYLK, TAGLN, CAP2, SPARC, LUM, ANPEP, COL4A2, OXTR, FSTL1, FAP, FLNA, CD59, LRRC15, PDLIM4, DAB2, THY1, NID2, SFRP1, COL5A2, DCN, DST, HTRA1, LOX, WNT5A, THBS2, LAMA3, P3H1, COL3A1, PLOD1, LAMA1, PVR, FN1, BDNF, LOXL2, FBN1, SGCD, PPIB, COLGALT1, COL5A1, THBS1, LAMC1, PLOD2, TPM4, ITGB5, SNTB1, LGALS1
HALLMARK_ESTROGEN_RESPONSE_EARLY	0.00107567	0.00292822	0.45506	0.384063	1.67938	93	SLC1A1, TGM2, TPD52L1, CLIC3, PODXL, IGFBP4, ABAT, HSPB8, ENDOD1, DYNLT3, ALDH3B1, SVIL, SYNGR1, WFS1, SLC9A3R1, TTC39A, FHL2, FAM102A, CCND1, ZNF185, DHRS3, SLC26A2, STC2, MLPH, GLA, SLC19A2, SCARB1, ABCA3, NADSYN1, FARP1, ADD3, PAPSS2, ADCY9, ABLIM1, PMAIP1
HALLMARK_ESTROGEN_RESPONSE_LATE	0.148936	0.192049	0.202072	0.280691	1.20875	78	TPD52L1, MEST, CLIC3, ACOX2, IGFBP4, TST, HSPB8, DYNLT3, ATP2B4, ALDH3B1, WFS1, PLXNB1, SLC9A3R1, ETFB, FAM102A, CCND1, SLC26A2, CAV1
HALLMARK_FATTY_ACID_METABOLISM	0.000751155	0.0021651	0.477271	0.385488	1.71833	102	CD36, G0S2, CRAT, ETFDH, EPHX1, ACAA1, ACSL5, EHHADH, HMGCL, HADHB, RETSAT, UROS, CPT2, GSTZ1, MLYCD, ME1, PCBD1, MCEE, ALDH9A1, GRHPR, ECH1, ACADS, DLD, HSD17B4, CBR1, ECHS1, CPOX, NSDHL, SERINC1, D2HGDH, HSD17B11, LGALS1, HSDL2, CRYZ, MDH2, DECR1, ALDH3A2, PSME1, PTPRG, HSD17B10, SUCLG1, IDH3G, MDH1, PDHB, ACOT2, DLST, SUCLG2, DHCR24, ECI1, MAOA, IDH1, MIF
HALLMARK_G2M_CHECKPOINT	2.20088e-38	5.39216e-37	1.6153	-0.752257	-3.172	142	AURKB, GINS2, TPX2, KIF22, CCNA2, H2AFZ, KIF11, CDC20, H2AFX, TOP2A, RBL1, MCM6, CHAF1A, PLK1, ORC6, UBE2C, MKI67, NSD2, CENPF, PBK, KIF4A, TTK, PRIM2, PRC1, RACGAP1, UBE2S, NDC80, MCM3, CENPE, NUSAP1, TMPO, MCM2, HMMR, SMC2, MCM5, KIF15, HMGB3, SMC4, TLE3, CKS1B, KNL1, BIRC5, POLA2, CBX1, LBR, CHEK1, STAG1, LMNB1, EZH2, MAD2L1, NASP, CKS2, SRSF2, KMT5A, ODC1, SMC1A, CDKN2C, ODF2, CTCF, KIF20B, S…
HALLMARK_GLYCOLYSIS	0.0378407	0.0579436	0.321776	0.282268	1.31017	126	AK4, GLRX, P4HA1, AK3, TXN, GALK1, PKM, P4HA2, AKR1A1, DPYSL4, SDC2, PYGB, PMM2, ME1, KDELR3, PYGL, MPI, DCN, LHPP, CYB5A, ARPP19, STC2, IDUA, AGL, ALDH9A1, SLC16A3, PLOD1, PGK1, DLD, GFPT1, FAM162A, GYS1, CTH, COL5A1, NSDHL, PHKA2, SLC35A3, PLOD2, GCLC, MDH2, HOMER1, PGAM1, COPB2, PC, IRS2, B3GAT3
HALLMARK_HEDGEHOG_SIGNALING	0.593333	0.646074	0.0614364	-0.316055	-0.906605	18	TLE3, NRP1, PLG, NRP2, LDB1, TLE1
HALLMARK_HEME_METABOLISM	0.000243211	0.000794488	0.518848	0.385728	1.741	112	CLIC2, SNCA, CTSB, ENDOD1, BPGM, DAAM1, ATP6V0A1, ALDH6A1, HAGH, SIDT2, ADIPOR1, CCND3, TMEM9B, P4HA2, LAMP2, MGST3, UROS, FBXO9, EPB41, CLCN3, FN3K, OPTN, SDCBP, HEBP1, SELENBP1, ISCA1, RBM38, PPP2R5B, MAP2K3, GDE1, BSG, ATG4A, MKRN1, CPOX, CCDC28A, SLC30A1, BMP2K, MOSPD1, ANK1, GYPC, LPIN2, LRP10, MOCOS, ADD1, GCLC, UBAC1
HALLMARK_HYPOXIA	1.29046e-05	5.7484e-05	0.593325	0.421048	1.88204	103	PPP1R3C, AK4, TGM2, GLRX, AMPD3, NDST2, P4HA1, DTNA, GAA, GALK1, PRDX5, NAGK, HEXA, P4HA2, CDKN1A, DPYSL4, NEDD4L, LXN, SDC2, SLC2A3, PLIN2, TMEM45A, KDELR3, DCN, LOX, STC2, CAV1, PGM1, SELENBP1, NDST1, GRHPR, VHL, ANXA2, TPST2, PGK1, FAM162A, GYS1, COL5A1, SCARB1, NDRG1
HALLMARK_IL2_STAT5_SIGNALING	0.140523	0.186098	0.216543	0.273433	1.20622	96	TGM2, P4HA1, PLPP1, SYNGR2, ANXA4, SH3BGRL2, CCND3, PRAF2, MAP6, FAH, SERPINC1, SLC2A3, PLIN2, DHRS3, ABCB1, PLEC, PRNP, PTRH2, GPX4, P2RX4, CD81, SNX14, NDRG1, CKAP4, GALM, SERPINB6, AHCY, DENND5A, ALCAM, CTSZ, IFITM3, AHR, SPRED2
HALLMARK_IL6_JAK_STAT3_SIGNALING	0.303867	0.363159	0.130106	0.305705	1.08291	35	CD36, PTPN1, STAT3, BAK1, CD9, A2M
HALLMARK_INFLAMMATORY_RESPONSE	0.0193234	0.0316559	0.352488	0.36576	1.47681	63	IL18, RNF144B, KCNJ2, EREG, ABCA1, CD82, ADRM1, CDKN1A, SRI, LYN, ICAM1, SLC31A1, HBEGF, PVR, P2RX4, LPAR1, DCBLD2, ATP2B1
HALLMARK_INTERFERON_ALPHA_RESPONSE	0.0141748	0.0248059	0.38073	0.397896	1.52535	52	TXNIP, IFIT2, GMPR, LGALS3BP, UBA7, TRAFD1, SAMD9L, GBP2, ISG15, NCOA7, IFIT3, PSME2, PARP9, IFI35, PSMB8, IFITM3
HALLMARK_INTERFERON_GAMMA_RESPONSE	0.0063959	0.0142454	0.407018	0.34826	1.51864	91	TXNIP, IFIT2, BPGM, SOD2, HLA-B, PTPN1, MVP, ST3GAL5, PSMB10, CDKN1A, LGALS3BP, TRAFD1, SAMD9L, SRI, IFIT1, ICAM1, ISG15, STAT3, DDX58, VAMP5
HALLMARK_KRAS_SIGNALING_DN	0.345013	0.402516	0.119348	0.313798	1.06621	30	SYNPO, COPZ2, FGGY, TGFB2, PDK2, IDUA, ABCB11, EPHA5, MTHFR, SERPINB2, COQ8A, CAMK1D, ENTPD7, SPTBN2
HALLMARK_KRAS_SIGNALING_UP	0.0193812	0.0316559	0.352488	0.347009	1.46636	73	FUCA1, GLRX, EREG, BPGM, SNAP25, ST6GAL1, G0S2, GPNMB, EVI5, ANKH, ABCB1, HDAC9, HBEGF, PLAT, CTSS, USP12, EPB41L3, ITGBL1, DCBLD2, ANO1, TOR1AIP2, CCSER2, GYPC, ENG, PSMB8, SNAP91, RELN
HALLMARK_MITOTIC_SPINDLE	3.6594e-06	1.99234e-05	0.627257	-0.440575	-1.88467	157	TPX2, KIF22, KIF11, TOP2A, PLK1, CENPF, KIF4A, TTK, PRC1, RACGAP1, NDC80, CENPE, NUSAP1, ECT2, ANLN, KIF15, SMC4, BIRC5, LMNB1, DLGAP5, SMC3, KNTC1, SMC1A, KIF20B, CEP57, NUMA1, INCENP, RFC1
HALLMARK_MTORC1_SIGNALING	0.814815	0.83179	0.036073	-0.199899	-0.842903	142	PLK1, MCM2, DHFR, IFRD1, RPA1, MTHFD2, NUFIP1, HMGCR, PHGDH, TMEM97, GMPS, PNO1, ASNS, NUP205, TCEA1, SLC1A4, TUBG1, FADS1, CACYBP, UCHL5, NFIL3, PSME3, CCNG1, FGL2, RRP9, HPRT1, SLC7A5, FADS2, SQSTM1, SLC7A11, NFYC, CANX, ELOVL5
HALLMARK_MYC_TARGETS_V1	2.80227e-13	4.57704e-12	0.932595	-0.536366	-2.31499	170	CCNA2, H2AFZ, CDC20, MCM6, TYMS, DUT, MCM7, MCM2, MCM5, IFRD1, EXOSC7, POLD2, MAD2L1, SRSF2, PCNA, RFC4, CBX3, ODC1, DEK, CNBP, RRM1, SMARCC1, DDX21, HNRNPC, MYC, CDK2, SF3B3, FBL, POLE3, SNRPB2, BUB3, SRSF7, DDX18, PABPC1, RANBP1, SNRPD2, HDAC2, DHX15, TRA2B, HNRNPU, HNRNPA2B1, UBE2E1, RNPS1, NCBP1, PRPF31, SRSF3, XRCC6, NOP56, NHP2, LSM7, UBA2, TARDBP, SNRPA, HNRNPR, SF3A1, IMPDH2, APEX1, SRSF1…
HALLMARK_MYC_TARGETS_V2	2.55679e-08	2.08804e-07	0.733762	-0.674018	-2.38006	46	PLK1, MCM5, CBX3, UTP20, MYC, EXOSC5, TMEM97, DDX18, GRWD1, SLC19A1, RCL1, MPHOSPH10, IMP4, NOP56, TFB2M, NIP7, PRMT3, WDR43, NOC4L, PES1, NOP2, BYSL, MYBBP1A, RRP12, RRP9, WDR74, LAS1L, NOP16, NPM1, TCOF1
HALLMARK_MYOGENESIS	1.53449e-09	1.5038e-08	0.788187	0.545574	2.41609	100	CD36, PPP1R3C, IGFBP7, CRYAB, TPD52L1, GSN, ITGA7, FABP3, HSPB8, TPM2, DAPK2, SYNGR2, MYLK, TAGLN, DTNA, MRAS, CRAT, TPM3, SPARC, GAA, COL4A2, SVIL, AK1, CDKN1A, PSEN2, FHL1, SCHIP1, MAPRE3, COX7A1, STC2, DMD, AGL, PRNP, CAMK2B, HBEGF, CTF1, COL3A1, CNN3
HALLMARK_NOTCH_SIGNALING	0.65995	0.70299	0.0766747	0.282269	0.853559	19	ARRB1, PSEN2, JAG1, CCND1, WNT5A
HALLMARK_OXIDATIVE_PHOSPHORYLATION	5.27698e-08	3.69389e-07	0.719513	0.4476	2.14449	151	ALDH6A1, ETFDH, ATP6V1H, ETFA, ACAA1, ATP6V0C, MGST3, NDUFAB1, ATP6V1G1, HADHB, RETSAT, HADHA, TCIRG1, ETFB, SLC25A20, CYB5A, ATP6V1E1, ISCA1, ATP6V1C1, NDUFB5, ECH1, GPX4, NDUFC1, AIFM1, ATP6V1F, NDUFA3, ACAT1, DLD, ECHS1, CYB5R3, BDH2, ACADSB, OGDH, COX7C, NQO2, MDH2, PRDX3, COX6B1, COX7A2, DECR1, VDAC2, VDAC1, NDUFA4, ATP6AP1, NDUFB1, SDHB, HSD17B10, SUCLG1, IDH3G, MDH1, PDHB, GPI, DLST, NNT, …
HALLMARK_P53_PATHWAY	0.00995332	0.0195085	0.38073	0.318042	1.4355	112	FUCA1, TXNIP, TPD52L1, ADA, GM2A, ABAT, EPS8L2, CTSF, CD82, ABCC5, CDKN2A, EPHX1, AK1, TSC22D1, CCND3, CDKN1A, RETSAT, PMM1, DGKA, TRAFD1, ZFP36L1, HBEGF, STOM, SLC19A2, BAK1, VAMP8, FAM162A, CD81, MDM2, ABHD4, TM7SF3, RAP2B, NDRG1, BAIAP2, RCHY1
HALLMARK_PEROXISOME	0.00276029	0.00644067	0.431708	0.389844	1.6248	70	CLN8, SOD2, ABCD1, ABCC5, CRAT, PRDX5, MVP, ACAA1, STS, ACSL5, EHHADH, HMGCL, RETSAT, PEX11B, GSTK1, TSPO, MLYCD, DHRS3, ABCB1, ALDH9A1, FIS1, ABCB4, ECH1
HALLMARK_PI3K_AKT_MTOR_SIGNALING	0.580745	0.646074	0.095288	0.224501	0.935677	70	THEM4, CDKN1A, PLA2G12A, AKT1S1, MAP2K3, PRKAA2, DUSP3, MKNK1, ITPR2, ARPC3, PRKAR2A, MAPK9, TSC2, NCK1, ACTR2, CFL1, CLTC, MAPK1, YWHAB, PRKAG1, IRAK4, RPTOR, MYD88, ACTR3, PTPN11, SMAD2, PFN1, RIPK1, CAB39L, AKT1
HALLMARK_PROTEIN_SECRETION	1.20072e-05	5.7484e-05	0.593325	0.489539	2.11072	79	ABCA1, ATP6V1H, CD63, STX12, STX7, CAV2, LAMP2, PPT1, CLCN3, SEC22B, DST, ARFIP1, DNM1L, GLA, VAMP3, RAB9A, USO1, RAB22A, BNIP3, AP2S1, SCRN1, YKT6, RAB5A, SNAP23, VAMP4, ATP7A, NAPA, CLN5, COPB2, IGF2R, SOD1, TMED2, VPS4B, SEC31A, VAMP7, RAB2A, KIF1B, GBF1, OCRL, AP3S1, STAM, GOSR2, CLTC, MAPK1, ARFGEF2, CLTA, VPS45, AP3B1, RER1, TSG101, YIPF6, SEC24D
HALLMARK_REACTIVE_OXYGEN_SPECIES_PATHWAY	0.00146936	0.00378941	0.45506	0.522306	1.85018	35	GLRX, LAMTOR5, SOD2, FTL, TXN, ATOX1, MGST1, PRNP, PRDX4, STK25, GPX4, PRDX1, GCLC, TXNRD1, CAT, SOD1, ABCC1, HMOX2
HALLMARK_SPERMATOGENESIS	0.032591	0.0515148	0.321776	-0.450318	-1.53141	39	PARP2, TTK, EZH2, RFC4, SIRT1, TOPBP1, PIAS2, RAD17
HALLMARK_TGF_BETA_SIGNALING	0.916667	0.916667	0.0386372	-0.212623	-0.699511	34	ARID4B, HDAC1, TRIM33, LTBP2, SKI, NCOR2, TGFBR1, CDK9, BMPR1A, UBE2D3, XIAP, SLC20A1, TGFB1, SMAD7, APC, BCAR3
HALLMARK_TNFA_SIGNALING_VIA_NFKB	0.224756	0.275326	0.168238	0.265003	1.1418	84	SLC16A6, IL18, KYNU, IFIT2, ABCA1, SOD2, G0S2, SLC2A6, TSC22D1, CDKN1A, JAG1, SLC2A3, CCND1, ICAM1, DDX58, LAMB3, TUBB2A, HBEGF
HALLMARK_UNFOLDED_PROTEIN_RESPONSE	0.00242845	0.00594971	0.431708	-0.409039	-1.60852	86	H2AFX, CKS1B, FUS, NFYB, NFYA, MTHFD2, EXOSC2, EXOSC10, EXOSC9, EXOSC5, DDX10, ASNS, EXOSC4, LSM4, SLC1A4, CXXC1, KHSRP, EXOSC1, NOP56, NHP2, CNOT6, CHAC1, ERN1, ZBTB17, PARN, RPS14, DKC1, DCP1A, CEBPB, RRP9, SLC7A5, SDAD1, NPM1, IMP3, TATDN2, EDEM1, EIF4A1, POP4
HALLMARK_UV_RESPONSE_DN	0.0097214	0.0195085	0.38073	0.330754	1.48637	104	COL11A1, SLC22A18, KCNMA1, KALRN, ATP2B4, RGS4, WDR37, CAP2, ANXA4, TGFBR2, ADGRL2, FHL2, DAB2, SCHIP1, SRI, SDC2, COL5A2, PLCB4, CAV1, CELF2, COL3A1, ANXA2, PTPRM, PIK3CD, BDNF, APBB2, IRS1, LPAR1, ATP2B1, PEX14, LAMC1, ADD3, ATRN, IGFBP5, MAP1B
HALLMARK_UV_RESPONSE_UP	0.375415	0.427799	0.128143	0.236605	1.03073	88	CYB5R1, TST, SOD2, SPR, EPHX1, ACAA1, NAT1, CCND3, PPT1, TUBA4A, LYN, ICAM1, BID, ABCB1, ATP6V1C1, STK25, SIGMAR1, BAK1, ATP6V1F, BSG, DGAT1, AP2S1, SELENOW, CDO1
HALLMARK_WNT_BETA_CATENIN_SIGNALING	0.17734	0.222812	0.131458	-0.414756	-1.2303	22	KAT2A, SKP2, MYC, PPARD, RBPJ, HDAC2
HALLMARK_XENOBIOTIC_METABOLISM	5.04793e-05	0.000190268	0.557332	0.404673	1.81362	106	CD36, KYNU, ACOX2, IGFBP4, CDA, ACP1, DHRS1, GSTT2, ETFDH, EPHX1, PROS1, TGFB2, PSMB10, RETSAT, PMM1, ACP2, DHRS7, FAH, ASL, COMT, CYB5A, ARPP19, ALDH9A1, ECH1, SLC12A4, ALDH2, CBR1, DDT, ENTPD5, MPP2, NFS1, CDO1, ADH5, PTGR1, PAPSS2, AHCY, LPIN2, DCXR, GCLC, HSD17B2, PC, CAT, PYCR1, HMOX1, HACL1

## Sheet: PDL37
pathway	pval	padj	log2err	ES	NES	size	leadingEdge
HALLMARK_ADIPOGENESIS	3.10153e-09	2.53292e-08	0.774939	0.483747	2.27563	127	CD36, TST, ABCA1, MYLK, HSPB8, LPCAT3, LAMA4, CRAT, COL4A1, FABP4, ETFB, ITGA7, CMBL, PLIN2, CMPK1, DNAJB9, REEP5, RETSAT, CPT2, MCCC1, MIGA2, FAH, ME1, SOD1, DDT, STOM, NDUFAB1, DHRS7B, AIFM1, TANK, COX6A1, BCL2L13, DHRS7, MGST3, DBT, DGAT1, ECH1, ENPP2, GPX4, ECHS1, ITSN1, ALDH2, ACADS, SCARB1, SDHB, SOWAHC, RMDN3, NKIRAS1, PGM1, DLD, ACLY, MDH2, PRDX3, PQLC3, CAT, SCP2, ADCY6, NMT1, PREB, SUCL…
HALLMARK_ALLOGRAFT_REJECTION	0.697452	0.781852	0.0862866	0.217129	0.880577	60	EREG, GBP2, FLNA, THY1, TGFB2, CCND3, ICAM1, STAT1, CDKN2A, IKBKB, PSMB10, TAP1, LYN, IL18, TAPBP, NCK1, HDAC9, CTSS, CAPG, CD4, EIF5A, ABI1, EIF3J
[truncated: 47 more rows]

## Sheet: PDL46
pathway	pval	padj	log2err	ES	NES	size	leadingEdge
[truncated: 49 more rows]

## Sheet: PDL50
pathway	pval	padj	log2err	ES	NES	size	leadingEdge
[truncated: 49 more rows]

## Sheet: hTERT2_fc
pathway	pval	padj	log2err	ES	NES	size	leadingEdge
[truncated: 49 more rows]

[truncated: 4 more sheets: hTERT4_fc, hTERT5_fc, hTERT6_fc, hTERT7_fc]
